# Supplementary material for: Daily ensemble river discharge reforecasts and real-time forecasts from the operational Global Flood Awareness System
Source: Copernicus journal article supplement (doi:10.5194/hess-2020-532), 2020-10-16
Supplement: Supplementary file 2 [file hess-2020-532-supplement.zip]

---

# Global Flood Awareness System

---

## Climatology skill scores

|                                                                             |            |
|-----------------------------------------------------------------------------|------------|
| <i>Table 1: GloFAS climatology skill scores for Africa. ....</i>            | <i>1</i>   |
| <i>Table 2: GloFAS climatology skill scores for Asia. ....</i>              | <i>30</i>  |
| <i>Table 3: GloFAS climatology skill scores for Australia-Oceania. ....</i> | <i>84</i>  |
| <i>Table 4: GloFAS climatology skill scores for Europe.. ....</i>           | <i>89</i>  |
| <i>Table 5: GloFAS climatology skill scores for North America. ....</i>     | <i>105</i> |
| <i>Table 6: GloFAS climatology skill scores for South America. ....</i>     | <i>136</i> |

Table 1: GloFAS climatology skill scores for Africa.

| Country                           | GloFAS ID | Station filter | LT1  | LT2  | LT3  | LT4  | LT5  | LT6  | LT7  | LT8  | LT9  | LT10 | LT12 | LT14  | LT16   | LT18   | LT20   | LT25   | L30    |
|-----------------------------------|-----------|----------------|------|------|------|------|------|------|------|------|------|------|------|-------|--------|--------|--------|--------|--------|
| Abyei Region (disputed territory) | G4992     | 1              | 1.00 | 1.00 | 1.00 | 0.99 | 0.99 | 0.99 | 0.98 | 0.98 | 0.97 | 0.96 | 0.94 | 0.92  | 0.88   | 0.83   | 0.78   | 0.60   | 0.39   |
| Abyei Region (disputed territory) | G4995     | 1              | 1.00 | 1.00 | 1.00 | 0.99 | 0.98 | 0.97 | 0.96 | 0.95 | 0.94 | 0.93 | 0.91 | 0.87  | 0.83   | 0.78   | 0.72   | 0.55   | 0.38   |
| Algeria                           | G0814     | 1              | 0.95 | 0.89 | 0.83 | 0.77 | 0.70 | 0.62 | 0.53 | 0.47 | 0.41 | 0.36 | 0.26 | 0.19  | 0.14   | 0.11   | 0.08   | 0.04   | 0.05   |
| Algeria                           | G4208     | 1              | 1.00 | 0.97 | 0.90 | 0.82 | 0.73 | 0.64 | 0.56 | 0.50 | 0.45 | 0.39 | 0.30 | 0.25  | 0.21   | 0.17   | 0.17   | 0.15   | 0.15   |
| Algeria                           | G4209     | 1              | 0.99 | 0.94 | 0.86 | 0.75 | 0.65 | 0.56 | 0.51 | 0.45 | 0.39 | 0.34 | 0.27 | 0.24  | 0.21   | 0.19   | 0.17   | 0.17   | 0.17   |
| Algeria                           | G4212     | 1              | 0.99 | 0.98 | 0.99 | 0.99 | 0.99 | 0.99 | 0.99 | 0.99 | 0.96 | 0.94 | 0.92 | 0.91  | 0.60   | 0.64   | 0.63   | 0.36   | 0.10   |
| Algeria                           | G4213     | 1              | 0.99 | 0.96 | 0.91 | 0.84 | 0.75 | 0.65 | 0.58 | 0.52 | 0.48 | 0.43 | 0.35 | 0.30  | 0.27   | 0.24   | 0.24   | 0.22   | 0.21   |
| Algeria                           | G4274     | 1              | 1.00 | 0.99 | 0.99 | 0.99 | 0.98 | 0.98 | 0.97 | 0.97 | 0.96 | 0.95 | 0.93 | 0.91  | 0.86   | 0.82   | 0.81   | 0.76   | 0.71   |
| Algeria                           | G4280     | 0              | -    | -    | -    | -    | -    | -    | -    | -    | -    | -    | -    | -     | -      | -      | -      | -      | -      |
| Algeria                           | G4302     | 0              | -    | -    | -    | -    | -    | -    | -    | -    | -    | -    | -    | -     | -      | -      | -      | -      | -      |
| Algeria                           | G4306     | 0              | -    | -    | -    | -    | -    | -    | -    | -    | -    | -    | -    | -     | -      | -      | -      | -      | -      |
| Algeria                           | G4319     | 0              | 1.00 | 1.00 | 1.00 | 1.00 | 1.00 | 1.00 | 1.00 | 1.00 | 1.00 | 1.00 | 1.00 | 1.00  | -4.88  | -52.69 | -39.67 | -19.21 | -11.75 |
| Algeria                           | G4320     | 0              | -    | -    | -    | -    | -    | -    | -    | -    | -    | -    | -    | -     | -      | -      | -      | -      | -      |
| Algeria                           | G4325     | 1              | 0.98 | 0.98 | 0.93 | 0.90 | 0.78 | 0.73 | 0.73 | 0.69 | 0.63 | 0.50 | 0.30 | -0.01 | -0.21  | -0.21  | -5.91  | -12.51 | -69.48 |
| Algeria                           | G4326     | 1              | 0.99 | 0.98 | 0.97 | 0.96 | 0.95 | 0.93 | 0.92 | 0.90 | 0.88 | 0.87 | 0.84 | 0.79  | 0.71   | 0.65   | 0.66   | 0.61   | 0.47   |
| Algeria                           | G4346     | 1              | 1.00 | 1.00 | 1.00 | 0.99 | 0.98 | 0.97 | 0.96 | 0.91 | 0.85 | 0.82 | 0.70 | 0.59  | 0.49   | 0.44   | 0.36   | 0.27   | 0.20   |
| Algeria                           | G4347     | 1              | 0.96 | 0.90 | 0.85 | 0.82 | 0.78 | 0.74 | 0.69 | 0.66 | 0.62 | 0.58 | 0.51 | 0.46  | 0.42   | 0.38   | 0.36   | 0.30   | 0.27   |
| Algeria                           | G4352     | 1              | 1.00 | 1.00 | 1.00 | 0.94 | 0.81 | 0.84 | 0.90 | 0.91 | 0.89 | 0.88 | 0.86 | 0.80  | 0.74   | 0.70   | 0.64   | 0.54   | 0.45   |
| Algeria                           | G4390     | 1              | 1.00 | 1.00 | 1.00 | 1.00 | 1.00 | 0.98 | 0.93 | 0.86 | 0.83 | 0.87 | 0.93 | 0.90  | 0.89   | 0.84   | 0.79   | 0.70   | 0.60   |
| Algeria                           | G4397     | 1              | 1.00 | 1.00 | 1.00 | 1.00 | 1.00 | 0.99 | 0.94 | 0.86 | 0.82 | 0.82 | 0.93 | 0.91  | 0.92   | 0.86   | 0.82   | 0.71   | 0.66   |
| Algeria                           | G4404     | 0              | -    | -    | -    | -    | -    | -    | -    | -    | -    | -    | -    | -     | -      | -      | -      | -      | -      |
| Algeria                           | G4405     | 0              | -    | -    | -    | -    | -    | -    | -    | -    | -    | -    | -    | -     | -      | -      | -      | -      | -      |
| Algeria                           | G4452     | 1              | 1.00 | 1.00 | 1.00 | 0.99 | 0.98 | 0.96 | 0.90 | 0.74 | 0.55 | 0.44 | 0.43 | 0.49  | 0.29   | 0.42   | 0.47   | 0.52   | 0.33   |
| Algeria                           | G4459     | 1              | 1.00 | 1.00 | 1.00 | 0.97 | 0.94 | 0.89 | 0.84 | 0.79 | 0.68 | 0.62 | 0.65 | 0.70  | 0.68   | 0.66   | 0.60   | 0.51   | 0.36   |
| Algeria                           | G4473     | 0              | -    | -    | -    | -    | -    | -    | -    | -    | -    | -    | -    | -     | -      | -      | -      | -      | -      |
| Algeria                           | G4477     | 0              | -    | -    | -    | -    | -    | -    | -    | -    | -    | -    | -    | -     | -      | -      | -      | -      | -      |
| Algeria                           | G4478     | 1              | 1.00 | 0.99 | 0.99 | 0.99 | 0.98 | 0.98 | 0.97 | 0.96 | 0.93 | 0.93 | 0.72 | 0.70  | 0.81   | 0.67   | 0.65   | 0.58   | 0.48   |
| Algeria                           | G4524     | 1              | 1.00 | 1.00 | 0.99 | 0.99 | 0.99 | 0.99 | 0.99 | 0.98 | 0.98 | 0.97 | 0.96 | 0.92  | 0.85   | 0.79   | 0.74   | 0.62   | 0.51   |
| Algeria                           | G4525     | 1              | 1.00 | 0.99 | 0.99 | 0.99 | 0.99 | 0.99 | 0.98 | 0.98 | 0.97 | 0.97 | 0.96 | 0.95  | 0.95   | 0.94   | 0.66   | -0.29  | 0.26   |
| Algeria                           | G4527     | 1              | 1.00 | 0.99 | 0.99 | 0.98 | 0.98 | 0.97 | 0.96 | 0.96 | 0.96 | 0.95 | 0.93 | 0.90  | 0.88   | 0.75   | 0.70   | 0.40   | 0.36   |
| Algeria                           | G4528     | 1              | 1.00 | 1.00 | 0.99 | 0.99 | 0.99 | 0.99 | 0.99 | 0.98 | 0.98 | 0.97 | 0.94 | 0.89  | 0.81   | 0.76   | 0.72   | 0.60   | 0.48   |
| Algeria                           | G4609     | 0              | -    | -    | -    | -    | -    | -    | -    | -    | -    | -    | -    | -     | -      | -      | -      | -      | -      |
| Algeria                           | G4613     | 0              | -    | -    | -    | -    | -    | -    | -    | -    | -    | -    | -    | -     | -      | -      | -      | -      | -      |
| Algeria                           | G4637     | 0              | -    | -    | -    | -    | -    | -    | -    | -    | -    | -    | -    | -     | -      | -      | -      | -      | -      |
| Algeria                           | G4638     | 1              | 1.00 | 1.00 | 1.00 | 0.99 | 0.99 | 0.99 | 0.99 | 0.98 | 0.98 | 0.98 | 0.97 | 0.96  | 0.95   | 0.94   | 0.81   | 0.67   | 0.72   |
| Algeria                           | G4639     | 0              | -    | -    | -    | -    | -    | -    | -    | -    | -    | -    | -    | -     | -      | -      | -      | -      | -      |
| Algeria                           | G4640     | 0              | 1.00 | 1.00 | 1.00 | 1.00 | 1.00 | 1.00 | 1.00 | 1.00 | 1.00 | 0.99 | 0.98 | -3.58 | -12.92 | -10.82 | -7.87  | -25.52 | -25.21 |
| Algeria                           | G4641     | 0              | 1.00 | 1.00 | 1.00 | 1.00 | 1.00 | 1.00 | 1.00 | 1.00 | 1.00 | 1.00 | 0.86 | 0.78  | 0.81   | 0.83   | 0.65   | 0.10   | 0.27   |

| Country | GloFAS ID | Station filter | LT1  | LT2  | LT3  | LT4  | LT5  | LT6   | LT7   | LT8   | LT9   | LT10  | LT12   | LT14   | LT16   | LT18   | LT20   | LT25  | L30   |
|---------|-----------|----------------|------|------|------|------|------|-------|-------|-------|-------|-------|--------|--------|--------|--------|--------|-------|-------|
| Algeria | G4642     | 0              | -    | -    | -    | -    | -    | -     | -     | -     | -     | -     | -      | -      | -      | -      | -      | -     | -     |
| Algeria | G4666     | 1              | 0.98 | 0.97 | 0.72 | 0.68 | 0.81 | 0.43  | 0.50  | 0.45  | 0.42  | 0.23  | -17.13 | -      | -      | -      | -      | -     | -     |
| Algeria | G4669     | 1              | 1.00 | 1.00 | 1.00 | 1.00 | 1.00 | 1.00  | 1.00  | 0.99  | 0.99  | 0.99  | 0.74   | -7.74  | -4.20  | -1.23  | -0.83  | 0.03  | -0.48 |
| Algeria | G4687     | 0              | 1.00 | 1.00 | 1.00 | 1.00 | 1.00 | 1.00  | 1.00  | 1.00  | 1.00  | 1.00  | 0.85   | -78.24 | -57.46 | -25.51 | -13.59 | -7.82 | -9.91 |
| Algeria | G4717     | 1              | 1.00 | 1.00 | 1.00 | 0.99 | 0.99 | 0.99  | 0.99  | 0.99  | 0.99  | 0.98  | 0.85   | 0.86   | 0.61   | 0.72   | 0.67   | 0.54  | 0.58  |
| Angola  | G5480     | 1              | 1.00 | 0.99 | 0.98 | 0.95 | 0.92 | 0.88  | 0.83  | 0.76  | 0.66  | 0.55  | 0.31   | 0.08   | -0.10  | -0.22  | -0.31  | -0.39 | -0.36 |
| Angola  | G5520     | 1              | 0.98 | 0.94 | 0.88 | 0.78 | 0.61 | 0.32  | -0.09 | -0.61 | -1.16 | -1.68 | -2.57  | -3.22  | -3.70  | -4.09  | -4.34  | -4.50 | -4.31 |
| Angola  | G5521     | 1              | 1.00 | 0.99 | 0.96 | 0.91 | 0.83 | 0.73  | 0.62  | 0.52  | 0.43  | 0.35  | 0.21   | 0.11   | 0.05   | 0.00   | -0.02  | -0.02 | 0.02  |
| Angola  | G5530     | 1              | 1.00 | 0.96 | 0.85 | 0.66 | 0.41 | 0.16  | -0.06 | -0.25 | -0.40 | -0.52 | -0.69  | -0.80  | -0.88  | -0.90  | -0.89  | -0.82 | -0.73 |
| Angola  | G5540     | 1              | 0.99 | 0.93 | 0.84 | 0.73 | 0.61 | 0.49  | 0.39  | 0.29  | 0.22  | 0.16  | 0.08   | 0.02   | -0.03  | -0.06  | -0.06  | -0.03 | 0.01  |
| Angola  | G5541     | 1              | 0.99 | 0.98 | 0.94 | 0.89 | 0.82 | 0.76  | 0.69  | 0.62  | 0.56  | 0.51  | 0.42   | 0.36   | 0.32   | 0.29   | 0.27   | 0.26  | 0.26  |
| Angola  | G5561     | 1              | 0.95 | 0.84 | 0.65 | 0.39 | 0.08 | -0.22 | -0.48 | -0.69 | -0.86 | -1.01 | -1.19  | -1.31  | -1.35  | -1.37  | -1.37  | -1.22 | -1.03 |
| Angola  | G5563     | 1              | 0.98 | 0.93 | 0.86 | 0.76 | 0.62 | 0.45  | 0.28  | 0.11  | -0.04 | -0.16 | -0.33  | -0.42  | -0.46  | -0.47  | -0.45  | -0.37 | -0.25 |
| Angola  | G5571     | 1              | 0.99 | 0.93 | 0.81 | 0.63 | 0.42 | 0.21  | 0.03  | -0.13 | -0.25 | -0.35 | -0.48  | -0.53  | -0.54  | -0.52  | -0.45  | -0.23 | -0.07 |
| Angola  | G5573     | 1              | 0.98 | 0.90 | 0.79 | 0.66 | 0.54 | 0.44  | 0.35  | 0.27  | 0.20  | 0.15  | 0.07   | 0.03   | 0.00   | -0.02  | -0.04  | -0.04 | -0.02 |
| Angola  | G5576     | 1              | 0.98 | 0.90 | 0.81 | 0.70 | 0.59 | 0.49  | 0.39  | 0.31  | 0.24  | 0.18  | 0.10   | 0.05   | 0.02   | 0.01   | 0.00   | 0.02  | 0.05  |
| Angola  | G5579     | 1              | 0.97 | 0.83 | 0.67 | 0.54 | 0.44 | 0.37  | 0.32  | 0.28  | 0.24  | 0.21  | 0.16   | 0.12   | 0.07   | 0.02   | -0.01  | -0.08 | -0.10 |
| Angola  | G5614     | 1              | 1.00 | 1.00 | 0.99 | 0.99 | 0.98 | 0.97  | 0.96  | 0.94  | 0.92  | 0.90  | 0.84   | 0.77   | 0.70   | 0.63   | 0.57   | 0.45  | 0.37  |
| Angola  | G5615     | 1              | 1.00 | 0.99 | 0.96 | 0.91 | 0.84 | 0.76  | 0.68  | 0.61  | 0.55  | 0.50  | 0.41   | 0.35   | 0.31   | 0.29   | 0.31   | 0.31  | 0.26  |
| Angola  | G5623     | 1              | 1.00 | 1.00 | 0.99 | 0.99 | 0.99 | 0.98  | 0.97  | 0.96  | 0.95  | 0.93  | 0.88   | 0.82   | 0.74   | 0.67   | 0.59   | 0.46  | 0.37  |
| Angola  | G5624     | 1              | 1.00 | 1.00 | 0.99 | 0.98 | 0.95 | 0.92  | 0.87  | 0.82  | 0.78  | 0.73  | 0.66   | 0.58   | 0.52   | 0.48   | 0.45   | 0.43  | 0.38  |
| Angola  | G5673     | 1              | 1.00 | 0.99 | 0.98 | 0.95 | 0.91 | 0.86  | 0.80  | 0.74  | 0.68  | 0.62  | 0.50   | 0.40   | 0.31   | 0.23   | 0.15   | -0.01 | -0.11 |
| Angola  | G5675     | 1              | 1.00 | 0.99 | 0.98 | 0.96 | 0.94 | 0.91  | 0.88  | 0.84  | 0.80  | 0.76  | 0.68   | 0.61   | 0.55   | 0.48   | 0.43   | 0.29  | 0.20  |
| Angola  | G5692     | 1              | 0.99 | 0.98 | 0.98 | 0.97 | 0.95 | 0.93  | 0.91  | 0.88  | 0.85  | 0.82  | 0.75   | 0.68   | 0.61   | 0.56   | 0.51   | 0.41  | 0.33  |
| Angola  | G5695     | 1              | 0.99 | 0.99 | 0.98 | 0.96 | 0.93 | 0.90  | 0.87  | 0.82  | 0.78  | 0.75  | 0.67   | 0.61   | 0.55   | 0.50   | 0.45   | 0.36  | 0.30  |
| Angola  | G5706     | 1              | 1.00 | 0.99 | 0.99 | 0.98 | 0.98 | 0.96  | 0.93  | 0.90  | 0.86  | 0.81  | 0.73   | 0.64   | 0.55   | 0.48   | 0.41   | 0.24  | 0.07  |
| Angola  | G5709     | 1              | 1.00 | 1.00 | 0.99 | 0.99 | 0.97 | 0.95  | 0.92  | 0.89  | 0.84  | 0.79  | 0.69   | 0.59   | 0.51   | 0.44   | 0.39   | 0.27  | 0.17  |
| Angola  | G5713     | 1              | 1.00 | 1.00 | 1.00 | 0.99 | 0.99 | 0.98  | 0.96  | 0.94  | 0.92  | 0.88  | 0.81   | 0.73   | 0.65   | 0.57   | 0.49   | 0.32  | 0.19  |
| Angola  | G5714     | 1              | 1.00 | 0.99 | 0.97 | 0.96 | 0.94 | 0.92  | 0.89  | 0.87  | 0.84  | 0.82  | 0.77   | 0.71   | 0.66   | 0.61   | 0.57   | 0.46  | 0.38  |
| Angola  | G5715     | 1              | 1.00 | 1.00 | 1.00 | 1.00 | 1.00 | 0.99  | 0.99  | 0.98  | 0.97  | 0.96  | 0.94   | 0.90   | 0.87   | 0.83   | 0.79   | 0.70  | 0.62  |
| Angola  | G5717     | 1              | 1.00 | 1.00 | 1.00 | 1.00 | 0.99 | 0.99  | 0.98  | 0.97  | 0.96  | 0.95  | 0.93   | 0.91   | 0.88   | 0.85   | 0.81   | 0.74  | 0.67  |
| Angola  | G5723     | 1              | 1.00 | 1.00 | 1.00 | 0.99 | 0.99 | 0.99  | 0.98  | 0.98  | 0.98  | 0.97  | 0.97   | 0.96   | 0.95   | 0.94   | 0.92   | 0.88  | 0.82  |
| Angola  | G5726     | 1              | 1.00 | 1.00 | 1.00 | 1.00 | 0.99 | 0.99  | 0.99  | 0.99  | 0.98  | 0.98  | 0.98   | 0.97   | 0.96   | 0.96   | 0.95   | 0.92  | 0.88  |
| Angola  | G5733     | 1              | 1.00 | 1.00 | 0.99 | 0.99 | 0.98 | 0.98  | 0.97  | 0.95  | 0.94  | 0.92  | 0.87   | 0.80   | 0.73   | 0.66   | 0.59   | 0.42  | 0.27  |
| Angola  | G5740     | 1              | 1.00 | 1.00 | 0.99 | 0.99 | 0.98 | 0.97  | 0.97  | 0.96  | 0.95  | 0.93  | 0.90   | 0.86   | 0.80   | 0.74   | 0.68   | 0.52  | 0.37  |
| Angola  | G5741     | 1              | 1.00 | 1.00 | 0.99 | 0.98 | 0.97 | 0.96  | 0.95  | 0.93  | 0.91  | 0.88  | 0.83   | 0.76   | 0.69   | 0.64   | 0.58   | 0.46  | 0.38  |
| Angola  | G5743     | 1              | 1.00 | 1.00 | 0.99 | 0.99 | 0.98 | 0.97  | 0.97  | 0.96  | 0.95  | 0.93  | 0.90   | 0.86   | 0.80   | 0.74   | 0.68   | 0.53  | 0.38  |
| Benin   | G1042     | 1              | 1.00 | 0.99 | 0.97 | 0.94 | 0.91 | 0.88  | 0.85  | 0.83  | 0.81  | 0.79  | 0.76   | 0.73   | 0.72   | 0.72   | 0.72   | 0.72  | 0.69  |
| Benin   | G1044     | 1              | 0.98 | 0.89 | 0.77 | 0.64 | 0.50 | 0.36  | 0.26  | 0.22  | 0.14  | 0.10  | 0.04   | -0.01  | -0.05  | -0.04  | -0.03  | -0.03 | -0.04 |

| Country  | GloFAS ID | Station filter | LT1  | LT2  | LT3  | LT4  | LT5  | LT6  | LT7  | LT8  | LT9  | LT10 | LT12 | LT14  | LT16  | LT18  | LT20  | LT25  | L30   |
|----------|-----------|----------------|------|------|------|------|------|------|------|------|------|------|------|-------|-------|-------|-------|-------|-------|
| Benin    | G1062     | 1              | 1.00 | 0.96 | 0.91 | 0.84 | 0.73 | 0.62 | 0.55 | 0.46 | 0.36 | 0.27 | 0.14 | 0.05  | -0.02 | -0.07 | -0.09 | -0.11 | -0.17 |
| Benin    | G1070     | 1              | 0.97 | 0.88 | 0.77 | 0.66 | 0.55 | 0.47 | 0.41 | 0.37 | 0.32 | 0.29 | 0.24 | 0.20  | 0.17  | 0.15  | 0.14  | 0.10  | 0.07  |
| Benin    | G1081     | 1              | 0.99 | 0.97 | 0.92 | 0.87 | 0.81 | 0.74 | 0.66 | 0.59 | 0.52 | 0.46 | 0.38 | 0.31  | 0.25  | 0.21  | 0.18  | 0.09  | 0.06  |
| Benin    | G1087     | 1              | 1.00 | 0.99 | 0.98 | 0.95 | 0.91 | 0.86 | 0.81 | 0.76 | 0.69 | 0.63 | 0.51 | 0.42  | 0.35  | 0.28  | 0.22  | 0.16  | 0.09  |
| Benin    | G1090     | 1              | 1.00 | 0.99 | 0.98 | 0.96 | 0.92 | 0.88 | 0.83 | 0.78 | 0.72 | 0.66 | 0.54 | 0.45  | 0.37  | 0.30  | 0.24  | 0.15  | 0.08  |
| Benin    | G4943     | 1              | 0.97 | 0.91 | 0.82 | 0.68 | 0.56 | 0.43 | 0.32 | 0.24 | 0.16 | 0.10 | 0.01 | -0.05 | -0.08 | -0.09 | -0.08 | -0.06 | -0.06 |
| Botswana | G1382     | 1              | 1.00 | 1.00 | 0.99 | 0.99 | 0.99 | 0.99 | 0.99 | 0.98 | 0.98 | 0.98 | 0.97 | 0.96  | 0.94  | 0.91  | 0.88  | 0.75  | 0.62  |
| Botswana | G1387     | 1              | 1.00 | 1.00 | 1.00 | 0.99 | 0.99 | 0.99 | 0.98 | 0.97 | 0.96 | 0.95 | 0.92 | 0.89  | 0.84  | 0.78  | 0.72  | 0.59  | 0.46  |
| Botswana | G1398     | 1              | 0.99 | 0.99 | 0.99 | 0.99 | 0.98 | 0.98 | 0.98 | 0.98 | 0.97 | 0.97 | 0.96 | 0.95  | 0.94  | 0.91  | 0.88  | 0.76  | 0.63  |
| Botswana | G1399     | 1              | 1.00 | 0.99 | 0.99 | 0.99 | 0.99 | 0.99 | 0.98 | 0.98 | 0.98 | 0.97 | 0.97 | 0.96  | 0.94  | 0.92  | 0.89  | 0.77  | 0.64  |
| Botswana | G1400     | 1              | 1.00 | 1.00 | 1.00 | 1.00 | 1.00 | 1.00 | 0.99 | 0.99 | 0.98 | 0.97 | 0.96 | 0.94  | 0.92  | 0.89  | 0.86  | 0.81  | 0.77  |
| Botswana | G1403     | 1              | 1.00 | 0.99 | 0.99 | 0.99 | 0.99 | 0.98 | 0.98 | 0.98 | 0.98 | 0.97 | 0.97 | 0.95  | 0.94  | 0.91  | 0.88  | 0.76  | 0.63  |
| Botswana | G1405     | 1              | 1.00 | 1.00 | 1.00 | 1.00 | 1.00 | 0.99 | 0.99 | 0.99 | 0.99 | 0.99 | 0.98 | 0.97  | 0.97  | 0.95  | 0.93  | 0.84  | 0.71  |
| Botswana | G1413     | 1              | 0.97 | 0.93 | 0.85 | 0.73 | 0.66 | 0.64 | 0.54 | 0.49 | 0.46 | 0.42 | 0.27 | 0.17  | 0.16  | 0.13  | 0.14  | 0.16  | 0.11  |
| Botswana | G1414     | 1              | 0.91 | 0.83 | 0.72 | 0.64 | 0.59 | 0.53 | 0.44 | 0.40 | 0.35 | 0.28 | 0.19 | 0.13  | 0.12  | 0.11  | 0.10  | 0.08  | 0.08  |
| Botswana | G1793     | 1              | 1.00 | 1.00 | 1.00 | 0.99 | 0.99 | 0.99 | 0.99 | 0.98 | 0.98 | 0.97 | 0.95 | 0.92  | 0.88  | 0.83  | 0.78  | 0.64  | 0.51  |
| Botswana | G5742     | 1              | 1.00 | 1.00 | 1.00 | 1.00 | 0.99 | 0.99 | 0.99 | 0.99 | 0.98 | 0.98 | 0.97 | 0.96  | 0.94  | 0.93  | 0.92  | 0.89  | 0.85  |
| Botswana | G5759     | 1              | 1.00 | 1.00 | 1.00 | 1.00 | 0.99 | 0.99 | 0.99 | 0.98 | 0.98 | 0.97 | 0.96 | 0.95  | 0.94  | 0.93  | 0.92  | 0.88  | 0.84  |
| Botswana | G5764     | 1              | 1.00 | 0.99 | 0.98 | 0.96 | 0.95 | 0.93 | 0.91 | 0.89 | 0.87 | 0.84 | 0.79 | 0.73  | 0.68  | 0.62  | 0.57  | 0.47  | 0.40  |
| Botswana | G5775     | 1              | 1.00 | 0.99 | 0.96 | 0.93 | 0.91 | 0.88 | 0.86 | 0.84 | 0.82 | 0.79 | 0.74 | 0.68  | 0.65  | 0.60  | 0.56  | 0.49  | 0.44  |
| Botswana | G5798     | 1              | 1.00 | 1.00 | 0.99 | 0.98 | 0.97 | 0.96 | 0.95 | 0.94 | 0.93 | 0.92 | 0.90 | 0.88  | 0.86  | 0.83  | 0.81  | 0.76  | 0.71  |
| Botswana | G5800     | 1              | 1.00 | 1.00 | 1.00 | 0.99 | 0.98 | 0.97 | 0.95 | 0.93 | 0.91 | 0.89 | 0.84 | 0.78  | 0.73  | 0.68  | 0.66  | 0.65  | 0.63  |
| Botswana | G5802     | 1              | 1.00 | 1.00 | 1.00 | 1.00 | 0.99 | 0.99 | 0.98 | 0.97 | 0.96 | 0.95 | 0.91 | 0.88  | 0.84  | 0.81  | 0.78  | 0.74  | 0.70  |
| Botswana | G5807     | 1              | 1.00 | 1.00 | 0.99 | 0.98 | 0.97 | 0.96 | 0.94 | 0.92 | 0.91 | 0.89 | 0.84 | 0.79  | 0.73  | 0.67  | 0.64  | 0.57  | 0.53  |
| Botswana | G5808     | 1              | 1.00 | 1.00 | 1.00 | 0.99 | 0.99 | 0.98 | 0.97 | 0.96 | 0.95 | 0.94 | 0.91 | 0.87  | 0.83  | 0.79  | 0.75  | 0.69  | 0.63  |
| Botswana | G5809     | 1              | 1.00 | 1.00 | 0.99 | 0.97 | 0.95 | 0.92 | 0.90 | 0.88 | 0.86 | 0.83 | 0.80 | 0.76  | 0.72  | 0.70  | 0.68  | 0.64  | 0.59  |
| Botswana | G5810     | 1              | 1.00 | 1.00 | 1.00 | 1.00 | 1.00 | 0.99 | 0.99 | 0.98 | 0.98 | 0.97 | 0.94 | 0.91  | 0.87  | 0.83  | 0.80  | 0.74  | 0.70  |
| Botswana | G5821     | 1              | 0.98 | 0.95 | 0.92 | 0.88 | 0.83 | 0.79 | 0.75 | 0.68 | 0.63 | 0.58 | 0.48 | 0.41  | 0.34  | 0.31  | 0.26  | 0.21  | 0.15  |
| Botswana | G5826     | 1              | 1.00 | 1.00 | 0.99 | 0.99 | 0.99 | 0.99 | 0.99 | 0.99 | 0.99 | 0.98 | 0.98 | 0.97  | 0.97  | 0.95  | 0.94  | 0.87  | 0.75  |
| Botswana | G5827     | 1              | 0.97 | 0.93 | 0.91 | 0.87 | 0.84 | 0.80 | 0.76 | 0.73 | 0.68 | 0.63 | 0.52 | 0.42  | 0.33  | 0.27  | 0.22  | 0.15  | 0.12  |
| Botswana | G5835     | 1              | 1.00 | 0.99 | 0.99 | 0.99 | 0.98 | 0.98 | 0.98 | 0.97 | 0.97 | 0.97 | 0.96 | 0.95  | 0.94  | 0.93  | 0.92  | 0.86  | 0.74  |
| Botswana | G5845     | 1              | 1.00 | 1.00 | 1.00 | 1.00 | 1.00 | 0.99 | 0.99 | 0.99 | 0.99 | 0.99 | 0.98 | 0.98  | 0.97  | 0.95  | 0.93  | 0.85  | 0.72  |
| Botswana | G5846     | 1              | 1.00 | 0.99 | 0.98 | 0.98 | 0.97 | 0.96 | 0.96 | 0.96 | 0.95 | 0.95 | 0.94 | 0.93  | 0.92  | 0.92  | 0.91  | 0.89  | 0.87  |
| Botswana | G5856     | 1              | 0.99 | 0.97 | 0.93 | 0.87 | 0.86 | 0.81 | 0.73 | 0.66 | 0.63 | 0.59 | 0.46 | 0.37  | 0.32  | 0.28  | 0.25  | 0.19  | 0.14  |
| Botswana | G5857     | 1              | 1.00 | 1.00 | 1.00 | 1.00 | 1.00 | 1.00 | 1.00 | 1.00 | 1.00 | 0.99 | 0.99 | 0.99  | 0.98  | 0.98  | 0.97  | 0.94  | 0.90  |
| Botswana | G5858     | 1              | 1.00 | 1.00 | 1.00 | 1.00 | 1.00 | 0.99 | 0.99 | 0.99 | 0.98 | 0.98 | 0.96 | 0.94  | 0.92  | 0.90  | 0.88  | 0.82  | 0.77  |
| Botswana | G5859     | 1              | 1.00 | 1.00 | 1.00 | 1.00 | 0.99 | 0.99 | 0.99 | 0.99 | 0.98 | 0.98 | 0.96 | 0.95  | 0.93  | 0.90  | 0.87  | 0.78  | 0.69  |
| Botswana | G5860     | 1              | 0.99 | 0.98 | 0.94 | 0.89 | 0.87 | 0.82 | 0.74 | 0.68 | 0.65 | 0.61 | 0.50 | 0.41  | 0.36  | 0.30  | 0.27  | 0.21  | 0.16  |
| Botswana | G5861     | 1              | 1.00 | 1.00 | 1.00 | 0.99 | 0.99 | 0.99 | 0.99 | 0.98 | 0.98 | 0.98 | 0.97 | 0.95  | 0.94  | 0.92  | 0.91  | 0.87  | 0.83  |

| Country                  | GloFAS ID | Station filter | LT1  | LT2  | LT3  | LT4  | LT5  | LT6  | LT7  | LT8  | LT9   | LT10  | LT12  | LT14  | LT16  | LT18  | LT20  | LT25  | L30   |
|--------------------------|-----------|----------------|------|------|------|------|------|------|------|------|-------|-------|-------|-------|-------|-------|-------|-------|-------|
| Botswana                 | G5874     | 1              | 1.00 | 0.99 | 0.98 | 0.97 | 0.96 | 0.95 | 0.94 | 0.93 | 0.91  | 0.89  | 0.87  | 0.83  | 0.78  | 0.73  | 0.67  | 0.50  | 0.36  |
| Botswana                 | G5880     | 1              | 1.00 | 1.00 | 0.99 | 0.99 | 0.99 | 0.98 | 0.98 | 0.97 | 0.97  | 0.96  | 0.93  | 0.88  | 0.83  | 0.78  | 0.73  | 0.62  | 0.53  |
| Botswana                 | G5892     | 1              | 0.99 | 0.95 | 0.88 | 0.74 | 0.69 | 0.66 | 0.63 | 0.56 | 0.52  | 0.48  | 0.38  | 0.29  | 0.24  | 0.24  | 0.24  | 0.22  | 0.18  |
| Botswana                 | G5894     | 1              | 1.00 | 0.97 | 0.94 | 0.89 | 0.83 | 0.78 | 0.75 | 0.71 | 0.65  | 0.61  | 0.55  | 0.45  | 0.36  | 0.30  | 0.25  | 0.19  | 0.13  |
| Botswana                 | G5898     | 1              | 0.99 | 0.95 | 0.90 | 0.76 | 0.64 | 0.60 | 0.57 | 0.48 | 0.42  | 0.42  | 0.34  | 0.29  | 0.21  | 0.21  | 0.20  | 0.20  | 0.16  |
| Botswana                 | G5911     | 1              | 1.00 | 1.00 | 0.99 | 0.99 | 0.99 | 0.98 | 0.98 | 0.97 | 0.96  | 0.95  | 0.92  | 0.89  | 0.85  | 0.81  | 0.78  | 0.69  | 0.62  |
| Botswana                 | G5914     | 1              | 1.00 | 1.00 | 1.00 | 0.99 | 0.99 | 0.98 | 0.95 | 0.90 | 0.88  | 0.84  | 0.73  | 0.67  | 0.58  | 0.52  | 0.48  | 0.34  | 0.28  |
| Botswana                 | G5919     | 1              | 1.00 | 1.00 | 1.00 | 0.99 | 0.99 | 0.98 | 0.98 | 0.96 | 0.94  | 0.92  | 0.86  | 0.81  | 0.74  | 0.69  | 0.64  | 0.54  | 0.46  |
| Botswana                 | G5936     | 1              | 1.00 | 0.99 | 0.99 | 0.99 | 0.98 | 0.98 | 0.97 | 0.96 | 0.96  | 0.95  | 0.93  | 0.91  | 0.89  | 0.86  | 0.82  | 0.72  | 0.62  |
| Botswana                 | G5938     | 1              | 1.00 | 1.00 | 1.00 | 1.00 | 1.00 | 0.99 | 0.99 | 0.97 | 0.96  | 0.95  | 0.87  | 0.82  | 0.74  | 0.69  | 0.64  | 0.47  | 0.32  |
| Botswana                 | G5939     | 1              | 0.99 | 0.99 | 0.98 | 0.97 | 0.97 | 0.96 | 0.94 | 0.93 | 0.92  | 0.90  | 0.87  | 0.82  | 0.77  | 0.73  | 0.68  | 0.56  | 0.46  |
| Botswana                 | G5943     | 1              | 1.00 | 1.00 | 1.00 | 1.00 | 0.99 | 0.99 | 0.99 | 0.98 | 0.97  | 0.96  | 0.91  | 0.85  | 0.78  | 0.73  | 0.67  | 0.52  | 0.37  |
| Botswana                 | G5944     | 1              | 1.00 | 0.99 | 0.99 | 0.99 | 0.98 | 0.98 | 0.98 | 0.97 | 0.97  | 0.96  | 0.95  | 0.94  | 0.92  | 0.90  | 0.88  | 0.80  | 0.72  |
| Botswana                 | G5945     | 1              | 1.00 | 1.00 | 1.00 | 1.00 | 1.00 | 0.99 | 0.99 | 0.96 | 0.96  | 0.97  | 0.92  | 0.89  | 0.83  | 0.82  | 0.75  | 0.67  | 0.55  |
| Botswana                 | G5955     | 1              | 1.00 | 1.00 | 1.00 | 1.00 | 1.00 | 1.00 | 0.99 | 0.99 | 0.99  | 0.98  | 0.95  | 0.96  | 0.91  | 0.87  | 0.85  | 0.75  | 0.67  |
| Burkina Faso             | G4887     | 1              | 1.00 | 0.99 | 0.97 | 0.91 | 0.78 | 0.62 | 0.48 | 0.35 | 0.24  | 0.12  | -0.13 | -0.37 | -0.52 | -0.61 | -0.64 | -0.59 | -0.58 |
| Burkina Faso             | G4900     | 1              | 0.99 | 0.95 | 0.87 | 0.74 | 0.57 | 0.41 | 0.22 | 0.02 | -0.18 | -0.38 | -0.75 | -1.21 | -1.55 | -1.62 | -1.73 | -1.73 | -1.68 |
| Burkina Faso             | G4915     | 1              | 1.00 | 0.98 | 0.95 | 0.91 | 0.84 | 0.76 | 0.64 | 0.49 | 0.30  | 0.10  | -0.34 | -0.77 | -1.17 | -1.51 | -1.74 | -2.00 | -2.13 |
| Burkina Faso             | G4923     | 1              | 1.00 | 0.99 | 0.98 | 0.95 | 0.91 | 0.85 | 0.79 | 0.73 | 0.66  | 0.59  | 0.43  | 0.27  | 0.09  | -0.09 | -0.23 | -0.52 | -0.76 |
| Cameroon                 | G5004     | 1              | 0.93 | 0.73 | 0.57 | 0.45 | 0.37 | 0.29 | 0.22 | 0.15 | 0.10  | 0.07  | -0.04 | -0.12 | -0.16 | -0.14 | -0.16 | -0.21 | -0.22 |
| Cameroon                 | G5005     | 1              | 0.98 | 0.94 | 0.88 | 0.84 | 0.81 | 0.78 | 0.75 | 0.73 | 0.71  | 0.69  | 0.65  | 0.61  | 0.59  | 0.57  | 0.56  | 0.54  | 0.52  |
| Cameroon                 | G5006     | 1              | 0.93 | 0.79 | 0.65 | 0.54 | 0.45 | 0.39 | 0.34 | 0.28 | 0.24  | 0.18  | 0.09  | 0.04  | -0.01 | -0.04 | -0.02 | 0.01  | 0.03  |
| Cameroon                 | G5011     | 1              | 0.99 | 0.98 | 0.97 | 0.97 | 0.96 | 0.96 | 0.95 | 0.94 | 0.94  | 0.93  | 0.91  | 0.89  | 0.88  | 0.86  | 0.84  | 0.79  | 0.74  |
| Cameroon                 | G5031     | 1              | 0.89 | 0.72 | 0.59 | 0.51 | 0.47 | 0.42 | 0.38 | 0.35 | 0.32  | 0.29  | 0.23  | 0.21  | 0.19  | 0.16  | 0.13  | 0.06  | 0.01  |
| Cameroon                 | G5120     | 1              | 0.99 | 0.96 | 0.92 | 0.89 | 0.87 | 0.84 | 0.81 | 0.79 | 0.76  | 0.73  | 0.67  | 0.61  | 0.56  | 0.50  | 0.44  | 0.32  | 0.22  |
| Cameroon                 | G5122     | 1              | 0.98 | 0.94 | 0.89 | 0.83 | 0.78 | 0.73 | 0.69 | 0.65 | 0.61  | 0.58  | 0.51  | 0.45  | 0.39  | 0.35  | 0.31  | 0.24  | 0.17  |
| Cameroon                 | G5136     | 1              | 0.99 | 0.96 | 0.90 | 0.82 | 0.74 | 0.66 | 0.59 | 0.54 | 0.48  | 0.42  | 0.33  | 0.24  | 0.17  | 0.11  | 0.05  | -0.06 | -0.11 |
| Cameroon                 | G5137     | 1              | 0.99 | 0.95 | 0.90 | 0.82 | 0.71 | 0.59 | 0.47 | 0.34 | 0.21  | 0.08  | -0.15 | -0.30 | -0.40 | -0.48 | -0.51 | -0.52 | -0.50 |
| Cameroon                 | G5180     | 1              | 1.00 | 0.97 | 0.93 | 0.88 | 0.82 | 0.76 | 0.72 | 0.67 | 0.63  | 0.60  | 0.55  | 0.51  | 0.48  | 0.46  | 0.46  | 0.47  | 0.48  |
| Cameroon                 | G5184     | 1              | 0.99 | 0.95 | 0.91 | 0.87 | 0.83 | 0.80 | 0.76 | 0.73 | 0.69  | 0.64  | 0.54  | 0.42  | 0.31  | 0.21  | 0.13  | 0.03  | 0.05  |
| Central African Republic | G1086     | 1              | 1.00 | 0.99 | 0.97 | 0.95 | 0.92 | 0.88 | 0.83 | 0.79 | 0.74  | 0.70  | 0.63  | 0.56  | 0.51  | 0.47  | 0.44  | 0.39  | 0.34  |
| Central African Republic | G1092     | 1              | 0.99 | 0.96 | 0.92 | 0.86 | 0.81 | 0.76 | 0.71 | 0.67 | 0.63  | 0.60  | 0.54  | 0.50  | 0.46  | 0.42  | 0.36  | 0.25  | 0.19  |
| Central African Republic | G1093     | 1              | 1.00 | 0.98 | 0.94 | 0.89 | 0.84 | 0.79 | 0.74 | 0.70 | 0.66  | 0.63  | 0.57  | 0.52  | 0.49  | 0.45  | 0.41  | 0.33  | 0.28  |
| Central African Republic | G1109     | 1              | 0.95 | 0.88 | 0.82 | 0.76 | 0.72 | 0.69 | 0.65 | 0.63 | 0.60  | 0.58  | 0.54  | 0.51  | 0.51  | 0.52  | 0.54  | 0.55  | 0.56  |
| Central African Republic | G1111     | 1              | 0.92 | 0.85 | 0.79 | 0.74 | 0.69 | 0.66 | 0.62 | 0.60 | 0.57  | 0.55  | 0.51  | 0.49  | 0.50  | 0.53  | 0.54  | 0.55  | 0.55  |
| Central African Republic | G1112     | 1              | 0.97 | 0.90 | 0.84 | 0.78 | 0.73 | 0.69 | 0.65 | 0.62 | 0.59  | 0.56  | 0.51  | 0.49  | 0.47  | 0.49  | 0.51  | 0.52  | 0.53  |
| Central African Republic | G1113     | 1              | 0.99 | 0.98 | 0.97 | 0.95 | 0.93 | 0.91 | 0.88 | 0.86 | 0.83  | 0.79  | 0.71  | 0.64  | 0.57  | 0.52  | 0.47  | 0.41  | 0.39  |
| Central African Republic | G1115     | 1              | 0.99 | 0.97 | 0.93 | 0.88 | 0.84 | 0.79 | 0.76 | 0.73 | 0.70  | 0.68  | 0.64  | 0.61  | 0.59  | 0.59  | 0.60  | 0.60  | 0.59  |
| Central African Republic | G1117     | 1              | 1.00 | 0.99 | 0.98 | 0.97 | 0.96 | 0.94 | 0.93 | 0.92 | 0.91  | 0.90  | 0.88  | 0.87  | 0.86  | 0.85  | 0.84  | 0.81  | 0.77  |

| Country                  | GloFAS ID | Station filter | LT1  | LT2  | LT3  | LT4  | LT5  | LT6  | LT7  | LT8  | LT9  | LT10 | LT12 | LT14 | LT16 | LT18 | LT20 | LT25  | L30   |
|--------------------------|-----------|----------------|------|------|------|------|------|------|------|------|------|------|------|------|------|------|------|-------|-------|
| Central African Republic | G1122     | 1              | 1.00 | 0.99 | 0.97 | 0.95 | 0.93 | 0.90 | 0.87 | 0.84 | 0.81 | 0.78 | 0.72 | 0.67 | 0.63 | 0.60 | 0.57 | 0.54  | 0.51  |
| Central African Republic | G4984     | 1              | 0.99 | 0.98 | 0.96 | 0.92 | 0.88 | 0.83 | 0.76 | 0.68 | 0.61 | 0.52 | 0.36 | 0.25 | 0.17 | 0.10 | 0.08 | 0.09  | 0.08  |
| Central African Republic | G4991     | 1              | 0.99 | 0.96 | 0.90 | 0.82 | 0.72 | 0.63 | 0.53 | 0.43 | 0.35 | 0.26 | 0.14 | 0.06 | 0.02 | 0.01 | 0.01 | -0.01 | -0.04 |
| Central African Republic | G5034     | 1              | 0.99 | 0.95 | 0.90 | 0.82 | 0.74 | 0.65 | 0.56 | 0.49 | 0.41 | 0.35 | 0.24 | 0.17 | 0.11 | 0.08 | 0.07 | 0.05  | 0.02  |
| Central African Republic | G5040     | 1              | 1.00 | 0.98 | 0.96 | 0.92 | 0.88 | 0.83 | 0.77 | 0.71 | 0.66 | 0.60 | 0.51 | 0.42 | 0.36 | 0.32 | 0.30 | 0.27  | 0.25  |
| Central African Republic | G5042     | 1              | 0.99 | 0.98 | 0.95 | 0.91 | 0.85 | 0.80 | 0.74 | 0.68 | 0.63 | 0.58 | 0.50 | 0.43 | 0.38 | 0.35 | 0.33 | 0.31  | 0.29  |
| Central African Republic | G5043     | 1              | 1.00 | 0.99 | 0.97 | 0.94 | 0.90 | 0.86 | 0.81 | 0.75 | 0.70 | 0.64 | 0.54 | 0.45 | 0.39 | 0.34 | 0.31 | 0.27  | 0.24  |
| Central African Republic | G5090     | 1              | 0.98 | 0.96 | 0.94 | 0.93 | 0.92 | 0.92 | 0.91 | 0.91 | 0.90 | 0.90 | 0.88 | 0.87 | 0.86 | 0.85 | 0.83 | 0.79  | 0.74  |
| Central African Republic | G5091     | 1              | 0.97 | 0.94 | 0.90 | 0.87 | 0.85 | 0.82 | 0.81 | 0.79 | 0.77 | 0.76 | 0.75 | 0.73 | 0.72 | 0.73 | 0.73 | 0.71  | 0.68  |
| Central African Republic | G5114     | 1              | 0.95 | 0.89 | 0.83 | 0.79 | 0.75 | 0.71 | 0.69 | 0.67 | 0.64 | 0.62 | 0.59 | 0.56 | 0.56 | 0.57 | 0.58 | 0.58  | 0.59  |
| Central African Republic | G5117     | 1              | 0.96 | 0.90 | 0.84 | 0.79 | 0.74 | 0.69 | 0.66 | 0.62 | 0.59 | 0.57 | 0.53 | 0.50 | 0.49 | 0.49 | 0.50 | 0.48  | 0.48  |
| Central African Republic | G5124     | 1              | 0.95 | 0.87 | 0.81 | 0.75 | 0.71 | 0.66 | 0.63 | 0.61 | 0.58 | 0.56 | 0.52 | 0.49 | 0.46 | 0.47 | 0.47 | 0.47  | 0.45  |
| Central African Republic | G5125     | 1              | 0.94 | 0.86 | 0.79 | 0.72 | 0.67 | 0.63 | 0.59 | 0.56 | 0.52 | 0.50 | 0.46 | 0.44 | 0.44 | 0.48 | 0.51 | 0.54  | 0.55  |
| Central African Republic | G5126     | 1              | 0.99 | 0.96 | 0.92 | 0.88 | 0.83 | 0.79 | 0.76 | 0.73 | 0.71 | 0.68 | 0.65 | 0.62 | 0.60 | 0.60 | 0.60 | 0.60  | 0.59  |
| Central African Republic | G5127     | 1              | 0.96 | 0.90 | 0.85 | 0.81 | 0.76 | 0.73 | 0.69 | 0.67 | 0.65 | 0.62 | 0.59 | 0.56 | 0.54 | 0.53 | 0.54 | 0.53  | 0.51  |
| Central African Republic | G5128     | 1              | 0.95 | 0.87 | 0.81 | 0.75 | 0.70 | 0.68 | 0.64 | 0.62 | 0.59 | 0.57 | 0.52 | 0.50 | 0.49 | 0.51 | 0.52 | 0.54  | 0.54  |
| Central African Republic | G5131     | 1              | 0.99 | 0.97 | 0.92 | 0.88 | 0.83 | 0.79 | 0.76 | 0.73 | 0.71 | 0.69 | 0.65 | 0.63 | 0.61 | 0.61 | 0.61 | 0.61  | 0.60  |
| Central African Republic | G5132     | 1              | 0.96 | 0.90 | 0.84 | 0.78 | 0.74 | 0.70 | 0.66 | 0.63 | 0.60 | 0.57 | 0.53 | 0.50 | 0.49 | 0.50 | 0.51 | 0.51  | 0.51  |
| Central African Republic | G5135     | 1              | 0.97 | 0.90 | 0.83 | 0.77 | 0.71 | 0.67 | 0.64 | 0.61 | 0.58 | 0.55 | 0.50 | 0.48 | 0.47 | 0.49 | 0.51 | 0.54  | 0.54  |
| Central African Republic | G5139     | 1              | 1.00 | 0.99 | 0.98 | 0.96 | 0.94 | 0.92 | 0.89 | 0.86 | 0.82 | 0.79 | 0.71 | 0.64 | 0.58 | 0.52 | 0.48 | 0.43  | 0.41  |
| Central African Republic | G5140     | 1              | 0.99 | 0.96 | 0.94 | 0.92 | 0.90 | 0.87 | 0.86 | 0.85 | 0.83 | 0.82 | 0.80 | 0.78 | 0.77 | 0.77 | 0.76 | 0.74  | 0.71  |
| Central African Republic | G5146     | 1              | 0.98 | 0.94 | 0.88 | 0.83 | 0.78 | 0.74 | 0.71 | 0.68 | 0.66 | 0.64 | 0.60 | 0.58 | 0.56 | 0.57 | 0.57 | 0.57  | 0.56  |
| Central African Republic | G5158     | 1              | 1.00 | 1.00 | 0.98 | 0.96 | 0.93 | 0.89 | 0.85 | 0.81 | 0.77 | 0.74 | 0.69 | 0.65 | 0.61 | 0.59 | 0.59 | 0.59  | 0.59  |
| Chad                     | G1038     | 1              | 1.00 | 1.00 | 0.99 | 0.99 | 0.98 | 0.98 | 0.96 | 0.95 | 0.93 | 0.90 | 0.84 | 0.74 | 0.64 | 0.53 | 0.44 | 0.28  | 0.19  |
| Chad                     | G1039     | 1              | 1.00 | 1.00 | 0.99 | 0.99 | 0.98 | 0.98 | 0.96 | 0.95 | 0.93 | 0.90 | 0.84 | 0.74 | 0.64 | 0.53 | 0.44 | 0.28  | 0.19  |
| Chad                     | G1047     | 1              | 1.00 | 1.00 | 1.00 | 0.99 | 0.99 | 0.98 | 0.97 | 0.96 | 0.94 | 0.91 | 0.83 | 0.73 | 0.61 | 0.51 | 0.42 | 0.29  | 0.23  |
| Chad                     | G1060     | 1              | 0.99 | 0.98 | 0.96 | 0.94 | 0.92 | 0.88 | 0.83 | 0.77 | 0.72 | 0.66 | 0.57 | 0.49 | 0.42 | 0.35 | 0.29 | 0.14  | 0.01  |
| Chad                     | G1066     | 1              | 0.99 | 0.98 | 0.96 | 0.93 | 0.88 | 0.82 | 0.76 | 0.70 | 0.65 | 0.60 | 0.52 | 0.44 | 0.37 | 0.31 | 0.25 | 0.11  | -0.01 |
| Chad                     | G1072     | 1              | 1.00 | 0.99 | 0.98 | 0.95 | 0.92 | 0.87 | 0.82 | 0.76 | 0.69 | 0.63 | 0.51 | 0.40 | 0.31 | 0.24 | 0.20 | 0.18  | 0.17  |
| Chad                     | G1073     | 1              | 1.00 | 0.99 | 0.98 | 0.96 | 0.94 | 0.91 | 0.87 | 0.83 | 0.78 | 0.74 | 0.64 | 0.55 | 0.48 | 0.42 | 0.36 | 0.29  | 0.23  |
| Chad                     | G1744     | 1              | 0.99 | 0.97 | 0.95 | 0.92 | 0.88 | 0.83 | 0.77 | 0.71 | 0.66 | 0.61 | 0.52 | 0.45 | 0.37 | 0.31 | 0.25 | 0.11  | -0.01 |
| Chad                     | G1745     | 1              | 1.00 | 0.99 | 0.99 | 0.97 | 0.95 | 0.92 | 0.88 | 0.83 | 0.77 | 0.71 | 0.59 | 0.48 | 0.38 | 0.30 | 0.24 | 0.18  | 0.16  |
| Chad                     | G4727     | 0              | 1.00 | 1.00 | 1.00 | 1.00 | 1.00 | 0.99 | 0.99 | 0.99 | 0.99 | 0.99 | 1.00 | 1.00 | 1.00 | 1.00 | 1.00 | 0.87  | 0.90  |
| Chad                     | G4728     | 0              | -    | -    | -    | -    | -    | -    | -    | -    | -    | -    | -    | -    | -    | -    | -    | -     | -     |
| Chad                     | G4800     | 0              | -    | -    | -    | -    | -    | -    | -    | -    | -    | -    | -    | -    | -    | -    | -    | -     | -     |
| Chad                     | G4801     | 1              | 1.00 | 1.00 | 1.00 | 1.00 | 0.99 | 0.99 | 0.99 | 0.99 | 0.99 | 0.95 | 0.93 | 0.94 | 0.94 | 0.93 | 0.88 | 0.54  | 0.47  |
| Chad                     | G4811     | 1              | 1.00 | 1.00 | 1.00 | 1.00 | 1.00 | 1.00 | 0.99 | 0.99 | 0.93 | 0.91 | 0.85 | 0.80 | 0.68 | 0.57 | 0.49 | 0.36  | 0.05  |
| Chad                     | G4827     | 1              | 1.00 | 1.00 | 1.00 | 1.00 | 1.00 | 0.99 | 0.99 | 0.99 | 0.97 | 0.91 | 0.87 | 0.83 | 0.72 | 0.46 | 0.42 | 0.09  | -0.29 |
| Chad                     | G4831     | 0              | -    | -    | -    | -    | -    | -    | -    | -    | -    | -    | -    | -    | -    | -    | -    | -     | -     |

| Country | GloFAS ID | Station filter | LT1  | LT2  | LT3  | LT4  | LT5  | LT6  | LT7  | LT8   | LT9   | LT10  | LT12  | LT14  | LT16  | LT18  | LT20  | LT25  | L30    |
|---------|-----------|----------------|------|------|------|------|------|------|------|-------|-------|-------|-------|-------|-------|-------|-------|-------|--------|
| Chad    | G4832     | 1              | 1.00 | 0.99 | 0.98 | 0.97 | 0.97 | 0.96 | 0.80 | -0.46 | -0.73 | -0.23 | -0.32 | -1.20 | -1.39 | -1.34 | -1.44 | -2.74 | -13.76 |
| Chad    | G4833     | 1              | 1.00 | 1.00 | 1.00 | 0.98 | 0.95 | 0.87 | 0.86 | 0.81  | 0.79  | 0.80  | 0.68  | 0.38  | 0.12  | -0.26 | -0.65 | -1.17 | -1.93  |
| Chad    | G4834     | 1              | 1.00 | 1.00 | 1.00 | 1.00 | 1.00 | 1.00 | 0.99 | 0.98  | 0.97  | 0.96  | 0.89  | 0.84  | 0.73  | 0.65  | 0.53  | 0.30  | 0.00   |
| Chad    | G4835     | 1              | 1.00 | 1.00 | 1.00 | 1.00 | 1.00 | 1.00 | 1.00 | 0.99  | 0.98  | 0.93  | 0.90  | 0.87  | 0.79  | 0.61  | 0.52  | 0.24  | 0.09   |
| Chad    | G4836     | 1              | 1.00 | 1.00 | 1.00 | 1.00 | 1.00 | 1.00 | 1.00 | 0.99  | 0.97  | 0.93  | 0.90  | 0.87  | 0.79  | 0.67  | 0.61  | 0.42  | 0.31   |
| Chad    | G4839     | 1              | 1.00 | 0.99 | 0.99 | 0.99 | 0.98 | 0.98 | 0.98 | 0.98  | 0.95  | 0.92  | 0.70  | 0.64  | 0.64  | 0.35  | 0.28  | 0.37  | -5.80  |
| Chad    | G4840     | 1              | 1.00 | 1.00 | 1.00 | 0.98 | 0.94 | 0.86 | 0.86 | 0.87  | 0.87  | 0.85  | 0.72  | 0.44  | 0.22  | -0.14 | -0.57 | -1.06 | -1.29  |
| Chad    | G4841     | 1              | 1.00 | 1.00 | 1.00 | 1.00 | 1.00 | 1.00 | 0.99 | 0.97  | 0.97  | 0.96  | 0.89  | 0.84  | 0.73  | 0.64  | 0.53  | 0.31  | -0.01  |
| Chad    | G4843     | 0              | -    | -    | -    | -    | -    | -    | -    | -     | -     | -     | -     | -     | -     | -     | -     | -     | -      |
| Chad    | G4846     | 1              | 1.00 | 0.99 | 0.95 | 0.93 | 0.93 | 0.93 | 0.91 | 0.84  | 0.80  | 0.70  | 0.41  | 0.04  | -0.17 | -0.31 | -0.99 | -0.98 | -1.56  |
| Chad    | G4852     | 0              | -    | -    | -    | -    | -    | -    | -    | -     | -     | -     | -     | -     | -     | -     | -     | -     | -      |
| Chad    | G4853     | 1              | 1.00 | 0.99 | 0.94 | 0.93 | 0.94 | 0.94 | 0.90 | 0.85  | 0.79  | 0.67  | 0.41  | 0.09  | -0.07 | -0.18 | -0.79 | -0.73 | -1.25  |
| Chad    | G4866     | 1              | 1.00 | 1.00 | 1.00 | 1.00 | 0.99 | 0.99 | 0.97 | 0.97  | 0.95  | 0.92  | 0.86  | 0.78  | 0.67  | 0.56  | 0.46  | 0.22  | -0.14  |
| Chad    | G4867     | 1              | 1.00 | 1.00 | 1.00 | 1.00 | 0.99 | 0.98 | 0.97 | 0.95  | 0.93  | 0.91  | 0.85  | 0.76  | 0.69  | 0.64  | 0.54  | 0.28  | -0.03  |
| Chad    | G4868     | 1              | 1.00 | 1.00 | 1.00 | 1.00 | 0.99 | 0.99 | 0.98 | 0.97  | 0.95  | 0.92  | 0.86  | 0.78  | 0.67  | 0.56  | 0.46  | 0.23  | -0.10  |
| Chad    | G4869     | 1              | 1.00 | 1.00 | 1.00 | 1.00 | 0.99 | 0.97 | 0.96 | 0.95  | 0.93  | 0.91  | 0.82  | 0.73  | 0.65  | 0.53  | 0.45  | 0.18  | -0.17  |
| Chad    | G4874     | 1              | 1.00 | 1.00 | 1.00 | 1.00 | 0.99 | 0.98 | 0.97 | 0.95  | 0.92  | 0.88  | 0.81  | 0.72  | 0.61  | 0.49  | 0.39  | 0.17  | -0.12  |
| Chad    | G4875     | 1              | 1.00 | 1.00 | 0.99 | 0.99 | 0.98 | 0.97 | 0.96 | 0.95  | 0.94  | 0.93  | 0.89  | 0.83  | 0.76  | 0.68  | 0.58  | 0.27  | -0.14  |
| Chad    | G4882     | 1              | 1.00 | 1.00 | 0.99 | 0.99 | 0.98 | 0.97 | 0.96 | 0.95  | 0.93  | 0.91  | 0.84  | 0.74  | 0.65  | 0.55  | 0.43  | 0.12  | -0.25  |
| Chad    | G4884     | 1              | 0.99 | 0.97 | 0.98 | 0.96 | 0.91 | 0.89 | 0.86 | 0.80  | 0.71  | 0.66  | 0.48  | 0.33  | 0.16  | 0.03  | -0.07 | -0.34 | -0.62  |
| Chad    | G4885     | 1              | 1.00 | 0.99 | 0.99 | 0.97 | 0.96 | 0.94 | 0.91 | 0.87  | 0.85  | 0.83  | 0.74  | 0.66  | 0.56  | 0.47  | 0.37  | 0.13  | -0.19  |
| Chad    | G4925     | 1              | 0.99 | 0.95 | 0.88 | 0.81 | 0.73 | 0.62 | 0.48 | 0.31  | 0.18  | 0.06  | -0.17 | -0.31 | -0.39 | -0.48 | -0.49 | -0.52 | -0.49  |
| Chad    | G4926     | 1              | 0.98 | 0.97 | 0.96 | 0.94 | 0.90 | 0.85 | 0.79 | 0.69  | 0.58  | 0.43  | 0.13  | -0.19 | -0.46 | -0.67 | -0.80 | -0.91 | -0.85  |
| Chad    | G4928     | 1              | 1.00 | 0.98 | 0.96 | 0.93 | 0.90 | 0.87 | 0.84 | 0.80  | 0.75  | 0.70  | 0.61  | 0.53  | 0.45  | 0.40  | 0.34  | 0.10  | -0.15  |
| Chad    | G4940     | 1              | 0.98 | 0.92 | 0.87 | 0.80 | 0.71 | 0.66 | 0.63 | 0.55  | 0.50  | 0.47  | 0.41  | 0.37  | 0.31  | 0.32  | 0.25  | 0.16  | 0.07   |
| Chad    | G4941     | 1              | 0.96 | 0.87 | 0.74 | 0.59 | 0.44 | 0.35 | 0.29 | 0.23  | 0.21  | 0.20  | 0.15  | 0.14  | 0.12  | 0.08  | 0.06  | 0.01  | -0.03  |
| Chad    | G4961     | 1              | 0.99 | 0.94 | 0.77 | 0.65 | 0.55 | 0.42 | 0.31 | 0.18  | 0.07  | -0.05 | -0.24 | -0.31 | -0.37 | -0.37 | -0.31 | -0.23 | -0.25  |
| Chad    | G4962     | 1              | 0.99 | 0.97 | 0.94 | 0.90 | 0.84 | 0.77 | 0.67 | 0.60  | 0.55  | 0.48  | 0.40  | 0.34  | 0.30  | 0.27  | 0.27  | 0.18  | 0.12   |
| Chad    | G4964     | 1              | 1.00 | 1.00 | 1.00 | 1.00 | 0.99 | 0.98 | 0.97 | 0.95  | 0.92  | 0.88  | 0.78  | 0.67  | 0.56  | 0.46  | 0.38  | 0.27  | 0.22   |
| Chad    | G4967     | 1              | 0.99 | 0.97 | 0.93 | 0.84 | 0.72 | 0.62 | 0.51 | 0.41  | 0.30  | 0.15  | -0.10 | -0.24 | -0.32 | -0.28 | -0.20 | -0.08 | 0.04   |
| Chad    | G5000     | 1              | 0.99 | 0.97 | 0.96 | 0.93 | 0.89 | 0.84 | 0.77 | 0.67  | 0.60  | 0.52  | 0.30  | 0.11  | -0.02 | -0.09 | -0.12 | -0.11 | -0.11  |
| Chad    | G5001     | 1              | 1.00 | 0.98 | 0.96 | 0.92 | 0.87 | 0.81 | 0.73 | 0.65  | 0.57  | 0.50  | 0.35  | 0.25  | 0.17  | 0.13  | 0.12  | 0.09  | 0.06   |
| Chad    | G5012     | 1              | 0.99 | 0.96 | 0.91 | 0.87 | 0.80 | 0.72 | 0.62 | 0.50  | 0.39  | 0.27  | 0.01  | -0.16 | -0.27 | -0.33 | -0.31 | -0.23 | -0.12  |
| Chad    | G5022     | 1              | 1.00 | 0.98 | 0.97 | 0.93 | 0.88 | 0.83 | 0.77 | 0.71  | 0.66  | 0.61  | 0.53  | 0.45  | 0.38  | 0.31  | 0.25  | 0.11  | 0.00   |
| Chad    | G5059     | 1              | 1.00 | 0.99 | 0.97 | 0.95 | 0.93 | 0.89 | 0.85 | 0.81  | 0.76  | 0.72  | 0.64  | 0.56  | 0.50  | 0.45  | 0.41  | 0.34  | 0.29   |
| Congo   | G1180     | 1              | 1.00 | 1.00 | 1.00 | 1.00 | 0.99 | 0.99 | 0.98 | 0.97  | 0.96  | 0.95  | 0.92  | 0.87  | 0.82  | 0.76  | 0.69  | 0.50  | 0.32   |
| Congo   | G1827     | 1              | 0.99 | 0.98 | 0.97 | 0.96 | 0.95 | 0.94 | 0.92 | 0.90  | 0.88  | 0.86  | 0.81  | 0.75  | 0.70  | 0.64  | 0.58  | 0.45  | 0.36   |
| Congo   | G1828     | 1              | 1.00 | 1.00 | 0.99 | 0.98 | 0.96 | 0.94 | 0.92 | 0.90  | 0.87  | 0.85  | 0.78  | 0.73  | 0.66  | 0.60  | 0.54  | 0.41  | 0.33   |
| Congo   | G1891     | 1              | 0.99 | 0.97 | 0.94 | 0.91 | 0.88 | 0.85 | 0.83 | 0.80  | 0.78  | 0.76  | 0.70  | 0.65  | 0.61  | 0.56  | 0.51  | 0.40  | 0.33   |

| Country | GloFAS ID | Station filter | LT1  | LT2  | LT3  | LT4  | LT5  | LT6  | LT7  | LT8  | LT9  | LT10  | LT12  | LT14  | LT16  | LT18  | LT20  | LT25  | L30   |
|---------|-----------|----------------|------|------|------|------|------|------|------|------|------|-------|-------|-------|-------|-------|-------|-------|-------|
| Congo   | G5144     | 1              | 0.97 | 0.91 | 0.85 | 0.79 | 0.74 | 0.69 | 0.66 | 0.62 | 0.59 | 0.56  | 0.52  | 0.49  | 0.47  | 0.50  | 0.51  | 0.53  | 0.53  |
| Congo   | G5147     | 1              | 0.95 | 0.86 | 0.77 | 0.71 | 0.66 | 0.63 | 0.60 | 0.57 | 0.56 | 0.54  | 0.50  | 0.48  | 0.46  | 0.45  | 0.44  | 0.43  | 0.42  |
| Congo   | G5151     | 1              | 0.99 | 0.96 | 0.91 | 0.85 | 0.80 | 0.76 | 0.72 | 0.70 | 0.68 | 0.65  | 0.62  | 0.59  | 0.56  | 0.54  | 0.52  | 0.49  | 0.47  |
| Congo   | G5159     | 1              | 0.98 | 0.93 | 0.87 | 0.81 | 0.77 | 0.74 | 0.71 | 0.69 | 0.67 | 0.65  | 0.62  | 0.58  | 0.55  | 0.53  | 0.50  | 0.46  | 0.41  |
| Congo   | G5160     | 1              | 0.95 | 0.88 | 0.82 | 0.77 | 0.73 | 0.70 | 0.68 | 0.66 | 0.63 | 0.61  | 0.57  | 0.55  | 0.52  | 0.50  | 0.47  | 0.42  | 0.36  |
| Congo   | G5162     | 1              | 0.95 | 0.88 | 0.81 | 0.76 | 0.72 | 0.69 | 0.65 | 0.63 | 0.61 | 0.58  | 0.54  | 0.51  | 0.50  | 0.50  | 0.51  | 0.51  | 0.52  |
| Congo   | G5164     | 1              | 0.99 | 0.94 | 0.88 | 0.82 | 0.78 | 0.74 | 0.71 | 0.69 | 0.67 | 0.65  | 0.61  | 0.58  | 0.55  | 0.53  | 0.50  | 0.46  | 0.42  |
| Congo   | G5165     | 1              | 0.95 | 0.87 | 0.80 | 0.74 | 0.70 | 0.66 | 0.63 | 0.61 | 0.59 | 0.56  | 0.52  | 0.48  | 0.46  | 0.43  | 0.41  | 0.38  | 0.35  |
| Congo   | G5166     | 1              | 0.93 | 0.84 | 0.78 | 0.73 | 0.68 | 0.65 | 0.63 | 0.60 | 0.57 | 0.55  | 0.51  | 0.46  | 0.42  | 0.38  | 0.34  | 0.27  | 0.20  |
| Congo   | G5172     | 1              | 1.00 | 1.00 | 1.00 | 0.99 | 0.97 | 0.94 | 0.91 | 0.88 | 0.84 | 0.80  | 0.74  | 0.69  | 0.65  | 0.62  | 0.60  | 0.60  | 0.60  |
| Congo   | G5174     | 1              | 1.00 | 0.98 | 0.97 | 0.95 | 0.93 | 0.91 | 0.88 | 0.86 | 0.84 | 0.82  | 0.78  | 0.73  | 0.68  | 0.63  | 0.59  | 0.49  | 0.43  |
| Congo   | G5177     | 1              | 1.00 | 0.99 | 0.97 | 0.94 | 0.90 | 0.87 | 0.84 | 0.80 | 0.78 | 0.75  | 0.70  | 0.67  | 0.64  | 0.62  | 0.61  | 0.61  | 0.61  |
| Congo   | G5178     | 1              | 1.00 | 1.00 | 0.99 | 0.99 | 0.97 | 0.96 | 0.93 | 0.90 | 0.86 | 0.83  | 0.76  | 0.71  | 0.66  | 0.63  | 0.61  | 0.60  | 0.59  |
| Congo   | G5181     | 1              | 1.00 | 0.99 | 0.99 | 0.97 | 0.95 | 0.93 | 0.91 | 0.88 | 0.85 | 0.81  | 0.73  | 0.64  | 0.55  | 0.46  | 0.39  | 0.30  | 0.29  |
| Congo   | G5185     | 1              | 1.00 | 1.00 | 1.00 | 0.99 | 0.99 | 0.99 | 0.98 | 0.97 | 0.96 | 0.95  | 0.91  | 0.86  | 0.80  | 0.74  | 0.69  | 0.59  | 0.53  |
| Congo   | G5186     | 1              | 1.00 | 1.00 | 0.99 | 0.98 | 0.97 | 0.96 | 0.94 | 0.92 | 0.90 | 0.88  | 0.84  | 0.78  | 0.73  | 0.68  | 0.62  | 0.49  | 0.40  |
| Congo   | G5187     | 1              | 1.00 | 1.00 | 1.00 | 1.00 | 1.00 | 0.99 | 0.99 | 0.99 | 0.99 | 0.98  | 0.97  | 0.95  | 0.93  | 0.89  | 0.84  | 0.70  | 0.60  |
| Congo   | G5188     | 1              | 1.00 | 0.99 | 0.96 | 0.93 | 0.89 | 0.85 | 0.80 | 0.76 | 0.71 | 0.67  | 0.59  | 0.52  | 0.44  | 0.37  | 0.31  | 0.23  | 0.23  |
| Congo   | G5189     | 1              | 1.00 | 0.98 | 0.96 | 0.93 | 0.89 | 0.85 | 0.82 | 0.78 | 0.74 | 0.71  | 0.65  | 0.60  | 0.56  | 0.53  | 0.51  | 0.46  | 0.44  |
| Congo   | G5192     | 1              | 1.00 | 1.00 | 0.99 | 0.98 | 0.97 | 0.95 | 0.94 | 0.92 | 0.90 | 0.88  | 0.83  | 0.78  | 0.73  | 0.68  | 0.64  | 0.57  | 0.53  |
| Congo   | G5193     | 1              | 1.00 | 0.99 | 0.97 | 0.94 | 0.90 | 0.86 | 0.79 | 0.72 | 0.65 | 0.57  | 0.44  | 0.34  | 0.25  | 0.17  | 0.11  | -0.02 | -0.14 |
| Congo   | G5199     | 1              | 1.00 | 0.99 | 0.98 | 0.97 | 0.95 | 0.93 | 0.91 | 0.88 | 0.84 | 0.80  | 0.71  | 0.59  | 0.46  | 0.31  | 0.18  | -0.02 | -0.09 |
| Congo   | G5203     | 1              | 1.00 | 1.00 | 0.99 | 0.98 | 0.97 | 0.95 | 0.94 | 0.92 | 0.90 | 0.88  | 0.83  | 0.78  | 0.73  | 0.67  | 0.61  | 0.50  | 0.43  |
| Congo   | G5204     | 1              | 0.99 | 0.95 | 0.90 | 0.83 | 0.76 | 0.69 | 0.63 | 0.57 | 0.53 | 0.49  | 0.43  | 0.37  | 0.32  | 0.30  | 0.28  | 0.23  | 0.20  |
| Congo   | G5205     | 1              | 1.00 | 1.00 | 0.99 | 0.98 | 0.96 | 0.94 | 0.92 | 0.90 | 0.87 | 0.84  | 0.76  | 0.66  | 0.55  | 0.42  | 0.29  | 0.02  | -0.12 |
| Congo   | G5206     | 1              | 1.00 | 1.00 | 1.00 | 0.99 | 0.98 | 0.97 | 0.96 | 0.94 | 0.92 | 0.90  | 0.84  | 0.78  | 0.72  | 0.67  | 0.62  | 0.55  | 0.50  |
| Congo   | G5207     | 1              | 1.00 | 0.98 | 0.93 | 0.84 | 0.72 | 0.57 | 0.43 | 0.30 | 0.18 | 0.07  | -0.10 | -0.26 | -0.38 | -0.49 | -0.59 | -0.80 | -1.00 |
| Congo   | G5214     | 1              | 1.00 | 1.00 | 1.00 | 1.00 | 1.00 | 0.99 | 0.99 | 0.99 | 0.99 | 0.99  | 0.98  | 0.97  | 0.96  | 0.94  | 0.91  | 0.80  | 0.67  |
| Congo   | G5215     | 1              | 1.00 | 1.00 | 0.99 | 0.99 | 0.98 | 0.98 | 0.97 | 0.95 | 0.94 | 0.92  | 0.89  | 0.85  | 0.79  | 0.73  | 0.64  | 0.38  | 0.13  |
| Congo   | G5216     | 1              | 1.00 | 0.99 | 0.99 | 0.97 | 0.95 | 0.93 | 0.90 | 0.87 | 0.84 | 0.80  | 0.73  | 0.64  | 0.56  | 0.48  | 0.39  | 0.19  | 0.00  |
| Congo   | G5217     | 1              | 1.00 | 1.00 | 0.99 | 0.98 | 0.97 | 0.96 | 0.94 | 0.92 | 0.90 | 0.87  | 0.81  | 0.75  | 0.69  | 0.65  | 0.62  | 0.56  | 0.53  |
| Congo   | G5219     | 1              | 1.00 | 0.99 | 0.98 | 0.96 | 0.95 | 0.93 | 0.91 | 0.88 | 0.84 | 0.80  | 0.72  | 0.66  | 0.62  | 0.59  | 0.56  | 0.51  | 0.47  |
| Congo   | G5220     | 1              | 1.00 | 0.99 | 0.97 | 0.93 | 0.89 | 0.84 | 0.80 | 0.75 | 0.71 | 0.67  | 0.60  | 0.55  | 0.51  | 0.48  | 0.46  | 0.42  | 0.40  |
| Congo   | G5223     | 1              | 1.00 | 1.00 | 0.99 | 0.98 | 0.97 | 0.95 | 0.93 | 0.90 | 0.87 | 0.84  | 0.78  | 0.72  | 0.67  | 0.63  | 0.60  | 0.54  | 0.52  |
| Congo   | G5225     | 1              | 1.00 | 1.00 | 1.00 | 1.00 | 1.00 | 1.00 | 0.99 | 0.99 | 0.98 | 0.97  | 0.95  | 0.90  | 0.85  | 0.80  | 0.75  | 0.65  | 0.61  |
| Congo   | G5226     | 1              | 1.00 | 0.99 | 0.99 | 0.98 | 0.96 | 0.95 | 0.92 | 0.90 | 0.87 | 0.84  | 0.76  | 0.68  | 0.59  | 0.52  | 0.46  | 0.38  | 0.35  |
| Congo   | G5227     | 1              | 1.00 | 1.00 | 0.99 | 0.98 | 0.97 | 0.96 | 0.94 | 0.91 | 0.88 | 0.85  | 0.78  | 0.73  | 0.67  | 0.63  | 0.60  | 0.54  | 0.52  |
| Congo   | G5231     | 1              | 0.99 | 0.97 | 0.94 | 0.89 | 0.83 | 0.75 | 0.66 | 0.57 | 0.48 | 0.39  | 0.24  | 0.14  | 0.08  | 0.04  | 0.03  | 0.02  | 0.06  |
| Congo   | G5232     | 1              | 1.00 | 0.97 | 0.91 | 0.81 | 0.69 | 0.54 | 0.38 | 0.22 | 0.07 | -0.05 | -0.23 | -0.34 | -0.40 | -0.42 | -0.41 | -0.27 | -0.13 |



| Country | GloFAS ID | Station filter | LT1  | LT2  | LT3  | LT4  | LT5  | LT6  | LT7   | LT8   | LT9   | LT10  | LT12  | LT14  | LT16  | LT18  | LT20  | LT25  | L30   |
|---------|-----------|----------------|------|------|------|------|------|------|-------|-------|-------|-------|-------|-------|-------|-------|-------|-------|-------|
| Congo   | G5233     | 1              | 1.00 | 1.00 | 1.00 | 1.00 | 0.99 | 0.99 | 0.99  | 0.99  | 0.99  | 0.98  | 0.97  | 0.96  | 0.95  | 0.93  | 0.90  | 0.78  | 0.65  |
| Congo   | G5234     | 1              | 1.00 | 0.99 | 0.97 | 0.95 | 0.92 | 0.88 | 0.82  | 0.76  | 0.69  | 0.61  | 0.47  | 0.34  | 0.24  | 0.17  | 0.12  | 0.07  | 0.08  |
| Congo   | G5236     | 1              | 0.99 | 0.95 | 0.88 | 0.79 | 0.69 | 0.58 | 0.46  | 0.32  | 0.17  | 0.02  | -0.24 | -0.44 | -0.58 | -0.68 | -0.74 | -0.80 | -0.74 |
| Congo   | G5237     | 1              | 1.00 | 0.98 | 0.93 | 0.87 | 0.80 | 0.72 | 0.61  | 0.50  | 0.39  | 0.27  | 0.06  | -0.11 | -0.23 | -0.31 | -0.35 | -0.38 | -0.32 |
| Congo   | G5238     | 1              | 1.00 | 1.00 | 0.99 | 0.98 | 0.97 | 0.96 | 0.94  | 0.93  | 0.90  | 0.88  | 0.80  | 0.71  | 0.59  | 0.45  | 0.30  | -0.06 | -0.28 |
| Congo   | G5242     | 1              | 1.00 | 1.00 | 0.99 | 0.99 | 0.97 | 0.96 | 0.93  | 0.90  | 0.87  | 0.84  | 0.77  | 0.71  | 0.66  | 0.62  | 0.59  | 0.54  | 0.51  |
| Congo   | G5243     | 1              | 0.99 | 0.97 | 0.93 | 0.88 | 0.82 | 0.77 | 0.71  | 0.66  | 0.62  | 0.58  | 0.51  | 0.46  | 0.42  | 0.39  | 0.36  | 0.30  | 0.26  |
| Congo   | G5252     | 1              | 1.00 | 1.00 | 0.99 | 0.99 | 0.97 | 0.96 | 0.94  | 0.92  | 0.90  | 0.87  | 0.80  | 0.71  | 0.59  | 0.44  | 0.27  | -0.12 | -0.33 |
| Congo   | G5253     | 1              | 1.00 | 1.00 | 0.99 | 0.99 | 0.98 | 0.96 | 0.95  | 0.92  | 0.90  | 0.87  | 0.80  | 0.70  | 0.56  | 0.38  | 0.19  | -0.20 | -0.37 |
| Congo   | G5254     | 1              | 1.00 | 0.99 | 0.98 | 0.96 | 0.94 | 0.91 | 0.88  | 0.84  | 0.80  | 0.75  | 0.64  | 0.49  | 0.33  | 0.16  | 0.02  | -0.21 | -0.28 |
| Congo   | G5260     | 1              | 1.00 | 0.99 | 0.97 | 0.95 | 0.91 | 0.88 | 0.84  | 0.78  | 0.72  | 0.64  | 0.44  | 0.21  | -0.01 | -0.19 | -0.31 | -0.43 | -0.41 |
| Congo   | G5261     | 1              | 1.00 | 0.99 | 0.97 | 0.95 | 0.93 | 0.89 | 0.86  | 0.81  | 0.76  | 0.70  | 0.53  | 0.30  | 0.05  | -0.18 | -0.36 | -0.58 | -0.62 |
| Congo   | G5264     | 1              | 1.00 | 0.99 | 0.98 | 0.96 | 0.93 | 0.90 | 0.86  | 0.81  | 0.75  | 0.68  | 0.50  | 0.30  | 0.10  | -0.07 | -0.20 | -0.34 | -0.34 |
| Congo   | G5268     | 1              | 1.00 | 1.00 | 1.00 | 1.00 | 1.00 | 0.99 | 0.99  | 0.99  | 0.99  | 0.98  | 0.97  | 0.95  | 0.91  | 0.87  | 0.82  | 0.70  | 0.63  |
| Congo   | G5269     | 1              | 1.00 | 1.00 | 1.00 | 0.99 | 0.99 | 0.99 | 0.98  | 0.98  | 0.97  | 0.96  | 0.94  | 0.92  | 0.89  | 0.85  | 0.80  | 0.65  | 0.50  |
| Congo   | G5273     | 1              | 1.00 | 0.99 | 0.96 | 0.93 | 0.88 | 0.81 | 0.72  | 0.63  | 0.52  | 0.40  | 0.16  | -0.06 | -0.23 | -0.34 | -0.41 | -0.43 | -0.36 |
| Congo   | G5276     | 1              | 1.00 | 0.98 | 0.94 | 0.88 | 0.80 | 0.70 | 0.59  | 0.47  | 0.35  | 0.22  | -0.02 | -0.25 | -0.43 | -0.57 | -0.69 | -0.86 | -0.88 |
| Congo   | G5277     | 1              | 1.00 | 1.00 | 0.99 | 0.99 | 0.98 | 0.97 | 0.96  | 0.96  | 0.95  | 0.94  | 0.91  | 0.87  | 0.83  | 0.78  | 0.72  | 0.57  | 0.46  |
| Congo   | G5278     | 1              | 1.00 | 1.00 | 0.99 | 0.98 | 0.97 | 0.96 | 0.95  | 0.93  | 0.91  | 0.88  | 0.82  | 0.73  | 0.64  | 0.54  | 0.46  | 0.32  | 0.26  |
| Congo   | G5281     | 1              | 0.99 | 0.93 | 0.81 | 0.70 | 0.62 | 0.55 | 0.51  | 0.48  | 0.45  | 0.42  | 0.38  | 0.34  | 0.31  | 0.28  | 0.27  | 0.21  | 0.17  |
| Congo   | G5283     | 1              | 1.00 | 0.99 | 0.98 | 0.96 | 0.93 | 0.88 | 0.82  | 0.73  | 0.64  | 0.53  | 0.29  | 0.04  | -0.18 | -0.34 | -0.46 | -0.58 | -0.55 |
| Congo   | G5284     | 1              | 1.00 | 1.00 | 1.00 | 0.99 | 0.99 | 0.98 | 0.97  | 0.96  | 0.96  | 0.94  | 0.92  | 0.88  | 0.84  | 0.78  | 0.72  | 0.57  | 0.45  |
| Congo   | G5285     | 1              | 1.00 | 1.00 | 0.99 | 0.99 | 0.98 | 0.96 | 0.94  | 0.92  | 0.89  | 0.86  | 0.78  | 0.70  | 0.61  | 0.53  | 0.46  | 0.31  | 0.21  |
| Congo   | G5286     | 1              | 1.00 | 1.00 | 1.00 | 0.99 | 0.99 | 0.99 | 0.99  | 0.98  | 0.98  | 0.97  | 0.96  | 0.94  | 0.91  | 0.87  | 0.83  | 0.69  | 0.55  |
| Congo   | G5287     | 1              | 0.98 | 0.83 | 0.61 | 0.46 | 0.37 | 0.30 | 0.26  | 0.25  | 0.24  | 0.20  | 0.19  | 0.16  | 0.16  | 0.12  | 0.11  | 0.05  | 0.04  |
| Congo   | G5297     | 1              | 1.00 | 0.99 | 0.98 | 0.97 | 0.95 | 0.92 | 0.89  | 0.86  | 0.82  | 0.79  | 0.73  | 0.68  | 0.64  | 0.61  | 0.58  | 0.53  | 0.52  |
| Congo   | G5298     | 1              | 1.00 | 0.99 | 0.98 | 0.95 | 0.89 | 0.81 | 0.74  | 0.67  | 0.62  | 0.58  | 0.53  | 0.49  | 0.46  | 0.44  | 0.41  | 0.36  | 0.33  |
| Congo   | G5303     | 1              | 1.00 | 0.98 | 0.96 | 0.92 | 0.87 | 0.82 | 0.75  | 0.67  | 0.57  | 0.44  | 0.09  | -0.32 | -0.68 | -0.96 | -1.18 | -1.47 | -1.55 |
| Congo   | G5304     | 1              | 1.00 | 1.00 | 1.00 | 0.99 | 0.99 | 0.99 | 0.98  | 0.98  | 0.97  | 0.96  | 0.94  | 0.92  | 0.88  | 0.84  | 0.80  | 0.66  | 0.52  |
| Congo   | G5315     | 1              | 1.00 | 0.98 | 0.95 | 0.92 | 0.87 | 0.81 | 0.74  | 0.64  | 0.52  | 0.39  | 0.15  | -0.05 | -0.18 | -0.26 | -0.31 | -0.31 | -0.24 |
| Congo   | G5316     | 1              | 1.00 | 0.99 | 0.98 | 0.97 | 0.95 | 0.93 | 0.90  | 0.87  | 0.84  | 0.81  | 0.75  | 0.71  | 0.68  | 0.64  | 0.62  | 0.58  | 0.57  |
| Congo   | G5317     | 1              | 0.99 | 0.98 | 0.96 | 0.93 | 0.88 | 0.81 | 0.72  | 0.63  | 0.55  | 0.48  | 0.40  | 0.35  | 0.30  | 0.26  | 0.22  | 0.16  | 0.13  |
| Congo   | G5331     | 1              | 1.00 | 1.00 | 1.00 | 1.00 | 0.99 | 0.99 | 0.98  | 0.98  | 0.97  | 0.97  | 0.95  | 0.92  | 0.89  | 0.85  | 0.81  | 0.68  | 0.53  |
| Congo   | G5359     | 1              | 1.00 | 0.99 | 0.97 | 0.96 | 0.94 | 0.91 | 0.89  | 0.85  | 0.82  | 0.77  | 0.68  | 0.58  | 0.47  | 0.35  | 0.22  | -0.03 | -0.15 |
| Congo   | G5360     | 1              | 0.99 | 0.98 | 0.95 | 0.91 | 0.85 | 0.78 | 0.71  | 0.64  | 0.57  | 0.52  | 0.45  | 0.40  | 0.35  | 0.32  | 0.28  | 0.22  | 0.18  |
| Congo   | G5362     | 1              | 1.00 | 1.00 | 1.00 | 1.00 | 0.99 | 0.99 | 0.99  | 0.98  | 0.97  | 0.97  | 0.95  | 0.93  | 0.90  | 0.87  | 0.83  | 0.70  | 0.56  |
| Congo   | G5363     | 1              | 1.00 | 1.00 | 0.99 | 0.98 | 0.96 | 0.94 | 0.91  | 0.88  | 0.85  | 0.82  | 0.78  | 0.74  | 0.70  | 0.67  | 0.65  | 0.62  | 0.60  |
| Congo   | G5364     | 1              | 0.99 | 0.97 | 0.92 | 0.82 | 0.66 | 0.39 | -0.01 | -0.48 | -0.96 | -1.41 | -2.13 | -2.67 | -3.06 | -3.34 | -3.51 | -3.67 | -3.54 |
| Congo   | G5370     | 1              | 1.00 | 1.00 | 1.00 | 1.00 | 0.99 | 0.99 | 0.98  | 0.98  | 0.97  | 0.96  | 0.94  | 0.92  | 0.89  | 0.85  | 0.81  | 0.69  | 0.55  |

| Country | GloFAS ID | Station filter | LT1  | LT2  | LT3  | LT4   | LT5   | LT6   | LT7   | LT8   | LT9   | LT10  | LT12  | LT14  | LT16  | LT18  | LT20  | LT25  | L30   |
|---------|-----------|----------------|------|------|------|-------|-------|-------|-------|-------|-------|-------|-------|-------|-------|-------|-------|-------|-------|
| Congo   | G5371     | 1              | 1.00 | 0.99 | 0.98 | 0.97  | 0.95  | 0.92  | 0.90  | 0.87  | 0.83  | 0.80  | 0.72  | 0.64  | 0.55  | 0.44  | 0.34  | 0.06  | -0.13 |
| Congo   | G5373     | 1              | 1.00 | 1.00 | 1.00 | 0.99  | 0.98  | 0.97  | 0.95  | 0.93  | 0.91  | 0.87  | 0.78  | 0.66  | 0.52  | 0.36  | 0.19  | -0.18 | -0.38 |
| Congo   | G5374     | 1              | 1.00 | 1.00 | 0.99 | 0.99  | 0.97  | 0.96  | 0.93  | 0.90  | 0.86  | 0.82  | 0.70  | 0.55  | 0.39  | 0.21  | 0.04  | -0.30 | -0.42 |
| Congo   | G5377     | 1              | 1.00 | 1.00 | 0.99 | 0.99  | 0.98  | 0.97  | 0.96  | 0.94  | 0.92  | 0.90  | 0.83  | 0.73  | 0.61  | 0.47  | 0.31  | -0.03 | -0.18 |
| Congo   | G5381     | 1              | 0.87 | 0.67 | 0.48 | 0.28  | 0.11  | -0.03 | -0.14 | -0.24 | -0.30 | -0.36 | -0.44 | -0.48 | -0.50 | -0.51 | -0.51 | -0.46 | -0.39 |
| Congo   | G5382     | 1              | 1.00 | 1.00 | 0.99 | 0.98  | 0.95  | 0.91  | 0.86  | 0.79  | 0.71  | 0.63  | 0.43  | 0.21  | -0.02 | -0.22 | -0.39 | -0.62 | -0.67 |
| Congo   | G5386     | 1              | 1.00 | 1.00 | 0.99 | 0.97  | 0.94  | 0.90  | 0.84  | 0.77  | 0.70  | 0.61  | 0.41  | 0.18  | -0.08 | -0.34 | -0.55 | -0.86 | -0.92 |
| Congo   | G5387     | 1              | 1.00 | 1.00 | 0.99 | 0.97  | 0.95  | 0.91  | 0.86  | 0.80  | 0.72  | 0.63  | 0.44  | 0.25  | 0.09  | -0.04 | -0.14 | -0.27 | -0.28 |
| Congo   | G5388     | 1              | 0.97 | 0.88 | 0.71 | 0.44  | 0.09  | -0.31 | -0.73 | -1.14 | -1.47 | -1.73 | -2.09 | -2.26 | -2.33 | -2.32 | -2.27 | -2.00 | -1.65 |
| Congo   | G5403     | 1              | 1.00 | 0.99 | 0.98 | 0.95  | 0.91  | 0.85  | 0.79  | 0.72  | 0.64  | 0.56  | 0.40  | 0.25  | 0.12  | 0.02  | -0.06 | -0.16 | -0.17 |
| Congo   | G5407     | 1              | 1.00 | 0.99 | 0.97 | 0.92  | 0.85  | 0.76  | 0.66  | 0.55  | 0.44  | 0.33  | 0.12  | -0.04 | -0.16 | -0.24 | -0.29 | -0.32 | -0.30 |
| Congo   | G5408     | 1              | 1.00 | 0.99 | 0.97 | 0.95  | 0.92  | 0.88  | 0.83  | 0.77  | 0.70  | 0.61  | 0.38  | 0.10  | -0.20 | -0.46 | -0.66 | -0.91 | -0.93 |
| Congo   | G5409     | 1              | 1.00 | 0.98 | 0.93 | 0.84  | 0.74  | 0.62  | 0.51  | 0.39  | 0.28  | 0.18  | -0.01 | -0.17 | -0.29 | -0.36 | -0.42 | -0.46 | -0.42 |
| Congo   | G5410     | 1              | 1.00 | 1.00 | 0.99 | 0.98  | 0.97  | 0.95  | 0.92  | 0.89  | 0.85  | 0.79  | 0.64  | 0.43  | 0.19  | -0.03 | -0.19 | -0.39 | -0.37 |
| Congo   | G5411     | 1              | 1.00 | 0.99 | 0.97 | 0.93  | 0.87  | 0.77  | 0.65  | 0.50  | 0.35  | 0.20  | -0.05 | -0.22 | -0.33 | -0.39 | -0.42 | -0.39 | -0.30 |
| Congo   | G5412     | 1              | 0.99 | 0.97 | 0.91 | 0.82  | 0.71  | 0.59  | 0.45  | 0.30  | 0.15  | 0.02  | -0.20 | -0.35 | -0.44 | -0.50 | -0.52 | -0.47 | -0.37 |
| Congo   | G5414     | 1              | 1.00 | 0.99 | 0.99 | 0.98  | 0.96  | 0.95  | 0.93  | 0.91  | 0.88  | 0.84  | 0.73  | 0.58  | 0.39  | 0.17  | -0.04 | -0.36 | -0.42 |
| Congo   | G5415     | 1              | 1.00 | 0.99 | 0.98 | 0.96  | 0.92  | 0.88  | 0.82  | 0.74  | 0.65  | 0.55  | 0.31  | 0.09  | -0.07 | -0.19 | -0.25 | -0.27 | -0.18 |
| Congo   | G5420     | 1              | 1.00 | 0.98 | 0.96 | 0.94  | 0.91  | 0.88  | 0.84  | 0.79  | 0.74  | 0.68  | 0.55  | 0.41  | 0.27  | 0.14  | 0.03  | -0.12 | -0.16 |
| Congo   | G5421     | 1              | 1.00 | 1.00 | 0.99 | 0.98  | 0.96  | 0.94  | 0.91  | 0.87  | 0.83  | 0.78  | 0.65  | 0.50  | 0.35  | 0.20  | 0.07  | -0.10 | -0.12 |
| Congo   | G5422     | 1              | 1.00 | 0.99 | 0.99 | 0.97  | 0.95  | 0.92  | 0.88  | 0.83  | 0.78  | 0.72  | 0.58  | 0.44  | 0.32  | 0.22  | 0.15  | 0.07  | 0.08  |
| Congo   | G5431     | 1              | 1.00 | 1.00 | 0.99 | 0.99  | 0.98  | 0.98  | 0.97  | 0.96  | 0.95  | 0.94  | 0.91  | 0.87  | 0.82  | 0.77  | 0.70  | 0.52  | 0.34  |
| Congo   | G5436     | 1              | 1.00 | 0.99 | 0.97 | 0.94  | 0.89  | 0.81  | 0.72  | 0.62  | 0.52  | 0.44  | 0.31  | 0.21  | 0.14  | 0.08  | 0.04  | -0.03 | -0.08 |
| Congo   | G5440     | 1              | 0.98 | 0.83 | 0.45 | -0.01 | -0.51 | -1.03 | -1.51 | -1.90 | -2.21 | -2.44 | -2.76 | -2.93 | -2.99 | -2.96 | -2.92 | -2.70 | -2.36 |
| Congo   | G5441     | 1              | 0.99 | 0.96 | 0.92 | 0.87  | 0.80  | 0.74  | 0.66  | 0.59  | 0.52  | 0.45  | 0.33  | 0.22  | 0.14  | 0.08  | 0.03  | -0.02 | -0.01 |
| Congo   | G5442     | 1              | 1.00 | 0.99 | 0.98 | 0.96  | 0.93  | 0.91  | 0.89  | 0.87  | 0.85  | 0.83  | 0.79  | 0.75  | 0.72  | 0.70  | 0.68  | 0.66  | 0.63  |
| Congo   | G5443     | 1              | 1.00 | 0.98 | 0.95 | 0.92  | 0.87  | 0.81  | 0.75  | 0.68  | 0.60  | 0.53  | 0.39  | 0.26  | 0.15  | 0.07  | 0.01  | -0.07 | -0.07 |
| Congo   | G5444     | 1              | 1.00 | 0.99 | 0.97 | 0.94  | 0.90  | 0.83  | 0.75  | 0.65  | 0.53  | 0.41  | 0.19  | 0.03  | -0.09 | -0.16 | -0.19 | -0.15 | -0.05 |
| Congo   | G5448     | 1              | 1.00 | 0.98 | 0.96 | 0.91  | 0.85  | 0.77  | 0.70  | 0.62  | 0.55  | 0.49  | 0.37  | 0.26  | 0.17  | 0.09  | 0.05  | 0.01  | 0.05  |
| Congo   | G5449     | 1              | 0.98 | 0.93 | 0.84 | 0.71  | 0.56  | 0.41  | 0.28  | 0.18  | 0.09  | 0.02  | -0.08 | -0.16 | -0.21 | -0.21 | -0.18 | -0.09 | -0.01 |
| Congo   | G5455     | 1              | 1.00 | 0.99 | 0.98 | 0.96  | 0.94  | 0.90  | 0.86  | 0.80  | 0.74  | 0.68  | 0.54  | 0.42  | 0.32  | 0.25  | 0.20  | 0.16  | 0.18  |
| Congo   | G5465     | 1              | 0.99 | 0.98 | 0.96 | 0.94  | 0.90  | 0.86  | 0.81  | 0.76  | 0.69  | 0.62  | 0.47  | 0.35  | 0.24  | 0.16  | 0.11  | 0.04  | 0.04  |
| Congo   | G5473     | 1              | 1.00 | 0.99 | 0.98 | 0.95  | 0.93  | 0.90  | 0.87  | 0.85  | 0.82  | 0.79  | 0.73  | 0.68  | 0.63  | 0.60  | 0.58  | 0.54  | 0.52  |
| Congo   | G5476     | 1              | 1.00 | 0.96 | 0.83 | 0.60  | 0.25  | -0.16 | -0.62 | -1.07 | -1.50 | -1.88 | -2.50 | -2.97 | -3.31 | -3.53 | -3.67 | -3.72 | -3.52 |
| Congo   | G5477     | 1              | 1.00 | 0.99 | 0.97 | 0.95  | 0.93  | 0.92  | 0.91  | 0.90  | 0.89  | 0.89  | 0.88  | 0.87  | 0.86  | 0.85  | 0.84  | 0.80  | 0.76  |
| Congo   | G5481     | 1              | 0.99 | 0.94 | 0.88 | 0.80  | 0.72  | 0.63  | 0.53  | 0.43  | 0.33  | 0.24  | 0.10  | 0.00  | -0.06 | -0.07 | -0.06 | -0.02 | 0.03  |
| Congo   | G5484     | 1              | 0.99 | 0.97 | 0.93 | 0.86  | 0.75  | 0.63  | 0.51  | 0.40  | 0.30  | 0.20  | 0.06  | -0.04 | -0.10 | -0.12 | -0.11 | -0.03 | 0.06  |
| Congo   | G5485     | 1              | 1.00 | 0.99 | 0.98 | 0.95  | 0.92  | 0.88  | 0.84  | 0.79  | 0.73  | 0.66  | 0.52  | 0.37  | 0.25  | 0.16  | 0.09  | 0.01  | 0.00  |
| Congo   | G5489     | 1              | 1.00 | 0.98 | 0.95 | 0.90  | 0.84  | 0.78  | 0.71  | 0.64  | 0.56  | 0.48  | 0.33  | 0.19  | 0.09  | 0.02  | -0.03 | -0.11 | -0.12 |

| Country       | GloFAS ID | Station filter | LT1  | LT2  | LT3  | LT4  | LT5  | LT6  | LT7  | LT8  | LT9  | LT10  | LT12 | LT14  | LT16  | LT18  | LT20  | LT25  | L30   |
|---------------|-----------|----------------|------|------|------|------|------|------|------|------|------|-------|------|-------|-------|-------|-------|-------|-------|
| Congo         | G5491     | 1              | 1.00 | 0.99 | 0.97 | 0.93 | 0.89 | 0.84 | 0.78 | 0.72 | 0.65 | 0.58  | 0.45 | 0.34  | 0.25  | 0.20  | 0.17  | 0.14  | 0.15  |
| Congo         | G5492     | 1              | 1.00 | 0.99 | 0.97 | 0.93 | 0.89 | 0.83 | 0.77 | 0.70 | 0.64 | 0.58  | 0.47 | 0.38  | 0.32  | 0.28  | 0.26  | 0.25  | 0.28  |
| Congo         | G5493     | 1              | 0.99 | 0.95 | 0.88 | 0.79 | 0.67 | 0.54 | 0.42 | 0.31 | 0.22 | 0.14  | 0.02 | -0.06 | -0.11 | -0.12 | -0.09 | -0.01 | 0.06  |
| Congo         | G5494     | 1              | 0.99 | 0.96 | 0.89 | 0.79 | 0.68 | 0.57 | 0.45 | 0.35 | 0.25 | 0.17  | 0.04 | -0.05 | -0.10 | -0.11 | -0.10 | -0.02 | 0.07  |
| Congo         | G5495     | 1              | 1.00 | 0.98 | 0.96 | 0.92 | 0.86 | 0.80 | 0.74 | 0.67 | 0.61 | 0.55  | 0.45 | 0.36  | 0.31  | 0.27  | 0.25  | 0.24  | 0.27  |
| Congo         | G5496     | 1              | 1.00 | 0.99 | 0.99 | 0.97 | 0.96 | 0.93 | 0.91 | 0.88 | 0.86 | 0.83  | 0.77 | 0.71  | 0.67  | 0.64  | 0.62  | 0.57  | 0.53  |
| Congo         | G5499     | 1              | 1.00 | 0.99 | 0.97 | 0.94 | 0.90 | 0.85 | 0.80 | 0.75 | 0.69 | 0.63  | 0.54 | 0.46  | 0.41  | 0.37  | 0.35  | 0.35  | 0.36  |
| Congo         | G5500     | 1              | 1.00 | 0.98 | 0.95 | 0.90 | 0.85 | 0.79 | 0.73 | 0.67 | 0.61 | 0.55  | 0.46 | 0.38  | 0.33  | 0.29  | 0.26  | 0.25  | 0.28  |
| Congo         | G5502     | 1              | 1.00 | 0.99 | 0.98 | 0.94 | 0.89 | 0.83 | 0.77 | 0.70 | 0.64 | 0.58  | 0.48 | 0.39  | 0.33  | 0.30  | 0.28  | 0.27  | 0.29  |
| Congo         | G5504     | 1              | 1.00 | 0.99 | 0.98 | 0.97 | 0.95 | 0.93 | 0.90 | 0.86 | 0.82 | 0.77  | 0.69 | 0.62  | 0.56  | 0.51  | 0.48  | 0.43  | 0.40  |
| Congo         | G5505     | 1              | 1.00 | 0.99 | 0.98 | 0.96 | 0.93 | 0.91 | 0.88 | 0.87 | 0.85 | 0.83  | 0.81 | 0.79  | 0.77  | 0.75  | 0.74  | 0.69  | 0.64  |
| Congo         | G5507     | 1              | 1.00 | 0.99 | 0.97 | 0.92 | 0.85 | 0.79 | 0.72 | 0.66 | 0.60 | 0.54  | 0.45 | 0.37  | 0.32  | 0.30  | 0.28  | 0.29  | 0.32  |
| Congo         | G5508     | 1              | 1.00 | 0.99 | 0.97 | 0.94 | 0.89 | 0.83 | 0.77 | 0.71 | 0.66 | 0.60  | 0.50 | 0.41  | 0.35  | 0.32  | 0.29  | 0.27  | 0.27  |
| Congo         | G5509     | 1              | 0.99 | 0.94 | 0.86 | 0.78 | 0.70 | 0.63 | 0.55 | 0.49 | 0.43 | 0.37  | 0.29 | 0.24  | 0.20  | 0.19  | 0.20  | 0.22  | 0.25  |
| Congo         | G5511     | 1              | 1.00 | 0.99 | 0.97 | 0.94 | 0.89 | 0.85 | 0.79 | 0.74 | 0.69 | 0.64  | 0.56 | 0.49  | 0.43  | 0.38  | 0.34  | 0.31  | 0.32  |
| Congo         | G5531     | 1              | 1.00 | 0.99 | 0.96 | 0.92 | 0.85 | 0.77 | 0.68 | 0.60 | 0.52 | 0.45  | 0.34 | 0.25  | 0.20  | 0.15  | 0.13  | 0.12  | 0.15  |
| Congo         | G5536     | 1              | 0.98 | 0.93 | 0.85 | 0.74 | 0.63 | 0.55 | 0.48 | 0.42 | 0.37 | 0.33  | 0.26 | 0.22  | 0.19  | 0.18  | 0.19  | 0.20  | 0.18  |
| Congo         | G5537     | 1              | 0.99 | 0.98 | 0.95 | 0.91 | 0.86 | 0.80 | 0.74 | 0.69 | 0.64 | 0.59  | 0.51 | 0.45  | 0.40  | 0.37  | 0.37  | 0.35  | 0.32  |
| Congo         | G5538     | 1              | 1.00 | 0.98 | 0.94 | 0.90 | 0.86 | 0.82 | 0.77 | 0.73 | 0.69 | 0.66  | 0.60 | 0.55  | 0.52  | 0.48  | 0.46  | 0.42  | 0.38  |
| Congo         | G5539     | 1              | 0.95 | 0.81 | 0.72 | 0.64 | 0.58 | 0.54 | 0.51 | 0.48 | 0.44 | 0.43  | 0.37 | 0.33  | 0.29  | 0.27  | 0.24  | 0.21  | 0.17  |
| Congo         | G5554     | 1              | 0.99 | 0.95 | 0.90 | 0.82 | 0.74 | 0.66 | 0.59 | 0.53 | 0.48 | 0.43  | 0.35 | 0.29  | 0.24  | 0.23  | 0.23  | 0.20  | 0.17  |
| Congo         | G5558     | 1              | 0.99 | 0.95 | 0.88 | 0.83 | 0.78 | 0.74 | 0.70 | 0.67 | 0.64 | 0.61  | 0.56 | 0.51  | 0.47  | 0.45  | 0.43  | 0.37  | 0.32  |
| Congo         | G5564     | 1              | 0.99 | 0.97 | 0.94 | 0.90 | 0.86 | 0.83 | 0.79 | 0.76 | 0.73 | 0.70  | 0.63 | 0.56  | 0.51  | 0.45  | 0.41  | 0.30  | 0.21  |
| Cote d'Ivoire | G1063     | 1              | 0.93 | 0.82 | 0.73 | 0.64 | 0.53 | 0.47 | 0.42 | 0.35 | 0.30 | 0.27  | 0.19 | 0.16  | 0.12  | 0.07  | 0.02  | -0.03 | -0.08 |
| Cote d'Ivoire | G1065     | 1              | 0.99 | 0.96 | 0.89 | 0.83 | 0.75 | 0.65 | 0.55 | 0.49 | 0.43 | 0.35  | 0.27 | 0.18  | 0.13  | 0.10  | 0.09  | 0.08  | 0.06  |
| Cote d'Ivoire | G1071     | 1              | 0.94 | 0.80 | 0.71 | 0.63 | 0.57 | 0.51 | 0.43 | 0.35 | 0.30 | 0.24  | 0.13 | 0.03  | -0.04 | -0.10 | -0.15 | -0.28 | -0.41 |
| Cote d'Ivoire | G1076     | 1              | 0.98 | 0.92 | 0.83 | 0.75 | 0.68 | 0.62 | 0.58 | 0.54 | 0.50 | 0.46  | 0.39 | 0.35  | 0.31  | 0.27  | 0.22  | 0.13  | 0.07  |
| Cote d'Ivoire | G1082     | 1              | 0.99 | 0.97 | 0.91 | 0.84 | 0.77 | 0.70 | 0.62 | 0.55 | 0.50 | 0.44  | 0.33 | 0.27  | 0.21  | 0.17  | 0.16  | 0.12  | 0.09  |
| Cote d'Ivoire | G1084     | 1              | 0.99 | 0.94 | 0.87 | 0.81 | 0.74 | 0.67 | 0.64 | 0.62 | 0.57 | 0.53  | 0.48 | 0.44  | 0.42  | 0.40  | 0.37  | 0.33  | 0.29  |
| Cote d'Ivoire | G1085     | 1              | 0.99 | 0.94 | 0.84 | 0.76 | 0.69 | 0.63 | 0.58 | 0.55 | 0.52 | 0.48  | 0.42 | 0.38  | 0.34  | 0.30  | 0.26  | 0.18  | 0.12  |
| Cote d'Ivoire | G1088     | 1              | 0.99 | 0.94 | 0.85 | 0.75 | 0.66 | 0.57 | 0.50 | 0.45 | 0.40 | 0.35  | 0.28 | 0.23  | 0.20  | 0.17  | 0.14  | 0.05  | 0.01  |
| Cote d'Ivoire | G1091     | 1              | 0.99 | 0.98 | 0.96 | 0.92 | 0.88 | 0.83 | 0.76 | 0.70 | 0.64 | 0.57  | 0.46 | 0.38  | 0.31  | 0.26  | 0.23  | 0.17  | 0.12  |
| Cote d'Ivoire | G1097     | 1              | 0.99 | 0.98 | 0.96 | 0.93 | 0.90 | 0.86 | 0.81 | 0.75 | 0.69 | 0.63  | 0.50 | 0.42  | 0.34  | 0.28  | 0.24  | 0.18  | 0.13  |
| Cote d'Ivoire | G1098     | 1              | 0.99 | 0.98 | 0.95 | 0.90 | 0.84 | 0.79 | 0.73 | 0.68 | 0.64 | 0.60  | 0.53 | 0.49  | 0.45  | 0.43  | 0.41  | 0.35  | 0.31  |
| Cote d'Ivoire | G1099     | 1              | 0.99 | 0.97 | 0.94 | 0.89 | 0.83 | 0.77 | 0.71 | 0.65 | 0.60 | 0.55  | 0.47 | 0.41  | 0.37  | 0.35  | 0.33  | 0.30  | 0.27  |
| Cote d'Ivoire | G1103     | 1              | 0.99 | 0.98 | 0.96 | 0.93 | 0.90 | 0.86 | 0.82 | 0.79 | 0.75 | 0.71  | 0.64 | 0.59  | 0.54  | 0.51  | 0.48  | 0.42  | 0.36  |
| Cote d'Ivoire | G1106     | 1              | 0.99 | 0.97 | 0.93 | 0.90 | 0.86 | 0.83 | 0.81 | 0.79 | 0.76 | 0.74  | 0.70 | 0.67  | 0.63  | 0.61  | 0.57  | 0.49  | 0.40  |
| Cote d'Ivoire | G1114     | 1              | 0.98 | 0.92 | 0.85 | 0.78 | 0.71 | 0.63 | 0.56 | 0.51 | 0.46 | 0.41  | 0.31 | 0.23  | 0.18  | 0.15  | 0.12  | 0.03  | -0.07 |
| Egypt         | G4433     | 0              | 1.00 | 1.00 | 1.00 | 1.00 | 1.00 | 1.00 | 0.95 | 0.60 | 0.15 | -0.01 | 0.11 | -3.36 | -3.00 | -1.84 | -1.04 | -0.21 | 0.16  |

| Country  | GloFAS ID | Station filter | LT1  | LT2   | LT3   | LT4   | LT5   | LT6   | LT7   | LT8   | LT9   | LT10  | LT12  | LT14  | LT16  | LT18  | LT20  | LT25  | L30   |
|----------|-----------|----------------|------|-------|-------|-------|-------|-------|-------|-------|-------|-------|-------|-------|-------|-------|-------|-------|-------|
| Egypt    | G4436     | 1              | 1.00 | 1.00  | 1.00  | 1.00  | 1.00  | 1.00  | 1.00  | 1.00  | 1.00  | 1.00  | 1.00  | 0.99  | 0.99  | 0.99  | 0.99  | 0.98  | 0.90  |
| Egypt    | G4512     | 1              | 1.00 | 1.00  | 1.00  | 0.98  | 0.96  | 0.96  | 0.96  | 0.96  | 0.97  | 0.97  | 0.97  | 0.96  | 0.93  | 0.90  | 0.90  | 0.89  | 0.84  |
| Egypt    | G4519     | 1              | 1.00 | 1.00  | 1.00  | 1.00  | 1.00  | 1.00  | 1.00  | 1.00  | 1.00  | 1.00  | 0.99  | 0.99  | 0.99  | 0.99  | 0.99  | 0.96  | 0.83  |
| Egypt    | G4580     | 0              | -    | -     | -     | -     | -     | -     | -     | -     | -     | -     | -     | -     | -     | -     | -     | -     | -     |
| Egypt    | G4584     | 1              | 1.00 | 1.00  | 1.00  | 1.00  | 1.00  | 1.00  | 1.00  | 1.00  | 1.00  | 0.99  | 0.99  | 0.99  | 0.99  | 0.99  | 0.99  | 0.93  | 0.78  |
| Egypt    | G4614     | 0              | -    | -     | -     | -     | -     | -     | -     | -     | -     | -     | -     | -     | -     | -     | -     | -     | -     |
| Egypt    | G4617     | 0              | -    | -     | -     | -     | -     | -     | -     | -     | -     | -     | -     | -     | -     | -     | -     | -     | -     |
| Egypt    | G4633     | 0              | -    | -     | -     | -     | -     | -     | -     | -     | -     | -     | -     | -     | -     | -     | -     | -     | -     |
| Egypt    | G4634     | 0              | -    | -     | -     | -     | -     | -     | -     | -     | -     | -     | -     | -     | -     | -     | -     | -     | -     |
| Eritrea  | G4837     | 1              | 1.00 | 0.99  | 0.97  | 0.91  | 0.83  | 0.73  | 0.61  | 0.50  | 0.41  | 0.32  | 0.19  | 0.10  | 0.03  | -0.06 | -0.11 | -0.20 | -0.22 |
| Eritrea  | G4838     | 1              | 0.99 | 0.94  | 0.80  | 0.59  | 0.37  | 0.18  | 0.01  | -0.12 | -0.22 | -0.30 | -0.40 | -0.45 | -0.47 | -0.50 | -0.47 | -0.34 | -0.29 |
| Ethiopia | G1045     | 1              | 1.00 | 0.99  | 0.94  | 0.86  | 0.77  | 0.70  | 0.64  | 0.58  | 0.51  | 0.44  | 0.32  | 0.20  | 0.08  | -0.01 | -0.06 | -0.15 | -0.22 |
| Ethiopia | G1053     | 1              | 0.99 | 0.94  | 0.84  | 0.74  | 0.67  | 0.61  | 0.54  | 0.46  | 0.39  | 0.32  | 0.17  | 0.04  | -0.08 | -0.13 | -0.20 | -0.29 | -0.36 |
| Ethiopia | G1067     | 1              | 0.77 | 0.25  | -0.03 | -0.18 | -0.27 | -0.35 | -0.39 | -0.42 | -0.46 | -0.48 | -0.53 | -0.60 | -0.62 | -0.48 | -0.44 | -0.47 | -0.54 |
| Ethiopia | G1074     | 1              | 0.76 | 0.39  | 0.20  | 0.07  | -0.03 | -0.10 | -0.15 | -0.19 | -0.23 | -0.27 | -0.35 | -0.43 | -0.45 | -0.35 | -0.36 | -0.43 | -0.53 |
| Ethiopia | G1603     | 1              | 0.86 | 0.61  | 0.45  | 0.36  | 0.30  | 0.24  | 0.19  | 0.16  | 0.13  | 0.08  | 0.03  | -0.03 | -0.05 | -0.02 | -0.01 | -0.09 | -0.16 |
| Ethiopia | G1901     | 1              | 0.99 | 0.90  | 0.77  | 0.61  | 0.39  | 0.14  | -0.11 | -0.34 | -0.53 | -0.70 | -0.94 | -1.11 | -1.23 | -1.32 | -1.35 | -1.29 | -1.37 |
| Ethiopia | G1902     | 1              | 0.99 | 0.94  | 0.78  | 0.51  | 0.26  | 0.04  | -0.14 | -0.27 | -0.37 | -0.44 | -0.53 | -0.60 | -0.65 | -0.66 | -0.58 | -0.37 | -0.35 |
| Ethiopia | G1904     | 1              | 0.66 | 0.09  | -0.15 | -0.26 | -0.34 | -0.39 | -0.40 | -0.40 | -0.44 | -0.47 | -0.52 | -0.57 | -0.59 | -0.45 | -0.40 | -0.39 | -0.42 |
| Ethiopia | G1905     | 1              | 0.63 | 0.07  | -0.16 | -0.27 | -0.34 | -0.39 | -0.40 | -0.40 | -0.44 | -0.47 | -0.53 | -0.58 | -0.59 | -0.45 | -0.40 | -0.39 | -0.42 |
| Ethiopia | G1906     | 1              | 0.60 | 0.05  | -0.17 | -0.27 | -0.35 | -0.40 | -0.40 | -0.40 | -0.44 | -0.47 | -0.53 | -0.58 | -0.58 | -0.44 | -0.40 | -0.39 | -0.42 |
| Ethiopia | G1907     | 1              | 0.51 | -0.01 | -0.21 | -0.31 | -0.38 | -0.42 | -0.42 | -0.43 | -0.47 | -0.50 | -0.55 | -0.59 | -0.59 | -0.44 | -0.40 | -0.39 | -0.42 |
| Ethiopia | G4951     | 1              | 0.99 | 0.99  | 0.98  | 0.96  | 0.91  | 0.84  | 0.78  | 0.72  | 0.66  | 0.61  | 0.48  | 0.36  | 0.26  | 0.16  | 0.08  | -0.05 | -0.13 |
| Ethiopia | G4953     | 1              | 0.91 | 0.53  | 0.13  | -0.14 | -0.30 | -0.40 | -0.50 | -0.58 | -0.64 | -0.70 | -0.82 | -0.92 | -1.03 | -0.94 | -0.85 | -1.01 | -1.21 |
| Ethiopia | G4954     | 1              | 1.00 | 0.94  | 0.82  | 0.70  | 0.60  | 0.50  | 0.42  | 0.36  | 0.31  | 0.26  | 0.22  | 0.16  | 0.11  | 0.09  | 0.07  | 0.07  | 0.07  |
| Ethiopia | G4957     | 1              | 0.98 | 0.80  | 0.46  | 0.14  | -0.09 | -0.24 | -0.36 | -0.44 | -0.51 | -0.57 | -0.63 | -0.69 | -0.74 | -0.72 | -0.61 | -0.53 | -0.59 |
| Ethiopia | G4960     | 1              | 0.99 | 0.93  | 0.79  | 0.63  | 0.45  | 0.25  | 0.03  | -0.21 | -0.44 | -0.67 | -1.04 | -1.31 | -1.53 | -1.68 | -1.72 | -1.55 | -1.40 |
| Ethiopia | G4965     | 1              | 0.99 | 0.96  | 0.93  | 0.90  | 0.85  | 0.80  | 0.75  | 0.70  | 0.65  | 0.60  | 0.52  | 0.46  | 0.41  | 0.37  | 0.37  | 0.30  | 0.21  |
| Ethiopia | G4969     | 1              | 0.98 | 0.88  | 0.71  | 0.53  | 0.34  | 0.12  | -0.13 | -0.37 | -0.61 | -0.83 | -1.18 | -1.45 | -1.65 | -1.78 | -1.80 | -1.63 | -1.52 |
| Ethiopia | G4977     | 1              | 0.97 | 0.78  | 0.41  | 0.01  | -0.30 | -0.54 | -0.70 | -0.83 | -0.93 | -1.01 | -1.12 | -1.24 | -1.31 | -1.24 | -1.08 | -0.94 | -1.01 |
| Ethiopia | G4979     | 1              | 0.94 | 0.80  | 0.66  | 0.50  | 0.29  | 0.04  | -0.22 | -0.47 | -0.72 | -0.92 | -1.24 | -1.48 | -1.66 | -1.76 | -1.78 | -1.56 | -1.49 |
| Ethiopia | G4980     | 1              | 0.97 | 0.82  | 0.55  | 0.29  | 0.08  | -0.08 | -0.20 | -0.29 | -0.35 | -0.42 | -0.53 | -0.61 | -0.66 | -0.59 | -0.42 | -0.36 | -0.41 |
| Ethiopia | G4983     | 1              | 0.96 | 0.77  | 0.50  | 0.26  | 0.04  | -0.14 | -0.29 | -0.41 | -0.52 | -0.60 | -0.73 | -0.82 | -0.90 | -0.82 | -0.68 | -0.49 | -0.55 |
| Ethiopia | G5056     | 1              | 0.99 | 0.97  | 0.96  | 0.95  | 0.95  | 0.94  | 0.94  | 0.93  | 0.92  | 0.90  | 0.84  | 0.73  | 0.60  | 0.47  | 0.35  | 0.14  | 0.04  |
| Ethiopia | G5068     | 1              | 0.67 | 0.39  | 0.36  | 0.31  | 0.23  | 0.23  | 0.26  | 0.25  | 0.20  | 0.22  | 0.14  | 0.15  | 0.11  | 0.17  | 0.14  | 0.14  | 0.09  |
| Ethiopia | G5076     | 1              | 0.30 | -0.13 | -0.28 | -0.37 | -0.44 | -0.48 | -0.47 | -0.49 | -0.53 | -0.56 | -0.61 | -0.65 | -0.61 | -0.46 | -0.43 | -0.42 | -0.45 |
| Ethiopia | G5081     | 1              | 0.34 | -0.09 | -0.25 | -0.34 | -0.40 | -0.44 | -0.44 | -0.45 | -0.49 | -0.52 | -0.56 | -0.60 | -0.57 | -0.43 | -0.40 | -0.39 | -0.41 |
| Ethiopia | G5082     | 1              | 0.89 | 0.77  | 0.66  | 0.60  | 0.58  | 0.57  | 0.49  | 0.50  | 0.51  | 0.46  | 0.45  | 0.38  | 0.40  | 0.37  | 0.37  | 0.27  | 0.25  |
| Ethiopia | G5115     | 1              | 0.78 | 0.32  | 0.01  | -0.25 | -0.46 | -0.62 | -0.74 | -0.82 | -0.89 | -0.96 | -1.04 | -1.09 | -1.13 | -1.17 | -1.18 | -1.25 | -1.31 |

| Country  | GloFAS ID | Station filter | LT1  | LT2  | LT3   | LT4   | LT5   | LT6   | LT7   | LT8   | LT9   | LT10  | LT12  | LT14  | LT16  | LT18  | LT20  | LT25  | L30   |
|----------|-----------|----------------|------|------|-------|-------|-------|-------|-------|-------|-------|-------|-------|-------|-------|-------|-------|-------|-------|
| Ethiopia | G5118     | 1              | 0.99 | 0.86 | 0.63  | 0.41  | 0.21  | 0.04  | -0.07 | -0.15 | -0.22 | -0.27 | -0.36 | -0.43 | -0.47 | -0.42 | -0.31 | -0.28 | -0.32 |
| Ethiopia | G5141     | 1              | 1.00 | 0.92 | 0.69  | 0.42  | 0.15  | -0.09 | -0.28 | -0.43 | -0.56 | -0.66 | -0.79 | -0.88 | -0.94 | -0.99 | -0.99 | -0.92 | -0.96 |
| Ethiopia | G5142     | 1              | 1.00 | 0.97 | 0.86  | 0.64  | 0.39  | 0.16  | -0.03 | -0.18 | -0.30 | -0.38 | -0.48 | -0.57 | -0.62 | -0.65 | -0.60 | -0.37 | -0.35 |
| Ethiopia | G5145     | 1              | 1.00 | 0.93 | 0.72  | 0.45  | 0.19  | -0.06 | -0.27 | -0.43 | -0.56 | -0.67 | -0.80 | -0.90 | -0.96 | -1.01 | -1.01 | -0.89 | -0.92 |
| Ethiopia | G6107     | 1              | 0.83 | 0.51 | 0.25  | 0.03  | -0.14 | -0.29 | -0.40 | -0.49 | -0.57 | -0.64 | -0.73 | -0.81 | -0.81 | -0.61 | -0.54 | -0.64 | -0.76 |
| Ethiopia | G6108     | 1              | 0.38 | 0.09 | -0.04 | -0.11 | -0.14 | -0.19 | -0.23 | -0.24 | -0.26 | -0.30 | -0.31 | -0.35 | -0.35 | -0.37 | -0.41 | -0.50 | -0.56 |
| Ethiopia | G6109     | 1              | 0.71 | 0.37 | 0.11  | -0.08 | -0.23 | -0.37 | -0.47 | -0.56 | -0.66 | -0.77 | -0.90 | -1.04 | -1.10 | -1.09 | -1.13 | -1.33 | -1.46 |
| Ethiopia | G6110     | 1              | 0.71 | 0.38 | 0.15  | -0.02 | -0.15 | -0.25 | -0.34 | -0.43 | -0.49 | -0.54 | -0.61 | -0.64 | -0.48 | -0.19 | -0.10 | -0.07 | -0.07 |
| Ethiopia | G6111     | 1              | 0.82 | 0.55 | 0.34  | 0.19  | 0.10  | 0.02  | -0.06 | -0.11 | -0.14 | -0.20 | -0.27 | -0.32 | -0.27 | -0.11 | -0.09 | -0.15 | -0.20 |
| Ethiopia | G6112     | 0              | 0.57 | 0.37 | 0.25  | 0.20  | 0.12  | 0.08  | 0.05  | 0.02  | -0.01 | -0.06 | -0.12 | -0.17 | -0.17 | -0.15 | -0.19 | -0.31 | -0.39 |
| Gabon    | G5248     | 1              | 0.99 | 0.97 | 0.91  | 0.81  | 0.67  | 0.49  | 0.29  | 0.08  | -0.13 | -0.33 | -0.67 | -0.91 | -1.08 | -1.20 | -1.28 | -1.38 | -1.39 |
| Gabon    | G5251     | 1              | 0.98 | 0.93 | 0.81  | 0.65  | 0.45  | 0.19  | -0.13 | -0.45 | -0.73 | -0.97 | -1.33 | -1.55 | -1.71 | -1.81 | -1.87 | -1.88 | -1.84 |
| Gabon    | G5267     | 1              | 0.99 | 0.95 | 0.89  | 0.82  | 0.71  | 0.57  | 0.38  | 0.16  | -0.09 | -0.34 | -0.78 | -1.09 | -1.30 | -1.45 | -1.56 | -1.64 | -1.59 |
| Gabon    | G5272     | 1              | 0.96 | 0.82 | 0.66  | 0.54  | 0.46  | 0.40  | 0.34  | 0.28  | 0.22  | 0.18  | 0.10  | 0.06  | 0.02  | 0.00  | -0.02 | -0.07 | -0.12 |
| Ghana    | G1055     | 1              | 0.99 | 0.96 | 0.92  | 0.88  | 0.83  | 0.77  | 0.72  | 0.67  | 0.60  | 0.55  | 0.42  | 0.28  | 0.12  | -0.02 | -0.19 | -0.62 | -0.94 |
| Ghana    | G1056     | 1              | 1.00 | 0.99 | 0.97  | 0.93  | 0.88  | 0.81  | 0.74  | 0.67  | 0.59  | 0.51  | 0.34  | 0.19  | 0.06  | -0.06 | -0.14 | -0.18 | -0.23 |
| Ghana    | G1058     | 1              | 1.00 | 0.99 | 0.98  | 0.95  | 0.91  | 0.87  | 0.82  | 0.76  | 0.71  | 0.66  | 0.56  | 0.45  | 0.33  | 0.23  | 0.14  | -0.10 | -0.37 |
| Ghana    | G1059     | 1              | 1.00 | 0.99 | 0.98  | 0.97  | 0.94  | 0.90  | 0.85  | 0.80  | 0.74  | 0.68  | 0.55  | 0.42  | 0.29  | 0.15  | 0.01  | -0.25 | -0.50 |
| Ghana    | G1061     | 1              | 1.00 | 0.98 | 0.94  | 0.88  | 0.82  | 0.75  | 0.68  | 0.59  | 0.51  | 0.44  | 0.32  | 0.22  | 0.11  | 0.03  | -0.01 | -0.05 | -0.07 |
| Ghana    | G1064     | 1              | 1.00 | 1.00 | 0.99  | 0.97  | 0.94  | 0.91  | 0.86  | 0.81  | 0.74  | 0.66  | 0.51  | 0.34  | 0.17  | 0.03  | -0.10 | -0.33 | -0.45 |
| Ghana    | G1068     | 1              | 0.99 | 0.96 | 0.91  | 0.84  | 0.78  | 0.73  | 0.67  | 0.59  | 0.54  | 0.49  | 0.38  | 0.28  | 0.19  | 0.13  | 0.07  | -0.03 | -0.09 |
| Ghana    | G1078     | 1              | 0.98 | 0.94 | 0.89  | 0.86  | 0.82  | 0.77  | 0.75  | 0.71  | 0.67  | 0.63  | 0.55  | 0.48  | 0.42  | 0.41  | 0.35  | 0.23  | 0.10  |
| Ghana    | G1108     | 1              | 0.88 | 0.73 | 0.59  | 0.53  | 0.47  | 0.42  | 0.35  | 0.33  | 0.31  | 0.27  | 0.24  | 0.21  | 0.21  | 0.17  | 0.16  | 0.11  | 0.08  |
| Ghana    | G5029     | 1              | 1.00 | 0.98 | 0.96  | 0.92  | 0.87  | 0.83  | 0.79  | 0.74  | 0.68  | 0.62  | 0.48  | 0.35  | 0.21  | 0.10  | 0.00  | -0.21 | -0.32 |
| Ghana    | G5032     | 1              | 0.99 | 0.97 | 0.94  | 0.90  | 0.86  | 0.81  | 0.75  | 0.71  | 0.67  | 0.63  | 0.55  | 0.48  | 0.43  | 0.38  | 0.35  | 0.27  | 0.19  |
| Ghana    | G5096     | 1              | 1.00 | 1.00 | 0.99  | 0.99  | 0.99  | 0.98  | 0.98  | 0.97  | 0.97  | 0.97  | 0.96  | 0.95  | 0.94  | 0.93  | 0.91  | 0.89  | 0.86  |
| Guinea   | G1057     | 1              | 0.99 | 0.97 | 0.93  | 0.89  | 0.83  | 0.75  | 0.68  | 0.62  | 0.57  | 0.52  | 0.45  | 0.39  | 0.35  | 0.32  | 0.30  | 0.23  | 0.18  |
| Guinea   | G1787     | 1              | 0.95 | 0.83 | 0.69  | 0.59  | 0.51  | 0.43  | 0.37  | 0.33  | 0.30  | 0.27  | 0.20  | 0.16  | 0.15  | 0.11  | 0.09  | 0.03  | 0.02  |
| Kenya    | G5170     | 1              | 0.96 | 0.58 | 0.10  | -0.20 | -0.36 | -0.45 | -0.51 | -0.54 | -0.55 | -0.56 | -0.61 | -0.64 | -0.64 | -0.67 | -0.67 | -0.67 | -0.67 |
| Kenya    | G5171     | 1              | 0.99 | 0.86 | 0.49  | 0.13  | -0.14 | -0.34 | -0.46 | -0.54 | -0.60 | -0.63 | -0.70 | -0.75 | -0.79 | -0.79 | -0.85 | -0.84 | -0.87 |
| Kenya    | G5173     | 1              | 0.98 | 0.88 | 0.81  | 0.73  | 0.65  | 0.59  | 0.55  | 0.51  | 0.49  | 0.49  | 0.44  | 0.39  | 0.36  | 0.34  | 0.28  | 0.25  | 0.21  |
| Kenya    | G5197     | 1              | 0.99 | 0.98 | 0.94  | 0.87  | 0.80  | 0.73  | 0.67  | 0.60  | 0.56  | 0.52  | 0.44  | 0.38  | 0.32  | 0.26  | 0.23  | 0.16  | 0.13  |
| Kenya    | G5198     | 1              | 1.00 | 0.97 | 0.90  | 0.84  | 0.80  | 0.75  | 0.69  | 0.67  | 0.63  | 0.59  | 0.53  | 0.48  | 0.44  | 0.43  | 0.44  | 0.43  | 0.43  |
| Kenya    | G5208     | 1              | 1.00 | 0.99 | 0.98  | 0.96  | 0.92  | 0.87  | 0.82  | 0.76  | 0.71  | 0.66  | 0.56  | 0.50  | 0.43  | 0.37  | 0.32  | 0.23  | 0.19  |
| Kenya    | G5210     | 1              | 0.99 | 0.96 | 0.86  | 0.69  | 0.54  | 0.45  | 0.37  | 0.28  | 0.22  | 0.19  | 0.10  | 0.08  | 0.02  | -0.01 | -0.02 | -0.03 | -0.06 |
| Kenya    | G5299     | 1              | 0.93 | 0.80 | 0.71  | 0.66  | 0.62  | 0.59  | 0.58  | 0.55  | 0.53  | 0.52  | 0.48  | 0.46  | 0.44  | 0.42  | 0.40  | 0.35  | 0.31  |
| Kenya    | G5305     | 1              | 1.00 | 0.98 | 0.92  | 0.86  | 0.83  | 0.76  | 0.68  | 0.65  | 0.59  | 0.52  | 0.48  | 0.40  | 0.38  | 0.34  | 0.33  | 0.30  | 0.30  |
| Kenya    | G5326     | 1              | 0.99 | 0.99 | 0.98  | 0.95  | 0.91  | 0.85  | 0.77  | 0.68  | 0.61  | 0.54  | 0.43  | 0.37  | 0.31  | 0.28  | 0.26  | 0.20  | 0.16  |
| Kenya    | G5332     | 1              | 1.00 | 1.00 | 0.99  | 0.99  | 0.97  | 0.93  | 0.88  | 0.85  | 0.82  | 0.77  | 0.69  | 0.60  | 0.56  | 0.52  | 0.50  | 0.44  | 0.43  |

| Country    | GloFAS ID | Station filter | LT1  | LT2  | LT3  | LT4   | LT5   | LT6   | LT7   | LT8   | LT9   | LT10  | LT12  | LT14  | LT16  | LT18  | LT20  | LT25  | L30   |
|------------|-----------|----------------|------|------|------|-------|-------|-------|-------|-------|-------|-------|-------|-------|-------|-------|-------|-------|-------|
| Lesotho    | G1469     | 1              | 0.98 | 0.93 | 0.79 | 0.68  | 0.60  | 0.52  | 0.44  | 0.36  | 0.32  | 0.28  | 0.21  | 0.14  | 0.10  | 0.07  | 0.04  | -0.04 | -0.04 |
| Lesotho    | G1472     | 1              | 0.96 | 0.87 | 0.80 | 0.70  | 0.63  | 0.56  | 0.50  | 0.43  | 0.37  | 0.33  | 0.26  | 0.20  | 0.14  | 0.12  | 0.07  | -0.04 | -0.05 |
| Libya      | G4337     | 0              | 1.00 | 1.00 | 1.00 | 0.99  | 0.98  | 0.97  | 0.97  | 0.96  | 0.96  | 0.95  | 0.88  | 0.65  | 0.69  | 0.73  | 0.63  | -0.14 | 0.14  |
| Libya      | G4338     | 1              | 1.00 | 0.99 | 0.98 | 0.98  | 0.97  | 0.95  | 0.93  | 0.90  | 0.87  | 0.84  | 0.77  | 0.72  | 0.65  | 0.59  | 0.53  | 0.38  | 0.33  |
| Libya      | G4414     | 0              | -    | -    | -    | -     | -     | -     | -     | -     | -     | -     | -     | -     | -     | -     | -     | -     | -     |
| Libya      | G4415     | 0              | -    | -    | -    | -     | -     | -     | -     | -     | -     | -     | -     | -     | -     | -     | -     | -     | -     |
| Libya      | G4438     | 0              | -    | -    | -    | -     | -     | -     | -     | -     | -     | -     | -     | -     | -     | -     | -     | -     | -     |
| Libya      | G4442     | 0              | -    | -    | -    | -     | -     | -     | -     | -     | -     | -     | -     | -     | -     | -     | -     | -     | -     |
| Libya      | G4460     | 0              | -    | -    | -    | -     | -     | -     | -     | -     | -     | -     | -     | -     | -     | -     | -     | -     | -     |
| Libya      | G4461     | 0              | -    | -    | -    | -     | -     | -     | -     | -     | -     | -     | -     | -     | -     | -     | -     | -     | -     |
| Libya      | G4463     | 0              | -    | -    | -    | -     | -     | -     | -     | -     | -     | -     | -     | -     | -     | -     | -     | -     | -     |
| Libya      | G4464     | 0              | -    | -    | -    | -     | -     | -     | -     | -     | -     | -     | -     | -     | -     | -     | -     | -     | -     |
| Libya      | G4479     | 0              | -    | -    | -    | -     | -     | -     | -     | -     | -     | -     | -     | -     | -     | -     | -     | -     | -     |
| Libya      | G4480     | 0              | -    | -    | -    | -     | -     | -     | -     | -     | -     | -     | -     | -     | -     | -     | -     | -     | -     |
| Libya      | G4499     | 0              | -    | -    | -    | -     | -     | -     | -     | -     | -     | -     | -     | -     | -     | -     | -     | -     | -     |
| Libya      | G4506     | 0              | -    | -    | -    | -     | -     | -     | -     | -     | -     | -     | -     | -     | -     | -     | -     | -     | -     |
| Libya      | G4535     | 0              | -    | -    | -    | -     | -     | -     | -     | -     | -     | -     | -     | -     | -     | -     | -     | -     | -     |
| Libya      | G4536     | 1              | 1.00 | 1.00 | 1.00 | 1.00  | 1.00  | 1.00  | 1.00  | 1.00  | 0.99  | 0.99  | 0.99  | 0.99  | 0.99  | 0.98  | 0.98  | 0.83  | 0.88  |
| Libya      | G4545     | 1              | 1.00 | 1.00 | 1.00 | 1.00  | 1.00  | 1.00  | 1.00  | 1.00  | 0.99  | 0.99  | 0.99  | 0.99  | 0.99  | 0.98  | 0.98  | 0.86  | 0.90  |
| Libya      | G4546     | 0              | -    | -    | -    | -     | -     | -     | -     | -     | -     | -     | -     | -     | -     | -     | -     | -     | -     |
| Libya      | G4588     | 0              | -    | -    | -    | -     | -     | -     | -     | -     | -     | -     | -     | -     | -     | -     | -     | -     | -     |
| Libya      | G4589     | 0              | -    | -    | -    | -     | -     | -     | -     | -     | -     | -     | -     | -     | -     | -     | -     | -     | -     |
| Libya      | G4598     | 0              | -    | -    | -    | -     | -     | -     | -     | -     | -     | -     | -     | -     | -     | -     | -     | -     | -     |
| Libya      | G4603     | 0              | -    | -    | -    | -     | -     | -     | -     | -     | -     | -     | -     | -     | -     | -     | -     | -     | -     |
| Libya      | G4605     | 1              | 1.00 | 1.00 | 1.00 | 1.00  | 0.99  | 0.99  | 0.99  | 0.99  | 0.99  | 0.99  | 0.98  | 0.95  | 0.90  | 0.84  | 0.77  | 0.61  | 0.41  |
| Madagascar | G1916     | 1              | 0.78 | 0.66 | 0.58 | 0.54  | 0.49  | 0.42  | 0.37  | 0.33  | 0.30  | 0.29  | 0.23  | 0.20  | 0.18  | 0.14  | 0.14  | 0.13  | 0.10  |
| Madagascar | G5678     | 1              | 0.89 | 0.74 | 0.64 | 0.59  | 0.59  | 0.52  | 0.44  | 0.38  | 0.36  | 0.35  | 0.30  | 0.26  | 0.23  | 0.17  | 0.15  | 0.16  | 0.12  |
| Madagascar | G5699     | 1              | 0.98 | 0.91 | 0.80 | 0.69  | 0.65  | 0.62  | 0.55  | 0.48  | 0.45  | 0.44  | 0.36  | 0.31  | 0.27  | 0.22  | 0.20  | 0.17  | 0.13  |
| Madagascar | G5703     | 1              | 0.98 | 0.91 | 0.81 | 0.73  | 0.67  | 0.63  | 0.58  | 0.53  | 0.47  | 0.44  | 0.36  | 0.31  | 0.25  | 0.20  | 0.16  | 0.13  | 0.09  |
| Madagascar | G5710     | 1              | 0.96 | 0.85 | 0.75 | 0.68  | 0.62  | 0.58  | 0.54  | 0.49  | 0.43  | 0.40  | 0.33  | 0.29  | 0.22  | 0.19  | 0.15  | 0.12  | 0.07  |
| Madagascar | G5711     | 1              | 0.97 | 0.87 | 0.74 | 0.65  | 0.60  | 0.56  | 0.50  | 0.45  | 0.42  | 0.39  | 0.31  | 0.27  | 0.22  | 0.16  | 0.14  | 0.12  | 0.09  |
| Madagascar | G5791     | 1              | 0.90 | 0.74 | 0.65 | 0.58  | 0.48  | 0.44  | 0.42  | 0.35  | 0.30  | 0.30  | 0.23  | 0.20  | 0.14  | 0.13  | 0.08  | 0.06  | 0.03  |
| Madagascar | G5797     | 1              | 0.90 | 0.76 | 0.69 | 0.64  | 0.57  | 0.51  | 0.49  | 0.44  | 0.38  | 0.36  | 0.30  | 0.22  | 0.15  | 0.11  | 0.05  | 0.00  | -0.03 |
| Malawi     | G1277     | 1              | 0.79 | 0.45 | 0.17 | -0.05 | -0.23 | -0.37 | -0.48 | -0.58 | -0.65 | -0.72 | -0.85 | -0.93 | -0.97 | -0.94 | -0.88 | -0.80 | -0.74 |
| Malawi     | G1307     | 1              | 0.95 | 0.85 | 0.77 | 0.69  | 0.61  | 0.54  | 0.48  | 0.44  | 0.39  | 0.34  | 0.27  | 0.21  | 0.18  | 0.15  | 0.13  | 0.09  | 0.06  |
| Malawi     | G1724     | 1              | 0.97 | 0.92 | 0.88 | 0.84  | 0.81  | 0.77  | 0.75  | 0.73  | 0.71  | 0.69  | 0.65  | 0.62  | 0.60  | 0.58  | 0.57  | 0.50  | 0.44  |
| Malawi     | G2001     | 1              | 0.98 | 0.94 | 0.91 | 0.89  | 0.87  | 0.84  | 0.83  | 0.81  | 0.80  | 0.78  | 0.75  | 0.72  | 0.70  | 0.68  | 0.66  | 0.59  | 0.51  |
| Mali       | G0959     | 1              | 1.00 | 1.00 | 1.00 | 1.00  | 1.00  | 1.00  | 0.99  | 0.99  | 0.99  | 0.99  | 0.98  | 0.98  | 0.97  | 0.95  | 0.92  | 0.78  | 0.59  |
| Mali       | G0960     | 1              | 1.00 | 0.99 | 0.99 | 0.99  | 0.99  | 0.99  | 0.99  | 0.99  | 0.98  | 0.98  | 0.98  | 0.97  | 0.96  | 0.95  | 0.93  | 0.80  | 0.62  |

| Country | GloFAS ID | Station filter | LT1  | LT2  | LT3  | LT4  | LT5  | LT6   | LT7   | LT8    | LT9    | LT10   | LT12   | LT14   | LT16  | LT18  | LT20  | LT25  | L30   |
|---------|-----------|----------------|------|------|------|------|------|-------|-------|--------|--------|--------|--------|--------|-------|-------|-------|-------|-------|
| Mali    | G0963     | 1              | 0.88 | 0.86 | 0.82 | 0.55 | 0.47 | 0.43  | 0.37  | 0.30   | 0.27   | 0.28   | 0.16   | 0.11   | -0.06 | 0.09  | 0.17  | 0.26  | 0.21  |
| Mali    | G0966     | 1              | 1.00 | 1.00 | 1.00 | 0.99 | 0.99 | 0.99  | 0.99  | 0.99   | 0.99   | 0.99   | 0.98   | 0.98   | 0.97  | 0.95  | 0.93  | 0.80  | 0.62  |
| Mali    | G0968     | 1              | 1.00 | 1.00 | 1.00 | 1.00 | 1.00 | 1.00  | 0.99  | 0.99   | 0.99   | 0.99   | 0.98   | 0.98   | 0.96  | 0.94  | 0.90  | 0.75  | 0.56  |
| Mali    | G0970     | 1              | 1.00 | 1.00 | 0.94 | 0.64 | 0.05 | -1.06 | -4.58 | -13.06 | -21.03 | -24.70 | -42.02 | -68.73 | -     | -     | -     | -     | -     |
| Mali    | G0976     | 1              | 1.00 | 1.00 | 1.00 | 1.00 | 1.00 | 1.00  | 1.00  | 1.00   | 1.00   | 1.00   | 1.00   | 1.00   | 1.00  | 1.00  | 1.00  | 0.99  | 0.98  |
| Mali    | G0979     | 1              | 1.00 | 1.00 | 0.99 | 0.99 | 0.99 | 0.99  | 0.98  | 0.98   | 0.98   | 0.98   | 0.96   | 0.94   | 0.90  | 0.84  | 0.77  | 0.57  | 0.36  |
| Mali    | G0988     | 1              | 1.00 | 0.97 | 0.93 | 0.85 | 0.77 | 0.71  | 0.63  | 0.55   | 0.52   | 0.46   | 0.36   | 0.26   | 0.13  | 0.07  | 0.07  | 0.08  | 0.12  |
| Mali    | G0994     | 1              | 1.00 | 1.00 | 0.99 | 0.99 | 0.99 | 0.98  | 0.98  | 0.97   | 0.97   | 0.95   | 0.91   | 0.85   | 0.77  | 0.68  | 0.59  | 0.37  | 0.22  |
| Mali    | G0995     | 1              | 0.99 | 0.97 | 0.92 | 0.85 | 0.78 | 0.72  | 0.65  | 0.59   | 0.56   | 0.51   | 0.42   | 0.33   | 0.22  | 0.16  | 0.16  | 0.16  | 0.18  |
| Mali    | G0998     | 1              | 1.00 | 1.00 | 0.99 | 0.96 | 0.88 | 0.82  | 0.77  | 0.72   | 0.67   | 0.63   | 0.52   | 0.39   | 0.26  | 0.18  | 0.14  | 0.11  | 0.12  |
| Mali    | G0999     | 1              | 1.00 | 1.00 | 1.00 | 1.00 | 0.99 | 0.99  | 0.98  | 0.97   | 0.94   | 0.91   | 0.82   | 0.71   | 0.61  | 0.52  | 0.44  | 0.30  | 0.22  |
| Mali    | G1000     | 1              | 1.00 | 0.99 | 0.99 | 0.99 | 0.98 | 0.98  | 0.97  | 0.96   | 0.95   | 0.92   | 0.86   | 0.77   | 0.67  | 0.57  | 0.48  | 0.32  | 0.22  |
| Mali    | G1001     | 1              | 1.00 | 1.00 | 1.00 | 1.00 | 0.99 | 0.99  | 0.99  | 0.98   | 0.98   | 0.97   | 0.94   | 0.90   | 0.84  | 0.78  | 0.70  | 0.43  | 0.18  |
| Mali    | G1002     | 1              | 1.00 | 1.00 | 1.00 | 1.00 | 0.99 | 0.99  | 0.98  | 0.95   | 0.92   | 0.88   | 0.78   | 0.67   | 0.57  | 0.49  | 0.41  | 0.29  | 0.21  |
| Mali    | G1003     | 1              | 0.99 | 0.96 | 0.90 | 0.84 | 0.77 | 0.71  | 0.64  | 0.60   | 0.56   | 0.50   | 0.42   | 0.32   | 0.22  | 0.18  | 0.18  | 0.18  | 0.21  |
| Mali    | G1005     | 1              | 1.00 | 1.00 | 1.00 | 0.99 | 0.98 | 0.95  | 0.91  | 0.87   | 0.81   | 0.75   | 0.63   | 0.53   | 0.45  | 0.38  | 0.33  | 0.23  | 0.17  |
| Mali    | G1009     | 1              | 0.97 | 0.91 | 0.83 | 0.76 | 0.68 | 0.53  | 0.45  | 0.41   | 0.33   | 0.27   | 0.20   | 0.10   | 0.05  | 0.05  | 0.08  | 0.08  | 0.10  |
| Mali    | G1010     | 1              | 1.00 | 1.00 | 1.00 | 0.99 | 0.99 | 0.98  | 0.97  | 0.96   | 0.94   | 0.91   | 0.84   | 0.75   | 0.61  | 0.47  | 0.35  | 0.08  | -0.05 |
| Mali    | G1011     | 1              | 0.96 | 0.90 | 0.84 | 0.74 | 0.64 | 0.52  | 0.41  | 0.37   | 0.27   | 0.19   | 0.04   | -0.14  | -0.31 | -0.33 | -0.34 | -0.32 | -0.27 |
| Mali    | G1014     | 1              | 1.00 | 0.98 | 0.93 | 0.84 | 0.73 | 0.65  | 0.55  | 0.41   | 0.30   | 0.20   | -0.02  | -0.26  | -0.43 | -0.53 | -0.56 | -0.54 | -0.45 |
| Mali    | G1015     | 1              | 0.97 | 0.91 | 0.80 | 0.68 | 0.57 | 0.50  | 0.45  | 0.41   | 0.39   | 0.39   | 0.29   | 0.25   | 0.24  | 0.25  | 0.24  | 0.22  | 0.17  |
| Mali    | G1016     | 1              | 1.00 | 0.99 | 0.99 | 0.98 | 0.96 | 0.93  | 0.89  | 0.84   | 0.80   | 0.74   | 0.59   | 0.44   | 0.31  | 0.19  | 0.08  | -0.04 | -0.09 |
| Mali    | G1017     | 1              | 0.98 | 0.96 | 0.92 | 0.89 | 0.87 | 0.86  | 0.84  | 0.83   | 0.83   | 0.81   | 0.80   | 0.77   | 0.77  | 0.74  | 0.74  | 0.70  | 0.67  |
| Mali    | G1023     | 1              | 0.99 | 0.95 | 0.87 | 0.78 | 0.69 | 0.63  | 0.56  | 0.51   | 0.46   | 0.43   | 0.36   | 0.30   | 0.26  | 0.23  | 0.19  | 0.14  | 0.09  |
| Mali    | G1029     | 1              | 1.00 | 0.98 | 0.94 | 0.89 | 0.84 | 0.79  | 0.72  | 0.65   | 0.58   | 0.51   | 0.41   | 0.30   | 0.20  | 0.15  | 0.13  | 0.04  | -0.04 |
| Mali    | G1034     | 1              | 0.98 | 0.95 | 0.87 | 0.78 | 0.69 | 0.62  | 0.57  | 0.52   | 0.48   | 0.45   | 0.41   | 0.37   | 0.34  | 0.30  | 0.28  | 0.26  | 0.22  |
| Mali    | G1037     | 1              | 0.98 | 0.91 | 0.79 | 0.68 | 0.59 | 0.53  | 0.49  | 0.45   | 0.41   | 0.38   | 0.34   | 0.31   | 0.27  | 0.25  | 0.22  | 0.20  | 0.17  |
| Mali    | G1040     | 1              | 0.98 | 0.88 | 0.68 | 0.54 | 0.43 | 0.31  | 0.20  | 0.11   | 0.03   | 0.01   | -0.04  | -0.15  | -0.19 | -0.16 | -0.10 | 0.00  | -0.01 |
| Mali    | G1041     | 1              | 0.99 | 0.96 | 0.93 | 0.89 | 0.84 | 0.79  | 0.76  | 0.71   | 0.67   | 0.62   | 0.55   | 0.48   | 0.42  | 0.38  | 0.34  | 0.28  | 0.23  |
| Mali    | G1046     | 1              | 0.97 | 0.90 | 0.79 | 0.68 | 0.61 | 0.53  | 0.47  | 0.42   | 0.38   | 0.36   | 0.30   | 0.26   | 0.22  | 0.18  | 0.14  | 0.09  | 0.06  |
| Mali    | G1048     | 1              | 0.99 | 0.96 | 0.93 | 0.89 | 0.84 | 0.79  | 0.75  | 0.71   | 0.66   | 0.62   | 0.55   | 0.48   | 0.42  | 0.38  | 0.34  | 0.28  | 0.23  |
| Mali    | G1049     | 1              | 1.00 | 0.98 | 0.93 | 0.86 | 0.78 | 0.68  | 0.58  | 0.50   | 0.44   | 0.39   | 0.29   | 0.20   | 0.13  | 0.10  | 0.08  | 0.01  | -0.04 |
| Mali    | G1050     | 1              | 1.00 | 0.98 | 0.93 | 0.88 | 0.81 | 0.75  | 0.68  | 0.63   | 0.58   | 0.53   | 0.43   | 0.35   | 0.31  | 0.26  | 0.20  | 0.12  | 0.07  |
| Mali    | G1784     | 1              | 1.00 | 1.00 | 0.99 | 0.99 | 0.99 | 0.99  | 0.99  | 0.99   | 0.99   | 0.98   | 0.98   | 0.97   | 0.96  | 0.95  | 0.92  | 0.78  | 0.60  |
| Mali    | G1785     | 1              | 1.00 | 1.00 | 1.00 | 1.00 | 1.00 | 1.00  | 1.00  | 1.00   | 1.00   | 1.00   | 1.00   | 1.00   | 1.00  | 0.99  | 0.99  | 0.99  | 0.96  |
| Mali    | G1786     | 1              | 1.00 | 1.00 | 0.99 | 0.98 | 0.95 | 0.90  | 0.85  | 0.78   | 0.72   | 0.65   | 0.55   | 0.47   | 0.39  | 0.33  | 0.28  | 0.21  | 0.14  |
| Mali    | G4726     | 0              | -    | -    | -    | -    | -    | -     | -     | -      | -      | -      | -      | -      | -     | -     | -     | -     | -     |
| Mali    | G4729     | 0              | -    | -    | -    | -    | -    | -     | -     | -      | -      | -      | -      | -      | -     | -     | -     | -     | -     |
| Mali    | G4730     | 0              | -    | -    | -    | -    | -    | -     | -     | -      | -      | -      | -      | -      | -     | -     | -     | -     | -     |

| Country    | GloFAS ID | Station filter | LT1  | LT2  | LT3   | LT4   | LT5   | LT6    | LT7    | LT8    | LT9    | LT10   | LT12   | LT14  | LT16   | LT18   | LT20   | LT25   | L30    |
|------------|-----------|----------------|------|------|-------|-------|-------|--------|--------|--------|--------|--------|--------|-------|--------|--------|--------|--------|--------|
| Mali       | G4731     | 1              | 1.00 | 0.99 | 0.99  | 0.98  | 0.98  | 0.97   | 0.96   | 0.96   | 0.96   | 0.94   | 0.76   | -0.14 | -0.53  | -0.80  | -1.26  | -1.22  | -1.50  |
| Mali       | G4732     | 1              | 1.00 | 0.98 | 0.97  | 0.95  | 0.95  | 0.94   | 0.90   | 0.78   | 0.49   | -0.08  | -2.46  | -6.61 | -13.04 | -17.74 | -24.40 | -40.08 | -42.28 |
| Mali       | G4733     | 1              | 1.00 | 0.99 | 0.99  | 0.99  | 0.98  | 0.97   | 0.96   | 0.95   | 0.94   | 0.92   | 0.90   | 0.87  | 0.82   | 0.75   | 0.68   | 0.54   | 0.35   |
| Mali       | G4734     | 0              | -    | -    | -     | -     | -     | -      | -      | -      | -      | -      | -      | -     | -      | -      | -      | -      | -      |
| Mali       | G4740     | 0              | -    | -    | -     | -     | -     | -      | -      | -      | -      | -      | -      | -     | -      | -      | -      | -      | -      |
| Mali       | G4782     | 0              | -    | -    | -     | -     | -     | -      | -      | -      | -      | -      | -      | -     | -      | -      | -      | -      | -      |
| Mali       | G4791     | 1              | 1.00 | 0.95 | 0.84  | 0.78  | 0.55  | 0.14   | -0.16  | -0.49  | -1.22  | -1.68  | -2.20  | -2.76 | -3.25  | -3.26  | -3.90  | -4.64  | -4.47  |
| Mali       | G4816     | 1              | 0.89 | 0.56 | -0.15 | -0.54 | -3.04 | -11.11 | -33.41 | -55.34 | -56.49 | -57.80 | -89.11 | -     | -95.17 | -81.11 | -70.84 | -87.46 | -84.89 |
| Mali       | G4829     | 1              | 1.00 | 1.00 | 1.00  | 1.00  | 1.00  | 1.00   | 1.00   | 1.00   | 1.00   | 1.00   | 1.00   | 0.99  | 0.99   | 0.99   | 0.99   | 0.96   | 0.89   |
| Mali       | G4830     | 1              | 1.00 | 1.00 | 1.00  | 0.99  | 0.99  | 0.97   | 0.94   | 0.90   | 0.89   | 0.87   | 0.78   | 0.58  | 0.15   | -0.23  | -0.65  | -2.43  | -4.09  |
| Mali       | G4842     | 1              | 1.00 | 0.99 | 0.99  | 0.97  | 0.81  | 0.57   | 0.36   | -0.03  | -1.25  | -1.83  | -2.03  | -3.31 | -4.38  | -5.51  | -6.44  | -8.67  | -10.29 |
| Mali       | G4845     | 1              | 1.00 | 1.00 | 1.00  | 0.99  | 0.98  | 0.93   | 0.78   | 0.57   | 0.34   | 0.06   | -0.47  | -1.29 | -1.97  | -3.14  | -3.79  | -4.64  | -5.10  |
| Mali       | G4850     | 1              | 0.99 | 0.97 | 0.96  | 0.70  | 0.38  | 0.32   | 0.28   | 0.17   | -0.05  | -0.53  | -1.10  | -2.40 | -3.15  | -3.49  | -4.08  | -5.69  | -6.19  |
| Mali       | G4851     | 1              | 1.00 | 1.00 | 1.00  | 1.00  | 1.00  | 0.99   | 0.99   | 0.98   | 0.98   | 0.96   | 0.89   | 0.73  | 0.59   | 0.46   | 0.36   | 0.15   | 0.03   |
| Mali       | G4857     | 1              | 1.00 | 1.00 | 1.00  | 1.00  | 1.00  | 1.00   | 1.00   | 1.00   | 1.00   | 1.00   | 1.00   | 1.00  | 1.00   | 1.00   | 0.99   | 0.99   | 0.97   |
| Mali       | G4859     | 1              | 1.00 | 1.00 | 1.00  | 0.99  | 0.99  | 0.96   | 0.93   | 0.89   | 0.85   | 0.80   | 0.65   | 0.44  | 0.09   | -0.17  | -0.37  | -1.16  | -1.61  |
| Mali       | G4872     | 1              | 1.00 | 0.99 | 0.99  | 0.99  | 0.99  | 0.99   | 0.98   | 0.98   | 0.98   | 0.98   | 0.98   | 0.97  | 0.97   | 0.97   | 0.96   | 0.94   | 0.88   |
| Mali       | G4880     | 1              | 1.00 | 0.98 | 0.95  | 0.89  | 0.80  | 0.73   | 0.66   | 0.58   | 0.52   | 0.48   | 0.35   | 0.25  | 0.13   | 0.06   | 0.03   | 0.05   | 0.09   |
| Mali       | G4881     | 1              | 0.98 | 0.95 | 0.89  | 0.79  | 0.70  | 0.61   | 0.50   | 0.42   | 0.37   | 0.28   | 0.18   | 0.08  | 0.03   | 0.00   | -0.02  | -0.03  | -0.01  |
| Mali       | G4883     | 1              | 1.00 | 0.98 | 0.95  | 0.88  | 0.80  | 0.73   | 0.66   | 0.58   | 0.53   | 0.48   | 0.37   | 0.27  | 0.15   | 0.08   | 0.06   | 0.08   | 0.11   |
| Mali       | G4886     | 1              | 1.00 | 1.00 | 0.97  | 0.90  | 0.81  | 0.76   | 0.67   | 0.53   | 0.44   | 0.36   | 0.13   | -0.04 | -0.22  | -0.30  | -0.39  | -0.38  | -0.36  |
| Mali       | G4890     | 1              | 0.99 | 0.95 | 0.86  | 0.75  | 0.66  | 0.57   | 0.45   | 0.37   | 0.30   | 0.24   | 0.06   | -0.11 | -0.20  | -0.22  | -0.23  | -0.18  | -0.13  |
| Mali       | G4930     | 1              | 1.00 | 0.99 | 0.97  | 0.94  | 0.86  | 0.79   | 0.71   | 0.65   | 0.53   | 0.42   | 0.17   | -0.01 | -0.16  | -0.24  | -0.28  | -0.22  | -0.19  |
| Morocco    | G4195     | 1              | 1.00 | 0.99 | 0.99  | 0.98  | 0.97  | 0.95   | 0.92   | 0.89   | 0.86   | 0.82   | 0.76   | 0.70  | 0.65   | 0.60   | 0.56   | 0.49   | 0.45   |
| Morocco    | G4199     | 1              | 0.99 | 0.93 | 0.83  | 0.72  | 0.60  | 0.50   | 0.41   | 0.33   | 0.26   | 0.19   | 0.08   | -0.01 | -0.06  | -0.10  | -0.11  | -0.13  | -0.15  |
| Morocco    | G4200     | 1              | 1.00 | 0.99 | 0.99  | 0.98  | 0.98  | 0.97   | 0.94   | 0.92   | 0.90   | 0.86   | 0.80   | 0.74  | 0.66   | 0.59   | 0.53   | 0.37   | 0.28   |
| Morocco    | G4341     | 1              | 1.00 | 1.00 | 0.97  | 0.94  | 0.93  | 0.90   | 0.84   | 0.81   | 0.80   | 0.77   | 0.69   | 0.64  | 0.62   | 0.57   | 0.58   | 0.51   | 0.49   |
| Morocco    | G4342     | 1              | 1.00 | 1.00 | 1.00  | 0.99  | 0.98  | 0.95   | 0.94   | 0.90   | 0.87   | 0.86   | 0.80   | 0.76  | 0.70   | 0.68   | 0.65   | 0.61   | 0.53   |
| Mauritania | G4746     | 1              | 1.00 | 0.99 | 0.97  | 0.95  | 0.93  | 0.92   | 0.82   | 0.33   | -1.15  | -0.90  | -0.39  | -1.39 | -5.30  | -5.37  | -4.56  | -5.39  | -7.94  |
| Mauritania | G4752     | 1              | 0.97 | 0.90 | 0.88  | 0.84  | 0.56  | 0.48   | 0.45   | 0.28   | 0.26   | 0.34   | 0.25   | 0.02  | -0.29  | -0.21  | -0.26  | -0.27  | -0.32  |
| Mauritania | G4861     | 1              | 1.00 | 0.95 | 0.81  | 0.80  | 0.67  | 0.45   | 0.29   | 0.19   | 0.12   | 0.03   | -0.02  | -0.16 | -0.29  | -0.28  | -0.27  | -0.22  | -0.13  |
| Mozambique | G1304     | 1              | 0.99 | 0.97 | 0.94  | 0.90  | 0.85  | 0.79   | 0.72   | 0.65   | 0.59   | 0.52   | 0.39   | 0.30  | 0.22   | 0.16   | 0.11   | 0.06   | 0.03   |
| Mozambique | G1363     | 1              | 1.00 | 0.99 | 0.97  | 0.95  | 0.93  | 0.90   | 0.88   | 0.85   | 0.83   | 0.80   | 0.76   | 0.72  | 0.68   | 0.66   | 0.64   | 0.60   | 0.57   |
| Mozambique | G1426     | 1              | 1.00 | 0.98 | 0.97  | 0.95  | 0.91  | 0.86   | 0.85   | 0.84   | 0.81   | 0.76   | 0.68   | 0.57  | 0.50   | 0.44   | 0.38   | 0.32   | 0.25   |
| Mozambique | G1431     | 1              | 1.00 | 1.00 | 0.99  | 0.98  | 0.98  | 0.96   | 0.92   | 0.88   | 0.88   | 0.87   | 0.81   | 0.73  | 0.65   | 0.57   | 0.53   | 0.43   | 0.34   |
| Mozambique | G1437     | 1              | 0.98 | 0.92 | 0.86  | 0.79  | 0.76  | 0.71   | 0.64   | 0.59   | 0.54   | 0.51   | 0.43   | 0.39  | 0.35   | 0.32   | 0.31   | 0.26   | 0.23   |
| Mozambique | G1782     | 1              | 0.99 | 0.95 | 0.89  | 0.80  | 0.70  | 0.63   | 0.57   | 0.52   | 0.47   | 0.43   | 0.35   | 0.28  | 0.22   | 0.19   | 0.15   | 0.10   | 0.08   |
| Mozambique | G1889     | 1              | 1.00 | 0.99 | 0.98  | 0.96  | 0.93  | 0.89   | 0.86   | 0.86   | 0.83   | 0.80   | 0.71   | 0.60  | 0.53   | 0.46   | 0.41   | 0.33   | 0.26   |
| Mozambique | G1890     | 1              | 1.00 | 0.99 | 0.97  | 0.95  | 0.91  | 0.87   | 0.86   | 0.84   | 0.78   | 0.71   | 0.61   | 0.50  | 0.41   | 0.34   | 0.29   | 0.21   | 0.17   |



| Country    | GloFAS ID | Station filter | LT1  | LT2  | LT3  | LT4  | LT5  | LT6  | LT7  | LT8  | LT9  | LT10 | LT12 | LT14 | LT16 | LT18 | LT20  | LT25  | L30   |
|------------|-----------|----------------|------|------|------|------|------|------|------|------|------|------|------|------|------|------|-------|-------|-------|
| Mozambique | G5603     | 1              | 0.98 | 0.93 | 0.88 | 0.83 | 0.78 | 0.72 | 0.66 | 0.59 | 0.53 | 0.47 | 0.37 | 0.30 | 0.24 | 0.20 | 0.17  | 0.11  | 0.05  |
| Mozambique | G5669     | 1              | 0.97 | 0.90 | 0.82 | 0.75 | 0.68 | 0.61 | 0.57 | 0.52 | 0.47 | 0.43 | 0.36 | 0.30 | 0.26 | 0.22 | 0.20  | 0.17  | 0.14  |
| Mozambique | G5670     | 1              | 0.95 | 0.83 | 0.71 | 0.61 | 0.53 | 0.45 | 0.39 | 0.34 | 0.29 | 0.25 | 0.16 | 0.11 | 0.07 | 0.01 | -0.05 | -0.12 | -0.15 |
| Mozambique | G5674     | 1              | 0.97 | 0.88 | 0.78 | 0.69 | 0.62 | 0.55 | 0.51 | 0.46 | 0.42 | 0.37 | 0.31 | 0.24 | 0.21 | 0.16 | 0.13  | 0.08  | 0.04  |
| Mozambique | G5677     | 1              | 1.00 | 1.00 | 1.00 | 0.99 | 0.99 | 0.98 | 0.98 | 0.97 | 0.96 | 0.95 | 0.93 | 0.91 | 0.90 | 0.88 | 0.87  | 0.84  | 0.82  |
| Mozambique | G5693     | 1              | 1.00 | 0.99 | 0.99 | 0.98 | 0.97 | 0.96 | 0.95 | 0.93 | 0.92 | 0.91 | 0.89 | 0.86 | 0.84 | 0.83 | 0.81  | 0.78  | 0.76  |
| Mozambique | G5694     | 1              | 0.99 | 0.95 | 0.88 | 0.80 | 0.72 | 0.65 | 0.58 | 0.53 | 0.48 | 0.42 | 0.32 | 0.24 | 0.19 | 0.15 | 0.13  | 0.09  | 0.06  |
| Mozambique | G5697     | 1              | 1.00 | 0.99 | 0.98 | 0.97 | 0.96 | 0.94 | 0.93 | 0.92 | 0.90 | 0.89 | 0.86 | 0.83 | 0.81 | 0.79 | 0.78  | 0.75  | 0.73  |
| Mozambique | G5698     | 1              | 0.99 | 0.96 | 0.89 | 0.82 | 0.74 | 0.70 | 0.65 | 0.59 | 0.55 | 0.51 | 0.42 | 0.35 | 0.28 | 0.25 | 0.21  | 0.16  | 0.12  |
| Mozambique | G5701     | 1              | 0.97 | 0.89 | 0.81 | 0.77 | 0.72 | 0.67 | 0.61 | 0.57 | 0.51 | 0.47 | 0.41 | 0.34 | 0.31 | 0.27 | 0.27  | 0.21  | 0.19  |
| Mozambique | G5702     | 1              | 0.98 | 0.92 | 0.84 | 0.77 | 0.71 | 0.67 | 0.63 | 0.56 | 0.50 | 0.48 | 0.41 | 0.33 | 0.28 | 0.25 | 0.23  | 0.17  | 0.13  |
| Mozambique | G5707     | 1              | 0.98 | 0.93 | 0.85 | 0.75 | 0.69 | 0.65 | 0.61 | 0.53 | 0.48 | 0.47 | 0.39 | 0.32 | 0.28 | 0.25 | 0.22  | 0.17  | 0.12  |
| Mozambique | G5708     | 1              | 0.98 | 0.92 | 0.85 | 0.74 | 0.68 | 0.63 | 0.57 | 0.54 | 0.52 | 0.47 | 0.39 | 0.32 | 0.27 | 0.25 | 0.21  | 0.18  | 0.15  |
| Mozambique | G5734     | 1              | 1.00 | 1.00 | 0.99 | 0.98 | 0.97 | 0.96 | 0.95 | 0.93 | 0.92 | 0.90 | 0.86 | 0.83 | 0.80 | 0.77 | 0.75  | 0.71  | 0.69  |
| Mozambique | G5735     | 1              | 1.00 | 0.99 | 0.95 | 0.91 | 0.87 | 0.83 | 0.80 | 0.77 | 0.74 | 0.72 | 0.67 | 0.63 | 0.60 | 0.58 | 0.56  | 0.52  | 0.46  |
| Mozambique | G5864     | 1              | 1.00 | 0.97 | 0.95 | 0.92 | 0.86 | 0.83 | 0.81 | 0.75 | 0.67 | 0.62 | 0.51 | 0.42 | 0.32 | 0.29 | 0.24  | 0.17  | 0.15  |
| Mozambique | G5865     | 1              | 0.99 | 0.97 | 0.93 | 0.88 | 0.86 | 0.80 | 0.75 | 0.70 | 0.64 | 0.60 | 0.47 | 0.41 | 0.33 | 0.30 | 0.25  | 0.17  | 0.13  |
| Mozambique | G5908     | 1              | 1.00 | 0.99 | 0.99 | 0.98 | 0.97 | 0.95 | 0.94 | 0.92 | 0.90 | 0.89 | 0.86 | 0.81 | 0.77 | 0.75 | 0.73  | 0.72  | 0.69  |
| Namibia    | G1372     | 1              | 1.00 | 0.99 | 0.99 | 0.99 | 0.99 | 0.99 | 0.98 | 0.97 | 0.96 | 0.94 | 0.88 | 0.81 | 0.74 | 0.67 | 0.61  | 0.49  | 0.39  |
| Namibia    | G1373     | 1              | 1.00 | 1.00 | 1.00 | 0.99 | 0.99 | 0.98 | 0.97 | 0.96 | 0.95 | 0.94 | 0.91 | 0.89 | 0.87 | 0.85 | 0.83  | 0.76  | 0.68  |
| Namibia    | G1378     | 1              | 1.00 | 1.00 | 1.00 | 1.00 | 0.99 | 0.99 | 0.99 | 0.98 | 0.98 | 0.97 | 0.96 | 0.95 | 0.94 | 0.93 | 0.92  | 0.88  | 0.84  |
| Namibia    | G1381     | 1              | 1.00 | 1.00 | 0.99 | 0.99 | 0.98 | 0.97 | 0.96 | 0.95 | 0.94 | 0.93 | 0.89 | 0.84 | 0.78 | 0.71 | 0.65  | 0.49  | 0.34  |
| Namibia    | G1391     | 1              | 0.94 | 0.83 | 0.73 | 0.65 | 0.58 | 0.53 | 0.50 | 0.45 | 0.41 | 0.40 | 0.36 | 0.34 | 0.27 | 0.23 | 0.18  | 0.14  | 0.06  |
| Namibia    | G1404     | 1              | 0.99 | 0.98 | 0.96 | 0.94 | 0.92 | 0.89 | 0.86 | 0.82 | 0.79 | 0.76 | 0.69 | 0.64 | 0.58 | 0.53 | 0.48  | 0.38  | 0.29  |
| Namibia    | G1406     | 1              | 1.00 | 0.99 | 0.97 | 0.94 | 0.92 | 0.90 | 0.88 | 0.86 | 0.83 | 0.81 | 0.76 | 0.72 | 0.68 | 0.63 | 0.60  | 0.48  | 0.41  |
| Namibia    | G1422     | 1              | 0.99 | 0.95 | 0.90 | 0.86 | 0.79 | 0.73 | 0.67 | 0.63 | 0.59 | 0.55 | 0.48 | 0.43 | 0.37 | 0.32 | 0.30  | 0.26  | 0.19  |
| Namibia    | G1427     | 1              | 0.94 | 0.85 | 0.77 | 0.69 | 0.65 | 0.59 | 0.55 | 0.51 | 0.47 | 0.44 | 0.38 | 0.32 | 0.28 | 0.27 | 0.25  | 0.22  | 0.15  |
| Namibia    | G1434     | 1              | 0.96 | 0.87 | 0.79 | 0.73 | 0.68 | 0.63 | 0.58 | 0.53 | 0.49 | 0.45 | 0.38 | 0.32 | 0.26 | 0.23 | 0.19  | 0.16  | 0.10  |
| Namibia    | G1441     | 1              | 0.93 | 0.80 | 0.72 | 0.66 | 0.62 | 0.58 | 0.52 | 0.49 | 0.45 | 0.40 | 0.33 | 0.29 | 0.26 | 0.22 | 0.23  | 0.17  | 0.17  |
| Namibia    | G1444     | 1              | 0.98 | 0.89 | 0.79 | 0.73 | 0.68 | 0.64 | 0.59 | 0.53 | 0.51 | 0.45 | 0.36 | 0.32 | 0.26 | 0.24 | 0.21  | 0.17  | 0.15  |
| Namibia    | G1453     | 1              | 0.97 | 0.90 | 0.80 | 0.74 | 0.68 | 0.62 | 0.58 | 0.52 | 0.50 | 0.45 | 0.34 | 0.31 | 0.24 | 0.23 | 0.18  | 0.14  | 0.12  |
| Namibia    | G1727     | 1              | 1.00 | 1.00 | 1.00 | 1.00 | 0.99 | 0.99 | 0.98 | 0.97 | 0.96 | 0.94 | 0.92 | 0.90 | 0.87 | 0.85 | 0.83  | 0.77  | 0.69  |
| Namibia    | G1790     | 1              | 1.00 | 1.00 | 1.00 | 0.99 | 0.99 | 0.99 | 0.98 | 0.98 | 0.97 | 0.97 | 0.96 | 0.94 | 0.93 | 0.91 | 0.90  | 0.87  | 0.83  |
| Namibia    | G1979     | 1              | 1.00 | 1.00 | 0.99 | 0.99 | 0.98 | 0.97 | 0.96 | 0.95 | 0.94 | 0.93 | 0.89 | 0.84 | 0.78 | 0.71 | 0.65  | 0.49  | 0.34  |
| Namibia    | G5731     | 1              | 1.00 | 1.00 | 0.99 | 0.99 | 0.98 | 0.97 | 0.96 | 0.95 | 0.93 | 0.92 | 0.89 | 0.87 | 0.84 | 0.82 | 0.80  | 0.74  | 0.67  |
| Namibia    | G5747     | 1              | 1.00 | 1.00 | 1.00 | 1.00 | 1.00 | 1.00 | 0.99 | 0.99 | 0.96 | 0.94 | 0.90 | 0.84 | 0.78 | 0.72 | 0.67  | 0.59  | 0.49  |
| Namibia    | G5753     | 1              | 1.00 | 1.00 | 1.00 | 0.99 | 0.98 | 0.98 | 0.97 | 0.96 | 0.94 | 0.92 | 0.89 | 0.85 | 0.81 | 0.78 | 0.74  | 0.67  | 0.62  |
| Namibia    | G5756     | 1              | 1.00 | 1.00 | 0.99 | 0.97 | 0.96 | 0.93 | 0.90 | 0.87 | 0.84 | 0.81 | 0.77 | 0.72 | 0.69 | 0.65 | 0.62  | 0.56  | 0.52  |
| Namibia    | G5757     | 1              | 1.00 | 1.00 | 0.99 | 0.98 | 0.97 | 0.94 | 0.92 | 0.90 | 0.87 | 0.84 | 0.79 | 0.75 | 0.71 | 0.66 | 0.63  | 0.56  | 0.50  |

| Country | GloFAS ID | Station filter | LT1  | LT2  | LT3  | LT4  | LT5  | LT6   | LT7   | LT8   | LT9   | LT10  | LT12   | LT14   | LT16  | LT18  | LT20  | LT25  | L30   |
|---------|-----------|----------------|------|------|------|------|------|-------|-------|-------|-------|-------|--------|--------|-------|-------|-------|-------|-------|
| Namibia | G5758     | 1              | 1.00 | 1.00 | 0.99 | 0.99 | 0.99 | 0.98  | 0.97  | 0.96  | 0.94  | 0.93  | 0.89   | 0.85   | 0.81  | 0.77  | 0.73  | 0.64  | 0.58  |
| Namibia | G5762     | 1              | 1.00 | 1.00 | 0.99 | 0.99 | 0.97 | 0.95  | 0.93  | 0.91  | 0.88  | 0.86  | 0.81   | 0.77   | 0.74  | 0.70  | 0.66  | 0.60  | 0.55  |
| Namibia | G5763     | 1              | 1.00 | 1.00 | 0.99 | 0.99 | 0.99 | 0.98  | 0.97  | 0.97  | 0.95  | 0.94  | 0.90   | 0.86   | 0.83  | 0.79  | 0.76  | 0.68  | 0.62  |
| Namibia | G5770     | 1              | 1.00 | 1.00 | 0.99 | 0.99 | 0.98 | 0.97  | 0.95  | 0.93  | 0.91  | 0.89  | 0.85   | 0.81   | 0.78  | 0.74  | 0.71  | 0.64  | 0.59  |
| Namibia | G5773     | 1              | 1.00 | 0.97 | 0.93 | 0.88 | 0.83 | 0.77  | 0.72  | 0.68  | 0.64  | 0.60  | 0.54   | 0.48   | 0.44  | 0.40  | 0.36  | 0.28  | 0.23  |
| Namibia | G5906     | 1              | 1.00 | 0.99 | 0.99 | 0.98 | 0.98 | 0.97  | 0.97  | 0.96  | 0.95  | 0.94  | 0.90   | 0.84   | 0.82  | 0.77  | 0.71  | 0.56  | 0.39  |
| Namibia | G5907     | 1              | 1.00 | 1.00 | 1.00 | 0.99 | 0.98 | 0.97  | 0.93  | 0.88  | 0.84  | 0.81  | 0.71   | 0.64   | 0.56  | 0.48  | 0.40  | 0.27  | 0.21  |
| Namibia | G5922     | 1              | 1.00 | 1.00 | 0.99 | 0.99 | 0.99 | 0.98  | 0.96  | 0.94  | 0.92  | 0.89  | 0.79   | 0.69   | 0.63  | 0.56  | 0.47  | 0.24  | 0.01  |
| Namibia | G5925     | 1              | 1.00 | 0.99 | 0.95 | 0.92 | 0.88 | 0.82  | 0.75  | 0.71  | 0.66  | 0.61  | 0.55   | 0.46   | 0.40  | 0.34  | 0.30  | 0.21  | 0.15  |
| Niger   | G0990     | 1              | 1.00 | 1.00 | 1.00 | 1.00 | 0.99 | 0.99  | 0.98  | 0.97  | 0.95  | 0.93  | 0.87   | 0.79   | 0.69  | 0.58  | 0.45  | -0.01 | -0.41 |
| Niger   | G0991     | 1              | 1.00 | 1.00 | 1.00 | 1.00 | 1.00 | 1.00  | 1.00  | 1.00  | 1.00  | 1.00  | 1.00   | 1.00   | 1.00  | 0.99  | 0.99  | 0.99  | 0.98  |
| Niger   | G1004     | 1              | 1.00 | 1.00 | 1.00 | 0.99 | 0.98 | 0.97  | 0.96  | 0.93  | 0.90  | 0.86  | 0.74   | 0.57   | 0.30  | -0.05 | -0.49 | -1.49 | -2.08 |
| Niger   | G1007     | 1              | 1.00 | 1.00 | 1.00 | 1.00 | 1.00 | 1.00  | 1.00  | 1.00  | 1.00  | 1.00  | 1.00   | 1.00   | 0.99  | 0.99  | 0.99  | 0.97  | 0.94  |
| Niger   | G1020     | 1              | 0.90 | 0.70 | 0.48 | 0.28 | 0.12 | -0.05 | -0.12 | -0.20 | -0.30 | -0.39 | -0.56  | -0.70  | -0.68 | -0.65 | -0.62 | -0.66 | -0.64 |
| Niger   | G1028     | 1              | 0.99 | 0.98 | 0.98 | 0.97 | 0.96 | 0.95  | 0.95  | 0.94  | 0.94  | 0.94  | 0.92   | 0.92   | 0.91  | 0.91  | 0.91  | 0.89  | 0.86  |
| Niger   | G1894     | 1              | 1.00 | 0.99 | 0.98 | 0.95 | 0.93 | 0.89  | 0.86  | 0.84  | 0.82  | 0.79  | 0.75   | 0.72   | 0.70  | 0.69  | 0.69  | 0.69  | 0.66  |
| Niger   | G4670     | 0              | -    | -    | -    | -    | -    | -     | -     | -     | -     | -     | -      | -      | -     | -     | -     | -     | -     |
| Niger   | G4671     | 0              | -    | -    | -    | -    | -    | -     | -     | -     | -     | -     | -      | -      | -     | -     | -     | -     | -     |
| Niger   | G4690     | 0              | -    | -    | -    | -    | -    | -     | -     | -     | -     | -     | -      | -      | -     | -     | -     | -     | -     |
| Niger   | G4699     | 1              | 0.99 | 0.97 | 0.96 | 0.93 | 0.90 | 0.88  | 0.85  | 0.81  | 0.78  | 0.75  | 0.67   | 0.61   | -0.08 | -0.57 | -7.07 | -7.73 | -4.25 |
| Niger   | G4700     | 0              | -    | -    | -    | -    | -    | -     | -     | -     | -     | -     | -      | -      | -     | -     | -     | -     | -     |
| Niger   | G4714     | 0              | -    | -    | -    | -    | -    | -     | -     | -     | -     | -     | -      | -      | -     | -     | -     | -     | -     |
| Niger   | G4718     | 1              | 0.98 | 0.95 | 0.93 | 0.90 | 0.86 | 0.81  | 0.77  | 0.76  | 0.77  | -0.38 | -65.89 | -46.40 | -     | -     | -     | -     | -     |
| Niger   | G4721     | 0              | -    | -    | -    | -    | -    | -     | -     | -     | -     | -     | -      | -      | -     | -     | -     | -     | -     |
| Niger   | G4722     | 0              | -    | -    | -    | -    | -    | -     | -     | -     | -     | -     | -      | -      | -     | -     | -     | -     | -     |
| Niger   | G4723     | 0              | -    | -    | -    | -    | -    | -     | -     | -     | -     | -     | -      | -      | -     | -     | -     | -     | -     |
| Niger   | G4744     | 0              | -    | -    | -    | -    | -    | -     | -     | -     | -     | -     | -      | -      | -     | -     | -     | -     | -     |
| Niger   | G4747     | 0              | -    | -    | -    | -    | -    | -     | -     | -     | -     | -     | -      | -      | -     | -     | -     | -     | -     |
| Niger   | G4753     | 0              | -    | -    | -    | -    | -    | -     | -     | -     | -     | -     | -      | -      | -     | -     | -     | -     | -     |
| Niger   | G4754     | 0              | -    | -    | -    | -    | -    | -     | -     | -     | -     | -     | -      | -      | -     | -     | -     | -     | -     |
| Niger   | G4755     | 1              | 1.00 | 1.00 | 0.98 | 0.97 | 0.96 | 0.97  | 0.97  | 0.97  | 0.96  | 0.70  | 0.28   | 0.50   | 0.54  | 0.54  | 0.43  | 0.08  | -0.11 |
| Niger   | G4756     | 1              | 1.00 | 0.99 | 0.97 | 0.93 | 0.85 | 0.80  | 0.78  | 0.76  | 0.70  | 0.63  | 0.57   | 0.52   | 0.50  | 0.47  | 0.44  | 0.33  | 0.33  |
| Niger   | G4768     | 1              | 1.00 | 1.00 | 0.98 | 0.95 | 0.89 | 0.82  | 0.80  | 0.78  | 0.74  | 0.66  | 0.59   | 0.54   | 0.52  | 0.49  | 0.44  | 0.33  | 0.32  |
| Niger   | G4778     | 0              | -    | -    | -    | -    | -    | -     | -     | -     | -     | -     | -      | -      | -     | -     | -     | -     | -     |
| Niger   | G4779     | 0              | -    | -    | -    | -    | -    | -     | -     | -     | -     | -     | -      | -      | -     | -     | -     | -     | -     |
| Niger   | G4780     | 1              | 1.00 | 1.00 | 1.00 | 0.70 | 0.67 | 0.79  | 0.85  | 0.86  | 0.84  | 0.84  | 0.44   | 0.43   | -1.86 | -0.77 | -0.10 | -0.16 | -0.11 |
| Niger   | G4783     | 1              | 1.00 | 1.00 | 1.00 | 0.99 | 0.96 | 0.92  | 0.86  | 0.82  | 0.76  | 0.66  | 0.60   | 0.52   | 0.43  | 0.37  | 0.34  | 0.16  | 0.05  |
| Niger   | G4784     | 1              | 1.00 | 1.00 | 1.00 | 0.98 | 0.95 | 0.91  | 0.84  | 0.81  | 0.73  | 0.64  | 0.59   | 0.50   | 0.43  | 0.37  | 0.33  | 0.15  | 0.07  |
| Niger   | G4785     | 1              | 1.00 | 1.00 | 0.99 | 0.97 | 0.92 | 0.87  | 0.84  | 0.82  | 0.72  | 0.65  | 0.60   | 0.52   | 0.44  | 0.41  | 0.36  | 0.22  | 0.14  |

| Country | GloFAS ID | Station filter | LT1  | LT2  | LT3  | LT4    | LT5    | LT6    | LT7    | LT8    | LT9    | LT10   | LT12   | LT14   | LT16   | LT18   | LT20   | LT25   | L30    |
|---------|-----------|----------------|------|------|------|--------|--------|--------|--------|--------|--------|--------|--------|--------|--------|--------|--------|--------|--------|
| Niger   | G4786     | 1              | 1.00 | 1.00 | 0.98 | 0.94   | 0.87   | 0.80   | 0.78   | 0.77   | 0.73   | 0.66   | 0.57   | 0.52   | 0.51   | 0.48   | 0.44   | 0.34   | 0.30   |
| Niger   | G4792     | 1              | 0.99 | 0.96 | 0.45 | -12.84 | -47.16 | -66.42 | -83.04 | -75.66 | -63.81 | -54.00 | -49.16 | -44.39 | -48.82 | -96.88 | -95.48 | -62.21 | -59.94 |
| Niger   | G4793     | 1              | 1.00 | 1.00 | 1.00 | 1.00   | 0.98   | 0.96   | 0.93   | 0.87   | 0.83   | 0.75   | 0.63   | 0.58   | 0.48   | 0.39   | 0.34   | 0.15   | 0.03   |
| Niger   | G4794     | 1              | 1.00 | 1.00 | 1.00 | 1.00   | 0.99   | 0.96   | 0.93   | 0.89   | 0.74   | 0.70   | 0.65   | 0.57   | 0.45   | 0.39   | 0.30   | 0.12   | -0.01  |
| Niger   | G4809     | 0              | -    | -    | -    | -      | -      | -      | -      | -      | -      | -      | -      | -      | -      | -      | -      | -      | -      |
| Niger   | G4810     | 1              | 1.00 | 1.00 | 1.00 | 1.00   | 0.99   | 0.97   | 0.94   | 0.91   | 0.89   | 0.83   | 0.71   | 0.64   | 0.56   | 0.49   | 0.41   | 0.15   | 0.06   |
| Niger   | G4817     | 1              | 1.00 | 1.00 | 1.00 | 1.00   | 0.99   | 0.97   | 0.93   | 0.88   | 0.86   | 0.82   | 0.70   | 0.64   | 0.54   | 0.48   | 0.41   | 0.15   | 0.06   |
| Niger   | G4862     | 1              | 1.00 | 1.00 | 0.99 | 0.99   | 0.99   | 0.98   | 0.98   | 0.97   | 0.97   | 0.96   | 0.85   | 0.82   | 0.80   | 0.75   | 0.69   | 0.52   | 0.40   |
| Niger   | G4865     | 1              | 1.00 | 1.00 | 1.00 | 1.00   | 1.00   | 1.00   | 1.00   | 1.00   | 0.99   | 0.94   | 0.81   | 0.68   | 0.64   | 0.57   | 0.55   | 0.47   | 0.41   |
| Niger   | G4876     | 1              | 1.00 | 0.99 | 0.97 | 0.97   | 0.92   | 0.82   | 0.81   | 0.79   | 0.77   | 0.71   | 0.60   | 0.41   | 0.31   | 0.29   | 0.21   | 0.00   | -0.16  |
| Niger   | G4877     | 1              | 0.99 | 0.91 | 0.91 | 0.89   | 0.79   | 0.59   | 0.60   | 0.60   | 0.55   | 0.46   | 0.34   | 0.19   | 0.02   | -0.14  | -0.34  | -0.61  | -0.91  |
| Niger   | G4891     | 1              | 0.84 | 0.63 | 0.15 | -0.30  | -0.49  | -0.43  | -0.55  | -1.17  | -1.69  | -1.96  | -3.13  | -3.33  | -4.06  | -2.92  | -3.02  | -2.54  | -2.86  |
| Niger   | G4893     | 1              | 1.00 | 0.99 | 0.99 | 0.99   | 0.98   | 0.97   | 0.97   | 0.95   | 0.93   | 0.88   | 0.76   | 0.68   | 0.58   | 0.48   | 0.42   | 0.30   | 0.17   |
| Niger   | G4898     | 1              | 1.00 | 1.00 | 0.99 | 0.96   | 0.93   | 0.89   | 0.85   | 0.79   | 0.70   | 0.63   | 0.49   | 0.31   | 0.14   | 0.04   | 0.00   | 0.04   | -0.01  |
| Niger   | G4901     | 1              | 0.99 | 0.93 | 0.88 | 0.85   | 0.76   | 0.55   | 0.43   | -0.12  | -0.30  | -0.33  | -1.27  | -3.16  | -4.66  | -5.58  | -5.97  | -6.21  | -6.81  |
| Niger   | G4902     | 1              | 0.99 | 0.91 | 0.87 | 0.87   | 0.83   | 0.63   | 0.47   | 0.47   | 0.41   | 0.31   | 0.16   | -0.14  | -0.30  | -0.32  | -0.36  | -0.49  | -0.56  |
| Niger   | G4903     | 1              | 1.00 | 0.99 | 0.96 | 0.90   | 0.81   | 0.72   | 0.61   | 0.52   | 0.44   | 0.33   | 0.06   | -0.29  | -0.48  | -0.61  | -0.81  | -1.15  | -1.39  |
| Niger   | G4904     | 1              | 1.00 | 1.00 | 0.99 | 0.98   | 0.91   | 0.86   | 0.84   | 0.78   | 0.73   | 0.71   | 0.63   | 0.53   | 0.43   | 0.37   | 0.27   | 0.14   | 0.00   |
| Niger   | G4912     | 1              | 1.00 | 0.99 | 0.99 | 0.97   | 0.94   | 0.91   | 0.87   | 0.82   | 0.76   | 0.69   | 0.46   | 0.16   | -0.23  | -0.68  | -1.06  | -1.76  | -2.05  |
| Niger   | G4918     | 1              | 1.00 | 1.00 | 1.00 | 1.00   | 1.00   | 1.00   | 1.00   | 1.00   | 1.00   | 1.00   | 0.99   | 0.99   | 0.99   | 0.99   | 0.98   | 0.96   | 0.94   |
| Niger   | G4921     | 1              | 1.00 | 1.00 | 1.00 | 1.00   | 0.99   | 0.99   | 0.99   | 0.98   | 0.98   | 0.97   | 0.95   | 0.93   | 0.91   | 0.86   | 0.81   | 0.60   | 0.45   |
| Niger   | G4934     | 1              | 1.00 | 1.00 | 0.98 | 0.92   | 0.87   | 0.84   | 0.78   | 0.64   | 0.49   | 0.41   | 0.21   | -0.07  | -0.50  | -0.75  | -0.83  | -0.98  | -1.16  |
| Nigeria | G1019     | 1              | 1.00 | 1.00 | 0.99 | 0.99   | 0.98   | 0.96   | 0.95   | 0.93   | 0.89   | 0.85   | 0.77   | 0.64   | 0.51   | 0.30   | 0.12   | -0.20  | -0.39  |
| Nigeria | G1024     | 1              | 1.00 | 1.00 | 1.00 | 1.00   | 1.00   | 0.99   | 0.99   | 0.99   | 0.99   | 0.99   | 0.98   | 0.97   | 0.95   | 0.93   | 0.90   | 0.82   | 0.73   |
| Nigeria | G1026     | 1              | 1.00 | 0.99 | 0.99 | 0.97   | 0.91   | 0.87   | 0.85   | 0.80   | 0.74   | 0.69   | 0.58   | 0.45   | 0.31   | 0.19   | 0.10   | -0.04  | -0.14  |
| Nigeria | G1027     | 1              | 1.00 | 1.00 | 0.99 | 0.99   | 0.99   | 0.99   | 0.99   | 0.98   | 0.98   | 0.98   | 0.96   | 0.94   | 0.91   | 0.87   | 0.80   | 0.59   | 0.42   |
| Nigeria | G1031     | 1              | 1.00 | 1.00 | 0.99 | 0.98   | 0.97   | 0.95   | 0.92   | 0.88   | 0.82   | 0.75   | 0.64   | 0.51   | 0.40   | 0.32   | 0.30   | 0.31   | 0.35   |
| Nigeria | G1032     | 1              | 1.00 | 1.00 | 0.99 | 0.99   | 0.99   | 0.99   | 0.98   | 0.98   | 0.97   | 0.97   | 0.94   | 0.90   | 0.84   | 0.76   | 0.67   | 0.43   | 0.33   |
| Nigeria | G1035     | 1              | 0.99 | 0.98 | 0.98 | 0.97   | 0.95   | 0.93   | 0.90   | 0.86   | 0.82   | 0.78   | 0.69   | 0.62   | 0.56   | 0.53   | 0.49   | 0.43   | 0.39   |
| Nigeria | G1036     | 1              | 1.00 | 0.99 | 0.99 | 0.99   | 0.99   | 0.98   | 0.98   | 0.97   | 0.97   | 0.96   | 0.92   | 0.87   | 0.80   | 0.72   | 0.61   | 0.39   | 0.31   |
| Nigeria | G1043     | 1              | 1.00 | 1.00 | 0.98 | 0.94   | 0.88   | 0.81   | 0.73   | 0.66   | 0.59   | 0.53   | 0.38   | 0.24   | 0.13   | 0.08   | 0.09   | 0.12   | 0.10   |
| Nigeria | G1051     | 1              | 1.00 | 0.99 | 0.98 | 0.96   | 0.93   | 0.89   | 0.84   | 0.80   | 0.77   | 0.73   | 0.67   | 0.60   | 0.54   | 0.51   | 0.50   | 0.49   | 0.47   |
| Nigeria | G1077     | 1              | 0.98 | 0.87 | 0.71 | 0.59   | 0.49   | 0.40   | 0.32   | 0.26   | 0.19   | 0.14   | 0.08   | 0.00   | -0.05  | -0.06  | -0.06  | -0.09  | -0.14  |
| Nigeria | G1083     | 1              | 0.99 | 0.97 | 0.93 | 0.87   | 0.81   | 0.76   | 0.71   | 0.67   | 0.63   | 0.60   | 0.55   | 0.51   | 0.47   | 0.44   | 0.42   | 0.37   | 0.32   |
| Nigeria | G1895     | 1              | 1.00 | 0.99 | 0.98 | 0.96   | 0.94   | 0.90   | 0.87   | 0.84   | 0.82   | 0.79   | 0.75   | 0.71   | 0.68   | 0.67   | 0.67   | 0.66   | 0.64   |
| Nigeria | G1896     | 1              | 1.00 | 0.99 | 0.98 | 0.96   | 0.93   | 0.89   | 0.85   | 0.81   | 0.77   | 0.74   | 0.67   | 0.61   | 0.55   | 0.51   | 0.50   | 0.49   | 0.47   |
| Nigeria | G1897     | 1              | 0.99 | 0.99 | 0.97 | 0.95   | 0.93   | 0.91   | 0.89   | 0.87   | 0.85   | 0.84   | 0.81   | 0.78   | 0.75   | 0.73   | 0.71   | 0.67   | 0.63   |
| Nigeria | G1898     | 1              | 1.00 | 0.99 | 0.97 | 0.94   | 0.90   | 0.85   | 0.80   | 0.75   | 0.71   | 0.67   | 0.60   | 0.56   | 0.51   | 0.47   | 0.44   | 0.38   | 0.33   |
| Nigeria | G1899     | 1              | 0.97 | 0.92 | 0.86 | 0.81   | 0.76   | 0.72   | 0.68   | 0.64   | 0.60   | 0.58   | 0.52   | 0.47   | 0.41   | 0.35   | 0.31   | 0.20   | 0.12   |

| Country             | GloFAS ID | Station filter | LT1  | LT2  | LT3  | LT4  | LT5  | LT6  | LT7  | LT8   | LT9   | LT10  | LT12  | LT14  | LT16  | LT18  | LT20  | LT25  | L30   |
|---------------------|-----------|----------------|------|------|------|------|------|------|------|-------|-------|-------|-------|-------|-------|-------|-------|-------|-------|
| Nigeria             | G1900     | 1              | 0.99 | 0.91 | 0.78 | 0.66 | 0.57 | 0.49 | 0.42 | 0.37  | 0.31  | 0.26  | 0.19  | 0.13  | 0.08  | 0.07  | 0.09  | 0.04  | -0.01 |
| Nigeria             | G4905     | 1              | 0.99 | 0.91 | 0.84 | 0.77 | 0.65 | 0.47 | 0.13 | -0.25 | -0.78 | -1.12 | -2.28 | -3.29 | -4.58 | -5.78 | -6.72 | -7.77 | -8.17 |
| Nigeria             | G4906     | 1              | 1.00 | 1.00 | 1.00 | 1.00 | 1.00 | 1.00 | 1.00 | 0.99  | 0.99  | 0.99  | 0.99  | 0.98  | 0.97  | 0.95  | 0.92  | 0.79  | 0.59  |
| Nigeria             | G4908     | 1              | 1.00 | 0.99 | 0.98 | 0.96 | 0.94 | 0.90 | 0.84 | 0.76  | 0.65  | 0.54  | 0.28  | -0.05 | -0.43 | -0.95 | -1.47 | -2.19 | -2.68 |
| Nigeria             | G4909     | 1              | 1.00 | 0.99 | 0.98 | 0.97 | 0.96 | 0.95 | 0.93 | 0.90  | 0.86  | 0.82  | 0.69  | 0.53  | 0.31  | 0.01  | -0.33 | -0.84 | -1.25 |
| Nigeria             | G4913     | 1              | 1.00 | 0.99 | 0.99 | 0.98 | 0.97 | 0.94 | 0.88 | 0.82  | 0.73  | 0.62  | 0.30  | -0.12 | -0.65 | -1.12 | -1.39 | -1.52 | -1.42 |
| Nigeria             | G4917     | 1              | 0.99 | 0.94 | 0.88 | 0.81 | 0.78 | 0.75 | 0.70 | 0.65  | 0.57  | 0.45  | 0.07  | -0.32 | -0.76 | -1.22 | -1.63 | -2.03 | -2.00 |
| Nigeria             | G4919     | 1              | 0.99 | 0.94 | 0.82 | 0.66 | 0.55 | 0.42 | 0.29 | 0.20  | 0.13  | 0.05  | -0.23 | -0.46 | -0.54 | -0.48 | -0.51 | -0.54 | -0.58 |
| Nigeria             | G4920     | 1              | 1.00 | 1.00 | 0.99 | 0.99 | 0.98 | 0.98 | 0.97 | 0.94  | 0.89  | 0.87  | 0.74  | 0.66  | 0.49  | 0.33  | 0.17  | -0.06 | -0.27 |
| Nigeria             | G4922     | 1              | 1.00 | 1.00 | 0.99 | 0.99 | 0.98 | 0.97 | 0.96 | 0.94  | 0.91  | 0.87  | 0.76  | 0.64  | 0.50  | 0.39  | 0.31  | 0.27  | 0.29  |
| Nigeria             | G4924     | 1              | 1.00 | 1.00 | 0.97 | 0.90 | 0.85 | 0.82 | 0.75 | 0.68  | 0.64  | 0.61  | 0.48  | 0.38  | 0.29  | 0.23  | 0.18  | 0.08  | -0.04 |
| Nigeria             | G4927     | 1              | 1.00 | 0.99 | 0.99 | 0.99 | 0.99 | 0.99 | 0.98 | 0.98  | 0.98  | 0.98  | 0.97  | 0.96  | 0.94  | 0.91  | 0.86  | 0.70  | 0.53  |
| Nigeria             | G4932     | 1              | 1.00 | 0.99 | 0.99 | 0.98 | 0.97 | 0.97 | 0.95 | 0.94  | 0.92  | 0.89  | 0.83  | 0.77  | 0.71  | 0.66  | 0.63  | 0.57  | 0.51  |
| Nigeria             | G4933     | 1              | 1.00 | 1.00 | 0.99 | 0.98 | 0.96 | 0.92 | 0.88 | 0.84  | 0.78  | 0.71  | 0.55  | 0.36  | 0.16  | -0.03 | -0.22 | -0.58 | -0.79 |
| Nigeria             | G4935     | 1              | 0.99 | 0.97 | 0.92 | 0.76 | 0.54 | 0.39 | 0.27 | 0.11  | -0.04 | -0.22 | -0.47 | -0.69 | -0.90 | -0.93 | -0.81 | -0.75 | -0.59 |
| Nigeria             | G4938     | 1              | 0.99 | 0.97 | 0.92 | 0.84 | 0.72 | 0.59 | 0.46 | 0.36  | 0.26  | 0.15  | -0.12 | -0.55 | -0.90 | -1.11 | -1.22 | -1.53 | -1.52 |
| Nigeria             | G4939     | 1              | 0.99 | 0.96 | 0.89 | 0.76 | 0.57 | 0.42 | 0.25 | 0.13  | 0.03  | -0.08 | -0.32 | -0.59 | -0.67 | -0.69 | -0.70 | -0.63 | -0.61 |
| Nigeria             | G4978     | 1              | 0.98 | 0.93 | 0.88 | 0.83 | 0.78 | 0.72 | 0.65 | 0.59  | 0.55  | 0.51  | 0.45  | 0.40  | 0.34  | 0.33  | 0.32  | 0.27  | 0.24  |
| Nigeria             | G4989     | 1              | 0.97 | 0.86 | 0.73 | 0.60 | 0.52 | 0.48 | 0.45 | 0.39  | 0.35  | 0.31  | 0.23  | 0.21  | 0.20  | 0.19  | 0.20  | 0.16  | 0.15  |
| Nigeria             | G4990     | 1              | 0.97 | 0.90 | 0.81 | 0.76 | 0.74 | 0.71 | 0.66 | 0.64  | 0.62  | 0.59  | 0.54  | 0.49  | 0.47  | 0.42  | 0.42  | 0.34  | 0.31  |
| Nigeria             | G4993     | 1              | 0.98 | 0.93 | 0.87 | 0.79 | 0.74 | 0.70 | 0.64 | 0.58  | 0.53  | 0.51  | 0.43  | 0.40  | 0.33  | 0.33  | 0.32  | 0.30  | 0.26  |
| Nigeria             | G4994     | 1              | 0.98 | 0.89 | 0.75 | 0.62 | 0.54 | 0.47 | 0.41 | 0.36  | 0.32  | 0.29  | 0.22  | 0.15  | 0.10  | 0.07  | 0.08  | 0.03  | 0.02  |
| Nigeria             | G5024     | 1              | 0.99 | 0.97 | 0.96 | 0.93 | 0.91 | 0.89 | 0.87 | 0.84  | 0.82  | 0.81  | 0.78  | 0.75  | 0.73  | 0.71  | 0.69  | 0.65  | 0.62  |
| Nigeria             | G5025     | 1              | 0.99 | 0.93 | 0.84 | 0.74 | 0.68 | 0.64 | 0.60 | 0.56  | 0.53  | 0.49  | 0.42  | 0.38  | 0.36  | 0.32  | 0.32  | 0.26  | 0.23  |
| Nigeria             | G5026     | 1              | 0.95 | 0.85 | 0.68 | 0.55 | 0.50 | 0.45 | 0.42 | 0.37  | 0.37  | 0.34  | 0.31  | 0.27  | 0.24  | 0.24  | 0.26  | 0.23  | 0.22  |
| Nigeria             | G5027     | 1              | 0.99 | 0.96 | 0.91 | 0.82 | 0.72 | 0.64 | 0.56 | 0.49  | 0.43  | 0.39  | 0.32  | 0.25  | 0.19  | 0.15  | 0.12  | 0.11  | 0.06  |
| Nigeria             | G5030     | 1              | 0.99 | 0.97 | 0.94 | 0.91 | 0.88 | 0.85 | 0.83 | 0.80  | 0.77  | 0.75  | 0.71  | 0.68  | 0.65  | 0.64  | 0.62  | 0.57  | 0.54  |
| Nigeria             | G5033     | 1              | 0.99 | 0.95 | 0.90 | 0.83 | 0.75 | 0.66 | 0.60 | 0.52  | 0.46  | 0.42  | 0.35  | 0.27  | 0.21  | 0.16  | 0.12  | 0.11  | 0.05  |
| Nigeria             | G5039     | 1              | 0.92 | 0.68 | 0.48 | 0.35 | 0.25 | 0.17 | 0.10 | 0.04  | -0.01 | -0.05 | -0.11 | -0.18 | -0.23 | -0.11 | -0.08 | -0.16 | -0.23 |
| Nigeria             | G5045     | 1              | 0.98 | 0.89 | 0.78 | 0.69 | 0.60 | 0.52 | 0.45 | 0.39  | 0.32  | 0.28  | 0.21  | 0.13  | 0.08  | 0.06  | 0.04  | 0.02  | -0.03 |
| Nigeria             | G5048     | 1              | 0.99 | 0.97 | 0.94 | 0.90 | 0.86 | 0.83 | 0.80 | 0.77  | 0.74  | 0.71  | 0.67  | 0.64  | 0.62  | 0.60  | 0.58  | 0.55  | 0.51  |
| Nigeria             | G5049     | 1              | 0.96 | 0.85 | 0.72 | 0.62 | 0.57 | 0.53 | 0.49 | 0.46  | 0.43  | 0.42  | 0.36  | 0.33  | 0.31  | 0.29  | 0.28  | 0.22  | 0.17  |
| Nigeria             | G5050     | 1              | 0.94 | 0.70 | 0.48 | 0.32 | 0.20 | 0.09 | 0.01 | -0.05 | -0.12 | -0.17 | -0.24 | -0.29 | -0.36 | -0.31 | -0.29 | -0.40 | -0.47 |
| Nigeria             | G5094     | 1              | 1.00 | 0.99 | 0.97 | 0.92 | 0.86 | 0.78 | 0.71 | 0.64  | 0.57  | 0.50  | 0.39  | 0.29  | 0.22  | 0.16  | 0.13  | 0.07  | 0.04  |
| Nigeria             | G5097     | 1              | 1.00 | 0.98 | 0.93 | 0.86 | 0.79 | 0.72 | 0.66 | 0.60  | 0.55  | 0.50  | 0.41  | 0.33  | 0.25  | 0.19  | 0.12  | -0.03 | -0.13 |
| Nigeria             | G5105     | 1              | 0.98 | 0.92 | 0.84 | 0.74 | 0.66 | 0.60 | 0.54 | 0.48  | 0.43  | 0.38  | 0.31  | 0.24  | 0.18  | 0.13  | 0.10  | 0.01  | -0.06 |
| Nigeria             | G5112     | 1              | 0.97 | 0.83 | 0.65 | 0.51 | 0.43 | 0.36 | 0.31 | 0.26  | 0.22  | 0.19  | 0.15  | 0.11  | 0.07  | 0.04  | 0.01  | -0.05 | -0.10 |
| Republic of Liberia | G4931     | 1              | 0.95 | 0.87 | 0.76 | 0.63 | 0.52 | 0.44 | 0.36 | 0.28  | 0.22  | 0.16  | 0.05  | -0.02 | -0.10 | -0.15 | -0.19 | -0.29 | -0.39 |
| Republic of Liberia | G4947     | 1              | 0.92 | 0.77 | 0.63 | 0.52 | 0.44 | 0.37 | 0.31 | 0.25  | 0.21  | 0.16  | 0.09  | 0.05  | 0.01  | -0.02 | -0.05 | -0.14 | -0.17 |

| Country             | GloFAS ID | Station filter | LT1  | LT2  | LT3   | LT4   | LT5   | LT6   | LT7   | LT8   | LT9   | LT10  | LT12  | LT14  | LT16  | LT18  | LT20  | LT25  | L30   |
|---------------------|-----------|----------------|------|------|-------|-------|-------|-------|-------|-------|-------|-------|-------|-------|-------|-------|-------|-------|-------|
| Republic of Liberia | G4948     | 0              | 0.89 | 0.77 | 0.69  | 0.60  | 0.52  | 0.47  | 0.43  | 0.38  | 0.34  | 0.32  | 0.27  | 0.24  | 0.20  | 0.18  | 0.15  | 0.08  | 0.02  |
| Republic of Liberia | G4952     | 1              | 0.90 | 0.78 | 0.66  | 0.54  | 0.43  | 0.34  | 0.27  | 0.19  | 0.14  | 0.09  | -0.01 | -0.08 | -0.13 | -0.17 | -0.21 | -0.31 | -0.42 |
| Republic of Liberia | G5087     | 1              | 0.95 | 0.82 | 0.68  | 0.56  | 0.48  | 0.41  | 0.35  | 0.28  | 0.25  | 0.21  | 0.13  | 0.09  | 0.04  | 0.03  | -0.01 | -0.09 | -0.15 |
| Republic of Liberia | G5108     | 1              | 0.96 | 0.87 | 0.74  | 0.62  | 0.53  | 0.46  | 0.39  | 0.33  | 0.28  | 0.25  | 0.16  | 0.10  | 0.04  | 0.01  | -0.03 | -0.11 | -0.21 |
| Republic of Liberia | G5111     | 1              | 0.88 | 0.70 | 0.58  | 0.47  | 0.39  | 0.33  | 0.27  | 0.21  | 0.18  | 0.14  | 0.06  | 0.01  | -0.04 | -0.06 | -0.08 | -0.18 | -0.22 |
| Rwanda              | G5342     | 1              | 1.00 | 0.99 | 0.98  | 0.95  | 0.89  | 0.80  | 0.69  | 0.58  | 0.47  | 0.37  | 0.22  | 0.11  | 0.03  | -0.04 | -0.09 | -0.08 | -0.02 |
| Senegal             | G0996     | 1              | 0.99 | 0.94 | 0.88  | 0.79  | 0.68  | 0.58  | 0.50  | 0.44  | 0.38  | 0.33  | 0.28  | 0.21  | 0.15  | 0.14  | 0.14  | 0.14  | 0.12  |
| Senegal             | G1008     | 1              | 1.00 | 0.98 | 0.94  | 0.88  | 0.78  | 0.68  | 0.59  | 0.52  | 0.45  | 0.39  | 0.32  | 0.25  | 0.18  | 0.13  | 0.13  | 0.08  | 0.07  |
| Senegal             | G1012     | 1              | 0.99 | 0.94 | 0.85  | 0.74  | 0.64  | 0.54  | 0.45  | 0.40  | 0.35  | 0.32  | 0.26  | 0.20  | 0.17  | 0.15  | 0.14  | 0.10  | 0.07  |
| Senegal             | G1013     | 1              | 0.99 | 0.96 | 0.88  | 0.75  | 0.66  | 0.58  | 0.48  | 0.40  | 0.34  | 0.30  | 0.26  | 0.18  | 0.13  | 0.11  | 0.11  | 0.07  | 0.05  |
| Senegal             | G1018     | 1              | 0.99 | 0.92 | 0.82  | 0.71  | 0.61  | 0.50  | 0.42  | 0.37  | 0.33  | 0.30  | 0.24  | 0.19  | 0.16  | 0.15  | 0.13  | 0.10  | 0.07  |
| Senegal             | G1022     | 1              | 0.98 | 0.89 | 0.75  | 0.63  | 0.51  | 0.43  | 0.37  | 0.34  | 0.30  | 0.26  | 0.21  | 0.17  | 0.15  | 0.13  | 0.09  | 0.06  | 0.01  |
| Senegal             | G4849     | 1              | 1.00 | 0.99 | 0.99  | 0.98  | 0.98  | 0.97  | 0.96  | 0.92  | 0.86  | 0.80  | 0.69  | 0.56  | 0.42  | 0.29  | 0.17  | 0.02  | 0.04  |
| Senegal             | G4856     | 1              | 1.00 | 0.99 | 0.98  | 0.94  | 0.87  | 0.86  | 0.77  | 0.66  | 0.63  | 0.59  | 0.43  | 0.39  | 0.29  | 0.22  | 0.17  | 0.13  | 0.13  |
| Senegal             | G4863     | 1              | 1.00 | 1.00 | 0.99  | 0.98  | 0.95  | 0.90  | 0.82  | 0.75  | 0.69  | 0.63  | 0.49  | 0.37  | 0.25  | 0.13  | 0.06  | 0.06  | 0.08  |
| Somalia             | G1604     | 1              | 1.00 | 0.97 | 0.85  | 0.65  | 0.41  | 0.19  | -0.02 | -0.19 | -0.33 | -0.44 | -0.59 | -0.71 | -0.77 | -0.83 | -0.86 | -0.77 | -0.78 |
| Somalia             | G1605     | 1              | 1.00 | 1.00 | 0.99  | 0.95  | 0.86  | 0.72  | 0.55  | 0.37  | 0.19  | 0.03  | -0.24 | -0.44 | -0.57 | -0.67 | -0.74 | -0.81 | -0.76 |
| Somalia             | G1606     | 1              | 0.70 | 0.14 | -0.11 | -0.22 | -0.30 | -0.36 | -0.37 | -0.37 | -0.41 | -0.44 | -0.49 | -0.54 | -0.56 | -0.44 | -0.39 | -0.38 | -0.41 |
| Somalia             | G1607     | 1              | 0.99 | 0.86 | 0.54  | 0.21  | -0.02 | -0.19 | -0.29 | -0.37 | -0.40 | -0.43 | -0.49 | -0.54 | -0.60 | -0.62 | -0.55 | -0.44 | -0.47 |
| Somalia             | G1903     | 1              | 1.00 | 0.99 | 0.88  | 0.64  | 0.37  | 0.13  | -0.06 | -0.20 | -0.30 | -0.36 | -0.44 | -0.51 | -0.57 | -0.61 | -0.64 | -0.48 | -0.48 |
| Somalia             | G1908     | 1              | 1.00 | 0.98 | 0.83  | 0.56  | 0.28  | 0.04  | -0.13 | -0.25 | -0.34 | -0.39 | -0.46 | -0.52 | -0.59 | -0.63 | -0.63 | -0.47 | -0.48 |
| Somalia             | G5084     | 1              | 1.00 | 0.95 | 0.91  | 0.84  | 0.78  | 0.74  | 0.74  | 0.70  | 0.63  | 0.62  | 0.58  | 0.55  | 0.46  | 0.48  | 0.44  | 0.41  | 0.34  |
| Somalia             | G5099     | 1              | 1.00 | 0.98 | 0.92  | 0.82  | 0.75  | 0.67  | 0.63  | 0.55  | 0.53  | 0.52  | 0.45  | 0.42  | 0.36  | 0.35  | 0.33  | 0.29  | 0.26  |
| Somalia             | G5101     | 1              | 1.00 | 0.99 | 0.97  | 0.92  | 0.88  | 0.82  | 0.78  | 0.75  | 0.73  | 0.69  | 0.62  | 0.58  | 0.53  | 0.47  | 0.44  | 0.39  | 0.37  |
| Somalia             | G5102     | 1              | 1.00 | 0.99 | 0.94  | 0.92  | 0.90  | 0.87  | 0.81  | 0.76  | 0.74  | 0.70  | 0.63  | 0.55  | 0.52  | 0.47  | 0.45  | 0.35  | 0.32  |
| Somalia             | G5107     | 1              | 1.00 | 0.99 | 0.95  | 0.91  | 0.87  | 0.84  | 0.78  | 0.71  | 0.65  | 0.61  | 0.52  | 0.46  | 0.37  | 0.33  | 0.32  | 0.32  | 0.32  |
| Somalia             | G5116     | 1              | 1.00 | 0.99 | 0.99  | 0.97  | 0.95  | 0.91  | 0.87  | 0.83  | 0.81  | 0.76  | 0.68  | 0.61  | 0.56  | 0.52  | 0.46  | 0.40  | 0.38  |
| Somalia             | G5119     | 1              | 1.00 | 0.99 | 0.96  | 0.92  | 0.90  | 0.86  | 0.78  | 0.77  | 0.76  | 0.73  | 0.64  | 0.58  | 0.56  | 0.48  | 0.48  | 0.37  | 0.37  |
| Somalia             | G5152     | 1              | 0.99 | 0.97 | 0.90  | 0.76  | 0.62  | 0.50  | 0.39  | 0.30  | 0.23  | 0.17  | 0.07  | 0.02  | -0.02 | -0.07 | -0.10 | -0.07 | -0.09 |
| Somalia             | G5190     | 1              | 0.98 | 0.93 | 0.88  | 0.88  | 0.87  | 0.80  | 0.73  | 0.71  | 0.67  | 0.61  | 0.59  | 0.50  | 0.46  | 0.42  | 0.41  | 0.32  | 0.27  |
| Somalia             | G5191     | 1              | 0.99 | 0.93 | 0.85  | 0.83  | 0.77  | 0.68  | 0.65  | 0.64  | 0.59  | 0.54  | 0.52  | 0.43  | 0.39  | 0.38  | 0.35  | 0.34  | 0.30  |
| Somalia             | G5201     | 1              | 1.00 | 0.99 | 0.97  | 0.91  | 0.87  | 0.84  | 0.80  | 0.76  | 0.74  | 0.71  | 0.63  | 0.58  | 0.53  | 0.48  | 0.44  | 0.34  | 0.29  |
| Somalia             | G5202     | 1              | 1.00 | 0.99 | 0.98  | 0.96  | 0.86  | 0.70  | 0.50  | 0.30  | 0.11  | -0.04 | -0.25 | -0.37 | -0.46 | -0.54 | -0.59 | -0.61 | -0.51 |
| Somalia             | G5212     | 1              | 1.00 | 1.00 | 0.99  | 0.97  | 0.92  | 0.88  | 0.86  | 0.81  | 0.74  | 0.70  | 0.64  | 0.61  | 0.55  | 0.51  | 0.45  | 0.43  | 0.38  |
| Somalia             | G5213     | 1              | 1.00 | 0.98 | 0.94  | 0.89  | 0.86  | 0.85  | 0.80  | 0.75  | 0.71  | 0.68  | 0.61  | 0.56  | 0.49  | 0.45  | 0.43  | 0.36  | 0.31  |
| Somalia             | G5218     | 1              | 1.00 | 0.99 | 0.98  | 0.97  | 0.95  | 0.90  | 0.88  | 0.84  | 0.79  | 0.74  | 0.67  | 0.62  | 0.57  | 0.51  | 0.46  | 0.42  | 0.39  |
| Somalia             | G5221     | 1              | 1.00 | 1.00 | 1.00  | 0.99  | 0.99  | 0.98  | 0.94  | 0.92  | 0.89  | 0.85  | 0.76  | 0.69  | 0.63  | 0.56  | 0.52  | 0.45  | 0.42  |
| Somalia             | G5222     | 1              | 1.00 | 0.98 | 0.95  | 0.92  | 0.88  | 0.87  | 0.83  | 0.79  | 0.75  | 0.70  | 0.64  | 0.58  | 0.53  | 0.47  | 0.45  | 0.38  | 0.34  |
| Somalia             | G5224     | 1              | 0.99 | 0.98 | 0.98  | 0.97  | 0.94  | 0.90  | 0.84  | 0.78  | 0.72  | 0.66  | 0.55  | 0.45  | 0.39  | 0.33  | 0.29  | 0.21  | 0.15  |

| Country      | GloFAS ID | Station filter | LT1  | LT2  | LT3  | LT4  | LT5  | LT6  | LT7  | LT8   | LT9   | LT10  | LT12  | LT14  | LT16  | LT18  | LT20  | LT25  | L30   |
|--------------|-----------|----------------|------|------|------|------|------|------|------|-------|-------|-------|-------|-------|-------|-------|-------|-------|-------|
| Somalia      | G5228     | 1              | 1.00 | 1.00 | 1.00 | 0.99 | 0.99 | 0.97 | 0.91 | 0.82  | 0.71  | 0.57  | 0.28  | 0.00  | -0.23 | -0.40 | -0.54 | -0.75 | -0.81 |
| Somalia      | G5229     | 1              | 1.00 | 1.00 | 0.99 | 0.99 | 0.98 | 0.94 | 0.86 | 0.74  | 0.60  | 0.45  | 0.16  | -0.05 | -0.19 | -0.29 | -0.39 | -0.53 | -0.50 |
| Somalia      | G5239     | 1              | 1.00 | 1.00 | 1.00 | 0.99 | 0.99 | 0.98 | 0.96 | 0.94  | 0.92  | 0.89  | 0.82  | 0.75  | 0.68  | 0.61  | 0.55  | 0.44  | 0.36  |
| Somalia      | G5244     | 1              | 1.00 | 1.00 | 1.00 | 0.99 | 0.99 | 0.97 | 0.92 | 0.84  | 0.72  | 0.58  | 0.28  | 0.00  | -0.23 | -0.40 | -0.54 | -0.76 | -0.81 |
| Somalia      | G6083     | 1              | 1.00 | 1.00 | 1.00 | 0.99 | 0.98 | 0.95 | 0.89 | 0.79  | 0.66  | 0.52  | 0.21  | -0.06 | -0.28 | -0.44 | -0.56 | -0.77 | -0.80 |
| Somalia      | G6084     | 1              | 1.00 | 1.00 | 1.00 | 0.99 | 0.98 | 0.94 | 0.86 | 0.75  | 0.62  | 0.47  | 0.16  | -0.11 | -0.32 | -0.47 | -0.59 | -0.78 | -0.80 |
| Somalia      | G6085     | 1              | 1.00 | 1.00 | 1.00 | 0.99 | 0.98 | 0.96 | 0.90 | 0.80  | 0.66  | 0.51  | 0.20  | -0.07 | -0.29 | -0.45 | -0.57 | -0.78 | -0.80 |
| Somalia      | G6086     | 1              | 1.00 | 1.00 | 1.00 | 0.99 | 0.99 | 0.96 | 0.90 | 0.81  | 0.68  | 0.54  | 0.24  | -0.03 | -0.26 | -0.42 | -0.55 | -0.76 | -0.81 |
| Somalia      | G6087     | 1              | 1.00 | 1.00 | 1.00 | 0.99 | 0.96 | 0.90 | 0.80 | 0.66  | 0.51  | 0.34  | 0.04  | -0.21 | -0.40 | -0.54 | -0.64 | -0.80 | -0.78 |
| Somalia      | G6088     | 1              | 1.00 | 0.99 | 0.94 | 0.76 | 0.52 | 0.27 | 0.06 | -0.11 | -0.22 | -0.31 | -0.41 | -0.48 | -0.55 | -0.60 | -0.64 | -0.50 | -0.48 |
| Somalia      | G6089     | 1              | 1.00 | 0.99 | 0.96 | 0.84 | 0.64 | 0.40 | 0.18 | -0.01 | -0.15 | -0.25 | -0.38 | -0.46 | -0.53 | -0.59 | -0.64 | -0.53 | -0.49 |
| Somalia      | G6090     | 1              | 1.00 | 0.99 | 0.91 | 0.71 | 0.45 | 0.20 | 0.00 | -0.15 | -0.26 | -0.34 | -0.43 | -0.50 | -0.56 | -0.61 | -0.64 | -0.49 | -0.48 |
| South Africa | G1417     | 1              | 0.97 | 0.95 | 0.90 | 0.83 | 0.80 | 0.76 | 0.68 | 0.60  | 0.56  | 0.51  | 0.38  | 0.30  | 0.24  | 0.22  | 0.18  | 0.13  | 0.10  |
| South Africa | G1418     | 1              | 0.97 | 0.95 | 0.90 | 0.83 | 0.80 | 0.76 | 0.68 | 0.60  | 0.56  | 0.51  | 0.38  | 0.30  | 0.24  | 0.22  | 0.18  | 0.13  | 0.10  |
| South Africa | G1420     | 1              | 1.00 | 0.98 | 0.95 | 0.92 | 0.88 | 0.84 | 0.78 | 0.72  | 0.70  | 0.64  | 0.54  | 0.45  | 0.38  | 0.31  | 0.27  | 0.19  | 0.14  |
| South Africa | G1429     | 1              | 0.98 | 0.94 | 0.89 | 0.85 | 0.80 | 0.75 | 0.70 | 0.64  | 0.59  | 0.55  | 0.46  | 0.39  | 0.33  | 0.29  | 0.24  | 0.18  | 0.13  |
| South Africa | G1433     | 1              | 1.00 | 0.99 | 0.97 | 0.90 | 0.84 | 0.80 | 0.75 | 0.68  | 0.62  | 0.57  | 0.46  | 0.38  | 0.30  | 0.24  | 0.20  | 0.12  | 0.08  |
| South Africa | G1436     | 1              | 0.98 | 0.90 | 0.81 | 0.73 | 0.71 | 0.65 | 0.58 | 0.54  | 0.49  | 0.47  | 0.41  | 0.37  | 0.34  | 0.32  | 0.31  | 0.27  | 0.25  |
| South Africa | G1445     | 1              | 0.99 | 0.99 | 0.98 | 0.97 | 0.95 | 0.93 | 0.92 | 0.91  | 0.91  | 0.90  | 0.89  | 0.87  | 0.85  | 0.84  | 0.83  | 0.80  | 0.76  |
| South Africa | G1447     | 1              | 1.00 | 0.98 | 0.93 | 0.85 | 0.76 | 0.70 | 0.66 | 0.61  | 0.57  | 0.54  | 0.47  | 0.41  | 0.35  | 0.32  | 0.29  | 0.21  | 0.16  |
| South Africa | G1450     | 1              | 1.00 | 1.00 | 1.00 | 0.99 | 0.99 | 0.98 | 0.97 | 0.95  | 0.92  | 0.89  | 0.80  | 0.69  | 0.59  | 0.51  | 0.43  | 0.32  | 0.26  |
| South Africa | G1454     | 1              | 1.00 | 1.00 | 1.00 | 0.99 | 0.99 | 0.99 | 0.98 | 0.98  | 0.96  | 0.95  | 0.92  | 0.89  | 0.86  | 0.82  | 0.79  | 0.73  | 0.70  |
| South Africa | G1455     | 1              | 1.00 | 1.00 | 0.99 | 0.99 | 0.97 | 0.92 | 0.90 | 0.89  | 0.85  | 0.84  | 0.83  | 0.78  | 0.74  | 0.73  | 0.71  | 0.68  | 0.61  |
| South Africa | G1457     | 1              | 1.00 | 1.00 | 1.00 | 1.00 | 0.99 | 0.99 | 0.99 | 0.98  | 0.98  | 0.97  | 0.94  | 0.91  | 0.88  | 0.84  | 0.80  | 0.71  | 0.65  |
| South Africa | G1459     | 1              | 1.00 | 0.98 | 0.95 | 0.91 | 0.84 | 0.77 | 0.71 | 0.65  | 0.61  | 0.56  | 0.48  | 0.42  | 0.36  | 0.33  | 0.29  | 0.22  | 0.16  |
| South Africa | G1460     | 1              | 1.00 | 0.99 | 0.99 | 0.99 | 0.98 | 0.97 | 0.97 | 0.97  | 0.96  | 0.96  | 0.95  | 0.94  | 0.92  | 0.91  | 0.90  | 0.87  | 0.84  |
| South Africa | G1465     | 1              | 1.00 | 0.99 | 0.98 | 0.97 | 0.96 | 0.95 | 0.92 | 0.91  | 0.90  | 0.88  | 0.85  | 0.81  | 0.78  | 0.75  | 0.74  | 0.70  | 0.67  |
| South Africa | G1466     | 1              | 1.00 | 0.99 | 0.99 | 0.99 | 0.98 | 0.98 | 0.97 | 0.97  | 0.96  | 0.96  | 0.95  | 0.94  | 0.93  | 0.92  | 0.91  | 0.88  | 0.84  |
| South Africa | G1471     | 1              | 0.97 | 0.89 | 0.82 | 0.74 | 0.66 | 0.60 | 0.54 | 0.47  | 0.41  | 0.37  | 0.29  | 0.23  | 0.17  | 0.14  | 0.09  | -0.02 | -0.04 |
| South Africa | G1473     | 1              | 0.99 | 0.98 | 0.97 | 0.97 | 0.95 | 0.92 | 0.88 | 0.84  | 0.80  | 0.77  | 0.69  | 0.57  | 0.51  | 0.44  | 0.39  | 0.25  | 0.18  |
| South Africa | G1475     | 1              | 0.99 | 0.94 | 0.86 | 0.79 | 0.72 | 0.65 | 0.59 | 0.53  | 0.47  | 0.42  | 0.34  | 0.27  | 0.21  | 0.17  | 0.12  | 0.01  | -0.03 |
| South Africa | G1476     | 1              | 1.00 | 0.99 | 0.98 | 0.96 | 0.90 | 0.84 | 0.81 | 0.78  | 0.73  | 0.68  | 0.57  | 0.40  | 0.32  | 0.25  | 0.17  | 0.10  | -0.01 |
| South Africa | G1488     | 1              | 0.99 | 0.98 | 0.96 | 0.94 | 0.92 | 0.90 | 0.88 | 0.85  | 0.83  | 0.80  | 0.74  | 0.68  | 0.61  | 0.56  | 0.50  | 0.40  | 0.32  |
| South Africa | G1490     | 1              | 0.90 | 0.83 | 0.78 | 0.74 | 0.70 | 0.66 | 0.63 | 0.59  | 0.56  | 0.53  | 0.49  | 0.43  | 0.39  | 0.36  | 0.33  | 0.26  | 0.21  |
| South Africa | G1493     | 1              | 1.00 | 0.98 | 0.97 | 0.95 | 0.93 | 0.89 | 0.88 | 0.86  | 0.84  | 0.82  | 0.79  | 0.74  | 0.71  | 0.69  | 0.64  | 0.59  | 0.53  |
| South Africa | G1608     | 1              | 1.00 | 1.00 | 1.00 | 1.00 | 0.99 | 0.99 | 0.99 | 0.98  | 0.98  | 0.97  | 0.94  | 0.91  | 0.88  | 0.85  | 0.80  | 0.71  | 0.65  |
| South Africa | G1609     | 1              | 1.00 | 1.00 | 1.00 | 1.00 | 0.99 | 0.99 | 0.99 | 0.98  | 0.98  | 0.97  | 0.94  | 0.91  | 0.88  | 0.84  | 0.80  | 0.71  | 0.65  |
| South Africa | G1610     | 1              | 1.00 | 1.00 | 1.00 | 1.00 | 1.00 | 0.99 | 0.99 | 0.99  | 0.98  | 0.97  | 0.94  | 0.91  | 0.88  | 0.84  | 0.80  | 0.71  | 0.66  |
| South Africa | G1611     | 1              | 1.00 | 1.00 | 1.00 | 1.00 | 0.99 | 0.99 | 0.99 | 0.98  | 0.97  | 0.96  | 0.93  | 0.90  | 0.87  | 0.83  | 0.78  | 0.70  | 0.65  |

| Country      | GloFAS ID | Station filter | LT1  | LT2  | LT3  | LT4  | LT5  | LT6  | LT7  | LT8  | LT9  | LT10 | LT12 | LT14 | LT16 | LT18 | LT20 | LT25 | L30  |
|--------------|-----------|----------------|------|------|------|------|------|------|------|------|------|------|------|------|------|------|------|------|------|
| South Africa | G1612     | 1              | 1.00 | 1.00 | 1.00 | 0.99 | 0.99 | 0.99 | 0.98 | 0.98 | 0.97 | 0.95 | 0.92 | 0.89 | 0.86 | 0.82 | 0.78 | 0.71 | 0.68 |
| South Africa | G1613     | 1              | 1.00 | 1.00 | 1.00 | 0.99 | 0.99 | 0.99 | 0.98 | 0.98 | 0.96 | 0.95 | 0.92 | 0.88 | 0.86 | 0.82 | 0.78 | 0.71 | 0.68 |
| South Africa | G1614     | 1              | 1.00 | 1.00 | 1.00 | 0.99 | 0.99 | 0.99 | 0.98 | 0.98 | 0.96 | 0.95 | 0.92 | 0.89 | 0.86 | 0.82 | 0.79 | 0.73 | 0.70 |
| South Africa | G1615     | 1              | 1.00 | 1.00 | 1.00 | 0.99 | 0.99 | 0.99 | 0.98 | 0.98 | 0.96 | 0.95 | 0.92 | 0.88 | 0.86 | 0.82 | 0.78 | 0.71 | 0.68 |
| South Africa | G1616     | 1              | 1.00 | 1.00 | 1.00 | 0.99 | 0.99 | 0.99 | 0.98 | 0.98 | 0.96 | 0.95 | 0.92 | 0.88 | 0.86 | 0.82 | 0.78 | 0.71 | 0.68 |
| South Africa | G1617     | 1              | 1.00 | 1.00 | 1.00 | 1.00 | 1.00 | 0.99 | 0.99 | 0.98 | 0.97 | 0.95 | 0.92 | 0.89 | 0.87 | 0.83 | 0.80 | 0.74 | 0.71 |
| South Africa | G1618     | 1              | 1.00 | 1.00 | 1.00 | 1.00 | 0.99 | 0.99 | 0.98 | 0.96 | 0.94 | 0.93 | 0.90 | 0.88 | 0.84 | 0.81 | 0.78 | 0.74 | 0.70 |
| South Africa | G1619     | 1              | 1.00 | 0.99 | 0.98 | 0.97 | 0.96 | 0.95 | 0.92 | 0.91 | 0.90 | 0.88 | 0.85 | 0.81 | 0.78 | 0.75 | 0.74 | 0.70 | 0.67 |
| South Africa | G1620     | 1              | 1.00 | 0.99 | 0.99 | 0.98 | 0.97 | 0.94 | 0.90 | 0.89 | 0.87 | 0.83 | 0.81 | 0.74 | 0.72 | 0.68 | 0.66 | 0.61 | 0.56 |
| South Africa | G1621     | 1              | 1.00 | 0.99 | 0.99 | 0.98 | 0.97 | 0.94 | 0.90 | 0.89 | 0.86 | 0.82 | 0.80 | 0.74 | 0.71 | 0.68 | 0.66 | 0.61 | 0.56 |
| South Africa | G1622     | 1              | 1.00 | 1.00 | 0.99 | 0.99 | 0.97 | 0.92 | 0.90 | 0.89 | 0.85 | 0.84 | 0.83 | 0.78 | 0.74 | 0.73 | 0.71 | 0.68 | 0.61 |
| South Africa | G1623     | 1              | 1.00 | 1.00 | 0.99 | 0.99 | 0.97 | 0.92 | 0.90 | 0.89 | 0.85 | 0.84 | 0.83 | 0.78 | 0.74 | 0.73 | 0.71 | 0.68 | 0.61 |
| South Africa | G1624     | 1              | 1.00 | 0.99 | 0.98 | 0.96 | 0.92 | 0.88 | 0.88 | 0.84 | 0.82 | 0.82 | 0.79 | 0.76 | 0.71 | 0.72 | 0.68 | 0.66 | 0.58 |
| South Africa | G1625     | 1              | 1.00 | 0.99 | 0.98 | 0.97 | 0.92 | 0.89 | 0.89 | 0.85 | 0.83 | 0.83 | 0.80 | 0.78 | 0.73 | 0.74 | 0.70 | 0.68 | 0.59 |
| South Africa | G1626     | 1              | 0.99 | 0.97 | 0.94 | 0.90 | 0.86 | 0.81 | 0.74 | 0.69 | 0.67 | 0.60 | 0.51 | 0.42 | 0.35 | 0.29 | 0.25 | 0.18 | 0.13 |
| South Africa | G1627     | 1              | 1.00 | 0.98 | 0.95 | 0.87 | 0.82 | 0.80 | 0.73 | 0.68 | 0.67 | 0.65 | 0.54 | 0.49 | 0.44 | 0.41 | 0.40 | 0.36 | 0.31 |
| South Africa | G1628     | 1              | 1.00 | 0.99 | 0.99 | 0.98 | 0.96 | 0.94 | 0.92 | 0.91 | 0.90 | 0.89 | 0.86 | 0.82 | 0.79 | 0.76 | 0.74 | 0.66 | 0.59 |
| South Africa | G1629     | 1              | 1.00 | 0.98 | 0.94 | 0.86 | 0.82 | 0.79 | 0.72 | 0.69 | 0.68 | 0.65 | 0.57 | 0.51 | 0.49 | 0.46 | 0.46 | 0.42 | 0.39 |
| South Africa | G1630     | 1              | 0.98 | 0.96 | 0.93 | 0.88 | 0.83 | 0.82 | 0.78 | 0.72 | 0.68 | 0.64 | 0.53 | 0.47 | 0.40 | 0.36 | 0.32 | 0.25 | 0.19 |
| South Africa | G1631     | 1              | 0.99 | 0.97 | 0.93 | 0.87 | 0.83 | 0.81 | 0.76 | 0.70 | 0.65 | 0.61 | 0.51 | 0.44 | 0.38 | 0.33 | 0.29 | 0.22 | 0.16 |
| South Africa | G1632     | 1              | 0.99 | 0.97 | 0.93 | 0.89 | 0.85 | 0.82 | 0.79 | 0.77 | 0.75 | 0.73 | 0.68 | 0.64 | 0.63 | 0.61 | 0.61 | 0.58 | 0.55 |
| South Africa | G1633     | 1              | 0.99 | 0.97 | 0.93 | 0.89 | 0.85 | 0.82 | 0.79 | 0.77 | 0.75 | 0.73 | 0.68 | 0.64 | 0.63 | 0.61 | 0.61 | 0.58 | 0.55 |
| South Africa | G1634     | 1              | 0.99 | 0.96 | 0.92 | 0.88 | 0.84 | 0.81 | 0.78 | 0.76 | 0.74 | 0.72 | 0.68 | 0.64 | 0.63 | 0.61 | 0.61 | 0.58 | 0.55 |
| South Africa | G1635     | 1              | 0.97 | 0.92 | 0.87 | 0.82 | 0.78 | 0.73 | 0.67 | 0.62 | 0.58 | 0.54 | 0.45 | 0.37 | 0.33 | 0.28 | 0.25 | 0.19 | 0.14 |
| South Africa | G1636     | 1              | 0.96 | 0.91 | 0.87 | 0.79 | 0.75 | 0.73 | 0.68 | 0.66 | 0.65 | 0.63 | 0.55 | 0.50 | 0.53 | 0.47 | 0.48 | 0.43 | 0.45 |
| South Africa | G1637     | 1              | 0.99 | 0.98 | 0.98 | 0.96 | 0.94 | 0.93 | 0.92 | 0.91 | 0.91 | 0.90 | 0.89 | 0.87 | 0.85 | 0.85 | 0.84 | 0.80 | 0.76 |
| South Africa | G1638     | 1              | 0.98 | 0.94 | 0.88 | 0.82 | 0.75 | 0.70 | 0.67 | 0.64 | 0.61 | 0.58 | 0.49 | 0.41 | 0.33 | 0.32 | 0.26 | 0.27 | 0.25 |
| South Africa | G1639     | 1              | 0.97 | 0.94 | 0.89 | 0.82 | 0.76 | 0.71 | 0.68 | 0.65 | 0.62 | 0.58 | 0.50 | 0.41 | 0.33 | 0.31 | 0.27 | 0.26 | 0.24 |
| South Africa | G1640     | 1              | 1.00 | 0.98 | 0.93 | 0.86 | 0.81 | 0.75 | 0.71 | 0.69 | 0.66 | 0.63 | 0.56 | 0.46 | 0.38 | 0.34 | 0.31 | 0.29 | 0.25 |
| South Africa | G1641     | 1              | 1.00 | 0.99 | 0.98 | 0.97 | 0.95 | 0.92 | 0.90 | 0.87 | 0.83 | 0.78 | 0.67 | 0.56 | 0.46 | 0.37 | 0.29 | 0.18 | 0.14 |
| South Africa | G1642     | 1              | 1.00 | 1.00 | 0.99 | 0.99 | 0.98 | 0.96 | 0.94 | 0.91 | 0.88 | 0.84 | 0.76 | 0.68 | 0.60 | 0.52 | 0.43 | 0.27 | 0.18 |
| South Africa | G1643     | 1              | 1.00 | 0.99 | 0.98 | 0.96 | 0.94 | 0.92 | 0.90 | 0.88 | 0.86 | 0.84 | 0.81 | 0.75 | 0.71 | 0.67 | 0.62 | 0.51 | 0.42 |
| South Africa | G1644     | 1              | 1.00 | 1.00 | 0.99 | 0.97 | 0.95 | 0.92 | 0.90 | 0.86 | 0.82 | 0.77 | 0.66 | 0.55 | 0.44 | 0.34 | 0.28 | 0.16 | 0.12 |
| South Africa | G1645     | 1              | 0.95 | 0.92 | 0.89 | 0.82 | 0.75 | 0.70 | 0.66 | 0.58 | 0.52 | 0.47 | 0.37 | 0.29 | 0.21 | 0.17 | 0.13 | 0.08 | 0.06 |
| South Africa | G1646     | 1              | 0.99 | 0.98 | 0.96 | 0.93 | 0.92 | 0.89 | 0.85 | 0.80 | 0.75 | 0.69 | 0.57 | 0.45 | 0.34 | 0.26 | 0.21 | 0.11 | 0.09 |
| South Africa | G1647     | 1              | 0.97 | 0.91 | 0.85 | 0.78 | 0.71 | 0.65 | 0.58 | 0.52 | 0.47 | 0.42 | 0.29 | 0.20 | 0.15 | 0.13 | 0.10 | 0.09 | 0.07 |
| South Africa | G1648     | 1              | 0.96 | 0.90 | 0.89 | 0.87 | 0.82 | 0.74 | 0.72 | 0.68 | 0.59 | 0.56 | 0.48 | 0.37 | 0.28 | 0.22 | 0.17 | 0.11 | 0.07 |
| South Africa | G1649     | 1              | 0.96 | 0.90 | 0.89 | 0.87 | 0.82 | 0.74 | 0.72 | 0.68 | 0.59 | 0.56 | 0.48 | 0.37 | 0.28 | 0.22 | 0.17 | 0.11 | 0.07 |
| South Africa | G1650     | 1              | 1.00 | 0.98 | 0.94 | 0.90 | 0.85 | 0.82 | 0.77 | 0.72 | 0.65 | 0.61 | 0.52 | 0.47 | 0.41 | 0.37 | 0.34 | 0.29 | 0.24 |

| Country      | GloFAS ID | Station filter | LT1  | LT2  | LT3  | LT4  | LT5  | LT6  | LT7  | LT8  | LT9  | LT10 | LT12 | LT14 | LT16 | LT18 | LT20 | LT25  | L30   |
|--------------|-----------|----------------|------|------|------|------|------|------|------|------|------|------|------|------|------|------|------|-------|-------|
| South Africa | G1651     | 1              | 0.99 | 0.96 | 0.95 | 0.94 | 0.89 | 0.82 | 0.79 | 0.74 | 0.67 | 0.62 | 0.54 | 0.43 | 0.33 | 0.26 | 0.19 | 0.13  | 0.08  |
| South Africa | G1652     | 1              | 1.00 | 0.99 | 0.98 | 0.96 | 0.92 | 0.86 | 0.82 | 0.77 | 0.71 | 0.66 | 0.57 | 0.46 | 0.36 | 0.29 | 0.21 | 0.15  | 0.10  |
| South Africa | G1653     | 1              | 1.00 | 1.00 | 0.99 | 0.98 | 0.96 | 0.93 | 0.89 | 0.85 | 0.80 | 0.75 | 0.66 | 0.56 | 0.46 | 0.40 | 0.34 | 0.24  | 0.20  |
| South Africa | G1654     | 1              | 0.98 | 0.91 | 0.83 | 0.75 | 0.67 | 0.61 | 0.54 | 0.48 | 0.43 | 0.39 | 0.32 | 0.26 | 0.20 | 0.17 | 0.13 | 0.07  | 0.05  |
| South Africa | G1655     | 1              | 1.00 | 0.99 | 0.98 | 0.95 | 0.93 | 0.91 | 0.89 | 0.86 | 0.84 | 0.81 | 0.75 | 0.68 | 0.62 | 0.56 | 0.52 | 0.41  | 0.34  |
| South Africa | G1656     | 1              | 0.98 | 0.93 | 0.86 | 0.79 | 0.71 | 0.64 | 0.58 | 0.53 | 0.48 | 0.43 | 0.36 | 0.29 | 0.24 | 0.22 | 0.20 | 0.18  | 0.14  |
| South Africa | G1657     | 1              | 1.00 | 0.97 | 0.91 | 0.85 | 0.79 | 0.74 | 0.71 | 0.69 | 0.66 | 0.62 | 0.55 | 0.45 | 0.38 | 0.34 | 0.31 | 0.28  | 0.24  |
| South Africa | G1658     | 1              | 1.00 | 0.97 | 0.91 | 0.85 | 0.79 | 0.74 | 0.71 | 0.69 | 0.66 | 0.62 | 0.55 | 0.45 | 0.38 | 0.34 | 0.31 | 0.28  | 0.24  |
| South Africa | G1659     | 1              | 1.00 | 1.00 | 0.99 | 0.98 | 0.96 | 0.92 | 0.87 | 0.84 | 0.80 | 0.77 | 0.71 | 0.55 | 0.47 | 0.38 | 0.29 | 0.15  | 0.08  |
| South Africa | G1660     | 1              | 1.00 | 0.99 | 0.94 | 0.84 | 0.72 | 0.67 | 0.61 | 0.55 | 0.53 | 0.49 | 0.37 | 0.28 | 0.21 | 0.15 | 0.12 | 0.05  | -0.04 |
| South Africa | G1661     | 1              | 1.00 | 0.99 | 0.99 | 0.97 | 0.90 | 0.82 | 0.77 | 0.71 | 0.66 | 0.63 | 0.59 | 0.54 | 0.47 | 0.45 | 0.41 | 0.34  | 0.27  |
| South Africa | G1662     | 1              | 1.00 | 0.98 | 0.93 | 0.85 | 0.76 | 0.70 | 0.66 | 0.61 | 0.57 | 0.54 | 0.47 | 0.41 | 0.35 | 0.32 | 0.28 | 0.21  | 0.16  |
| South Africa | G1663     | 1              | 0.99 | 0.94 | 0.87 | 0.79 | 0.71 | 0.63 | 0.56 | 0.51 | 0.47 | 0.43 | 0.35 | 0.29 | 0.25 | 0.24 | 0.22 | 0.19  | 0.15  |
| South Africa | G1664     | 1              | 0.99 | 0.96 | 0.87 | 0.76 | 0.69 | 0.64 | 0.60 | 0.55 | 0.52 | 0.50 | 0.43 | 0.37 | 0.32 | 0.30 | 0.28 | 0.21  | 0.17  |
| South Africa | G1665     | 1              | 0.97 | 0.90 | 0.77 | 0.66 | 0.58 | 0.50 | 0.43 | 0.39 | 0.35 | 0.32 | 0.23 | 0.18 | 0.13 | 0.12 | 0.11 | 0.03  | 0.00  |
| South Africa | G1666     | 1              | 1.00 | 1.00 | 0.99 | 0.97 | 0.89 | 0.82 | 0.77 | 0.71 | 0.66 | 0.64 | 0.60 | 0.54 | 0.48 | 0.46 | 0.41 | 0.34  | 0.27  |
| South Africa | G1667     | 1              | 1.00 | 1.00 | 0.99 | 0.98 | 0.95 | 0.91 | 0.87 | 0.84 | 0.79 | 0.73 | 0.64 | 0.53 | 0.47 | 0.40 | 0.34 | 0.28  | 0.23  |
| South Africa | G1668     | 1              | 0.98 | 0.96 | 0.92 | 0.82 | 0.73 | 0.73 | 0.67 | 0.61 | 0.59 | 0.56 | 0.44 | 0.38 | 0.35 | 0.31 | 0.30 | 0.29  | 0.22  |
| South Africa | G1669     | 1              | 0.97 | 0.85 | 0.73 | 0.64 | 0.59 | 0.53 | 0.48 | 0.44 | 0.42 | 0.39 | 0.34 | 0.28 | 0.29 | 0.26 | 0.24 | 0.19  | 0.17  |
| South Africa | G1670     | 1              | 0.98 | 0.91 | 0.77 | 0.65 | 0.57 | 0.49 | 0.42 | 0.38 | 0.34 | 0.32 | 0.24 | 0.18 | 0.14 | 0.14 | 0.12 | 0.05  | 0.02  |
| South Africa | G1671     | 1              | 0.96 | 0.83 | 0.71 | 0.63 | 0.58 | 0.52 | 0.47 | 0.44 | 0.42 | 0.38 | 0.34 | 0.28 | 0.29 | 0.25 | 0.24 | 0.19  | 0.18  |
| South Africa | G1672     | 1              | 0.99 | 0.95 | 0.87 | 0.74 | 0.72 | 0.71 | 0.61 | 0.60 | 0.61 | 0.58 | 0.50 | 0.43 | 0.47 | 0.40 | 0.44 | 0.37  | 0.41  |
| South Africa | G1673     | 1              | 0.97 | 0.90 | 0.80 | 0.71 | 0.65 | 0.59 | 0.51 | 0.45 | 0.42 | 0.37 | 0.29 | 0.24 | 0.20 | 0.17 | 0.15 | 0.11  | 0.12  |
| South Africa | G1674     | 1              | 1.00 | 0.99 | 0.96 | 0.91 | 0.85 | 0.80 | 0.72 | 0.64 | 0.58 | 0.53 | 0.44 | 0.37 | 0.31 | 0.27 | 0.26 | 0.18  | 0.17  |
| South Africa | G1675     | 1              | 1.00 | 0.98 | 0.95 | 0.86 | 0.78 | 0.75 | 0.70 | 0.65 | 0.65 | 0.65 | 0.55 | 0.50 | 0.46 | 0.43 | 0.39 | 0.33  | 0.29  |
| South Africa | G1676     | 1              | 0.97 | 0.92 | 0.87 | 0.80 | 0.76 | 0.72 | 0.66 | 0.59 | 0.55 | 0.50 | 0.42 | 0.38 | 0.33 | 0.29 | 0.29 | 0.22  | 0.19  |
| South Africa | G1677     | 1              | 0.95 | 0.91 | 0.88 | 0.85 | 0.81 | 0.78 | 0.77 | 0.76 | 0.73 | 0.72 | 0.67 | 0.66 | 0.65 | 0.64 | 0.62 | 0.61  | 0.61  |
| South Africa | G1678     | 1              | 0.83 | 0.71 | 0.61 | 0.56 | 0.52 | 0.45 | 0.41 | 0.38 | 0.37 | 0.35 | 0.30 | 0.27 | 0.26 | 0.24 | 0.25 | 0.24  | 0.22  |
| South Africa | G1679     | 1              | 0.98 | 0.92 | 0.77 | 0.66 | 0.59 | 0.51 | 0.43 | 0.35 | 0.31 | 0.27 | 0.20 | 0.13 | 0.10 | 0.07 | 0.04 | -0.03 | -0.03 |
| South Africa | G1680     | 1              | 1.00 | 0.99 | 0.96 | 0.88 | 0.77 | 0.74 | 0.71 | 0.64 | 0.59 | 0.56 | 0.44 | 0.38 | 0.32 | 0.29 | 0.27 | 0.25  | 0.19  |
| South Africa | G1681     | 1              | 1.00 | 0.97 | 0.94 | 0.91 | 0.88 | 0.85 | 0.83 | 0.81 | 0.80 | 0.78 | 0.73 | 0.67 | 0.62 | 0.58 | 0.56 | 0.50  | 0.45  |
| South Africa | G1682     | 1              | 0.98 | 0.91 | 0.76 | 0.65 | 0.58 | 0.50 | 0.42 | 0.34 | 0.31 | 0.27 | 0.20 | 0.13 | 0.10 | 0.07 | 0.04 | -0.04 | -0.03 |
| South Africa | G1683     | 1              | 0.99 | 0.92 | 0.81 | 0.70 | 0.63 | 0.59 | 0.54 | 0.49 | 0.46 | 0.44 | 0.37 | 0.32 | 0.29 | 0.28 | 0.27 | 0.22  | 0.17  |
| South Africa | G5862     | 1              | 0.99 | 0.95 | 0.90 | 0.82 | 0.67 | 0.64 | 0.62 | 0.53 | 0.50 | 0.50 | 0.42 | 0.40 | 0.33 | 0.35 | 0.31 | 0.31  | 0.29  |
| South Africa | G5899     | 1              | 1.00 | 0.98 | 0.96 | 0.95 | 0.93 | 0.88 | 0.85 | 0.82 | 0.77 | 0.73 | 0.66 | 0.56 | 0.47 | 0.39 | 0.33 | 0.22  | 0.16  |
| South Africa | G5923     | 1              | 1.00 | 1.00 | 1.00 | 0.97 | 0.94 | 0.94 | 0.95 | 0.92 | 0.85 | 0.83 | 0.74 | 0.72 | 0.65 | 0.62 | 0.55 | 0.46  | 0.39  |
| South Africa | G5937     | 1              | 1.00 | 1.00 | 1.00 | 1.00 | 1.00 | 0.99 | 0.99 | 0.97 | 0.96 | 0.94 | 0.87 | 0.81 | 0.73 | 0.68 | 0.62 | 0.45  | 0.30  |
| South Africa | G5940     | 1              | 1.00 | 1.00 | 1.00 | 0.98 | 0.96 | 0.93 | 0.90 | 0.87 | 0.83 | 0.78 | 0.68 | 0.62 | 0.55 | 0.47 | 0.42 | 0.30  | 0.20  |
| South Africa | G5942     | 1              | 1.00 | 1.00 | 1.00 | 0.98 | 0.96 | 0.95 | 0.91 | 0.88 | 0.85 | 0.82 | 0.71 | 0.65 | 0.58 | 0.51 | 0.45 | 0.32  | 0.22  |



| Country      | GloFAS ID | Station filter | LT1  | LT2  | LT3  | LT4  | LT5  | LT6  | LT7  | LT8   | LT9   | LT10  | LT12  | LT14  | LT16  | LT18  | LT20  | LT25  | L30   |
|--------------|-----------|----------------|------|------|------|------|------|------|------|-------|-------|-------|-------|-------|-------|-------|-------|-------|-------|
| South Africa | G5954     | 1              | 1.00 | 1.00 | 1.00 | 1.00 | 0.99 | 0.98 | 0.97 | 0.95  | 0.93  | 0.91  | 0.86  | 0.79  | 0.73  | 0.65  | 0.60  | 0.48  | 0.33  |
| South Africa | G5956     | 1              | 0.99 | 0.95 | 0.89 | 0.82 | 0.75 | 0.68 | 0.62 | 0.55  | 0.51  | 0.45  | 0.36  | 0.32  | 0.28  | 0.25  | 0.24  | 0.20  | 0.18  |
| South Africa | G5959     | 1              | 1.00 | 1.00 | 1.00 | 0.99 | 0.96 | 0.91 | 0.84 | 0.81  | 0.78  | 0.73  | 0.70  | 0.61  | 0.53  | 0.44  | 0.39  | 0.29  | 0.28  |
| South Africa | G5960     | 1              | 0.97 | 0.93 | 0.86 | 0.79 | 0.72 | 0.64 | 0.59 | 0.53  | 0.48  | 0.43  | 0.36  | 0.29  | 0.24  | 0.22  | 0.20  | 0.18  | 0.14  |
| South Africa | G5971     | 1              | 0.99 | 0.98 | 0.96 | 0.90 | 0.82 | 0.81 | 0.76 | 0.69  | 0.68  | 0.65  | 0.55  | 0.50  | 0.44  | 0.41  | 0.39  | 0.35  | 0.30  |
| South Africa | G5974     | 1              | 0.99 | 0.98 | 0.92 | 0.83 | 0.70 | 0.64 | 0.58 | 0.52  | 0.49  | 0.45  | 0.33  | 0.23  | 0.17  | 0.11  | 0.08  | 0.02  | -0.06 |
| South Africa | G5980     | 1              | 1.00 | 1.00 | 1.00 | 1.00 | 1.00 | 0.99 | 0.99 | 0.99  | 0.98  | 0.98  | 0.95  | 0.92  | 0.89  | 0.87  | 0.82  | 0.73  | 0.67  |
| South Africa | G6037     | 1              | 1.00 | 0.99 | 0.95 | 0.89 | 0.83 | 0.77 | 0.71 | 0.66  | 0.61  | 0.55  | 0.44  | 0.33  | 0.26  | 0.21  | 0.15  | 0.07  | 0.04  |
| Sudan        | G1684     | 1              | 1.00 | 0.96 | 0.84 | 0.67 | 0.49 | 0.30 | 0.09 | -0.14 | -0.37 | -0.59 | -0.97 | -1.24 | -1.47 | -1.63 | -1.69 | -1.56 | -1.40 |
| Sudan        | G1685     | 1              | 1.00 | 0.99 | 0.97 | 0.93 | 0.88 | 0.81 | 0.73 | 0.63  | 0.52  | 0.39  | 0.08  | -0.23 | -0.55 | -0.85 | -1.11 | -1.53 | -1.66 |
| Sudan        | G1686     | 1              | 1.00 | 0.99 | 0.99 | 0.98 | 0.97 | 0.95 | 0.92 | 0.88  | 0.83  | 0.76  | 0.58  | 0.33  | 0.04  | -0.27 | -0.57 | -1.20 | -1.55 |
| Sudan        | G1687     | 1              | 0.99 | 0.97 | 0.94 | 0.93 | 0.91 | 0.88 | 0.85 | 0.81  | 0.77  | 0.72  | 0.58  | 0.38  | 0.14  | -0.09 | -0.34 | -0.91 | -1.25 |
| Sudan        | G1688     | 1              | 1.00 | 1.00 | 1.00 | 1.00 | 1.00 | 1.00 | 1.00 | 1.00  | 1.00  | 1.00  | 1.00  | 0.99  | 0.98  | 0.96  | 0.91  | 0.73  | 0.47  |
| Sudan        | G1689     | 1              | 1.00 | 1.00 | 1.00 | 0.99 | 0.99 | 0.99 | 0.99 | 0.98  | 0.98  | 0.98  | 0.97  | 0.96  | 0.95  | 0.93  | 0.92  | 0.87  | 0.81  |
| Sudan        | G1909     | 1              | 1.00 | 1.00 | 1.00 | 1.00 | 1.00 | 1.00 | 1.00 | 1.00  | 1.00  | 1.00  | 0.99  | 0.99  | 0.98  | 0.98  | 0.97  | 0.96  | 0.89  |
| Sudan        | G1910     | 1              | 1.00 | 1.00 | 1.00 | 1.00 | 1.00 | 1.00 | 1.00 | 1.00  | 1.00  | 1.00  | 1.00  | 1.00  | 0.99  | 0.99  | 0.98  | 0.96  | 0.94  |
| Sudan        | G1911     | 1              | 1.00 | 1.00 | 1.00 | 1.00 | 1.00 | 1.00 | 1.00 | 1.00  | 1.00  | 1.00  | 1.00  | 1.00  | 1.00  | 0.99  | 0.99  | 0.98  | 0.96  |
| Sudan        | G1912     | 1              | 1.00 | 1.00 | 1.00 | 0.99 | 0.96 | 0.92 | 0.88 | 0.82  | 0.74  | 0.65  | 0.41  | 0.12  | -0.18 | -0.49 | -0.78 | -1.35 | -1.60 |
| Sudan        | G1913     | 1              | 1.00 | 0.99 | 0.99 | 0.98 | 0.97 | 0.95 | 0.92 | 0.88  | 0.83  | 0.76  | 0.58  | 0.33  | 0.05  | -0.26 | -0.56 | -1.19 | -1.54 |
| Sudan        | G1914     | 1              | 1.00 | 1.00 | 1.00 | 1.00 | 1.00 | 1.00 | 1.00 | 1.00  | 1.00  | 1.00  | 1.00  | 1.00  | 1.00  | 0.99  | 0.99  | 0.99  | 0.97  |
| Sudan        | G1915     | 1              | 1.00 | 1.00 | 0.99 | 0.99 | 0.98 | 0.97 | 0.97 | 0.96  | 0.95  | 0.93  | 0.90  | 0.85  | 0.78  | 0.71  | 0.63  | 0.44  | 0.31  |
| Sudan        | G4648     | 0              | -    | -    | -    | -    | -    | -    | -    | -     | -     | -     | -     | -     | -     | -     | -     | -     | -     |
| Sudan        | G4653     | 0              | -    | -    | -    | -    | -    | -    | -    | -     | -     | -     | -     | -     | -     | -     | -     | -     | -     |
| Sudan        | G4706     | 0              | -    | -    | -    | -    | -    | -    | -    | -     | -     | -     | -     | -     | -     | -     | -     | -     | -     |
| Sudan        | G4710     | 1              | 1.00 | 1.00 | 1.00 | 1.00 | 1.00 | 1.00 | 1.00 | 1.00  | 1.00  | 1.00  | 1.00  | 1.00  | 0.99  | 0.97  | 0.94  | 0.77  | 0.52  |
| Sudan        | G4748     | 1              | 1.00 | 1.00 | 1.00 | 1.00 | 1.00 | 1.00 | 1.00 | 0.99  | 0.99  | 0.98  | 0.96  | 0.91  | 0.85  | 0.76  | 0.66  | 0.37  | 0.13  |
| Sudan        | G4749     | 0              | -    | -    | -    | -    | -    | -    | -    | -     | -     | -     | -     | -     | -     | -     | -     | -     | -     |
| Sudan        | G4757     | 0              | -    | -    | -    | -    | -    | -    | -    | -     | -     | -     | -     | -     | -     | -     | -     | -     | -     |
| Sudan        | G4762     | 0              | -    | -    | -    | -    | -    | -    | -    | -     | -     | -     | -     | -     | -     | -     | -     | -     | -     |
| Sudan        | G4765     | 1              | 1.00 | 1.00 | 1.00 | 1.00 | 1.00 | 1.00 | 0.99 | 0.99  | 0.99  | 0.99  | 0.99  | 0.98  | 0.96  | 0.93  | 0.91  | 0.80  | 0.72  |
| Sudan        | G4766     | 1              | 1.00 | 0.99 | 0.99 | 0.99 | 0.98 | 0.97 | 0.96 | 0.96  | 0.93  | 0.87  | 0.83  | 0.84  | 0.86  | 0.85  | 0.22  | -1.28 | -2.73 |
| Sudan        | G4769     | 1              | 1.00 | 1.00 | 1.00 | 1.00 | 1.00 | 1.00 | 0.99 | 0.99  | 0.99  | 0.99  | 0.97  | 0.95  | 0.92  | 0.90  | 0.87  | 0.79  | 0.68  |
| Sudan        | G4772     | 1              | 1.00 | 1.00 | 1.00 | 1.00 | 1.00 | 0.99 | 0.99 | 0.99  | 0.99  | 0.99  | 0.99  | 0.99  | 0.97  | 0.97  | 0.95  | 0.89  | 0.77  |
| Sudan        | G4773     | 0              | -    | -    | -    | -    | -    | -    | -    | -     | -     | -     | -     | -     | -     | -     | -     | -     | -     |
| Sudan        | G4774     | 1              | 1.00 | 1.00 | 1.00 | 1.00 | 1.00 | 1.00 | 1.00 | 1.00  | 1.00  | 1.00  | 1.00  | 0.99  | 0.97  | 0.93  | 0.87  | 0.66  | 0.39  |
| Sudan        | G4781     | 1              | 1.00 | 1.00 | 1.00 | 1.00 | 1.00 | 1.00 | 1.00 | 1.00  | 1.00  | 1.00  | 0.99  | 0.98  | 0.95  | 0.90  | 0.83  | 0.59  | 0.33  |
| Sudan        | G4787     | 1              | 1.00 | 1.00 | 1.00 | 1.00 | 1.00 | 1.00 | 1.00 | 1.00  | 1.00  | 1.00  | 0.99  | 0.98  | 0.96  | 0.92  | 0.86  | 0.63  | 0.36  |
| Sudan        | G4788     | 0              | -    | -    | -    | -    | -    | -    | -    | -     | -     | -     | -     | -     | -     | -     | -     | -     | -     |
| Sudan        | G4789     | 0              | -    | -    | -    | -    | -    | -    | -    | -     | -     | -     | -     | -     | -     | -     | -     | -     | -     |

| Country | GloFAS ID | Station filter | LT1  | LT2  | LT3  | LT4  | LT5  | LT6   | LT7   | LT8   | LT9   | LT10  | LT12  | LT14  | LT16  | LT18   | LT20   | LT25   | L30    |
|---------|-----------|----------------|------|------|------|------|------|-------|-------|-------|-------|-------|-------|-------|-------|--------|--------|--------|--------|
| Sudan   | G4795     | 1              | 1.00 | 1.00 | 1.00 | 1.00 | 1.00 | 1.00  | 0.99  | 0.99  | 0.99  | 0.99  | 0.96  | 0.89  | 0.33  | 0.25   | 0.40   | 0.29   | -1.04  |
| Sudan   | G4796     | 0              | -    | -    | -    | -    | -    | -     | -     | -     | -     | -     | -     | -     | -     | -      | -      | -      | -      |
| Sudan   | G4803     | 1              | 1.00 | 1.00 | 1.00 | 1.00 | 1.00 | 1.00  | 1.00  | 0.98  | 0.95  | 0.89  | 0.66  | 0.35  | -0.01 | -0.36  | -0.70  | -1.30  | -1.63  |
| Sudan   | G4804     | 1              | 1.00 | 0.99 | 0.87 | 0.82 | 0.59 | 0.24  | 0.02  | 0.00  | 0.07  | -0.34 | -0.54 | -0.88 | -0.88 | -0.85  | -1.04  | -1.36  | -2.51  |
| Sudan   | G4805     | 1              | 1.00 | 0.98 | 0.94 | 0.85 | 0.74 | 0.61  | 0.47  | 0.34  | 0.23  | 0.14  | 0.01  | -0.06 | -0.12 | -0.16  | -0.20  | -0.19  | -0.19  |
| Sudan   | G4807     | 1              | 1.00 | 1.00 | 1.00 | 1.00 | 1.00 | 0.99  | 0.99  | 0.98  | 0.97  | 0.96  | 0.94  | 0.91  | 0.87  | 0.82   | 0.75   | 0.56   | 0.39   |
| Sudan   | G4812     | 0              | -    | -    | -    | -    | -    | -     | -     | -     | -     | -     | -     | -     | -     | -      | -      | -      | -      |
| Sudan   | G4813     | 0              | -    | -    | -    | -    | -    | -     | -     | -     | -     | -     | -     | -     | -     | -      | -      | -      | -      |
| Sudan   | G4818     | 0              | 1.00 | 1.00 | 1.00 | 1.00 | 1.00 | 1.00  | 1.00  | 1.00  | 1.00  | 1.00  | 1.00  | 0.93  | -3.55 | -47.72 | -30.92 | -21.60 | -25.28 |
| Sudan   | G4819     | 1              | 1.00 | 1.00 | 1.00 | 1.00 | 1.00 | 0.99  | 0.98  | 0.98  | 0.97  | 0.96  | 0.94  | 0.91  | 0.86  | 0.80   | 0.73   | 0.54   | 0.38   |
| Sudan   | G4820     | 1              | 1.00 | 1.00 | 1.00 | 1.00 | 1.00 | 1.00  | 1.00  | 1.00  | 1.00  | 1.00  | 0.95  | 0.92  | 0.89  | 0.87   | 0.85   | 0.75   | 0.45   |
| Sudan   | G4821     | 1              | 1.00 | 1.00 | 1.00 | 1.00 | 1.00 | 1.00  | 1.00  | 1.00  | 1.00  | 1.00  | 0.98  | 0.94  | 0.87  | 0.76   | 0.61   | 0.24   | -0.03  |
| Sudan   | G4822     | 1              | 1.00 | 1.00 | 1.00 | 1.00 | 1.00 | 1.00  | 1.00  | 1.00  | 1.00  | 0.99  | 0.98  | 0.94  | 0.87  | 0.75   | 0.59   | 0.22   | -0.04  |
| Sudan   | G4823     | 1              | 1.00 | 1.00 | 1.00 | 1.00 | 1.00 | 1.00  | 1.00  | 0.99  | 0.99  | 0.99  | 0.99  | 0.96  | 0.93  | 0.95   | 0.95   | 0.81   | 0.65   |
| Sudan   | G4824     | 1              | 1.00 | 1.00 | 1.00 | 1.00 | 1.00 | 1.00  | 1.00  | 1.00  | 1.00  | 1.00  | 0.99  | 0.99  | 0.96  | 0.95   | 0.92   | 0.84   | 0.81   |
| Sudan   | G4825     | 1              | 1.00 | 1.00 | 1.00 | 1.00 | 1.00 | 1.00  | 1.00  | 0.99  | 0.99  | 0.98  | 0.96  | 0.92  | 0.88  | 0.83   | 0.78   | 0.68   | 0.62   |
| Sudan   | G4826     | 1              | 1.00 | 1.00 | 1.00 | 1.00 | 1.00 | 0.99  | 0.98  | 0.94  | 0.86  | 0.73  | 0.40  | 0.02  | -0.37 | -0.73  | -1.03  | -1.51  | -1.68  |
| Sudan   | G4828     | 1              | 1.00 | 1.00 | 1.00 | 1.00 | 1.00 | 1.00  | 1.00  | 1.00  | 1.00  | 1.00  | 0.99  | 0.97  | 0.95  | 0.93   | 0.90   | 0.81   | 0.71   |
| Sudan   | G4854     | 0              | -    | -    | -    | -    | -    | -     | -     | -     | -     | -     | -     | -     | -     | -      | -      | -      | -      |
| Sudan   | G4858     | 1              | 1.00 | 1.00 | 1.00 | 1.00 | 1.00 | 1.00  | 1.00  | 1.00  | 0.99  | 0.99  | 0.89  | 0.91  | 0.93  | 0.93   | 0.93   | 0.91   | 0.88   |
| Sudan   | G4878     | 1              | 0.96 | 0.79 | 0.64 | 0.49 | 0.44 | 0.23  | 0.03  | -0.13 | -0.25 | -0.45 | -0.99 | -1.56 | -2.20 | -2.73  | -3.25  | -4.28  | -4.93  |
| Sudan   | G4879     | 1              | 0.99 | 0.97 | 0.94 | 0.93 | 0.91 | 0.88  | 0.85  | 0.81  | 0.76  | 0.71  | 0.57  | 0.37  | 0.13  | -0.11  | -0.36  | -0.93  | -1.27  |
| Sudan   | G4888     | 1              | 1.00 | 1.00 | 1.00 | 1.00 | 0.98 | 0.93  | 0.88  | 0.82  | 0.75  | 0.67  | 0.51  | 0.40  | 0.39  | 0.36   | 0.31   | -0.07  | -0.60  |
| Sudan   | G4889     | 1              | 0.91 | 0.64 | 0.44 | 0.31 | 0.23 | 0.17  | 0.12  | 0.08  | 0.04  | 0.01  | -0.05 | -0.08 | -0.11 | -0.10  | -0.10  | -0.10  | -0.10  |
| Sudan   | G4892     | 1              | 0.99 | 0.98 | 0.97 | 0.95 | 0.94 | 0.91  | 0.88  | 0.84  | 0.80  | 0.74  | 0.58  | 0.36  | 0.10  | -0.17  | -0.44  | -1.04  | -1.38  |
| Sudan   | G4894     | 1              | 1.00 | 0.97 | 0.85 | 0.64 | 0.40 | 0.19  | 0.02  | -0.09 | -0.18 | -0.24 | -0.32 | -0.37 | -0.39 | -0.43  | -0.43  | -0.32  | -0.38  |
| Sudan   | G4895     | 1              | 1.00 | 0.99 | 0.90 | 0.67 | 0.29 | -0.11 | -0.48 | -0.79 | -1.03 | -1.19 | -1.47 | -1.62 | -1.74 | -1.83  | -1.87  | -1.60  | -1.54  |
| Sudan   | G4899     | 1              | 0.93 | 0.75 | 0.61 | 0.51 | 0.46 | 0.41  | 0.37  | 0.33  | 0.29  | 0.27  | 0.22  | 0.17  | 0.15  | 0.14   | 0.13   | 0.12   | 0.10   |
| Sudan   | G4942     | 1              | 1.00 | 1.00 | 0.99 | 0.97 | 0.94 | 0.92  | 0.89  | 0.86  | 0.83  | 0.78  | 0.67  | 0.58  | 0.48  | 0.34   | 0.16   | -0.27  | -0.80  |
| Sudan   | G4944     | 1              | 1.00 | 1.00 | 1.00 | 1.00 | 0.99 | 0.99  | 0.99  | 0.98  | 0.97  | 0.96  | 0.93  | 0.90  | 0.87  | 0.82   | 0.75   | 0.56   | 0.35   |
| Sudan   | G4949     | 1              | 1.00 | 0.99 | 0.99 | 0.98 | 0.98 | 0.97  | 0.96  | 0.95  | 0.93  | 0.92  | 0.88  | 0.83  | 0.74  | 0.66   | 0.56   | 0.26   | -0.15  |
| Sudan   | G4950     | 1              | 1.00 | 1.00 | 0.99 | 0.99 | 0.98 | 0.97  | 0.96  | 0.94  | 0.93  | 0.91  | 0.85  | 0.75  | 0.67  | 0.58   | 0.48   | 0.17   | -0.19  |
| Sudan   | G4955     | 1              | 1.00 | 1.00 | 1.00 | 1.00 | 1.00 | 1.00  | 1.00  | 0.99  | 0.99  | 0.99  | 0.98  | 0.97  | 0.97  | 0.96   | 0.95   | 0.91   | 0.86   |
| Sudan   | G4956     | 1              | 1.00 | 1.00 | 0.99 | 0.97 | 0.95 | 0.93  | 0.89  | 0.85  | 0.81  | 0.76  | 0.66  | 0.57  | 0.47  | 0.39   | 0.31   | 0.15   | 0.03   |
| Sudan   | G4958     | 1              | 1.00 | 1.00 | 0.99 | 0.99 | 0.97 | 0.96  | 0.94  | 0.92  | 0.89  | 0.86  | 0.80  | 0.73  | 0.63  | 0.53   | 0.42   | 0.16   | -0.17  |
| Sudan   | G4959     | 1              | 1.00 | 1.00 | 1.00 | 0.99 | 0.99 | 0.99  | 0.98  | 0.97  | 0.96  | 0.95  | 0.92  | 0.87  | 0.80  | 0.73   | 0.65   | 0.42   | 0.07   |
| Sudan   | G4968     | 1              | 1.00 | 1.00 | 1.00 | 0.99 | 0.97 | 0.93  | 0.86  | 0.77  | 0.67  | 0.57  | 0.38  | 0.27  | 0.20  | 0.14   | 0.11   | 0.03   | -0.01  |
| Sudan   | G4970     | 1              | 1.00 | 1.00 | 1.00 | 1.00 | 0.99 | 0.97  | 0.95  | 0.91  | 0.86  | 0.80  | 0.67  | 0.53  | 0.40  | 0.30   | 0.21   | 0.14   | 0.13   |
| Sudan   | G4971     | 1              | 1.00 | 1.00 | 0.99 | 0.98 | 0.97 | 0.96  | 0.95  | 0.93  | 0.90  | 0.87  | 0.80  | 0.72  | 0.63  | 0.54   | 0.44   | 0.17   | -0.12  |

| Country | GloFAS ID | Station filter | LT1  | LT2  | LT3  | LT4  | LT5  | LT6  | LT7  | LT8  | LT9  | LT10 | LT12 | LT14 | LT16 | LT18  | LT20  | LT25  | L30   |
|---------|-----------|----------------|------|------|------|------|------|------|------|------|------|------|------|------|------|-------|-------|-------|-------|
| Sudan   | G4972     | 1              | 1.00 | 1.00 | 0.99 | 0.99 | 0.99 | 0.98 | 0.97 | 0.96 | 0.95 | 0.94 | 0.91 | 0.86 | 0.80 | 0.72  | 0.63  | 0.41  | 0.13  |
| Sudan   | G4973     | 1              | 1.00 | 0.99 | 0.98 | 0.97 | 0.95 | 0.93 | 0.90 | 0.86 | 0.82 | 0.78 | 0.69 | 0.58 | 0.48 | 0.38  | 0.30  | 0.16  | 0.02  |
| Sudan   | G4974     | 1              | 1.00 | 1.00 | 1.00 | 1.00 | 1.00 | 0.99 | 0.99 | 0.99 | 0.99 | 0.98 | 0.98 | 0.97 | 0.96 | 0.95  | 0.94  | 0.89  | 0.84  |
| Sudan   | G4975     | 1              | 1.00 | 1.00 | 1.00 | 1.00 | 1.00 | 0.99 | 0.99 | 0.99 | 0.98 | 0.98 | 0.97 | 0.96 | 0.94 | 0.92  | 0.89  | 0.81  | 0.70  |
| Sudan   | G4976     | 1              | 1.00 | 1.00 | 1.00 | 1.00 | 1.00 | 0.99 | 0.99 | 0.99 | 0.98 | 0.98 | 0.98 | 0.97 | 0.96 | 0.95  | 0.93  | 0.89  | 0.83  |
| Sudan   | G4981     | 1              | 1.00 | 1.00 | 1.00 | 0.99 | 0.99 | 0.99 | 0.98 | 0.98 | 0.98 | 0.97 | 0.96 | 0.95 | 0.93 | 0.91  | 0.88  | 0.78  | 0.68  |
| Sudan   | G4982     | 1              | 1.00 | 1.00 | 0.99 | 0.98 | 0.97 | 0.95 | 0.92 | 0.88 | 0.83 | 0.78 | 0.65 | 0.52 | 0.37 | 0.22  | 0.09  | -0.17 | -0.38 |
| Sudan   | G4985     | 1              | 1.00 | 1.00 | 0.99 | 0.99 | 0.98 | 0.98 | 0.97 | 0.96 | 0.95 | 0.94 | 0.91 | 0.87 | 0.81 | 0.74  | 0.66  | 0.45  | 0.28  |
| Sudan   | G4986     | 1              | 1.00 | 1.00 | 1.00 | 0.99 | 0.99 | 0.98 | 0.98 | 0.97 | 0.96 | 0.94 | 0.91 | 0.86 | 0.79 | 0.70  | 0.59  | 0.29  | -0.02 |
| Sudan   | G4987     | 1              | 1.00 | 1.00 | 0.99 | 0.99 | 0.99 | 0.98 | 0.98 | 0.97 | 0.96 | 0.95 | 0.92 | 0.88 | 0.83 | 0.77  | 0.72  | 0.56  | 0.28  |
| Sudan   | G4988     | 1              | 1.00 | 0.99 | 0.98 | 0.97 | 0.96 | 0.95 | 0.94 | 0.93 | 0.92 | 0.90 | 0.83 | 0.76 | 0.68 | 0.60  | 0.52  | 0.31  | 0.06  |
| Sudan   | G4996     | 1              | 1.00 | 0.99 | 0.99 | 0.98 | 0.98 | 0.97 | 0.96 | 0.95 | 0.94 | 0.92 | 0.88 | 0.82 | 0.75 | 0.66  | 0.57  | 0.35  | 0.16  |
| Sudan   | G4997     | 1              | 1.00 | 1.00 | 1.00 | 1.00 | 1.00 | 0.99 | 0.99 | 0.99 | 0.99 | 0.99 | 0.98 | 0.97 | 0.95 | 0.93  | 0.90  | 0.79  | 0.60  |
| Sudan   | G4998     | 1              | 1.00 | 0.99 | 0.99 | 0.99 | 0.99 | 0.99 | 0.98 | 0.98 | 0.98 | 0.98 | 0.97 | 0.97 | 0.96 | 0.95  | 0.94  | 0.90  | 0.82  |
| Sudan   | G4999     | 1              | 1.00 | 1.00 | 1.00 | 0.99 | 0.99 | 0.99 | 0.99 | 0.98 | 0.98 | 0.98 | 0.97 | 0.97 | 0.96 | 0.95  | 0.94  | 0.90  | 0.85  |
| Sudan   | G5002     | 1              | 1.00 | 1.00 | 0.99 | 0.99 | 0.99 | 0.99 | 0.99 | 0.99 | 0.99 | 0.98 | 0.98 | 0.97 | 0.97 | 0.97  | 0.96  | 0.91  | 0.85  |
| Sudan   | G5003     | 1              | 1.00 | 1.00 | 0.99 | 0.99 | 0.99 | 0.99 | 0.98 | 0.98 | 0.98 | 0.98 | 0.97 | 0.97 | 0.96 | 0.95  | 0.94  | 0.90  | 0.86  |
| Sudan   | G5007     | 1              | 1.00 | 1.00 | 0.99 | 0.99 | 0.99 | 0.98 | 0.98 | 0.97 | 0.96 | 0.95 | 0.92 | 0.90 | 0.86 | 0.82  | 0.78  | 0.62  | 0.43  |
| Sudan   | G5008     | 1              | 1.00 | 1.00 | 1.00 | 0.99 | 0.99 | 0.99 | 0.98 | 0.97 | 0.96 | 0.95 | 0.91 | 0.86 | 0.79 | 0.71  | 0.62  | 0.35  | 0.06  |
| Sudan   | G5009     | 1              | 1.00 | 1.00 | 1.00 | 1.00 | 0.99 | 0.99 | 0.99 | 0.98 | 0.97 | 0.96 | 0.91 | 0.85 | 0.77 | 0.70  | 0.62  | 0.42  | 0.26  |
| Sudan   | G5010     | 1              | 1.00 | 1.00 | 1.00 | 1.00 | 0.99 | 0.99 | 0.99 | 0.98 | 0.97 | 0.95 | 0.90 | 0.83 | 0.75 | 0.67  | 0.59  | 0.38  | 0.21  |
| Sudan   | G5013     | 1              | 1.00 | 1.00 | 0.99 | 0.99 | 0.97 | 0.96 | 0.93 | 0.89 | 0.84 | 0.78 | 0.62 | 0.44 | 0.28 | 0.14  | 0.04  | -0.04 | -0.03 |
| Sudan   | G5014     | 1              | 1.00 | 1.00 | 1.00 | 1.00 | 0.99 | 0.99 | 0.99 | 0.98 | 0.97 | 0.96 | 0.94 | 0.91 | 0.87 | 0.80  | 0.57  | 0.27  |       |
| Sudan   | G5015     | 1              | 1.00 | 1.00 | 1.00 | 1.00 | 0.99 | 0.99 | 0.99 | 0.98 | 0.97 | 0.96 | 0.94 | 0.91 | 0.87 | 0.80  | 0.57  | 0.27  |       |
| Sudan   | G5016     | 1              | 1.00 | 1.00 | 0.99 | 0.99 | 0.98 | 0.97 | 0.96 | 0.94 | 0.93 | 0.91 | 0.86 | 0.81 | 0.75 | 0.69  | 0.63  | 0.50  | 0.38  |
| Sudan   | G5019     | 1              | 1.00 | 1.00 | 0.99 | 0.98 | 0.97 | 0.95 | 0.92 | 0.88 | 0.84 | 0.79 | 0.65 | 0.48 | 0.30 | 0.14  | 0.01  | -0.15 | -0.18 |
| Sudan   | G5020     | 1              | 1.00 | 1.00 | 1.00 | 1.00 | 0.99 | 0.99 | 0.99 | 0.99 | 0.98 | 0.98 | 0.97 | 0.94 | 0.91 | 0.85  | 0.77  | 0.45  | 0.10  |
| Sudan   | G5021     | 1              | 1.00 | 1.00 | 1.00 | 1.00 | 0.99 | 0.99 | 0.99 | 0.99 | 0.98 | 0.98 | 0.97 | 0.96 | 0.94 | 0.91  | 0.88  | 0.75  | 0.59  |
| Sudan   | G5035     | 1              | 1.00 | 1.00 | 1.00 | 0.99 | 0.99 | 0.99 | 0.99 | 0.99 | 0.98 | 0.98 | 0.97 | 0.95 | 0.92 | 0.88  | 0.83  | 0.67  | 0.51  |
| Sudan   | G5036     | 1              | 1.00 | 1.00 | 1.00 | 0.99 | 0.99 | 0.99 | 0.99 | 0.98 | 0.98 | 0.98 | 0.96 | 0.94 | 0.91 | 0.87  | 0.82  | 0.66  | 0.50  |
| Sudan   | G5037     | 1              | 1.00 | 1.00 | 1.00 | 1.00 | 0.99 | 0.99 | 0.99 | 0.99 | 0.98 | 0.98 | 0.97 | 0.95 | 0.93 | 0.90  | 0.86  | 0.73  | 0.58  |
| Sudan   | G5041     | 1              | 1.00 | 0.99 | 0.99 | 0.98 | 0.97 | 0.96 | 0.94 | 0.92 | 0.90 | 0.87 | 0.80 | 0.70 | 0.58 | 0.46  | 0.34  | 0.08  | -0.09 |
| Sudan   | G5044     | 1              | 1.00 | 0.99 | 0.98 | 0.96 | 0.93 | 0.86 | 0.77 | 0.67 | 0.57 | 0.48 | 0.32 | 0.19 | 0.07 | -0.02 | -0.10 | -0.15 | -0.17 |
| Sudan   | G5046     | 1              | 0.98 | 0.98 | 0.97 | 0.97 | 0.96 | 0.96 | 0.95 | 0.95 | 0.95 | 0.94 | 0.92 | 0.89 | 0.84 | 0.76  | 0.68  | 0.49  | 0.32  |
| Sudan   | G5051     | 1              | 1.00 | 1.00 | 0.99 | 0.99 | 0.99 | 0.99 | 0.98 | 0.97 | 0.97 | 0.96 | 0.93 | 0.89 | 0.83 | 0.76  | 0.68  | 0.50  | 0.38  |
| Sudan   | G5054     | 1              | 0.99 | 0.99 | 0.98 | 0.98 | 0.97 | 0.97 | 0.97 | 0.96 | 0.95 | 0.94 | 0.91 | 0.87 | 0.82 | 0.76  | 0.70  | 0.56  | 0.46  |
| Sudan   | G5055     | 1              | 1.00 | 1.00 | 1.00 | 0.99 | 0.99 | 0.99 | 0.98 | 0.98 | 0.97 | 0.96 | 0.95 | 0.92 | 0.87 | 0.81  | 0.75  | 0.55  | 0.36  |
| Sudan   | G5061     | 1              | 1.00 | 1.00 | 1.00 | 0.99 | 0.99 | 0.98 | 0.98 | 0.97 | 0.96 | 0.95 | 0.92 | 0.89 | 0.83 | 0.77  | 0.71  | 0.54  | 0.38  |
| Sudan   | G5062     | 1              | 1.00 | 1.00 | 0.99 | 0.99 | 0.98 | 0.98 | 0.97 | 0.97 | 0.96 | 0.96 | 0.93 | 0.88 | 0.81 | 0.72  | 0.62  | 0.37  | 0.17  |

| Country   | GloFAS ID | Station filter | LT1  | LT2  | LT3  | LT4  | LT5  | LT6  | LT7   | LT8   | LT9   | LT10  | LT12  | LT14  | LT16  | LT18  | LT20  | LT25  | L30   |
|-----------|-----------|----------------|------|------|------|------|------|------|-------|-------|-------|-------|-------|-------|-------|-------|-------|-------|-------|
| Sudan     | G5072     | 1              | 1.00 | 1.00 | 0.99 | 0.99 | 0.98 | 0.97 | 0.95  | 0.93  | 0.90  | 0.86  | 0.78  | 0.67  | 0.57  | 0.46  | 0.37  | 0.23  | 0.20  |
| Sudan     | G5073     | 1              | 1.00 | 1.00 | 0.99 | 0.99 | 0.98 | 0.96 | 0.95  | 0.93  | 0.90  | 0.88  | 0.83  | 0.76  | 0.70  | 0.63  | 0.57  | 0.47  | 0.43  |
| Sudan     | G5074     | 1              | 1.00 | 1.00 | 1.00 | 0.99 | 0.99 | 0.98 | 0.98  | 0.97  | 0.96  | 0.95  | 0.92  | 0.87  | 0.81  | 0.74  | 0.67  | 0.47  | 0.29  |
| Sudan     | G5075     | 1              | 1.00 | 1.00 | 1.00 | 0.99 | 0.99 | 0.99 | 0.99  | 0.98  | 0.98  | 0.97  | 0.96  | 0.94  | 0.92  | 0.90  | 0.88  | 0.79  | 0.69  |
| Sudan     | G5077     | 1              | 1.00 | 1.00 | 1.00 | 0.99 | 0.99 | 0.98 | 0.97  | 0.96  | 0.94  | 0.92  | 0.87  | 0.79  | 0.71  | 0.62  | 0.54  | 0.37  | 0.30  |
| Sudan     | G5078     | 1              | 1.00 | 1.00 | 1.00 | 0.99 | 0.99 | 0.98 | 0.97  | 0.96  | 0.94  | 0.91  | 0.85  | 0.77  | 0.68  | 0.59  | 0.52  | 0.43  | 0.41  |
| Sudan     | G5079     | 1              | 1.00 | 0.99 | 0.99 | 0.98 | 0.98 | 0.97 | 0.96  | 0.95  | 0.93  | 0.91  | 0.86  | 0.79  | 0.70  | 0.61  | 0.53  | 0.41  | 0.39  |
| Sudan     | G5080     | 1              | 1.00 | 1.00 | 1.00 | 0.99 | 0.99 | 0.99 | 0.99  | 0.99  | 0.98  | 0.98  | 0.97  | 0.95  | 0.94  | 0.93  | 0.91  | 0.80  | 0.63  |
| Sudan     | G5092     | 1              | 1.00 | 1.00 | 0.99 | 0.98 | 0.97 | 0.96 | 0.95  | 0.93  | 0.91  | 0.88  | 0.80  | 0.70  | 0.59  | 0.49  | 0.39  | 0.15  | -0.05 |
| Sudan     | G5093     | 1              | 1.00 | 1.00 | 1.00 | 0.99 | 0.99 | 0.98 | 0.96  | 0.94  | 0.91  | 0.88  | 0.80  | 0.74  | 0.68  | 0.61  | 0.55  | 0.45  | 0.39  |
| Sudan     | G5095     | 1              | 1.00 | 0.99 | 0.98 | 0.96 | 0.95 | 0.94 | 0.92  | 0.91  | 0.89  | 0.87  | 0.81  | 0.73  | 0.64  | 0.54  | 0.44  | 0.24  | 0.06  |
| Sudan     | G5098     | 1              | 1.00 | 0.99 | 0.98 | 0.97 | 0.96 | 0.95 | 0.93  | 0.90  | 0.85  | 0.79  | 0.66  | 0.54  | 0.42  | 0.31  | 0.21  | -0.01 | -0.19 |
| Sudan     | G5100     | 1              | 0.99 | 0.99 | 0.98 | 0.96 | 0.93 | 0.89 | 0.84  | 0.78  | 0.71  | 0.64  | 0.49  | 0.35  | 0.24  | 0.17  | 0.13  | 0.13  | 0.17  |
| Sudan     | G5106     | 1              | 1.00 | 1.00 | 1.00 | 1.00 | 0.99 | 0.99 | 0.98  | 0.98  | 0.97  | 0.97  | 0.96  | 0.94  | 0.93  | 0.90  | 0.86  | 0.69  | 0.50  |
| Sudan     | G5161     | 1              | 0.99 | 0.94 | 0.88 | 0.82 | 0.76 | 0.71 | 0.65  | 0.59  | 0.54  | 0.49  | 0.40  | 0.30  | 0.21  | 0.12  | 0.03  | -0.19 | -0.41 |
| Sudan     | G5163     | 1              | 1.00 | 1.00 | 1.00 | 1.00 | 0.99 | 0.99 | 0.99  | 0.99  | 0.99  | 0.98  | 0.97  | 0.94  | 0.88  | 0.81  | 0.73  | 0.53  | 0.36  |
| Swaziland | G1443     | 1              | 0.98 | 0.91 | 0.83 | 0.75 | 0.68 | 0.62 | 0.55  | 0.50  | 0.46  | 0.42  | 0.36  | 0.32  | 0.29  | 0.26  | 0.25  | 0.23  | 0.20  |
| Tanzania  | G1216     | 1              | 0.97 | 0.81 | 0.61 | 0.46 | 0.34 | 0.22 | 0.12  | 0.04  | -0.04 | -0.10 | -0.22 | -0.29 | -0.34 | -0.38 | -0.41 | -0.41 | -0.38 |
| Tanzania  | G1892     | 1              | 1.00 | 0.99 | 0.97 | 0.94 | 0.90 | 0.85 | 0.78  | 0.69  | 0.60  | 0.51  | 0.34  | 0.20  | 0.09  | 0.00  | -0.05 | -0.08 | -0.03 |
| Tanzania  | G1893     | 1              | 0.98 | 0.89 | 0.77 | 0.65 | 0.54 | 0.45 | 0.37  | 0.31  | 0.26  | 0.22  | 0.14  | 0.07  | 0.03  | 0.02  | 0.03  | 0.02  | 0.03  |
| Tanzania  | G5347     | 1              | 1.00 | 0.99 | 0.98 | 0.95 | 0.88 | 0.77 | 0.60  | 0.41  | 0.23  | 0.05  | -0.25 | -0.48 | -0.65 | -0.80 | -0.92 | -1.00 | -0.96 |
| Tanzania  | G5428     | 1              | 0.99 | 0.98 | 0.96 | 0.93 | 0.88 | 0.80 | 0.70  | 0.57  | 0.42  | 0.27  | 0.01  | -0.19 | -0.33 | -0.42 | -0.47 | -0.49 | -0.43 |
| Tanzania  | G5432     | 1              | 0.98 | 0.93 | 0.87 | 0.79 | 0.71 | 0.64 | 0.56  | 0.50  | 0.44  | 0.37  | 0.22  | 0.09  | 0.00  | -0.05 | -0.09 | -0.19 | -0.24 |
| Tanzania  | G5445     | 1              | 1.00 | 0.98 | 0.95 | 0.88 | 0.79 | 0.67 | 0.57  | 0.49  | 0.43  | 0.38  | 0.30  | 0.24  | 0.19  | 0.15  | 0.08  | -0.15 | -0.18 |
| Tanzania  | G5446     | 1              | 1.00 | 0.99 | 0.99 | 0.98 | 0.96 | 0.94 | 0.92  | 0.88  | 0.83  | 0.77  | 0.59  | 0.37  | 0.14  | -0.07 | -0.24 | -0.43 | -0.46 |
| Tanzania  | G5450     | 1              | 0.92 | 0.66 | 0.49 | 0.39 | 0.32 | 0.28 | 0.25  | 0.23  | 0.22  | 0.21  | 0.17  | 0.14  | 0.11  | 0.04  | 0.01  | -0.06 | -0.11 |
| Tanzania  | G5456     | 1              | 1.00 | 0.99 | 0.99 | 0.97 | 0.95 | 0.92 | 0.87  | 0.82  | 0.76  | 0.70  | 0.57  | 0.44  | 0.31  | 0.18  | 0.07  | -0.19 | -0.33 |
| Tanzania  | G5457     | 1              | 0.98 | 0.93 | 0.85 | 0.77 | 0.71 | 0.67 | 0.63  | 0.59  | 0.56  | 0.53  | 0.48  | 0.44  | 0.39  | 0.37  | 0.35  | 0.27  | 0.24  |
| Tanzania  | G5461     | 1              | 1.00 | 0.99 | 0.99 | 0.98 | 0.96 | 0.95 | 0.93  | 0.90  | 0.88  | 0.84  | 0.76  | 0.67  | 0.58  | 0.48  | 0.39  | 0.22  | 0.11  |
| Tanzania  | G5510     | 1              | 0.99 | 0.98 | 0.95 | 0.91 | 0.84 | 0.77 | 0.71  | 0.66  | 0.61  | 0.57  | 0.51  | 0.45  | 0.39  | 0.34  | 0.30  | 0.18  | 0.09  |
| Tanzania  | G5512     | 1              | 0.99 | 0.95 | 0.83 | 0.62 | 0.38 | 0.14 | -0.06 | -0.22 | -0.35 | -0.46 | -0.60 | -0.70 | -0.77 | -0.81 | -0.81 | -0.71 | -0.59 |
| Tanzania  | G5524     | 1              | 0.99 | 0.99 | 0.98 | 0.96 | 0.94 | 0.91 | 0.87  | 0.82  | 0.77  | 0.72  | 0.61  | 0.52  | 0.44  | 0.37  | 0.31  | 0.22  | 0.16  |
| Tanzania  | G5528     | 1              | 0.99 | 0.97 | 0.95 | 0.92 | 0.90 | 0.88 | 0.86  | 0.83  | 0.80  | 0.76  | 0.67  | 0.57  | 0.46  | 0.36  | 0.27  | 0.11  | 0.04  |
| Tanzania  | G5532     | 1              | 0.99 | 0.96 | 0.91 | 0.86 | 0.78 | 0.66 | 0.50  | 0.35  | 0.20  | 0.07  | -0.16 | -0.33 | -0.43 | -0.50 | -0.52 | -0.49 | -0.39 |
| Tanzania  | G5533     | 1              | 1.00 | 0.99 | 0.97 | 0.92 | 0.86 | 0.80 | 0.73  | 0.67  | 0.60  | 0.55  | 0.46  | 0.39  | 0.32  | 0.27  | 0.23  | 0.19  | 0.17  |
| Tanzania  | G5545     | 1              | 1.00 | 0.97 | 0.90 | 0.82 | 0.72 | 0.63 | 0.55  | 0.47  | 0.41  | 0.36  | 0.28  | 0.20  | 0.14  | 0.10  | 0.09  | 0.08  | 0.08  |
| Tanzania  | G5547     | 1              | 1.00 | 0.99 | 0.97 | 0.94 | 0.89 | 0.82 | 0.76  | 0.69  | 0.63  | 0.57  | 0.47  | 0.39  | 0.33  | 0.28  | 0.24  | 0.19  | 0.16  |
| Tanzania  | G5602     | 1              | 0.98 | 0.92 | 0.87 | 0.81 | 0.75 | 0.68 | 0.62  | 0.57  | 0.51  | 0.46  | 0.37  | 0.30  | 0.24  | 0.20  | 0.16  | 0.09  | 0.05  |
| Togo      | G1089     | 1              | 0.99 | 0.95 | 0.90 | 0.85 | 0.81 | 0.78 | 0.76  | 0.73  | 0.70  | 0.67  | 0.62  | 0.58  | 0.54  | 0.51  | 0.48  | 0.39  | 0.30  |

| Country        | GloFAS ID | Station filter | LT1  | LT2  | LT3  | LT4  | LT5  | LT6  | LT7  | LT8  | LT9  | LT10 | LT12 | LT14  | LT16  | LT18  | LT20  | LT25  | L30   |
|----------------|-----------|----------------|------|------|------|------|------|------|------|------|------|------|------|-------|-------|-------|-------|-------|-------|
| Togo           | G5067     | 1              | 1.00 | 0.98 | 0.96 | 0.92 | 0.87 | 0.81 | 0.76 | 0.71 | 0.65 | 0.60 | 0.52 | 0.45  | 0.39  | 0.34  | 0.30  | 0.18  | 0.07  |
| Tunisia        | G4233     | 1              | 1.00 | 0.99 | 0.97 | 0.95 | 0.94 | 0.92 | 0.90 | 0.87 | 0.85 | 0.83 | 0.79 | 0.76  | 0.71  | 0.67  | 0.65  | 0.55  | 0.49  |
| Uganda         | G5179     | 1              | 1.00 | 1.00 | 1.00 | 0.99 | 0.99 | 0.99 | 0.99 | 0.99 | 0.98 | 0.98 | 0.97 | 0.97  | 0.95  | 0.94  | 0.93  | 0.88  | 0.82  |
| Uganda         | G5194     | 1              | 1.00 | 1.00 | 1.00 | 1.00 | 1.00 | 0.99 | 0.99 | 0.99 | 0.99 | 0.98 | 0.98 | 0.96  | 0.94  | 0.92  | 0.90  | 0.83  | 0.76  |
| Uganda         | G5195     | 1              | 1.00 | 0.99 | 0.99 | 0.98 | 0.96 | 0.93 | 0.89 | 0.85 | 0.79 | 0.73 | 0.60 | 0.47  | 0.37  | 0.29  | 0.24  | 0.16  | 0.11  |
| Uganda         | G5196     | 1              | 0.99 | 0.97 | 0.95 | 0.93 | 0.92 | 0.90 | 0.86 | 0.82 | 0.78 | 0.73 | 0.65 | 0.58  | 0.51  | 0.45  | 0.41  | 0.30  | 0.24  |
| Uganda         | G5200     | 1              | 0.99 | 0.91 | 0.79 | 0.66 | 0.54 | 0.42 | 0.33 | 0.26 | 0.19 | 0.14 | 0.05 | -0.03 | -0.10 | -0.19 | -0.31 | -0.53 | -0.70 |
| Uganda         | G5230     | 1              | 1.00 | 0.99 | 0.96 | 0.92 | 0.88 | 0.83 | 0.79 | 0.75 | 0.71 | 0.67 | 0.59 | 0.52  | 0.46  | 0.41  | 0.35  | 0.26  | 0.17  |
| Uganda         | G6106     | 1              | 0.99 | 0.94 | 0.86 | 0.75 | 0.64 | 0.56 | 0.49 | 0.43 | 0.38 | 0.34 | 0.25 | 0.20  | 0.13  | 0.09  | 0.05  | -0.02 | -0.07 |
| Western Sahara | G4476     | 1              | 1.00 | 1.00 | 1.00 | 0.96 | 0.86 | 0.82 | 0.85 | 0.82 | 0.72 | 0.68 | 0.57 | 0.60  | 0.53  | 0.53  | 0.46  | 0.44  | 0.36  |
| Western Sahara | G4484     | 1              | 1.00 | 1.00 | 1.00 | 0.98 | 0.95 | 0.93 | 0.92 | 0.90 | 0.88 | 0.85 | 0.81 | 0.73  | 0.65  | 0.62  | 0.61  | 0.48  | 0.36  |
| Western Sahara | G4485     | 1              | 1.00 | 1.00 | 1.00 | 1.00 | 0.99 | 0.97 | 0.96 | 0.96 | 0.94 | 0.86 | 0.82 | 0.66  | 0.63  | 0.51  | 0.52  | 0.34  | 0.27  |
| Western Sahara | G4486     | 1              | 1.00 | 1.00 | 0.99 | 0.95 | 0.89 | 0.87 | 0.88 | 0.84 | 0.75 | 0.71 | 0.60 | 0.60  | 0.49  | 0.48  | 0.44  | 0.36  | 0.28  |
| Zambia         | G1264     | 1              | 0.99 | 0.96 | 0.90 | 0.84 | 0.78 | 0.72 | 0.67 | 0.62 | 0.59 | 0.56 | 0.50 | 0.45  | 0.40  | 0.35  | 0.32  | 0.24  | 0.17  |
| Zambia         | G1265     | 1              | 0.98 | 0.89 | 0.77 | 0.65 | 0.56 | 0.51 | 0.47 | 0.43 | 0.41 | 0.39 | 0.34 | 0.32  | 0.28  | 0.24  | 0.19  | 0.09  | 0.02  |
| Zambia         | G1269     | 1              | 0.69 | 0.58 | 0.51 | 0.47 | 0.46 | 0.44 | 0.42 | 0.39 | 0.38 | 0.35 | 0.34 | 0.33  | 0.31  | 0.30  | 0.28  | 0.21  | 0.18  |
| Zambia         | G1271     | 1              | 0.98 | 0.91 | 0.82 | 0.74 | 0.66 | 0.59 | 0.55 | 0.51 | 0.47 | 0.44 | 0.40 | 0.36  | 0.33  | 0.31  | 0.28  | 0.19  | 0.15  |
| Zambia         | G1279     | 1              | 1.00 | 0.99 | 0.99 | 0.98 | 0.96 | 0.94 | 0.91 | 0.87 | 0.82 | 0.78 | 0.68 | 0.59  | 0.52  | 0.46  | 0.42  | 0.37  | 0.30  |
| Zambia         | G1294     | 1              | 1.00 | 0.98 | 0.95 | 0.92 | 0.89 | 0.85 | 0.81 | 0.78 | 0.74 | 0.70 | 0.63 | 0.55  | 0.48  | 0.42  | 0.36  | 0.28  | 0.22  |
| Zambia         | G1299     | 0              | 0.96 | 0.89 | 0.81 | 0.74 | 0.68 | 0.62 | 0.56 | 0.50 | 0.45 | 0.40 | 0.32 | 0.25  | 0.18  | 0.12  | 0.07  | 0.00  | -0.03 |
| Zambia         | G1310     | 0              | 0.71 | 0.53 | 0.45 | 0.37 | 0.31 | 0.29 | 0.24 | 0.19 | 0.19 | 0.18 | 0.15 | 0.10  | 0.12  | 0.14  | 0.12  | 0.05  | 0.07  |
| Zambia         | G1312     | 1              | 1.00 | 0.98 | 0.97 | 0.94 | 0.92 | 0.89 | 0.87 | 0.84 | 0.81 | 0.78 | 0.73 | 0.67  | 0.62  | 0.57  | 0.51  | 0.37  | 0.25  |
| Zambia         | G1314     | 1              | 0.99 | 0.98 | 0.95 | 0.92 | 0.89 | 0.86 | 0.83 | 0.80 | 0.77 | 0.74 | 0.68 | 0.62  | 0.57  | 0.52  | 0.47  | 0.36  | 0.24  |
| Zambia         | G1315     | 0              | 0.94 | 0.87 | 0.81 | 0.76 | 0.73 | 0.68 | 0.65 | 0.63 | 0.59 | 0.56 | 0.51 | 0.45  | 0.41  | 0.34  | 0.27  | 0.12  | 0.04  |
| Zambia         | G1319     | 1              | 1.00 | 1.00 | 0.99 | 0.98 | 0.95 | 0.92 | 0.89 | 0.84 | 0.79 | 0.74 | 0.66 | 0.59  | 0.53  | 0.48  | 0.45  | 0.36  | 0.28  |
| Zambia         | G1320     | 1              | 0.99 | 0.98 | 0.96 | 0.94 | 0.91 | 0.88 | 0.85 | 0.82 | 0.79 | 0.76 | 0.69 | 0.64  | 0.58  | 0.53  | 0.49  | 0.37  | 0.26  |
| Zambia         | G1321     | 1              | 0.99 | 0.98 | 0.96 | 0.94 | 0.91 | 0.88 | 0.85 | 0.82 | 0.79 | 0.76 | 0.69 | 0.64  | 0.58  | 0.53  | 0.49  | 0.37  | 0.26  |
| Zambia         | G1323     | 1              | 0.99 | 0.96 | 0.92 | 0.87 | 0.82 | 0.77 | 0.72 | 0.68 | 0.63 | 0.59 | 0.52 | 0.45  | 0.39  | 0.34  | 0.29  | 0.19  | 0.11  |
| Zambia         | G1328     | 1              | 1.00 | 1.00 | 1.00 | 0.99 | 0.99 | 0.99 | 0.98 | 0.97 | 0.96 | 0.95 | 0.92 | 0.88  | 0.83  | 0.78  | 0.73  | 0.61  | 0.52  |
| Zambia         | G1329     | 1              | 1.00 | 0.99 | 0.98 | 0.97 | 0.95 | 0.94 | 0.91 | 0.89 | 0.86 | 0.82 | 0.75 | 0.68  | 0.61  | 0.54  | 0.49  | 0.38  | 0.29  |
| Zambia         | G1331     | 1              | 1.00 | 0.99 | 0.98 | 0.97 | 0.96 | 0.94 | 0.93 | 0.91 | 0.88 | 0.86 | 0.80 | 0.73  | 0.67  | 0.60  | 0.54  | 0.43  | 0.33  |
| Zambia         | G1338     | 1              | 1.00 | 1.00 | 0.99 | 0.99 | 0.98 | 0.97 | 0.96 | 0.94 | 0.92 | 0.90 | 0.84 | 0.78  | 0.72  | 0.65  | 0.59  | 0.45  | 0.35  |
| Zambia         | G1339     | 1              | 1.00 | 1.00 | 0.99 | 0.99 | 0.98 | 0.98 | 0.97 | 0.96 | 0.94 | 0.93 | 0.89 | 0.85  | 0.80  | 0.76  | 0.71  | 0.60  | 0.51  |
| Zambia         | G1340     | 1              | 0.99 | 0.95 | 0.90 | 0.85 | 0.80 | 0.74 | 0.69 | 0.63 | 0.58 | 0.53 | 0.43 | 0.35  | 0.28  | 0.24  | 0.20  | 0.12  | 0.06  |
| Zambia         | G1343     | 0              | 0.94 | 0.84 | 0.76 | 0.71 | 0.66 | 0.63 | 0.61 | 0.59 | 0.57 | 0.54 | 0.49 | 0.45  | 0.44  | 0.42  | 0.39  | 0.37  | 0.35  |
| Zambia         | G1344     | 1              | 0.94 | 0.83 | 0.72 | 0.63 | 0.55 | 0.49 | 0.45 | 0.39 | 0.35 | 0.32 | 0.23 | 0.16  | 0.12  | 0.10  | 0.08  | 0.04  | 0.02  |
| Zambia         | G1351     | 1              | 0.98 | 0.95 | 0.93 | 0.91 | 0.90 | 0.88 | 0.87 | 0.85 | 0.84 | 0.82 | 0.79 | 0.75  | 0.72  | 0.69  | 0.67  | 0.61  | 0.55  |
| Zambia         | G1352     | 1              | 1.00 | 0.99 | 0.99 | 0.99 | 0.98 | 0.98 | 0.97 | 0.96 | 0.95 | 0.95 | 0.93 | 0.90  | 0.87  | 0.84  | 0.81  | 0.74  | 0.67  |
| Zambia         | G1353     | 1              | 1.00 | 1.00 | 1.00 | 0.99 | 0.98 | 0.97 | 0.95 | 0.94 | 0.92 | 0.91 | 0.88 | 0.84  | 0.81  | 0.77  | 0.74  | 0.66  | 0.60  |

| Country  | GloFAS ID | Station filter | LT1  | LT2  | LT3  | LT4  | LT5  | LT6  | LT7  | LT8  | LT9  | LT10 | LT12 | LT14 | LT16 | LT18 | LT20 | LT25 | L30  |
|----------|-----------|----------------|------|------|------|------|------|------|------|------|------|------|------|------|------|------|------|------|------|
| Zambia   | G1361     | 1              | 1.00 | 1.00 | 1.00 | 0.99 | 0.99 | 0.99 | 0.99 | 0.99 | 0.98 | 0.98 | 0.97 | 0.96 | 0.94 | 0.91 | 0.88 | 0.77 | 0.66 |
| Zambia   | G1735     | 1              | 0.99 | 0.97 | 0.94 | 0.90 | 0.86 | 0.83 | 0.79 | 0.76 | 0.73 | 0.69 | 0.60 | 0.52 | 0.46 | 0.41 | 0.38 | 0.32 | 0.27 |
| Zambia   | G1783     | 1              | 0.99 | 0.97 | 0.92 | 0.87 | 0.82 | 0.76 | 0.71 | 0.66 | 0.60 | 0.55 | 0.45 | 0.37 | 0.29 | 0.25 | 0.21 | 0.13 | 0.06 |
| Zambia   | G1791     | 1              | 1.00 | 1.00 | 1.00 | 0.99 | 0.99 | 0.98 | 0.98 | 0.98 | 0.97 | 0.97 | 0.95 | 0.94 | 0.92 | 0.90 | 0.87 | 0.77 | 0.66 |
| Zambia   | G1792     | 1              | 1.00 | 1.00 | 0.99 | 0.99 | 0.99 | 0.99 | 0.99 | 0.98 | 0.98 | 0.97 | 0.96 | 0.94 | 0.91 | 0.87 | 0.82 | 0.70 | 0.59 |
| Zambia   | G5604     | 1              | 1.00 | 0.99 | 0.98 | 0.97 | 0.94 | 0.92 | 0.88 | 0.85 | 0.81 | 0.78 | 0.71 | 0.64 | 0.56 | 0.50 | 0.44 | 0.32 | 0.25 |
| Zambia   | G5607     | 1              | 0.99 | 0.99 | 0.98 | 0.97 | 0.96 | 0.95 | 0.94 | 0.93 | 0.92 | 0.91 | 0.89 | 0.87 | 0.85 | 0.84 | 0.83 | 0.80 | 0.77 |
| Zambia   | G5608     | 1              | 0.99 | 0.98 | 0.97 | 0.96 | 0.94 | 0.93 | 0.92 | 0.90 | 0.89 | 0.88 | 0.85 | 0.83 | 0.81 | 0.79 | 0.77 | 0.73 | 0.70 |
| Zambia   | G5649     | 1              | 1.00 | 1.00 | 1.00 | 0.99 | 0.98 | 0.97 | 0.95 | 0.93 | 0.90 | 0.86 | 0.78 | 0.69 | 0.62 | 0.56 | 0.51 | 0.42 | 0.33 |
| Zambia   | G5651     | 1              | 1.00 | 0.99 | 0.98 | 0.96 | 0.92 | 0.89 | 0.84 | 0.80 | 0.75 | 0.71 | 0.64 | 0.57 | 0.51 | 0.47 | 0.43 | 0.34 | 0.27 |
| Zambia   | G5652     | 1              | 1.00 | 1.00 | 1.00 | 1.00 | 0.99 | 0.99 | 0.99 | 0.98 | 0.97 | 0.96 | 0.94 | 0.90 | 0.86 | 0.81 | 0.75 | 0.61 | 0.52 |
| Zambia   | G5653     | 1              | 1.00 | 0.98 | 0.97 | 0.95 | 0.93 | 0.91 | 0.88 | 0.85 | 0.82 | 0.79 | 0.72 | 0.65 | 0.59 | 0.54 | 0.49 | 0.38 | 0.27 |
| Zambia   | G5655     | 1              | 1.00 | 0.99 | 0.97 | 0.94 | 0.90 | 0.86 | 0.81 | 0.77 | 0.72 | 0.68 | 0.59 | 0.52 | 0.45 | 0.39 | 0.34 | 0.25 | 0.16 |
| Zambia   | G5656     | 1              | 1.00 | 0.99 | 0.98 | 0.97 | 0.94 | 0.91 | 0.86 | 0.82 | 0.77 | 0.72 | 0.63 | 0.55 | 0.46 | 0.39 | 0.33 | 0.25 | 0.20 |
| Zambia   | G5657     | 1              | 0.93 | 0.81 | 0.71 | 0.63 | 0.57 | 0.51 | 0.46 | 0.42 | 0.38 | 0.33 | 0.26 | 0.21 | 0.19 | 0.14 | 0.13 | 0.09 | 0.06 |
| Zambia   | G5658     | 1              | 0.97 | 0.91 | 0.82 | 0.75 | 0.66 | 0.60 | 0.56 | 0.51 | 0.47 | 0.44 | 0.36 | 0.30 | 0.25 | 0.24 | 0.21 | 0.17 | 0.13 |
| Zambia   | G5660     | 1              | 1.00 | 1.00 | 1.00 | 0.99 | 0.99 | 0.98 | 0.97 | 0.95 | 0.94 | 0.92 | 0.87 | 0.82 | 0.77 | 0.71 | 0.66 | 0.55 | 0.47 |
| Zambia   | G5661     | 1              | 0.98 | 0.91 | 0.83 | 0.75 | 0.68 | 0.61 | 0.56 | 0.52 | 0.47 | 0.43 | 0.35 | 0.29 | 0.24 | 0.21 | 0.18 | 0.13 | 0.09 |
| Zambia   | G5662     | 1              | 0.99 | 0.97 | 0.94 | 0.89 | 0.85 | 0.80 | 0.75 | 0.70 | 0.65 | 0.59 | 0.50 | 0.42 | 0.34 | 0.29 | 0.25 | 0.14 | 0.07 |
| Zambia   | G5664     | 1              | 1.00 | 0.99 | 0.99 | 0.98 | 0.96 | 0.95 | 0.93 | 0.91 | 0.88 | 0.86 | 0.81 | 0.76 | 0.71 | 0.67 | 0.62 | 0.53 | 0.46 |
| Zambia   | G5665     | 1              | 1.00 | 1.00 | 1.00 | 1.00 | 1.00 | 0.99 | 0.99 | 0.99 | 0.98 | 0.98 | 0.96 | 0.93 | 0.90 | 0.86 | 0.81 | 0.68 | 0.58 |
| Zambia   | G5676     | 1              | 0.99 | 0.97 | 0.93 | 0.88 | 0.83 | 0.77 | 0.72 | 0.66 | 0.61 | 0.56 | 0.46 | 0.37 | 0.30 | 0.25 | 0.21 | 0.13 | 0.07 |
| Zambia   | G5683     | 1              | 1.00 | 0.99 | 0.99 | 0.99 | 0.99 | 0.98 | 0.98 | 0.98 | 0.97 | 0.97 | 0.96 | 0.95 | 0.94 | 0.93 | 0.92 | 0.89 | 0.86 |
| Zambia   | G5696     | 1              | 1.00 | 0.98 | 0.95 | 0.91 | 0.84 | 0.77 | 0.70 | 0.63 | 0.56 | 0.50 | 0.41 | 0.34 | 0.30 | 0.27 | 0.24 | 0.23 | 0.22 |
| Zambia   | G5727     | 1              | 0.99 | 0.97 | 0.93 | 0.87 | 0.81 | 0.76 | 0.70 | 0.65 | 0.61 | 0.56 | 0.48 | 0.42 | 0.37 | 0.34 | 0.32 | 0.27 | 0.22 |
| Zimbabwe | G1374     | 1              | 0.99 | 0.97 | 0.93 | 0.88 | 0.83 | 0.79 | 0.75 | 0.72 | 0.68 | 0.63 | 0.55 | 0.46 | 0.39 | 0.34 | 0.30 | 0.21 | 0.17 |
| Zimbabwe | G1389     | 1              | 1.00 | 0.99 | 0.96 | 0.94 | 0.92 | 0.89 | 0.85 | 0.81 | 0.79 | 0.76 | 0.69 | 0.63 | 0.58 | 0.52 | 0.48 | 0.39 | 0.32 |
| Zimbabwe | G1392     | 1              | 0.86 | 0.70 | 0.60 | 0.56 | 0.53 | 0.49 | 0.44 | 0.40 | 0.37 | 0.32 | 0.26 | 0.21 | 0.17 | 0.16 | 0.14 | 0.11 | 0.08 |
| Zimbabwe | G1415     | 1              | 0.98 | 0.96 | 0.92 | 0.85 | 0.81 | 0.78 | 0.70 | 0.62 | 0.57 | 0.53 | 0.40 | 0.31 | 0.24 | 0.22 | 0.19 | 0.14 | 0.10 |
| Zimbabwe | G5687     | 1              | 1.00 | 1.00 | 0.99 | 0.99 | 0.99 | 0.99 | 0.98 | 0.98 | 0.98 | 0.97 | 0.96 | 0.95 | 0.95 | 0.94 | 0.93 | 0.92 | 0.90 |
| Zimbabwe | G5732     | 1              | 0.99 | 0.97 | 0.94 | 0.89 | 0.84 | 0.80 | 0.77 | 0.73 | 0.69 | 0.65 | 0.55 | 0.46 | 0.39 | 0.35 | 0.30 | 0.22 | 0.17 |
| Zimbabwe | G5748     | 1              | 1.00 | 1.00 | 0.99 | 0.99 | 0.98 | 0.98 | 0.97 | 0.96 | 0.95 | 0.94 | 0.91 | 0.88 | 0.86 | 0.84 | 0.81 | 0.77 | 0.71 |
| Zimbabwe | G5751     | 1              | 0.99 | 0.98 | 0.96 | 0.94 | 0.91 | 0.88 | 0.85 | 0.80 | 0.77 | 0.74 | 0.68 | 0.62 | 0.56 | 0.52 | 0.47 | 0.39 | 0.31 |
| Zimbabwe | G5847     | 1              | 0.99 | 0.92 | 0.82 | 0.73 | 0.68 | 0.64 | 0.60 | 0.56 | 0.52 | 0.47 | 0.38 | 0.34 | 0.28 | 0.24 | 0.21 | 0.14 | 0.12 |
| Zimbabwe | G5848     | 1              | 1.00 | 0.98 | 0.94 | 0.88 | 0.82 | 0.79 | 0.75 | 0.70 | 0.65 | 0.61 | 0.51 | 0.47 | 0.40 | 0.36 | 0.32 | 0.23 | 0.20 |
| Zimbabwe | G5854     | 1              | 0.96 | 0.87 | 0.75 | 0.68 | 0.64 | 0.58 | 0.50 | 0.46 | 0.41 | 0.34 | 0.26 | 0.21 | 0.19 | 0.18 | 0.17 | 0.12 | 0.12 |

Table 2: GloFAS climatology skill scores for Asia.

| Country     | GloFAS ID | Station filter | LT1  | LT2  | LT3  | LT4  | LT5   | LT6   | LT7   | LT8   | LT9   | LT10  | LT12  | LT14  | LT16  | LT18  | LT20  | LT25  | L30   |
|-------------|-----------|----------------|------|------|------|------|-------|-------|-------|-------|-------|-------|-------|-------|-------|-------|-------|-------|-------|
| Afghanistan | G1802     | 1              | 0.96 | 0.81 | 0.62 | 0.48 | 0.42  | 0.35  | 0.32  | 0.29  | 0.25  | 0.21  | 0.13  | 0.03  | -0.04 | -0.11 | -0.13 | -0.17 | -0.23 |
| Afghanistan | G4085     | 1              | 0.96 | 0.84 | 0.69 | 0.58 | 0.49  | 0.42  | 0.35  | 0.29  | 0.23  | 0.18  | 0.07  | -0.02 | -0.11 | -0.29 | -0.44 | -0.60 | -0.63 |
| Afghanistan | G4092     | 1              | 0.95 | 0.83 | 0.68 | 0.56 | 0.47  | 0.40  | 0.34  | 0.28  | 0.22  | 0.16  | 0.05  | -0.04 | -0.12 | -0.20 | -0.32 | -0.51 | -0.56 |
| Afghanistan | G4094     | 1              | 1.00 | 0.99 | 0.98 | 0.96 | 0.92  | 0.87  | 0.80  | 0.73  | 0.67  | 0.60  | 0.49  | 0.38  | 0.27  | 0.17  | 0.05  | -0.28 | -0.38 |
| Afghanistan | G4100     | 1              | 1.00 | 0.99 | 0.96 | 0.87 | 0.74  | 0.61  | 0.51  | 0.41  | 0.32  | 0.25  | 0.14  | 0.06  | 0.00  | -0.04 | 0.00  | 0.14  | 0.15  |
| Afghanistan | G4102     | 1              | 0.99 | 0.95 | 0.88 | 0.79 | 0.69  | 0.61  | 0.55  | 0.48  | 0.42  | 0.36  | 0.24  | 0.12  | 0.03  | -0.08 | -0.25 | -0.50 | -0.56 |
| Afghanistan | G4112     | 1              | 1.00 | 0.99 | 0.96 | 0.90 | 0.82  | 0.73  | 0.64  | 0.56  | 0.49  | 0.43  | 0.31  | 0.20  | 0.09  | -0.02 | -0.21 | -0.51 | -0.59 |
| Afghanistan | G4113     | 1              | 0.98 | 0.83 | 0.59 | 0.40 | 0.29  | 0.22  | 0.18  | 0.12  | 0.09  | 0.07  | 0.00  | -0.08 | -0.16 | -0.48 | -0.63 | -0.60 | -0.60 |
| Afghanistan | G4115     | 1              | 1.00 | 0.97 | 0.88 | 0.75 | 0.63  | 0.52  | 0.43  | 0.36  | 0.31  | 0.28  | 0.24  | 0.19  | 0.14  | 0.14  | 0.18  | 0.18  | 0.17  |
| Afghanistan | G4116     | 1              | 0.97 | 0.79 | 0.57 | 0.45 | 0.39  | 0.35  | 0.31  | 0.28  | 0.26  | 0.24  | 0.20  | 0.16  | 0.12  | 0.10  | 0.06  | 0.09  | 0.11  |
| Afghanistan | G4121     | 1              | 0.98 | 0.86 | 0.66 | 0.47 | 0.34  | 0.23  | 0.16  | 0.13  | 0.12  | 0.10  | 0.07  | 0.01  | 0.01  | 0.06  | 0.09  | 0.10  | 0.10  |
| Afghanistan | G4181     | 1              | 0.86 | 0.47 | 0.18 | 0.00 | -0.11 | -0.19 | -0.24 | -0.28 | -0.31 | -0.34 | -0.36 | -0.36 | -0.36 | -0.19 | -0.11 | -0.12 | -0.09 |
| Afghanistan | G4196     | 1              | 0.98 | 0.90 | 0.78 | 0.65 | 0.55  | 0.47  | 0.40  | 0.34  | 0.30  | 0.27  | 0.22  | 0.19  | 0.18  | 0.23  | 0.27  | 0.27  | 0.30  |
| Afghanistan | G4201     | 1              | 0.88 | 0.62 | 0.38 | 0.21 | 0.10  | 0.02  | -0.03 | -0.08 | -0.12 | -0.16 | -0.21 | -0.24 | -0.22 | -0.06 | 0.02  | 0.02  | 0.04  |
| Afghanistan | G4202     | 1              | 0.94 | 0.68 | 0.36 | 0.16 | 0.05  | -0.03 | -0.11 | -0.17 | -0.23 | -0.27 | -0.35 | -0.45 | -0.54 | -0.64 | -0.64 | -0.67 | -0.74 |
| Afghanistan | G4250     | 1              | 0.96 | 0.84 | 0.73 | 0.65 | 0.59  | 0.54  | 0.50  | 0.45  | 0.42  | 0.39  | 0.36  | 0.33  | 0.31  | 0.31  | 0.34  | 0.35  | 0.36  |
| Afghanistan | G4251     | 1              | 0.95 | 0.76 | 0.57 | 0.42 | 0.31  | 0.23  | 0.16  | 0.12  | 0.08  | 0.05  | 0.02  | -0.01 | -0.02 | 0.02  | 0.07  | 0.11  | 0.14  |
| Afghanistan | G4282     | 1              | 1.00 | 0.99 | 0.96 | 0.91 | 0.84  | 0.75  | 0.68  | 0.61  | 0.55  | 0.50  | 0.42  | 0.32  | 0.27  | 0.24  | 0.20  | 0.23  | 0.25  |
| Afghanistan | G4299     | 1              | 1.00 | 0.98 | 0.93 | 0.85 | 0.78  | 0.74  | 0.71  | 0.69  | 0.67  | 0.65  | 0.62  | 0.59  | 0.56  | 0.55  | 0.52  | 0.50  | 0.47  |
| Afghanistan | G4300     | 1              | 1.00 | 0.99 | 0.97 | 0.92 | 0.85  | 0.79  | 0.74  | 0.69  | 0.65  | 0.61  | 0.54  | 0.47  | 0.43  | 0.41  | 0.39  | 0.43  | 0.44  |
| Afghanistan | G4301     | 1              | 0.99 | 0.94 | 0.84 | 0.72 | 0.62  | 0.54  | 0.47  | 0.42  | 0.37  | 0.32  | 0.26  | 0.21  | 0.19  | 0.19  | 0.23  | 0.35  | 0.36  |
| Afghanistan | G4303     | 1              | 1.00 | 0.99 | 0.97 | 0.93 | 0.89  | 0.87  | 0.84  | 0.80  | 0.78  | 0.75  | 0.69  | 0.64  | 0.60  | 0.57  | 0.54  | 0.51  | 0.50  |
| Afghanistan | G4310     | 1              | 1.00 | 1.00 | 1.00 | 0.99 | 0.98  | 0.96  | 0.94  | 0.91  | 0.88  | 0.85  | 0.81  | 0.78  | 0.73  | 0.66  | 0.62  | 0.60  | 0.53  |
| Afghanistan | G4334     | 1              | 1.00 | 1.00 | 1.00 | 1.00 | 0.99  | 0.99  | 0.99  | 0.98  | 0.96  | 0.94  | 0.89  | 0.83  | 0.77  | 0.71  | 0.66  | 0.56  | 0.52  |
| Afghanistan | G4335     | 1              | 1.00 | 1.00 | 0.99 | 0.98 | 0.96  | 0.92  | 0.87  | 0.82  | 0.75  | 0.70  | 0.61  | 0.53  | 0.45  | 0.38  | 0.33  | 0.29  | 0.29  |
| Azerbaijan  | G0728     | 1              | 1.00 | 0.95 | 0.84 | 0.72 | 0.62  | 0.55  | 0.48  | 0.43  | 0.39  | 0.36  | 0.31  | 0.26  | 0.20  | 0.22  | 0.30  | 0.32  | 0.28  |
| Azerbaijan  | G3921     | 1              | 0.96 | 0.84 | 0.68 | 0.53 | 0.39  | 0.27  | 0.17  | 0.08  | 0.01  | -0.04 | -0.13 | -0.18 | -0.22 | -0.18 | -0.12 | -0.08 | -0.08 |
| Azerbaijan  | G4015     | 1              | 0.92 | 0.73 | 0.60 | 0.51 | 0.43  | 0.35  | 0.29  | 0.25  | 0.20  | 0.16  | 0.08  | -0.02 | -0.07 | 0.00  | 0.00  | -0.04 | -0.09 |
| Bangladesh  | G0927     | 1              | 0.98 | 0.90 | 0.74 | 0.59 | 0.51  | 0.43  | 0.36  | 0.33  | 0.28  | 0.22  | 0.16  | 0.12  | 0.06  | 0.02  | -0.05 | -0.20 | -0.32 |
| Bangladesh  | G0928     | 1              | 1.00 | 0.98 | 0.95 | 0.91 | 0.87  | 0.82  | 0.76  | 0.70  | 0.65  | 0.59  | 0.47  | 0.37  | 0.27  | 0.19  | 0.12  | 0.01  | -0.06 |
| Bangladesh  | G0930     | 1              | 1.00 | 1.00 | 0.99 | 0.98 | 0.96  | 0.93  | 0.90  | 0.85  | 0.81  | 0.76  | 0.69  | 0.61  | 0.54  | 0.46  | 0.39  | 0.26  | 0.18  |
| Bangladesh  | G1709     | 1              | 1.00 | 0.97 | 0.94 | 0.90 | 0.85  | 0.80  | 0.74  | 0.68  | 0.62  | 0.56  | 0.44  | 0.35  | 0.25  | 0.17  | 0.10  | 0.01  | -0.06 |
| Bangladesh  | G4523     | 1              | 0.93 | 0.77 | 0.62 | 0.51 | 0.44  | 0.38  | 0.32  | 0.30  | 0.24  | 0.19  | 0.16  | 0.10  | 0.03  | -0.01 | 0.00  | -0.04 | -0.08 |
| Bangladesh  | G4534     | 1              | 0.96 | 0.83 | 0.68 | 0.55 | 0.43  | 0.35  | 0.28  | 0.23  | 0.17  | 0.11  | 0.07  | 0.02  | -0.06 | -0.09 | -0.10 | -0.13 | -0.19 |
| Bangladesh  | G4556     | 1              | 0.99 | 0.93 | 0.79 | 0.64 | 0.55  | 0.47  | 0.39  | 0.35  | 0.31  | 0.25  | 0.18  | 0.13  | 0.07  | 0.03  | -0.02 | -0.18 | -0.30 |
| Bangladesh  | G4591     | 1              | 0.98 | 0.94 | 0.90 | 0.83 | 0.76  | 0.71  | 0.67  | 0.63  | 0.57  | 0.55  | 0.49  | 0.43  | 0.37  | 0.35  | 0.31  | 0.24  | 0.18  |
| Bangladesh  | G4592     | 1              | 1.00 | 0.99 | 0.97 | 0.94 | 0.90  | 0.86  | 0.81  | 0.75  | 0.69  | 0.64  | 0.52  | 0.41  | 0.31  | 0.23  | 0.15  | 0.03  | -0.05 |
| Bangladesh  | G4593     | 1              | 0.99 | 0.96 | 0.91 | 0.83 | 0.75  | 0.67  | 0.60  | 0.54  | 0.48  | 0.43  | 0.35  | 0.29  | 0.23  | 0.19  | 0.15  | 0.11  | 0.07  |

| Country    | GloFAS ID | Station filter | LT1  | LT2  | LT3  | LT4  | LT5  | LT6  | LT7  | LT8  | LT9   | LT10  | LT12  | LT14  | LT16  | LT18  | LT20  | LT25  | L30   |
|------------|-----------|----------------|------|------|------|------|------|------|------|------|-------|-------|-------|-------|-------|-------|-------|-------|-------|
| Bangladesh | G4599     | 1              | 1.00 | 0.99 | 0.97 | 0.95 | 0.91 | 0.87 | 0.82 | 0.77 | 0.71  | 0.65  | 0.54  | 0.43  | 0.33  | 0.24  | 0.17  | 0.04  | -0.04 |
| Bangladesh | G4601     | 1              | 1.00 | 1.00 | 0.99 | 0.99 | 0.97 | 0.95 | 0.92 | 0.88 | 0.84  | 0.80  | 0.72  | 0.65  | 0.57  | 0.50  | 0.43  | 0.29  | 0.20  |
| Bangladesh | G4604     | 1              | 1.00 | 0.99 | 0.96 | 0.92 | 0.85 | 0.78 | 0.70 | 0.63 | 0.57  | 0.51  | 0.42  | 0.34  | 0.28  | 0.23  | 0.19  | 0.12  | 0.09  |
| Bangladesh | G4606     | 1              | 0.98 | 0.93 | 0.87 | 0.81 | 0.76 | 0.70 | 0.65 | 0.61 | 0.58  | 0.54  | 0.48  | 0.41  | 0.36  | 0.31  | 0.26  | 0.18  | 0.11  |
| Bangladesh | G4615     | 1              | 1.00 | 0.99 | 0.97 | 0.94 | 0.89 | 0.83 | 0.77 | 0.70 | 0.64  | 0.58  | 0.48  | 0.40  | 0.33  | 0.27  | 0.22  | 0.14  | 0.09  |
| Cambodia   | G1006     | 1              | 1.00 | 0.99 | 0.98 | 0.96 | 0.93 | 0.90 | 0.87 | 0.83 | 0.79  | 0.75  | 0.65  | 0.55  | 0.45  | 0.34  | 0.24  | 0.07  | -0.03 |
| Cambodia   | G1719     | 1              | 1.00 | 1.00 | 0.99 | 0.99 | 0.98 | 0.96 | 0.94 | 0.92 | 0.89  | 0.86  | 0.79  | 0.71  | 0.61  | 0.52  | 0.41  | 0.18  | 0.05  |
| Cambodia   | G1778     | 1              | 1.00 | 0.99 | 0.97 | 0.94 | 0.91 | 0.88 | 0.84 | 0.80 | 0.75  | 0.71  | 0.62  | 0.54  | 0.46  | 0.40  | 0.34  | 0.23  | 0.16  |
| Cambodia   | G4907     | 1              | 0.99 | 0.96 | 0.91 | 0.85 | 0.78 | 0.72 | 0.65 | 0.58 | 0.52  | 0.47  | 0.38  | 0.30  | 0.24  | 0.17  | 0.13  | 0.08  | 0.06  |
| Cambodia   | G4911     | 1              | 0.99 | 0.98 | 0.96 | 0.91 | 0.85 | 0.80 | 0.76 | 0.71 | 0.67  | 0.63  | 0.54  | 0.48  | 0.41  | 0.36  | 0.30  | 0.23  | 0.18  |
| Cambodia   | G4914     | 1              | 1.00 | 0.99 | 0.96 | 0.92 | 0.88 | 0.83 | 0.78 | 0.73 | 0.69  | 0.64  | 0.57  | 0.50  | 0.44  | 0.38  | 0.32  | 0.26  | 0.22  |
| Cambodia   | G4916     | 1              | 0.99 | 0.96 | 0.88 | 0.78 | 0.68 | 0.59 | 0.50 | 0.43 | 0.37  | 0.30  | 0.21  | 0.14  | 0.11  | 0.06  | 0.04  | 0.03  | 0.03  |
| Cambodia   | G4929     | 1              | 1.00 | 0.99 | 0.97 | 0.94 | 0.89 | 0.84 | 0.77 | 0.71 | 0.65  | 0.59  | 0.48  | 0.38  | 0.30  | 0.25  | 0.20  | 0.11  | 0.06  |
| Cambodia   | G4936     | 1              | 1.00 | 0.98 | 0.96 | 0.93 | 0.89 | 0.85 | 0.81 | 0.76 | 0.71  | 0.66  | 0.57  | 0.48  | 0.40  | 0.33  | 0.28  | 0.19  | 0.12  |
| Cambodia   | G4937     | 1              | 0.99 | 0.97 | 0.93 | 0.88 | 0.84 | 0.79 | 0.74 | 0.70 | 0.66  | 0.62  | 0.55  | 0.49  | 0.43  | 0.38  | 0.34  | 0.24  | 0.18  |
| Cambodia   | G4946     | 1              | 1.00 | 1.00 | 0.99 | 0.99 | 0.97 | 0.96 | 0.93 | 0.91 | 0.88  | 0.85  | 0.77  | 0.69  | 0.59  | 0.49  | 0.38  | 0.15  | 0.03  |
| China      | G0744     | 1              | 1.00 | 1.00 | 1.00 | 1.00 | 1.00 | 0.99 | 0.99 | 0.98 | 0.96  | 0.92  | 0.84  | 0.75  | 0.68  | 0.63  | 0.58  | 0.51  | 0.53  |
| China      | G0804     | 1              | 0.97 | 0.86 | 0.68 | 0.49 | 0.33 | 0.20 | 0.11 | 0.01 | -0.07 | -0.12 | -0.21 | -0.28 | -0.34 | -0.26 | -0.15 | -0.03 | 0.00  |
| China      | G0833     | 1              | 0.98 | 0.97 | 0.95 | 0.94 | 0.93 | 0.92 | 0.91 | 0.90 | 0.89  | 0.88  | 0.86  | 0.83  | 0.80  | 0.78  | 0.75  | 0.67  | 0.60  |
| China      | G0862     | 1              | 0.98 | 0.92 | 0.86 | 0.80 | 0.75 | 0.70 | 0.65 | 0.61 | 0.58  | 0.54  | 0.48  | 0.41  | 0.34  | 0.29  | 0.25  | 0.19  | 0.15  |
| China      | G0893     | 1              | 0.99 | 0.98 | 0.95 | 0.91 | 0.88 | 0.84 | 0.79 | 0.75 | 0.70  | 0.65  | 0.56  | 0.46  | 0.38  | 0.29  | 0.21  | 0.05  | -0.06 |
| China      | G0916     | 1              | 0.97 | 0.90 | 0.80 | 0.68 | 0.56 | 0.46 | 0.37 | 0.29 | 0.23  | 0.18  | 0.07  | 0.00  | -0.05 | -0.01 | 0.02  | 0.00  | -0.03 |
| China      | G0931     | 1              | 1.00 | 1.00 | 1.00 | 0.99 | 0.99 | 0.98 | 0.98 | 0.97 | 0.96  | 0.94  | 0.92  | 0.89  | 0.86  | 0.82  | 0.79  | 0.71  | 0.65  |
| China      | G1720     | 1              | 1.00 | 0.99 | 0.98 | 0.97 | 0.95 | 0.92 | 0.89 | 0.86 | 0.83  | 0.80  | 0.74  | 0.68  | 0.63  | 0.59  | 0.55  | 0.47  | 0.40  |
| China      | G1746     | 1              | 1.00 | 0.99 | 0.98 | 0.96 | 0.94 | 0.90 | 0.87 | 0.83 | 0.79  | 0.75  | 0.68  | 0.62  | 0.57  | 0.53  | 0.50  | 0.42  | 0.36  |
| China      | G1747     | 1              | 1.00 | 1.00 | 1.00 | 0.99 | 0.99 | 0.98 | 0.97 | 0.95 | 0.93  | 0.91  | 0.86  | 0.81  | 0.76  | 0.71  | 0.67  | 0.58  | 0.50  |
| China      | G1748     | 1              | 0.91 | 0.82 | 0.76 | 0.69 | 0.65 | 0.59 | 0.58 | 0.51 | 0.46  | 0.46  | 0.39  | 0.40  | 0.36  | 0.35  | 0.35  | 0.31  | 0.28  |
| China      | G1749     | 1              | 0.89 | 0.80 | 0.79 | 0.71 | 0.68 | 0.64 | 0.64 | 0.57 | 0.54  | 0.56  | 0.49  | 0.50  | 0.44  | 0.45  | 0.44  | 0.41  | 0.39  |
| China      | G1750     | 1              | 0.97 | 0.94 | 0.91 | 0.88 | 0.84 | 0.81 | 0.78 | 0.75 | 0.72  | 0.71  | 0.68  | 0.65  | 0.61  | 0.60  | 0.58  | 0.55  | 0.51  |
| China      | G1751     | 1              | 1.00 | 1.00 | 0.99 | 0.98 | 0.97 | 0.95 | 0.93 | 0.91 | 0.88  | 0.84  | 0.78  | 0.71  | 0.64  | 0.57  | 0.52  | 0.40  | 0.34  |
| China      | G1933     | 1              | 0.99 | 0.98 | 0.95 | 0.93 | 0.90 | 0.87 | 0.84 | 0.81 | 0.78  | 0.74  | 0.66  | 0.57  | 0.48  | 0.40  | 0.33  | 0.22  | 0.19  |
| China      | G1944     | 1              | 1.00 | 1.00 | 1.00 | 1.00 | 1.00 | 0.99 | 0.99 | 0.97 | 0.95  | 0.91  | 0.82  | 0.74  | 0.67  | 0.61  | 0.57  | 0.51  | 0.53  |
| China      | G1945     | 1              | 1.00 | 1.00 | 1.00 | 0.99 | 0.98 | 0.95 | 0.91 | 0.86 | 0.81  | 0.76  | 0.68  | 0.62  | 0.58  | 0.54  | 0.51  | 0.52  | 0.53  |
| China      | G1946     | 1              | 1.00 | 0.99 | 0.98 | 0.97 | 0.95 | 0.93 | 0.92 | 0.91 | 0.90  | 0.89  | 0.87  | 0.86  | 0.84  | 0.84  | 0.82  | 0.77  | 0.71  |
| China      | G1947     | 1              | 0.99 | 0.97 | 0.92 | 0.81 | 0.74 | 0.70 | 0.65 | 0.58 | 0.55  | 0.52  | 0.43  | 0.40  | 0.36  | 0.33  | 0.32  | 0.28  | 0.26  |
| China      | G1948     | 1              | 1.00 | 0.99 | 0.98 | 0.96 | 0.94 | 0.93 | 0.91 | 0.90 | 0.88  | 0.87  | 0.84  | 0.81  | 0.79  | 0.77  | 0.76  | 0.73  | 0.70  |
| China      | G1949     | 1              | 1.00 | 1.00 | 1.00 | 0.99 | 0.99 | 0.97 | 0.95 | 0.94 | 0.93  | 0.91  | 0.88  | 0.85  | 0.82  | 0.80  | 0.78  | 0.74  | 0.71  |
| China      | G1950     | 1              | 1.00 | 1.00 | 1.00 | 0.99 | 0.99 | 0.99 | 0.98 | 0.97 | 0.95  | 0.94  | 0.91  | 0.88  | 0.85  | 0.82  | 0.80  | 0.75  | 0.72  |
| China      | G1951     | 1              | 1.00 | 0.99 | 0.97 | 0.93 | 0.87 | 0.82 | 0.77 | 0.69 | 0.63  | 0.58  | 0.48  | 0.41  | 0.36  | 0.34  | 0.28  | 0.25  | 0.20  |



| Country | GloFAS ID | Station filter | LT1  | LT2  | LT3  | LT4  | LT5  | LT6  | LT7   | LT8   | LT9   | LT10  | LT12  | LT14  | LT16  | LT18  | LT20  | LT25  | L30   |
|---------|-----------|----------------|------|------|------|------|------|------|-------|-------|-------|-------|-------|-------|-------|-------|-------|-------|-------|
| China   | G1952     | 1              | 0.98 | 0.91 | 0.83 | 0.76 | 0.68 | 0.62 | 0.58  | 0.55  | 0.49  | 0.46  | 0.44  | 0.39  | 0.35  | 0.36  | 0.33  | 0.31  | 0.28  |
| China   | G1953     | 1              | 1.00 | 1.00 | 1.00 | 0.99 | 0.99 | 0.98 | 0.98  | 0.97  | 0.97  | 0.96  | 0.94  | 0.92  | 0.88  | 0.84  | 0.80  | 0.69  | 0.59  |
| China   | G1954     | 1              | 0.99 | 0.96 | 0.92 | 0.86 | 0.80 | 0.74 | 0.69  | 0.64  | 0.60  | 0.56  | 0.49  | 0.44  | 0.40  | 0.35  | 0.32  | 0.24  | 0.18  |
| China   | G1955     | 1              | 0.99 | 0.96 | 0.91 | 0.87 | 0.82 | 0.77 | 0.73  | 0.69  | 0.65  | 0.62  | 0.56  | 0.50  | 0.47  | 0.43  | 0.39  | 0.31  | 0.26  |
| China   | G1956     | 1              | 0.95 | 0.88 | 0.82 | 0.76 | 0.72 | 0.68 | 0.65  | 0.61  | 0.57  | 0.55  | 0.48  | 0.44  | 0.40  | 0.36  | 0.33  | 0.25  | 0.21  |
| China   | G1957     | 1              | 0.95 | 0.89 | 0.83 | 0.77 | 0.72 | 0.69 | 0.65  | 0.61  | 0.57  | 0.54  | 0.47  | 0.43  | 0.39  | 0.34  | 0.30  | 0.23  | 0.17  |
| China   | G1958     | 1              | 1.00 | 0.98 | 0.96 | 0.94 | 0.90 | 0.86 | 0.83  | 0.80  | 0.77  | 0.74  | 0.69  | 0.63  | 0.59  | 0.55  | 0.52  | 0.42  | 0.35  |
| China   | G1959     | 1              | 1.00 | 0.99 | 0.98 | 0.96 | 0.94 | 0.91 | 0.89  | 0.86  | 0.83  | 0.80  | 0.73  | 0.67  | 0.61  | 0.57  | 0.53  | 0.43  | 0.36  |
| China   | G1960     | 1              | 1.00 | 0.97 | 0.93 | 0.87 | 0.82 | 0.78 | 0.75  | 0.71  | 0.67  | 0.63  | 0.56  | 0.50  | 0.46  | 0.42  | 0.38  | 0.31  | 0.27  |
| China   | G1961     | 1              | 0.97 | 0.90 | 0.83 | 0.77 | 0.72 | 0.68 | 0.65  | 0.61  | 0.56  | 0.52  | 0.46  | 0.42  | 0.39  | 0.34  | 0.32  | 0.26  | 0.22  |
| China   | G1962     | 1              | 0.99 | 0.96 | 0.93 | 0.88 | 0.82 | 0.77 | 0.73  | 0.69  | 0.65  | 0.62  | 0.56  | 0.51  | 0.46  | 0.43  | 0.40  | 0.32  | 0.29  |
| China   | G1963     | 1              | 0.99 | 0.96 | 0.92 | 0.87 | 0.83 | 0.78 | 0.74  | 0.69  | 0.65  | 0.62  | 0.56  | 0.51  | 0.46  | 0.42  | 0.39  | 0.33  | 0.30  |
| China   | G3341     | 1              | 0.99 | 0.96 | 0.90 | 0.83 | 0.78 | 0.74 | 0.70  | 0.68  | 0.67  | 0.64  | 0.60  | 0.56  | 0.55  | 0.55  | 0.56  | 0.52  | 0.50  |
| China   | G3355     | 1              | 0.97 | 0.88 | 0.77 | 0.67 | 0.60 | 0.55 | 0.53  | 0.49  | 0.47  | 0.46  | 0.45  | 0.43  | 0.43  | 0.48  | 0.52  | 0.51  | 0.48  |
| China   | G3414     | 1              | 0.97 | 0.83 | 0.65 | 0.53 | 0.47 | 0.43 | 0.39  | 0.37  | 0.35  | 0.34  | 0.32  | 0.31  | 0.32  | 0.43  | 0.49  | 0.49  | 0.45  |
| China   | G3445     | 1              | 0.98 | 0.91 | 0.81 | 0.74 | 0.69 | 0.66 | 0.63  | 0.61  | 0.59  | 0.58  | 0.55  | 0.52  | 0.51  | 0.52  | 0.53  | 0.52  | 0.49  |
| China   | G3519     | 1              | 0.99 | 0.96 | 0.91 | 0.85 | 0.81 | 0.77 | 0.75  | 0.72  | 0.70  | 0.68  | 0.64  | 0.61  | 0.58  | 0.59  | 0.58  | 0.56  | 0.53  |
| China   | G3533     | 1              | 0.98 | 0.92 | 0.84 | 0.78 | 0.74 | 0.70 | 0.68  | 0.66  | 0.64  | 0.62  | 0.59  | 0.56  | 0.55  | 0.56  | 0.55  | 0.52  | 0.49  |
| China   | G3534     | 1              | 1.00 | 0.98 | 0.95 | 0.89 | 0.84 | 0.79 | 0.74  | 0.71  | 0.68  | 0.66  | 0.62  | 0.57  | 0.55  | 0.54  | 0.55  | 0.53  | 0.50  |
| China   | G3541     | 1              | 0.99 | 0.98 | 0.94 | 0.89 | 0.85 | 0.82 | 0.78  | 0.76  | 0.73  | 0.71  | 0.68  | 0.64  | 0.61  | 0.60  | 0.59  | 0.56  | 0.53  |
| China   | G3575     | 1              | 1.00 | 0.97 | 0.93 | 0.87 | 0.83 | 0.79 | 0.76  | 0.74  | 0.70  | 0.68  | 0.65  | 0.61  | 0.57  | 0.57  | 0.56  | 0.53  | 0.50  |
| China   | G3577     | 1              | 1.00 | 0.99 | 0.96 | 0.92 | 0.88 | 0.83 | 0.80  | 0.77  | 0.74  | 0.72  | 0.69  | 0.65  | 0.63  | 0.61  | 0.61  | 0.59  | 0.55  |
| China   | G3584     | 1              | 1.00 | 1.00 | 0.99 | 0.99 | 0.98 | 0.97 | 0.96  | 0.94  | 0.93  | 0.91  | 0.87  | 0.83  | 0.80  | 0.77  | 0.75  | 0.69  | 0.65  |
| China   | G3585     | 1              | 1.00 | 0.99 | 0.97 | 0.93 | 0.88 | 0.83 | 0.79  | 0.75  | 0.71  | 0.67  | 0.61  | 0.57  | 0.52  | 0.48  | 0.45  | 0.39  | 0.35  |
| China   | G3586     | 1              | 0.97 | 0.90 | 0.83 | 0.78 | 0.72 | 0.68 | 0.65  | 0.61  | 0.57  | 0.54  | 0.51  | 0.47  | 0.44  | 0.42  | 0.39  | 0.36  | 0.32  |
| China   | G3594     | 1              | 0.97 | 0.92 | 0.84 | 0.80 | 0.78 | 0.74 | 0.72  | 0.71  | 0.69  | 0.67  | 0.64  | 0.61  | 0.60  | 0.59  | 0.58  | 0.55  | 0.53  |
| China   | G3595     | 1              | 1.00 | 1.00 | 0.99 | 0.98 | 0.97 | 0.95 | 0.93  | 0.91  | 0.89  | 0.87  | 0.83  | 0.78  | 0.75  | 0.72  | 0.69  | 0.64  | 0.61  |
| China   | G3596     | 1              | 1.00 | 1.00 | 0.99 | 0.98 | 0.96 | 0.95 | 0.93  | 0.91  | 0.89  | 0.86  | 0.82  | 0.79  | 0.75  | 0.72  | 0.69  | 0.63  | 0.59  |
| China   | G3604     | 1              | 0.96 | 0.90 | 0.84 | 0.78 | 0.72 | 0.69 | 0.68  | 0.64  | 0.60  | 0.61  | 0.54  | 0.54  | 0.49  | 0.51  | 0.49  | 0.46  | 0.43  |
| China   | G3605     | 1              | 0.99 | 0.97 | 0.93 | 0.89 | 0.84 | 0.80 | 0.76  | 0.73  | 0.71  | 0.69  | 0.65  | 0.62  | 0.59  | 0.57  | 0.57  | 0.55  | 0.51  |
| China   | G3620     | 1              | 0.96 | 0.87 | 0.79 | 0.70 | 0.61 | 0.57 | 0.57  | 0.54  | 0.46  | 0.47  | 0.42  | 0.46  | 0.38  | 0.45  | 0.40  | 0.41  | 0.32  |
| China   | G3621     | 1              | 0.96 | 0.90 | 0.84 | 0.78 | 0.74 | 0.70 | 0.68  | 0.65  | 0.63  | 0.63  | 0.57  | 0.54  | 0.52  | 0.52  | 0.51  | 0.48  | 0.46  |
| China   | G3646     | 1              | 1.00 | 1.00 | 0.99 | 0.98 | 0.95 | 0.93 | 0.90  | 0.87  | 0.83  | 0.80  | 0.73  | 0.67  | 0.61  | 0.55  | 0.50  | 0.41  | 0.34  |
| China   | G3669     | 1              | 0.94 | 0.88 | 0.82 | 0.75 | 0.72 | 0.70 | 0.66  | 0.61  | 0.59  | 0.57  | 0.51  | 0.51  | 0.48  | 0.48  | 0.48  | 0.44  | 0.39  |
| China   | G3670     | 1              | 1.00 | 0.99 | 0.96 | 0.92 | 0.88 | 0.84 | 0.80  | 0.77  | 0.75  | 0.73  | 0.68  | 0.65  | 0.61  | 0.59  | 0.58  | 0.56  | 0.51  |
| China   | G3675     | 1              | 0.96 | 0.78 | 0.54 | 0.34 | 0.18 | 0.04 | -0.04 | -0.10 | -0.16 | -0.20 | -0.28 | -0.33 | -0.34 | -0.30 | -0.28 | -0.24 | -0.23 |
| China   | G3679     | 1              | 0.88 | 0.63 | 0.44 | 0.30 | 0.18 | 0.09 | 0.04  | -0.01 | -0.06 | -0.10 | -0.16 | -0.21 | -0.21 | -0.12 | -0.12 | -0.12 | -0.10 |
| China   | G3681     | 1              | 1.00 | 0.99 | 0.96 | 0.92 | 0.88 | 0.84 | 0.79  | 0.76  | 0.73  | 0.70  | 0.66  | 0.63  | 0.59  | 0.58  | 0.57  | 0.55  | 0.50  |
| China   | G3682     | 1              | 0.98 | 0.93 | 0.86 | 0.78 | 0.70 | 0.63 | 0.56  | 0.51  | 0.47  | 0.43  | 0.37  | 0.33  | 0.29  | 0.23  | 0.21  | 0.15  | 0.12  |

| Country | GloFAS ID | Station filter | LT1  | LT2  | LT3  | LT4  | LT5  | LT6   | LT7   | LT8   | LT9   | LT10  | LT12  | LT14  | LT16  | LT18  | LT20  | LT25  | L30   |
|---------|-----------|----------------|------|------|------|------|------|-------|-------|-------|-------|-------|-------|-------|-------|-------|-------|-------|-------|
| China   | G3685     | 1              | 0.96 | 0.73 | 0.45 | 0.23 | 0.05 | -0.08 | -0.17 | -0.23 | -0.29 | -0.32 | -0.39 | -0.42 | -0.45 | -0.46 | -0.45 | -0.40 | -0.38 |
| China   | G3687     | 1              | 0.99 | 0.97 | 0.93 | 0.89 | 0.85 | 0.82  | 0.78  | 0.75  | 0.72  | 0.70  | 0.63  | 0.61  | 0.58  | 0.56  | 0.55  | 0.49  | 0.45  |
| China   | G3701     | 1              | 0.97 | 0.89 | 0.82 | 0.73 | 0.67 | 0.61  | 0.54  | 0.49  | 0.46  | 0.44  | 0.37  | 0.31  | 0.28  | 0.26  | 0.26  | 0.23  | 0.20  |
| China   | G3705     | 1              | 0.98 | 0.92 | 0.84 | 0.76 | 0.69 | 0.62  | 0.56  | 0.50  | 0.47  | 0.43  | 0.37  | 0.33  | 0.29  | 0.24  | 0.22  | 0.16  | 0.13  |
| China   | G3711     | 1              | 1.00 | 0.99 | 0.98 | 0.98 | 0.97 | 0.96  | 0.95  | 0.94  | 0.93  | 0.92  | 0.90  | 0.87  | 0.84  | 0.81  | 0.77  | 0.70  | 0.64  |
| China   | G3715     | 1              | 0.96 | 0.92 | 0.86 | 0.80 | 0.76 | 0.73  | 0.69  | 0.67  | 0.66  | 0.65  | 0.61  | 0.59  | 0.58  | 0.57  | 0.54  | 0.52  | 0.52  |
| China   | G3720     | 1              | 0.99 | 0.98 | 0.97 | 0.96 | 0.95 | 0.94  | 0.93  | 0.91  | 0.90  | 0.89  | 0.86  | 0.84  | 0.81  | 0.78  | 0.75  | 0.68  | 0.63  |
| China   | G3721     | 1              | 0.96 | 0.87 | 0.76 | 0.70 | 0.64 | 0.60  | 0.56  | 0.49  | 0.49  | 0.47  | 0.43  | 0.37  | 0.37  | 0.30  | 0.32  | 0.24  | 0.27  |
| China   | G3722     | 1              | 0.94 | 0.85 | 0.70 | 0.64 | 0.61 | 0.57  | 0.50  | 0.46  | 0.46  | 0.40  | 0.39  | 0.35  | 0.35  | 0.25  | 0.30  | 0.20  | 0.21  |
| China   | G3728     | 1              | 0.97 | 0.92 | 0.85 | 0.78 | 0.75 | 0.71  | 0.66  | 0.66  | 0.65  | 0.62  | 0.62  | 0.57  | 0.59  | 0.59  | 0.58  | 0.58  | 0.57  |
| China   | G3734     | 1              | 0.91 | 0.82 | 0.69 | 0.64 | 0.61 | 0.54  | 0.50  | 0.46  | 0.46  | 0.42  | 0.43  | 0.35  | 0.37  | 0.30  | 0.29  | 0.24  | 0.25  |
| China   | G3735     | 1              | 0.97 | 0.84 | 0.71 | 0.62 | 0.55 | 0.51  | 0.49  | 0.46  | 0.45  | 0.43  | 0.40  | 0.39  | 0.38  | 0.46  | 0.53  | 0.52  | 0.48  |
| China   | G3739     | 1              | 0.96 | 0.88 | 0.79 | 0.72 | 0.69 | 0.64  | 0.59  | 0.57  | 0.56  | 0.52  | 0.50  | 0.45  | 0.46  | 0.41  | 0.42  | 0.35  | 0.35  |
| China   | G3740     | 1              | 0.98 | 0.95 | 0.91 | 0.88 | 0.85 | 0.81  | 0.77  | 0.74  | 0.71  | 0.69  | 0.65  | 0.62  | 0.59  | 0.56  | 0.55  | 0.48  | 0.45  |
| China   | G3749     | 1              | 0.92 | 0.83 | 0.75 | 0.63 | 0.58 | 0.52  | 0.48  | 0.42  | 0.41  | 0.41  | 0.32  | 0.28  | 0.25  | 0.26  | 0.26  | 0.25  | 0.22  |
| China   | G3753     | 1              | 0.98 | 0.95 | 0.92 | 0.88 | 0.85 | 0.81  | 0.79  | 0.75  | 0.73  | 0.71  | 0.67  | 0.65  | 0.62  | 0.59  | 0.58  | 0.51  | 0.47  |
| China   | G3754     | 1              | 0.97 | 0.89 | 0.83 | 0.76 | 0.72 | 0.65  | 0.58  | 0.55  | 0.50  | 0.46  | 0.41  | 0.35  | 0.33  | 0.30  | 0.29  | 0.26  | 0.23  |
| China   | G3761     | 1              | 0.95 | 0.88 | 0.79 | 0.70 | 0.67 | 0.62  | 0.57  | 0.54  | 0.53  | 0.49  | 0.47  | 0.42  | 0.42  | 0.36  | 0.37  | 0.30  | 0.30  |
| China   | G3762     | 1              | 0.99 | 0.95 | 0.92 | 0.88 | 0.86 | 0.82  | 0.79  | 0.76  | 0.74  | 0.72  | 0.68  | 0.66  | 0.63  | 0.60  | 0.59  | 0.52  | 0.48  |
| China   | G3766     | 1              | 0.97 | 0.92 | 0.61 | 0.60 | 0.62 | 0.61  | 0.45  | 0.47  | 0.54  | 0.39  | 0.48  | 0.34  | 0.47  | 0.38  | 0.43  | 0.35  | 0.43  |
| China   | G3767     | 1              | 0.99 | 0.98 | 0.96 | 0.95 | 0.93 | 0.92  | 0.91  | 0.89  | 0.88  | 0.87  | 0.85  | 0.82  | 0.79  | 0.77  | 0.73  | 0.67  | 0.62  |
| China   | G3768     | 1              | 0.99 | 0.95 | 0.92 | 0.89 | 0.87 | 0.83  | 0.81  | 0.78  | 0.76  | 0.75  | 0.72  | 0.69  | 0.66  | 0.64  | 0.63  | 0.56  | 0.52  |
| China   | G3769     | 1              | 0.91 | 0.81 | 0.74 | 0.67 | 0.65 | 0.59  | 0.55  | 0.49  | 0.47  | 0.46  | 0.41  | 0.41  | 0.36  | 0.35  | 0.31  | 0.30  | 0.24  |
| China   | G3770     | 1              | 0.95 | 0.84 | 0.74 | 0.64 | 0.56 | 0.47  | 0.36  | 0.32  | 0.27  | 0.22  | 0.14  | 0.09  | 0.05  | 0.03  | 0.03  | 0.03  | 0.01  |
| China   | G3771     | 1              | 0.97 | 0.90 | 0.82 | 0.74 | 0.67 | 0.60  | 0.53  | 0.49  | 0.45  | 0.41  | 0.35  | 0.30  | 0.27  | 0.23  | 0.21  | 0.17  | 0.15  |
| China   | G3776     | 1              | 1.00 | 0.99 | 0.96 | 0.88 | 0.72 | 0.48  | 0.22  | 0.01  | -0.12 | -0.23 | -0.42 | -0.57 | -0.57 | -0.57 | -0.58 | -0.57 | -0.55 |
| China   | G3777     | 1              | 0.98 | 0.92 | 0.75 | 0.71 | 0.68 | 0.65  | 0.52  | 0.53  | 0.53  | 0.42  | 0.44  | 0.33  | 0.36  | 0.34  | 0.32  | 0.30  | 0.32  |
| China   | G3778     | 1              | 0.93 | 0.84 | 0.70 | 0.63 | 0.58 | 0.48  | 0.45  | 0.40  | 0.41  | 0.36  | 0.32  | 0.27  | 0.26  | 0.20  | 0.21  | 0.11  | 0.11  |
| China   | G3779     | 1              | 0.99 | 0.96 | 0.92 | 0.89 | 0.87 | 0.84  | 0.81  | 0.79  | 0.77  | 0.75  | 0.73  | 0.70  | 0.67  | 0.64  | 0.64  | 0.56  | 0.53  |
| China   | G3780     | 1              | 0.97 | 0.90 | 0.82 | 0.73 | 0.67 | 0.61  | 0.55  | 0.51  | 0.48  | 0.44  | 0.39  | 0.33  | 0.31  | 0.27  | 0.25  | 0.21  | 0.19  |
| China   | G3785     | 1              | 0.97 | 0.90 | 0.78 | 0.70 | 0.65 | 0.59  | 0.55  | 0.48  | 0.47  | 0.45  | 0.43  | 0.38  | 0.37  | 0.28  | 0.31  | 0.22  | 0.24  |
| China   | G3790     | 1              | 1.00 | 0.99 | 0.95 | 0.83 | 0.68 | 0.51  | 0.34  | 0.18  | 0.05  | -0.07 | -0.24 | -0.36 | -0.46 | -0.51 | -0.48 | -0.20 | -0.08 |
| China   | G3792     | 1              | 1.00 | 1.00 | 1.00 | 0.99 | 0.98 | 0.98  | 0.97  | 0.95  | 0.93  | 0.92  | 0.88  | 0.85  | 0.79  | 0.73  | 0.67  | 0.52  | 0.37  |
| China   | G3793     | 1              | 1.00 | 1.00 | 1.00 | 1.00 | 0.99 | 0.99  | 0.99  | 0.99  | 0.98  | 0.98  | 0.96  | 0.95  | 0.92  | 0.88  | 0.83  | 0.66  | 0.49  |
| China   | G3794     | 1              | 0.96 | 0.90 | 0.77 | 0.69 | 0.63 | 0.56  | 0.53  | 0.46  | 0.45  | 0.43  | 0.41  | 0.36  | 0.34  | 0.26  | 0.28  | 0.19  | 0.20  |
| China   | G3795     | 1              | 0.95 | 0.85 | 0.77 | 0.70 | 0.65 | 0.57  | 0.52  | 0.50  | 0.46  | 0.42  | 0.37  | 0.32  | 0.30  | 0.27  | 0.24  | 0.21  | 0.20  |
| China   | G3800     | 1              | 0.97 | 0.89 | 0.80 | 0.74 | 0.70 | 0.64  | 0.56  | 0.56  | 0.54  | 0.46  | 0.47  | 0.37  | 0.37  | 0.39  | 0.35  | 0.35  | 0.34  |
| China   | G3801     | 1              | 0.99 | 0.98 | 0.95 | 0.93 | 0.92 | 0.91  | 0.88  | 0.87  | 0.86  | 0.84  | 0.82  | 0.78  | 0.76  | 0.74  | 0.71  | 0.64  | 0.60  |
| China   | G3802     | 1              | 0.99 | 0.97 | 0.94 | 0.93 | 0.91 | 0.89  | 0.87  | 0.85  | 0.84  | 0.82  | 0.80  | 0.76  | 0.74  | 0.72  | 0.69  | 0.62  | 0.58  |

| Country | GloFAS ID | Station filter | LT1  | LT2  | LT3   | LT4   | LT5   | LT6   | LT7   | LT8   | LT9   | LT10  | LT12  | LT14  | LT16  | LT18  | LT20  | LT25  | L30   |
|---------|-----------|----------------|------|------|-------|-------|-------|-------|-------|-------|-------|-------|-------|-------|-------|-------|-------|-------|-------|
| China   | G3803     | 1              | 0.99 | 0.96 | 0.93  | 0.91  | 0.89  | 0.87  | 0.85  | 0.83  | 0.82  | 0.80  | 0.79  | 0.75  | 0.73  | 0.72  | 0.70  | 0.64  | 0.61  |
| China   | G3804     | 1              | 0.99 | 0.96 | 0.93  | 0.90  | 0.89  | 0.86  | 0.84  | 0.82  | 0.80  | 0.78  | 0.76  | 0.73  | 0.71  | 0.68  | 0.67  | 0.60  | 0.57  |
| China   | G3805     | 1              | 0.96 | 0.87 | 0.79  | 0.72  | 0.66  | 0.57  | 0.51  | 0.49  | 0.45  | 0.41  | 0.39  | 0.33  | 0.29  | 0.28  | 0.25  | 0.24  | 0.19  |
| China   | G3809     | 1              | 1.00 | 0.98 | 0.89  | 0.73  | 0.54  | 0.35  | 0.17  | -0.01 | -0.15 | -0.26 | -0.43 | -0.54 | -0.63 | -0.66 | -0.60 | -0.34 | -0.26 |
| China   | G3810     | 1              | 1.00 | 0.99 | 0.95  | 0.86  | 0.73  | 0.61  | 0.49  | 0.38  | 0.29  | 0.22  | 0.08  | -0.01 | -0.08 | -0.12 | -0.10 | 0.00  | 0.03  |
| China   | G3811     | 1              | 0.96 | 0.91 | 0.62  | 0.65  | 0.66  | 0.66  | 0.50  | 0.55  | 0.58  | 0.40  | 0.49  | 0.37  | 0.48  | 0.42  | 0.42  | 0.39  | 0.45  |
| China   | G3812     | 1              | 0.94 | 0.86 | 0.76  | 0.67  | 0.56  | 0.50  | 0.47  | 0.41  | 0.40  | 0.35  | 0.34  | 0.27  | 0.28  | 0.23  | 0.21  | 0.15  | 0.14  |
| China   | G3813     | 1              | 0.98 | 0.95 | 0.91  | 0.90  | 0.88  | 0.85  | 0.84  | 0.83  | 0.80  | 0.79  | 0.79  | 0.75  | 0.73  | 0.73  | 0.72  | 0.68  | 0.66  |
| China   | G3819     | 1              | 0.96 | 0.89 | 0.76  | 0.67  | 0.62  | 0.63  | 0.59  | 0.54  | 0.53  | 0.44  | 0.48  | 0.42  | 0.45  | 0.38  | 0.39  | 0.33  | 0.37  |
| China   | G3825     | 1              | 0.93 | 0.86 | 0.76  | 0.68  | 0.60  | 0.52  | 0.47  | 0.42  | 0.40  | 0.36  | 0.33  | 0.27  | 0.24  | 0.20  | 0.20  | 0.16  | 0.13  |
| China   | G3829     | 1              | 0.98 | 0.96 | 0.94  | 0.93  | 0.91  | 0.90  | 0.89  | 0.88  | 0.87  | 0.86  | 0.85  | 0.83  | 0.81  | 0.80  | 0.79  | 0.76  | 0.73  |
| China   | G3832     | 1              | 0.91 | 0.83 | 0.74  | 0.71  | 0.65  | 0.58  | 0.59  | 0.52  | 0.50  | 0.47  | 0.48  | 0.46  | 0.41  | 0.44  | 0.40  | 0.40  | 0.35  |
| China   | G3846     | 1              | 1.00 | 1.00 | 1.00  | 0.99  | 0.98  | 0.95  | 0.87  | 0.85  | 0.85  | 0.82  | 0.72  | 0.64  | 0.66  | 0.58  | 0.55  | 0.47  | 0.45  |
| China   | G3850     | 1              | 1.00 | 0.99 | 0.99  | 0.98  | 0.97  | 0.91  | 0.88  | 0.87  | 0.82  | 0.77  | 0.70  | 0.60  | 0.54  | 0.49  | 0.42  | 0.38  | 0.33  |
| China   | G3856     | 1              | 1.00 | 0.89 | 0.85  | 0.87  | 0.75  | 0.67  | 0.67  | 0.67  | 0.53  | 0.49  | 0.47  | 0.43  | 0.38  | 0.40  | 0.34  | 0.36  | 0.35  |
| China   | G3861     | 1              | 0.93 | 0.59 | 0.21  | -0.04 | -0.23 | -0.38 | -0.47 | -0.54 | -0.61 | -0.66 | -0.70 | -0.75 | -0.76 | -0.60 | -0.41 | -0.28 | -0.28 |
| China   | G3864     | 1              | 0.99 | 0.97 | 0.93  | 0.84  | 0.69  | 0.51  | 0.32  | 0.12  | -0.05 | -0.20 | -0.43 | -0.58 | -0.69 | -0.75 | -0.75 | -0.57 | -0.53 |
| China   | G3866     | 1              | 1.00 | 1.00 | 0.99  | 0.98  | 0.97  | 0.96  | 0.94  | 0.92  | 0.90  | 0.86  | 0.80  | 0.75  | 0.69  | 0.65  | 0.61  | 0.55  | 0.51  |
| China   | G3867     | 1              | 1.00 | 0.97 | 0.95  | 0.93  | 0.90  | 0.86  | 0.82  | 0.78  | 0.75  | 0.72  | 0.63  | 0.55  | 0.50  | 0.46  | 0.40  | 0.35  | 0.28  |
| China   | G3870     | 1              | 1.00 | 1.00 | 0.98  | 0.96  | 0.94  | 0.90  | 0.83  | 0.77  | 0.73  | 0.67  | 0.58  | 0.52  | 0.47  | 0.43  | 0.41  | 0.33  | 0.30  |
| China   | G3871     | 1              | 1.00 | 1.00 | 1.00  | 0.99  | 0.98  | 0.96  | 0.95  | 0.93  | 0.91  | 0.88  | 0.79  | 0.75  | 0.72  | 0.67  | 0.65  | 0.58  | 0.54  |
| China   | G3872     | 1              | 1.00 | 0.99 | 0.97  | 0.95  | 0.93  | 0.90  | 0.87  | 0.83  | 0.80  | 0.77  | 0.70  | 0.63  | 0.57  | 0.52  | 0.47  | 0.40  | 0.35  |
| China   | G3873     | 1              | 0.98 | 0.93 | 0.86  | 0.77  | 0.71  | 0.66  | 0.58  | 0.58  | 0.53  | 0.48  | 0.44  | 0.40  | 0.38  | 0.37  | 0.38  | 0.34  | 0.32  |
| China   | G3875     | 1              | 0.99 | 0.96 | 0.93  | 0.85  | 0.73  | 0.69  | 0.67  | 0.59  | 0.52  | 0.50  | 0.49  | 0.51  | 0.44  | 0.45  | 0.45  | 0.38  | 0.37  |
| China   | G3876     | 1              | 1.00 | 0.99 | 0.99  | 0.98  | 0.96  | 0.95  | 0.94  | 0.93  | 0.91  | 0.89  | 0.88  | 0.85  | 0.84  | 0.83  | 0.81  | 0.78  | 0.74  |
| China   | G3877     | 1              | 1.00 | 0.97 | 0.92  | 0.82  | 0.75  | 0.72  | 0.66  | 0.60  | 0.62  | 0.62  | 0.59  | 0.56  | 0.55  | 0.52  | 0.54  | 0.49  | 0.48  |
| China   | G3878     | 1              | 1.00 | 0.98 | 0.95  | 0.93  | 0.86  | 0.82  | 0.79  | 0.73  | 0.66  | 0.61  | 0.56  | 0.50  | 0.44  | 0.41  | 0.38  | 0.32  | 0.33  |
| China   | G3881     | 1              | 0.95 | 0.88 | 0.81  | 0.74  | 0.68  | 0.64  | 0.61  | 0.59  | 0.55  | 0.54  | 0.50  | 0.47  | 0.44  | 0.46  | 0.43  | 0.40  | 0.35  |
| China   | G3883     | 1              | 0.99 | 0.98 | 0.96  | 0.95  | 0.93  | 0.92  | 0.91  | 0.90  | 0.88  | 0.88  | 0.86  | 0.83  | 0.82  | 0.80  | 0.79  | 0.75  | 0.71  |
| China   | G3886     | 1              | 0.99 | 0.96 | 0.90  | 0.84  | 0.78  | 0.73  | 0.66  | 0.62  | 0.60  | 0.56  | 0.49  | 0.43  | 0.40  | 0.37  | 0.35  | 0.30  | 0.28  |
| China   | G3889     | 1              | 0.86 | 0.36 | -0.03 | -0.27 | -0.42 | -0.53 | -0.59 | -0.64 | -0.67 | -0.69 | -0.73 | -0.76 | -0.76 | -0.47 | -0.31 | -0.27 | -0.28 |
| China   | G3898     | 1              | 1.00 | 0.98 | 0.91  | 0.79  | 0.65  | 0.49  | 0.34  | 0.20  | 0.08  | -0.03 | -0.20 | -0.31 | -0.41 | -0.46 | -0.44 | -0.21 | -0.06 |
| China   | G3909     | 1              | 1.00 | 1.00 | 1.00  | 0.99  | 0.99  | 0.99  | 0.98  | 0.98  | 0.97  | 0.96  | 0.93  | 0.90  | 0.87  | 0.83  | 0.80  | 0.67  | 0.54  |
| China   | G3914     | 1              | 1.00 | 0.99 | 0.98  | 0.97  | 0.95  | 0.89  | 0.82  | 0.81  | 0.79  | 0.74  | 0.48  | 0.50  | 0.52  | 0.51  | 0.47  | 0.22  | 0.05  |
| China   | G3915     | 1              | 0.90 | 0.52 | 0.26  | 0.18  | 0.13  | 0.08  | 0.02  | -0.03 | -0.08 | -0.14 | -0.23 | -0.28 | -0.33 | -0.28 | -0.26 | -0.24 | -0.24 |
| China   | G3918     | 1              | 0.97 | 0.85 | 0.65  | 0.41  | 0.21  | 0.04  | -0.09 | -0.19 | -0.27 | -0.33 | -0.42 | -0.48 | -0.51 | -0.47 | -0.41 | -0.34 | -0.34 |
| China   | G3919     | 1              | 1.00 | 0.99 | 0.99  | 0.99  | 0.98  | 0.98  | 0.98  | 0.96  | 0.93  | 0.89  | 0.74  | 0.53  | 0.31  | 0.10  | -0.09 | -0.45 | -0.63 |
| China   | G3923     | 1              | 1.00 | 0.99 | 0.96  | 0.88  | 0.77  | 0.63  | 0.50  | 0.38  | 0.27  | 0.18  | 0.06  | -0.01 | -0.07 | -0.11 | -0.15 | -0.22 | -0.25 |
| China   | G3924     | 1              | 1.00 | 1.00 | 1.00  | 1.00  | 0.99  | 0.98  | 0.95  | 0.90  | 0.85  | 0.80  | 0.68  | 0.58  | 0.48  | 0.40  | 0.31  | 0.13  | 0.04  |

| Country | GloFAS ID | Station filter | LT1  | LT2  | LT3  | LT4  | LT5  | LT6  | LT7  | LT8   | LT9   | LT10  | LT12  | LT14  | LT16  | LT18  | LT20  | LT25  | L30   |
|---------|-----------|----------------|------|------|------|------|------|------|------|-------|-------|-------|-------|-------|-------|-------|-------|-------|-------|
| China   | G3925     | 1              | 1.00 | 1.00 | 1.00 | 1.00 | 1.00 | 0.99 | 0.96 | 0.93  | 0.88  | 0.83  | 0.73  | 0.63  | 0.55  | 0.47  | 0.39  | 0.21  | 0.11  |
| China   | G3926     | 1              | 1.00 | 0.99 | 0.95 | 0.91 | 0.87 | 0.82 | 0.78 | 0.75  | 0.71  | 0.69  | 0.67  | 0.64  | 0.60  | 0.59  | 0.59  | 0.57  | 0.54  |
| China   | G3931     | 1              | 1.00 | 1.00 | 0.99 | 0.95 | 0.90 | 0.83 | 0.77 | 0.71  | 0.65  | 0.59  | 0.50  | 0.41  | 0.33  | 0.25  | 0.17  | 0.07  | -0.03 |
| China   | G3932     | 1              | 1.00 | 1.00 | 0.99 | 0.99 | 0.99 | 0.98 | 0.98 | 0.98  | 0.97  | 0.97  | 0.96  | 0.96  | 0.94  | 0.92  | 0.89  | 0.79  | 0.66  |
| China   | G3933     | 1              | 1.00 | 0.99 | 0.99 | 0.98 | 0.98 | 0.97 | 0.96 | 0.95  | 0.95  | 0.94  | 0.92  | 0.89  | 0.86  | 0.80  | 0.75  | 0.66  | 0.50  |
| China   | G3934     | 1              | 1.00 | 0.99 | 0.98 | 0.97 | 0.96 | 0.95 | 0.94 | 0.93  | 0.91  | 0.90  | 0.85  | 0.78  | 0.71  | 0.32  | 0.22  | 0.27  | 0.10  |
| China   | G3935     | 1              | 0.99 | 0.97 | 0.91 | 0.83 | 0.78 | 0.74 | 0.69 | 0.65  | 0.63  | 0.63  | 0.57  | 0.53  | 0.50  | 0.49  | 0.49  | 0.44  | 0.41  |
| China   | G3938     | 1              | 1.00 | 0.97 | 0.93 | 0.89 | 0.84 | 0.80 | 0.76 | 0.72  | 0.69  | 0.68  | 0.63  | 0.59  | 0.55  | 0.54  | 0.52  | 0.45  | 0.39  |
| China   | G3945     | 1              | 1.00 | 0.95 | 0.81 | 0.72 | 0.68 | 0.69 | 0.68 | 0.67  | 0.65  | 0.62  | 0.60  | 0.58  | 0.61  | 0.59  | 0.51  | 0.50  | 0.47  |
| China   | G3947     | 1              | 1.00 | 1.00 | 1.00 | 1.00 | 1.00 | 1.00 | 1.00 | 1.00  | 1.00  | 1.00  | 0.99  | 0.97  | 0.92  | 0.86  | 0.80  | 0.64  | 0.54  |
| China   | G3948     | 1              | 1.00 | 0.92 | 0.74 | 0.52 | 0.35 | 0.22 | 0.10 | 0.00  | -0.08 | -0.14 | -0.27 | -0.37 | -0.45 | -0.49 | -0.42 | -0.34 | -0.35 |
| China   | G3949     | 1              | 1.00 | 0.99 | 0.99 | 0.99 | 0.99 | 0.98 | 0.98 | 0.98  | 0.98  | 0.98  | 0.97  | 0.97  | 0.97  | 0.96  | 0.96  | 0.95  | 0.95  |
| China   | G3950     | 1              | 1.00 | 1.00 | 0.98 | 0.93 | 0.81 | 0.67 | 0.52 | 0.39  | 0.28  | 0.19  | 0.05  | -0.05 | -0.12 | -0.19 | -0.22 | -0.21 | -0.22 |
| China   | G3956     | 1              | 1.00 | 0.98 | 0.93 | 0.84 | 0.75 | 0.69 | 0.63 | 0.58  | 0.54  | 0.50  | 0.43  | 0.35  | 0.26  | 0.17  | 0.12  | 0.00  | -0.13 |
| China   | G3957     | 0              | 1.00 | 1.00 | 1.00 | 1.00 | 1.00 | 1.00 | 1.00 | 1.00  | 1.00  | 1.00  | 1.00  | 1.00  | 1.00  | 1.00  | 1.00  | 1.00  | 1.00  |
| China   | G3958     | 1              | 1.00 | 1.00 | 1.00 | 1.00 | 0.99 | 0.99 | 0.97 | 0.95  | 0.93  | 0.90  | 0.81  | 0.69  | 0.58  | 0.47  | 0.37  | 0.15  | 0.04  |
| China   | G3959     | 1              | 1.00 | 1.00 | 1.00 | 1.00 | 0.99 | 0.99 | 0.98 | 0.97  | 0.95  | 0.93  | 0.86  | 0.76  | 0.64  | 0.53  | 0.42  | 0.18  | 0.02  |
| China   | G3960     | 1              | 1.00 | 0.99 | 0.97 | 0.91 | 0.84 | 0.76 | 0.67 | 0.58  | 0.50  | 0.42  | 0.28  | 0.18  | 0.08  | 0.01  | -0.03 | -0.07 | -0.03 |
| China   | G3961     | 1              | 1.00 | 0.99 | 0.95 | 0.89 | 0.81 | 0.71 | 0.61 | 0.51  | 0.42  | 0.34  | 0.21  | 0.12  | 0.05  | 0.01  | -0.01 | 0.00  | 0.03  |
| China   | G3962     | 1              | 1.00 | 0.97 | 0.90 | 0.80 | 0.71 | 0.61 | 0.56 | 0.53  | 0.51  | 0.46  | 0.39  | 0.38  | 0.36  | 0.34  | 0.30  | 0.24  | 0.21  |
| China   | G3965     | 1              | 1.00 | 1.00 | 0.99 | 0.97 | 0.91 | 0.83 | 0.72 | 0.61  | 0.51  | 0.41  | 0.22  | 0.08  | -0.03 | -0.12 | -0.18 | -0.23 | -0.16 |
| China   | G3966     | 1              | 1.00 | 1.00 | 1.00 | 0.98 | 0.95 | 0.89 | 0.82 | 0.74  | 0.66  | 0.58  | 0.43  | 0.32  | 0.24  | 0.16  | 0.08  | 0.01  | -0.05 |
| China   | G3967     | 1              | 1.00 | 1.00 | 1.00 | 0.99 | 0.96 | 0.93 | 0.88 | 0.83  | 0.77  | 0.70  | 0.56  | 0.44  | 0.33  | 0.24  | 0.15  | 0.02  | 0.01  |
| China   | G3968     | 1              | 1.00 | 1.00 | 1.00 | 1.00 | 0.99 | 0.97 | 0.95 | 0.92  | 0.89  | 0.84  | 0.72  | 0.59  | 0.48  | 0.37  | 0.28  | 0.09  | 0.02  |
| China   | G3969     | 1              | 1.00 | 1.00 | 1.00 | 1.00 | 0.99 | 0.97 | 0.95 | 0.91  | 0.86  | 0.79  | 0.66  | 0.53  | 0.40  | 0.29  | 0.18  | -0.03 | -0.15 |
| China   | G3970     | 1              | 1.00 | 1.00 | 1.00 | 0.98 | 0.96 | 0.93 | 0.89 | 0.84  | 0.77  | 0.70  | 0.57  | 0.46  | 0.36  | 0.28  | 0.18  | 0.02  | -0.19 |
| China   | G3971     | 1              | 1.00 | 1.00 | 0.99 | 0.97 | 0.94 | 0.88 | 0.79 | 0.69  | 0.58  | 0.47  | 0.29  | 0.14  | 0.04  | -0.05 | -0.12 | -0.20 | -0.18 |
| China   | G3972     | 1              | 1.00 | 0.98 | 0.94 | 0.86 | 0.78 | 0.69 | 0.59 | 0.51  | 0.44  | 0.36  | 0.24  | 0.14  | 0.05  | 0.00  | -0.04 | -0.06 | -0.03 |
| China   | G3973     | 1              | 1.00 | 0.95 | 0.80 | 0.58 | 0.36 | 0.17 | 0.02 | -0.09 | -0.18 | -0.25 | -0.35 | -0.42 | -0.46 | -0.48 | -0.44 | -0.32 | -0.31 |
| China   | G3974     | 1              | 0.99 | 0.94 | 0.84 | 0.75 | 0.68 | 0.62 | 0.58 | 0.57  | 0.55  | 0.52  | 0.52  | 0.54  | 0.51  | 0.43  | 0.38  | 0.36  | 0.34  |
| China   | G3975     | 1              | 0.99 | 0.96 | 0.91 | 0.86 | 0.80 | 0.74 | 0.67 | 0.62  | 0.58  | 0.56  | 0.50  | 0.43  | 0.38  | 0.35  | 0.32  | 0.26  | 0.20  |
| China   | G3978     | 1              | 1.00 | 1.00 | 0.99 | 0.99 | 0.99 | 0.98 | 0.98 | 0.98  | 0.97  | 0.96  | 0.91  | 0.81  | 0.68  | 0.55  | 0.44  | 0.19  | -0.02 |
| China   | G3979     | 1              | 1.00 | 1.00 | 1.00 | 0.99 | 0.99 | 0.97 | 0.94 | 0.90  | 0.84  | 0.77  | 0.64  | 0.56  | 0.49  | 0.43  | 0.35  | 0.18  | 0.02  |
| China   | G3981     | 1              | 1.00 | 1.00 | 1.00 | 1.00 | 1.00 | 1.00 | 1.00 | 1.00  | 1.00  | 1.00  | 1.00  | 0.99  | 0.99  | 0.99  | 0.98  | 0.96  | 0.92  |
| China   | G3982     | 1              | 0.99 | 0.94 | 0.85 | 0.72 | 0.55 | 0.38 | 0.23 | 0.10  | -0.01 | -0.09 | -0.22 | -0.31 | -0.37 | -0.39 | -0.36 | -0.25 | -0.23 |
| China   | G3983     | 1              | 1.00 | 1.00 | 1.00 | 1.00 | 1.00 | 0.99 | 0.99 | 0.99  | 0.99  | 0.99  | 0.99  | 0.98  | 0.98  | 0.96  | 0.93  | 0.80  | 0.67  |
| China   | G3986     | 1              | 1.00 | 1.00 | 0.99 | 0.98 | 0.96 | 0.93 | 0.90 | 0.87  | 0.83  | 0.78  | 0.68  | 0.59  | 0.50  | 0.41  | 0.32  | 0.16  | 0.07  |
| China   | G3987     | 1              | 1.00 | 0.99 | 0.97 | 0.95 | 0.91 | 0.87 | 0.83 | 0.78  | 0.73  | 0.67  | 0.57  | 0.47  | 0.38  | 0.29  | 0.21  | 0.09  | 0.03  |
| China   | G3989     | 1              | 1.00 | 1.00 | 1.00 | 0.99 | 0.98 | 0.98 | 0.96 | 0.95  | 0.94  | 0.92  | 0.87  | 0.80  | 0.71  | 0.61  | 0.51  | 0.29  | 0.10  |

| Country | GloFAS ID | Station filter | LT1  | LT2  | LT3  | LT4  | LT5  | LT6  | LT7  | LT8  | LT9  | LT10  | LT12  | LT14  | LT16  | LT18  | LT20  | LT25  | L30   |
|---------|-----------|----------------|------|------|------|------|------|------|------|------|------|-------|-------|-------|-------|-------|-------|-------|-------|
| China   | G3990     | 1              | 1.00 | 1.00 | 0.99 | 0.99 | 0.98 | 0.96 | 0.93 | 0.86 | 0.79 | 0.71  | 0.52  | 0.35  | 0.22  | 0.10  | -0.02 | -0.30 | -0.41 |
| China   | G3992     | 1              | 1.00 | 1.00 | 0.99 | 0.95 | 0.89 | 0.80 | 0.70 | 0.60 | 0.52 | 0.45  | 0.31  | 0.23  | 0.19  | 0.13  | 0.09  | 0.01  | 0.05  |
| China   | G3993     | 1              | 1.00 | 1.00 | 0.99 | 0.96 | 0.88 | 0.73 | 0.59 | 0.48 | 0.39 | 0.31  | 0.20  | 0.13  | 0.07  | 0.04  | 0.00  | -0.15 | -0.13 |
| China   | G3994     | 1              | 1.00 | 1.00 | 1.00 | 0.99 | 0.97 | 0.93 | 0.86 | 0.76 | 0.65 | 0.55  | 0.36  | 0.23  | 0.13  | 0.04  | -0.01 | -0.07 | -0.11 |
| China   | G3998     | 1              | 1.00 | 0.99 | 0.97 | 0.91 | 0.76 | 0.59 | 0.46 | 0.36 | 0.27 | 0.20  | 0.10  | 0.04  | -0.01 | -0.03 | -0.08 | -0.21 | -0.16 |
| China   | G3999     | 1              | 1.00 | 1.00 | 1.00 | 0.99 | 0.98 | 0.94 | 0.86 | 0.74 | 0.60 | 0.45  | 0.17  | -0.05 | -0.26 | -0.42 | -0.53 | -0.77 | -0.57 |
| China   | G4000     | 1              | 1.00 | 1.00 | 1.00 | 0.98 | 0.95 | 0.87 | 0.77 | 0.65 | 0.54 | 0.43  | 0.26  | 0.15  | 0.05  | -0.01 | -0.05 | -0.10 | -0.15 |
| China   | G4001     | 1              | 1.00 | 1.00 | 1.00 | 0.99 | 0.95 | 0.89 | 0.79 | 0.67 | 0.56 | 0.45  | 0.28  | 0.16  | 0.06  | -0.01 | -0.05 | -0.10 | -0.15 |
| China   | G4005     | 1              | 1.00 | 1.00 | 1.00 | 0.99 | 0.97 | 0.93 | 0.87 | 0.80 | 0.71 | 0.62  | 0.46  | 0.31  | 0.20  | 0.12  | 0.06  | -0.08 | -0.20 |
| China   | G4006     | 1              | 1.00 | 1.00 | 1.00 | 0.99 | 0.98 | 0.96 | 0.93 | 0.89 | 0.83 | 0.76  | 0.64  | 0.53  | 0.43  | 0.34  | 0.27  | 0.14  | 0.06  |
| China   | G4007     | 1              | 1.00 | 1.00 | 1.00 | 1.00 | 1.00 | 1.00 | 0.99 | 0.99 | 0.97 | 0.95  | 0.87  | 0.78  | 0.67  | 0.57  | 0.47  | 0.23  | 0.06  |
| China   | G4011     | 1              | 1.00 | 1.00 | 1.00 | 0.98 | 0.95 | 0.89 | 0.83 | 0.75 | 0.68 | 0.61  | 0.46  | 0.34  | 0.22  | 0.13  | 0.06  | -0.05 | -0.11 |
| China   | G4018     | 1              | 1.00 | 0.95 | 0.83 | 0.69 | 0.55 | 0.43 | 0.32 | 0.23 | 0.16 | 0.10  | 0.01  | -0.05 | -0.09 | -0.12 | -0.14 | -0.14 | -0.13 |
| China   | G4019     | 1              | 0.99 | 0.96 | 0.92 | 0.88 | 0.84 | 0.79 | 0.74 | 0.69 | 0.66 | 0.65  | 0.59  | 0.55  | 0.53  | 0.50  | 0.48  | 0.41  | 0.37  |
| China   | G4020     | 1              | 1.00 | 0.98 | 0.95 | 0.89 | 0.86 | 0.82 | 0.74 | 0.70 | 0.68 | 0.68  | 0.64  | 0.59  | 0.59  | 0.54  | 0.55  | 0.48  | 0.42  |
| China   | G4023     | 1              | 1.00 | 1.00 | 0.99 | 0.98 | 0.95 | 0.90 | 0.84 | 0.75 | 0.67 | 0.59  | 0.45  | 0.35  | 0.26  | 0.19  | 0.15  | 0.07  | 0.03  |
| China   | G4024     | 1              | 1.00 | 0.98 | 0.95 | 0.90 | 0.87 | 0.83 | 0.76 | 0.71 | 0.68 | 0.67  | 0.62  | 0.57  | 0.55  | 0.52  | 0.50  | 0.44  | 0.37  |
| China   | G4030     | 1              | 1.00 | 1.00 | 0.99 | 0.99 | 0.99 | 0.98 | 0.97 | 0.95 | 0.94 | 0.93  | 0.88  | 0.80  | 0.71  | 0.60  | 0.48  | 0.24  | 0.06  |
| China   | G4031     | 1              | 1.00 | 0.99 | 0.98 | 0.96 | 0.94 | 0.89 | 0.84 | 0.78 | 0.73 | 0.69  | 0.60  | 0.54  | 0.48  | 0.42  | 0.37  | 0.30  | 0.25  |
| China   | G4036     | 1              | 1.00 | 0.98 | 0.96 | 0.93 | 0.88 | 0.80 | 0.74 | 0.66 | 0.57 | 0.54  | 0.45  | 0.39  | 0.33  | 0.32  | 0.27  | 0.25  | 0.17  |
| China   | G4042     | 1              | 0.95 | 0.76 | 0.54 | 0.38 | 0.25 | 0.16 | 0.10 | 0.05 | 0.00 | -0.04 | -0.10 | -0.14 | -0.17 | -0.10 | -0.05 | -0.05 | -0.05 |
| China   | G4043     | 1              | 1.00 | 0.98 | 0.97 | 0.95 | 0.92 | 0.86 | 0.80 | 0.78 | 0.73 | 0.67  | 0.62  | 0.55  | 0.49  | 0.44  | 0.40  | 0.35  | 0.32  |
| China   | G4044     | 1              | 1.00 | 1.00 | 0.98 | 0.96 | 0.94 | 0.90 | 0.86 | 0.82 | 0.80 | 0.75  | 0.66  | 0.59  | 0.54  | 0.48  | 0.42  | 0.33  | 0.30  |
| China   | G4047     | 1              | 1.00 | 0.98 | 0.94 | 0.87 | 0.79 | 0.72 | 0.62 | 0.53 | 0.51 | 0.48  | 0.39  | 0.33  | 0.30  | 0.28  | 0.26  | 0.21  | 0.18  |
| China   | G4054     | 1              | 1.00 | 0.99 | 0.96 | 0.87 | 0.74 | 0.59 | 0.47 | 0.36 | 0.28 | 0.21  | 0.11  | 0.03  | -0.03 | -0.07 | -0.08 | -0.13 | -0.18 |
| China   | G4055     | 1              | 1.00 | 0.98 | 0.90 | 0.78 | 0.63 | 0.47 | 0.34 | 0.22 | 0.13 | 0.05  | -0.06 | -0.13 | -0.19 | -0.24 | -0.24 | -0.26 | -0.35 |
| China   | G4071     | 1              | 1.00 | 1.00 | 0.99 | 0.98 | 0.93 | 0.89 | 0.88 | 0.83 | 0.78 | 0.77  | 0.74  | 0.70  | 0.65  | 0.67  | 0.63  | 0.62  | 0.55  |
| China   | G4074     | 1              | 1.00 | 0.97 | 0.86 | 0.71 | 0.56 | 0.42 | 0.30 | 0.20 | 0.12 | 0.05  | -0.06 | -0.13 | -0.19 | -0.24 | -0.23 | -0.17 | -0.18 |
| China   | G4075     | 1              | 1.00 | 0.99 | 0.97 | 0.89 | 0.82 | 0.77 | 0.66 | 0.57 | 0.53 | 0.51  | 0.41  | 0.31  | 0.26  | 0.21  | 0.18  | 0.15  | 0.12  |
| China   | G4078     | 1              | 0.99 | 0.91 | 0.76 | 0.62 | 0.48 | 0.37 | 0.29 | 0.22 | 0.17 | 0.12  | 0.05  | -0.01 | -0.05 | -0.06 | -0.02 | -0.07 | -0.22 |
| China   | G4080     | 1              | 1.00 | 0.97 | 0.91 | 0.83 | 0.72 | 0.59 | 0.47 | 0.37 | 0.28 | 0.22  | 0.14  | 0.11  | 0.08  | 0.05  | 0.04  | -0.01 | -0.13 |
| China   | G4086     | 1              | 0.94 | 0.73 | 0.51 | 0.38 | 0.29 | 0.22 | 0.17 | 0.13 | 0.09 | 0.05  | 0.00  | -0.03 | -0.03 | -0.16 | -0.23 | -0.26 | -0.24 |
| China   | G4087     | 1              | 0.91 | 0.67 | 0.45 | 0.31 | 0.22 | 0.17 | 0.12 | 0.09 | 0.04 | -0.01 | -0.09 | -0.14 | -0.16 | -0.18 | -0.23 | -0.27 | -0.32 |
| China   | G4096     | 1              | 1.00 | 0.99 | 0.96 | 0.92 | 0.88 | 0.82 | 0.77 | 0.68 | 0.63 | 0.59  | 0.54  | 0.51  | 0.44  | 0.40  | 0.41  | 0.34  | 0.33  |
| China   | G4106     | 1              | 1.00 | 0.99 | 0.97 | 0.92 | 0.84 | 0.73 | 0.61 | 0.48 | 0.35 | 0.23  | 0.02  | -0.14 | -0.27 | -0.37 | -0.42 | -0.34 | -0.20 |
| China   | G4107     | 1              | 0.98 | 0.92 | 0.84 | 0.78 | 0.72 | 0.65 | 0.58 | 0.54 | 0.48 | 0.44  | 0.41  | 0.37  | 0.38  | 0.34  | 0.32  | 0.27  | 0.24  |
| China   | G4108     | 1              | 1.00 | 0.99 | 0.99 | 0.97 | 0.96 | 0.96 | 0.95 | 0.94 | 0.93 | 0.92  | 0.91  | 0.90  | 0.90  | 0.89  | 0.88  | 0.82  | 0.75  |
| China   | G4114     | 1              | 1.00 | 1.00 | 0.99 | 0.98 | 0.97 | 0.94 | 0.91 | 0.86 | 0.80 | 0.74  | 0.64  | 0.54  | 0.45  | 0.36  | 0.28  | 0.18  | 0.14  |
| China   | G4117     | 1              | 1.00 | 1.00 | 0.99 | 0.98 | 0.97 | 0.95 | 0.92 | 0.88 | 0.84 | 0.79  | 0.68  | 0.57  | 0.46  | 0.36  | 0.26  | 0.10  | 0.03  |

| Country | GloFAS ID | Station filter | LT1  | LT2  | LT3  | LT4  | LT5  | LT6  | LT7  | LT8  | LT9   | LT10  | LT12  | LT14  | LT16  | LT18  | LT20  | LT25  | L30   |
|---------|-----------|----------------|------|------|------|------|------|------|------|------|-------|-------|-------|-------|-------|-------|-------|-------|-------|
| China   | G4118     | 1              | 1.00 | 0.99 | 0.99 | 0.98 | 0.98 | 0.97 | 0.96 | 0.94 | 0.92  | 0.90  | 0.83  | 0.74  | 0.64  | 0.53  | 0.42  | 0.19  | 0.01  |
| China   | G4124     | 1              | 1.00 | 1.00 | 0.99 | 0.97 | 0.93 | 0.86 | 0.78 | 0.69 | 0.60  | 0.51  | 0.33  | 0.19  | 0.07  | -0.02 | -0.09 | -0.19 | -0.23 |
| China   | G4129     | 1              | 1.00 | 0.98 | 0.95 | 0.89 | 0.80 | 0.70 | 0.59 | 0.48 | 0.38  | 0.29  | 0.14  | 0.02  | -0.08 | -0.14 | -0.18 | -0.18 | -0.14 |
| China   | G4130     | 1              | 1.00 | 1.00 | 0.98 | 0.94 | 0.89 | 0.83 | 0.77 | 0.73 | 0.69  | 0.65  | 0.60  | 0.57  | 0.53  | 0.50  | 0.51  | 0.55  | 0.53  |
| China   | G4131     | 1              | 1.00 | 0.97 | 0.93 | 0.84 | 0.80 | 0.74 | 0.69 | 0.61 | 0.58  | 0.57  | 0.50  | 0.47  | 0.40  | 0.35  | 0.34  | 0.23  | 0.19  |
| China   | G4132     | 1              | 1.00 | 0.95 | 0.89 | 0.85 | 0.83 | 0.77 | 0.75 | 0.75 | 0.73  | 0.69  | 0.70  | 0.63  | 0.62  | 0.58  | 0.55  | 0.51  | 0.48  |
| China   | G4136     | 1              | 0.99 | 0.94 | 0.87 | 0.79 | 0.71 | 0.61 | 0.57 | 0.57 | 0.54  | 0.47  | 0.45  | 0.34  | 0.32  | 0.27  | 0.24  | 0.23  | 0.23  |
| China   | G4139     | 1              | 0.99 | 0.93 | 0.79 | 0.60 | 0.42 | 0.27 | 0.15 | 0.06 | -0.02 | -0.09 | -0.18 | -0.25 | -0.31 | -0.28 | -0.18 | -0.04 | 0.00  |
| China   | G4144     | 1              | 1.00 | 0.99 | 0.97 | 0.94 | 0.91 | 0.89 | 0.86 | 0.84 | 0.82  | 0.80  | 0.77  | 0.73  | 0.70  | 0.67  | 0.66  | 0.62  | 0.59  |
| China   | G4156     | 1              | 0.99 | 0.96 | 0.90 | 0.83 | 0.75 | 0.67 | 0.60 | 0.53 | 0.46  | 0.41  | 0.31  | 0.24  | 0.18  | 0.15  | 0.14  | 0.11  | 0.11  |
| China   | G4162     | 1              | 0.99 | 0.97 | 0.93 | 0.88 | 0.83 | 0.77 | 0.75 | 0.69 | 0.66  | 0.64  | 0.59  | 0.55  | 0.50  | 0.48  | 0.44  | 0.38  | 0.33  |
| China   | G4168     | 1              | 0.99 | 0.96 | 0.91 | 0.84 | 0.78 | 0.72 | 0.66 | 0.63 | 0.59  | 0.54  | 0.51  | 0.44  | 0.41  | 0.38  | 0.35  | 0.30  | 0.29  |
| China   | G4174     | 1              | 0.99 | 0.96 | 0.90 | 0.82 | 0.77 | 0.70 | 0.65 | 0.62 | 0.57  | 0.53  | 0.47  | 0.41  | 0.38  | 0.35  | 0.33  | 0.30  | 0.29  |
| China   | G4180     | 1              | 1.00 | 0.99 | 0.98 | 0.98 | 0.97 | 0.97 | 0.96 | 0.95 | 0.95  | 0.93  | 0.92  | 0.90  | 0.88  | 0.87  | 0.86  | 0.83  | 0.81  |
| China   | G4182     | 1              | 0.99 | 0.95 | 0.91 | 0.86 | 0.80 | 0.75 | 0.70 | 0.65 | 0.61  | 0.58  | 0.52  | 0.47  | 0.42  | 0.38  | 0.37  | 0.38  | 0.38  |
| China   | G4183     | 1              | 0.99 | 0.97 | 0.91 | 0.84 | 0.76 | 0.70 | 0.62 | 0.55 | 0.50  | 0.45  | 0.37  | 0.32  | 0.27  | 0.23  | 0.22  | 0.16  | 0.15  |
| China   | G4184     | 1              | 0.98 | 0.95 | 0.90 | 0.85 | 0.79 | 0.75 | 0.70 | 0.66 | 0.64  | 0.62  | 0.58  | 0.54  | 0.51  | 0.50  | 0.47  | 0.44  | 0.41  |
| China   | G4185     | 1              | 1.00 | 0.98 | 0.95 | 0.93 | 0.90 | 0.83 | 0.78 | 0.73 | 0.70  | 0.64  | 0.59  | 0.55  | 0.49  | 0.43  | 0.40  | 0.32  | 0.27  |
| China   | G4186     | 1              | 1.00 | 0.99 | 0.98 | 0.97 | 0.96 | 0.94 | 0.91 | 0.90 | 0.88  | 0.87  | 0.85  | 0.82  | 0.80  | 0.78  | 0.76  | 0.71  | 0.66  |
| China   | G4193     | 1              | 0.99 | 0.98 | 0.95 | 0.89 | 0.84 | 0.78 | 0.70 | 0.62 | 0.55  | 0.50  | 0.41  | 0.33  | 0.29  | 0.24  | 0.21  | 0.15  | 0.14  |
| China   | G4194     | 1              | 0.99 | 0.98 | 0.95 | 0.90 | 0.85 | 0.80 | 0.72 | 0.65 | 0.58  | 0.52  | 0.43  | 0.36  | 0.31  | 0.26  | 0.23  | 0.16  | 0.15  |
| China   | G4203     | 1              | 1.00 | 0.99 | 0.97 | 0.92 | 0.89 | 0.85 | 0.80 | 0.74 | 0.72  | 0.69  | 0.61  | 0.57  | 0.51  | 0.46  | 0.43  | 0.32  | 0.28  |
| China   | G4205     | 1              | 0.97 | 0.88 | 0.79 | 0.71 | 0.62 | 0.53 | 0.45 | 0.39 | 0.35  | 0.31  | 0.25  | 0.21  | 0.17  | 0.15  | 0.14  | 0.13  | 0.12  |
| China   | G4211     | 1              | 1.00 | 0.98 | 0.95 | 0.88 | 0.79 | 0.71 | 0.66 | 0.63 | 0.58  | 0.55  | 0.53  | 0.47  | 0.45  | 0.43  | 0.39  | 0.36  | 0.33  |
| China   | G4218     | 1              | 1.00 | 0.99 | 0.98 | 0.94 | 0.88 | 0.81 | 0.73 | 0.66 | 0.61  | 0.56  | 0.49  | 0.45  | 0.42  | 0.38  | 0.36  | 0.32  | 0.31  |
| China   | G4227     | 1              | 0.99 | 0.92 | 0.82 | 0.70 | 0.61 | 0.53 | 0.47 | 0.41 | 0.37  | 0.33  | 0.24  | 0.17  | 0.12  | 0.07  | 0.05  | -0.01 | -0.04 |
| China   | G4228     | 1              | 1.00 | 0.98 | 0.94 | 0.87 | 0.80 | 0.71 | 0.63 | 0.56 | 0.49  | 0.44  | 0.33  | 0.26  | 0.19  | 0.15  | 0.13  | 0.11  | 0.07  |
| China   | G4246     | 1              | 0.99 | 0.97 | 0.94 | 0.89 | 0.85 | 0.79 | 0.75 | 0.71 | 0.66  | 0.62  | 0.56  | 0.52  | 0.49  | 0.48  | 0.44  | 0.40  | 0.35  |
| China   | G4247     | 1              | 0.99 | 0.99 | 0.98 | 0.97 | 0.96 | 0.95 | 0.93 | 0.90 | 0.87  | 0.84  | 0.78  | 0.74  | 0.69  | 0.65  | 0.61  | 0.54  | 0.48  |
| China   | G4249     | 1              | 1.00 | 0.99 | 0.99 | 0.98 | 0.96 | 0.93 | 0.90 | 0.87 | 0.84  | 0.81  | 0.76  | 0.69  | 0.64  | 0.60  | 0.58  | 0.51  | 0.47  |
| China   | G4252     | 1              | 1.00 | 0.98 | 0.97 | 0.93 | 0.88 | 0.84 | 0.81 | 0.75 | 0.70  | 0.67  | 0.58  | 0.53  | 0.48  | 0.46  | 0.44  | 0.39  | 0.34  |
| China   | G4254     | 1              | 1.00 | 0.99 | 0.96 | 0.90 | 0.84 | 0.79 | 0.72 | 0.67 | 0.61  | 0.55  | 0.44  | 0.37  | 0.32  | 0.29  | 0.26  | 0.22  | 0.19  |
| China   | G4255     | 1              | 1.00 | 0.99 | 0.98 | 0.97 | 0.94 | 0.91 | 0.88 | 0.85 | 0.81  | 0.78  | 0.73  | 0.66  | 0.62  | 0.59  | 0.56  | 0.50  | 0.47  |
| China   | G4261     | 1              | 0.97 | 0.84 | 0.72 | 0.61 | 0.51 | 0.45 | 0.41 | 0.37 | 0.33  | 0.31  | 0.24  | 0.23  | 0.19  | 0.19  | 0.17  | 0.16  | 0.14  |
| China   | G4262     | 1              | 0.98 | 0.92 | 0.84 | 0.76 | 0.68 | 0.61 | 0.57 | 0.51 | 0.47  | 0.44  | 0.39  | 0.37  | 0.32  | 0.32  | 0.29  | 0.25  | 0.22  |
| China   | G4267     | 1              | 1.00 | 0.99 | 0.96 | 0.92 | 0.85 | 0.80 | 0.75 | 0.68 | 0.62  | 0.57  | 0.46  | 0.39  | 0.33  | 0.30  | 0.27  | 0.23  | 0.19  |
| China   | G4268     | 1              | 1.00 | 0.99 | 0.95 | 0.92 | 0.88 | 0.84 | 0.79 | 0.76 | 0.74  | 0.70  | 0.66  | 0.61  | 0.58  | 0.55  | 0.55  | 0.51  | 0.50  |
| China   | G4269     | 1              | 1.00 | 1.00 | 0.99 | 0.98 | 0.96 | 0.93 | 0.88 | 0.83 | 0.79  | 0.74  | 0.67  | 0.61  | 0.57  | 0.51  | 0.50  | 0.43  | 0.42  |
| China   | G4272     | 1              | 0.99 | 0.96 | 0.90 | 0.84 | 0.79 | 0.74 | 0.69 | 0.66 | 0.64  | 0.60  | 0.55  | 0.50  | 0.50  | 0.48  | 0.47  | 0.43  | 0.39  |

| Country | GloFAS ID | Station filter | LT1  | LT2  | LT3  | LT4  | LT5  | LT6  | LT7  | LT8   | LT9   | LT10  | LT12  | LT14  | LT16  | LT18  | LT20  | LT25  | L30   |
|---------|-----------|----------------|------|------|------|------|------|------|------|-------|-------|-------|-------|-------|-------|-------|-------|-------|-------|
| China   | G4273     | 1              | 1.00 | 0.99 | 0.97 | 0.93 | 0.88 | 0.84 | 0.81 | 0.77  | 0.73  | 0.71  | 0.65  | 0.59  | 0.56  | 0.54  | 0.52  | 0.49  | 0.45  |
| China   | G4275     | 1              | 0.98 | 0.91 | 0.83 | 0.74 | 0.65 | 0.56 | 0.47 | 0.40  | 0.35  | 0.29  | 0.22  | 0.15  | 0.11  | 0.05  | 0.03  | -0.04 | -0.05 |
| China   | G4276     | 1              | 0.98 | 0.92 | 0.86 | 0.81 | 0.74 | 0.67 | 0.62 | 0.56  | 0.50  | 0.45  | 0.38  | 0.34  | 0.31  | 0.28  | 0.26  | 0.23  | 0.20  |
| China   | G4277     | 1              | 1.00 | 1.00 | 1.00 | 0.99 | 0.99 | 0.99 | 0.99 | 0.98  | 0.98  | 0.97  | 0.96  | 0.94  | 0.92  | 0.90  | 0.87  | 0.80  | 0.72  |
| China   | G4279     | 1              | 1.00 | 1.00 | 1.00 | 1.00 | 0.99 | 0.99 | 0.98 | 0.98  | 0.97  | 0.97  | 0.95  | 0.93  | 0.90  | 0.87  | 0.83  | 0.73  | 0.62  |
| China   | G4284     | 1              | 0.93 | 0.76 | 0.60 | 0.47 | 0.38 | 0.32 | 0.27 | 0.22  | 0.18  | 0.16  | 0.11  | 0.07  | 0.05  | 0.09  | 0.12  | 0.13  | 0.11  |
| China   | G4285     | 1              | 1.00 | 0.99 | 0.97 | 0.95 | 0.93 | 0.89 | 0.85 | 0.82  | 0.79  | 0.76  | 0.73  | 0.67  | 0.65  | 0.63  | 0.62  | 0.57  | 0.51  |
| China   | G4286     | 1              | 0.99 | 0.96 | 0.92 | 0.87 | 0.82 | 0.77 | 0.72 | 0.69  | 0.66  | 0.63  | 0.57  | 0.54  | 0.50  | 0.48  | 0.48  | 0.47  | 0.46  |
| China   | G4289     | 1              | 0.99 | 0.96 | 0.93 | 0.89 | 0.83 | 0.75 | 0.66 | 0.58  | 0.50  | 0.43  | 0.31  | 0.22  | 0.14  | 0.08  | 0.04  | -0.01 | -0.05 |
| China   | G4290     | 1              | 0.94 | 0.83 | 0.71 | 0.60 | 0.51 | 0.43 | 0.36 | 0.31  | 0.26  | 0.23  | 0.18  | 0.13  | 0.10  | 0.11  | 0.12  | 0.09  | 0.05  |
| China   | G4291     | 1              | 0.95 | 0.86 | 0.76 | 0.65 | 0.56 | 0.49 | 0.42 | 0.36  | 0.32  | 0.29  | 0.24  | 0.19  | 0.16  | 0.15  | 0.16  | 0.16  | 0.14  |
| China   | G4296     | 1              | 0.97 | 0.87 | 0.73 | 0.60 | 0.48 | 0.38 | 0.30 | 0.23  | 0.17  | 0.12  | 0.04  | -0.03 | -0.08 | -0.11 | -0.12 | -0.17 | -0.21 |
| China   | G4304     | 1              | 0.99 | 0.95 | 0.90 | 0.84 | 0.77 | 0.69 | 0.61 | 0.53  | 0.46  | 0.40  | 0.28  | 0.19  | 0.12  | 0.09  | 0.12  | 0.13  | 0.09  |
| China   | G4311     | 1              | 0.99 | 0.98 | 0.96 | 0.93 | 0.91 | 0.88 | 0.86 | 0.84  | 0.82  | 0.80  | 0.76  | 0.72  | 0.68  | 0.65  | 0.61  | 0.54  | 0.47  |
| China   | G4312     | 1              | 1.00 | 1.00 | 1.00 | 0.99 | 0.99 | 0.99 | 0.98 | 0.98  | 0.97  | 0.96  | 0.94  | 0.92  | 0.88  | 0.84  | 0.80  | 0.68  | 0.58  |
| China   | G4318     | 1              | 0.99 | 0.92 | 0.83 | 0.73 | 0.64 | 0.57 | 0.49 | 0.42  | 0.36  | 0.31  | 0.22  | 0.15  | 0.09  | 0.08  | 0.08  | 0.06  | 0.03  |
| China   | G4322     | 1              | 0.99 | 0.96 | 0.93 | 0.88 | 0.83 | 0.77 | 0.70 | 0.63  | 0.55  | 0.48  | 0.37  | 0.27  | 0.21  | 0.16  | 0.13  | 0.13  | 0.12  |
| China   | G4323     | 1              | 0.99 | 0.94 | 0.87 | 0.79 | 0.73 | 0.68 | 0.62 | 0.56  | 0.54  | 0.49  | 0.43  | 0.39  | 0.38  | 0.32  | 0.32  | 0.29  | 0.28  |
| China   | G4331     | 1              | 0.98 | 0.90 | 0.81 | 0.74 | 0.67 | 0.62 | 0.56 | 0.51  | 0.48  | 0.44  | 0.36  | 0.33  | 0.29  | 0.26  | 0.27  | 0.23  | 0.20  |
| China   | G4345     | 1              | 0.98 | 0.93 | 0.88 | 0.82 | 0.76 | 0.70 | 0.65 | 0.62  | 0.57  | 0.55  | 0.51  | 0.46  | 0.44  | 0.44  | 0.44  | 0.41  | 0.39  |
| China   | G4351     | 1              | 1.00 | 0.99 | 0.99 | 0.99 | 0.98 | 0.97 | 0.96 | 0.94  | 0.92  | 0.90  | 0.84  | 0.79  | 0.74  | 0.70  | 0.66  | 0.62  | 0.57  |
| China   | G4353     | 1              | 1.00 | 0.99 | 0.97 | 0.96 | 0.94 | 0.92 | 0.88 | 0.85  | 0.81  | 0.78  | 0.71  | 0.63  | 0.56  | 0.51  | 0.45  | 0.36  | 0.30  |
| China   | G4354     | 1              | 1.00 | 0.99 | 0.97 | 0.96 | 0.95 | 0.93 | 0.91 | 0.89  | 0.86  | 0.84  | 0.79  | 0.73  | 0.70  | 0.66  | 0.63  | 0.58  | 0.54  |
| China   | G4356     | 1              | 0.98 | 0.93 | 0.89 | 0.87 | 0.83 | 0.79 | 0.78 | 0.76  | 0.73  | 0.72  | 0.68  | 0.65  | 0.60  | 0.59  | 0.55  | 0.51  | 0.44  |
| China   | G4357     | 1              | 1.00 | 1.00 | 1.00 | 0.99 | 0.99 | 0.98 | 0.97 | 0.96  | 0.95  | 0.93  | 0.89  | 0.84  | 0.79  | 0.73  | 0.67  | 0.55  | 0.46  |
| China   | G4359     | 1              | 0.94 | 0.81 | 0.68 | 0.58 | 0.49 | 0.42 | 0.34 | 0.28  | 0.24  | 0.19  | 0.11  | 0.05  | 0.02  | 0.01  | 0.03  | 0.01  | -0.01 |
| China   | G4360     | 1              | 0.92 | 0.79 | 0.68 | 0.60 | 0.53 | 0.47 | 0.41 | 0.35  | 0.29  | 0.25  | 0.13  | 0.07  | -0.01 | -0.17 | -0.29 | -0.29 | -0.28 |
| China   | G4361     | 1              | 0.98 | 0.92 | 0.83 | 0.75 | 0.68 | 0.61 | 0.55 | 0.49  | 0.43  | 0.38  | 0.28  | 0.18  | 0.12  | 0.10  | 0.10  | 0.06  | 0.05  |
| China   | G4362     | 1              | 0.87 | 0.60 | 0.40 | 0.28 | 0.21 | 0.16 | 0.12 | 0.08  | 0.05  | 0.02  | -0.03 | -0.07 | -0.09 | -0.12 | -0.17 | -0.26 | -0.36 |
| China   | G4363     | 1              | 1.00 | 0.99 | 0.97 | 0.93 | 0.88 | 0.84 | 0.79 | 0.75  | 0.70  | 0.64  | 0.54  | 0.46  | 0.40  | 0.34  | 0.30  | 0.24  | 0.20  |
| China   | G4364     | 1              | 1.00 | 0.99 | 0.97 | 0.93 | 0.88 | 0.82 | 0.77 | 0.72  | 0.67  | 0.62  | 0.53  | 0.47  | 0.41  | 0.38  | 0.35  | 0.31  | 0.26  |
| China   | G4368     | 1              | 0.99 | 0.97 | 0.91 | 0.83 | 0.76 | 0.69 | 0.62 | 0.54  | 0.47  | 0.42  | 0.33  | 0.27  | 0.20  | 0.18  | 0.15  | 0.12  | 0.07  |
| China   | G4369     | 1              | 0.97 | 0.93 | 0.85 | 0.74 | 0.63 | 0.52 | 0.42 | 0.34  | 0.26  | 0.18  | 0.02  | -0.13 | -0.27 | -0.39 | -0.47 | -0.52 | -0.51 |
| China   | G4372     | 1              | 1.00 | 0.99 | 0.98 | 0.95 | 0.91 | 0.86 | 0.81 | 0.76  | 0.72  | 0.67  | 0.57  | 0.48  | 0.42  | 0.35  | 0.31  | 0.26  | 0.21  |
| China   | G4374     | 1              | 0.95 | 0.79 | 0.64 | 0.53 | 0.43 | 0.33 | 0.29 | 0.25  | 0.18  | 0.14  | 0.08  | 0.04  | 0.01  | -0.04 | -0.08 | -0.10 | -0.07 |
| China   | G4375     | 1              | 0.99 | 0.90 | 0.74 | 0.61 | 0.50 | 0.37 | 0.30 | 0.27  | 0.21  | 0.14  | 0.04  | -0.01 | -0.03 | -0.06 | -0.09 | -0.12 | -0.14 |
| China   | G4376     | 1              | 0.98 | 0.94 | 0.90 | 0.86 | 0.82 | 0.79 | 0.76 | 0.73  | 0.70  | 0.67  | 0.62  | 0.57  | 0.52  | 0.47  | 0.42  | 0.35  | 0.26  |
| China   | G4377     | 1              | 0.95 | 0.82 | 0.62 | 0.42 | 0.28 | 0.16 | 0.05 | -0.06 | -0.16 | -0.24 | -0.39 | -0.51 | -0.60 | -0.67 | -0.73 | -0.71 | -0.72 |
| China   | G4378     | 1              | 0.99 | 0.89 | 0.75 | 0.64 | 0.57 | 0.50 | 0.42 | 0.33  | 0.28  | 0.22  | 0.09  | 0.00  | -0.10 | -0.15 | -0.18 | -0.16 | -0.15 |

| Country | GloFAS ID | Station filter | LT1  | LT2  | LT3  | LT4  | LT5  | LT6  | LT7   | LT8   | LT9   | LT10  | LT12  | LT14  | LT16  | LT18  | LT20  | LT25  | L30   |
|---------|-----------|----------------|------|------|------|------|------|------|-------|-------|-------|-------|-------|-------|-------|-------|-------|-------|-------|
| China   | G4379     | 1              | 1.00 | 0.99 | 0.97 | 0.93 | 0.88 | 0.83 | 0.78  | 0.73  | 0.68  | 0.63  | 0.53  | 0.46  | 0.39  | 0.36  | 0.32  | 0.28  | 0.23  |
| China   | G4380     | 1              | 0.99 | 0.98 | 0.96 | 0.95 | 0.94 | 0.92 | 0.91  | 0.90  | 0.88  | 0.87  | 0.86  | 0.83  | 0.81  | 0.80  | 0.78  | 0.72  | 0.67  |
| China   | G4386     | 1              | 0.98 | 0.92 | 0.83 | 0.72 | 0.61 | 0.50 | 0.40  | 0.32  | 0.25  | 0.19  | 0.08  | 0.00  | -0.05 | -0.04 | 0.00  | 0.09  | 0.08  |
| China   | G4387     | 1              | 1.00 | 0.99 | 0.97 | 0.93 | 0.86 | 0.80 | 0.74  | 0.69  | 0.65  | 0.60  | 0.49  | 0.40  | 0.32  | 0.26  | 0.21  | 0.16  | 0.10  |
| China   | G4388     | 1              | 1.00 | 1.00 | 1.00 | 0.99 | 0.98 | 0.96 | 0.95  | 0.93  | 0.90  | 0.87  | 0.81  | 0.75  | 0.67  | 0.60  | 0.54  | 0.42  | 0.36  |
| China   | G4389     | 1              | 0.99 | 0.96 | 0.92 | 0.87 | 0.81 | 0.76 | 0.73  | 0.69  | 0.65  | 0.62  | 0.54  | 0.48  | 0.45  | 0.40  | 0.36  | 0.28  | 0.21  |
| China   | G4394     | 1              | 0.98 | 0.88 | 0.74 | 0.59 | 0.47 | 0.36 | 0.27  | 0.21  | 0.15  | 0.09  | 0.01  | -0.09 | -0.15 | -0.18 | -0.16 | -0.09 | -0.10 |
| China   | G4395     | 1              | 0.99 | 0.96 | 0.88 | 0.75 | 0.62 | 0.49 | 0.38  | 0.29  | 0.21  | 0.14  | 0.03  | -0.06 | -0.13 | -0.17 | -0.16 | -0.03 | -0.02 |
| China   | G4396     | 1              | 0.97 | 0.91 | 0.82 | 0.73 | 0.64 | 0.56 | 0.48  | 0.41  | 0.34  | 0.26  | 0.10  | -0.05 | -0.18 | -0.28 | -0.34 | -0.37 | -0.34 |
| China   | G4400     | 1              | 0.98 | 0.94 | 0.89 | 0.84 | 0.79 | 0.75 | 0.72  | 0.69  | 0.67  | 0.64  | 0.59  | 0.53  | 0.47  | 0.43  | 0.39  | 0.24  | 0.09  |
| China   | G4401     | 1              | 0.99 | 0.96 | 0.92 | 0.83 | 0.72 | 0.60 | 0.49  | 0.39  | 0.31  | 0.23  | 0.11  | 0.02  | -0.05 | -0.09 | -0.11 | -0.02 | -0.01 |
| China   | G4406     | 1              | 0.99 | 0.95 | 0.91 | 0.86 | 0.82 | 0.78 | 0.76  | 0.73  | 0.70  | 0.68  | 0.64  | 0.61  | 0.58  | 0.56  | 0.54  | 0.49  | 0.45  |
| China   | G4407     | 1              | 1.00 | 1.00 | 0.99 | 0.98 | 0.97 | 0.94 | 0.91  | 0.88  | 0.84  | 0.81  | 0.73  | 0.67  | 0.61  | 0.57  | 0.53  | 0.45  | 0.38  |
| China   | G4410     | 1              | 0.99 | 0.96 | 0.91 | 0.85 | 0.78 | 0.72 | 0.65  | 0.61  | 0.57  | 0.54  | 0.48  | 0.42  | 0.36  | 0.32  | 0.29  | 0.20  | 0.11  |
| China   | G4411     | 1              | 1.00 | 0.99 | 0.98 | 0.96 | 0.92 | 0.88 | 0.85  | 0.81  | 0.77  | 0.73  | 0.68  | 0.61  | 0.55  | 0.49  | 0.43  | 0.32  | 0.23  |
| China   | G4412     | 1              | 1.00 | 1.00 | 1.00 | 1.00 | 0.99 | 0.99 | 0.98  | 0.97  | 0.95  | 0.94  | 0.90  | 0.85  | 0.81  | 0.76  | 0.71  | 0.58  | 0.47  |
| China   | G4413     | 1              | 1.00 | 0.99 | 0.98 | 0.97 | 0.95 | 0.93 | 0.91  | 0.89  | 0.86  | 0.83  | 0.76  | 0.69  | 0.63  | 0.58  | 0.54  | 0.44  | 0.36  |
| China   | G4417     | 1              | 1.00 | 0.97 | 0.92 | 0.85 | 0.77 | 0.71 | 0.66  | 0.60  | 0.55  | 0.49  | 0.38  | 0.30  | 0.21  | 0.16  | 0.12  | 0.09  | 0.04  |
| China   | G4418     | 1              | 1.00 | 0.98 | 0.94 | 0.88 | 0.81 | 0.74 | 0.69  | 0.64  | 0.58  | 0.53  | 0.42  | 0.34  | 0.25  | 0.20  | 0.16  | 0.12  | 0.07  |
| China   | G4420     | 1              | 0.99 | 0.94 | 0.83 | 0.71 | 0.62 | 0.54 | 0.47  | 0.41  | 0.35  | 0.30  | 0.20  | 0.14  | 0.07  | 0.03  | -0.01 | -0.04 | -0.08 |
| China   | G4421     | 1              | 0.98 | 0.93 | 0.87 | 0.80 | 0.74 | 0.69 | 0.64  | 0.61  | 0.58  | 0.55  | 0.48  | 0.43  | 0.39  | 0.34  | 0.30  | 0.22  | 0.18  |
| China   | G4422     | 1              | 1.00 | 0.99 | 0.98 | 0.96 | 0.94 | 0.92 | 0.91  | 0.88  | 0.86  | 0.84  | 0.80  | 0.76  | 0.72  | 0.69  | 0.65  | 0.55  | 0.47  |
| China   | G4424     | 1              | 0.99 | 0.97 | 0.92 | 0.86 | 0.80 | 0.74 | 0.68  | 0.62  | 0.56  | 0.50  | 0.36  | 0.25  | 0.16  | 0.11  | 0.09  | 0.07  | 0.03  |
| China   | G4426     | 1              | 1.00 | 0.99 | 0.98 | 0.96 | 0.93 | 0.90 | 0.87  | 0.83  | 0.80  | 0.77  | 0.71  | 0.65  | 0.61  | 0.57  | 0.54  | 0.46  | 0.39  |
| China   | G4428     | 1              | 0.97 | 0.86 | 0.72 | 0.57 | 0.50 | 0.46 | 0.40  | 0.34  | 0.32  | 0.29  | 0.23  | 0.22  | 0.19  | 0.16  | 0.17  | 0.12  | 0.10  |
| China   | G4429     | 1              | 0.99 | 0.95 | 0.88 | 0.78 | 0.69 | 0.61 | 0.53  | 0.46  | 0.40  | 0.34  | 0.25  | 0.18  | 0.13  | 0.10  | 0.09  | 0.07  | 0.02  |
| China   | G4430     | 1              | 0.85 | 0.63 | 0.41 | 0.24 | 0.13 | 0.06 | -0.01 | -0.05 | -0.08 | -0.11 | -0.18 | -0.19 | -0.21 | -0.19 | -0.16 | -0.18 | -0.22 |
| China   | G4431     | 1              | 0.99 | 0.96 | 0.92 | 0.87 | 0.82 | 0.78 | 0.74  | 0.69  | 0.66  | 0.62  | 0.56  | 0.50  | 0.44  | 0.36  | 0.31  | 0.20  | 0.12  |
| China   | G4434     | 1              | 1.00 | 0.98 | 0.95 | 0.92 | 0.88 | 0.84 | 0.80  | 0.75  | 0.71  | 0.68  | 0.61  | 0.54  | 0.48  | 0.43  | 0.37  | 0.28  | 0.22  |
| China   | G4443     | 1              | 0.98 | 0.92 | 0.83 | 0.71 | 0.60 | 0.51 | 0.43  | 0.36  | 0.31  | 0.26  | 0.16  | 0.08  | 0.02  | 0.01  | 0.02  | 0.00  | -0.02 |
| China   | G4447     | 1              | 0.98 | 0.92 | 0.81 | 0.67 | 0.55 | 0.46 | 0.37  | 0.30  | 0.24  | 0.19  | 0.10  | 0.05  | 0.01  | 0.03  | 0.07  | 0.04  | 0.00  |
| China   | G4451     | 1              | 0.89 | 0.73 | 0.58 | 0.47 | 0.42 | 0.37 | 0.31  | 0.27  | 0.25  | 0.21  | 0.14  | 0.11  | 0.08  | 0.08  | 0.09  | 0.01  | -0.01 |
| China   | G4462     | 1              | 0.99 | 0.96 | 0.91 | 0.84 | 0.74 | 0.64 | 0.54  | 0.45  | 0.37  | 0.30  | 0.19  | 0.10  | 0.04  | 0.01  | 0.00  | -0.01 | -0.06 |
| China   | G4466     | 1              | 0.98 | 0.93 | 0.86 | 0.80 | 0.74 | 0.68 | 0.61  | 0.54  | 0.47  | 0.39  | 0.26  | 0.15  | 0.08  | 0.05  | 0.04  | 0.03  | -0.01 |
| China   | G4468     | 1              | 0.97 | 0.92 | 0.85 | 0.78 | 0.72 | 0.66 | 0.62  | 0.57  | 0.52  | 0.48  | 0.41  | 0.35  | 0.31  | 0.27  | 0.23  | 0.15  | 0.13  |
| China   | G4488     | 1              | 0.97 | 0.91 | 0.84 | 0.76 | 0.65 | 0.55 | 0.46  | 0.37  | 0.29  | 0.23  | 0.12  | 0.05  | -0.02 | -0.04 | -0.01 | 0.00  | -0.05 |
| China   | G4489     | 1              | 1.00 | 0.99 | 0.97 | 0.94 | 0.89 | 0.85 | 0.80  | 0.75  | 0.71  | 0.67  | 0.59  | 0.53  | 0.47  | 0.43  | 0.39  | 0.29  | 0.25  |
| China   | G4490     | 1              | 1.00 | 0.99 | 0.97 | 0.93 | 0.87 | 0.81 | 0.77  | 0.71  | 0.66  | 0.62  | 0.55  | 0.48  | 0.43  | 0.40  | 0.36  | 0.30  | 0.26  |
| China   | G4493     | 1              | 0.99 | 0.94 | 0.87 | 0.81 | 0.76 | 0.72 | 0.68  | 0.65  | 0.60  | 0.55  | 0.49  | 0.44  | 0.41  | 0.36  | 0.33  | 0.27  | 0.23  |



| Country | GloFAS ID | Station filter | LT1  | LT2  | LT3  | LT4  | LT5  | LT6  | LT7  | LT8  | LT9  | LT10  | LT12  | LT14  | LT16  | LT18  | LT20  | LT25  | L30   |
|---------|-----------|----------------|------|------|------|------|------|------|------|------|------|-------|-------|-------|-------|-------|-------|-------|-------|
| China   | G4497     | 1              | 0.96 | 0.89 | 0.82 | 0.75 | 0.66 | 0.57 | 0.49 | 0.41 | 0.34 | 0.28  | 0.18  | 0.11  | 0.05  | 0.03  | 0.03  | 0.01  | -0.05 |
| China   | G4498     | 1              | 0.99 | 0.95 | 0.89 | 0.83 | 0.78 | 0.74 | 0.71 | 0.67 | 0.64 | 0.60  | 0.53  | 0.47  | 0.44  | 0.40  | 0.37  | 0.29  | 0.25  |
| China   | G4503     | 1              | 0.98 | 0.94 | 0.89 | 0.84 | 0.78 | 0.72 | 0.64 | 0.55 | 0.47 | 0.40  | 0.26  | 0.16  | 0.09  | 0.04  | 0.03  | 0.01  | -0.04 |
| China   | G4504     | 1              | 0.98 | 0.94 | 0.88 | 0.82 | 0.77 | 0.73 | 0.69 | 0.66 | 0.63 | 0.60  | 0.54  | 0.48  | 0.44  | 0.40  | 0.37  | 0.30  | 0.27  |
| China   | G4505     | 1              | 0.99 | 0.96 | 0.90 | 0.85 | 0.80 | 0.76 | 0.72 | 0.69 | 0.66 | 0.62  | 0.55  | 0.49  | 0.45  | 0.41  | 0.38  | 0.30  | 0.26  |
| China   | G4515     | 1              | 0.98 | 0.94 | 0.88 | 0.82 | 0.76 | 0.70 | 0.62 | 0.55 | 0.46 | 0.39  | 0.25  | 0.15  | 0.07  | 0.03  | 0.01  | 0.02  | -0.03 |
| China   | G4518     | 1              | 0.91 | 0.71 | 0.53 | 0.43 | 0.35 | 0.29 | 0.26 | 0.23 | 0.19 | 0.15  | 0.12  | 0.09  | 0.07  | 0.10  | 0.11  | 0.12  | 0.11  |
| China   | G4570     | 1              | 1.00 | 0.98 | 0.95 | 0.92 | 0.89 | 0.85 | 0.81 | 0.76 | 0.71 | 0.66  | 0.56  | 0.47  | 0.38  | 0.30  | 0.22  | 0.06  | -0.05 |
| China   | G4571     | 1              | 0.99 | 0.95 | 0.91 | 0.86 | 0.80 | 0.73 | 0.67 | 0.60 | 0.54 | 0.49  | 0.39  | 0.31  | 0.24  | 0.17  | 0.11  | -0.02 | -0.08 |
| China   | G4572     | 1              | 0.99 | 0.94 | 0.87 | 0.79 | 0.72 | 0.66 | 0.61 | 0.57 | 0.53 | 0.49  | 0.43  | 0.36  | 0.31  | 0.27  | 0.24  | 0.18  | 0.17  |
| China   | G4573     | 1              | 0.99 | 0.97 | 0.94 | 0.90 | 0.87 | 0.83 | 0.80 | 0.75 | 0.71 | 0.66  | 0.57  | 0.48  | 0.40  | 0.32  | 0.25  | 0.10  | 0.01  |
| China   | G4574     | 1              | 0.99 | 0.98 | 0.96 | 0.94 | 0.91 | 0.88 | 0.84 | 0.78 | 0.72 | 0.66  | 0.53  | 0.42  | 0.31  | 0.23  | 0.18  | 0.13  | 0.11  |
| China   | G4575     | 1              | 0.99 | 0.96 | 0.91 | 0.86 | 0.81 | 0.77 | 0.71 | 0.67 | 0.63 | 0.59  | 0.52  | 0.44  | 0.38  | 0.31  | 0.25  | 0.18  | 0.14  |
| China   | G4579     | 1              | 0.99 | 0.97 | 0.92 | 0.87 | 0.82 | 0.78 | 0.72 | 0.68 | 0.64 | 0.60  | 0.52  | 0.45  | 0.39  | 0.33  | 0.27  | 0.18  | 0.13  |
| China   | G4583     | 1              | 0.97 | 0.92 | 0.87 | 0.81 | 0.76 | 0.71 | 0.67 | 0.63 | 0.59 | 0.57  | 0.52  | 0.47  | 0.43  | 0.40  | 0.38  | 0.33  | 0.30  |
| China   | G4600     | 1              | 0.99 | 0.98 | 0.95 | 0.91 | 0.86 | 0.82 | 0.78 | 0.73 | 0.69 | 0.65  | 0.58  | 0.51  | 0.45  | 0.39  | 0.33  | 0.24  | 0.20  |
| China   | G4602     | 1              | 1.00 | 0.98 | 0.96 | 0.94 | 0.92 | 0.90 | 0.88 | 0.86 | 0.84 | 0.82  | 0.76  | 0.71  | 0.65  | 0.59  | 0.53  | 0.38  | 0.27  |
| China   | G4607     | 1              | 0.99 | 0.96 | 0.91 | 0.85 | 0.80 | 0.74 | 0.70 | 0.66 | 0.62 | 0.58  | 0.52  | 0.47  | 0.42  | 0.38  | 0.35  | 0.30  | 0.26  |
| China   | G4608     | 1              | 0.97 | 0.91 | 0.85 | 0.78 | 0.73 | 0.68 | 0.63 | 0.59 | 0.57 | 0.53  | 0.47  | 0.42  | 0.38  | 0.34  | 0.33  | 0.29  | 0.26  |
| China   | G4610     | 1              | 1.00 | 0.99 | 0.97 | 0.95 | 0.91 | 0.88 | 0.85 | 0.82 | 0.79 | 0.75  | 0.69  | 0.62  | 0.57  | 0.51  | 0.44  | 0.31  | 0.25  |
| China   | G4611     | 1              | 1.00 | 0.99 | 0.98 | 0.96 | 0.94 | 0.92 | 0.89 | 0.87 | 0.84 | 0.81  | 0.75  | 0.69  | 0.63  | 0.58  | 0.52  | 0.39  | 0.32  |
| China   | G4612     | 1              | 1.00 | 0.99 | 0.98 | 0.95 | 0.93 | 0.90 | 0.88 | 0.85 | 0.82 | 0.79  | 0.73  | 0.68  | 0.62  | 0.57  | 0.51  | 0.39  | 0.32  |
| China   | G4621     | 1              | 0.99 | 0.97 | 0.93 | 0.89 | 0.84 | 0.80 | 0.75 | 0.70 | 0.66 | 0.62  | 0.55  | 0.50  | 0.44  | 0.39  | 0.34  | 0.30  | 0.26  |
| China   | G4625     | 1              | 1.00 | 0.99 | 0.98 | 0.97 | 0.95 | 0.93 | 0.90 | 0.88 | 0.85 | 0.83  | 0.77  | 0.72  | 0.66  | 0.61  | 0.56  | 0.43  | 0.36  |
| China   | G4626     | 1              | 0.99 | 0.95 | 0.91 | 0.85 | 0.79 | 0.74 | 0.69 | 0.62 | 0.57 | 0.52  | 0.44  | 0.37  | 0.30  | 0.25  | 0.21  | 0.15  | 0.14  |
| China   | G4630     | 1              | 0.99 | 0.96 | 0.90 | 0.80 | 0.73 | 0.66 | 0.60 | 0.54 | 0.49 | 0.46  | 0.38  | 0.33  | 0.28  | 0.23  | 0.20  | 0.17  | 0.16  |
| India   | G1722     | 1              | 1.00 | 0.99 | 0.98 | 0.95 | 0.92 | 0.87 | 0.83 | 0.78 | 0.73 | 0.69  | 0.61  | 0.53  | 0.45  | 0.39  | 0.32  | 0.22  | 0.15  |
| India   | G1723     | 1              | 0.98 | 0.85 | 0.67 | 0.49 | 0.34 | 0.19 | 0.11 | 0.06 | 0.02 | -0.03 | -0.07 | -0.11 | -0.15 | -0.18 | -0.21 | -0.22 | -0.29 |
| India   | G1768     | 1              | 1.00 | 0.99 | 0.98 | 0.96 | 0.93 | 0.89 | 0.85 | 0.80 | 0.75 | 0.72  | 0.64  | 0.56  | 0.48  | 0.41  | 0.34  | 0.23  | 0.16  |
| India   | G1769     | 1              | 1.00 | 1.00 | 0.98 | 0.96 | 0.92 | 0.88 | 0.84 | 0.79 | 0.75 | 0.71  | 0.63  | 0.55  | 0.48  | 0.41  | 0.35  | 0.26  | 0.21  |
| India   | G1770     | 1              | 0.97 | 0.79 | 0.62 | 0.48 | 0.33 | 0.20 | 0.15 | 0.12 | 0.08 | 0.05  | 0.02  | -0.03 | -0.07 | -0.08 | -0.09 | -0.09 | -0.17 |
| India   | G1771     | 1              | 1.00 | 0.97 | 0.89 | 0.80 | 0.69 | 0.58 | 0.48 | 0.39 | 0.32 | 0.28  | 0.19  | 0.13  | 0.08  | 0.05  | 0.02  | 0.02  | -0.05 |
| India   | G1772     | 1              | 0.99 | 0.92 | 0.81 | 0.69 | 0.57 | 0.46 | 0.36 | 0.29 | 0.25 | 0.21  | 0.13  | 0.09  | 0.05  | 0.02  | 0.01  | 0.00  | -0.06 |
| India   | G1773     | 1              | 1.00 | 0.99 | 0.94 | 0.86 | 0.77 | 0.67 | 0.57 | 0.47 | 0.39 | 0.33  | 0.24  | 0.16  | 0.11  | 0.07  | 0.03  | 0.02  | -0.04 |
| India   | G1774     | 1              | 1.00 | 0.99 | 0.98 | 0.95 | 0.92 | 0.88 | 0.84 | 0.80 | 0.76 | 0.72  | 0.65  | 0.60  | 0.54  | 0.49  | 0.46  | 0.37  | 0.29  |
| India   | G1775     | 1              | 0.98 | 0.89 | 0.75 | 0.61 | 0.50 | 0.42 | 0.37 | 0.32 | 0.28 | 0.25  | 0.20  | 0.14  | 0.11  | 0.08  | 0.11  | 0.07  | 0.05  |
| India   | G1776     | 1              | 0.99 | 0.92 | 0.80 | 0.71 | 0.64 | 0.57 | 0.52 | 0.49 | 0.45 | 0.40  | 0.37  | 0.30  | 0.26  | 0.23  | 0.21  | 0.20  | 0.19  |
| India   | G1777     | 1              | 0.99 | 0.92 | 0.79 | 0.68 | 0.58 | 0.52 | 0.45 | 0.39 | 0.36 | 0.32  | 0.26  | 0.21  | 0.15  | 0.12  | 0.11  | 0.11  | 0.09  |
| India   | G1918     | 1              | 0.99 | 0.96 | 0.92 | 0.86 | 0.80 | 0.74 | 0.66 | 0.58 | 0.51 | 0.45  | 0.35  | 0.24  | 0.16  | 0.10  | 0.06  | 0.00  | -0.08 |

| Country | GloFAS ID | Station filter | LT1  | LT2  | LT3  | LT4  | LT5  | LT6  | LT7  | LT8   | LT9   | LT10  | LT12  | LT14  | LT16  | LT18  | LT20  | LT25  | L30   |
|---------|-----------|----------------|------|------|------|------|------|------|------|-------|-------|-------|-------|-------|-------|-------|-------|-------|-------|
| India   | G1919     | 1              | 1.00 | 0.97 | 0.88 | 0.77 | 0.66 | 0.56 | 0.49 | 0.45  | 0.39  | 0.35  | 0.26  | 0.19  | 0.13  | 0.10  | 0.08  | 0.04  | -0.05 |
| India   | G1920     | 1              | 0.89 | 0.71 | 0.53 | 0.42 | 0.34 | 0.27 | 0.23 | 0.20  | 0.18  | 0.13  | 0.07  | 0.01  | -0.02 | -0.02 | 0.00  | 0.01  | -0.01 |
| India   | G1926     | 1              | 0.99 | 0.96 | 0.91 | 0.84 | 0.78 | 0.72 | 0.67 | 0.63  | 0.57  | 0.53  | 0.44  | 0.37  | 0.30  | 0.25  | 0.21  | 0.14  | 0.11  |
| India   | G1927     | 1              | 0.99 | 0.97 | 0.93 | 0.88 | 0.82 | 0.76 | 0.70 | 0.66  | 0.61  | 0.56  | 0.47  | 0.39  | 0.33  | 0.27  | 0.23  | 0.14  | 0.11  |
| India   | G1928     | 1              | 0.99 | 0.98 | 0.94 | 0.87 | 0.82 | 0.77 | 0.71 | 0.66  | 0.61  | 0.55  | 0.46  | 0.38  | 0.32  | 0.26  | 0.21  | 0.12  | 0.10  |
| India   | G1929     | 1              | 0.99 | 0.95 | 0.92 | 0.90 | 0.87 | 0.84 | 0.84 | 0.83  | 0.80  | 0.79  | 0.78  | 0.77  | 0.75  | 0.75  | 0.72  | 0.71  | 0.67  |
| India   | G1930     | 1              | 1.00 | 1.00 | 0.99 | 0.98 | 0.98 | 0.96 | 0.95 | 0.94  | 0.92  | 0.90  | 0.85  | 0.78  | 0.72  | 0.65  | 0.58  | 0.41  | 0.28  |
| India   | G1931     | 1              | 0.99 | 0.97 | 0.94 | 0.89 | 0.84 | 0.79 | 0.75 | 0.70  | 0.65  | 0.62  | 0.56  | 0.53  | 0.48  | 0.47  | 0.45  | 0.39  | 0.35  |
| India   | G1932     | 1              | 1.00 | 0.98 | 0.92 | 0.85 | 0.77 | 0.71 | 0.66 | 0.62  | 0.57  | 0.52  | 0.45  | 0.40  | 0.36  | 0.31  | 0.29  | 0.24  | 0.20  |
| India   | G1934     | 1              | 0.99 | 0.95 | 0.90 | 0.85 | 0.78 | 0.71 | 0.66 | 0.63  | 0.59  | 0.56  | 0.50  | 0.45  | 0.39  | 0.34  | 0.29  | 0.21  | 0.14  |
| India   | G1935     | 1              | 0.99 | 0.93 | 0.84 | 0.75 | 0.68 | 0.62 | 0.56 | 0.51  | 0.48  | 0.45  | 0.41  | 0.36  | 0.31  | 0.26  | 0.21  | 0.16  | 0.11  |
| India   | G1936     | 1              | 0.99 | 0.94 | 0.85 | 0.74 | 0.67 | 0.61 | 0.55 | 0.49  | 0.46  | 0.44  | 0.37  | 0.32  | 0.27  | 0.22  | 0.17  | 0.11  | 0.07  |
| India   | G1937     | 1              | 0.98 | 0.93 | 0.83 | 0.72 | 0.65 | 0.60 | 0.53 | 0.47  | 0.45  | 0.42  | 0.35  | 0.30  | 0.25  | 0.20  | 0.16  | 0.09  | 0.05  |
| India   | G1938     | 1              | 0.99 | 0.96 | 0.91 | 0.85 | 0.78 | 0.72 | 0.66 | 0.62  | 0.57  | 0.52  | 0.45  | 0.38  | 0.32  | 0.27  | 0.22  | 0.13  | 0.09  |
| India   | G1939     | 1              | 0.93 | 0.86 | 0.67 | 0.67 | 0.70 | 0.62 | 0.51 | 0.56  | 0.58  | 0.45  | 0.53  | 0.41  | 0.52  | 0.45  | 0.46  | 0.42  | 0.47  |
| India   | G1940     | 1              | 0.99 | 0.92 | 0.82 | 0.73 | 0.67 | 0.61 | 0.57 | 0.54  | 0.51  | 0.47  | 0.42  | 0.38  | 0.34  | 0.29  | 0.24  | 0.17  | 0.11  |
| India   | G1941     | 1              | 1.00 | 0.99 | 0.95 | 0.88 | 0.81 | 0.74 | 0.68 | 0.62  | 0.58  | 0.55  | 0.48  | 0.43  | 0.38  | 0.34  | 0.29  | 0.20  | 0.13  |
| India   | G4317     | 1              | 1.00 | 0.99 | 0.97 | 0.94 | 0.91 | 0.89 | 0.88 | 0.86  | 0.84  | 0.83  | 0.81  | 0.78  | 0.75  | 0.72  | 0.69  | 0.62  | 0.56  |
| India   | G4321     | 1              | 1.00 | 0.99 | 0.98 | 0.96 | 0.93 | 0.93 | 0.92 | 0.90  | 0.88  | 0.87  | 0.79  | 0.71  | 0.62  | 0.52  | 0.42  | 0.19  | 0.04  |
| India   | G4384     | 1              | 1.00 | 1.00 | 0.99 | 0.90 | 0.79 | 0.70 | 0.58 | 0.51  | 0.49  | 0.49  | 0.44  | 0.38  | 0.37  | 0.31  | 0.29  | 0.30  | 0.31  |
| India   | G4392     | 1              | 1.00 | 1.00 | 0.99 | 0.95 | 0.89 | 0.79 | 0.69 | 0.64  | 0.56  | 0.52  | 0.48  | 0.43  | 0.39  | 0.38  | 0.33  | 0.35  | 0.33  |
| India   | G4423     | 1              | 0.98 | 0.92 | 0.86 | 0.75 | 0.65 | 0.64 | 0.57 | 0.52  | 0.47  | 0.46  | 0.41  | 0.39  | 0.37  | 0.36  | 0.37  | 0.36  | 0.35  |
| India   | G4450     | 1              | 0.94 | 0.83 | 0.70 | 0.60 | 0.53 | 0.49 | 0.44 | 0.39  | 0.35  | 0.31  | 0.24  | 0.18  | 0.12  | 0.07  | 0.02  | -0.08 | -0.16 |
| India   | G4455     | 1              | 0.79 | 0.53 | 0.34 | 0.19 | 0.09 | 0.05 | 0.01 | -0.04 | -0.07 | -0.09 | -0.14 | -0.17 | -0.18 | -0.18 | -0.18 | -0.26 | -0.31 |
| India   | G4472     | 1              | 1.00 | 0.99 | 0.98 | 0.95 | 0.91 | 0.84 | 0.78 | 0.71  | 0.65  | 0.59  | 0.47  | 0.39  | 0.31  | 0.24  | 0.18  | 0.12  | 0.08  |
| India   | G4474     | 1              | 1.00 | 0.99 | 0.98 | 0.97 | 0.95 | 0.92 | 0.87 | 0.82  | 0.77  | 0.72  | 0.62  | 0.53  | 0.47  | 0.41  | 0.32  | 0.21  | 0.13  |
| India   | G4481     | 1              | 1.00 | 0.97 | 0.92 | 0.83 | 0.75 | 0.67 | 0.59 | 0.52  | 0.49  | 0.44  | 0.37  | 0.33  | 0.31  | 0.30  | 0.31  | 0.28  | 0.29  |
| India   | G4483     | 1              | 0.95 | 0.84 | 0.73 | 0.62 | 0.54 | 0.49 | 0.43 | 0.37  | 0.33  | 0.29  | 0.21  | 0.15  | 0.09  | 0.05  | 0.03  | -0.01 | -0.08 |
| India   | G4487     | 1              | 1.00 | 0.99 | 0.96 | 0.89 | 0.79 | 0.69 | 0.60 | 0.53  | 0.48  | 0.43  | 0.33  | 0.25  | 0.18  | 0.13  | 0.11  | 0.06  | -0.02 |
| India   | G4492     | 1              | 0.99 | 0.96 | 0.92 | 0.86 | 0.78 | 0.69 | 0.60 | 0.52  | 0.47  | 0.42  | 0.32  | 0.24  | 0.17  | 0.11  | 0.09  | 0.04  | -0.04 |
| India   | G4494     | 1              | 1.00 | 0.99 | 0.98 | 0.96 | 0.93 | 0.90 | 0.86 | 0.81  | 0.76  | 0.72  | 0.62  | 0.54  | 0.49  | 0.45  | 0.38  | 0.25  | 0.17  |
| India   | G4495     | 1              | 0.99 | 0.98 | 0.95 | 0.90 | 0.84 | 0.76 | 0.68 | 0.60  | 0.53  | 0.48  | 0.37  | 0.28  | 0.20  | 0.14  | 0.11  | 0.05  | -0.03 |
| India   | G4496     | 1              | 0.95 | 0.83 | 0.71 | 0.61 | 0.52 | 0.45 | 0.40 | 0.35  | 0.31  | 0.28  | 0.21  | 0.16  | 0.13  | 0.11  | 0.08  | 0.04  | 0.00  |
| India   | G4501     | 1              | 0.99 | 0.96 | 0.93 | 0.88 | 0.82 | 0.75 | 0.68 | 0.63  | 0.60  | 0.56  | 0.52  | 0.47  | 0.42  | 0.41  | 0.36  | 0.26  | 0.21  |
| India   | G4507     | 1              | 0.98 | 0.93 | 0.84 | 0.75 | 0.68 | 0.61 | 0.56 | 0.52  | 0.49  | 0.45  | 0.42  | 0.38  | 0.35  | 0.33  | 0.32  | 0.28  | 0.25  |
| India   | G4513     | 1              | 1.00 | 0.99 | 0.98 | 0.94 | 0.89 | 0.81 | 0.73 | 0.64  | 0.56  | 0.48  | 0.36  | 0.27  | 0.19  | 0.14  | 0.10  | 0.02  | -0.02 |
| India   | G4516     | 1              | 1.00 | 0.99 | 0.97 | 0.93 | 0.89 | 0.84 | 0.78 | 0.71  | 0.64  | 0.57  | 0.46  | 0.36  | 0.25  | 0.17  | 0.11  | 0.03  | -0.03 |
| India   | G4517     | 1              | 0.96 | 0.88 | 0.79 | 0.69 | 0.61 | 0.54 | 0.48 | 0.43  | 0.40  | 0.37  | 0.29  | 0.24  | 0.20  | 0.16  | 0.13  | 0.06  | 0.02  |
| India   | G4522     | 1              | 0.99 | 0.97 | 0.94 | 0.90 | 0.82 | 0.75 | 0.69 | 0.63  | 0.56  | 0.53  | 0.47  | 0.39  | 0.33  | 0.31  | 0.28  | 0.25  | 0.17  |

| Country | GloFAS ID | Station filter | LT1  | LT2  | LT3  | LT4  | LT5  | LT6  | LT7  | LT8  | LT9  | LT10 | LT12 | LT14 | LT16  | LT18  | LT20  | LT25  | L30   |
|---------|-----------|----------------|------|------|------|------|------|------|------|------|------|------|------|------|-------|-------|-------|-------|-------|
| India   | G4526     | 1              | 1.00 | 0.99 | 0.98 | 0.96 | 0.93 | 0.89 | 0.85 | 0.79 | 0.75 | 0.71 | 0.63 | 0.57 | 0.54  | 0.51  | 0.49  | 0.42  | 0.36  |
| India   | G4529     | 1              | 1.00 | 0.98 | 0.95 | 0.90 | 0.85 | 0.80 | 0.75 | 0.71 | 0.68 | 0.65 | 0.62 | 0.59 | 0.58  | 0.56  | 0.54  | 0.48  | 0.44  |
| India   | G4530     | 1              | 0.98 | 0.91 | 0.86 | 0.80 | 0.68 | 0.56 | 0.53 | 0.49 | 0.43 | 0.39 | 0.39 | 0.34 | 0.31  | 0.33  | 0.30  | 0.30  | 0.24  |
| India   | G4531     | 1              | 0.99 | 0.96 | 0.90 | 0.82 | 0.74 | 0.68 | 0.64 | 0.59 | 0.56 | 0.54 | 0.49 | 0.46 | 0.43  | 0.42  | 0.39  | 0.30  | 0.24  |
| India   | G4532     | 1              | 1.00 | 0.99 | 0.97 | 0.94 | 0.90 | 0.85 | 0.81 | 0.76 | 0.72 | 0.68 | 0.61 | 0.55 | 0.52  | 0.50  | 0.47  | 0.40  | 0.34  |
| India   | G4533     | 1              | 1.00 | 0.99 | 0.98 | 0.96 | 0.91 | 0.87 | 0.80 | 0.74 | 0.67 | 0.61 | 0.47 | 0.38 | 0.30  | 0.23  | 0.18  | 0.09  | 0.04  |
| India   | G4538     | 1              | 1.00 | 0.97 | 0.89 | 0.79 | 0.73 | 0.66 | 0.58 | 0.55 | 0.52 | 0.49 | 0.47 | 0.45 | 0.43  | 0.39  | 0.38  | 0.31  | 0.26  |
| India   | G4539     | 1              | 0.99 | 0.97 | 0.92 | 0.86 | 0.78 | 0.71 | 0.65 | 0.62 | 0.58 | 0.56 | 0.51 | 0.48 | 0.43  | 0.40  | 0.37  | 0.27  | 0.21  |
| India   | G4540     | 1              | 0.99 | 0.97 | 0.96 | 0.95 | 0.94 | 0.92 | 0.92 | 0.91 | 0.90 | 0.90 | 0.88 | 0.87 | 0.86  | 0.85  | 0.84  | 0.81  | 0.77  |
| India   | G4542     | 1              | 0.99 | 0.95 | 0.88 | 0.84 | 0.79 | 0.74 | 0.71 | 0.68 | 0.65 | 0.62 | 0.56 | 0.52 | 0.48  | 0.45  | 0.43  | 0.33  | 0.27  |
| India   | G4548     | 1              | 1.00 | 0.99 | 0.97 | 0.94 | 0.90 | 0.86 | 0.81 | 0.77 | 0.74 | 0.70 | 0.62 | 0.57 | 0.51  | 0.48  | 0.45  | 0.40  | 0.36  |
| India   | G4549     | 1              | 1.00 | 1.00 | 0.99 | 0.98 | 0.96 | 0.94 | 0.91 | 0.88 | 0.84 | 0.80 | 0.73 | 0.66 | 0.60  | 0.55  | 0.51  | 0.43  | 0.37  |
| India   | G4551     | 1              | 1.00 | 1.00 | 0.99 | 0.97 | 0.95 | 0.92 | 0.88 | 0.84 | 0.80 | 0.76 | 0.67 | 0.60 | 0.54  | 0.48  | 0.43  | 0.33  | 0.28  |
| India   | G4555     | 1              | 1.00 | 0.99 | 0.98 | 0.96 | 0.95 | 0.92 | 0.90 | 0.88 | 0.85 | 0.83 | 0.78 | 0.74 | 0.68  | 0.63  | 0.58  | 0.43  | 0.28  |
| India   | G4558     | 1              | 1.00 | 0.99 | 0.98 | 0.97 | 0.95 | 0.94 | 0.94 | 0.92 | 0.91 | 0.91 | 0.89 | 0.89 | 0.87  | 0.86  | 0.85  | 0.81  | 0.78  |
| India   | G4559     | 1              | 0.99 | 0.97 | 0.90 | 0.83 | 0.76 | 0.69 | 0.60 | 0.55 | 0.52 | 0.47 | 0.40 | 0.36 | 0.30  | 0.26  | 0.24  | 0.17  | 0.15  |
| India   | G4560     | 1              | 1.00 | 1.00 | 0.99 | 0.98 | 0.97 | 0.93 | 0.89 | 0.86 | 0.82 | 0.77 | 0.69 | 0.58 | 0.52  | 0.43  | 0.37  | 0.25  | 0.18  |
| India   | G4561     | 1              | 1.00 | 0.98 | 0.95 | 0.92 | 0.88 | 0.80 | 0.72 | 0.68 | 0.65 | 0.58 | 0.51 | 0.43 | 0.40  | 0.34  | 0.30  | 0.23  | 0.23  |
| India   | G4562     | 1              | 0.99 | 0.96 | 0.88 | 0.76 | 0.63 | 0.53 | 0.41 | 0.32 | 0.26 | 0.21 | 0.11 | 0.07 | 0.01  | -0.04 | -0.08 | -0.13 | -0.17 |
| India   | G4563     | 1              | 1.00 | 0.99 | 0.98 | 0.96 | 0.92 | 0.87 | 0.82 | 0.78 | 0.74 | 0.70 | 0.62 | 0.57 | 0.52  | 0.49  | 0.46  | 0.39  | 0.33  |
| India   | G4564     | 1              | 1.00 | 0.99 | 0.99 | 0.97 | 0.94 | 0.91 | 0.87 | 0.83 | 0.79 | 0.76 | 0.68 | 0.63 | 0.57  | 0.52  | 0.48  | 0.39  | 0.32  |
| India   | G4565     | 1              | 1.00 | 1.00 | 0.99 | 0.98 | 0.96 | 0.93 | 0.89 | 0.85 | 0.81 | 0.77 | 0.69 | 0.61 | 0.54  | 0.47  | 0.40  | 0.29  | 0.25  |
| India   | G4567     | 1              | 0.99 | 0.95 | 0.89 | 0.83 | 0.79 | 0.75 | 0.72 | 0.69 | 0.67 | 0.64 | 0.59 | 0.54 | 0.50  | 0.45  | 0.40  | 0.29  | 0.20  |
| India   | G4568     | 1              | 0.98 | 0.90 | 0.77 | 0.64 | 0.56 | 0.53 | 0.50 | 0.44 | 0.39 | 0.35 | 0.30 | 0.29 | 0.27  | 0.27  | 0.27  | 0.22  | 0.21  |
| India   | G4576     | 1              | 0.99 | 0.96 | 0.91 | 0.85 | 0.79 | 0.73 | 0.68 | 0.64 | 0.61 | 0.57 | 0.51 | 0.46 | 0.43  | 0.41  | 0.37  | 0.33  | 0.27  |
| India   | G4577     | 1              | 0.89 | 0.62 | 0.42 | 0.31 | 0.23 | 0.17 | 0.14 | 0.13 | 0.08 | 0.06 | 0.03 | 0.00 | -0.03 | -0.08 | -0.11 | -0.13 | -0.16 |
| India   | G4581     | 1              | 0.99 | 0.97 | 0.95 | 0.92 | 0.89 | 0.88 | 0.86 | 0.85 | 0.85 | 0.84 | 0.82 | 0.81 | 0.80  | 0.78  | 0.76  | 0.73  | 0.70  |
| India   | G4582     | 1              | 0.96 | 0.87 | 0.77 | 0.69 | 0.60 | 0.56 | 0.53 | 0.47 | 0.45 | 0.42 | 0.40 | 0.37 | 0.35  | 0.35  | 0.35  | 0.30  | 0.28  |
| India   | G4594     | 1              | 0.99 | 0.97 | 0.94 | 0.88 | 0.81 | 0.77 | 0.73 | 0.68 | 0.63 | 0.61 | 0.53 | 0.50 | 0.45  | 0.45  | 0.44  | 0.41  | 0.37  |
| India   | G4596     | 1              | 1.00 | 0.96 | 0.91 | 0.85 | 0.81 | 0.77 | 0.67 | 0.58 | 0.57 | 0.56 | 0.45 | 0.43 | 0.37  | 0.34  | 0.31  | 0.27  | 0.20  |
| India   | G4632     | 1              | 1.00 | 0.99 | 0.96 | 0.92 | 0.89 | 0.86 | 0.82 | 0.78 | 0.76 | 0.74 | 0.69 | 0.65 | 0.60  | 0.56  | 0.53  | 0.46  | 0.39  |
| India   | G4658     | 1              | 0.98 | 0.91 | 0.83 | 0.74 | 0.68 | 0.62 | 0.57 | 0.54 | 0.52 | 0.49 | 0.44 | 0.40 | 0.37  | 0.34  | 0.30  | 0.23  | 0.20  |
| India   | G4662     | 1              | 0.96 | 0.87 | 0.80 | 0.74 | 0.69 | 0.65 | 0.62 | 0.58 | 0.53 | 0.52 | 0.46 | 0.41 | 0.36  | 0.32  | 0.29  | 0.22  | 0.16  |
| India   | G4663     | 1              | 0.99 | 0.97 | 0.96 | 0.94 | 0.93 | 0.91 | 0.89 | 0.88 | 0.85 | 0.83 | 0.79 | 0.74 | 0.69  | 0.64  | 0.58  | 0.45  | 0.32  |
| India   | G4664     | 1              | 0.97 | 0.86 | 0.77 | 0.71 | 0.64 | 0.59 | 0.56 | 0.54 | 0.52 | 0.49 | 0.46 | 0.42 | 0.37  | 0.35  | 0.31  | 0.25  | 0.18  |
| India   | G4685     | 1              | 0.99 | 0.97 | 0.92 | 0.84 | 0.77 | 0.71 | 0.64 | 0.57 | 0.54 | 0.50 | 0.42 | 0.38 | 0.32  | 0.28  | 0.25  | 0.17  | 0.15  |
| India   | G4688     | 1              | 0.92 | 0.78 | 0.67 | 0.58 | 0.48 | 0.44 | 0.40 | 0.37 | 0.34 | 0.33 | 0.28 | 0.23 | 0.19  | 0.17  | 0.16  | 0.12  | 0.10  |
| India   | G4692     | 1              | 0.96 | 0.85 | 0.72 | 0.61 | 0.51 | 0.44 | 0.40 | 0.35 | 0.33 | 0.31 | 0.26 | 0.22 | 0.17  | 0.14  | 0.12  | 0.10  | 0.07  |
| India   | G4693     | 1              | 0.99 | 0.95 | 0.90 | 0.85 | 0.77 | 0.71 | 0.66 | 0.60 | 0.54 | 0.50 | 0.43 | 0.39 | 0.33  | 0.29  | 0.24  | 0.13  | 0.06  |

| Country   | GloFAS ID | Station filter | LT1  | LT2  | LT3  | LT4  | LT5   | LT6   | LT7   | LT8   | LT9   | LT10  | LT12  | LT14  | LT16  | LT18  | LT20  | LT25  | L30   |
|-----------|-----------|----------------|------|------|------|------|-------|-------|-------|-------|-------|-------|-------|-------|-------|-------|-------|-------|-------|
| India     | G4711     | 1              | 0.99 | 0.93 | 0.85 | 0.77 | 0.69  | 0.64  | 0.61  | 0.56  | 0.51  | 0.46  | 0.41  | 0.36  | 0.31  | 0.27  | 0.23  | 0.17  | 0.15  |
| India     | G4716     | 1              | 0.98 | 0.90 | 0.82 | 0.76 | 0.69  | 0.62  | 0.56  | 0.53  | 0.48  | 0.43  | 0.39  | 0.31  | 0.30  | 0.26  | 0.23  | 0.19  | 0.17  |
| India     | G4724     | 1              | 0.99 | 0.95 | 0.89 | 0.81 | 0.72  | 0.66  | 0.61  | 0.56  | 0.50  | 0.46  | 0.40  | 0.35  | 0.28  | 0.25  | 0.19  | 0.12  | 0.07  |
| India     | G4725     | 1              | 0.99 | 0.96 | 0.90 | 0.84 | 0.77  | 0.70  | 0.66  | 0.61  | 0.57  | 0.51  | 0.44  | 0.37  | 0.33  | 0.28  | 0.25  | 0.17  | 0.15  |
| India     | G4739     | 1              | 0.98 | 0.93 | 0.85 | 0.79 | 0.73  | 0.69  | 0.62  | 0.56  | 0.51  | 0.48  | 0.42  | 0.40  | 0.33  | 0.32  | 0.32  | 0.25  | 0.25  |
| India     | G4743     | 1              | 0.99 | 0.98 | 0.94 | 0.89 | 0.83  | 0.80  | 0.77  | 0.72  | 0.70  | 0.70  | 0.64  | 0.61  | 0.56  | 0.54  | 0.51  | 0.43  | 0.36  |
| India     | G4750     | 1              | 0.99 | 0.96 | 0.90 | 0.83 | 0.76  | 0.68  | 0.64  | 0.60  | 0.57  | 0.56  | 0.50  | 0.46  | 0.43  | 0.40  | 0.37  | 0.27  | 0.20  |
| India     | G4758     | 1              | 0.88 | 0.73 | 0.69 | 0.63 | 0.52  | 0.48  | 0.51  | 0.48  | 0.39  | 0.43  | 0.38  | 0.40  | 0.33  | 0.38  | 0.33  | 0.37  | 0.30  |
| India     | G4759     | 1              | 1.00 | 0.97 | 0.89 | 0.83 | 0.78  | 0.75  | 0.67  | 0.60  | 0.59  | 0.54  | 0.47  | 0.43  | 0.39  | 0.36  | 0.36  | 0.29  | 0.28  |
| India     | G4760     | 1              | 0.98 | 0.90 | 0.81 | 0.71 | 0.64  | 0.59  | 0.54  | 0.47  | 0.41  | 0.39  | 0.31  | 0.27  | 0.21  | 0.18  | 0.15  | 0.14  | 0.11  |
| India     | G4763     | 1              | 0.99 | 0.95 | 0.90 | 0.87 | 0.83  | 0.76  | 0.72  | 0.68  | 0.63  | 0.59  | 0.52  | 0.44  | 0.40  | 0.36  | 0.32  | 0.26  | 0.21  |
| India     | G4764     | 1              | 0.95 | 0.85 | 0.73 | 0.65 | 0.53  | 0.44  | 0.42  | 0.37  | 0.32  | 0.30  | 0.27  | 0.25  | 0.20  | 0.21  | 0.17  | 0.18  | 0.17  |
| India     | G4806     | 1              | 0.96 | 0.88 | 0.76 | 0.65 | 0.59  | 0.54  | 0.47  | 0.42  | 0.38  | 0.35  | 0.30  | 0.26  | 0.21  | 0.17  | 0.16  | 0.12  | 0.12  |
| India     | G4808     | 1              | 1.00 | 0.98 | 0.94 | 0.89 | 0.83  | 0.78  | 0.72  | 0.67  | 0.63  | 0.57  | 0.48  | 0.40  | 0.33  | 0.27  | 0.23  | 0.14  | 0.11  |
| India     | G4814     | 1              | 1.00 | 0.99 | 0.98 | 0.96 | 0.94  | 0.89  | 0.85  | 0.83  | 0.80  | 0.77  | 0.74  | 0.69  | 0.63  | 0.60  | 0.57  | 0.49  | 0.42  |
| India     | G4815     | 1              | 1.00 | 0.99 | 0.98 | 0.94 | 0.87  | 0.81  | 0.75  | 0.70  | 0.65  | 0.62  | 0.56  | 0.49  | 0.44  | 0.42  | 0.38  | 0.32  | 0.25  |
| India     | G4844     | 1              | 0.99 | 0.99 | 0.98 | 0.97 | 0.96  | 0.95  | 0.94  | 0.94  | 0.93  | 0.93  | 0.91  | 0.90  | 0.89  | 0.88  | 0.87  | 0.84  | 0.80  |
| India     | G4847     | 1              | 1.00 | 0.99 | 0.98 | 0.97 | 0.94  | 0.92  | 0.90  | 0.88  | 0.85  | 0.83  | 0.77  | 0.72  | 0.66  | 0.62  | 0.58  | 0.49  | 0.41  |
| India     | G4855     | 1              | 1.00 | 1.00 | 0.99 | 0.99 | 0.98  | 0.97  | 0.96  | 0.94  | 0.92  | 0.89  | 0.82  | 0.75  | 0.67  | 0.60  | 0.51  | 0.33  | 0.19  |
| India     | G4860     | 1              | 0.98 | 0.92 | 0.86 | 0.82 | 0.77  | 0.73  | 0.70  | 0.68  | 0.65  | 0.62  | 0.57  | 0.52  | 0.49  | 0.47  | 0.45  | 0.37  | 0.30  |
| India     | G4870     | 1              | 0.99 | 0.98 | 0.97 | 0.97 | 0.95  | 0.94  | 0.92  | 0.91  | 0.90  | 0.87  | 0.84  | 0.79  | 0.74  | 0.68  | 0.62  | 0.46  | 0.30  |
| India     | G4871     | 1              | 0.99 | 0.97 | 0.95 | 0.92 | 0.88  | 0.83  | 0.78  | 0.70  | 0.63  | 0.57  | 0.48  | 0.42  | 0.35  | 0.30  | 0.26  | 0.15  | 0.10  |
| Indonesia | G5240     | 1              | 0.99 | 0.95 | 0.89 | 0.81 | 0.72  | 0.65  | 0.59  | 0.55  | 0.51  | 0.49  | 0.43  | 0.38  | 0.33  | 0.29  | 0.25  | 0.16  | 0.09  |
| Indonesia | G5245     | 1              | 0.97 | 0.88 | 0.77 | 0.68 | 0.61  | 0.55  | 0.52  | 0.49  | 0.46  | 0.43  | 0.38  | 0.33  | 0.30  | 0.26  | 0.22  | 0.14  | 0.09  |
| Indonesia | G5246     | 1              | 0.46 | 0.25 | 0.22 | 0.16 | 0.15  | 0.13  | 0.10  | 0.07  | 0.06  | 0.05  | 0.01  | -0.02 | -0.10 | -0.14 | -0.16 | -0.21 | -0.25 |
| Indonesia | G5255     | 1              | 0.99 | 0.93 | 0.85 | 0.74 | 0.64  | 0.56  | 0.50  | 0.47  | 0.43  | 0.40  | 0.36  | 0.31  | 0.27  | 0.23  | 0.19  | 0.11  | 0.07  |
| Indonesia | G5309     | 1              | 0.99 | 0.91 | 0.80 | 0.69 | 0.60  | 0.53  | 0.48  | 0.43  | 0.39  | 0.35  | 0.29  | 0.25  | 0.20  | 0.17  | 0.16  | 0.12  | 0.07  |
| Indonesia | G5322     | 1              | 1.00 | 0.98 | 0.94 | 0.86 | 0.77  | 0.69  | 0.63  | 0.57  | 0.52  | 0.47  | 0.39  | 0.33  | 0.28  | 0.23  | 0.20  | 0.16  | 0.11  |
| Indonesia | G5365     | 1              | 0.69 | 0.53 | 0.46 | 0.41 | 0.37  | 0.35  | 0.33  | 0.30  | 0.29  | 0.27  | 0.24  | 0.21  | 0.20  | 0.18  | 0.17  | 0.15  | 0.13  |
| Indonesia | G5366     | 1              | 1.00 | 0.98 | 0.90 | 0.80 | 0.71  | 0.63  | 0.57  | 0.52  | 0.49  | 0.46  | 0.41  | 0.36  | 0.33  | 0.29  | 0.24  | 0.15  | 0.11  |
| Indonesia | G5367     | 1              | 0.96 | 0.87 | 0.76 | 0.66 | 0.59  | 0.53  | 0.48  | 0.45  | 0.43  | 0.40  | 0.35  | 0.29  | 0.26  | 0.22  | 0.19  | 0.13  | 0.09  |
| Indonesia | G5372     | 1              | 0.87 | 0.66 | 0.53 | 0.45 | 0.40  | 0.36  | 0.31  | 0.28  | 0.26  | 0.23  | 0.19  | 0.16  | 0.13  | 0.12  | 0.12  | 0.08  | 0.09  |
| Indonesia | G5466     | 1              | 0.73 | 0.35 | 0.15 | 0.03 | -0.05 | -0.11 | -0.15 | -0.18 | -0.20 | -0.20 | -0.23 | -0.23 | -0.06 | 0.11  | -0.05 | -0.22 | -0.29 |
| Indonesia | G5467     | 1              | 0.97 | 0.78 | 0.57 | 0.44 | 0.37  | 0.32  | 0.29  | 0.26  | 0.24  | 0.22  | 0.18  | 0.16  | 0.14  | 0.08  | 0.02  | -0.06 | -0.11 |
| Iran      | G4016     | 1              | 0.98 | 0.86 | 0.68 | 0.50 | 0.37  | 0.27  | 0.18  | 0.11  | 0.07  | 0.04  | -0.01 | -0.04 | -0.06 | -0.03 | -0.01 | 0.03  | 0.04  |
| Iran      | G4120     | 1              | 0.99 | 0.93 | 0.82 | 0.69 | 0.56  | 0.46  | 0.37  | 0.28  | 0.22  | 0.17  | 0.09  | 0.04  | 0.00  | -0.02 | -0.01 | 0.03  | 0.07  |
| Iran      | G4135     | 1              | 1.00 | 0.98 | 0.94 | 0.88 | 0.80  | 0.72  | 0.64  | 0.57  | 0.51  | 0.44  | 0.35  | 0.29  | 0.24  | 0.20  | 0.18  | 0.20  | 0.23  |
| Iran      | G4138     | 1              | 1.00 | 0.99 | 0.97 | 0.94 | 0.88  | 0.83  | 0.79  | 0.75  | 0.70  | 0.67  | 0.62  | 0.59  | 0.57  | 0.55  | 0.54  | 0.55  | 0.55  |
| Iran      | G4148     | 1              | 0.99 | 0.93 | 0.81 | 0.66 | 0.51  | 0.39  | 0.29  | 0.21  | 0.14  | 0.10  | 0.02  | -0.02 | -0.05 | -0.07 | -0.06 | 0.02  | 0.06  |

| Country | GloFAS ID | Station filter | LT1  | LT2  | LT3  | LT4   | LT5   | LT6    | LT7    | LT8    | LT9    | LT10   | LT12   | LT14   | LT16   | LT18   | LT20   | LT25  | L30   |
|---------|-----------|----------------|------|------|------|-------|-------|--------|--------|--------|--------|--------|--------|--------|--------|--------|--------|-------|-------|
| Iran    | G4154     | 1              | 1.00 | 0.99 | 0.99 | 0.96  | 0.92  | 0.86   | 0.78   | 0.70   | 0.62   | 0.54   | 0.42   | 0.30   | 0.22   | 0.16   | 0.12   | 0.13  | 0.21  |
| Iran    | G4166     | 1              | 1.00 | 1.00 | 1.00 | 0.98  | 0.96  | 0.93   | 0.90   | 0.85   | 0.81   | 0.77   | 0.68   | 0.61   | 0.56   | 0.51   | 0.47   | 0.41  | 0.40  |
| Iran    | G4173     | 1              | 1.00 | 1.00 | 1.00 | 1.00  | 1.00  | 1.00   | 0.99   | 0.98   | 0.97   | 0.95   | 0.90   | 0.84   | 0.77   | 0.69   | 0.61   | 0.45  | 0.36  |
| Iran    | G4176     | 1              | 0.99 | 0.89 | 0.77 | 0.66  | 0.58  | 0.51   | 0.44   | 0.39   | 0.35   | 0.30   | 0.25   | 0.20   | 0.16   | 0.15   | 0.17   | 0.19  | 0.20  |
| Iran    | G4177     | 1              | 1.00 | 0.98 | 0.95 | 0.91  | 0.87  | 0.83   | 0.81   | 0.78   | 0.76   | 0.75   | 0.70   | 0.67   | 0.64   | 0.63   | 0.63   | 0.64  | 0.61  |
| Iran    | G4178     | 1              | 1.00 | 1.00 | 0.99 | 0.98  | 0.95  | 0.92   | 0.89   | 0.86   | 0.84   | 0.82   | 0.78   | 0.74   | 0.71   | 0.68   | 0.66   | 0.67  | 0.65  |
| Iran    | G4179     | 1              | 1.00 | 0.98 | 0.94 | 0.88  | 0.82  | 0.77   | 0.73   | 0.70   | 0.67   | 0.67   | 0.64   | 0.61   | 0.58   | 0.60   | 0.58   | 0.61  | 0.57  |
| Iran    | G4188     | 1              | 1.00 | 1.00 | 0.98 | 0.95  | 0.91  | 0.87   | 0.83   | 0.81   | 0.79   | 0.76   | 0.72   | 0.68   | 0.66   | 0.64   | 0.63   | 0.61  | 0.59  |
| Iran    | G4189     | 1              | 1.00 | 0.99 | 0.94 | 0.86  | 0.75  | 0.62   | 0.50   | 0.39   | 0.29   | 0.21   | 0.08   | -0.01  | -0.09  | -0.13  | -0.16  | -0.03 | 0.06  |
| Iran    | G4190     | 1              | 1.00 | 0.99 | 0.98 | 0.96  | 0.92  | 0.89   | 0.85   | 0.82   | 0.78   | 0.75   | 0.69   | 0.61   | 0.53   | 0.47   | 0.41   | 0.32  | 0.27  |
| Iran    | G4266     | 1              | 1.00 | 1.00 | 1.00 | 1.00  | 0.99  | 0.99   | 0.97   | 0.96   | 0.94   | 0.92   | 0.89   | 0.86   | 0.83   | 0.81   | 0.80   | 0.77  | 0.74  |
| Iran    | G4271     | 1              | 1.00 | 1.00 | 0.97 | 0.88  | 0.78  | 0.66   | 0.50   | 0.40   | 0.34   | 0.25   | 0.14   | 0.04   | 0.00   | -0.05  | -0.07  | -0.04 | -0.01 |
| Iran    | G4278     | 1              | 1.00 | 1.00 | 1.00 | 0.99  | 0.96  | 0.90   | 0.84   | 0.75   | 0.64   | 0.57   | 0.45   | 0.34   | 0.27   | 0.21   | 0.17   | 0.11  | 0.12  |
| Iran    | G4292     | 1              | 1.00 | 0.97 | 0.93 | 0.88  | 0.85  | 0.81   | 0.77   | 0.74   | 0.71   | 0.67   | 0.60   | 0.54   | 0.48   | 0.42   | 0.38   | 0.27  | 0.20  |
| Iran    | G4294     | 1              | 1.00 | 0.98 | 0.96 | 0.93  | 0.91  | 0.89   | 0.86   | 0.84   | 0.82   | 0.81   | 0.76   | 0.72   | 0.68   | 0.63   | 0.59   | 0.50  | 0.42  |
| Iran    | G4295     | 1              | 1.00 | 0.99 | 0.98 | 0.97  | 0.95  | 0.92   | 0.89   | 0.87   | 0.83   | 0.80   | 0.74   | 0.68   | 0.63   | 0.60   | 0.57   | 0.55  | 0.54  |
| Iran    | G4297     | 1              | 1.00 | 1.00 | 0.99 | 0.99  | 0.98  | 0.98   | 0.98   | 0.97   | 0.95   | 0.94   | 0.92   | 0.91   | 0.89   | 0.88   | 0.87   | 0.86  | 0.86  |
| Iran    | G4298     | 1              | 1.00 | 1.00 | 1.00 | 1.00  | 1.00  | 1.00   | 1.00   | 0.99   | 0.99   | 0.98   | 0.97   | 0.96   | 0.95   | 0.93   | 0.92   | 0.88  | 0.85  |
| Iran    | G4309     | 1              | 1.00 | 1.00 | 1.00 | 1.00  | 1.00  | 0.99   | 0.99   | 0.99   | 0.98   | 0.97   | 0.95   | 0.91   | 0.86   | 0.80   | 0.75   | 0.63  | 0.55  |
| Iran    | G4339     | 1              | 1.00 | 1.00 | 0.99 | 0.99  | 0.99  | 0.99   | 0.98   | 0.98   | 0.97   | 0.96   | 0.95   | 0.93   | 0.90   | 0.87   | 0.84   | 0.79  | 0.76  |
| Iran    | G4343     | 1              | 1.00 | 1.00 | 0.99 | 0.98  | 0.97  | 0.95   | 0.93   | 0.91   | 0.89   | 0.87   | 0.83   | 0.79   | 0.76   | 0.73   | 0.71   | 0.68  | 0.66  |
| Iran    | G4355     | 1              | 1.00 | 0.99 | 0.99 | 0.98  | 0.96  | 0.94   | 0.91   | 0.89   | 0.86   | 0.83   | 0.77   | 0.71   | 0.66   | 0.60   | 0.54   | 0.43  | 0.33  |
| Iran    | G4382     | 1              | 1.00 | 0.98 | 0.94 | 0.91  | 0.87  | 0.80   | 0.76   | 0.74   | 0.70   | 0.66   | 0.61   | 0.55   | 0.52   | 0.48   | 0.45   | 0.41  | 0.39  |
| Iran    | G4465     | 1              | 1.00 | 0.98 | 0.95 | 0.95  | 0.92  | 0.85   | 0.82   | 0.81   | 0.78   | 0.75   | 0.71   | 0.65   | 0.62   | 0.59   | 0.57   | 0.55  | 0.52  |
| Iran    | G4467     | 1              | 1.00 | 1.00 | 1.00 | 0.98  | 0.96  | 0.94   | 0.93   | 0.91   | 0.88   | 0.87   | 0.83   | 0.83   | 0.80   | 0.79   | 0.76   | 0.71  | 0.68  |
| Iraq    | G4141     | 1              | 1.00 | 1.00 | 1.00 | 0.99  | 0.99  | 0.99   | 0.98   | 0.98   | 0.98   | 0.97   | 0.97   | 0.96   | 0.95   | 0.94   | 0.93   | 0.91  | 0.89  |
| Iraq    | G4142     | 1              | 0.98 | 0.88 | 0.74 | 0.62  | 0.52  | 0.45   | 0.38   | 0.33   | 0.30   | 0.27   | 0.21   | 0.15   | 0.11   | 0.11   | 0.12   | 0.14  | 0.12  |
| Iraq    | G4164     | 1              | 1.00 | 0.98 | 0.94 | 0.87  | 0.80  | 0.74   | 0.70   | 0.66   | 0.62   | 0.60   | 0.57   | 0.53   | 0.49   | 0.48   | 0.47   | 0.49  | 0.46  |
| Iraq    | G4165     | 1              | 1.00 | 0.99 | 0.97 | 0.95  | 0.93  | 0.90   | 0.87   | 0.85   | 0.83   | 0.80   | 0.78   | 0.75   | 0.73   | 0.71   | 0.70   | 0.70  | 0.70  |
| Iraq    | G4214     | 1              | 1.00 | 0.99 | 0.96 | 0.93  | 0.90  | 0.87   | 0.83   | 0.78   | 0.74   | 0.69   | 0.60   | 0.52   | 0.47   | 0.41   | 0.37   | 0.31  | 0.26  |
| Iraq    | G4221     | 1              | 1.00 | 0.99 | 0.99 | 0.99  | 0.99  | 0.99   | 0.99   | 0.98   | 0.98   | 0.98   | 0.98   | 0.98   | 0.98   | 0.98   | 0.98   | 0.97  | 0.97  |
| Iraq    | G4222     | 1              | 1.00 | 1.00 | 1.00 | 0.98  | 0.96  | 0.91   | 0.86   | 0.81   | 0.77   | 0.72   | 0.67   | 0.63   | 0.60   | 0.56   | 0.54   | 0.53  | 0.52  |
| Iraq    | G4225     | 1              | 1.00 | 0.99 | 0.98 | 0.97  | 0.95  | 0.92   | 0.91   | 0.91   | 0.91   | 0.91   | 0.90   | 0.89   | 0.87   | 0.86   | 0.84   | 0.79  | 0.73  |
| Iraq    | G4239     | 1              | 1.00 | 1.00 | 1.00 | 1.00  | 1.00  | 1.00   | 0.99   | 0.99   | 0.99   | 0.99   | 0.99   | 0.99   | 0.98   | 0.98   | 0.98   | 0.98  | 0.97  |
| Iraq    | G4240     | 1              | 0.98 | 0.93 | 0.87 | 0.81  | 0.75  | 0.71   | 0.65   | 0.61   | 0.57   | 0.54   | 0.48   | 0.44   | 0.41   | 0.44   | 0.44   | 0.42  | 0.39  |
| Iraq    | G4241     | 1              | 1.00 | 1.00 | 1.00 | 1.00  | 0.99  | 0.99   | 0.97   | 0.95   | 0.91   | 0.87   | 0.79   | 0.72   | 0.67   | 0.63   | 0.59   | 0.54  | 0.53  |
| Iraq    | G4243     | 1              | 1.00 | 1.00 | 1.00 | 1.00  | 0.99  | 0.98   | 0.98   | 0.97   | 0.96   | 0.95   | 0.92   | 0.89   | 0.86   | 0.82   | 0.79   | 0.73  | 0.67  |
| Iraq    | G4257     | 1              | 0.96 | 0.85 | 0.57 | -2.57 | -9.44 | -16.82 | -19.70 | -21.20 | -28.70 | -32.36 | -28.61 | -25.66 | -26.48 | -19.58 | -15.39 | -6.31 | -2.60 |
| Iraq    | G4258     | 1              | 1.00 | 1.00 | 1.00 | 1.00  | 1.00  | 1.00   | 1.00   | 1.00   | 1.00   | 0.99   | 0.99   | 0.99   | 0.99   | 0.99   | 0.98   | 0.98  | 0.98  |

| Country                            | GloFAS ID | Station filter | LT1  | LT2  | LT3  | LT4  | LT5  | LT6  | LT7   | LT8   | LT9   | LT10  | LT12  | LT14  | LT16  | LT18  | LT20  | LT25  | L30   |
|------------------------------------|-----------|----------------|------|------|------|------|------|------|-------|-------|-------|-------|-------|-------|-------|-------|-------|-------|-------|
| Iraq                               | G4259     | 1              | 1.00 | 0.99 | 0.98 | 0.96 | 0.94 | 0.91 | 0.88  | 0.85  | 0.82  | 0.79  | 0.74  | 0.67  | 0.62  | 0.57  | 0.54  | 0.47  | 0.42  |
| Iraq                               | G4264     | 1              | 0.99 | 0.97 | 0.93 | 0.90 | 0.89 | 0.85 | 0.84  | 0.84  | 0.83  | 0.82  | 0.79  | 0.73  | 0.68  | 0.63  | 0.60  | 0.50  | 0.42  |
| Iraq                               | G4265     | 1              | 1.00 | 1.00 | 1.00 | 1.00 | 1.00 | 1.00 | 1.00  | 1.00  | 0.99  | 0.99  | 0.97  | 0.93  | 0.89  | 0.83  | 0.78  | 0.68  | 0.61  |
| Iraq                               | G4293     | 1              | 1.00 | 1.00 | 1.00 | 1.00 | 1.00 | 1.00 | 1.00  | 1.00  | 1.00  | 1.00  | 0.99  | 0.99  | 0.99  | 0.99  | 0.99  | 0.98  | 0.98  |
| Iraq                               | G4307     | 1              | 0.99 | 0.99 | 0.98 | 0.97 | 0.96 | 0.94 | 0.93  | 0.91  | 0.90  | 0.88  | 0.84  | 0.80  | 0.77  | 0.73  | 0.69  | 0.60  | 0.53  |
| Iraq                               | G4308     | 1              | 1.00 | 1.00 | 1.00 | 1.00 | 1.00 | 1.00 | 1.00  | 1.00  | 1.00  | 1.00  | 1.00  | 0.99  | 0.99  | 0.99  | 0.99  | 0.99  | 0.98  |
| Iraq                               | G4315     | 1              | 1.00 | 0.99 | 0.99 | 0.98 | 0.98 | 0.98 | 0.97  | 0.96  | 0.95  | 0.92  | 0.88  | 0.83  | 0.78  | 0.71  | 0.65  | 0.53  | 0.43  |
| Iraq                               | G4327     | 1              | 1.00 | 1.00 | 1.00 | 1.00 | 1.00 | 1.00 | 1.00  | 1.00  | 1.00  | 1.00  | 1.00  | 1.00  | 0.99  | 0.99  | 0.99  | 0.99  | 0.99  |
| Iraq                               | G4328     | 1              | 1.00 | 0.99 | 0.98 | 0.98 | 0.98 | 0.96 | 0.95  | 0.93  | 0.86  | 0.79  | 0.63  | 0.51  | 0.39  | 0.30  | 0.23  | 0.21  | 0.18  |
| Iraq                               | G4329     | 1              | 1.00 | 0.99 | 0.99 | 0.99 | 0.98 | 0.98 | 0.98  | 0.97  | 0.97  | 0.97  | 0.96  | 0.95  | 0.94  | 0.92  | 0.88  | 0.79  | 0.69  |
| Iraq                               | G4330     | 1              | 1.00 | 0.99 | 0.99 | 0.99 | 0.98 | 0.98 | 0.97  | 0.97  | 0.97  | 0.96  | 0.95  | 0.93  | 0.92  | 0.89  | 0.86  | 0.76  | 0.67  |
| Iraq                               | G4332     | 1              | 1.00 | 1.00 | 0.99 | 0.96 | 0.92 | 0.87 | 0.82  | 0.76  | 0.71  | 0.66  | 0.59  | 0.52  | 0.47  | 0.42  | 0.37  | 0.28  | 0.23  |
| Iraq                               | G4333     | 1              | 0.98 | 0.97 | 0.96 | 0.95 | 0.94 | 0.94 | 0.94  | 0.93  | 0.93  | 0.93  | 0.92  | 0.93  | 0.92  | 0.92  | 0.92  | 0.91  | 0.91  |
| Iraq                               | G4348     | 1              | 1.00 | 0.99 | 0.90 | 0.82 | 0.79 | 0.79 | 0.77  | 0.76  | 0.76  | 0.68  | 0.58  | 0.55  | 0.49  | 0.41  | 0.48  | 0.37  | 0.43  |
| Iraq                               | G4349     | 1              | 1.00 | 0.99 | 0.98 | 0.98 | 0.97 | 0.97 | 0.96  | 0.96  | 0.96  | 0.95  | 0.94  | 0.93  | 0.92  | 0.91  | 0.88  | 0.81  | 0.74  |
| Iraq                               | G4358     | 1              | 1.00 | 0.99 | 0.99 | 0.98 | 0.97 | 0.97 | 0.96  | 0.96  | 0.96  | 0.95  | 0.94  | 0.93  | 0.92  | 0.91  | 0.89  | 0.83  | 0.75  |
| Israel                             | G0864     | 1              | 0.88 | 0.79 | 0.71 | 0.64 | 0.59 | 0.51 | 0.44  | 0.34  | 0.29  | 0.28  | 0.16  | 0.09  | 0.05  | 0.05  | 0.04  | 0.05  | 0.02  |
| Israel                             | G0875     | 1              | 0.97 | 0.92 | 0.89 | 0.86 | 0.83 | 0.80 | 0.76  | 0.72  | 0.68  | 0.64  | 0.58  | 0.51  | 0.47  | 0.41  | 0.41  | 0.33  | 0.29  |
| Jammu Kashmir (disputed territory) | G4143     | 1              | 0.81 | 0.51 | 0.36 | 0.29 | 0.27 | 0.26 | 0.26  | 0.25  | 0.22  | 0.20  | 0.15  | 0.12  | 0.11  | 0.13  | 0.04  | -0.03 | -0.08 |
| Jammu Kashmir (disputed territory) | G4151     | 1              | 0.86 | 0.57 | 0.42 | 0.36 | 0.32 | 0.26 | 0.19  | 0.13  | 0.07  | 0.02  | -0.08 | -0.16 | -0.18 | -0.20 | -0.27 | -0.41 | -0.59 |
| Jammu Kashmir (disputed territory) | G4155     | 1              | 0.97 | 0.84 | 0.69 | 0.60 | 0.58 | 0.57 | 0.56  | 0.55  | 0.54  | 0.52  | 0.48  | 0.42  | 0.39  | 0.35  | 0.28  | 0.16  | 0.11  |
| Jammu Kashmir (disputed territory) | G4167     | 1              | 0.90 | 0.72 | 0.63 | 0.59 | 0.57 | 0.55 | 0.53  | 0.51  | 0.49  | 0.47  | 0.39  | 0.35  | 0.31  | 0.25  | 0.20  | 0.13  | 0.10  |
| Jammu Kashmir (disputed territory) | G4171     | 1              | 0.90 | 0.74 | 0.64 | 0.59 | 0.56 | 0.54 | 0.52  | 0.51  | 0.49  | 0.47  | 0.40  | 0.34  | 0.29  | 0.19  | 0.10  | -0.01 | -0.08 |
| Jammu Kashmir (disputed territory) | G4191     | 1              | 0.78 | 0.53 | 0.44 | 0.40 | 0.39 | 0.38 | 0.37  | 0.37  | 0.36  | 0.36  | 0.33  | 0.32  | 0.31  | 0.26  | 0.23  | 0.19  | 0.11  |
| Jammu Kashmir (disputed territory) | G4192     | 1              | 0.94 | 0.82 | 0.69 | 0.59 | 0.54 | 0.49 | 0.44  | 0.39  | 0.35  | 0.31  | 0.21  | 0.12  | 0.02  | -0.13 | -0.25 | -0.35 | -0.40 |
| Jammu Kashmir (disputed territory) | G4216     | 1              | 0.97 | 0.90 | 0.83 | 0.76 | 0.70 | 0.66 | 0.63  | 0.60  | 0.57  | 0.54  | 0.48  | 0.42  | 0.36  | 0.26  | 0.20  | 0.12  | 0.03  |
| Jammu Kashmir (disputed territory) | G4217     | 1              | 0.95 | 0.84 | 0.73 | 0.63 | 0.56 | 0.51 | 0.47  | 0.43  | 0.41  | 0.37  | 0.32  | 0.26  | 0.21  | 0.18  | 0.20  | 0.22  | 0.13  |
| Jammu Kashmir (disputed territory) | G4223     | 1              | 0.89 | 0.66 | 0.52 | 0.45 | 0.40 | 0.35 | 0.29  | 0.24  | 0.19  | 0.13  | 0.00  | -0.10 | -0.22 | -0.36 | -0.46 | -0.56 | -0.59 |
| Jammu Kashmir (disputed territory) | G4224     | 1              | 0.95 | 0.89 | 0.85 | 0.82 | 0.80 | 0.77 | 0.75  | 0.72  | 0.70  | 0.67  | 0.63  | 0.58  | 0.55  | 0.51  | 0.47  | 0.39  | 0.33  |
| Japan                              | G0651     | 1              | 0.96 | 0.87 | 0.66 | 0.44 | 0.29 | 0.19 | 0.12  | 0.06  | 0.04  | 0.01  | -0.03 | -0.06 | -0.08 | -0.10 | -0.12 | -0.14 | -0.17 |
| Japan                              | G0823     | 1              | 0.98 | 0.91 | 0.82 | 0.75 | 0.67 | 0.58 | 0.52  | 0.48  | 0.44  | 0.39  | 0.32  | 0.26  | 0.22  | 0.18  | 0.15  | 0.10  | 0.07  |
| Jordan                             | G0881     | 1              | 0.93 | 0.84 | 0.78 | 0.72 | 0.67 | 0.60 | 0.55  | 0.51  | 0.45  | 0.41  | 0.37  | 0.32  | 0.25  | 0.23  | 0.19  | 0.12  | 0.07  |
| Kazakhstan                         | G0328     | 1              | 0.99 | 0.92 | 0.79 | 0.62 | 0.47 | 0.37 | 0.29  | 0.22  | 0.16  | 0.11  | 0.03  | -0.02 | -0.05 | -0.08 | -0.10 | -0.10 | -0.11 |
| Kazakhstan                         | G0360     | 1              | 1.00 | 0.99 | 0.98 | 0.97 | 0.95 | 0.88 | 0.77  | 0.66  | 0.57  | 0.50  | 0.42  | 0.38  | 0.36  | 0.35  | 0.33  | 0.29  | 0.25  |
| Kazakhstan                         | G0364     | 1              | 1.00 | 1.00 | 0.99 | 0.99 | 0.98 | 0.98 | 0.97  | 0.97  | 0.96  | 0.94  | 0.91  | 0.88  | 0.85  | 0.82  | 0.80  | 0.74  | 0.69  |
| Kazakhstan                         | G0478     | 1              | 0.97 | 0.81 | 0.57 | 0.37 | 0.19 | 0.05 | -0.06 | -0.13 | -0.20 | -0.25 | -0.33 | -0.40 | -0.42 | -0.36 | -0.31 | -0.25 | -0.25 |
| Kazakhstan                         | G0629     | 1              | 1.00 | 1.00 | 0.99 | 0.98 | 0.96 | 0.92 | 0.88  | 0.83  | 0.77  | 0.71  | 0.61  | 0.52  | 0.46  | 0.39  | 0.32  | 0.19  | 0.08  |
| Kazakhstan                         | G1917     | 1              | 0.96 | 0.81 | 0.63 | 0.48 | 0.36 | 0.27 | 0.21  | 0.16  | 0.11  | 0.07  | 0.00  | -0.03 | -0.06 | -0.08 | -0.09 | -0.09 | -0.09 |
| Kazakhstan                         | G3299     | 1              | 0.99 | 0.92 | 0.83 | 0.76 | 0.67 | 0.55 | 0.47  | 0.42  | 0.35  | 0.27  | 0.19  | 0.12  | 0.07  | 0.03  | 0.01  | 0.00  | 0.00  |

| Country    | GloFAS ID | Station filter | LT1  | LT2  | LT3  | LT4  | LT5  | LT6  | LT7  | LT8  | LT9  | LT10  | LT12  | LT14  | LT16  | LT18  | LT20  | LT25  | L30   |
|------------|-----------|----------------|------|------|------|------|------|------|------|------|------|-------|-------|-------|-------|-------|-------|-------|-------|
| Kazakhstan | G3305     | 1              | 0.99 | 0.98 | 0.94 | 0.90 | 0.85 | 0.80 | 0.75 | 0.69 | 0.64 | 0.59  | 0.50  | 0.44  | 0.38  | 0.33  | 0.30  | 0.22  | 0.15  |
| Kazakhstan | G3307     | 1              | 0.99 | 0.95 | 0.87 | 0.80 | 0.74 | 0.68 | 0.64 | 0.60 | 0.57 | 0.51  | 0.48  | 0.43  | 0.41  | 0.37  | 0.34  | 0.30  | 0.27  |
| Kazakhstan | G3323     | 1              | 0.98 | 0.91 | 0.85 | 0.81 | 0.77 | 0.73 | 0.71 | 0.68 | 0.64 | 0.61  | 0.59  | 0.56  | 0.53  | 0.52  | 0.48  | 0.46  | 0.42  |
| Kazakhstan | G3367     | 1              | 0.99 | 0.92 | 0.80 | 0.74 | 0.69 | 0.62 | 0.55 | 0.53 | 0.48 | 0.42  | 0.39  | 0.32  | 0.31  | 0.29  | 0.27  | 0.24  | 0.21  |
| Kazakhstan | G3375     | 1              | 0.99 | 0.95 | 0.90 | 0.82 | 0.75 | 0.69 | 0.62 | 0.56 | 0.51 | 0.47  | 0.39  | 0.32  | 0.27  | 0.23  | 0.21  | 0.17  | 0.18  |
| Kazakhstan | G3432     | 1              | 0.78 | 0.54 | 0.36 | 0.25 | 0.16 | 0.12 | 0.08 | 0.04 | 0.02 | -0.01 | -0.04 | -0.05 | -0.07 | -0.06 | -0.06 | -0.07 | -0.07 |
| Kazakhstan | G3433     | 1              | 0.92 | 0.71 | 0.54 | 0.43 | 0.33 | 0.27 | 0.25 | 0.21 | 0.15 | 0.13  | 0.08  | 0.07  | 0.04  | 0.06  | 0.05  | 0.06  | 0.04  |
| Kazakhstan | G3442     | 1              | 0.95 | 0.80 | 0.65 | 0.51 | 0.40 | 0.33 | 0.29 | 0.25 | 0.18 | 0.14  | 0.09  | 0.06  | 0.03  | 0.03  | 0.01  | 0.01  | 0.01  |
| Kazakhstan | G3443     | 1              | 0.94 | 0.84 | 0.72 | 0.59 | 0.50 | 0.45 | 0.42 | 0.35 | 0.29 | 0.26  | 0.19  | 0.18  | 0.14  | 0.11  | 0.09  | 0.08  | 0.07  |
| Kazakhstan | G3458     | 1              | 1.00 | 1.00 | 1.00 | 0.99 | 0.99 | 0.98 | 0.97 | 0.95 | 0.93 | 0.92  | 0.87  | 0.83  | 0.81  | 0.77  | 0.74  | 0.70  | 0.65  |
| Kazakhstan | G3459     | 1              | 1.00 | 1.00 | 0.99 | 0.98 | 0.98 | 0.97 | 0.96 | 0.93 | 0.90 | 0.88  | 0.83  | 0.80  | 0.74  | 0.69  | 0.65  | 0.56  | 0.50  |
| Kazakhstan | G3465     | 1              | 0.95 | 0.80 | 0.63 | 0.48 | 0.35 | 0.26 | 0.20 | 0.15 | 0.11 | 0.06  | 0.00  | -0.04 | -0.06 | -0.08 | -0.09 | -0.09 | -0.09 |
| Kazakhstan | G3475     | 1              | 0.92 | 0.75 | 0.58 | 0.45 | 0.37 | 0.32 | 0.28 | 0.23 | 0.19 | 0.17  | 0.10  | 0.09  | 0.07  | 0.05  | 0.03  | 0.05  | 0.05  |
| Kazakhstan | G3508     | 1              | 1.00 | 1.00 | 0.99 | 0.98 | 0.97 | 0.96 | 0.95 | 0.93 | 0.92 | 0.89  | 0.83  | 0.76  | 0.71  | 0.65  | 0.60  | 0.49  | 0.36  |
| Kazakhstan | G3514     | 1              | 1.00 | 0.99 | 0.97 | 0.91 | 0.79 | 0.67 | 0.58 | 0.51 | 0.47 | 0.44  | 0.40  | 0.38  | 0.37  | 0.36  | 0.34  | 0.31  | 0.27  |
| Kazakhstan | G3515     | 1              | 0.99 | 0.94 | 0.76 | 0.54 | 0.39 | 0.28 | 0.21 | 0.16 | 0.13 | 0.11  | 0.06  | 0.04  | 0.01  | -0.02 | -0.01 | -0.03 | -0.06 |
| Kazakhstan | G3527     | 1              | 0.98 | 0.89 | 0.79 | 0.69 | 0.59 | 0.52 | 0.48 | 0.46 | 0.40 | 0.36  | 0.29  | 0.25  | 0.21  | 0.18  | 0.16  | 0.15  | 0.16  |
| Kazakhstan | G3528     | 1              | 0.98 | 0.88 | 0.80 | 0.69 | 0.54 | 0.47 | 0.47 | 0.42 | 0.39 | 0.41  | 0.34  | 0.32  | 0.25  | 0.20  | 0.13  | 0.03  | 0.00  |
| Kazakhstan | G3529     | 1              | 0.99 | 0.94 | 0.83 | 0.72 | 0.64 | 0.58 | 0.55 | 0.52 | 0.50 | 0.49  | 0.47  | 0.47  | 0.45  | 0.44  | 0.44  | 0.39  | 0.35  |
| Kazakhstan | G3536     | 1              | 0.96 | 0.84 | 0.71 | 0.59 | 0.50 | 0.43 | 0.42 | 0.39 | 0.33 | 0.29  | 0.24  | 0.21  | 0.17  | 0.15  | 0.14  | 0.15  | 0.15  |
| Kazakhstan | G3537     | 1              | 0.98 | 0.91 | 0.84 | 0.75 | 0.66 | 0.60 | 0.55 | 0.53 | 0.47 | 0.44  | 0.36  | 0.31  | 0.28  | 0.25  | 0.23  | 0.20  | 0.21  |
| Kazakhstan | G3546     | 1              | 1.00 | 0.99 | 0.98 | 0.95 | 0.89 | 0.82 | 0.75 | 0.65 | 0.56 | 0.49  | 0.34  | 0.23  | 0.14  | 0.08  | 0.02  | -0.06 | -0.09 |
| Kazakhstan | G3548     | 1              | 1.00 | 0.99 | 0.98 | 0.97 | 0.95 | 0.90 | 0.79 | 0.68 | 0.59 | 0.52  | 0.38  | 0.26  | 0.16  | 0.09  | 0.03  | -0.08 | -0.13 |
| Kazakhstan | G3549     | 1              | 0.94 | 0.78 | 0.68 | 0.59 | 0.55 | 0.49 | 0.44 | 0.39 | 0.36 | 0.35  | 0.26  | 0.24  | 0.17  | 0.20  | 0.18  | 0.18  | 0.15  |
| Kazakhstan | G3550     | 1              | 0.98 | 0.90 | 0.80 | 0.72 | 0.60 | 0.50 | 0.44 | 0.40 | 0.36 | 0.36  | 0.33  | 0.33  | 0.26  | 0.26  | 0.23  | 0.23  | 0.19  |
| Kazakhstan | G3565     | 1              | 1.00 | 0.98 | 0.95 | 0.93 | 0.91 | 0.87 | 0.81 | 0.76 | 0.70 | 0.61  | 0.46  | 0.31  | 0.24  | 0.22  | 0.17  | 0.10  | 0.11  |
| Kazakhstan | G3572     | 1              | 0.99 | 0.95 | 0.88 | 0.80 | 0.73 | 0.66 | 0.57 | 0.52 | 0.49 | 0.43  | 0.33  | 0.30  | 0.29  | 0.26  | 0.25  | 0.22  | 0.18  |
| Kazakhstan | G3580     | 1              | 1.00 | 0.98 | 0.96 | 0.91 | 0.86 | 0.80 | 0.75 | 0.70 | 0.64 | 0.60  | 0.53  | 0.48  | 0.43  | 0.40  | 0.37  | 0.33  | 0.29  |
| Kazakhstan | G3591     | 1              | 1.00 | 1.00 | 0.99 | 0.98 | 0.94 | 0.90 | 0.86 | 0.83 | 0.79 | 0.76  | 0.72  | 0.68  | 0.64  | 0.63  | 0.60  | 0.58  | 0.54  |
| Kazakhstan | G3609     | 1              | 1.00 | 1.00 | 1.00 | 0.99 | 0.99 | 0.98 | 0.96 | 0.94 | 0.92 | 0.90  | 0.85  | 0.81  | 0.75  | 0.70  | 0.64  | 0.54  | 0.49  |
| Kazakhstan | G3610     | 1              | 1.00 | 1.00 | 1.00 | 1.00 | 0.99 | 0.99 | 0.97 | 0.95 | 0.92 | 0.88  | 0.81  | 0.73  | 0.67  | 0.61  | 0.56  | 0.47  | 0.43  |
| Kazakhstan | G3611     | 1              | 1.00 | 1.00 | 1.00 | 0.99 | 0.98 | 0.96 | 0.95 | 0.92 | 0.89 | 0.85  | 0.78  | 0.71  | 0.63  | 0.57  | 0.52  | 0.44  | 0.40  |
| Kazakhstan | G3617     | 1              | 1.00 | 1.00 | 1.00 | 1.00 | 1.00 | 1.00 | 0.99 | 0.99 | 0.99 | 0.99  | 0.99  | 0.98  | 0.98  | 0.97  | 0.96  | 0.90  | 0.84  |
| Kazakhstan | G3618     | 1              | 1.00 | 1.00 | 1.00 | 1.00 | 0.99 | 0.98 | 0.96 | 0.94 | 0.91 | 0.87  | 0.80  | 0.73  | 0.65  | 0.59  | 0.54  | 0.45  | 0.40  |
| Kazakhstan | G3623     | 1              | 1.00 | 1.00 | 1.00 | 0.99 | 0.99 | 0.99 | 0.98 | 0.97 | 0.96 | 0.94  | 0.90  | 0.87  | 0.83  | 0.79  | 0.74  | 0.63  | 0.57  |
| Kazakhstan | G3634     | 1              | 1.00 | 1.00 | 1.00 | 1.00 | 0.99 | 0.99 | 0.98 | 0.96 | 0.94 | 0.91  | 0.83  | 0.74  | 0.67  | 0.62  | 0.56  | 0.45  | 0.37  |
| Kazakhstan | G3637     | 1              | 1.00 | 1.00 | 1.00 | 1.00 | 1.00 | 0.99 | 0.98 | 0.97 | 0.96 | 0.93  | 0.87  | 0.82  | 0.76  | 0.69  | 0.64  | 0.53  | 0.48  |
| Kazakhstan | G3638     | 1              | 1.00 | 1.00 | 1.00 | 1.00 | 1.00 | 1.00 | 0.99 | 0.99 | 0.99 | 0.99  | 0.95  | 0.91  | 0.86  | 0.83  | 0.77  | 0.66  | 0.55  |
| Kazakhstan | G3639     | 1              | 0.99 | 0.96 | 0.89 | 0.80 | 0.73 | 0.68 | 0.62 | 0.57 | 0.55 | 0.53  | 0.44  | 0.41  | 0.36  | 0.35  | 0.30  | 0.26  | 0.22  |

| Country    | GloFAS ID | Station filter | LT1  | LT2  | LT3  | LT4  | LT5  | LT6  | LT7   | LT8   | LT9   | LT10  | LT12  | LT14  | LT16  | LT18  | LT20  | LT25  | L30   |
|------------|-----------|----------------|------|------|------|------|------|------|-------|-------|-------|-------|-------|-------|-------|-------|-------|-------|-------|
| Kazakhstan | G3645     | 1              | 1.00 | 1.00 | 0.99 | 0.99 | 0.98 | 0.97 | 0.96  | 0.94  | 0.91  | 0.87  | 0.72  | 0.57  | 0.46  | 0.33  | 0.23  | 0.05  | -0.07 |
| Kazakhstan | G3651     | 1              | 1.00 | 1.00 | 0.99 | 0.99 | 0.99 | 0.98 | 0.96  | 0.93  | 0.90  | 0.86  | 0.80  | 0.75  | 0.68  | 0.62  | 0.58  | 0.50  | 0.46  |
| Kazakhstan | G3661     | 1              | 0.99 | 0.98 | 0.96 | 0.95 | 0.93 | 0.92 | 0.91  | 0.89  | 0.87  | 0.85  | 0.81  | 0.76  | 0.71  | 0.65  | 0.61  | 0.47  | 0.35  |
| Kazakhstan | G3667     | 1              | 1.00 | 1.00 | 1.00 | 1.00 | 0.99 | 0.99 | 0.99  | 0.98  | 0.98  | 0.97  | 0.95  | 0.90  | 0.84  | 0.73  | 0.62  | 0.38  | 0.18  |
| Kazakhstan | G3674     | 1              | 1.00 | 0.95 | 0.80 | 0.61 | 0.42 | 0.26 | 0.11  | 0.00  | -0.08 | -0.16 | -0.25 | -0.35 | -0.40 | -0.41 | -0.37 | -0.28 | -0.26 |
| Kazakhstan | G3690     | 1              | 0.99 | 0.92 | 0.80 | 0.68 | 0.61 | 0.51 | 0.45  | 0.42  | 0.37  | 0.33  | 0.30  | 0.25  | 0.22  | 0.19  | 0.17  | 0.18  | 0.18  |
| Kazakhstan | G3696     | 1              | 1.00 | 0.99 | 0.98 | 0.95 | 0.92 | 0.88 | 0.83  | 0.77  | 0.72  | 0.65  | 0.54  | 0.45  | 0.37  | 0.30  | 0.26  | 0.15  | 0.10  |
| Kazakhstan | G3697     | 1              | 0.98 | 0.87 | 0.74 | 0.61 | 0.50 | 0.43 | 0.41  | 0.37  | 0.32  | 0.30  | 0.22  | 0.21  | 0.15  | 0.17  | 0.12  | 0.15  | 0.14  |
| Kazakhstan | G3698     | 1              | 1.00 | 1.00 | 0.98 | 0.93 | 0.86 | 0.80 | 0.70  | 0.61  | 0.57  | 0.53  | 0.43  | 0.34  | 0.30  | 0.26  | 0.23  | 0.15  | 0.13  |
| Kazakhstan | G3709     | 1              | 0.99 | 0.96 | 0.94 | 0.90 | 0.87 | 0.84 | 0.81  | 0.77  | 0.74  | 0.71  | 0.65  | 0.59  | 0.54  | 0.51  | 0.48  | 0.43  | 0.40  |
| Kazakhstan | G3714     | 1              | 0.99 | 0.97 | 0.94 | 0.90 | 0.85 | 0.80 | 0.75  | 0.70  | 0.65  | 0.60  | 0.51  | 0.42  | 0.35  | 0.31  | 0.28  | 0.22  | 0.19  |
| Kazakhstan | G3719     | 1              | 0.98 | 0.94 | 0.85 | 0.75 | 0.66 | 0.58 | 0.51  | 0.42  | 0.36  | 0.32  | 0.23  | 0.17  | 0.12  | 0.09  | 0.05  | 0.01  | -0.01 |
| Kazakhstan | G3726     | 1              | 0.98 | 0.95 | 0.90 | 0.83 | 0.77 | 0.69 | 0.61  | 0.54  | 0.49  | 0.45  | 0.36  | 0.30  | 0.26  | 0.22  | 0.18  | 0.13  | 0.10  |
| Kazakhstan | G3727     | 1              | 0.98 | 0.94 | 0.92 | 0.88 | 0.83 | 0.78 | 0.70  | 0.63  | 0.58  | 0.52  | 0.40  | 0.31  | 0.23  | 0.16  | 0.12  | 0.03  | 0.03  |
| Kazakhstan | G3733     | 1              | 0.98 | 0.93 | 0.84 | 0.71 | 0.61 | 0.56 | 0.50  | 0.40  | 0.37  | 0.37  | 0.28  | 0.26  | 0.21  | 0.22  | 0.19  | 0.19  | 0.16  |
| Kazakhstan | G3743     | 1              | 0.99 | 0.97 | 0.83 | 0.58 | 0.33 | 0.09 | -0.11 | -0.24 | -0.35 | -0.44 | -0.54 | -0.62 | -0.66 | -0.68 | -0.66 | -0.47 | -0.44 |
| Kazakhstan | G3775     | 1              | 1.00 | 0.98 | 0.95 | 0.92 | 0.90 | 0.87 | 0.84  | 0.83  | 0.81  | 0.78  | 0.74  | 0.71  | 0.69  | 0.65  | 0.63  | 0.60  | 0.58  |
| Kazakhstan | G3783     | 1              | 1.00 | 1.00 | 1.00 | 0.99 | 0.99 | 0.99 | 0.98  | 0.98  | 0.97  | 0.95  | 0.89  | 0.80  | 0.69  | 0.60  | 0.53  | 0.38  | 0.25  |
| Kazakhstan | G3798     | 1              | 1.00 | 1.00 | 0.99 | 0.99 | 0.99 | 0.99 | 0.98  | 0.98  | 0.97  | 0.96  | 0.95  | 0.96  | 0.96  | 0.97  | 0.97  | 0.98  | 0.98  |
| Kazakhstan | G3799     | 1              | 1.00 | 1.00 | 1.00 | 1.00 | 1.00 | 1.00 | 0.99  | 0.99  | 0.99  | 0.98  | 0.95  | 0.89  | 0.79  | 0.70  | 0.61  | 0.45  | 0.31  |
| Kazakhstan | G3808     | 1              | 1.00 | 1.00 | 0.99 | 0.98 | 0.98 | 0.97 | 0.96  | 0.96  | 0.95  | 0.94  | 0.93  | 0.92  | 0.91  | 0.90  | 0.90  | 0.87  | 0.86  |
| Kazakhstan | G3816     | 0              | -    | -    | -    | -    | -    | -    | -     | -     | -     | -     | -     | -     | -     | -     | -     | -     | -     |
| Kazakhstan | G3840     | 1              | 1.00 | 0.96 | 0.85 | 0.70 | 0.52 | 0.35 | 0.22  | 0.12  | 0.05  | -0.01 | -0.08 | -0.16 | -0.23 | -0.29 | -0.38 | -0.50 | -0.52 |
| Kazakhstan | G3841     | 1              | 0.99 | 0.94 | 0.87 | 0.79 | 0.71 | 0.61 | 0.50  | 0.38  | 0.25  | 0.12  | -0.11 | -0.32 | -0.50 | -0.62 | -0.70 | -0.77 | -0.74 |
| Kazakhstan | G3845     | 1              | 1.00 | 1.00 | 0.99 | 0.98 | 0.95 | 0.90 | 0.84  | 0.77  | 0.70  | 0.65  | 0.55  | 0.46  | 0.38  | 0.32  | 0.22  | -0.02 | -0.02 |
| Kazakhstan | G3848     | 1              | 1.00 | 1.00 | 1.00 | 0.99 | 0.99 | 0.98 | 0.96  | 0.94  | 0.90  | 0.85  | 0.73  | 0.63  | 0.55  | 0.48  | 0.41  | 0.26  | 0.15  |
| Kazakhstan | G3849     | 1              | 1.00 | 0.98 | 0.90 | 0.73 | 0.53 | 0.36 | 0.23  | 0.15  | 0.10  | 0.06  | 0.00  | -0.07 | -0.13 | -0.16 | -0.16 | -0.08 | -0.10 |
| Kazakhstan | G3852     | 1              | 1.00 | 0.99 | 0.98 | 0.98 | 0.97 | 0.96 | 0.96  | 0.95  | 0.94  | 0.94  | 0.91  | 0.89  | 0.86  | 0.83  | 0.81  | 0.76  | 0.73  |
| Kazakhstan | G3853     | 1              | 1.00 | 0.91 | 0.68 | 0.44 | 0.26 | 0.13 | 0.06  | 0.04  | 0.01  | -0.02 | -0.07 | -0.15 | -0.18 | -0.22 | -0.19 | -0.12 | -0.15 |
| Kazakhstan | G3854     | 1              | 0.99 | 0.90 | 0.72 | 0.52 | 0.32 | 0.16 | 0.06  | -0.01 | -0.07 | -0.12 | -0.21 | -0.28 | -0.31 | -0.34 | -0.40 | -0.48 | -0.49 |
| Kazakhstan | G3855     | 1              | 0.98 | 0.79 | 0.53 | 0.35 | 0.20 | 0.06 | -0.07 | -0.19 | -0.31 | -0.42 | -0.62 | -0.79 | -0.92 | -1.01 | -1.04 | -1.07 | -1.05 |
| Kazakhstan | G3859     | 1              | 1.00 | 1.00 | 0.99 | 0.99 | 0.99 | 0.99 | 0.99  | 0.98  | 0.98  | 0.97  | 0.97  | 0.96  | 0.95  | 0.94  | 0.93  | 0.90  | 0.86  |
| Kazakhstan | G3860     | 1              | 0.99 | 0.93 | 0.78 | 0.61 | 0.46 | 0.34 | 0.26  | 0.19  | 0.15  | 0.11  | 0.05  | 0.00  | -0.04 | -0.04 | -0.02 | -0.04 | -0.06 |
| Kazakhstan | G3879     | 1              | 1.00 | 1.00 | 1.00 | 0.99 | 0.97 | 0.95 | 0.91  | 0.87  | 0.81  | 0.75  | 0.64  | 0.55  | 0.48  | 0.41  | 0.35  | 0.21  | 0.10  |
| Kazakhstan | G3880     | 1              | 0.99 | 0.94 | 0.89 | 0.83 | 0.78 | 0.74 | 0.70  | 0.67  | 0.63  | 0.60  | 0.55  | 0.50  | 0.45  | 0.43  | 0.42  | 0.38  | 0.34  |
| Korea      | G0784     | 1              | 0.98 | 0.94 | 0.89 | 0.84 | 0.76 | 0.71 | 0.66  | 0.62  | 0.58  | 0.55  | 0.50  | 0.45  | 0.42  | 0.40  | 0.39  | 0.35  | 0.31  |
| Korea      | G0816     | 1              | 0.96 | 0.87 | 0.79 | 0.71 | 0.64 | 0.56 | 0.51  | 0.46  | 0.40  | 0.40  | 0.35  | 0.33  | 0.30  | 0.30  | 0.27  | 0.22  | 0.18  |
| Korea      | G3888     | 1              | 0.99 | 0.95 | 0.88 | 0.79 | 0.70 | 0.63 | 0.59  | 0.57  | 0.52  | 0.47  | 0.42  | 0.38  | 0.35  | 0.31  | 0.28  | 0.25  | 0.23  |
| Korea      | G3939     | 1              | 0.99 | 0.97 | 0.93 | 0.89 | 0.84 | 0.80 | 0.75  | 0.70  | 0.67  | 0.63  | 0.56  | 0.52  | 0.48  | 0.43  | 0.40  | 0.30  | 0.27  |



| Country                          | GloFAS ID | Station filter | LT1  | LT2  | LT3  | LT4   | LT5   | LT6   | LT7   | LT8   | LT9   | LT10  | LT12  | LT14  | LT16  | LT18  | LT20  | LT25  | L30   |
|----------------------------------|-----------|----------------|------|------|------|-------|-------|-------|-------|-------|-------|-------|-------|-------|-------|-------|-------|-------|-------|
| Korea                            | G4088     | 1              | 0.98 | 0.93 | 0.88 | 0.83  | 0.78  | 0.73  | 0.69  | 0.64  | 0.59  | 0.56  | 0.54  | 0.50  | 0.44  | 0.42  | 0.39  | 0.33  | 0.31  |
| Korea                            | G4090     | 1              | 0.99 | 0.96 | 0.92 | 0.89  | 0.82  | 0.76  | 0.71  | 0.67  | 0.63  | 0.59  | 0.53  | 0.47  | 0.44  | 0.41  | 0.40  | 0.35  | 0.30  |
| Kyrgyzstan                       | G3901     | 1              | 0.74 | 0.31 | 0.02 | -0.17 | -0.27 | -0.32 | -0.35 | -0.37 | -0.38 | -0.40 | -0.44 | -0.46 | -0.43 | -0.22 | -0.12 | -0.08 | -0.06 |
| Kyrgyzstan                       | G3905     | 1              | 0.86 | 0.59 | 0.29 | 0.05  | -0.13 | -0.27 | -0.37 | -0.45 | -0.50 | -0.54 | -0.60 | -0.64 | -0.66 | -0.62 | -0.55 | -0.43 | -0.43 |
| Kyrgyzstan                       | G3922     | 1              | 0.95 | 0.80 | 0.60 | 0.38  | 0.19  | 0.06  | -0.04 | -0.10 | -0.15 | -0.17 | -0.21 | -0.24 | -0.25 | -0.23 | -0.20 | -0.17 | -0.21 |
| Kyrgyzstan                       | G3936     | 1              | 0.96 | 0.77 | 0.50 | 0.24  | 0.01  | -0.15 | -0.26 | -0.34 | -0.39 | -0.43 | -0.49 | -0.53 | -0.56 | -0.49 | -0.45 | -0.45 | -0.54 |
| Lao People's Democratic Republic | G0937     | 1              | 0.97 | 0.91 | 0.82 | 0.73  | 0.65  | 0.58  | 0.50  | 0.44  | 0.39  | 0.33  | 0.23  | 0.16  | 0.11  | 0.07  | 0.03  | -0.02 | -0.04 |
| Lao People's Democratic Republic | G0940     | 1              | 0.99 | 0.96 | 0.92 | 0.87  | 0.79  | 0.71  | 0.63  | 0.56  | 0.50  | 0.44  | 0.32  | 0.22  | 0.13  | 0.07  | 0.03  | -0.06 | -0.11 |
| Lao People's Democratic Republic | G0945     | 1              | 0.89 | 0.76 | 0.67 | 0.59  | 0.52  | 0.47  | 0.42  | 0.37  | 0.34  | 0.31  | 0.23  | 0.17  | 0.13  | 0.11  | 0.06  | -0.03 | -0.10 |
| Lao People's Democratic Republic | G0946     | 1              | 0.96 | 0.88 | 0.80 | 0.73  | 0.67  | 0.62  | 0.58  | 0.53  | 0.50  | 0.46  | 0.40  | 0.34  | 0.28  | 0.25  | 0.20  | 0.11  | 0.02  |
| Lao People's Democratic Republic | G0947     | 1              | 0.93 | 0.83 | 0.74 | 0.66  | 0.60  | 0.54  | 0.48  | 0.45  | 0.41  | 0.37  | 0.30  | 0.24  | 0.21  | 0.17  | 0.14  | 0.06  | 0.01  |
| Lao People's Democratic Republic | G0949     | 1              | 0.99 | 0.95 | 0.88 | 0.81  | 0.75  | 0.68  | 0.62  | 0.58  | 0.54  | 0.50  | 0.43  | 0.36  | 0.30  | 0.25  | 0.22  | 0.11  | 0.03  |
| Lao People's Democratic Republic | G0952     | 1              | 1.00 | 0.97 | 0.94 | 0.91  | 0.86  | 0.80  | 0.73  | 0.65  | 0.58  | 0.51  | 0.39  | 0.27  | 0.16  | 0.09  | 0.03  | -0.07 | -0.14 |
| Lao People's Democratic Republic | G0967     | 1              | 0.99 | 0.96 | 0.91 | 0.85  | 0.80  | 0.75  | 0.72  | 0.67  | 0.62  | 0.58  | 0.49  | 0.42  | 0.36  | 0.29  | 0.24  | 0.15  | 0.10  |
| Lao People's Democratic Republic | G0973     | 1              | 0.80 | 0.62 | 0.52 | 0.42  | 0.37  | 0.34  | 0.30  | 0.25  | 0.23  | 0.21  | 0.15  | 0.12  | 0.09  | 0.07  | 0.06  | 0.06  | 0.06  |
| Lao People's Democratic Republic | G0977     | 1              | 0.91 | 0.73 | 0.60 | 0.49  | 0.41  | 0.36  | 0.31  | 0.26  | 0.23  | 0.19  | 0.12  | 0.08  | 0.03  | -0.03 | -0.06 | -0.08 | -0.08 |
| Lao People's Democratic Republic | G0986     | 1              | 1.00 | 0.99 | 0.98 | 0.96  | 0.94  | 0.91  | 0.87  | 0.84  | 0.79  | 0.74  | 0.64  | 0.53  | 0.43  | 0.32  | 0.21  | 0.03  | -0.07 |
| Lao People's Democratic Republic | G0989     | 1              | 0.98 | 0.89 | 0.80 | 0.69  | 0.60  | 0.52  | 0.46  | 0.40  | 0.35  | 0.30  | 0.21  | 0.15  | 0.09  | 0.07  | 0.07  | 0.04  | 0.03  |
| Lao People's Democratic Republic | G1779     | 1              | 1.00 | 0.99 | 0.97 | 0.94  | 0.90  | 0.86  | 0.82  | 0.77  | 0.72  | 0.67  | 0.56  | 0.45  | 0.34  | 0.23  | 0.14  | 0.00  | -0.09 |
| Malaysia                         | G1105     | 1              | 0.92 | 0.75 | 0.60 | 0.48  | 0.40  | 0.34  | 0.29  | 0.26  | 0.22  | 0.20  | 0.18  | 0.15  | 0.15  | 0.16  | 0.14  | 0.12  | 0.09  |
| Malaysia                         | G1107     | 1              | 0.92 | 0.76 | 0.64 | 0.55  | 0.49  | 0.44  | 0.41  | 0.39  | 0.36  | 0.34  | 0.32  | 0.30  | 0.27  | 0.26  | 0.23  | 0.19  | 0.18  |
| Malaysia                         | G1119     | 1              | 0.97 | 0.90 | 0.81 | 0.71  | 0.60  | 0.50  | 0.43  | 0.36  | 0.31  | 0.27  | 0.22  | 0.20  | 0.17  | 0.16  | 0.16  | 0.14  | 0.11  |
| Malaysia                         | G1125     | 1              | 0.90 | 0.72 | 0.59 | 0.50  | 0.44  | 0.42  | 0.39  | 0.36  | 0.34  | 0.32  | 0.28  | 0.24  | 0.20  | 0.16  | 0.14  | 0.09  | 0.08  |
| Malaysia                         | G1126     | 1              | 0.95 | 0.82 | 0.68 | 0.57  | 0.50  | 0.46  | 0.43  | 0.40  | 0.37  | 0.35  | 0.31  | 0.27  | 0.22  | 0.18  | 0.16  | 0.09  | 0.08  |
| Mongolia                         | G3517     | 1              | 0.96 | 0.82 | 0.63 | 0.48  | 0.36  | 0.28  | 0.23  | 0.19  | 0.16  | 0.14  | 0.10  | 0.06  | 0.04  | 0.06  | 0.10  | 0.12  | 0.08  |
| Mongolia                         | G3531     | 1              | 0.98 | 0.91 | 0.82 | 0.70  | 0.51  | 0.39  | 0.35  | 0.33  | 0.33  | 0.33  | 0.35  | 0.34  | 0.33  | 0.33  | 0.34  | 0.34  | 0.31  |
| Mongolia                         | G3532     | 1              | 1.00 | 0.99 | 0.98 | 0.97  | 0.95  | 0.90  | 0.85  | 0.79  | 0.73  | 0.66  | 0.55  | 0.46  | 0.38  | 0.32  | 0.27  | 0.22  | 0.25  |
| Mongolia                         | G3540     | 1              | 1.00 | 0.99 | 0.98 | 0.95  | 0.92  | 0.88  | 0.84  | 0.79  | 0.75  | 0.71  | 0.63  | 0.57  | 0.52  | 0.48  | 0.45  | 0.40  | 0.38  |
| Mongolia                         | G3551     | 1              | 1.00 | 0.99 | 0.98 | 0.96  | 0.94  | 0.91  | 0.88  | 0.85  | 0.81  | 0.77  | 0.70  | 0.63  | 0.57  | 0.52  | 0.47  | 0.40  | 0.37  |
| Mongolia                         | G3552     | 1              | 1.00 | 0.98 | 0.94 | 0.88  | 0.79  | 0.70  | 0.61  | 0.55  | 0.49  | 0.44  | 0.36  | 0.31  | 0.28  | 0.26  | 0.25  | 0.24  | 0.24  |
| Mongolia                         | G3573     | 1              | 1.00 | 1.00 | 0.99 | 0.98  | 0.97  | 0.95  | 0.92  | 0.89  | 0.86  | 0.83  | 0.75  | 0.68  | 0.62  | 0.56  | 0.52  | 0.43  | 0.39  |
| Mongolia                         | G3574     | 1              | 1.00 | 0.97 | 0.91 | 0.84  | 0.74  | 0.65  | 0.57  | 0.50  | 0.43  | 0.36  | 0.29  | 0.25  | 0.23  | 0.21  | 0.21  | 0.27  | 0.29  |
| Mongolia                         | G3576     | 1              | 1.00 | 0.98 | 0.93 | 0.84  | 0.74  | 0.63  | 0.52  | 0.42  | 0.35  | 0.29  | 0.21  | 0.15  | 0.09  | 0.05  | 0.04  | 0.08  | 0.11  |
| Mongolia                         | G3581     | 1              | 1.00 | 0.99 | 0.96 | 0.93  | 0.87  | 0.80  | 0.74  | 0.69  | 0.65  | 0.60  | 0.55  | 0.50  | 0.45  | 0.42  | 0.39  | 0.39  | 0.37  |
| Mongolia                         | G3582     | 1              | 0.99 | 0.98 | 0.94 | 0.90  | 0.84  | 0.78  | 0.72  | 0.67  | 0.63  | 0.59  | 0.54  | 0.50  | 0.45  | 0.42  | 0.42  | 0.43  | 0.43  |
| Mongolia                         | G3583     | 1              | 1.00 | 0.99 | 0.97 | 0.94  | 0.90  | 0.85  | 0.79  | 0.74  | 0.69  | 0.65  | 0.57  | 0.53  | 0.49  | 0.45  | 0.42  | 0.42  | 0.44  |
| Mongolia                         | G3592     | 1              | 0.99 | 0.96 | 0.87 | 0.72  | 0.57  | 0.46  | 0.37  | 0.30  | 0.26  | 0.22  | 0.15  | 0.10  | 0.06  | 0.05  | 0.06  | 0.10  | 0.14  |
| Mongolia                         | G3593     | 1              | 0.99 | 0.95 | 0.90 | 0.87  | 0.81  | 0.74  | 0.69  | 0.66  | 0.61  | 0.56  | 0.52  | 0.48  | 0.47  | 0.46  | 0.45  | 0.48  | 0.48  |
| Mongolia                         | G3602     | 1              | 0.99 | 0.97 | 0.91 | 0.84  | 0.77  | 0.72  | 0.67  | 0.62  | 0.58  | 0.55  | 0.51  | 0.47  | 0.44  | 0.43  | 0.44  | 0.45  | 0.45  |

| Country  | GloFAS ID | Station filter | LT1  | LT2  | LT3  | LT4  | LT5  | LT6  | LT7  | LT8  | LT9  | LT10 | LT12 | LT14  | LT16  | LT18  | LT20  | LT25  | L30   |
|----------|-----------|----------------|------|------|------|------|------|------|------|------|------|------|------|-------|-------|-------|-------|-------|-------|
| Mongolia | G3603     | 1              | 0.92 | 0.82 | 0.73 | 0.67 | 0.63 | 0.60 | 0.58 | 0.56 | 0.54 | 0.52 | 0.51 | 0.50  | 0.49  | 0.49  | 0.47  | 0.44  | 0.41  |
| Mongolia | G3612     | 1              | 1.00 | 0.98 | 0.92 | 0.84 | 0.75 | 0.67 | 0.61 | 0.55 | 0.52 | 0.49 | 0.44 | 0.40  | 0.37  | 0.36  | 0.35  | 0.36  | 0.39  |
| Mongolia | G3613     | 1              | 0.99 | 0.96 | 0.89 | 0.81 | 0.74 | 0.68 | 0.63 | 0.59 | 0.55 | 0.52 | 0.51 | 0.47  | 0.46  | 0.46  | 0.47  | 0.46  | 0.45  |
| Mongolia | G3619     | 1              | 0.92 | 0.80 | 0.71 | 0.62 | 0.57 | 0.55 | 0.52 | 0.52 | 0.51 | 0.50 | 0.47 | 0.46  | 0.47  | 0.46  | 0.45  | 0.46  | 0.45  |
| Mongolia | G3624     | 1              | 1.00 | 0.98 | 0.97 | 0.95 | 0.91 | 0.87 | 0.83 | 0.79 | 0.73 | 0.68 | 0.59 | 0.52  | 0.47  | 0.44  | 0.40  | 0.38  | 0.39  |
| Mongolia | G3625     | 1              | 1.00 | 0.99 | 0.98 | 0.97 | 0.96 | 0.95 | 0.93 | 0.92 | 0.90 | 0.88 | 0.84 | 0.78  | 0.72  | 0.65  | 0.60  | 0.48  | 0.39  |
| Mongolia | G3652     | 1              | 0.99 | 0.97 | 0.92 | 0.86 | 0.82 | 0.78 | 0.74 | 0.71 | 0.67 | 0.63 | 0.56 | 0.48  | 0.42  | 0.35  | 0.30  | 0.19  | 0.14  |
| Mongolia | G3653     | 1              | 1.00 | 0.99 | 0.99 | 0.99 | 0.98 | 0.98 | 0.98 | 0.97 | 0.97 | 0.96 | 0.95 | 0.94  | 0.94  | 0.93  | 0.93  | 0.88  | 0.68  |
| Mongolia | G3662     | 1              | 1.00 | 0.98 | 0.96 | 0.91 | 0.84 | 0.78 | 0.73 | 0.69 | 0.66 | 0.63 | 0.56 | 0.51  | 0.48  | 0.45  | 0.41  | 0.39  | 0.36  |
| Mongolia | G3668     | 1              | 1.00 | 0.99 | 0.98 | 0.98 | 0.97 | 0.96 | 0.95 | 0.93 | 0.91 | 0.89 | 0.84 | 0.78  | 0.71  | 0.65  | 0.58  | 0.46  | 0.35  |
| Mongolia | G3680     | 1              | 1.00 | 0.96 | 0.88 | 0.79 | 0.71 | 0.63 | 0.57 | 0.52 | 0.46 | 0.43 | 0.40 | 0.37  | 0.34  | 0.36  | 0.36  | 0.39  | 0.38  |
| Mongolia | G3686     | 1              | 1.00 | 0.96 | 0.88 | 0.80 | 0.73 | 0.66 | 0.60 | 0.56 | 0.53 | 0.50 | 0.46 | 0.43  | 0.42  | 0.41  | 0.43  | 0.43  | 0.44  |
| Mongolia | G3691     | 1              | 1.00 | 0.99 | 0.99 | 0.97 | 0.95 | 0.93 | 0.90 | 0.87 | 0.84 | 0.82 | 0.77 | 0.73  | 0.69  | 0.66  | 0.62  | 0.56  | 0.48  |
| Mongolia | G3692     | 1              | 1.00 | 1.00 | 1.00 | 1.00 | 0.99 | 0.99 | 0.98 | 0.97 | 0.96 | 0.94 | 0.92 | 0.90  | 0.86  | 0.83  | 0.79  | 0.68  | 0.55  |
| Mongolia | G3700     | 1              | 0.99 | 0.92 | 0.77 | 0.64 | 0.53 | 0.43 | 0.37 | 0.31 | 0.28 | 0.26 | 0.22 | 0.20  | 0.19  | 0.17  | 0.16  | 0.17  | 0.20  |
| Mongolia | G3704     | 1              | 1.00 | 0.97 | 0.88 | 0.77 | 0.66 | 0.55 | 0.44 | 0.34 | 0.25 | 0.17 | 0.04 | -0.04 | -0.10 | -0.16 | -0.19 | -0.23 | -0.21 |
| Mongolia | G3706     | 1              | 1.00 | 1.00 | 0.99 | 0.98 | 0.97 | 0.95 | 0.92 | 0.89 | 0.86 | 0.83 | 0.76 | 0.70  | 0.66  | 0.66  | 0.64  | 0.60  | 0.58  |
| Mongolia | G3707     | 1              | 1.00 | 1.00 | 1.00 | 1.00 | 0.99 | 0.98 | 0.98 | 0.98 | 0.97 | 0.96 | 0.95 | 0.94  | 0.91  | 0.88  | 0.83  | 0.70  | 0.55  |
| Mongolia | G3710     | 1              | 1.00 | 1.00 | 0.99 | 0.98 | 0.97 | 0.95 | 0.92 | 0.88 | 0.86 | 0.84 | 0.78 | 0.72  | 0.67  | 0.65  | 0.61  | 0.54  | 0.48  |
| Mongolia | G3784     | 1              | 1.00 | 0.99 | 0.99 | 0.99 | 0.99 | 0.98 | 0.98 | 0.98 | 0.97 | 0.96 | 0.93 | 0.89  | 0.85  | 0.81  | 0.77  | 0.69  | 0.63  |
| Mongolia | G3791     | 1              | 0.98 | 0.90 | 0.77 | 0.62 | 0.49 | 0.38 | 0.29 | 0.21 | 0.15 | 0.10 | 0.01 | -0.05 | -0.10 | -0.14 | -0.17 | -0.22 | -0.24 |
| Mongolia | G3842     | 1              | 1.00 | 0.97 | 0.93 | 0.86 | 0.80 | 0.73 | 0.66 | 0.61 | 0.56 | 0.52 | 0.44 | 0.38  | 0.33  | 0.29  | 0.27  | 0.24  | 0.22  |
| Mongolia | G3843     | 1              | 0.96 | 0.82 | 0.71 | 0.62 | 0.52 | 0.44 | 0.39 | 0.34 | 0.29 | 0.25 | 0.18 | 0.14  | 0.10  | 0.07  | 0.04  | 0.06  | 0.06  |
| Mongolia | G3865     | 1              | 0.99 | 0.99 | 0.98 | 0.97 | 0.94 | 0.90 | 0.83 | 0.77 | 0.74 | 0.70 | 0.58 | 0.54  | 0.54  | 0.52  | 0.44  | 0.49  | 0.58  |
| Mongolia | G3895     | 1              | 1.00 | 0.99 | 0.98 | 0.94 | 0.89 | 0.86 | 0.85 | 0.83 | 0.77 | 0.71 | 0.63 | 0.59  | 0.53  | 0.49  | 0.43  | 0.27  | 0.13  |
| Mongolia | G3896     | 1              | 1.00 | 1.00 | 0.99 | 0.99 | 0.98 | 0.96 | 0.94 | 0.92 | 0.89 | 0.87 | 0.82 | 0.77  | 0.73  | 0.69  | 0.64  | 0.55  | 0.42  |
| Myanmar  | G0924     | 1              | 0.95 | 0.85 | 0.75 | 0.68 | 0.60 | 0.54 | 0.50 | 0.45 | 0.41 | 0.39 | 0.32 | 0.24  | 0.21  | 0.18  | 0.15  | 0.09  | 0.02  |
| Myanmar  | G0934     | 1              | 1.00 | 0.99 | 0.97 | 0.93 | 0.88 | 0.82 | 0.77 | 0.71 | 0.65 | 0.61 | 0.53 | 0.45  | 0.36  | 0.29  | 0.24  | 0.15  | 0.08  |
| Myanmar  | G0942     | 1              | 0.93 | 0.81 | 0.70 | 0.62 | 0.55 | 0.48 | 0.43 | 0.39 | 0.35 | 0.32 | 0.26 | 0.20  | 0.14  | 0.09  | 0.03  | -0.02 | -0.08 |
| Myanmar  | G1712     | 1              | 0.99 | 0.97 | 0.93 | 0.89 | 0.83 | 0.75 | 0.66 | 0.59 | 0.53 | 0.48 | 0.41 | 0.34  | 0.29  | 0.23  | 0.19  | 0.08  | -0.01 |
| Myanmar  | G1713     | 1              | 0.98 | 0.93 | 0.85 | 0.76 | 0.69 | 0.62 | 0.56 | 0.52 | 0.47 | 0.43 | 0.37 | 0.30  | 0.24  | 0.20  | 0.16  | 0.08  | 0.04  |
| Myanmar  | G1714     | 1              | 0.90 | 0.75 | 0.64 | 0.56 | 0.48 | 0.42 | 0.37 | 0.34 | 0.29 | 0.28 | 0.21 | 0.15  | 0.10  | 0.07  | 0.05  | 0.03  | 0.02  |
| Myanmar  | G1715     | 1              | 0.99 | 0.96 | 0.89 | 0.82 | 0.76 | 0.68 | 0.61 | 0.57 | 0.54 | 0.49 | 0.40 | 0.31  | 0.24  | 0.20  | 0.17  | 0.10  | 0.04  |
| Myanmar  | G1716     | 1              | 1.00 | 0.98 | 0.95 | 0.89 | 0.83 | 0.78 | 0.71 | 0.65 | 0.61 | 0.57 | 0.49 | 0.41  | 0.32  | 0.26  | 0.21  | 0.13  | 0.07  |
| Myanmar  | G1717     | 1              | 1.00 | 0.99 | 0.97 | 0.94 | 0.91 | 0.86 | 0.81 | 0.76 | 0.71 | 0.66 | 0.58 | 0.51  | 0.45  | 0.38  | 0.31  | 0.18  | 0.08  |
| Myanmar  | G1718     | 1              | 1.00 | 0.99 | 0.99 | 0.98 | 0.96 | 0.94 | 0.91 | 0.87 | 0.82 | 0.78 | 0.68 | 0.60  | 0.54  | 0.47  | 0.41  | 0.25  | 0.13  |
| Myanmar  | G1743     | 1              | 1.00 | 0.98 | 0.93 | 0.85 | 0.77 | 0.70 | 0.63 | 0.57 | 0.52 | 0.48 | 0.41 | 0.34  | 0.27  | 0.22  | 0.18  | 0.09  | 0.04  |
| Myanmar  | G4543     | 1              | 0.90 | 0.75 | 0.65 | 0.56 | 0.49 | 0.45 | 0.41 | 0.37 | 0.33 | 0.30 | 0.24 | 0.19  | 0.16  | 0.13  | 0.10  | 0.00  | -0.08 |
| Myanmar  | G4544     | 1              | 0.95 | 0.84 | 0.72 | 0.60 | 0.52 | 0.49 | 0.46 | 0.42 | 0.36 | 0.32 | 0.23 | 0.16  | 0.14  | 0.10  | 0.07  | 0.04  | -0.01 |

| Country | GloFAS ID | Station filter | LT1  | LT2  | LT3   | LT4   | LT5   | LT6   | LT7   | LT8   | LT9   | LT10  | LT12  | LT14  | LT16  | LT18  | LT20  | LT25  | L30   |
|---------|-----------|----------------|------|------|-------|-------|-------|-------|-------|-------|-------|-------|-------|-------|-------|-------|-------|-------|-------|
| Myanmar | G4595     | 1              | 1.00 | 0.98 | 0.93  | 0.87  | 0.81  | 0.75  | 0.68  | 0.62  | 0.58  | 0.54  | 0.45  | 0.37  | 0.28  | 0.23  | 0.19  | 0.12  | 0.05  |
| Myanmar | G4620     | 1              | 0.99 | 0.98 | 0.95  | 0.90  | 0.83  | 0.75  | 0.67  | 0.61  | 0.55  | 0.51  | 0.43  | 0.37  | 0.30  | 0.25  | 0.21  | 0.11  | 0.03  |
| Myanmar | G4624     | 1              | 0.94 | 0.81 | 0.68  | 0.59  | 0.49  | 0.39  | 0.34  | 0.30  | 0.26  | 0.22  | 0.18  | 0.10  | 0.06  | 0.03  | 0.00  | -0.02 | -0.06 |
| Myanmar | G4645     | 1              | 1.00 | 0.99 | 0.97  | 0.94  | 0.90  | 0.85  | 0.81  | 0.77  | 0.73  | 0.69  | 0.63  | 0.57  | 0.51  | 0.46  | 0.41  | 0.32  | 0.24  |
| Myanmar | G4649     | 1              | 1.00 | 0.98 | 0.96  | 0.92  | 0.87  | 0.82  | 0.77  | 0.71  | 0.66  | 0.61  | 0.54  | 0.46  | 0.38  | 0.31  | 0.25  | 0.14  | 0.07  |
| Myanmar | G4650     | 1              | 1.00 | 0.99 | 0.98  | 0.95  | 0.90  | 0.85  | 0.80  | 0.74  | 0.68  | 0.64  | 0.56  | 0.48  | 0.40  | 0.31  | 0.25  | 0.16  | 0.09  |
| Myanmar | G4654     | 1              | 0.99 | 0.94 | 0.86  | 0.75  | 0.64  | 0.54  | 0.45  | 0.38  | 0.32  | 0.27  | 0.17  | 0.09  | 0.03  | 0.01  | 0.02  | -0.02 | -0.10 |
| Myanmar | G4659     | 1              | 0.93 | 0.74 | 0.57  | 0.43  | 0.33  | 0.24  | 0.17  | 0.12  | 0.07  | 0.03  | -0.06 | -0.13 | -0.17 | -0.16 | -0.16 | -0.18 | -0.22 |
| Myanmar | G4665     | 1              | 1.00 | 0.98 | 0.94  | 0.90  | 0.84  | 0.77  | 0.68  | 0.61  | 0.55  | 0.49  | 0.41  | 0.35  | 0.30  | 0.24  | 0.19  | 0.09  | 0.00  |
| Myanmar | G4668     | 1              | 1.00 | 0.99 | 0.97  | 0.94  | 0.89  | 0.84  | 0.79  | 0.74  | 0.68  | 0.63  | 0.56  | 0.49  | 0.41  | 0.33  | 0.27  | 0.16  | 0.08  |
| Myanmar | G4672     | 1              | 0.94 | 0.81 | 0.67  | 0.55  | 0.46  | 0.39  | 0.33  | 0.28  | 0.23  | 0.18  | 0.10  | 0.05  | 0.01  | 0.01  | 0.01  | -0.02 | -0.05 |
| Myanmar | G4673     | 1              | 0.98 | 0.93 | 0.87  | 0.80  | 0.74  | 0.69  | 0.64  | 0.59  | 0.55  | 0.51  | 0.41  | 0.34  | 0.27  | 0.22  | 0.17  | 0.11  | 0.06  |
| Myanmar | G4686     | 1              | 0.98 | 0.93 | 0.87  | 0.80  | 0.73  | 0.67  | 0.61  | 0.55  | 0.50  | 0.45  | 0.36  | 0.27  | 0.20  | 0.14  | 0.08  | -0.04 | -0.13 |
| Myanmar | G4689     | 1              | 0.98 | 0.95 | 0.90  | 0.85  | 0.79  | 0.74  | 0.70  | 0.66  | 0.62  | 0.59  | 0.49  | 0.42  | 0.33  | 0.26  | 0.20  | 0.10  | 0.05  |
| Myanmar | G4713     | 1              | 0.99 | 0.96 | 0.92  | 0.87  | 0.81  | 0.75  | 0.70  | 0.65  | 0.61  | 0.57  | 0.48  | 0.38  | 0.31  | 0.23  | 0.17  | 0.06  | -0.01 |
| Myanmar | G4745     | 1              | 0.94 | 0.85 | 0.76  | 0.68  | 0.60  | 0.53  | 0.46  | 0.40  | 0.34  | 0.29  | 0.20  | 0.11  | 0.04  | 0.02  | -0.02 | -0.10 | -0.14 |
| Myanmar | G4751     | 1              | 0.99 | 0.96 | 0.92  | 0.87  | 0.82  | 0.75  | 0.70  | 0.64  | 0.60  | 0.55  | 0.46  | 0.35  | 0.27  | 0.20  | 0.14  | 0.02  | -0.05 |
| Myanmar | G4802     | 1              | 0.95 | 0.85 | 0.76  | 0.69  | 0.63  | 0.57  | 0.51  | 0.45  | 0.40  | 0.35  | 0.27  | 0.20  | 0.14  | 0.09  | 0.06  | 0.02  | -0.03 |
| Nepal   | G0915     | 1              | 0.91 | 0.75 | 0.61  | 0.49  | 0.39  | 0.31  | 0.25  | 0.21  | 0.19  | 0.15  | 0.10  | 0.07  | 0.05  | 0.04  | 0.07  | 0.06  | 0.02  |
| Nepal   | G3955     | 1              | 0.45 | 0.14 | -0.04 | -0.17 | -0.24 | -0.27 | -0.29 | -0.31 | -0.33 | -0.35 | -0.38 | -0.39 | -0.42 | -0.44 | -0.47 | -0.51 | -0.58 |
| Nepal   | G3980     | 1              | 0.71 | 0.44 | 0.29  | 0.19  | 0.11  | 0.07  | 0.03  | -0.01 | -0.05 | -0.06 | -0.11 | -0.12 | -0.04 | 0.05  | 0.04  | 0.02  | -0.03 |
| Nepal   | G4012     | 1              | 0.56 | 0.34 | 0.24  | 0.15  | 0.09  | 0.08  | 0.07  | 0.05  | 0.01  | 0.03  | 0.02  | -0.03 | -0.04 | -0.05 | -0.08 | -0.20 | -0.29 |
| Nepal   | G4073     | 1              | 0.61 | 0.38 | 0.23  | 0.11  | 0.07  | 0.04  | 0.02  | 0.00  | -0.04 | -0.08 | -0.11 | -0.12 | -0.21 | -0.27 | -0.31 | -0.42 | -0.52 |
| Nepal   | G4159     | 1              | 0.61 | 0.32 | 0.15  | 0.07  | 0.00  | -0.04 | -0.06 | -0.10 | -0.12 | -0.13 | -0.17 | -0.18 | -0.19 | -0.14 | -0.17 | -0.22 | -0.27 |
| Nepal   | G4367     | 1              | 0.64 | 0.15 | -0.20 | -0.42 | -0.56 | -0.63 | -0.70 | -0.74 | -0.77 | -0.80 | -0.82 | -0.87 | -0.93 | -0.93 | -0.85 | -0.82 | -0.86 |
| Nepal   | G4385     | 1              | 0.91 | 0.74 | 0.56  | 0.43  | 0.32  | 0.23  | 0.18  | 0.15  | 0.13  | 0.10  | 0.04  | 0.03  | 0.02  | 0.03  | 0.06  | 0.02  | -0.03 |
| Nepal   | G4393     | 1              | 0.86 | 0.66 | 0.52  | 0.42  | 0.35  | 0.27  | 0.23  | 0.20  | 0.16  | 0.14  | 0.10  | 0.06  | 0.05  | 0.05  | 0.08  | 0.07  | 0.06  |
| Nepal   | G4399     | 1              | 0.71 | 0.54 | 0.46  | 0.37  | 0.34  | 0.31  | 0.30  | 0.24  | 0.25  | 0.23  | 0.20  | 0.18  | 0.15  | 0.13  | 0.13  | 0.11  | 0.09  |
| Nepal   | G4403     | 1              | 0.85 | 0.62 | 0.45  | 0.32  | 0.23  | 0.18  | 0.16  | 0.15  | 0.12  | 0.09  | 0.07  | 0.03  | 0.00  | 0.00  | -0.04 | -0.09 | -0.18 |
| Nepal   | G4416     | 1              | 0.76 | 0.58 | 0.45  | 0.41  | 0.36  | 0.28  | 0.28  | 0.26  | 0.22  | 0.21  | 0.21  | 0.19  | 0.17  | 0.18  | 0.17  | 0.17  | 0.15  |
| Nepal   | G4425     | 1              | 0.67 | 0.45 | 0.34  | 0.28  | 0.21  | 0.20  | 0.19  | 0.17  | 0.13  | 0.13  | 0.13  | 0.08  | 0.09  | 0.07  | 0.06  | -0.01 | -0.07 |
| Nepal   | G4449     | 1              | 0.76 | 0.53 | 0.38  | 0.24  | 0.13  | 0.09  | 0.07  | 0.03  | 0.01  | 0.01  | -0.06 | -0.08 | -0.10 | -0.10 | -0.11 | -0.15 | -0.21 |
| Nepal   | G4456     | 1              | 0.87 | 0.70 | 0.58  | 0.52  | 0.44  | 0.39  | 0.37  | 0.34  | 0.30  | 0.29  | 0.27  | 0.24  | 0.21  | 0.21  | 0.20  | 0.20  | 0.16  |
| Nepal   | G4469     | 1              | 0.78 | 0.60 | 0.46  | 0.39  | 0.32  | 0.28  | 0.26  | 0.22  | 0.20  | 0.17  | 0.14  | 0.12  | 0.13  | 0.12  | 0.12  | 0.10  | 0.06  |
| Nepal   | G4475     | 1              | 0.83 | 0.57 | 0.34  | 0.17  | 0.03  | -0.03 | -0.07 | -0.09 | -0.13 | -0.15 | -0.17 | -0.22 | -0.24 | -0.25 | -0.25 | -0.29 | -0.38 |
| Nepal   | G4482     | 1              | 0.65 | 0.46 | 0.37  | 0.28  | 0.23  | 0.23  | 0.22  | 0.16  | 0.15  | 0.15  | 0.12  | 0.13  | 0.13  | 0.13  | 0.15  | 0.13  | 0.11  |
| Nepal   | G4502     | 1              | 0.46 | 0.06 | -0.18 | -0.32 | -0.41 | -0.48 | -0.51 | -0.54 | -0.57 | -0.58 | -0.59 | -0.61 | -0.48 | -0.33 | -0.29 | -0.31 | -0.34 |
| Nepal   | G4510     | 1              | 0.72 | 0.47 | 0.31  | 0.19  | 0.12  | 0.08  | 0.08  | 0.06  | 0.04  | -0.01 | -0.03 | -0.04 | -0.09 | -0.12 | -0.16 | -0.22 | -0.31 |
| Nepal   | G4514     | 1              | 0.56 | 0.33 | 0.25  | 0.17  | 0.14  | 0.13  | 0.11  | 0.09  | 0.07  | 0.06  | 0.04  | 0.02  | 0.03  | 0.02  | 0.00  | -0.08 | -0.13 |

| Country  | GloFAS ID | Station filter | LT1  | LT2  | LT3  | LT4   | LT5   | LT6   | LT7   | LT8   | LT9   | LT10  | LT12  | LT14  | LT16  | LT18  | LT20  | LT25  | L30   |
|----------|-----------|----------------|------|------|------|-------|-------|-------|-------|-------|-------|-------|-------|-------|-------|-------|-------|-------|-------|
| Nepal    | G4541     | 1              | 0.74 | 0.54 | 0.44 | 0.38  | 0.28  | 0.26  | 0.22  | 0.18  | 0.16  | 0.16  | 0.11  | 0.09  | 0.06  | 0.07  | 0.04  | 0.03  | -0.02 |
| Nepal    | G4550     | 0              | 0.46 | 0.24 | 0.12 | 0.03  | -0.03 | -0.03 | -0.04 | -0.09 | -0.10 | -0.11 | -0.16 | -0.16 | -0.22 | -0.30 | -0.34 | -0.41 | -0.48 |
| Nepal    | G4569     | 1              | 0.70 | 0.52 | 0.46 | 0.42  | 0.33  | 0.32  | 0.31  | 0.29  | 0.24  | 0.23  | 0.22  | 0.16  | 0.12  | 0.07  | 0.08  | 0.05  | 0.07  |
| Nepal    | G4578     | 1              | 0.57 | 0.31 | 0.13 | 0.00  | -0.08 | -0.14 | -0.19 | -0.22 | -0.25 | -0.28 | -0.31 | -0.37 | -0.29 | -0.25 | -0.24 | -0.26 | -0.29 |
| Nepal    | G4619     | 1              | 0.79 | 0.45 | 0.11 | -0.13 | -0.29 | -0.37 | -0.43 | -0.48 | -0.52 | -0.55 | -0.57 | -0.62 | -0.64 | -0.68 | -0.64 | -0.64 | -0.68 |
| Nepal    | G4674     | 0              | 0.65 | 0.48 | 0.40 | 0.34  | 0.27  | 0.24  | 0.22  | 0.16  | 0.17  | 0.17  | 0.12  | 0.12  | 0.08  | 0.05  | 0.06  | 0.08  | 0.09  |
| Oman     | G0932     | 1              | 0.99 | 0.91 | 0.93 | 0.94  | 0.93  | 0.88  | 0.90  | 0.92  | 0.86  | 0.86  | 0.87  | 0.83  | 0.80  | 0.86  | 0.84  | 0.87  | 0.81  |
| Oman     | G4657     | 1              | 1.00 | 1.00 | 1.00 | 0.97  | 0.90  | 0.90  | 0.86  | 0.79  | 0.79  | 0.78  | 0.71  | 0.68  | 0.64  | 0.71  | 0.70  | 0.68  | 0.64  |
| Oman     | G4661     | 1              | 1.00 | 1.00 | 1.00 | 0.95  | 0.85  | 0.87  | 0.86  | 0.77  | 0.79  | 0.82  | 0.73  | 0.75  | 0.71  | 0.75  | 0.70  | 0.69  | 0.67  |
| Oman     | G4737     | 1              | 1.00 | 1.00 | 0.98 | 0.90  | 0.78  | 0.81  | 0.74  | 0.65  | 0.73  | 0.77  | 0.64  | 0.67  | 0.63  | 0.58  | 0.56  | 0.50  | 0.47  |
| Oman     | G4738     | 1              | 1.00 | 0.99 | 0.99 | 0.95  | 0.70  | 0.73  | 0.77  | 0.56  | 0.58  | 0.67  | 0.53  | 0.66  | 0.55  | 0.67  | 0.52  | 0.62  | 0.50  |
| Pakistan | G1728     | 1              | 1.00 | 0.99 | 0.95 | 0.89  | 0.83  | 0.76  | 0.67  | 0.60  | 0.55  | 0.50  | 0.41  | 0.35  | 0.30  | 0.26  | 0.23  | 0.16  | 0.13  |
| Pakistan | G1794     | 1              | 1.00 | 0.99 | 0.97 | 0.93  | 0.88  | 0.81  | 0.75  | 0.67  | 0.61  | 0.56  | 0.46  | 0.39  | 0.33  | 0.28  | 0.25  | 0.17  | 0.14  |
| Pakistan | G1795     | 1              | 1.00 | 0.99 | 0.98 | 0.96  | 0.94  | 0.92  | 0.90  | 0.88  | 0.85  | 0.82  | 0.78  | 0.73  | 0.67  | 0.61  | 0.57  | 0.43  | 0.33  |
| Pakistan | G1796     | 1              | 1.00 | 0.98 | 0.92 | 0.85  | 0.77  | 0.69  | 0.60  | 0.55  | 0.50  | 0.46  | 0.38  | 0.32  | 0.27  | 0.24  | 0.22  | 0.15  | 0.13  |
| Pakistan | G1797     | 1              | 1.00 | 0.99 | 0.97 | 0.93  | 0.87  | 0.79  | 0.72  | 0.66  | 0.61  | 0.56  | 0.46  | 0.37  | 0.30  | 0.25  | 0.23  | 0.17  | 0.14  |
| Pakistan | G1798     | 1              | 1.00 | 0.99 | 0.97 | 0.95  | 0.92  | 0.87  | 0.81  | 0.74  | 0.68  | 0.63  | 0.52  | 0.42  | 0.33  | 0.24  | 0.16  | -0.04 | -0.17 |
| Pakistan | G1799     | 1              | 1.00 | 0.99 | 0.98 | 0.95  | 0.90  | 0.84  | 0.77  | 0.70  | 0.64  | 0.59  | 0.48  | 0.38  | 0.29  | 0.20  | 0.13  | -0.08 | -0.18 |
| Pakistan | G1800     | 1              | 1.00 | 0.99 | 0.96 | 0.93  | 0.87  | 0.79  | 0.71  | 0.65  | 0.59  | 0.54  | 0.44  | 0.34  | 0.25  | 0.17  | 0.09  | -0.10 | -0.19 |
| Pakistan | G1801     | 1              | 1.00 | 0.98 | 0.92 | 0.85  | 0.80  | 0.76  | 0.73  | 0.69  | 0.64  | 0.59  | 0.51  | 0.42  | 0.36  | 0.29  | 0.21  | 0.00  | -0.10 |
| Pakistan | G1923     | 1              | 1.00 | 1.00 | 1.00 | 0.99  | 0.99  | 0.98  | 0.96  | 0.93  | 0.90  | 0.85  | 0.77  | 0.71  | 0.62  | 0.55  | 0.48  | 0.31  | 0.13  |
| Pakistan | G1924     | 1              | 1.00 | 1.00 | 1.00 | 1.00  | 1.00  | 0.99  | 0.99  | 0.99  | 0.98  | 0.98  | 0.96  | 0.91  | 0.85  | 0.79  | 0.73  | 0.55  | 0.38  |
| Pakistan | G1925     | 1              | 1.00 | 1.00 | 1.00 | 1.00  | 1.00  | 0.99  | 0.99  | 0.99  | 0.99  | 0.99  | 0.98  | 0.96  | 0.92  | 0.88  | 0.82  | 0.67  | 0.49  |
| Pakistan | G1986     | 1              | 1.00 | 1.00 | 1.00 | 1.00  | 0.99  | 0.99  | 0.97  | 0.95  | 0.93  | 0.90  | 0.83  | 0.77  | 0.71  | 0.66  | 0.60  | 0.49  | 0.37  |
| Pakistan | G1987     | 1              | 1.00 | 1.00 | 1.00 | 1.00  | 0.99  | 0.99  | 0.99  | 0.98  | 0.97  | 0.96  | 0.90  | 0.83  | 0.76  | 0.69  | 0.62  | 0.44  | 0.27  |
| Pakistan | G4210     | 1              | 0.95 | 0.76 | 0.53 | 0.39  | 0.30  | 0.25  | 0.20  | 0.16  | 0.13  | 0.10  | 0.05  | 0.00  | -0.02 | -0.15 | -0.21 | -0.22 | -0.18 |
| Pakistan | G4215     | 1              | 0.99 | 0.94 | 0.81 | 0.64  | 0.51  | 0.44  | 0.37  | 0.33  | 0.29  | 0.26  | 0.17  | 0.08  | 0.00  | -0.09 | -0.13 | -0.17 | -0.21 |
| Pakistan | G4226     | 1              | 0.98 | 0.89 | 0.78 | 0.64  | 0.52  | 0.44  | 0.37  | 0.32  | 0.28  | 0.25  | 0.18  | 0.11  | 0.04  | -0.05 | -0.12 | -0.14 | -0.15 |
| Pakistan | G4256     | 1              | 1.00 | 0.98 | 0.95 | 0.91  | 0.83  | 0.74  | 0.68  | 0.62  | 0.56  | 0.51  | 0.41  | 0.33  | 0.24  | 0.16  | 0.07  | -0.11 | -0.19 |
| Pakistan | G4260     | 1              | 0.96 | 0.84 | 0.73 | 0.62  | 0.51  | 0.42  | 0.37  | 0.34  | 0.30  | 0.24  | 0.18  | 0.13  | 0.10  | 0.08  | 0.05  | 0.05  | 0.05  |
| Pakistan | G4283     | 1              | 0.96 | 0.90 | 0.83 | 0.73  | 0.67  | 0.63  | 0.60  | 0.58  | 0.56  | 0.53  | 0.47  | 0.43  | 0.41  | 0.42  | 0.43  | 0.42  | 0.40  |
| Pakistan | G4288     | 1              | 0.95 | 0.92 | 0.88 | 0.81  | 0.75  | 0.72  | 0.69  | 0.64  | 0.62  | 0.62  | 0.56  | 0.52  | 0.50  | 0.51  | 0.50  | 0.45  | 0.41  |
| Pakistan | G4316     | 1              | 1.00 | 1.00 | 0.99 | 0.97  | 0.96  | 0.94  | 0.92  | 0.90  | 0.88  | 0.85  | 0.80  | 0.76  | 0.71  | 0.65  | 0.60  | 0.46  | 0.36  |
| Pakistan | G4344     | 1              | 1.00 | 1.00 | 0.99 | 0.97  | 0.95  | 0.92  | 0.88  | 0.83  | 0.79  | 0.74  | 0.65  | 0.58  | 0.51  | 0.46  | 0.42  | 0.33  | 0.27  |
| Pakistan | G4350     | 1              | 1.00 | 1.00 | 1.00 | 0.99  | 0.98  | 0.94  | 0.90  | 0.86  | 0.81  | 0.74  | 0.67  | 0.57  | 0.51  | 0.43  | 0.38  | 0.32  | 0.28  |
| Pakistan | G4383     | 1              | 0.98 | 0.93 | 0.91 | 0.87  | 0.83  | 0.79  | 0.73  | 0.57  | 0.50  | 0.51  | 0.39  | 0.43  | 0.36  | 0.47  | 0.40  | 0.48  | 0.39  |
| Pakistan | G4391     | 1              | 1.00 | 1.00 | 1.00 | 1.00  | 1.00  | 0.99  | 0.99  | 0.99  | 0.98  | 0.97  | 0.93  | 0.91  | 0.89  | 0.86  | 0.83  | 0.69  | 0.52  |
| Pakistan | G4398     | 1              | 0.99 | 0.90 | 0.83 | 0.87  | 0.81  | 0.74  | 0.77  | 0.80  | 0.77  | 0.72  | 0.68  | 0.65  | 0.63  | 0.61  | 0.52  | 0.53  | 0.48  |
| Pakistan | G4402     | 1              | 1.00 | 1.00 | 0.99 | 0.98  | 0.93  | 0.89  | 0.89  | 0.87  | 0.84  | 0.79  | 0.77  | 0.68  | 0.67  | 0.61  | 0.58  | 0.46  | 0.42  |

| Country            | GloFAS ID | Station filter | LT1  | LT2  | LT3  | LT4  | LT5  | LT6  | LT7  | LT8  | LT9  | LT10 | LT12 | LT14 | LT16 | LT18 | LT20 | LT25  | L30   |
|--------------------|-----------|----------------|------|------|------|------|------|------|------|------|------|------|------|------|------|------|------|-------|-------|
| Pakistan           | G4408     | 1              | 0.92 | 0.73 | 0.83 | 0.80 | 0.62 | 0.75 | 0.84 | 0.77 | 0.56 | 0.65 | 0.50 | 0.73 | 0.51 | 0.66 | 0.61 | 0.64  | 0.51  |
| Pakistan           | G4409     | 1              | 1.00 | 1.00 | 1.00 | 1.00 | 1.00 | 1.00 | 1.00 | 0.98 | 0.95 | 0.88 | 0.83 | 0.80 | 0.78 | 0.78 | 0.79 | 0.83  | 0.83  |
| Pakistan           | G4419     | 1              | 1.00 | 1.00 | 1.00 | 0.99 | 0.99 | 0.99 | 0.97 | 0.90 | 0.85 | 0.79 | 0.64 | 0.54 | 0.47 | 0.43 | 0.40 | 0.30  | 0.24  |
| Pakistan           | G4437     | 1              | 1.00 | 0.99 | 0.99 | 0.99 | 0.96 | 0.91 | 0.88 | 0.86 | 0.81 | 0.78 | 0.76 | 0.76 | 0.72 | 0.70 | 0.61 | 0.55  | 0.45  |
| Pakistan           | G4439     | 1              | 0.96 | 0.96 | 0.97 | 0.77 | 0.71 | 0.79 | 0.84 | 0.70 | 0.67 | 0.76 | 0.55 | 0.74 | 0.51 | 0.54 | 0.59 | 0.52  | 0.47  |
| Pakistan           | G4440     | 1              | 1.00 | 0.98 | 0.98 | 0.96 | 0.74 | 0.82 | 0.86 | 0.89 | 0.72 | 0.75 | 0.60 | 0.65 | 0.53 | 0.62 | 0.48 | 0.57  | 0.46  |
| Pakistan           | G4441     | 1              | 0.99 | 0.89 | 0.84 | 0.88 | 0.84 | 0.71 | 0.68 | 0.69 | 0.63 | 0.56 | 0.64 | 0.55 | 0.56 | 0.59 | 0.52 | 0.58  | 0.53  |
| Pakistan           | G4444     | 1              | 0.98 | 0.85 | 0.70 | 0.66 | 0.66 | 0.58 | 0.48 | 0.44 | 0.50 | 0.52 | 0.59 | 0.50 | 0.52 | 0.52 | 0.51 | 0.49  | 0.46  |
| Pakistan           | G4445     | 1              | 1.00 | 0.99 | 0.94 | 0.79 | 0.68 | 0.65 | 0.61 | 0.52 | 0.49 | 0.48 | 0.41 | 0.41 | 0.37 | 0.34 | 0.33 | 0.29  | 0.27  |
| Pakistan           | G4446     | 1              | 1.00 | 1.00 | 0.99 | 0.97 | 0.94 | 0.92 | 0.88 | 0.84 | 0.82 | 0.81 | 0.80 | 0.77 | 0.74 | 0.70 | 0.67 | 0.63  | 0.62  |
| Pakistan           | G4448     | 1              | 1.00 | 1.00 | 0.98 | 0.95 | 0.90 | 0.78 | 0.40 | 0.10 | 0.13 | 0.20 | 0.22 | 0.19 | 0.20 | 0.16 | 0.20 | 0.20  | 0.16  |
| Pakistan           | G4453     | 1              | 1.00 | 0.95 | 0.85 | 0.75 | 0.69 | 0.64 | 0.56 | 0.48 | 0.48 | 0.50 | 0.48 | 0.45 | 0.43 | 0.41 | 0.41 | 0.35  | 0.33  |
| Pakistan           | G4454     | 1              | 0.99 | 0.94 | 0.84 | 0.88 | 0.87 | 0.78 | 0.67 | 0.69 | 0.66 | 0.56 | 0.63 | 0.50 | 0.57 | 0.55 | 0.54 | 0.54  | 0.53  |
| Pakistan           | G4470     | 1              | 0.98 | 0.94 | 0.95 | 0.83 | 0.77 | 0.78 | 0.83 | 0.75 | 0.67 | 0.78 | 0.62 | 0.78 | 0.58 | 0.63 | 0.63 | 0.59  | 0.53  |
| Pakistan           | G4471     | 1              | 0.97 | 0.94 | 0.88 | 0.66 | 0.76 | 0.82 | 0.80 | 0.62 | 0.74 | 0.75 | 0.55 | 0.66 | 0.51 | 0.44 | 0.57 | 0.42  | 0.47  |
| Pakistan           | G4500     | 1              | 1.00 | 1.00 | 1.00 | 1.00 | 1.00 | 1.00 | 0.99 | 0.99 | 0.99 | 0.98 | 0.95 | 0.89 | 0.83 | 0.76 | 0.69 | 0.51  | 0.34  |
| Pakistan           | G4509     | 1              | 1.00 | 0.99 | 0.97 | 0.96 | 0.94 | 0.89 | 0.83 | 0.79 | 0.76 | 0.71 | 0.61 | 0.60 | 0.61 | 0.56 | 0.54 | 0.46  | 0.41  |
| Pakistan           | G4520     | 1              | 0.98 | 0.97 | 0.90 | 0.77 | 0.83 | 0.84 | 0.76 | 0.68 | 0.77 | 0.78 | 0.57 | 0.65 | 0.55 | 0.47 | 0.64 | 0.47  | 0.55  |
| Pakistan           | G4521     | 1              | 0.99 | 0.96 | 0.69 | 0.63 | 0.74 | 0.74 | 0.72 | 0.78 | 0.81 | 0.76 | 0.75 | 0.58 | 0.72 | 0.55 | 0.52 | 0.52  | 0.66  |
| Pakistan           | G4566     | 1              | 1.00 | 0.99 | 0.94 | 0.88 | 0.86 | 0.85 | 0.80 | 0.74 | 0.71 | 0.68 | 0.63 | 0.58 | 0.58 | 0.56 | 0.57 | 0.48  | 0.48  |
| Papua New Guinea   | G1729     | 1              | 1.00 | 0.99 | 0.97 | 0.91 | 0.80 | 0.67 | 0.55 | 0.46 | 0.40 | 0.35 | 0.29 | 0.26 | 0.23 | 0.20 | 0.18 | 0.15  | 0.11  |
| Papua New Guinea   | G5416     | 1              | 0.98 | 0.89 | 0.79 | 0.68 | 0.57 | 0.47 | 0.38 | 0.31 | 0.26 | 0.21 | 0.14 | 0.10 | 0.07 | 0.03 | 0.00 | -0.03 | -0.06 |
| Papua New Guinea   | G5525     | 1              | 1.00 | 0.99 | 0.95 | 0.84 | 0.69 | 0.54 | 0.42 | 0.33 | 0.27 | 0.23 | 0.19 | 0.16 | 0.15 | 0.13 | 0.12 | 0.10  | 0.08  |
| Papua New Guinea   | G5526     | 1              | 0.99 | 0.98 | 0.91 | 0.78 | 0.64 | 0.53 | 0.46 | 0.42 | 0.39 | 0.36 | 0.32 | 0.28 | 0.25 | 0.21 | 0.19 | 0.14  | 0.11  |
| Philippines        | G1964     | 1              | 0.98 | 0.92 | 0.84 | 0.76 | 0.70 | 0.63 | 0.56 | 0.50 | 0.45 | 0.41 | 0.33 | 0.27 | 0.22 | 0.18 | 0.17 | 0.12  | 0.09  |
| Philippines        | G1965     | 1              | 0.83 | 0.68 | 0.57 | 0.48 | 0.40 | 0.35 | 0.30 | 0.26 | 0.24 | 0.22 | 0.18 | 0.18 | 0.13 | 0.11 | 0.08 | 0.03  | -0.03 |
| Philippines        | G1966     | 1              | 0.97 | 0.86 | 0.75 | 0.66 | 0.57 | 0.48 | 0.41 | 0.36 | 0.31 | 0.27 | 0.23 | 0.17 | 0.14 | 0.13 | 0.12 | 0.10  | 0.07  |
| Philippines        | G1967     | 0              | 0.66 | 0.46 | 0.37 | 0.30 | 0.27 | 0.25 | 0.22 | 0.18 | 0.16 | 0.14 | 0.11 | 0.11 | 0.17 | 0.13 | 0.09 | 0.02  | -0.01 |
| Philippines        | G1968     | 1              | 0.70 | 0.55 | 0.45 | 0.39 | 0.31 | 0.25 | 0.23 | 0.18 | 0.18 | 0.13 | 0.12 | 0.12 | 0.11 | 0.09 | 0.11 | 0.09  | 0.10  |
| Philippines        | G1969     | 1              | 0.89 | 0.71 | 0.59 | 0.51 | 0.44 | 0.40 | 0.36 | 0.33 | 0.30 | 0.27 | 0.23 | 0.19 | 0.16 | 0.12 | 0.12 | 0.10  | 0.06  |
| Philippines        | G1970     | 1              | 0.84 | 0.67 | 0.58 | 0.51 | 0.46 | 0.43 | 0.38 | 0.37 | 0.34 | 0.31 | 0.28 | 0.23 | 0.21 | 0.17 | 0.16 | 0.15  | 0.12  |
| Philippines        | G4616     | 0              | 0.70 | 0.57 | 0.48 | 0.43 | 0.39 | 0.35 | 0.30 | 0.30 | 0.25 | 0.23 | 0.21 | 0.19 | 0.19 | 0.18 | 0.17 | 0.16  | 0.14  |
| Philippines        | G4945     | 1              | 0.92 | 0.76 | 0.65 | 0.59 | 0.55 | 0.49 | 0.46 | 0.44 | 0.39 | 0.37 | 0.34 | 0.28 | 0.26 | 0.22 | 0.21 | 0.19  | 0.18  |
| Philippines        | G5368     | 1              | 0.94 | 0.82 | 0.70 | 0.62 | 0.56 | 0.52 | 0.47 | 0.44 | 0.40 | 0.37 | 0.33 | 0.28 | 0.25 | 0.22 | 0.20 | 0.17  | 0.17  |
| Philippines        | G5369     | 1              | 0.91 | 0.79 | 0.72 | 0.67 | 0.62 | 0.57 | 0.53 | 0.50 | 0.46 | 0.43 | 0.39 | 0.35 | 0.31 | 0.28 | 0.24 | 0.17  | 0.13  |
| Russian Federation | G0001     | 1              | 1.00 | 1.00 | 1.00 | 1.00 | 0.99 | 0.99 | 0.99 | 0.98 | 0.97 | 0.96 | 0.92 | 0.87 | 0.83 | 0.80 | 0.76 | 0.70  | 0.63  |
| Russian Federation | G0002     | 1              | 1.00 | 0.97 | 0.94 | 0.91 | 0.88 | 0.87 | 0.85 | 0.84 | 0.81 | 0.80 | 0.78 | 0.77 | 0.74 | 0.71 | 0.67 | 0.56  | 0.47  |
| Russian Federation | G0003     | 1              | 1.00 | 1.00 | 0.99 | 0.98 | 0.97 | 0.96 | 0.95 | 0.94 | 0.93 | 0.91 | 0.85 | 0.80 | 0.75 | 0.72 | 0.69 | 0.61  | 0.57  |
| Russian Federation | G0004     | 1              | 1.00 | 0.99 | 0.99 | 0.98 | 0.96 | 0.95 | 0.93 | 0.91 | 0.89 | 0.86 | 0.81 | 0.75 | 0.69 | 0.63 | 0.59 | 0.53  | 0.47  |

| Country            | GloFAS ID | Station filter | LT1  | LT2  | LT3  | LT4  | LT5  | LT6  | LT7  | LT8  | LT9  | LT10 | LT12 | LT14 | LT16 | LT18  | LT20  | LT25  | L30   |
|--------------------|-----------|----------------|------|------|------|------|------|------|------|------|------|------|------|------|------|-------|-------|-------|-------|
| Russian Federation | G0005     | 1              | 1.00 | 1.00 | 1.00 | 1.00 | 0.99 | 0.98 | 0.97 | 0.95 | 0.94 | 0.92 | 0.89 | 0.85 | 0.80 | 0.74  | 0.67  | 0.49  | 0.38  |
| Russian Federation | G0006     | 1              | 1.00 | 1.00 | 0.99 | 0.98 | 0.97 | 0.95 | 0.93 | 0.90 | 0.87 | 0.85 | 0.80 | 0.77 | 0.73 | 0.71  | 0.68  | 0.62  | 0.54  |
| Russian Federation | G0011     | 1              | 1.00 | 1.00 | 0.99 | 0.99 | 0.98 | 0.97 | 0.95 | 0.93 | 0.91 | 0.87 | 0.81 | 0.72 | 0.62 | 0.54  | 0.48  | 0.38  | 0.32  |
| Russian Federation | G0012     | 1              | 0.98 | 0.89 | 0.75 | 0.60 | 0.51 | 0.45 | 0.40 | 0.37 | 0.35 | 0.33 | 0.31 | 0.31 | 0.32 | 0.32  | 0.31  | 0.28  | 0.28  |
| Russian Federation | G0014     | 1              | 0.99 | 0.96 | 0.91 | 0.85 | 0.79 | 0.74 | 0.72 | 0.68 | 0.62 | 0.58 | 0.53 | 0.49 | 0.42 | 0.37  | 0.34  | 0.31  | 0.29  |
| Russian Federation | G0016     | 1              | 1.00 | 1.00 | 1.00 | 0.99 | 0.99 | 0.98 | 0.98 | 0.97 | 0.96 | 0.94 | 0.90 | 0.85 | 0.80 | 0.75  | 0.71  | 0.56  | 0.38  |
| Russian Federation | G0018     | 1              | 1.00 | 0.99 | 0.98 | 0.96 | 0.95 | 0.93 | 0.90 | 0.87 | 0.83 | 0.80 | 0.74 | 0.68 | 0.59 | 0.54  | 0.50  | 0.42  | 0.39  |
| Russian Federation | G0020     | 1              | 1.00 | 0.99 | 0.98 | 0.96 | 0.94 | 0.91 | 0.88 | 0.84 | 0.80 | 0.76 | 0.65 | 0.56 | 0.49 | 0.45  | 0.41  | 0.33  | 0.31  |
| Russian Federation | G0023     | 1              | 1.00 | 1.00 | 1.00 | 0.99 | 0.98 | 0.97 | 0.96 | 0.93 | 0.89 | 0.85 | 0.79 | 0.68 | 0.59 | 0.53  | 0.48  | 0.38  | 0.33  |
| Russian Federation | G0024     | 1              | 1.00 | 0.98 | 0.95 | 0.90 | 0.84 | 0.78 | 0.71 | 0.65 | 0.58 | 0.52 | 0.43 | 0.38 | 0.37 | 0.36  | 0.32  | 0.27  | 0.27  |
| Russian Federation | G0031     | 1              | 1.00 | 1.00 | 1.00 | 0.99 | 0.98 | 0.97 | 0.96 | 0.94 | 0.92 | 0.89 | 0.83 | 0.75 | 0.68 | 0.60  | 0.52  | 0.34  | 0.19  |
| Russian Federation | G0035     | 1              | 1.00 | 1.00 | 1.00 | 0.99 | 0.99 | 0.98 | 0.96 | 0.95 | 0.93 | 0.90 | 0.86 | 0.80 | 0.73 | 0.63  | 0.53  | 0.37  | 0.25  |
| Russian Federation | G0040     | 1              | 1.00 | 0.99 | 0.98 | 0.96 | 0.94 | 0.91 | 0.89 | 0.86 | 0.82 | 0.78 | 0.67 | 0.57 | 0.46 | 0.37  | 0.29  | 0.11  | 0.00  |
| Russian Federation | G0046     | 1              | 1.00 | 1.00 | 1.00 | 0.99 | 0.99 | 0.98 | 0.97 | 0.95 | 0.92 | 0.89 | 0.83 | 0.76 | 0.69 | 0.63  | 0.57  | 0.43  | 0.30  |
| Russian Federation | G0047     | 1              | 1.00 | 1.00 | 0.99 | 0.99 | 0.98 | 0.97 | 0.96 | 0.95 | 0.93 | 0.92 | 0.88 | 0.84 | 0.79 | 0.74  | 0.67  | 0.49  | 0.28  |
| Russian Federation | G0058     | 1              | 1.00 | 0.99 | 0.97 | 0.95 | 0.92 | 0.88 | 0.84 | 0.80 | 0.75 | 0.71 | 0.65 | 0.61 | 0.58 | 0.54  | 0.49  | 0.36  | 0.25  |
| Russian Federation | G0059     | 1              | 1.00 | 0.99 | 0.98 | 0.95 | 0.91 | 0.84 | 0.77 | 0.70 | 0.63 | 0.56 | 0.46 | 0.38 | 0.35 | 0.33  | 0.32  | 0.30  | 0.27  |
| Russian Federation | G0062     | 1              | 1.00 | 0.99 | 0.98 | 0.96 | 0.94 | 0.90 | 0.86 | 0.82 | 0.78 | 0.74 | 0.68 | 0.62 | 0.57 | 0.52  | 0.48  | 0.37  | 0.34  |
| Russian Federation | G0089     | 1              | 0.98 | 0.85 | 0.66 | 0.49 | 0.40 | 0.36 | 0.32 | 0.29 | 0.29 | 0.29 | 0.29 | 0.27 | 0.24 | 0.19  | 0.13  | 0.12  | 0.10  |
| Russian Federation | G0091     | 1              | 1.00 | 0.99 | 0.98 | 0.97 | 0.96 | 0.93 | 0.91 | 0.89 | 0.86 | 0.81 | 0.70 | 0.57 | 0.45 | 0.32  | 0.24  | 0.15  | 0.14  |
| Russian Federation | G0100     | 1              | 1.00 | 1.00 | 0.98 | 0.96 | 0.93 | 0.90 | 0.86 | 0.82 | 0.79 | 0.77 | 0.74 | 0.73 | 0.71 | 0.69  | 0.64  | 0.52  | 0.41  |
| Russian Federation | G0116     | 1              | 1.00 | 0.99 | 0.99 | 0.97 | 0.95 | 0.91 | 0.87 | 0.82 | 0.76 | 0.70 | 0.59 | 0.51 | 0.46 | 0.42  | 0.37  | 0.25  | 0.21  |
| Russian Federation | G0126     | 1              | 1.00 | 1.00 | 0.99 | 0.98 | 0.98 | 0.97 | 0.96 | 0.95 | 0.93 | 0.90 | 0.85 | 0.80 | 0.76 | 0.72  | 0.68  | 0.56  | 0.45  |
| Russian Federation | G0129     | 1              | 1.00 | 1.00 | 0.99 | 0.97 | 0.94 | 0.91 | 0.87 | 0.83 | 0.79 | 0.74 | 0.66 | 0.58 | 0.51 | 0.44  | 0.38  | 0.28  | 0.20  |
| Russian Federation | G0141     | 1              | 1.00 | 1.00 | 0.99 | 0.99 | 0.98 | 0.96 | 0.95 | 0.92 | 0.90 | 0.87 | 0.80 | 0.73 | 0.66 | 0.58  | 0.48  | 0.22  | 0.07  |
| Russian Federation | G0142     | 1              | 1.00 | 1.00 | 0.99 | 0.99 | 0.98 | 0.97 | 0.95 | 0.93 | 0.91 | 0.88 | 0.83 | 0.78 | 0.73 | 0.66  | 0.56  | 0.38  | 0.21  |
| Russian Federation | G0155     | 1              | 1.00 | 1.00 | 0.99 | 0.97 | 0.94 | 0.91 | 0.88 | 0.85 | 0.83 | 0.81 | 0.76 | 0.72 | 0.68 | 0.64  | 0.59  | 0.48  | 0.39  |
| Russian Federation | G0166     | 1              | 1.00 | 1.00 | 1.00 | 1.00 | 1.00 | 0.99 | 0.99 | 0.99 | 0.98 | 0.97 | 0.95 | 0.92 | 0.89 | 0.85  | 0.82  | 0.73  | 0.63  |
| Russian Federation | G0191     | 1              | 1.00 | 1.00 | 0.99 | 0.98 | 0.97 | 0.96 | 0.93 | 0.91 | 0.88 | 0.85 | 0.79 | 0.73 | 0.69 | 0.65  | 0.62  | 0.56  | 0.51  |
| Russian Federation | G0194     | 1              | 1.00 | 1.00 | 0.99 | 0.99 | 0.97 | 0.95 | 0.89 | 0.81 | 0.73 | 0.66 | 0.56 | 0.48 | 0.42 | 0.36  | 0.32  | 0.21  | 0.09  |
| Russian Federation | G0195     | 1              | 1.00 | 1.00 | 0.99 | 0.99 | 0.98 | 0.97 | 0.96 | 0.94 | 0.93 | 0.92 | 0.88 | 0.81 | 0.71 | 0.61  | 0.52  | 0.26  | 0.02  |
| Russian Federation | G0197     | 1              | 1.00 | 1.00 | 0.99 | 0.98 | 0.97 | 0.95 | 0.94 | 0.92 | 0.90 | 0.88 | 0.83 | 0.77 | 0.72 | 0.67  | 0.63  | 0.56  | 0.51  |
| Russian Federation | G0204     | 1              | 1.00 | 0.99 | 0.98 | 0.96 | 0.94 | 0.93 | 0.91 | 0.90 | 0.89 | 0.88 | 0.85 | 0.82 | 0.79 | 0.75  | 0.72  | 0.63  | 0.55  |
| Russian Federation | G0205     | 1              | 1.00 | 0.99 | 0.98 | 0.96 | 0.94 | 0.91 | 0.88 | 0.84 | 0.81 | 0.76 | 0.62 | 0.45 | 0.28 | 0.16  | 0.07  | -0.08 | -0.18 |
| Russian Federation | G0206     | 1              | 1.00 | 1.00 | 0.99 | 0.99 | 0.97 | 0.95 | 0.93 | 0.90 | 0.88 | 0.86 | 0.81 | 0.76 | 0.72 | 0.68  | 0.63  | 0.48  | 0.36  |
| Russian Federation | G0207     | 1              | 1.00 | 0.99 | 0.96 | 0.92 | 0.85 | 0.76 | 0.67 | 0.57 | 0.49 | 0.41 | 0.28 | 0.15 | 0.02 | -0.10 | -0.21 | -0.41 | -0.55 |
| Russian Federation | G0208     | 1              | 1.00 | 0.98 | 0.94 | 0.89 | 0.83 | 0.77 | 0.71 | 0.67 | 0.63 | 0.61 | 0.55 | 0.50 | 0.46 | 0.43  | 0.37  | 0.25  | 0.16  |
| Russian Federation | G0209     | 1              | 1.00 | 1.00 | 0.99 | 0.98 | 0.97 | 0.95 | 0.94 | 0.92 | 0.91 | 0.89 | 0.84 | 0.78 | 0.73 | 0.67  | 0.60  | 0.34  | 0.18  |
| Russian Federation | G0216     | 1              | 1.00 | 1.00 | 1.00 | 0.99 | 0.99 | 0.99 | 0.97 | 0.93 | 0.88 | 0.82 | 0.65 | 0.50 | 0.36 | 0.22  | 0.13  | -0.08 | -0.18 |

| Country            | GloFAS ID | Station filter | LT1  | LT2  | LT3  | LT4  | LT5  | LT6  | LT7  | LT8  | LT9  | LT10 | LT12 | LT14 | LT16 | LT18  | LT20  | LT25  | L30   |
|--------------------|-----------|----------------|------|------|------|------|------|------|------|------|------|------|------|------|------|-------|-------|-------|-------|
| Russian Federation | G0221     | 1              | 1.00 | 1.00 | 1.00 | 0.99 | 0.99 | 0.97 | 0.94 | 0.91 | 0.85 | 0.81 | 0.73 | 0.62 | 0.53 | 0.45  | 0.37  | 0.20  | 0.08  |
| Russian Federation | G0223     | 1              | 1.00 | 1.00 | 0.99 | 0.96 | 0.87 | 0.71 | 0.52 | 0.37 | 0.27 | 0.20 | 0.10 | 0.05 | 0.02 | -0.01 | -0.03 | -0.08 | -0.13 |
| Russian Federation | G0229     | 1              | 1.00 | 0.99 | 0.99 | 0.99 | 0.98 | 0.97 | 0.96 | 0.94 | 0.91 | 0.88 | 0.83 | 0.78 | 0.76 | 0.73  | 0.71  | 0.70  | 0.69  |
| Russian Federation | G0231     | 1              | 0.98 | 0.93 | 0.86 | 0.78 | 0.70 | 0.61 | 0.52 | 0.45 | 0.39 | 0.33 | 0.23 | 0.14 | 0.04 | -0.11 | -0.28 | -0.57 | -0.65 |
| Russian Federation | G0253     | 1              | 1.00 | 1.00 | 1.00 | 0.99 | 0.99 | 0.98 | 0.97 | 0.95 | 0.93 | 0.91 | 0.89 | 0.87 | 0.85 | 0.84  | 0.83  | 0.79  | 0.75  |
| Russian Federation | G0264     | 1              | 1.00 | 1.00 | 0.99 | 0.98 | 0.97 | 0.96 | 0.95 | 0.94 | 0.93 | 0.91 | 0.87 | 0.80 | 0.66 | 0.51  | 0.41  | 0.30  | 0.26  |
| Russian Federation | G0282     | 1              | 1.00 | 1.00 | 1.00 | 0.99 | 0.98 | 0.95 | 0.89 | 0.80 | 0.71 | 0.63 | 0.50 | 0.41 | 0.35 | 0.29  | 0.25  | 0.15  | 0.13  |
| Russian Federation | G0289     | 1              | 0.99 | 0.96 | 0.93 | 0.89 | 0.84 | 0.80 | 0.76 | 0.74 | 0.72 | 0.69 | 0.65 | 0.62 | 0.59 | 0.58  | 0.56  | 0.51  | 0.47  |
| Russian Federation | G0312     | 1              | 1.00 | 0.97 | 0.91 | 0.82 | 0.73 | 0.65 | 0.58 | 0.52 | 0.47 | 0.42 | 0.34 | 0.28 | 0.23 | 0.15  | 0.07  | -0.03 | -0.11 |
| Russian Federation | G0314     | 1              | 1.00 | 0.98 | 0.96 | 0.92 | 0.87 | 0.82 | 0.77 | 0.73 | 0.69 | 0.67 | 0.61 | 0.58 | 0.53 | 0.49  | 0.47  | 0.44  | 0.38  |
| Russian Federation | G0327     | 1              | 1.00 | 1.00 | 0.99 | 0.98 | 0.97 | 0.95 | 0.92 | 0.89 | 0.85 | 0.81 | 0.73 | 0.65 | 0.57 | 0.51  | 0.47  | 0.40  | 0.38  |
| Russian Federation | G0341     | 1              | 1.00 | 0.98 | 0.92 | 0.82 | 0.72 | 0.64 | 0.57 | 0.50 | 0.44 | 0.40 | 0.32 | 0.26 | 0.20 | 0.19  | 0.21  | 0.29  | 0.27  |
| Russian Federation | G0376     | 1              | 1.00 | 0.98 | 0.96 | 0.92 | 0.88 | 0.83 | 0.78 | 0.73 | 0.69 | 0.67 | 0.61 | 0.57 | 0.52 | 0.48  | 0.46  | 0.42  | 0.37  |
| Russian Federation | G0409     | 1              | 0.98 | 0.90 | 0.80 | 0.73 | 0.67 | 0.62 | 0.58 | 0.55 | 0.53 | 0.51 | 0.47 | 0.44 | 0.40 | 0.40  | 0.39  | 0.35  | 0.30  |
| Russian Federation | G0457     | 1              | 1.00 | 0.99 | 0.97 | 0.93 | 0.89 | 0.85 | 0.81 | 0.78 | 0.75 | 0.73 | 0.68 | 0.65 | 0.61 | 0.59  | 0.58  | 0.56  | 0.50  |
| Russian Federation | G1514     | 1              | 0.99 | 0.96 | 0.90 | 0.81 | 0.74 | 0.67 | 0.63 | 0.61 | 0.59 | 0.57 | 0.55 | 0.52 | 0.48 | 0.43  | 0.39  | 0.33  | 0.29  |
| Russian Federation | G1515     | 1              | 0.97 | 0.88 | 0.79 | 0.70 | 0.63 | 0.61 | 0.58 | 0.57 | 0.55 | 0.53 | 0.51 | 0.45 | 0.42 | 0.35  | 0.29  | 0.25  | 0.21  |
| Russian Federation | G1516     | 1              | 0.97 | 0.87 | 0.71 | 0.53 | 0.39 | 0.32 | 0.28 | 0.25 | 0.23 | 0.22 | 0.21 | 0.18 | 0.13 | 0.00  | -0.06 | -0.02 | 0.00  |
| Russian Federation | G1517     | 1              | 1.00 | 0.98 | 0.95 | 0.90 | 0.84 | 0.78 | 0.71 | 0.65 | 0.58 | 0.52 | 0.43 | 0.38 | 0.37 | 0.36  | 0.32  | 0.27  | 0.27  |
| Russian Federation | G1518     | 1              | 0.99 | 0.97 | 0.92 | 0.88 | 0.83 | 0.77 | 0.71 | 0.67 | 0.63 | 0.60 | 0.56 | 0.51 | 0.46 | 0.40  | 0.37  | 0.28  | 0.23  |
| Russian Federation | G1519     | 1              | 1.00 | 0.99 | 0.97 | 0.95 | 0.92 | 0.89 | 0.86 | 0.83 | 0.80 | 0.77 | 0.72 | 0.67 | 0.63 | 0.59  | 0.52  | 0.38  | 0.28  |
| Russian Federation | G1520     | 1              | 1.00 | 0.99 | 0.97 | 0.96 | 0.94 | 0.92 | 0.89 | 0.87 | 0.85 | 0.83 | 0.79 | 0.75 | 0.72 | 0.68  | 0.66  | 0.60  | 0.55  |
| Russian Federation | G1521     | 1              | 0.98 | 0.91 | 0.82 | 0.77 | 0.71 | 0.67 | 0.63 | 0.59 | 0.57 | 0.54 | 0.48 | 0.43 | 0.38 | 0.32  | 0.28  | 0.18  | 0.10  |
| Russian Federation | G1522     | 1              | 0.99 | 0.97 | 0.94 | 0.89 | 0.85 | 0.81 | 0.77 | 0.73 | 0.70 | 0.66 | 0.61 | 0.57 | 0.54 | 0.51  | 0.49  | 0.45  | 0.44  |
| Russian Federation | G1523     | 1              | 0.99 | 0.92 | 0.84 | 0.77 | 0.71 | 0.65 | 0.61 | 0.57 | 0.53 | 0.50 | 0.45 | 0.40 | 0.38 | 0.35  | 0.32  | 0.30  | 0.26  |
| Russian Federation | G1524     | 1              | 1.00 | 0.99 | 0.97 | 0.95 | 0.92 | 0.89 | 0.85 | 0.82 | 0.79 | 0.76 | 0.70 | 0.65 | 0.60 | 0.56  | 0.52  | 0.44  | 0.40  |
| Russian Federation | G1525     | 1              | 1.00 | 1.00 | 0.99 | 0.99 | 0.99 | 0.98 | 0.97 | 0.97 | 0.96 | 0.95 | 0.93 | 0.89 | 0.85 | 0.80  | 0.73  | 0.56  | 0.40  |
| Russian Federation | G1526     | 1              | 1.00 | 0.99 | 0.98 | 0.95 | 0.92 | 0.87 | 0.83 | 0.78 | 0.73 | 0.68 | 0.59 | 0.54 | 0.49 | 0.46  | 0.43  | 0.40  | 0.33  |
| Russian Federation | G1527     | 1              | 0.98 | 0.92 | 0.85 | 0.79 | 0.74 | 0.70 | 0.67 | 0.66 | 0.65 | 0.63 | 0.60 | 0.57 | 0.56 | 0.53  | 0.51  | 0.48  | 0.45  |
| Russian Federation | G1528     | 1              | 1.00 | 0.99 | 0.97 | 0.94 | 0.91 | 0.87 | 0.82 | 0.77 | 0.73 | 0.68 | 0.61 | 0.56 | 0.51 | 0.46  | 0.43  | 0.38  | 0.36  |
| Russian Federation | G1529     | 1              | 1.00 | 1.00 | 0.99 | 0.99 | 0.98 | 0.96 | 0.94 | 0.92 | 0.89 | 0.84 | 0.74 | 0.68 | 0.62 | 0.57  | 0.53  | 0.46  | 0.37  |
| Russian Federation | G1530     | 1              | 1.00 | 1.00 | 0.99 | 0.98 | 0.96 | 0.94 | 0.91 | 0.89 | 0.85 | 0.79 | 0.69 | 0.62 | 0.55 | 0.49  | 0.45  | 0.34  | 0.27  |
| Russian Federation | G1531     | 1              | 1.00 | 0.98 | 0.93 | 0.88 | 0.81 | 0.73 | 0.65 | 0.58 | 0.51 | 0.45 | 0.36 | 0.32 | 0.31 | 0.34  | 0.34  | 0.28  | 0.27  |
| Russian Federation | G1532     | 1              | 0.99 | 0.97 | 0.94 | 0.90 | 0.85 | 0.79 | 0.74 | 0.68 | 0.62 | 0.58 | 0.53 | 0.50 | 0.46 | 0.41  | 0.37  | 0.32  | 0.29  |
| Russian Federation | G1533     | 1              | 1.00 | 1.00 | 0.99 | 0.99 | 0.97 | 0.95 | 0.91 | 0.87 | 0.82 | 0.77 | 0.69 | 0.62 | 0.56 | 0.51  | 0.48  | 0.41  | 0.34  |
| Russian Federation | G1534     | 1              | 0.99 | 0.98 | 0.96 | 0.92 | 0.88 | 0.83 | 0.78 | 0.72 | 0.67 | 0.62 | 0.52 | 0.45 | 0.40 | 0.38  | 0.36  | 0.30  | 0.25  |
| Russian Federation | G1535     | 1              | 1.00 | 0.99 | 0.98 | 0.97 | 0.94 | 0.92 | 0.88 | 0.83 | 0.79 | 0.74 | 0.67 | 0.59 | 0.53 | 0.48  | 0.44  | 0.36  | 0.31  |
| Russian Federation | G1536     | 1              | 1.00 | 1.00 | 0.99 | 0.97 | 0.95 | 0.93 | 0.91 | 0.88 | 0.85 | 0.83 | 0.79 | 0.74 | 0.70 | 0.66  | 0.63  | 0.53  | 0.45  |
| Russian Federation | G1537     | 1              | 1.00 | 0.96 | 0.87 | 0.75 | 0.65 | 0.58 | 0.53 | 0.49 | 0.47 | 0.45 | 0.39 | 0.36 | 0.33 | 0.32  | 0.30  | 0.25  | 0.25  |



| Country            | GloFAS ID | Station filter | LT1  | LT2  | LT3  | LT4  | LT5   | LT6   | LT7   | LT8   | LT9   | LT10  | LT12  | LT14  | LT16  | LT18  | LT20  | LT25  | L30   |
|--------------------|-----------|----------------|------|------|------|------|-------|-------|-------|-------|-------|-------|-------|-------|-------|-------|-------|-------|-------|
| Russian Federation | G1538     | 1              | 1.00 | 0.97 | 0.91 | 0.81 | 0.71  | 0.63  | 0.56  | 0.51  | 0.47  | 0.43  | 0.38  | 0.34  | 0.31  | 0.29  | 0.26  | 0.19  | 0.16  |
| Russian Federation | G1539     | 1              | 0.93 | 0.79 | 0.65 | 0.54 | 0.47  | 0.40  | 0.35  | 0.32  | 0.29  | 0.26  | 0.19  | 0.15  | 0.12  | 0.16  | 0.13  | 0.14  | 0.12  |
| Russian Federation | G1540     | 1              | 0.99 | 0.94 | 0.80 | 0.61 | 0.44  | 0.31  | 0.22  | 0.15  | 0.09  | 0.05  | 0.00  | -0.05 | -0.08 | -0.13 | -0.17 | -0.22 | -0.25 |
| Russian Federation | G1541     | 1              | 1.00 | 0.98 | 0.92 | 0.77 | 0.59  | 0.43  | 0.31  | 0.22  | 0.15  | 0.09  | 0.01  | -0.05 | -0.08 | -0.12 | -0.16 | -0.23 | -0.26 |
| Russian Federation | G1542     | 1              | 0.99 | 0.91 | 0.78 | 0.65 | 0.54  | 0.45  | 0.39  | 0.33  | 0.28  | 0.24  | 0.19  | 0.14  | 0.10  | 0.08  | 0.05  | 0.00  | -0.05 |
| Russian Federation | G1543     | 1              | 0.99 | 0.94 | 0.85 | 0.74 | 0.64  | 0.55  | 0.51  | 0.48  | 0.46  | 0.44  | 0.41  | 0.39  | 0.37  | 0.34  | 0.29  | 0.19  | 0.12  |
| Russian Federation | G1544     | 1              | 1.00 | 0.98 | 0.92 | 0.78 | 0.62  | 0.48  | 0.38  | 0.30  | 0.25  | 0.19  | 0.11  | 0.09  | 0.07  | 0.01  | -0.04 | -0.07 | -0.08 |
| Russian Federation | G1545     | 1              | 0.99 | 0.96 | 0.91 | 0.87 | 0.84  | 0.81  | 0.79  | 0.76  | 0.73  | 0.71  | 0.66  | 0.63  | 0.59  | 0.53  | 0.49  | 0.41  | 0.32  |
| Russian Federation | G1546     | 1              | 0.88 | 0.67 | 0.48 | 0.34 | 0.23  | 0.16  | 0.10  | 0.07  | 0.04  | 0.02  | -0.04 | -0.07 | -0.08 | -0.02 | 0.00  | 0.02  | 0.00  |
| Russian Federation | G1547     | 1              | 0.95 | 0.82 | 0.66 | 0.51 | 0.38  | 0.27  | 0.19  | 0.12  | 0.05  | 0.00  | -0.07 | -0.13 | -0.17 | -0.13 | -0.14 | -0.12 | -0.10 |
| Russian Federation | G1548     | 1              | 0.99 | 0.94 | 0.76 | 0.40 | -0.09 | -0.57 | -0.91 | -1.15 | -1.32 | -1.42 | -1.56 | -1.63 | -1.71 | -1.73 | -1.73 | -1.77 | -1.80 |
| Russian Federation | G1549     | 1              | 0.99 | 0.97 | 0.89 | 0.70 | 0.26  | -0.45 | -1.24 | -1.94 | -2.43 | -2.77 | -3.13 | -3.36 | -3.50 | -3.64 | -3.76 | -3.97 | -4.03 |
| Russian Federation | G1550     | 1              | 1.00 | 0.99 | 0.95 | 0.84 | 0.64  | 0.41  | 0.21  | 0.06  | -0.05 | -0.14 | -0.25 | -0.31 | -0.35 | -0.41 | -0.50 | -0.72 | -0.89 |
| Russian Federation | G1551     | 1              | 1.00 | 0.98 | 0.92 | 0.83 | 0.72  | 0.63  | 0.55  | 0.50  | 0.46  | 0.43  | 0.39  | 0.36  | 0.35  | 0.30  | 0.26  | 0.22  | 0.20  |
| Russian Federation | G1552     | 1              | 0.99 | 0.96 | 0.90 | 0.80 | 0.67  | 0.54  | 0.41  | 0.30  | 0.22  | 0.16  | 0.07  | 0.03  | 0.02  | 0.05  | 0.20  | 0.35  | 0.33  |
| Russian Federation | G1553     | 1              | 0.99 | 0.96 | 0.86 | 0.73 | 0.58  | 0.45  | 0.35  | 0.28  | 0.24  | 0.21  | 0.18  | 0.19  | 0.19  | 0.23  | 0.32  | 0.39  | 0.37  |
| Russian Federation | G1554     | 1              | 0.99 | 0.97 | 0.92 | 0.84 | 0.75  | 0.64  | 0.53  | 0.42  | 0.33  | 0.26  | 0.16  | 0.11  | 0.10  | 0.16  | 0.26  | 0.36  | 0.35  |
| Russian Federation | G1555     | 1              | 0.99 | 0.97 | 0.94 | 0.90 | 0.85  | 0.79  | 0.72  | 0.66  | 0.60  | 0.54  | 0.45  | 0.37  | 0.31  | 0.26  | 0.22  | 0.18  | 0.13  |
| Russian Federation | G1556     | 1              | 0.99 | 0.96 | 0.90 | 0.81 | 0.70  | 0.61  | 0.54  | 0.46  | 0.43  | 0.41  | 0.34  | 0.31  | 0.27  | 0.26  | 0.26  | 0.21  | 0.16  |
| Russian Federation | G1557     | 1              | 1.00 | 0.99 | 0.95 | 0.89 | 0.82  | 0.74  | 0.67  | 0.60  | 0.54  | 0.49  | 0.42  | 0.37  | 0.34  | 0.33  | 0.31  | 0.26  | 0.23  |
| Russian Federation | G1558     | 1              | 0.98 | 0.90 | 0.78 | 0.67 | 0.58  | 0.52  | 0.49  | 0.46  | 0.43  | 0.40  | 0.38  | 0.35  | 0.32  | 0.28  | 0.26  | 0.21  | 0.15  |
| Russian Federation | G1559     | 1              | 1.00 | 0.96 | 0.81 | 0.54 | 0.30  | 0.14  | 0.05  | -0.01 | -0.05 | -0.07 | -0.08 | -0.03 | 0.00  | 0.07  | 0.19  | 0.27  | 0.31  |
| Russian Federation | G1560     | 1              | 1.00 | 0.99 | 0.99 | 0.97 | 0.95  | 0.91  | 0.86  | 0.79  | 0.72  | 0.65  | 0.53  | 0.43  | 0.36  | 0.30  | 0.24  | 0.19  | 0.22  |
| Russian Federation | G1561     | 1              | 1.00 | 0.99 | 0.98 | 0.95 | 0.91  | 0.84  | 0.77  | 0.70  | 0.63  | 0.56  | 0.46  | 0.38  | 0.35  | 0.33  | 0.32  | 0.30  | 0.27  |
| Russian Federation | G1803     | 1              | 1.00 | 1.00 | 0.99 | 0.98 | 0.95  | 0.93  | 0.90  | 0.87  | 0.84  | 0.82  | 0.78  | 0.75  | 0.71  | 0.69  | 0.67  | 0.60  | 0.51  |
| Russian Federation | G1804     | 1              | 1.00 | 1.00 | 0.99 | 0.99 | 0.98  | 0.96  | 0.94  | 0.92  | 0.88  | 0.82  | 0.67  | 0.52  | 0.41  | 0.34  | 0.28  | 0.19  | 0.11  |
| Russian Federation | G1805     | 1              | 1.00 | 1.00 | 0.99 | 0.99 | 0.97  | 0.95  | 0.93  | 0.89  | 0.85  | 0.81  | 0.70  | 0.54  | 0.40  | 0.29  | 0.23  | 0.15  | 0.11  |
| Russian Federation | G1806     | 1              | 1.00 | 1.00 | 0.99 | 0.98 | 0.96  | 0.94  | 0.92  | 0.89  | 0.86  | 0.82  | 0.74  | 0.63  | 0.50  | 0.36  | 0.25  | 0.10  | 0.04  |
| Russian Federation | G1807     | 1              | 1.00 | 1.00 | 0.99 | 0.98 | 0.96  | 0.94  | 0.92  | 0.90  | 0.87  | 0.84  | 0.76  | 0.69  | 0.61  | 0.54  | 0.47  | 0.30  | 0.17  |
| Russian Federation | G1808     | 1              | 1.00 | 1.00 | 0.99 | 0.98 | 0.96  | 0.93  | 0.89  | 0.84  | 0.77  | 0.70  | 0.57  | 0.45  | 0.35  | 0.27  | 0.20  | 0.09  | 0.08  |
| Russian Federation | G2005     | 1              | 0.99 | 0.97 | 0.92 | 0.85 | 0.75  | 0.67  | 0.61  | 0.55  | 0.49  | 0.43  | 0.34  | 0.32  | 0.26  | 0.23  | 0.22  | 0.21  | 0.21  |
| Russian Federation | G2006     | 1              | 0.99 | 0.97 | 0.93 | 0.86 | 0.80  | 0.73  | 0.68  | 0.63  | 0.58  | 0.52  | 0.43  | 0.39  | 0.35  | 0.30  | 0.28  | 0.29  | 0.27  |
| Russian Federation | G2007     | 1              | 0.97 | 0.86 | 0.75 | 0.69 | 0.62  | 0.57  | 0.52  | 0.44  | 0.38  | 0.34  | 0.29  | 0.27  | 0.23  | 0.20  | 0.22  | 0.18  | 0.18  |
| Russian Federation | G2008     | 1              | 0.99 | 0.95 | 0.87 | 0.80 | 0.73  | 0.66  | 0.62  | 0.59  | 0.51  | 0.46  | 0.37  | 0.35  | 0.29  | 0.25  | 0.26  | 0.25  | 0.26  |
| Russian Federation | G2009     | 1              | 0.92 | 0.74 | 0.60 | 0.56 | 0.50  | 0.46  | 0.46  | 0.41  | 0.34  | 0.33  | 0.25  | 0.26  | 0.19  | 0.20  | 0.21  | 0.19  | 0.18  |
| Russian Federation | G2010     | 1              | 0.98 | 0.90 | 0.74 | 0.63 | 0.53  | 0.47  | 0.43  | 0.40  | 0.35  | 0.32  | 0.25  | 0.24  | 0.19  | 0.16  | 0.17  | 0.15  | 0.10  |
| Russian Federation | G2011     | 1              | 0.97 | 0.85 | 0.69 | 0.60 | 0.53  | 0.49  | 0.46  | 0.44  | 0.40  | 0.38  | 0.31  | 0.29  | 0.24  | 0.22  | 0.23  | 0.21  | 0.16  |
| Russian Federation | G2012     | 1              | 1.00 | 0.98 | 0.96 | 0.92 | 0.88  | 0.83  | 0.79  | 0.75  | 0.71  | 0.66  | 0.59  | 0.55  | 0.48  | 0.44  | 0.40  | 0.33  | 0.33  |
| Russian Federation | G2013     | 1              | 0.98 | 0.92 | 0.83 | 0.74 | 0.68  | 0.63  | 0.57  | 0.54  | 0.50  | 0.46  | 0.40  | 0.34  | 0.33  | 0.31  | 0.32  | 0.31  | 0.29  |



| Country            | GloFAS ID | Station filter | LT1  | LT2  | LT3  | LT4  | LT5  | LT6  | LT7  | LT8  | LT9  | LT10 | LT12 | LT14 | LT16 | LT18 | LT20 | LT25 | L30  |
|--------------------|-----------|----------------|------|------|------|------|------|------|------|------|------|------|------|------|------|------|------|------|------|
| Russian Federation | G2014     | 1              | 1.00 | 0.99 | 0.97 | 0.95 | 0.93 | 0.90 | 0.87 | 0.84 | 0.80 | 0.77 | 0.69 | 0.62 | 0.57 | 0.54 | 0.50 | 0.45 | 0.39 |
| Russian Federation | G2015     | 1              | 0.98 | 0.91 | 0.83 | 0.74 | 0.69 | 0.62 | 0.57 | 0.52 | 0.48 | 0.44 | 0.35 | 0.33 | 0.28 | 0.29 | 0.30 | 0.29 | 0.29 |
| Russian Federation | G2016     | 1              | 1.00 | 0.99 | 0.96 | 0.94 | 0.91 | 0.88 | 0.84 | 0.81 | 0.77 | 0.74 | 0.66 | 0.59 | 0.53 | 0.51 | 0.48 | 0.45 | 0.41 |
| Russian Federation | G2017     | 1              | 0.99 | 0.98 | 0.96 | 0.94 | 0.91 | 0.89 | 0.86 | 0.82 | 0.79 | 0.75 | 0.68 | 0.62 | 0.58 | 0.53 | 0.50 | 0.40 | 0.36 |
| Russian Federation | G2018     | 1              | 1.00 | 0.99 | 0.98 | 0.96 | 0.94 | 0.91 | 0.89 | 0.86 | 0.83 | 0.79 | 0.72 | 0.65 | 0.60 | 0.56 | 0.52 | 0.42 | 0.38 |
| Russian Federation | G2019     | 1              | 1.00 | 0.99 | 0.98 | 0.97 | 0.95 | 0.93 | 0.91 | 0.88 | 0.84 | 0.81 | 0.75 | 0.69 | 0.64 | 0.59 | 0.55 | 0.45 | 0.40 |
| Russian Federation | G2020     | 1              | 1.00 | 0.99 | 0.98 | 0.97 | 0.94 | 0.92 | 0.90 | 0.88 | 0.85 | 0.83 | 0.76 | 0.70 | 0.66 | 0.63 | 0.59 | 0.54 | 0.49 |
| Russian Federation | G2021     | 1              | 0.99 | 0.96 | 0.89 | 0.80 | 0.72 | 0.64 | 0.56 | 0.48 | 0.41 | 0.36 | 0.30 | 0.32 | 0.31 | 0.29 | 0.28 | 0.25 | 0.26 |
| Russian Federation | G2022     | 1              | 1.00 | 0.97 | 0.93 | 0.87 | 0.80 | 0.75 | 0.68 | 0.60 | 0.55 | 0.52 | 0.41 | 0.37 | 0.36 | 0.35 | 0.34 | 0.32 | 0.29 |
| Russian Federation | G2023     | 1              | 0.99 | 0.97 | 0.92 | 0.84 | 0.77 | 0.71 | 0.66 | 0.60 | 0.56 | 0.52 | 0.45 | 0.43 | 0.41 | 0.40 | 0.41 | 0.45 | 0.40 |
| Russian Federation | G2024     | 1              | 1.00 | 1.00 | 0.99 | 0.98 | 0.97 | 0.96 | 0.94 | 0.92 | 0.90 | 0.88 | 0.84 | 0.79 | 0.73 | 0.68 | 0.64 | 0.59 | 0.55 |
| Russian Federation | G2025     | 1              | 1.00 | 1.00 | 0.99 | 0.98 | 0.97 | 0.96 | 0.94 | 0.91 | 0.88 | 0.87 | 0.83 | 0.81 | 0.79 | 0.77 | 0.76 | 0.68 | 0.56 |
| Russian Federation | G2026     | 1              | 0.99 | 0.97 | 0.92 | 0.85 | 0.79 | 0.75 | 0.70 | 0.66 | 0.62 | 0.58 | 0.50 | 0.48 | 0.46 | 0.42 | 0.41 | 0.42 | 0.40 |
| Russian Federation | G2027     | 1              | 0.99 | 0.94 | 0.84 | 0.69 | 0.61 | 0.57 | 0.55 | 0.55 | 0.51 | 0.48 | 0.45 | 0.42 | 0.42 | 0.37 | 0.35 | 0.31 | 0.31 |
| Russian Federation | G2028     | 1              | 0.98 | 0.91 | 0.79 | 0.66 | 0.63 | 0.62 | 0.59 | 0.57 | 0.54 | 0.50 | 0.48 | 0.46 | 0.45 | 0.34 | 0.35 | 0.29 | 0.33 |
| Russian Federation | G2029     | 1              | 1.00 | 0.99 | 0.99 | 0.98 | 0.96 | 0.94 | 0.92 | 0.90 | 0.87 | 0.84 | 0.77 | 0.72 | 0.67 | 0.63 | 0.61 | 0.54 | 0.48 |
| Russian Federation | G2030     | 1              | 0.96 | 0.85 | 0.71 | 0.57 | 0.48 | 0.43 | 0.38 | 0.32 | 0.30 | 0.26 | 0.22 | 0.20 | 0.20 | 0.19 | 0.21 | 0.26 | 0.32 |
| Russian Federation | G2031     | 1              | 0.99 | 0.96 | 0.92 | 0.87 | 0.82 | 0.78 | 0.76 | 0.72 | 0.68 | 0.65 | 0.58 | 0.53 | 0.50 | 0.48 | 0.45 | 0.39 | 0.35 |
| Russian Federation | G2032     | 1              | 1.00 | 1.00 | 0.99 | 0.99 | 0.98 | 0.97 | 0.95 | 0.93 | 0.92 | 0.90 | 0.84 | 0.79 | 0.73 | 0.67 | 0.61 | 0.54 | 0.49 |
| Russian Federation | G2033     | 1              | 0.94 | 0.83 | 0.72 | 0.65 | 0.62 | 0.59 | 0.55 | 0.51 | 0.49 | 0.46 | 0.45 | 0.44 | 0.45 | 0.44 | 0.46 | 0.43 | 0.39 |
| Russian Federation | G2034     | 1              | 1.00 | 0.99 | 0.97 | 0.92 | 0.87 | 0.81 | 0.75 | 0.72 | 0.70 | 0.66 | 0.58 | 0.50 | 0.44 | 0.38 | 0.33 | 0.28 | 0.28 |
| Russian Federation | G2035     | 1              | 0.97 | 0.87 | 0.74 | 0.68 | 0.66 | 0.66 | 0.63 | 0.60 | 0.57 | 0.53 | 0.49 | 0.47 | 0.48 | 0.44 | 0.45 | 0.42 | 0.40 |
| Russian Federation | G2036     | 1              | 0.98 | 0.89 | 0.74 | 0.59 | 0.48 | 0.43 | 0.42 | 0.39 | 0.37 | 0.39 | 0.39 | 0.40 | 0.38 | 0.35 | 0.33 | 0.21 | 0.27 |
| Russian Federation | G2037     | 1              | 0.99 | 0.94 | 0.87 | 0.78 | 0.69 | 0.61 | 0.54 | 0.49 | 0.45 | 0.41 | 0.36 | 0.32 | 0.30 | 0.29 | 0.32 | 0.37 | 0.33 |
| Russian Federation | G2038     | 1              | 0.98 | 0.91 | 0.81 | 0.73 | 0.67 | 0.60 | 0.53 | 0.47 | 0.44 | 0.40 | 0.36 | 0.34 | 0.33 | 0.34 | 0.36 | 0.39 | 0.35 |
| Russian Federation | G2039     | 1              | 0.93 | 0.81 | 0.74 | 0.70 | 0.68 | 0.65 | 0.61 | 0.58 | 0.54 | 0.50 | 0.50 | 0.48 | 0.45 | 0.42 | 0.43 | 0.41 | 0.37 |
| Russian Federation | G2040     | 1              | 0.98 | 0.91 | 0.82 | 0.73 | 0.67 | 0.61 | 0.56 | 0.50 | 0.46 | 0.42 | 0.37 | 0.38 | 0.36 | 0.34 | 0.36 | 0.37 | 0.35 |
| Russian Federation | G2041     | 1              | 1.00 | 1.00 | 0.99 | 0.98 | 0.97 | 0.96 | 0.95 | 0.93 | 0.91 | 0.89 | 0.83 | 0.78 | 0.72 | 0.66 | 0.61 | 0.54 | 0.49 |
| Russian Federation | G2042     | 1              | 0.95 | 0.82 | 0.71 | 0.63 | 0.58 | 0.54 | 0.46 | 0.42 | 0.40 | 0.37 | 0.38 | 0.36 | 0.38 | 0.38 | 0.39 | 0.34 | 0.32 |
| Russian Federation | G2043     | 1              | 0.99 | 0.96 | 0.93 | 0.88 | 0.81 | 0.75 | 0.69 | 0.67 | 0.65 | 0.61 | 0.56 | 0.53 | 0.50 | 0.50 | 0.49 | 0.45 | 0.41 |
| Russian Federation | G2044     | 1              | 0.99 | 0.94 | 0.86 | 0.76 | 0.69 | 0.68 | 0.66 | 0.63 | 0.59 | 0.57 | 0.52 | 0.49 | 0.50 | 0.46 | 0.43 | 0.42 | 0.37 |
| Russian Federation | G2045     | 1              | 0.87 | 0.63 | 0.50 | 0.41 | 0.36 | 0.38 | 0.36 | 0.30 | 0.32 | 0.34 | 0.34 | 0.32 | 0.29 | 0.23 | 0.23 | 0.17 | 0.22 |
| Russian Federation | G2046     | 1              | 0.99 | 0.97 | 0.95 | 0.93 | 0.90 | 0.89 | 0.87 | 0.85 | 0.83 | 0.82 | 0.80 | 0.78 | 0.75 | 0.71 | 0.68 | 0.56 | 0.47 |
| Russian Federation | G2047     | 1              | 1.00 | 0.99 | 0.98 | 0.96 | 0.94 | 0.91 | 0.88 | 0.85 | 0.81 | 0.77 | 0.70 | 0.65 | 0.62 | 0.60 | 0.57 | 0.50 | 0.42 |
| Russian Federation | G2048     | 1              | 0.99 | 0.92 | 0.82 | 0.74 | 0.67 | 0.65 | 0.63 | 0.58 | 0.54 | 0.53 | 0.50 | 0.49 | 0.49 | 0.47 | 0.45 | 0.43 | 0.38 |
| Russian Federation | G2049     | 1              | 0.99 | 0.94 | 0.85 | 0.74 | 0.70 | 0.70 | 0.68 | 0.67 | 0.65 | 0.61 | 0.55 | 0.48 | 0.49 | 0.42 | 0.40 | 0.39 | 0.34 |
| Russian Federation | G2050     | 1              | 0.97 | 0.84 | 0.70 | 0.60 | 0.55 | 0.52 | 0.50 | 0.48 | 0.48 | 0.47 | 0.48 | 0.44 | 0.42 | 0.42 | 0.44 | 0.38 | 0.35 |
| Russian Federation | G2051     | 1              | 1.00 | 1.00 | 0.99 | 0.98 | 0.97 | 0.96 | 0.94 | 0.92 | 0.90 | 0.87 | 0.80 | 0.74 | 0.70 | 0.67 | 0.65 | 0.63 | 0.57 |
| Russian Federation | G2052     | 1              | 0.99 | 0.94 | 0.84 | 0.73 | 0.64 | 0.61 | 0.59 | 0.54 | 0.51 | 0.49 | 0.50 | 0.44 | 0.41 | 0.34 | 0.25 | 0.24 | 0.22 |

| Country            | GloFAS ID | Station filter | LT1  | LT2  | LT3  | LT4  | LT5  | LT6  | LT7  | LT8  | LT9   | LT10  | LT12  | LT14  | LT16  | LT18  | LT20  | LT25  | L30  |
|--------------------|-----------|----------------|------|------|------|------|------|------|------|------|-------|-------|-------|-------|-------|-------|-------|-------|------|
| Russian Federation | G2053     | 1              | 0.94 | 0.83 | 0.73 | 0.66 | 0.63 | 0.60 | 0.55 | 0.51 | 0.49  | 0.45  | 0.46  | 0.43  | 0.45  | 0.44  | 0.46  | 0.42  | 0.40 |
| Russian Federation | G2054     | 1              | 1.00 | 0.99 | 0.99 | 0.98 | 0.97 | 0.95 | 0.94 | 0.92 | 0.91  | 0.89  | 0.87  | 0.84  | 0.81  | 0.77  | 0.75  | 0.62  | 0.51 |
| Russian Federation | G2055     | 1              | 0.96 | 0.85 | 0.75 | 0.68 | 0.64 | 0.60 | 0.55 | 0.51 | 0.47  | 0.43  | 0.43  | 0.41  | 0.42  | 0.41  | 0.45  | 0.42  | 0.40 |
| Russian Federation | G2056     | 1              | 0.99 | 0.93 | 0.86 | 0.78 | 0.71 | 0.66 | 0.63 | 0.60 | 0.56  | 0.53  | 0.50  | 0.49  | 0.48  | 0.47  | 0.47  | 0.42  | 0.38 |
| Russian Federation | G2057     | 1              | 0.99 | 0.94 | 0.87 | 0.79 | 0.74 | 0.69 | 0.65 | 0.61 | 0.57  | 0.52  | 0.49  | 0.48  | 0.47  | 0.45  | 0.47  | 0.45  | 0.42 |
| Russian Federation | G2058     | 1              | 1.00 | 1.00 | 0.99 | 0.98 | 0.95 | 0.91 | 0.87 | 0.82 | 0.78  | 0.74  | 0.68  | 0.64  | 0.61  | 0.58  | 0.55  | 0.45  | 0.36 |
| Russian Federation | G2059     | 1              | 1.00 | 0.99 | 0.98 | 0.97 | 0.96 | 0.94 | 0.92 | 0.91 | 0.89  | 0.86  | 0.82  | 0.77  | 0.70  | 0.64  | 0.59  | 0.54  | 0.48 |
| Russian Federation | G2060     | 1              | 0.98 | 0.91 | 0.81 | 0.74 | 0.70 | 0.68 | 0.66 | 0.63 | 0.60  | 0.57  | 0.53  | 0.52  | 0.50  | 0.48  | 0.47  | 0.46  | 0.40 |
| Russian Federation | G2061     | 1              | 1.00 | 0.98 | 0.93 | 0.85 | 0.78 | 0.72 | 0.64 | 0.55 | 0.47  | 0.40  | 0.30  | 0.26  | 0.24  | 0.24  | 0.24  | 0.25  | 0.32 |
| Russian Federation | G2062     | 1              | 1.00 | 1.00 | 0.99 | 0.98 | 0.96 | 0.92 | 0.88 | 0.85 | 0.81  | 0.77  | 0.69  | 0.62  | 0.57  | 0.54  | 0.52  | 0.48  | 0.44 |
| Russian Federation | G2063     | 1              | 1.00 | 0.98 | 0.95 | 0.91 | 0.86 | 0.80 | 0.75 | 0.72 | 0.69  | 0.66  | 0.62  | 0.61  | 0.59  | 0.56  | 0.54  | 0.47  | 0.39 |
| Russian Federation | G2064     | 1              | 1.00 | 0.99 | 0.96 | 0.92 | 0.88 | 0.83 | 0.78 | 0.73 | 0.68  | 0.64  | 0.56  | 0.51  | 0.48  | 0.44  | 0.41  | 0.39  | 0.36 |
| Russian Federation | G2065     | 1              | 0.98 | 0.90 | 0.71 | 0.46 | 0.30 | 0.19 | 0.09 | 0.02 | -0.05 | -0.07 | -0.04 | -0.07 | -0.10 | -0.11 | -0.10 | -0.01 | 0.08 |
| Russian Federation | G2066     | 1              | 1.00 | 0.99 | 0.97 | 0.94 | 0.90 | 0.85 | 0.79 | 0.75 | 0.71  | 0.67  | 0.62  | 0.58  | 0.56  | 0.52  | 0.48  | 0.41  | 0.37 |
| Russian Federation | G2067     | 1              | 1.00 | 0.99 | 0.95 | 0.86 | 0.78 | 0.71 | 0.65 | 0.62 | 0.62  | 0.62  | 0.61  | 0.59  | 0.57  | 0.54  | 0.51  | 0.45  | 0.38 |
| Russian Federation | G2068     | 1              | 1.00 | 1.00 | 1.00 | 0.99 | 0.99 | 0.98 | 0.97 | 0.96 | 0.95  | 0.93  | 0.90  | 0.87  | 0.83  | 0.76  | 0.70  | 0.52  | 0.40 |
| Russian Federation | G2069     | 1              | 0.99 | 0.95 | 0.89 | 0.80 | 0.72 | 0.64 | 0.60 | 0.58 | 0.54  | 0.50  | 0.47  | 0.46  | 0.43  | 0.41  | 0.42  | 0.42  | 0.36 |
| Russian Federation | G2070     | 1              | 0.99 | 0.95 | 0.88 | 0.80 | 0.73 | 0.65 | 0.54 | 0.46 | 0.40  | 0.36  | 0.29  | 0.28  | 0.28  | 0.27  | 0.30  | 0.30  | 0.35 |
| Russian Federation | G2071     | 1              | 0.99 | 0.96 | 0.87 | 0.78 | 0.70 | 0.61 | 0.51 | 0.43 | 0.37  | 0.33  | 0.28  | 0.25  | 0.25  | 0.25  | 0.26  | 0.25  | 0.29 |
| Russian Federation | G2072     | 1              | 1.00 | 1.00 | 0.99 | 0.98 | 0.97 | 0.97 | 0.96 | 0.94 | 0.93  | 0.92  | 0.89  | 0.86  | 0.83  | 0.78  | 0.75  | 0.62  | 0.51 |
| Russian Federation | G2073     | 1              | 1.00 | 0.99 | 0.97 | 0.93 | 0.88 | 0.84 | 0.80 | 0.77 | 0.74  | 0.72  | 0.67  | 0.63  | 0.60  | 0.56  | 0.51  | 0.40  | 0.30 |
| Russian Federation | G2074     | 1              | 1.00 | 0.99 | 0.98 | 0.94 | 0.90 | 0.86 | 0.81 | 0.77 | 0.72  | 0.69  | 0.63  | 0.60  | 0.57  | 0.55  | 0.51  | 0.45  | 0.38 |
| Russian Federation | G2075     | 1              | 1.00 | 0.99 | 0.96 | 0.92 | 0.88 | 0.81 | 0.74 | 0.69 | 0.66  | 0.63  | 0.57  | 0.56  | 0.54  | 0.53  | 0.53  | 0.46  | 0.40 |
| Russian Federation | G2076     | 1              | 1.00 | 1.00 | 0.99 | 0.98 | 0.96 | 0.93 | 0.88 | 0.82 | 0.76  | 0.70  | 0.61  | 0.55  | 0.53  | 0.50  | 0.50  | 0.47  | 0.44 |
| Russian Federation | G2077     | 1              | 1.00 | 0.99 | 0.96 | 0.93 | 0.91 | 0.88 | 0.85 | 0.80 | 0.74  | 0.70  | 0.61  | 0.56  | 0.53  | 0.51  | 0.50  | 0.47  | 0.43 |
| Russian Federation | G2078     | 1              | 0.98 | 0.91 | 0.83 | 0.75 | 0.72 | 0.70 | 0.69 | 0.67 | 0.63  | 0.60  | 0.52  | 0.46  | 0.44  | 0.37  | 0.36  | 0.37  | 0.29 |
| Russian Federation | G2079     | 1              | 0.96 | 0.84 | 0.71 | 0.59 | 0.51 | 0.46 | 0.42 | 0.38 | 0.37  | 0.35  | 0.31  | 0.27  | 0.29  | 0.30  | 0.30  | 0.31  | 0.32 |
| Russian Federation | G2080     | 1              | 0.96 | 0.83 | 0.68 | 0.57 | 0.50 | 0.42 | 0.40 | 0.36 | 0.33  | 0.29  | 0.27  | 0.26  | 0.26  | 0.26  | 0.27  | 0.23  | 0.27 |
| Russian Federation | G2082     | 1              | 0.98 | 0.86 | 0.71 | 0.63 | 0.59 | 0.57 | 0.56 | 0.54 | 0.54  | 0.53  | 0.53  | 0.53  | 0.50  | 0.47  | 0.43  | 0.39  | 0.32 |
| Russian Federation | G2083     | 1              | 0.98 | 0.86 | 0.67 | 0.54 | 0.48 | 0.45 | 0.42 | 0.41 | 0.41  | 0.41  | 0.42  | 0.41  | 0.39  | 0.37  | 0.36  | 0.31  | 0.26 |
| Russian Federation | G2084     | 1              | 1.00 | 0.99 | 0.98 | 0.96 | 0.94 | 0.90 | 0.87 | 0.85 | 0.82  | 0.80  | 0.76  | 0.70  | 0.65  | 0.61  | 0.56  | 0.52  | 0.50 |
| Russian Federation | G2085     | 1              | 1.00 | 1.00 | 0.99 | 0.97 | 0.95 | 0.92 | 0.89 | 0.86 | 0.84  | 0.82  | 0.77  | 0.72  | 0.67  | 0.62  | 0.57  | 0.53  | 0.49 |
| Russian Federation | G2086     | 1              | 1.00 | 0.99 | 0.98 | 0.97 | 0.95 | 0.93 | 0.90 | 0.86 | 0.83  | 0.79  | 0.72  | 0.67  | 0.61  | 0.57  | 0.53  | 0.45  | 0.40 |
| Russian Federation | G2087     | 1              | 1.00 | 0.98 | 0.93 | 0.83 | 0.71 | 0.60 | 0.52 | 0.46 | 0.41  | 0.37  | 0.34  | 0.31  | 0.31  | 0.32  | 0.33  | 0.30  | 0.30 |
| Russian Federation | G2088     | 1              | 0.94 | 0.81 | 0.69 | 0.57 | 0.47 | 0.39 | 0.35 | 0.36 | 0.34  | 0.31  | 0.29  | 0.27  | 0.27  | 0.29  | 0.27  | 0.33  | 0.33 |
| Russian Federation | G2089     | 1              | 0.99 | 0.93 | 0.84 | 0.75 | 0.63 | 0.48 | 0.37 | 0.31 | 0.28  | 0.27  | 0.24  | 0.21  | 0.23  | 0.23  | 0.25  | 0.25  | 0.30 |
| Russian Federation | G2090     | 1              | 0.94 | 0.80 | 0.67 | 0.56 | 0.49 | 0.44 | 0.40 | 0.38 | 0.37  | 0.35  | 0.31  | 0.28  | 0.30  | 0.31  | 0.31  | 0.31  | 0.32 |
| Russian Federation | G2091     | 1              | 1.00 | 0.98 | 0.95 | 0.91 | 0.86 | 0.81 | 0.76 | 0.71 | 0.66  | 0.61  | 0.55  | 0.50  | 0.46  | 0.44  | 0.43  | 0.41  | 0.37 |
| Russian Federation | G2092     | 1              | 0.99 | 0.98 | 0.95 | 0.90 | 0.83 | 0.77 | 0.70 | 0.64 | 0.59  | 0.55  | 0.50  | 0.47  | 0.44  | 0.43  | 0.42  | 0.39  | 0.34 |

| Country            | GloFAS ID | Station filter | LT1  | LT2  | LT3  | LT4  | LT5  | LT6  | LT7  | LT8  | LT9  | LT10 | LT12 | LT14 | LT16 | LT18 | LT20 | LT25 | L30   |
|--------------------|-----------|----------------|------|------|------|------|------|------|------|------|------|------|------|------|------|------|------|------|-------|
| Russian Federation | G2093     | 1              | 0.98 | 0.90 | 0.77 | 0.64 | 0.48 | 0.35 | 0.28 | 0.28 | 0.28 | 0.26 | 0.25 | 0.26 | 0.27 | 0.29 | 0.31 | 0.32 | 0.33  |
| Russian Federation | G2094     | 1              | 1.00 | 1.00 | 0.99 | 0.98 | 0.97 | 0.96 | 0.95 | 0.94 | 0.93 | 0.91 | 0.88 | 0.83 | 0.79 | 0.74 | 0.67 | 0.53 | 0.41  |
| Russian Federation | G2095     | 1              | 1.00 | 0.99 | 0.99 | 0.98 | 0.97 | 0.96 | 0.95 | 0.94 | 0.93 | 0.91 | 0.84 | 0.76 | 0.69 | 0.63 | 0.60 | 0.55 | 0.48  |
| Russian Federation | G2096     | 1              | 1.00 | 0.99 | 0.97 | 0.93 | 0.87 | 0.81 | 0.75 | 0.69 | 0.63 | 0.59 | 0.54 | 0.49 | 0.46 | 0.44 | 0.43 | 0.40 | 0.35  |
| Russian Federation | G2097     | 1              | 0.98 | 0.91 | 0.81 | 0.73 | 0.66 | 0.63 | 0.60 | 0.57 | 0.53 | 0.51 | 0.46 | 0.43 | 0.42 | 0.39 | 0.39 | 0.39 | 0.31  |
| Russian Federation | G2098     | 1              | 1.00 | 0.99 | 0.99 | 0.97 | 0.96 | 0.95 | 0.93 | 0.91 | 0.89 | 0.87 | 0.83 | 0.80 | 0.77 | 0.73 | 0.68 | 0.56 | 0.45  |
| Russian Federation | G2099     | 1              | 0.96 | 0.79 | 0.61 | 0.52 | 0.46 | 0.43 | 0.45 | 0.47 | 0.48 | 0.48 | 0.49 | 0.48 | 0.46 | 0.42 | 0.39 | 0.32 | 0.27  |
| Russian Federation | G2100     | 1              | 0.97 | 0.87 | 0.77 | 0.70 | 0.68 | 0.65 | 0.63 | 0.58 | 0.55 | 0.53 | 0.50 | 0.47 | 0.47 | 0.44 | 0.44 | 0.43 | 0.37  |
| Russian Federation | G2101     | 1              | 1.00 | 0.99 | 0.98 | 0.97 | 0.96 | 0.94 | 0.92 | 0.90 | 0.88 | 0.86 | 0.82 | 0.80 | 0.77 | 0.72 | 0.66 | 0.55 | 0.44  |
| Russian Federation | G2102     | 1              | 1.00 | 0.99 | 0.97 | 0.94 | 0.91 | 0.88 | 0.84 | 0.80 | 0.75 | 0.72 | 0.66 | 0.61 | 0.57 | 0.53 | 0.48 | 0.38 | 0.28  |
| Russian Federation | G2103     | 1              | 0.98 | 0.88 | 0.72 | 0.58 | 0.49 | 0.42 | 0.39 | 0.37 | 0.35 | 0.34 | 0.32 | 0.30 | 0.28 | 0.29 | 0.23 | 0.18 | 0.16  |
| Russian Federation | G2104     | 1              | 1.00 | 0.98 | 0.94 | 0.89 | 0.82 | 0.76 | 0.71 | 0.66 | 0.61 | 0.59 | 0.52 | 0.44 | 0.42 | 0.41 | 0.40 | 0.36 | 0.33  |
| Russian Federation | G2105     | 1              | 1.00 | 1.00 | 0.99 | 0.97 | 0.96 | 0.93 | 0.91 | 0.88 | 0.85 | 0.82 | 0.78 | 0.75 | 0.72 | 0.69 | 0.67 | 0.60 | 0.52  |
| Russian Federation | G2106     | 1              | 0.97 | 0.90 | 0.81 | 0.76 | 0.72 | 0.68 | 0.65 | 0.64 | 0.61 | 0.57 | 0.52 | 0.51 | 0.49 | 0.47 | 0.44 | 0.41 | 0.38  |
| Russian Federation | G2107     | 1              | 0.98 | 0.90 | 0.80 | 0.73 | 0.67 | 0.63 | 0.60 | 0.57 | 0.55 | 0.54 | 0.49 | 0.48 | 0.47 | 0.43 | 0.42 | 0.34 | 0.27  |
| Russian Federation | G2108     | 1              | 0.94 | 0.80 | 0.70 | 0.63 | 0.60 | 0.58 | 0.55 | 0.51 | 0.50 | 0.48 | 0.44 | 0.46 | 0.44 | 0.40 | 0.38 | 0.29 | 0.24  |
| Russian Federation | G2111     | 1              | 0.98 | 0.89 | 0.76 | 0.70 | 0.67 | 0.65 | 0.62 | 0.59 | 0.55 | 0.54 | 0.53 | 0.53 | 0.51 | 0.48 | 0.45 | 0.39 | 0.35  |
| Russian Federation | G2112     | 1              | 0.99 | 0.96 | 0.93 | 0.88 | 0.81 | 0.75 | 0.72 | 0.68 | 0.64 | 0.60 | 0.55 | 0.53 | 0.52 | 0.48 | 0.45 | 0.38 | 0.30  |
| Russian Federation | G2113     | 1              | 1.00 | 0.96 | 0.89 | 0.79 | 0.70 | 0.66 | 0.61 | 0.56 | 0.54 | 0.52 | 0.49 | 0.44 | 0.44 | 0.44 | 0.41 | 0.36 | 0.32  |
| Russian Federation | G2115     | 1              | 1.00 | 0.98 | 0.94 | 0.90 | 0.84 | 0.78 | 0.75 | 0.73 | 0.70 | 0.67 | 0.61 | 0.57 | 0.55 | 0.52 | 0.49 | 0.44 | 0.37  |
| Russian Federation | G2116     | 1              | 0.95 | 0.81 | 0.65 | 0.54 | 0.47 | 0.42 | 0.40 | 0.38 | 0.36 | 0.35 | 0.31 | 0.30 | 0.28 | 0.26 | 0.23 | 0.17 | 0.13  |
| Russian Federation | G2117     | 1              | 0.99 | 0.91 | 0.72 | 0.54 | 0.43 | 0.36 | 0.31 | 0.27 | 0.24 | 0.24 | 0.21 | 0.22 | 0.23 | 0.25 | 0.26 | 0.25 | 0.26  |
| Russian Federation | G2118     | 1              | 1.00 | 0.99 | 0.97 | 0.94 | 0.89 | 0.84 | 0.80 | 0.74 | 0.68 | 0.63 | 0.53 | 0.46 | 0.41 | 0.38 | 0.34 | 0.31 | 0.29  |
| Russian Federation | G2120     | 1              | 1.00 | 1.00 | 1.00 | 0.99 | 0.99 | 0.98 | 0.98 | 0.97 | 0.96 | 0.95 | 0.93 | 0.88 | 0.83 | 0.75 | 0.67 | 0.48 | 0.30  |
| Russian Federation | G2121     | 1              | 0.96 | 0.83 | 0.69 | 0.59 | 0.52 | 0.47 | 0.44 | 0.42 | 0.40 | 0.38 | 0.34 | 0.32 | 0.30 | 0.27 | 0.25 | 0.20 | 0.15  |
| Russian Federation | G2122     | 1              | 0.95 | 0.82 | 0.69 | 0.59 | 0.53 | 0.48 | 0.45 | 0.43 | 0.41 | 0.39 | 0.36 | 0.33 | 0.30 | 0.29 | 0.27 | 0.22 | 0.19  |
| Russian Federation | G2123     | 1              | 0.99 | 0.95 | 0.91 | 0.84 | 0.77 | 0.70 | 0.66 | 0.61 | 0.54 | 0.48 | 0.42 | 0.41 | 0.38 | 0.38 | 0.36 | 0.34 | 0.31  |
| Russian Federation | G2124     | 1              | 1.00 | 0.99 | 0.98 | 0.96 | 0.91 | 0.85 | 0.79 | 0.73 | 0.68 | 0.64 | 0.59 | 0.51 | 0.45 | 0.42 | 0.38 | 0.34 | 0.31  |
| Russian Federation | G2125     | 1              | 0.99 | 0.94 | 0.85 | 0.72 | 0.61 | 0.55 | 0.51 | 0.46 | 0.41 | 0.36 | 0.28 | 0.25 | 0.22 | 0.20 | 0.19 | 0.19 | 0.17  |
| Russian Federation | G2126     | 1              | 0.99 | 0.95 | 0.88 | 0.81 | 0.72 | 0.63 | 0.56 | 0.52 | 0.48 | 0.44 | 0.41 | 0.37 | 0.36 | 0.35 | 0.34 | 0.33 | 0.35  |
| Russian Federation | G2127     | 1              | 1.00 | 0.99 | 0.98 | 0.95 | 0.89 | 0.80 | 0.69 | 0.58 | 0.48 | 0.40 | 0.30 | 0.25 | 0.22 | 0.18 | 0.12 | 0.09 | 0.08  |
| Russian Federation | G2128     | 1              | 1.00 | 0.98 | 0.95 | 0.89 | 0.82 | 0.76 | 0.71 | 0.66 | 0.63 | 0.59 | 0.53 | 0.47 | 0.42 | 0.40 | 0.37 | 0.34 | 0.33  |
| Russian Federation | G2129     | 1              | 1.00 | 0.99 | 0.98 | 0.96 | 0.96 | 0.95 | 0.94 | 0.93 | 0.92 | 0.91 | 0.89 | 0.84 | 0.78 | 0.74 | 0.70 | 0.53 | 0.45  |
| Russian Federation | G2130     | 1              | 1.00 | 0.99 | 0.99 | 0.98 | 0.98 | 0.97 | 0.96 | 0.96 | 0.95 | 0.94 | 0.92 | 0.87 | 0.81 | 0.76 | 0.72 | 0.55 | 0.46  |
| Russian Federation | G2131     | 1              | 0.99 | 0.95 | 0.87 | 0.79 | 0.70 | 0.60 | 0.53 | 0.48 | 0.42 | 0.37 | 0.31 | 0.25 | 0.22 | 0.21 | 0.20 | 0.18 | 0.17  |
| Russian Federation | G2132     | 1              | 1.00 | 0.99 | 0.99 | 0.98 | 0.97 | 0.96 | 0.96 | 0.94 | 0.93 | 0.91 | 0.86 | 0.81 | 0.74 | 0.65 | 0.58 | 0.45 | 0.37  |
| Russian Federation | G2133     | 1              | 1.00 | 0.98 | 0.94 | 0.89 | 0.83 | 0.78 | 0.74 | 0.72 | 0.67 | 0.61 | 0.54 | 0.51 | 0.45 | 0.40 | 0.35 | 0.32 | 0.29  |
| Russian Federation | G2139     | 1              | 0.99 | 0.97 | 0.91 | 0.85 | 0.77 | 0.73 | 0.70 | 0.68 | 0.62 | 0.58 | 0.52 | 0.51 | 0.49 | 0.47 | 0.44 | 0.38 | 0.36  |
| Russian Federation | G2140     | 1              | 0.98 | 0.80 | 0.47 | 0.24 | 0.15 | 0.11 | 0.09 | 0.11 | 0.12 | 0.12 | 0.15 | 0.19 | 0.19 | 0.16 | 0.13 | 0.02 | -0.06 |

| Country            | GloFAS ID | Station filter | LT1  | LT2  | LT3  | LT4  | LT5  | LT6  | LT7  | LT8  | LT9  | LT10 | LT12 | LT14 | LT16 | LT18 | LT20 | LT25 | L30  |
|--------------------|-----------|----------------|------|------|------|------|------|------|------|------|------|------|------|------|------|------|------|------|------|
| Russian Federation | G2141     | 1              | 0.96 | 0.85 | 0.69 | 0.59 | 0.56 | 0.53 | 0.48 | 0.44 | 0.39 | 0.36 | 0.30 | 0.28 | 0.25 | 0.27 | 0.26 | 0.24 | 0.24 |
| Russian Federation | G2142     | 1              | 1.00 | 1.00 | 0.99 | 0.99 | 0.98 | 0.97 | 0.96 | 0.95 | 0.93 | 0.91 | 0.87 | 0.81 | 0.73 | 0.64 | 0.57 | 0.44 | 0.36 |
| Russian Federation | G2143     | 1              | 1.00 | 0.98 | 0.93 | 0.87 | 0.80 | 0.71 | 0.64 | 0.60 | 0.55 | 0.49 | 0.40 | 0.33 | 0.32 | 0.29 | 0.31 | 0.28 | 0.28 |
| Russian Federation | G2144     | 1              | 1.00 | 1.00 | 1.00 | 0.99 | 0.99 | 0.99 | 0.98 | 0.97 | 0.96 | 0.95 | 0.92 | 0.87 | 0.80 | 0.72 | 0.64 | 0.45 | 0.28 |
| Russian Federation | G2145     | 1              | 0.98 | 0.90 | 0.79 | 0.70 | 0.65 | 0.59 | 0.52 | 0.47 | 0.41 | 0.39 | 0.35 | 0.31 | 0.28 | 0.27 | 0.27 | 0.24 | 0.22 |
| Russian Federation | G2146     | 1              | 0.99 | 0.97 | 0.94 | 0.92 | 0.91 | 0.89 | 0.87 | 0.86 | 0.85 | 0.83 | 0.81 | 0.78 | 0.75 | 0.73 | 0.70 | 0.61 | 0.51 |
| Russian Federation | G2147     | 1              | 0.98 | 0.91 | 0.79 | 0.69 | 0.63 | 0.59 | 0.55 | 0.50 | 0.48 | 0.47 | 0.43 | 0.43 | 0.39 | 0.37 | 0.35 | 0.33 | 0.32 |
| Russian Federation | G2148     | 1              | 0.94 | 0.80 | 0.62 | 0.48 | 0.40 | 0.33 | 0.28 | 0.24 | 0.21 | 0.17 | 0.13 | 0.10 | 0.11 | 0.11 | 0.11 | 0.11 | 0.13 |
| Russian Federation | G2149     | 1              | 0.95 | 0.85 | 0.76 | 0.71 | 0.66 | 0.60 | 0.55 | 0.54 | 0.51 | 0.48 | 0.43 | 0.39 | 0.36 | 0.34 | 0.33 | 0.30 | 0.28 |
| Russian Federation | G2150     | 1              | 1.00 | 0.98 | 0.94 | 0.89 | 0.84 | 0.80 | 0.76 | 0.73 | 0.69 | 0.65 | 0.60 | 0.59 | 0.55 | 0.52 | 0.50 | 0.45 | 0.40 |
| Russian Federation | G2151     | 1              | 1.00 | 1.00 | 0.99 | 0.99 | 0.97 | 0.96 | 0.93 | 0.89 | 0.85 | 0.80 | 0.71 | 0.65 | 0.61 | 0.59 | 0.57 | 0.52 | 0.45 |
| Russian Federation | G2152     | 1              | 0.99 | 0.95 | 0.86 | 0.78 | 0.72 | 0.68 | 0.66 | 0.64 | 0.60 | 0.56 | 0.48 | 0.45 | 0.46 | 0.42 | 0.41 | 0.38 | 0.37 |
| Russian Federation | G2153     | 1              | 0.92 | 0.74 | 0.60 | 0.55 | 0.52 | 0.48 | 0.44 | 0.42 | 0.40 | 0.37 | 0.31 | 0.27 | 0.30 | 0.26 | 0.27 | 0.27 | 0.27 |
| Russian Federation | G2154     | 1              | 0.99 | 0.93 | 0.84 | 0.73 | 0.64 | 0.58 | 0.54 | 0.50 | 0.46 | 0.43 | 0.36 | 0.34 | 0.28 | 0.32 | 0.28 | 0.28 | 0.26 |
| Russian Federation | G2158     | 1              | 1.00 | 1.00 | 0.99 | 0.99 | 0.97 | 0.95 | 0.92 | 0.88 | 0.83 | 0.78 | 0.70 | 0.64 | 0.60 | 0.59 | 0.57 | 0.51 | 0.44 |
| Russian Federation | G2159     | 1              | 1.00 | 1.00 | 1.00 | 0.99 | 0.99 | 0.98 | 0.97 | 0.95 | 0.93 | 0.91 | 0.85 | 0.78 | 0.69 | 0.60 | 0.53 | 0.41 | 0.34 |
| Russian Federation | G2160     | 1              | 0.97 | 0.86 | 0.73 | 0.63 | 0.58 | 0.53 | 0.47 | 0.44 | 0.40 | 0.34 | 0.32 | 0.28 | 0.30 | 0.27 | 0.27 | 0.24 | 0.22 |
| Russian Federation | G2162     | 1              | 0.99 | 0.92 | 0.83 | 0.76 | 0.72 | 0.67 | 0.65 | 0.62 | 0.60 | 0.57 | 0.53 | 0.50 | 0.45 | 0.41 | 0.40 | 0.36 | 0.32 |
| Russian Federation | G2163     | 1              | 0.99 | 0.94 | 0.89 | 0.79 | 0.68 | 0.60 | 0.55 | 0.49 | 0.43 | 0.39 | 0.34 | 0.34 | 0.31 | 0.31 | 0.31 | 0.33 | 0.35 |
| Russian Federation | G2165     | 1              | 1.00 | 1.00 | 0.99 | 0.98 | 0.97 | 0.95 | 0.93 | 0.89 | 0.85 | 0.81 | 0.71 | 0.64 | 0.58 | 0.56 | 0.54 | 0.51 | 0.47 |
| Russian Federation | G2166     | 1              | 0.99 | 0.93 | 0.81 | 0.68 | 0.58 | 0.51 | 0.47 | 0.45 | 0.43 | 0.41 | 0.37 | 0.32 | 0.29 | 0.28 | 0.25 | 0.19 | 0.16 |
| Russian Federation | G2167     | 1              | 1.00 | 0.99 | 0.98 | 0.95 | 0.93 | 0.90 | 0.88 | 0.85 | 0.82 | 0.78 | 0.69 | 0.61 | 0.55 | 0.49 | 0.44 | 0.34 | 0.26 |
| Russian Federation | G2169     | 1              | 1.00 | 1.00 | 0.99 | 0.98 | 0.96 | 0.93 | 0.89 | 0.84 | 0.79 | 0.74 | 0.67 | 0.63 | 0.60 | 0.58 | 0.57 | 0.50 | 0.41 |
| Russian Federation | G2170     | 1              | 1.00 | 1.00 | 0.99 | 0.97 | 0.94 | 0.92 | 0.89 | 0.86 | 0.83 | 0.81 | 0.78 | 0.75 | 0.72 | 0.69 | 0.67 | 0.60 | 0.50 |
| Russian Federation | G2171     | 1              | 1.00 | 1.00 | 0.99 | 0.98 | 0.96 | 0.92 | 0.88 | 0.83 | 0.77 | 0.70 | 0.58 | 0.48 | 0.41 | 0.37 | 0.35 | 0.30 | 0.26 |
| Russian Federation | G2172     | 1              | 0.99 | 0.92 | 0.79 | 0.63 | 0.47 | 0.34 | 0.26 | 0.23 | 0.22 | 0.23 | 0.25 | 0.24 | 0.23 | 0.23 | 0.22 | 0.20 | 0.21 |
| Russian Federation | G2173     | 1              | 0.96 | 0.81 | 0.66 | 0.57 | 0.50 | 0.46 | 0.45 | 0.43 | 0.37 | 0.30 | 0.27 | 0.29 | 0.28 | 0.28 | 0.28 | 0.26 | 0.25 |
| Russian Federation | G2174     | 1              | 0.99 | 0.96 | 0.90 | 0.84 | 0.79 | 0.74 | 0.69 | 0.65 | 0.62 | 0.59 | 0.52 | 0.48 | 0.46 | 0.44 | 0.42 | 0.38 | 0.36 |
| Russian Federation | G2175     | 1              | 0.99 | 0.97 | 0.92 | 0.87 | 0.82 | 0.78 | 0.72 | 0.68 | 0.63 | 0.58 | 0.54 | 0.48 | 0.46 | 0.42 | 0.40 | 0.35 | 0.32 |
| Russian Federation | G2176     | 1              | 0.95 | 0.84 | 0.74 | 0.68 | 0.65 | 0.62 | 0.59 | 0.59 | 0.56 | 0.52 | 0.44 | 0.40 | 0.39 | 0.32 | 0.37 | 0.32 | 0.31 |
| Russian Federation | G2177     | 1              | 0.99 | 0.95 | 0.89 | 0.81 | 0.72 | 0.66 | 0.64 | 0.60 | 0.58 | 0.57 | 0.52 | 0.44 | 0.41 | 0.40 | 0.38 | 0.37 | 0.36 |
| Russian Federation | G2178     | 1              | 0.91 | 0.73 | 0.57 | 0.46 | 0.39 | 0.35 | 0.35 | 0.28 | 0.17 | 0.14 | 0.19 | 0.19 | 0.21 | 0.17 | 0.21 | 0.15 | 0.16 |
| Russian Federation | G2179     | 1              | 0.97 | 0.86 | 0.75 | 0.65 | 0.60 | 0.55 | 0.51 | 0.49 | 0.47 | 0.45 | 0.38 | 0.34 | 0.34 | 0.33 | 0.33 | 0.28 | 0.25 |
| Russian Federation | G2180     | 1              | 1.00 | 0.98 | 0.96 | 0.93 | 0.88 | 0.81 | 0.76 | 0.73 | 0.67 | 0.61 | 0.51 | 0.45 | 0.44 | 0.40 | 0.39 | 0.35 | 0.34 |
| Russian Federation | G2181     | 1              | 0.91 | 0.77 | 0.64 | 0.55 | 0.52 | 0.50 | 0.45 | 0.44 | 0.43 | 0.40 | 0.35 | 0.34 | 0.31 | 0.27 | 0.25 | 0.17 | 0.11 |
| Russian Federation | G2182     | 1              | 0.96 | 0.84 | 0.75 | 0.71 | 0.66 | 0.62 | 0.58 | 0.58 | 0.56 | 0.52 | 0.45 | 0.41 | 0.39 | 0.32 | 0.38 | 0.31 | 0.31 |
| Russian Federation | G2183     | 1              | 1.00 | 0.98 | 0.96 | 0.93 | 0.88 | 0.84 | 0.81 | 0.77 | 0.74 | 0.71 | 0.60 | 0.53 | 0.49 | 0.46 | 0.44 | 0.41 | 0.37 |
| Russian Federation | G2184     | 1              | 0.99 | 0.96 | 0.92 | 0.88 | 0.84 | 0.80 | 0.77 | 0.74 | 0.72 | 0.69 | 0.58 | 0.52 | 0.48 | 0.45 | 0.44 | 0.41 | 0.36 |
| Russian Federation | G2185     | 1              | 1.00 | 0.99 | 0.96 | 0.92 | 0.88 | 0.81 | 0.72 | 0.67 | 0.65 | 0.63 | 0.55 | 0.51 | 0.46 | 0.46 | 0.44 | 0.39 | 0.36 |

| Country            | GloFAS ID | Station filter | LT1  | LT2  | LT3  | LT4  | LT5  | LT6  | LT7  | LT8   | LT9  | LT10 | LT12  | LT14  | LT16  | LT18  | LT20  | LT25 | L30  |
|--------------------|-----------|----------------|------|------|------|------|------|------|------|-------|------|------|-------|-------|-------|-------|-------|------|------|
| Russian Federation | G2186     | 1              | 1.00 | 1.00 | 1.00 | 1.00 | 1.00 | 0.99 | 0.99 | 0.99  | 0.98 | 0.98 | 0.95  | 0.92  | 0.87  | 0.82  | 0.77  | 0.65 | 0.48 |
| Russian Federation | G2187     | 1              | 1.00 | 0.99 | 0.98 | 0.97 | 0.96 | 0.94 | 0.91 | 0.87  | 0.82 | 0.78 | 0.70  | 0.62  | 0.52  | 0.46  | 0.42  | 0.35 | 0.31 |
| Russian Federation | G2188     | 1              | 1.00 | 1.00 | 1.00 | 0.99 | 0.97 | 0.93 | 0.89 | 0.82  | 0.76 | 0.71 | 0.62  | 0.52  | 0.43  | 0.39  | 0.37  | 0.31 | 0.30 |
| Russian Federation | G2189     | 1              | 0.97 | 0.87 | 0.77 | 0.69 | 0.64 | 0.60 | 0.57 | 0.56  | 0.55 | 0.52 | 0.46  | 0.42  | 0.42  | 0.42  | 0.42  | 0.40 | 0.38 |
| Russian Federation | G2193     | 1              | 0.99 | 0.96 | 0.88 | 0.78 | 0.69 | 0.64 | 0.60 | 0.56  | 0.51 | 0.47 | 0.42  | 0.40  | 0.35  | 0.33  | 0.30  | 0.20 | 0.19 |
| Russian Federation | G2194     | 1              | 0.98 | 0.91 | 0.79 | 0.67 | 0.58 | 0.51 | 0.47 | 0.44  | 0.42 | 0.41 | 0.40  | 0.38  | 0.36  | 0.30  | 0.25  | 0.17 | 0.13 |
| Russian Federation | G2195     | 1              | 1.00 | 0.98 | 0.93 | 0.88 | 0.84 | 0.79 | 0.75 | 0.73  | 0.70 | 0.65 | 0.55  | 0.51  | 0.48  | 0.45  | 0.43  | 0.38 | 0.36 |
| Russian Federation | G2196     | 1              | 1.00 | 0.98 | 0.97 | 0.96 | 0.94 | 0.92 | 0.88 | 0.83  | 0.78 | 0.74 | 0.65  | 0.55  | 0.48  | 0.45  | 0.41  | 0.38 | 0.35 |
| Russian Federation | G2197     | 1              | 1.00 | 1.00 | 0.99 | 0.98 | 0.97 | 0.95 | 0.92 | 0.89  | 0.86 | 0.83 | 0.78  | 0.69  | 0.61  | 0.55  | 0.51  | 0.45 | 0.41 |
| Russian Federation | G2198     | 1              | 1.00 | 1.00 | 0.98 | 0.97 | 0.94 | 0.91 | 0.88 | 0.86  | 0.83 | 0.81 | 0.78  | 0.74  | 0.72  | 0.69  | 0.67  | 0.60 | 0.50 |
| Russian Federation | G2199     | 1              | 0.95 | 0.82 | 0.67 | 0.57 | 0.52 | 0.48 | 0.44 | 0.43  | 0.41 | 0.40 | 0.36  | 0.35  | 0.35  | 0.34  | 0.30  | 0.26 | 0.23 |
| Russian Federation | G2200     | 1              | 1.00 | 1.00 | 0.99 | 0.98 | 0.96 | 0.93 | 0.89 | 0.84  | 0.77 | 0.71 | 0.58  | 0.47  | 0.41  | 0.38  | 0.35  | 0.30 | 0.25 |
| Russian Federation | G2201     | 1              | 1.00 | 0.99 | 0.95 | 0.87 | 0.73 | 0.61 | 0.50 | 0.39  | 0.32 | 0.28 | 0.26  | 0.28  | 0.27  | 0.27  | 0.29  | 0.25 | 0.26 |
| Russian Federation | G2202     | 1              | 1.00 | 0.99 | 0.97 | 0.95 | 0.92 | 0.89 | 0.86 | 0.81  | 0.75 | 0.71 | 0.65  | 0.59  | 0.53  | 0.48  | 0.45  | 0.41 | 0.41 |
| Russian Federation | G2203     | 1              | 0.99 | 0.97 | 0.93 | 0.89 | 0.85 | 0.81 | 0.76 | 0.71  | 0.68 | 0.63 | 0.53  | 0.46  | 0.43  | 0.39  | 0.35  | 0.32 | 0.29 |
| Russian Federation | G2204     | 1              | 1.00 | 0.98 | 0.96 | 0.94 | 0.93 | 0.91 | 0.90 | 0.88  | 0.85 | 0.81 | 0.76  | 0.67  | 0.58  | 0.52  | 0.49  | 0.40 | 0.34 |
| Russian Federation | G2205     | 1              | 0.99 | 0.96 | 0.91 | 0.86 | 0.81 | 0.74 | 0.69 | 0.65  | 0.58 | 0.50 | 0.45  | 0.40  | 0.39  | 0.38  | 0.37  | 0.35 | 0.34 |
| Russian Federation | G2206     | 1              | 0.99 | 0.97 | 0.94 | 0.90 | 0.86 | 0.82 | 0.78 | 0.73  | 0.70 | 0.64 | 0.53  | 0.49  | 0.45  | 0.44  | 0.42  | 0.38 | 0.37 |
| Russian Federation | G2207     | 1              | 0.99 | 0.95 | 0.90 | 0.79 | 0.68 | 0.62 | 0.59 | 0.55  | 0.47 | 0.43 | 0.41  | 0.35  | 0.31  | 0.32  | 0.29  | 0.28 | 0.26 |
| Russian Federation | G2208     | 1              | 1.00 | 1.00 | 1.00 | 0.99 | 0.98 | 0.96 | 0.94 | 0.91  | 0.88 | 0.84 | 0.74  | 0.62  | 0.53  | 0.47  | 0.43  | 0.35 | 0.29 |
| Russian Federation | G2209     | 1              | 1.00 | 0.98 | 0.97 | 0.96 | 0.96 | 0.95 | 0.93 | 0.91  | 0.87 | 0.83 | 0.77  | 0.68  | 0.59  | 0.53  | 0.48  | 0.39 | 0.33 |
| Russian Federation | G2210     | 1              | 0.98 | 0.88 | 0.73 | 0.59 | 0.51 | 0.46 | 0.43 | 0.40  | 0.34 | 0.25 | 0.22  | 0.26  | 0.25  | 0.24  | 0.24  | 0.23 | 0.21 |
| Russian Federation | G2212     | 1              | 1.00 | 0.99 | 0.97 | 0.95 | 0.93 | 0.92 | 0.91 | 0.90  | 0.89 | 0.89 | 0.88  | 0.87  | 0.86  | 0.85  | 0.84  | 0.80 | 0.75 |
| Russian Federation | G2213     | 1              | 1.00 | 0.99 | 0.98 | 0.95 | 0.93 | 0.91 | 0.90 | 0.89  | 0.88 | 0.86 | 0.83  | 0.77  | 0.69  | 0.60  | 0.55  | 0.49 | 0.42 |
| Russian Federation | G2214     | 1              | 1.00 | 1.00 | 1.00 | 0.98 | 0.96 | 0.92 | 0.87 | 0.80  | 0.73 | 0.65 | 0.50  | 0.38  | 0.33  | 0.30  | 0.29  | 0.24 | 0.21 |
| Russian Federation | G2215     | 1              | 1.00 | 0.99 | 0.97 | 0.93 | 0.87 | 0.81 | 0.75 | 0.69  | 0.63 | 0.56 | 0.47  | 0.39  | 0.37  | 0.37  | 0.34  | 0.27 | 0.28 |
| Russian Federation | G2218     | 1              | 1.00 | 1.00 | 1.00 | 0.99 | 0.99 | 0.98 | 0.97 | 0.95  | 0.94 | 0.92 | 0.86  | 0.79  | 0.71  | 0.64  | 0.56  | 0.37 | 0.22 |
| Russian Federation | G2219     | 1              | 0.96 | 0.86 | 0.67 | 0.42 | 0.29 | 0.25 | 0.22 | 0.19  | 0.18 | 0.17 | 0.13  | 0.10  | 0.11  | 0.14  | 0.12  | 0.11 | 0.11 |
| Russian Federation | G2220     | 1              | 0.99 | 0.94 | 0.85 | 0.68 | 0.51 | 0.41 | 0.38 | 0.33  | 0.28 | 0.25 | 0.16  | 0.10  | 0.09  | 0.10  | 0.09  | 0.07 | 0.06 |
| Russian Federation | G2221     | 1              | 1.00 | 0.99 | 0.98 | 0.97 | 0.94 | 0.92 | 0.89 | 0.86  | 0.84 | 0.82 | 0.78  | 0.75  | 0.72  | 0.70  | 0.67  | 0.60 | 0.50 |
| Russian Federation | G2222     | 1              | 0.99 | 0.95 | 0.84 | 0.70 | 0.59 | 0.50 | 0.44 | 0.40  | 0.39 | 0.38 | 0.34  | 0.32  | 0.30  | 0.29  | 0.26  | 0.20 | 0.18 |
| Russian Federation | G2224     | 1              | 0.99 | 0.92 | 0.72 | 0.52 | 0.43 | 0.40 | 0.38 | 0.36  | 0.37 | 0.38 | 0.37  | 0.36  | 0.34  | 0.31  | 0.28  | 0.22 | 0.21 |
| Russian Federation | G2225     | 1              | 1.00 | 0.99 | 0.95 | 0.88 | 0.80 | 0.74 | 0.69 | 0.66  | 0.64 | 0.62 | 0.56  | 0.55  | 0.52  | 0.49  | 0.46  | 0.38 | 0.33 |
| Russian Federation | G2226     | 1              | 1.00 | 1.00 | 0.99 | 0.97 | 0.93 | 0.88 | 0.83 | 0.78  | 0.73 | 0.70 | 0.65  | 0.61  | 0.59  | 0.57  | 0.54  | 0.47 | 0.38 |
| Russian Federation | G2227     | 1              | 0.94 | 0.78 | 0.55 | 0.40 | 0.37 | 0.34 | 0.28 | 0.21  | 0.19 | 0.18 | 0.08  | 0.06  | 0.08  | 0.09  | 0.09  | 0.06 | 0.08 |
| Russian Federation | G2228     | 1              | 0.99 | 0.95 | 0.88 | 0.74 | 0.57 | 0.49 | 0.46 | 0.40  | 0.33 | 0.29 | 0.20  | 0.13  | 0.11  | 0.13  | 0.10  | 0.09 | 0.07 |
| Russian Federation | G2229     | 1              | 1.00 | 1.00 | 0.99 | 0.97 | 0.95 | 0.92 | 0.89 | 0.87  | 0.84 | 0.82 | 0.79  | 0.76  | 0.73  | 0.70  | 0.68  | 0.61 | 0.50 |
| Russian Federation | G2230     | 1              | 0.99 | 0.84 | 0.50 | 0.29 | 0.16 | 0.10 | 0.04 | -0.01 | 0.00 | 0.01 | -0.04 | -0.04 | -0.03 | -0.04 | -0.03 | 0.02 | 0.03 |
| Russian Federation | G2231     | 1              | 1.00 | 1.00 | 0.99 | 0.99 | 0.98 | 0.97 | 0.96 | 0.95  | 0.94 | 0.92 | 0.89  | 0.82  | 0.73  | 0.65  | 0.60  | 0.53 | 0.45 |

| Country            | GloFAS ID | Station filter | LT1  | LT2  | LT3  | LT4  | LT5  | LT6  | LT7   | LT8   | LT9   | LT10 | LT12 | LT14 | LT16 | LT18  | LT20  | LT25  | L30   |
|--------------------|-----------|----------------|------|------|------|------|------|------|-------|-------|-------|------|------|------|------|-------|-------|-------|-------|
| Russian Federation | G2232     | 1              | 1.00 | 1.00 | 0.99 | 0.97 | 0.95 | 0.91 | 0.86  | 0.81  | 0.76  | 0.71 | 0.61 | 0.53 | 0.48 | 0.44  | 0.41  | 0.36  | 0.33  |
| Russian Federation | G2233     | 1              | 1.00 | 1.00 | 0.99 | 0.96 | 0.92 | 0.87 | 0.82  | 0.77  | 0.72  | 0.69 | 0.65 | 0.61 | 0.59 | 0.57  | 0.54  | 0.47  | 0.39  |
| Russian Federation | G2234     | 1              | 0.95 | 0.85 | 0.72 | 0.60 | 0.52 | 0.46 | 0.41  | 0.34  | 0.29  | 0.25 | 0.17 | 0.15 | 0.14 | 0.15  | 0.14  | 0.10  | 0.10  |
| Russian Federation | G2235     | 1              | 1.00 | 0.99 | 0.96 | 0.88 | 0.75 | 0.62 | 0.51  | 0.41  | 0.35  | 0.31 | 0.25 | 0.23 | 0.24 | 0.23  | 0.22  | 0.17  | 0.16  |
| Russian Federation | G2236     | 1              | 1.00 | 0.99 | 0.98 | 0.97 | 0.95 | 0.91 | 0.87  | 0.82  | 0.76  | 0.70 | 0.58 | 0.48 | 0.43 | 0.40  | 0.37  | 0.31  | 0.25  |
| Russian Federation | G2237     | 1              | 1.00 | 1.00 | 0.99 | 0.98 | 0.96 | 0.92 | 0.88  | 0.84  | 0.79  | 0.73 | 0.61 | 0.51 | 0.45 | 0.42  | 0.39  | 0.32  | 0.27  |
| Russian Federation | G2238     | 1              | 0.97 | 0.80 | 0.49 | 0.25 | 0.10 | 0.02 | -0.01 | -0.02 | -0.02 | 0.00 | 0.04 | 0.07 | 0.03 | -0.04 | -0.04 | -0.15 | -0.24 |
| Russian Federation | G2239     | 1              | 1.00 | 1.00 | 0.99 | 0.98 | 0.95 | 0.90 | 0.85  | 0.78  | 0.69  | 0.59 | 0.44 | 0.36 | 0.32 | 0.31  | 0.30  | 0.24  | 0.22  |
| Russian Federation | G2240     | 1              | 1.00 | 0.97 | 0.92 | 0.85 | 0.78 | 0.72 | 0.67  | 0.63  | 0.58  | 0.54 | 0.47 | 0.42 | 0.39 | 0.36  | 0.34  | 0.27  | 0.23  |
| Russian Federation | G2242     | 1              | 1.00 | 1.00 | 0.99 | 0.97 | 0.95 | 0.92 | 0.89  | 0.86  | 0.84  | 0.82 | 0.79 | 0.76 | 0.73 | 0.70  | 0.68  | 0.60  | 0.50  |
| Russian Federation | G2243     | 1              | 0.99 | 0.92 | 0.84 | 0.74 | 0.65 | 0.58 | 0.52  | 0.47  | 0.44  | 0.44 | 0.39 | 0.35 | 0.34 | 0.32  | 0.28  | 0.25  | 0.23  |
| Russian Federation | G2244     | 1              | 1.00 | 1.00 | 1.00 | 1.00 | 0.99 | 0.99 | 0.99  | 0.98  | 0.97  | 0.96 | 0.93 | 0.88 | 0.83 | 0.77  | 0.68  | 0.46  | 0.33  |
| Russian Federation | G2247     | 1              | 1.00 | 1.00 | 0.98 | 0.95 | 0.90 | 0.85 | 0.79  | 0.75  | 0.71  | 0.68 | 0.64 | 0.60 | 0.58 | 0.56  | 0.52  | 0.45  | 0.37  |
| Russian Federation | G2248     | 1              | 1.00 | 0.99 | 0.96 | 0.91 | 0.84 | 0.76 | 0.69  | 0.63  | 0.56  | 0.50 | 0.39 | 0.34 | 0.32 | 0.31  | 0.28  | 0.24  | 0.23  |
| Russian Federation | G2249     | 1              | 1.00 | 0.98 | 0.95 | 0.89 | 0.82 | 0.76 | 0.70  | 0.64  | 0.60  | 0.58 | 0.47 | 0.45 | 0.43 | 0.39  | 0.38  | 0.35  | 0.33  |
| Russian Federation | G2252     | 1              | 0.99 | 0.96 | 0.92 | 0.87 | 0.79 | 0.71 | 0.64  | 0.59  | 0.55  | 0.53 | 0.49 | 0.47 | 0.45 | 0.43  | 0.37  | 0.26  | 0.16  |
| Russian Federation | G2256     | 1              | 0.98 | 0.91 | 0.77 | 0.61 | 0.48 | 0.40 | 0.36  | 0.33  | 0.30  | 0.28 | 0.26 | 0.24 | 0.20 | 0.09  | 0.02  | -0.12 | -0.19 |
| Russian Federation | G2257     | 1              | 1.00 | 0.97 | 0.93 | 0.88 | 0.83 | 0.78 | 0.74  | 0.70  | 0.66  | 0.63 | 0.58 | 0.55 | 0.54 | 0.52  | 0.51  | 0.48  | 0.45  |
| Russian Federation | G2258     | 1              | 1.00 | 0.98 | 0.91 | 0.82 | 0.76 | 0.70 | 0.67  | 0.64  | 0.62  | 0.59 | 0.56 | 0.56 | 0.55 | 0.54  | 0.54  | 0.52  | 0.51  |
| Russian Federation | G2259     | 1              | 0.99 | 0.97 | 0.91 | 0.85 | 0.79 | 0.74 | 0.67  | 0.62  | 0.60  | 0.56 | 0.47 | 0.46 | 0.44 | 0.40  | 0.40  | 0.37  | 0.35  |
| Russian Federation | G2262     | 1              | 0.94 | 0.79 | 0.62 | 0.51 | 0.41 | 0.30 | 0.27  | 0.24  | 0.20  | 0.17 | 0.14 | 0.12 | 0.13 | 0.12  | 0.09  | 0.09  | 0.07  |
| Russian Federation | G2263     | 1              | 1.00 | 0.99 | 0.98 | 0.97 | 0.94 | 0.91 | 0.88  | 0.86  | 0.84  | 0.82 | 0.79 | 0.75 | 0.72 | 0.70  | 0.68  | 0.60  | 0.49  |
| Russian Federation | G2264     | 1              | 0.99 | 0.90 | 0.77 | 0.65 | 0.54 | 0.46 | 0.40  | 0.38  | 0.36  | 0.34 | 0.31 | 0.29 | 0.28 | 0.28  | 0.24  | 0.19  | 0.15  |
| Russian Federation | G2265     | 1              | 1.00 | 0.95 | 0.85 | 0.67 | 0.44 | 0.28 | 0.21  | 0.16  | 0.14  | 0.13 | 0.13 | 0.12 | 0.14 | 0.10  | 0.09  | 0.08  | 0.06  |
| Russian Federation | G2271     | 1              | 0.99 | 0.94 | 0.77 | 0.59 | 0.45 | 0.36 | 0.34  | 0.35  | 0.36  | 0.35 | 0.36 | 0.38 | 0.36 | 0.30  | 0.24  | -0.01 | -0.04 |
| Russian Federation | G2272     | 1              | 0.99 | 0.96 | 0.85 | 0.67 | 0.53 | 0.46 | 0.41  | 0.38  | 0.36  | 0.34 | 0.31 | 0.27 | 0.24 | 0.16  | 0.08  | -0.03 | -0.10 |
| Russian Federation | G2273     | 1              | 1.00 | 0.98 | 0.95 | 0.89 | 0.81 | 0.73 | 0.66  | 0.61  | 0.58  | 0.54 | 0.47 | 0.43 | 0.42 | 0.41  | 0.41  | 0.41  | 0.41  |
| Russian Federation | G2274     | 1              | 1.00 | 1.00 | 0.99 | 0.97 | 0.95 | 0.93 | 0.90  | 0.87  | 0.85  | 0.83 | 0.80 | 0.76 | 0.73 | 0.71  | 0.68  | 0.61  | 0.50  |
| Russian Federation | G2275     | 1              | 1.00 | 0.99 | 0.97 | 0.93 | 0.87 | 0.79 | 0.68  | 0.56  | 0.46  | 0.38 | 0.30 | 0.28 | 0.29 | 0.29  | 0.28  | 0.23  | 0.23  |
| Russian Federation | G2276     | 1              | 0.99 | 0.94 | 0.86 | 0.76 | 0.68 | 0.61 | 0.57  | 0.56  | 0.52  | 0.47 | 0.45 | 0.43 | 0.39 | 0.35  | 0.34  | 0.33  | 0.30  |
| Russian Federation | G2282     | 1              | 1.00 | 1.00 | 0.99 | 0.97 | 0.96 | 0.94 | 0.93  | 0.92  | 0.91  | 0.89 | 0.84 | 0.78 | 0.72 | 0.65  | 0.59  | 0.42  | 0.28  |
| Russian Federation | G2283     | 1              | 1.00 | 0.99 | 0.96 | 0.91 | 0.84 | 0.79 | 0.74  | 0.71  | 0.68  | 0.65 | 0.59 | 0.55 | 0.54 | 0.50  | 0.47  | 0.38  | 0.30  |
| Russian Federation | G2284     | 1              | 0.98 | 0.90 | 0.76 | 0.67 | 0.64 | 0.63 | 0.61  | 0.55  | 0.51  | 0.48 | 0.43 | 0.41 | 0.40 | 0.37  | 0.36  | 0.36  | 0.33  |
| Russian Federation | G2285     | 1              | 0.99 | 0.93 | 0.82 | 0.70 | 0.60 | 0.54 | 0.48  | 0.44  | 0.39  | 0.36 | 0.34 | 0.30 | 0.27 | 0.22  | 0.19  | 0.12  | 0.10  |
| Russian Federation | G2286     | 1              | 1.00 | 0.99 | 0.95 | 0.89 | 0.81 | 0.72 | 0.67  | 0.65  | 0.62  | 0.58 | 0.46 | 0.38 | 0.33 | 0.30  | 0.27  | 0.24  | 0.21  |
| Russian Federation | G2289     | 1              | 1.00 | 1.00 | 0.99 | 0.98 | 0.97 | 0.96 | 0.96  | 0.95  | 0.93  | 0.91 | 0.85 | 0.78 | 0.72 | 0.65  | 0.59  | 0.44  | 0.30  |
| Russian Federation | G2290     | 1              | 0.94 | 0.74 | 0.51 | 0.37 | 0.28 | 0.22 | 0.17  | 0.14  | 0.11  | 0.10 | 0.11 | 0.10 | 0.03 | -0.08 | -0.13 | -0.25 | -0.34 |
| Russian Federation | G2291     | 1              | 1.00 | 0.98 | 0.94 | 0.89 | 0.84 | 0.78 | 0.71  | 0.64  | 0.58  | 0.52 | 0.43 | 0.39 | 0.38 | 0.36  | 0.33  | 0.26  | 0.21  |
| Russian Federation | G2292     | 1              | 1.00 | 1.00 | 0.99 | 0.99 | 0.98 | 0.97 | 0.95  | 0.93  | 0.91  | 0.88 | 0.83 | 0.78 | 0.69 | 0.58  | 0.49  | 0.34  | 0.22  |

| Country            | GloFAS ID | Station filter | LT1  | LT2  | LT3  | LT4  | LT5  | LT6  | LT7  | LT8  | LT9  | LT10 | LT12 | LT14 | LT16 | LT18 | LT20 | LT25  | L30   |
|--------------------|-----------|----------------|------|------|------|------|------|------|------|------|------|------|------|------|------|------|------|-------|-------|
| Russian Federation | G2293     | 1              | 0.96 | 0.85 | 0.72 | 0.61 | 0.51 | 0.46 | 0.45 | 0.40 | 0.31 | 0.24 | 0.24 | 0.21 | 0.18 | 0.17 | 0.19 | 0.19  | 0.19  |
| Russian Federation | G2296     | 1              | 0.99 | 0.95 | 0.87 | 0.80 | 0.75 | 0.71 | 0.68 | 0.66 | 0.63 | 0.61 | 0.57 | 0.56 | 0.54 | 0.51 | 0.49 | 0.43  | 0.37  |
| Russian Federation | G2297     | 1              | 0.99 | 0.95 | 0.87 | 0.79 | 0.73 | 0.68 | 0.64 | 0.60 | 0.58 | 0.55 | 0.49 | 0.46 | 0.42 | 0.39 | 0.37 | 0.41  | 0.39  |
| Russian Federation | G2298     | 1              | 1.00 | 0.99 | 0.98 | 0.95 | 0.90 | 0.85 | 0.81 | 0.76 | 0.70 | 0.65 | 0.55 | 0.48 | 0.43 | 0.41 | 0.37 | 0.29  | 0.29  |
| Russian Federation | G2301     | 1              | 0.99 | 0.99 | 0.97 | 0.94 | 0.89 | 0.82 | 0.75 | 0.70 | 0.65 | 0.60 | 0.51 | 0.45 | 0.39 | 0.35 | 0.32 | 0.35  | 0.41  |
| Russian Federation | G2302     | 1              | 1.00 | 0.98 | 0.94 | 0.86 | 0.75 | 0.61 | 0.48 | 0.38 | 0.31 | 0.29 | 0.29 | 0.31 | 0.32 | 0.31 | 0.28 | 0.24  | 0.24  |
| Russian Federation | G2303     | 1              | 0.99 | 0.95 | 0.86 | 0.73 | 0.60 | 0.48 | 0.38 | 0.32 | 0.29 | 0.27 | 0.24 | 0.23 | 0.22 | 0.21 | 0.18 | 0.16  | 0.16  |
| Russian Federation | G2304     | 1              | 1.00 | 1.00 | 1.00 | 0.99 | 0.98 | 0.97 | 0.95 | 0.93 | 0.91 | 0.88 | 0.83 | 0.77 | 0.67 | 0.56 | 0.48 | 0.33  | 0.21  |
| Russian Federation | G2305     | 1              | 0.99 | 0.92 | 0.83 | 0.74 | 0.67 | 0.63 | 0.59 | 0.56 | 0.54 | 0.51 | 0.49 | 0.48 | 0.45 | 0.41 | 0.40 | 0.36  | 0.32  |
| Russian Federation | G2306     | 1              | 1.00 | 0.98 | 0.95 | 0.89 | 0.84 | 0.78 | 0.72 | 0.66 | 0.61 | 0.56 | 0.50 | 0.45 | 0.43 | 0.39 | 0.35 | 0.28  | 0.30  |
| Russian Federation | G2313     | 1              | 1.00 | 1.00 | 1.00 | 1.00 | 0.99 | 0.99 | 0.99 | 0.98 | 0.97 | 0.96 | 0.93 | 0.90 | 0.87 | 0.82 | 0.77 | 0.61  | 0.41  |
| Russian Federation | G2314     | 1              | 1.00 | 0.97 | 0.89 | 0.78 | 0.68 | 0.58 | 0.44 | 0.34 | 0.30 | 0.29 | 0.29 | 0.28 | 0.31 | 0.30 | 0.27 | 0.24  | 0.24  |
| Russian Federation | G2315     | 1              | 0.98 | 0.92 | 0.83 | 0.72 | 0.62 | 0.56 | 0.52 | 0.50 | 0.47 | 0.41 | 0.36 | 0.32 | 0.26 | 0.22 | 0.23 | 0.25  | 0.21  |
| Russian Federation | G2326     | 1              | 1.00 | 0.99 | 0.97 | 0.95 | 0.94 | 0.93 | 0.92 | 0.90 | 0.87 | 0.84 | 0.77 | 0.69 | 0.62 | 0.56 | 0.51 | 0.39  | 0.26  |
| Russian Federation | G2327     | 1              | 1.00 | 0.97 | 0.90 | 0.79 | 0.65 | 0.52 | 0.41 | 0.34 | 0.30 | 0.30 | 0.31 | 0.32 | 0.31 | 0.29 | 0.26 | 0.23  | 0.22  |
| Russian Federation | G2328     | 1              | 1.00 | 1.00 | 1.00 | 0.99 | 0.98 | 0.96 | 0.94 | 0.91 | 0.88 | 0.86 | 0.80 | 0.72 | 0.61 | 0.52 | 0.44 | 0.31  | 0.19  |
| Russian Federation | G2329     | 1              | 1.00 | 0.99 | 0.98 | 0.96 | 0.92 | 0.86 | 0.80 | 0.72 | 0.65 | 0.59 | 0.48 | 0.43 | 0.38 | 0.34 | 0.29 | 0.19  | 0.16  |
| Russian Federation | G2330     | 1              | 0.99 | 0.95 | 0.88 | 0.81 | 0.76 | 0.72 | 0.68 | 0.65 | 0.62 | 0.60 | 0.55 | 0.52 | 0.50 | 0.44 | 0.44 | 0.42  | 0.40  |
| Russian Federation | G2331     | 1              | 0.99 | 0.94 | 0.87 | 0.78 | 0.71 | 0.66 | 0.60 | 0.55 | 0.51 | 0.48 | 0.42 | 0.38 | 0.34 | 0.28 | 0.25 | 0.25  | 0.27  |
| Russian Federation | G2340     | 1              | 0.96 | 0.83 | 0.70 | 0.59 | 0.51 | 0.45 | 0.41 | 0.39 | 0.36 | 0.33 | 0.31 | 0.32 | 0.29 | 0.26 | 0.25 | 0.24  | 0.23  |
| Russian Federation | G2341     | 1              | 1.00 | 0.99 | 0.98 | 0.95 | 0.91 | 0.86 | 0.80 | 0.73 | 0.67 | 0.63 | 0.56 | 0.52 | 0.48 | 0.45 | 0.39 | 0.33  | 0.31  |
| Russian Federation | G2349     | 1              | 1.00 | 1.00 | 0.99 | 0.98 | 0.95 | 0.93 | 0.90 | 0.87 | 0.86 | 0.84 | 0.80 | 0.77 | 0.74 | 0.71 | 0.68 | 0.60  | 0.49  |
| Russian Federation | G2350     | 1              | 0.99 | 0.92 | 0.78 | 0.61 | 0.47 | 0.39 | 0.34 | 0.30 | 0.28 | 0.29 | 0.29 | 0.31 | 0.30 | 0.29 | 0.27 | 0.21  | 0.19  |
| Russian Federation | G2351     | 1              | 0.99 | 0.93 | 0.84 | 0.74 | 0.65 | 0.57 | 0.50 | 0.44 | 0.40 | 0.37 | 0.34 | 0.32 | 0.31 | 0.28 | 0.27 | 0.23  | 0.19  |
| Russian Federation | G2352     | 1              | 1.00 | 0.99 | 0.98 | 0.95 | 0.90 | 0.84 | 0.77 | 0.68 | 0.61 | 0.55 | 0.45 | 0.39 | 0.34 | 0.29 | 0.25 | 0.14  | 0.11  |
| Russian Federation | G2353     | 1              | 0.99 | 0.95 | 0.89 | 0.83 | 0.78 | 0.75 | 0.71 | 0.68 | 0.65 | 0.62 | 0.59 | 0.55 | 0.52 | 0.48 | 0.44 | 0.39  | 0.40  |
| Russian Federation | G2354     | 1              | 1.00 | 0.97 | 0.90 | 0.83 | 0.77 | 0.72 | 0.68 | 0.64 | 0.60 | 0.57 | 0.52 | 0.49 | 0.46 | 0.40 | 0.37 | 0.36  | 0.35  |
| Russian Federation | G2360     | 1              | 1.00 | 1.00 | 1.00 | 0.99 | 0.99 | 0.98 | 0.97 | 0.96 | 0.95 | 0.93 | 0.90 | 0.85 | 0.80 | 0.75 | 0.68 | 0.49  | 0.27  |
| Russian Federation | G2361     | 1              | 1.00 | 0.98 | 0.94 | 0.90 | 0.86 | 0.80 | 0.73 | 0.65 | 0.59 | 0.52 | 0.43 | 0.40 | 0.39 | 0.37 | 0.35 | 0.25  | 0.20  |
| Russian Federation | G2362     | 1              | 1.00 | 0.99 | 0.98 | 0.96 | 0.92 | 0.86 | 0.81 | 0.75 | 0.70 | 0.67 | 0.59 | 0.53 | 0.49 | 0.47 | 0.44 | 0.39  | 0.34  |
| Russian Federation | G2371     | 1              | 0.99 | 0.97 | 0.90 | 0.81 | 0.69 | 0.58 | 0.48 | 0.43 | 0.41 | 0.40 | 0.38 | 0.35 | 0.34 | 0.29 | 0.25 | 0.24  | 0.23  |
| Russian Federation | G2372     | 1              | 0.99 | 0.94 | 0.82 | 0.63 | 0.45 | 0.34 | 0.26 | 0.23 | 0.22 | 0.21 | 0.24 | 0.25 | 0.27 | 0.25 | 0.23 | 0.19  | 0.21  |
| Russian Federation | G2373     | 1              | 1.00 | 1.00 | 0.98 | 0.96 | 0.94 | 0.91 | 0.89 | 0.86 | 0.84 | 0.81 | 0.73 | 0.62 | 0.52 | 0.44 | 0.37 | 0.24  | 0.13  |
| Russian Federation | G2379     | 1              | 1.00 | 0.98 | 0.94 | 0.87 | 0.80 | 0.73 | 0.67 | 0.62 | 0.58 | 0.55 | 0.50 | 0.47 | 0.45 | 0.43 | 0.40 | 0.34  | 0.30  |
| Russian Federation | G2380     | 1              | 1.00 | 1.00 | 1.00 | 0.99 | 0.99 | 0.98 | 0.98 | 0.97 | 0.95 | 0.94 | 0.90 | 0.86 | 0.80 | 0.74 | 0.68 | 0.49  | 0.26  |
| Russian Federation | G2381     | 1              | 1.00 | 0.98 | 0.95 | 0.89 | 0.81 | 0.71 | 0.62 | 0.53 | 0.45 | 0.38 | 0.27 | 0.20 | 0.15 | 0.11 | 0.07 | -0.02 | -0.10 |
| Russian Federation | G2382     | 1              | 0.99 | 0.93 | 0.83 | 0.74 | 0.68 | 0.64 | 0.60 | 0.56 | 0.53 | 0.51 | 0.48 | 0.44 | 0.42 | 0.39 | 0.36 | 0.28  | 0.29  |
| Russian Federation | G2383     | 1              | 1.00 | 0.99 | 0.94 | 0.87 | 0.79 | 0.74 | 0.71 | 0.68 | 0.64 | 0.60 | 0.56 | 0.54 | 0.51 | 0.49 | 0.47 | 0.40  | 0.38  |
| Russian Federation | G2384     | 1              | 0.98 | 0.94 | 0.86 | 0.77 | 0.68 | 0.59 | 0.52 | 0.46 | 0.42 | 0.38 | 0.34 | 0.32 | 0.30 | 0.28 | 0.26 | 0.20  | 0.15  |



| Country            | GloFAS ID | Station filter | LT1  | LT2  | LT3  | LT4  | LT5  | LT6  | LT7  | LT8  | LT9  | LT10 | LT12 | LT14 | LT16  | LT18  | LT20  | LT25  | L30   |
|--------------------|-----------|----------------|------|------|------|------|------|------|------|------|------|------|------|------|-------|-------|-------|-------|-------|
| Russian Federation | G2392     | 1              | 1.00 | 1.00 | 0.99 | 0.98 | 0.96 | 0.94 | 0.91 | 0.87 | 0.83 | 0.77 | 0.65 | 0.53 | 0.42  | 0.34  | 0.26  | 0.10  | 0.03  |
| Russian Federation | G2393     | 1              | 0.99 | 0.95 | 0.87 | 0.78 | 0.71 | 0.65 | 0.59 | 0.54 | 0.49 | 0.46 | 0.41 | 0.38 | 0.35  | 0.28  | 0.14  | -0.14 | -0.20 |
| Russian Federation | G2394     | 1              | 0.99 | 0.97 | 0.94 | 0.91 | 0.86 | 0.82 | 0.78 | 0.74 | 0.70 | 0.67 | 0.62 | 0.58 | 0.55  | 0.51  | 0.49  | 0.43  | 0.38  |
| Russian Federation | G2395     | 1              | 1.00 | 1.00 | 0.99 | 0.99 | 0.98 | 0.95 | 0.92 | 0.89 | 0.86 | 0.82 | 0.76 | 0.69 | 0.63  | 0.57  | 0.52  | 0.37  | 0.27  |
| Russian Federation | G2396     | 1              | 0.98 | 0.87 | 0.69 | 0.51 | 0.43 | 0.41 | 0.39 | 0.35 | 0.34 | 0.35 | 0.30 | 0.29 | 0.27  | 0.27  | 0.27  | 0.26  | 0.23  |
| Russian Federation | G2397     | 1              | 0.93 | 0.76 | 0.59 | 0.48 | 0.40 | 0.35 | 0.30 | 0.27 | 0.26 | 0.25 | 0.26 | 0.25 | 0.26  | 0.24  | 0.23  | 0.20  | 0.20  |
| Russian Federation | G2398     | 1              | 0.96 | 0.85 | 0.74 | 0.69 | 0.64 | 0.59 | 0.56 | 0.53 | 0.51 | 0.47 | 0.46 | 0.43 | 0.40  | 0.37  | 0.34  | 0.33  | 0.34  |
| Russian Federation | G2404     | 1              | 1.00 | 1.00 | 0.99 | 0.98 | 0.93 | 0.82 | 0.68 | 0.56 | 0.46 | 0.39 | 0.27 | 0.18 | 0.13  | 0.09  | 0.02  | -0.12 | -0.11 |
| Russian Federation | G2405     | 1              | 0.97 | 0.76 | 0.41 | 0.25 | 0.21 | 0.22 | 0.25 | 0.28 | 0.32 | 0.33 | 0.35 | 0.36 | 0.37  | 0.35  | 0.36  | 0.34  | 0.34  |
| Russian Federation | G2406     | 1              | 0.99 | 0.95 | 0.87 | 0.76 | 0.67 | 0.61 | 0.57 | 0.53 | 0.48 | 0.45 | 0.41 | 0.39 | 0.35  | 0.29  | 0.23  | 0.16  | 0.15  |
| Russian Federation | G2410     | 1              | 0.99 | 0.95 | 0.86 | 0.75 | 0.66 | 0.59 | 0.53 | 0.48 | 0.43 | 0.39 | 0.34 | 0.31 | 0.28  | 0.26  | 0.20  | 0.09  | 0.03  |
| Russian Federation | G2411     | 1              | 1.00 | 1.00 | 0.99 | 0.98 | 0.96 | 0.94 | 0.91 | 0.87 | 0.81 | 0.75 | 0.62 | 0.50 | 0.40  | 0.31  | 0.24  | 0.10  | 0.05  |
| Russian Federation | G2412     | 1              | 1.00 | 1.00 | 0.99 | 0.99 | 0.98 | 0.97 | 0.95 | 0.93 | 0.91 | 0.89 | 0.84 | 0.78 | 0.72  | 0.66  | 0.61  | 0.48  | 0.36  |
| Russian Federation | G2413     | 1              | 1.00 | 0.99 | 0.97 | 0.95 | 0.93 | 0.91 | 0.89 | 0.87 | 0.84 | 0.81 | 0.74 | 0.67 | 0.61  | 0.53  | 0.47  | 0.32  | 0.18  |
| Russian Federation | G2414     | 1              | 0.97 | 0.83 | 0.68 | 0.58 | 0.50 | 0.45 | 0.40 | 0.35 | 0.34 | 0.32 | 0.30 | 0.28 | 0.27  | 0.23  | 0.22  | 0.19  | 0.19  |
| Russian Federation | G2415     | 1              | 1.00 | 0.96 | 0.88 | 0.78 | 0.71 | 0.63 | 0.56 | 0.52 | 0.49 | 0.46 | 0.40 | 0.36 | 0.35  | 0.32  | 0.33  | 0.30  | 0.25  |
| Russian Federation | G2416     | 1              | 1.00 | 0.99 | 0.98 | 0.96 | 0.93 | 0.91 | 0.89 | 0.87 | 0.84 | 0.81 | 0.71 | 0.60 | 0.50  | 0.42  | 0.36  | 0.23  | 0.11  |
| Russian Federation | G2417     | 1              | 1.00 | 1.00 | 0.99 | 0.98 | 0.97 | 0.96 | 0.95 | 0.93 | 0.90 | 0.86 | 0.75 | 0.62 | 0.50  | 0.41  | 0.35  | 0.21  | 0.08  |
| Russian Federation | G2423     | 1              | 1.00 | 1.00 | 0.99 | 0.98 | 0.96 | 0.94 | 0.92 | 0.89 | 0.86 | 0.83 | 0.76 | 0.68 | 0.61  | 0.53  | 0.46  | 0.30  | 0.20  |
| Russian Federation | G2424     | 1              | 0.94 | 0.71 | 0.47 | 0.35 | 0.27 | 0.19 | 0.14 | 0.11 | 0.07 | 0.03 | 0.05 | 0.03 | -0.03 | -0.10 | -0.15 | -0.28 | -0.40 |
| Russian Federation | G2425     | 1              | 0.99 | 0.98 | 0.95 | 0.92 | 0.88 | 0.80 | 0.72 | 0.65 | 0.58 | 0.51 | 0.43 | 0.41 | 0.40  | 0.37  | 0.35  | 0.24  | 0.19  |
| Russian Federation | G2426     | 1              | 1.00 | 0.98 | 0.93 | 0.86 | 0.78 | 0.71 | 0.64 | 0.58 | 0.54 | 0.51 | 0.45 | 0.42 | 0.40  | 0.36  | 0.34  | 0.31  | 0.27  |
| Russian Federation | G2427     | 1              | 1.00 | 0.98 | 0.94 | 0.87 | 0.80 | 0.73 | 0.68 | 0.65 | 0.62 | 0.60 | 0.55 | 0.53 | 0.51  | 0.49  | 0.45  | 0.38  | 0.34  |
| Russian Federation | G2428     | 1              | 1.00 | 0.99 | 0.98 | 0.95 | 0.88 | 0.79 | 0.69 | 0.61 | 0.55 | 0.49 | 0.42 | 0.37 | 0.32  | 0.29  | 0.24  | 0.13  | 0.11  |
| Russian Federation | G2429     | 1              | 1.00 | 0.97 | 0.93 | 0.87 | 0.82 | 0.77 | 0.74 | 0.70 | 0.66 | 0.62 | 0.58 | 0.54 | 0.50  | 0.45  | 0.40  | 0.38  | 0.38  |
| Russian Federation | G2434     | 1              | 1.00 | 0.97 | 0.93 | 0.86 | 0.78 | 0.71 | 0.63 | 0.57 | 0.52 | 0.47 | 0.42 | 0.39 | 0.37  | 0.34  | 0.31  | 0.25  | 0.21  |
| Russian Federation | G2435     | 1              | 1.00 | 1.00 | 0.99 | 0.99 | 0.98 | 0.97 | 0.95 | 0.93 | 0.91 | 0.89 | 0.84 | 0.77 | 0.71  | 0.65  | 0.60  | 0.46  | 0.34  |
| Russian Federation | G2436     | 1              | 1.00 | 0.99 | 0.98 | 0.97 | 0.95 | 0.93 | 0.90 | 0.87 | 0.84 | 0.80 | 0.74 | 0.69 | 0.65  | 0.61  | 0.58  | 0.52  | 0.46  |
| Russian Federation | G2437     | 1              | 1.00 | 0.99 | 0.98 | 0.97 | 0.96 | 0.94 | 0.91 | 0.88 | 0.85 | 0.81 | 0.74 | 0.67 | 0.60  | 0.53  | 0.48  | 0.34  | 0.20  |
| Russian Federation | G2438     | 1              | 0.99 | 0.93 | 0.81 | 0.66 | 0.58 | 0.53 | 0.48 | 0.44 | 0.42 | 0.41 | 0.38 | 0.34 | 0.30  | 0.22  | 0.20  | 0.22  | 0.22  |
| Russian Federation | G2439     | 1              | 1.00 | 1.00 | 0.99 | 0.98 | 0.97 | 0.94 | 0.91 | 0.88 | 0.84 | 0.79 | 0.73 | 0.67 | 0.61  | 0.56  | 0.52  | 0.40  | 0.35  |
| Russian Federation | G2443     | 1              | 0.99 | 0.97 | 0.90 | 0.78 | 0.68 | 0.62 | 0.58 | 0.55 | 0.53 | 0.50 | 0.48 | 0.45 | 0.44  | 0.40  | 0.37  | 0.27  | 0.21  |
| Russian Federation | G2444     | 1              | 0.99 | 0.95 | 0.89 | 0.82 | 0.76 | 0.71 | 0.66 | 0.61 | 0.56 | 0.54 | 0.50 | 0.46 | 0.43  | 0.37  | 0.32  | 0.27  | 0.27  |
| Russian Federation | G2451     | 1              | 0.99 | 0.97 | 0.93 | 0.88 | 0.82 | 0.78 | 0.75 | 0.73 | 0.70 | 0.68 | 0.65 | 0.63 | 0.60  | 0.58  | 0.53  | 0.37  | 0.28  |
| Russian Federation | G2452     | 1              | 1.00 | 0.98 | 0.91 | 0.81 | 0.71 | 0.61 | 0.55 | 0.51 | 0.48 | 0.45 | 0.41 | 0.38 | 0.35  | 0.32  | 0.27  | 0.17  | 0.11  |
| Russian Federation | G2453     | 1              | 0.97 | 0.87 | 0.76 | 0.67 | 0.62 | 0.57 | 0.52 | 0.50 | 0.47 | 0.42 | 0.40 | 0.39 | 0.36  | 0.34  | 0.34  | 0.32  | 0.30  |
| Russian Federation | G2454     | 1              | 0.99 | 0.93 | 0.84 | 0.75 | 0.66 | 0.60 | 0.56 | 0.53 | 0.49 | 0.43 | 0.37 | 0.36 | 0.34  | 0.31  | 0.29  | 0.28  | 0.26  |
| Russian Federation | G2455     | 1              | 0.98 | 0.92 | 0.84 | 0.77 | 0.72 | 0.68 | 0.64 | 0.60 | 0.58 | 0.56 | 0.52 | 0.48 | 0.46  | 0.43  | 0.40  | 0.37  | 0.36  |
| Russian Federation | G2456     | 1              | 0.99 | 0.94 | 0.88 | 0.81 | 0.75 | 0.70 | 0.65 | 0.61 | 0.57 | 0.54 | 0.51 | 0.48 | 0.44  | 0.39  | 0.34  | 0.30  | 0.29  |



| Country            | GloFAS ID | Station filter | LT1  | LT2  | LT3  | LT4   | LT5   | LT6   | LT7   | LT8   | LT9   | LT10  | LT12  | LT14 | LT16 | LT18  | LT20  | LT25  | L30   |
|--------------------|-----------|----------------|------|------|------|-------|-------|-------|-------|-------|-------|-------|-------|------|------|-------|-------|-------|-------|
| Russian Federation | G2459     | 1              | 1.00 | 0.99 | 0.96 | 0.92  | 0.86  | 0.78  | 0.69  | 0.61  | 0.54  | 0.47  | 0.37  | 0.30 | 0.27 | 0.26  | 0.26  | 0.26  | 0.22  |
| Russian Federation | G2460     | 1              | 1.00 | 0.99 | 0.97 | 0.94  | 0.89  | 0.82  | 0.74  | 0.68  | 0.62  | 0.57  | 0.48  | 0.43 | 0.40 | 0.39  | 0.38  | 0.33  | 0.24  |
| Russian Federation | G2461     | 1              | 1.00 | 0.98 | 0.93 | 0.83  | 0.72  | 0.64  | 0.58  | 0.54  | 0.52  | 0.49  | 0.47  | 0.44 | 0.42 | 0.38  | 0.34  | 0.22  | 0.16  |
| Russian Federation | G2462     | 1              | 0.98 | 0.90 | 0.77 | 0.68  | 0.62  | 0.56  | 0.51  | 0.47  | 0.46  | 0.43  | 0.40  | 0.39 | 0.38 | 0.34  | 0.32  | 0.28  | 0.26  |
| Russian Federation | G2463     | 1              | 0.99 | 0.91 | 0.72 | 0.47  | 0.26  | 0.17  | 0.15  | 0.16  | 0.17  | 0.20  | 0.23  | 0.25 | 0.25 | 0.25  | 0.25  | 0.24  | 0.23  |
| Russian Federation | G2464     | 1              | 1.00 | 1.00 | 0.99 | 0.98  | 0.98  | 0.96  | 0.94  | 0.91  | 0.87  | 0.82  | 0.70  | 0.56 | 0.45 | 0.38  | 0.33  | 0.19  | 0.07  |
| Russian Federation | G2465     | 1              | 0.99 | 0.95 | 0.87 | 0.79  | 0.73  | 0.69  | 0.65  | 0.62  | 0.59  | 0.57  | 0.54  | 0.49 | 0.46 | 0.41  | 0.36  | 0.32  | 0.30  |
| Russian Federation | G2466     | 1              | 0.99 | 0.92 | 0.84 | 0.77  | 0.73  | 0.70  | 0.66  | 0.64  | 0.63  | 0.61  | 0.58  | 0.53 | 0.48 | 0.46  | 0.42  | 0.36  | 0.35  |
| Russian Federation | G2467     | 1              | 1.00 | 0.99 | 0.96 | 0.91  | 0.86  | 0.80  | 0.76  | 0.72  | 0.69  | 0.65  | 0.61  | 0.56 | 0.52 | 0.46  | 0.42  | 0.35  | 0.35  |
| Russian Federation | G2473     | 1              | 1.00 | 0.98 | 0.94 | 0.87  | 0.78  | 0.67  | 0.57  | 0.46  | 0.37  | 0.28  | 0.16  | 0.08 | 0.04 | 0.03  | 0.05  | 0.14  | 0.21  |
| Russian Federation | G2474     | 1              | 1.00 | 1.00 | 0.99 | 0.99  | 0.98  | 0.97  | 0.95  | 0.93  | 0.91  | 0.88  | 0.82  | 0.75 | 0.69 | 0.63  | 0.58  | 0.43  | 0.33  |
| Russian Federation | G2475     | 1              | 1.00 | 0.98 | 0.93 | 0.88  | 0.82  | 0.77  | 0.72  | 0.67  | 0.63  | 0.60  | 0.54  | 0.50 | 0.47 | 0.42  | 0.37  | 0.26  | 0.21  |
| Russian Federation | G2476     | 1              | 1.00 | 1.00 | 0.99 | 0.98  | 0.97  | 0.95  | 0.93  | 0.90  | 0.87  | 0.83  | 0.75  | 0.67 | 0.60 | 0.52  | 0.45  | 0.30  | 0.20  |
| Russian Federation | G2477     | 1              | 0.98 | 0.85 | 0.66 | 0.53  | 0.44  | 0.38  | 0.33  | 0.30  | 0.26  | 0.24  | 0.24  | 0.24 | 0.23 | 0.20  | 0.17  | 0.09  | 0.05  |
| Russian Federation | G2478     | 1              | 1.00 | 0.99 | 0.96 | 0.91  | 0.85  | 0.78  | 0.72  | 0.65  | 0.58  | 0.52  | 0.43  | 0.36 | 0.32 | 0.28  | 0.25  | 0.22  | 0.24  |
| Russian Federation | G2479     | 1              | 0.98 | 0.89 | 0.73 | 0.56  | 0.43  | 0.34  | 0.27  | 0.22  | 0.18  | 0.15  | 0.12  | 0.15 | 0.13 | 0.02  | -0.04 | -0.05 | -0.01 |
| Russian Federation | G2480     | 1              | 0.99 | 0.95 | 0.88 | 0.79  | 0.71  | 0.64  | 0.59  | 0.54  | 0.51  | 0.46  | 0.39  | 0.37 | 0.36 | 0.32  | 0.30  | 0.28  | 0.27  |
| Russian Federation | G2481     | 1              | 1.00 | 0.99 | 0.97 | 0.93  | 0.87  | 0.80  | 0.75  | 0.70  | 0.66  | 0.61  | 0.54  | 0.49 | 0.46 | 0.41  | 0.35  | 0.26  | 0.25  |
| Russian Federation | G2485     | 1              | 1.00 | 0.99 | 0.97 | 0.94  | 0.90  | 0.84  | 0.78  | 0.71  | 0.63  | 0.57  | 0.45  | 0.36 | 0.31 | 0.25  | 0.14  | -0.45 | -0.89 |
| Russian Federation | G2486     | 1              | 1.00 | 0.99 | 0.95 | 0.90  | 0.84  | 0.77  | 0.72  | 0.67  | 0.63  | 0.59  | 0.52  | 0.47 | 0.42 | 0.38  | 0.33  | 0.23  | 0.18  |
| Russian Federation | G2487     | 1              | 1.00 | 0.97 | 0.92 | 0.85  | 0.79  | 0.71  | 0.64  | 0.59  | 0.56  | 0.53  | 0.51  | 0.50 | 0.48 | 0.47  | 0.46  | 0.40  | 0.38  |
| Russian Federation | G2488     | 1              | 1.00 | 0.98 | 0.92 | 0.80  | 0.65  | 0.51  | 0.41  | 0.36  | 0.34  | 0.33  | 0.35  | 0.36 | 0.37 | 0.36  | 0.35  | 0.32  | 0.31  |
| Russian Federation | G2489     | 1              | 0.97 | 0.81 | 0.26 | -0.28 | -0.48 | -0.48 | -0.41 | -0.33 | -0.25 | -0.16 | -0.01 | 0.08 | 0.15 | 0.17  | 0.19  | 0.20  | 0.18  |
| Russian Federation | G2490     | 1              | 0.99 | 0.95 | 0.86 | 0.75  | 0.64  | 0.53  | 0.41  | 0.30  | 0.22  | 0.17  | 0.12  | 0.08 | 0.07 | 0.07  | 0.07  | 0.04  | 0.04  |
| Russian Federation | G2491     | 1              | 1.00 | 0.99 | 0.98 | 0.96  | 0.93  | 0.91  | 0.88  | 0.86  | 0.85  | 0.83  | 0.79  | 0.76 | 0.73 | 0.71  | 0.68  | 0.59  | 0.47  |
| Russian Federation | G2492     | 1              | 0.97 | 0.85 | 0.68 | 0.50  | 0.37  | 0.31  | 0.28  | 0.25  | 0.25  | 0.27  | 0.26  | 0.26 | 0.24 | 0.24  | 0.20  | 0.13  | 0.12  |
| Russian Federation | G2493     | 1              | 0.99 | 0.94 | 0.86 | 0.79  | 0.73  | 0.68  | 0.64  | 0.61  | 0.59  | 0.57  | 0.53  | 0.52 | 0.49 | 0.47  | 0.46  | 0.38  | 0.33  |
| Russian Federation | G2494     | 1              | 1.00 | 0.97 | 0.89 | 0.79  | 0.70  | 0.65  | 0.63  | 0.60  | 0.56  | 0.53  | 0.50  | 0.49 | 0.45 | 0.41  | 0.37  | 0.32  | 0.29  |
| Russian Federation | G2495     | 1              | 1.00 | 0.98 | 0.95 | 0.89  | 0.79  | 0.68  | 0.62  | 0.58  | 0.53  | 0.48  | 0.43  | 0.38 | 0.36 | 0.30  | 0.22  | 0.19  | 0.18  |
| Russian Federation | G2499     | 1              | 0.99 | 0.98 | 0.95 | 0.90  | 0.83  | 0.76  | 0.70  | 0.64  | 0.59  | 0.55  | 0.49  | 0.46 | 0.44 | 0.40  | 0.38  | 0.31  | 0.25  |
| Russian Federation | G2500     | 1              | 0.99 | 0.98 | 0.95 | 0.91  | 0.84  | 0.78  | 0.72  | 0.67  | 0.63  | 0.58  | 0.52  | 0.48 | 0.46 | 0.44  | 0.43  | 0.37  | 0.30  |
| Russian Federation | G2501     | 1              | 1.00 | 0.97 | 0.90 | 0.80  | 0.68  | 0.56  | 0.48  | 0.41  | 0.35  | 0.30  | 0.23  | 0.19 | 0.18 | 0.17  | 0.13  | 0.00  | -0.08 |
| Russian Federation | G2502     | 1              | 1.00 | 1.00 | 1.00 | 1.00  | 0.99  | 0.98  | 0.97  | 0.96  | 0.94  | 0.91  | 0.86  | 0.79 | 0.73 | 0.67  | 0.63  | 0.53  | 0.47  |
| Russian Federation | G2507     | 1              | 1.00 | 1.00 | 1.00 | 0.99  | 0.99  | 0.98  | 0.97  | 0.95  | 0.94  | 0.92  | 0.88  | 0.83 | 0.77 | 0.71  | 0.64  | 0.44  | 0.21  |
| Russian Federation | G2508     | 1              | 1.00 | 1.00 | 0.99 | 0.98  | 0.97  | 0.95  | 0.93  | 0.90  | 0.86  | 0.83  | 0.75  | 0.67 | 0.60 | 0.52  | 0.45  | 0.30  | 0.20  |
| Russian Federation | G2509     | 1              | 1.00 | 0.98 | 0.92 | 0.84  | 0.74  | 0.65  | 0.59  | 0.54  | 0.52  | 0.50  | 0.46  | 0.44 | 0.41 | 0.39  | 0.33  | 0.23  | 0.17  |
| Russian Federation | G2510     | 1              | 1.00 | 1.00 | 0.99 | 0.97  | 0.94  | 0.92  | 0.89  | 0.88  | 0.86  | 0.84  | 0.80  | 0.77 | 0.74 | 0.71  | 0.68  | 0.59  | 0.47  |
| Russian Federation | G2511     | 1              | 1.00 | 1.00 | 0.99 | 0.97  | 0.94  | 0.92  | 0.90  | 0.88  | 0.86  | 0.84  | 0.80  | 0.77 | 0.74 | 0.71  | 0.68  | 0.59  | 0.47  |
| Russian Federation | G2514     | 1              | 0.99 | 0.97 | 0.93 | 0.87  | 0.78  | 0.67  | 0.56  | 0.47  | 0.39  | 0.30  | 0.16  | 0.06 | 0.00 | -0.06 | -0.12 | -0.10 | -0.04 |

| Country            | GloFAS ID | Station filter | LT1  | LT2  | LT3  | LT4   | LT5   | LT6   | LT7   | LT8   | LT9   | LT10  | LT12  | LT14  | LT16  | LT18  | LT20  | LT25  | L30   |
|--------------------|-----------|----------------|------|------|------|-------|-------|-------|-------|-------|-------|-------|-------|-------|-------|-------|-------|-------|-------|
| Russian Federation | G2515     | 1              | 0.98 | 0.93 | 0.85 | 0.77  | 0.71  | 0.65  | 0.60  | 0.56  | 0.53  | 0.50  | 0.42  | 0.37  | 0.31  | 0.26  | 0.21  | 0.15  | 0.10  |
| Russian Federation | G2516     | 1              | 0.98 | 0.87 | 0.64 | 0.48  | 0.41  | 0.38  | 0.34  | 0.31  | 0.28  | 0.26  | 0.26  | 0.23  | 0.23  | 0.23  | 0.22  | 0.25  | 0.25  |
| Russian Federation | G2517     | 1              | 1.00 | 0.98 | 0.94 | 0.89  | 0.83  | 0.75  | 0.67  | 0.59  | 0.55  | 0.50  | 0.40  | 0.36  | 0.33  | 0.30  | 0.25  | 0.18  | 0.18  |
| Russian Federation | G2519     | 1              | 1.00 | 0.98 | 0.94 | 0.86  | 0.76  | 0.66  | 0.57  | 0.51  | 0.47  | 0.44  | 0.40  | 0.38  | 0.35  | 0.31  | 0.28  | 0.16  | 0.08  |
| Russian Federation | G2520     | 1              | 1.00 | 0.99 | 0.96 | 0.90  | 0.82  | 0.74  | 0.65  | 0.59  | 0.56  | 0.53  | 0.48  | 0.45  | 0.41  | 0.37  | 0.32  | 0.20  | 0.14  |
| Russian Federation | G2521     | 1              | 0.98 | 0.84 | 0.37 | -0.05 | -0.22 | -0.27 | -0.25 | -0.18 | -0.11 | -0.03 | 0.05  | 0.10  | 0.12  | 0.17  | 0.17  | 0.13  | 0.12  |
| Russian Federation | G2522     | 1              | 1.00 | 0.99 | 0.99 | 0.97  | 0.94  | 0.90  | 0.86  | 0.82  | 0.76  | 0.69  | 0.56  | 0.47  | 0.40  | 0.35  | 0.30  | 0.16  | 0.09  |
| Russian Federation | G2523     | 1              | 1.00 | 1.00 | 0.99 | 0.98  | 0.97  | 0.94  | 0.92  | 0.89  | 0.87  | 0.84  | 0.77  | 0.70  | 0.65  | 0.60  | 0.55  | 0.43  | 0.37  |
| Russian Federation | G2528     | 1              | 1.00 | 1.00 | 0.99 | 0.98  | 0.96  | 0.93  | 0.91  | 0.89  | 0.87  | 0.85  | 0.81  | 0.77  | 0.74  | 0.71  | 0.68  | 0.58  | 0.47  |
| Russian Federation | G2529     | 1              | 1.00 | 0.98 | 0.94 | 0.83  | 0.71  | 0.61  | 0.52  | 0.46  | 0.42  | 0.38  | 0.36  | 0.35  | 0.33  | 0.29  | 0.25  | 0.16  | 0.15  |
| Russian Federation | G2530     | 1              | 1.00 | 0.98 | 0.94 | 0.90  | 0.85  | 0.79  | 0.74  | 0.69  | 0.63  | 0.58  | 0.51  | 0.49  | 0.46  | 0.43  | 0.38  | 0.32  | 0.30  |
| Russian Federation | G2536     | 1              | 1.00 | 1.00 | 0.99 | 0.97  | 0.94  | 0.89  | 0.83  | 0.76  | 0.70  | 0.63  | 0.49  | 0.38  | 0.29  | 0.22  | 0.17  | 0.12  | 0.05  |
| Russian Federation | G2537     | 1              | 0.92 | 0.71 | 0.55 | 0.47  | 0.39  | 0.33  | 0.29  | 0.25  | 0.21  | 0.19  | 0.19  | 0.17  | 0.12  | 0.03  | -0.05 | -0.16 | -0.24 |
| Russian Federation | G2538     | 1              | 1.00 | 0.99 | 0.98 | 0.95  | 0.92  | 0.89  | 0.86  | 0.83  | 0.79  | 0.75  | 0.68  | 0.60  | 0.54  | 0.49  | 0.44  | 0.30  | 0.17  |
| Russian Federation | G2539     | 1              | 0.99 | 0.93 | 0.83 | 0.72  | 0.61  | 0.53  | 0.46  | 0.42  | 0.38  | 0.36  | 0.33  | 0.32  | 0.29  | 0.23  | 0.16  | 0.12  | 0.13  |
| Russian Federation | G2540     | 1              | 0.99 | 0.95 | 0.83 | 0.69  | 0.58  | 0.52  | 0.48  | 0.46  | 0.43  | 0.42  | 0.38  | 0.34  | 0.29  | 0.21  | 0.16  | 0.15  | 0.13  |
| Russian Federation | G2547     | 1              | 1.00 | 0.99 | 0.99 | 0.97  | 0.95  | 0.91  | 0.86  | 0.81  | 0.75  | 0.68  | 0.54  | 0.43  | 0.35  | 0.31  | 0.29  | 0.27  | 0.23  |
| Russian Federation | G2548     | 1              | 1.00 | 1.00 | 1.00 | 0.99  | 0.99  | 0.98  | 0.97  | 0.96  | 0.95  | 0.94  | 0.91  | 0.86  | 0.81  | 0.74  | 0.67  | 0.44  | 0.21  |
| Russian Federation | G2549     | 1              | 0.99 | 0.96 | 0.91 | 0.82  | 0.71  | 0.60  | 0.50  | 0.42  | 0.34  | 0.27  | 0.18  | 0.13  | 0.09  | 0.08  | 0.09  | 0.14  | 0.18  |
| Russian Federation | G2550     | 1              | 1.00 | 0.99 | 0.96 | 0.91  | 0.83  | 0.74  | 0.64  | 0.57  | 0.53  | 0.50  | 0.46  | 0.43  | 0.39  | 0.35  | 0.30  | 0.17  | 0.10  |
| Russian Federation | G2551     | 1              | 0.96 | 0.86 | 0.76 | 0.71  | 0.67  | 0.62  | 0.59  | 0.57  | 0.54  | 0.52  | 0.51  | 0.47  | 0.46  | 0.43  | 0.40  | 0.37  | 0.37  |
| Russian Federation | G2558     | 1              | 0.99 | 0.96 | 0.86 | 0.70  | 0.56  | 0.48  | 0.43  | 0.39  | 0.36  | 0.35  | 0.32  | 0.32  | 0.30  | 0.24  | 0.17  | 0.01  | -0.07 |
| Russian Federation | G2559     | 1              | 1.00 | 1.00 | 0.99 | 0.98  | 0.97  | 0.96  | 0.95  | 0.93  | 0.91  | 0.89  | 0.86  | 0.82  | 0.79  | 0.76  | 0.73  | 0.63  | 0.54  |
| Russian Federation | G2560     | 1              | 1.00 | 0.98 | 0.93 | 0.85  | 0.73  | 0.56  | 0.37  | 0.22  | 0.12  | 0.04  | -0.04 | -0.05 | -0.05 | -0.02 | 0.01  | 0.01  | 0.02  |
| Russian Federation | G2561     | 1              | 0.95 | 0.81 | 0.71 | 0.64  | 0.56  | 0.49  | 0.44  | 0.41  | 0.37  | 0.33  | 0.31  | 0.28  | 0.26  | 0.24  | 0.21  | 0.20  | 0.19  |
| Russian Federation | G2562     | 1              | 1.00 | 0.97 | 0.89 | 0.76  | 0.64  | 0.54  | 0.48  | 0.43  | 0.40  | 0.37  | 0.35  | 0.33  | 0.31  | 0.28  | 0.25  | 0.16  | 0.16  |
| Russian Federation | G2563     | 1              | 0.91 | 0.71 | 0.54 | 0.41  | 0.33  | 0.29  | 0.25  | 0.21  | 0.19  | 0.20  | 0.20  | 0.17  | 0.11  | 0.10  | 0.09  | 0.08  | 0.10  |
| Russian Federation | G2564     | 1              | 1.00 | 0.97 | 0.92 | 0.83  | 0.72  | 0.63  | 0.56  | 0.51  | 0.48  | 0.45  | 0.40  | 0.37  | 0.34  | 0.30  | 0.23  | 0.19  | 0.19  |
| Russian Federation | G2565     | 1              | 1.00 | 0.97 | 0.89 | 0.78  | 0.68  | 0.61  | 0.57  | 0.53  | 0.50  | 0.48  | 0.43  | 0.39  | 0.36  | 0.34  | 0.30  | 0.26  | 0.28  |
| Russian Federation | G2569     | 1              | 0.98 | 0.90 | 0.72 | 0.56  | 0.45  | 0.37  | 0.33  | 0.29  | 0.27  | 0.26  | 0.27  | 0.29  | 0.27  | 0.26  | 0.23  | 0.04  | -0.08 |
| Russian Federation | G2570     | 1              | 1.00 | 0.99 | 0.98 | 0.96  | 0.94  | 0.92  | 0.89  | 0.85  | 0.81  | 0.77  | 0.69  | 0.61  | 0.56  | 0.51  | 0.47  | 0.33  | 0.20  |
| Russian Federation | G2571     | 1              | 0.92 | 0.70 | 0.56 | 0.48  | 0.40  | 0.35  | 0.32  | 0.30  | 0.27  | 0.25  | 0.24  | 0.23  | 0.20  | 0.16  | 0.11  | 0.04  | 0.02  |
| Russian Federation | G2572     | 1              | 1.00 | 1.00 | 0.99 | 0.99  | 0.97  | 0.93  | 0.89  | 0.84  | 0.79  | 0.75  | 0.70  | 0.66  | 0.63  | 0.59  | 0.55  | 0.43  | 0.33  |
| Russian Federation | G2573     | 1              | 1.00 | 0.99 | 0.98 | 0.95  | 0.91  | 0.86  | 0.81  | 0.76  | 0.73  | 0.71  | 0.67  | 0.64  | 0.61  | 0.57  | 0.53  | 0.42  | 0.33  |
| Russian Federation | G2574     | 1              | 1.00 | 1.00 | 0.99 | 0.98  | 0.95  | 0.92  | 0.87  | 0.82  | 0.77  | 0.72  | 0.64  | 0.56  | 0.49  | 0.44  | 0.38  | 0.27  | 0.24  |
| Russian Federation | G2575     | 1              | 0.99 | 0.95 | 0.87 | 0.79  | 0.74  | 0.69  | 0.66  | 0.63  | 0.61  | 0.59  | 0.56  | 0.52  | 0.50  | 0.47  | 0.45  | 0.40  | 0.37  |
| Russian Federation | G2576     | 1              | 0.98 | 0.90 | 0.77 | 0.62  | 0.50  | 0.42  | 0.38  | 0.37  | 0.38  | 0.38  | 0.41  | 0.41  | 0.41  | 0.37  | 0.35  | 0.29  | 0.28  |
| Russian Federation | G2577     | 1              | 0.98 | 0.90 | 0.76 | 0.61  | 0.49  | 0.42  | 0.38  | 0.36  | 0.36  | 0.36  | 0.37  | 0.37  | 0.37  | 0.34  | 0.29  | 0.25  | 0.25  |
| Russian Federation | G2578     | 1              | 1.00 | 1.00 | 0.99 | 0.97  | 0.95  | 0.92  | 0.88  | 0.83  | 0.76  | 0.69  | 0.57  | 0.48  | 0.42  | 0.37  | 0.32  | 0.18  | 0.11  |

| Country            | GloFAS ID | Station filter | LT1  | LT2  | LT3  | LT4  | LT5  | LT6  | LT7   | LT8   | LT9   | LT10  | LT12  | LT14  | LT16  | LT18  | LT20  | LT25  | L30   |
|--------------------|-----------|----------------|------|------|------|------|------|------|-------|-------|-------|-------|-------|-------|-------|-------|-------|-------|-------|
| Russian Federation | G2581     | 1              | 1.00 | 1.00 | 0.99 | 0.98 | 0.97 | 0.95 | 0.93  | 0.90  | 0.86  | 0.83  | 0.76  | 0.70  | 0.65  | 0.61  | 0.58  | 0.51  | 0.45  |
| Russian Federation | G2582     | 1              | 1.00 | 1.00 | 1.00 | 0.99 | 0.97 | 0.95 | 0.93  | 0.90  | 0.87  | 0.83  | 0.77  | 0.70  | 0.65  | 0.60  | 0.56  | 0.48  | 0.42  |
| Russian Federation | G2583     | 1              | 1.00 | 1.00 | 0.99 | 0.99 | 0.97 | 0.95 | 0.92  | 0.89  | 0.86  | 0.82  | 0.74  | 0.66  | 0.58  | 0.51  | 0.44  | 0.29  | 0.20  |
| Russian Federation | G2584     | 1              | 0.99 | 0.96 | 0.89 | 0.78 | 0.69 | 0.59 | 0.50  | 0.42  | 0.36  | 0.30  | 0.21  | 0.15  | 0.10  | 0.05  | 0.01  | -0.06 | -0.11 |
| Russian Federation | G2585     | 1              | 1.00 | 1.00 | 0.99 | 0.97 | 0.95 | 0.92 | 0.88  | 0.83  | 0.76  | 0.70  | 0.56  | 0.41  | 0.28  | 0.21  | 0.18  | 0.15  | 0.15  |
| Russian Federation | G2586     | 1              | 0.99 | 0.96 | 0.88 | 0.78 | 0.70 | 0.65 | 0.62  | 0.58  | 0.56  | 0.54  | 0.49  | 0.45  | 0.43  | 0.36  | 0.30  | 0.23  | 0.24  |
| Russian Federation | G2587     | 1              | 1.00 | 0.98 | 0.86 | 0.58 | 0.29 | 0.06 | -0.11 | -0.23 | -0.31 | -0.36 | -0.40 | -0.40 | -0.40 | -0.32 | 0.04  | 0.37  | 0.38  |
| Russian Federation | G2588     | 1              | 1.00 | 0.97 | 0.90 | 0.80 | 0.71 | 0.65 | 0.59  | 0.55  | 0.52  | 0.50  | 0.46  | 0.43  | 0.40  | 0.34  | 0.27  | 0.17  | 0.15  |
| Russian Federation | G2589     | 1              | 0.96 | 0.83 | 0.71 | 0.64 | 0.57 | 0.50 | 0.44  | 0.40  | 0.35  | 0.31  | 0.29  | 0.22  | 0.19  | 0.18  | 0.16  | 0.18  | 0.17  |
| Russian Federation | G2590     | 1              | 1.00 | 1.00 | 0.99 | 0.98 | 0.97 | 0.95 | 0.91  | 0.85  | 0.77  | 0.70  | 0.58  | 0.50  | 0.43  | 0.39  | 0.34  | 0.19  | 0.12  |
| Russian Federation | G2591     | 1              | 0.99 | 0.90 | 0.74 | 0.61 | 0.53 | 0.46 | 0.41  | 0.37  | 0.35  | 0.32  | 0.27  | 0.24  | 0.22  | 0.23  | 0.26  | 0.28  | 0.28  |
| Russian Federation | G2593     | 1              | 1.00 | 1.00 | 0.99 | 0.97 | 0.95 | 0.91 | 0.86  | 0.80  | 0.73  | 0.65  | 0.52  | 0.42  | 0.36  | 0.32  | 0.30  | 0.26  | 0.22  |
| Russian Federation | G2594     | 1              | 1.00 | 0.99 | 0.95 | 0.90 | 0.83 | 0.75 | 0.67  | 0.60  | 0.55  | 0.50  | 0.45  | 0.43  | 0.44  | 0.41  | 0.36  | 0.28  | 0.29  |
| Russian Federation | G2595     | 1              | 1.00 | 0.98 | 0.91 | 0.83 | 0.76 | 0.71 | 0.67  | 0.64  | 0.61  | 0.60  | 0.58  | 0.58  | 0.58  | 0.55  | 0.46  | 0.32  | 0.29  |
| Russian Federation | G2596     | 1              | 1.00 | 1.00 | 0.99 | 0.98 | 0.96 | 0.92 | 0.88  | 0.84  | 0.80  | 0.76  | 0.70  | 0.65  | 0.61  | 0.57  | 0.54  | 0.47  | 0.40  |
| Russian Federation | G2597     | 1              | 0.99 | 0.95 | 0.85 | 0.76 | 0.67 | 0.61 | 0.56  | 0.51  | 0.48  | 0.45  | 0.39  | 0.35  | 0.32  | 0.27  | 0.19  | 0.11  | 0.08  |
| Russian Federation | G2598     | 1              | 1.00 | 0.98 | 0.94 | 0.87 | 0.77 | 0.64 | 0.48  | 0.33  | 0.21  | 0.13  | 0.02  | -0.01 | -0.03 | -0.01 | 0.01  | 0.02  | 0.01  |
| Russian Federation | G2599     | 1              | 0.99 | 0.96 | 0.87 | 0.72 | 0.56 | 0.44 | 0.36  | 0.32  | 0.29  | 0.26  | 0.22  | 0.21  | 0.20  | 0.12  | 0.07  | 0.06  | 0.09  |
| Russian Federation | G2602     | 1              | 1.00 | 0.98 | 0.92 | 0.82 | 0.72 | 0.63 | 0.55  | 0.50  | 0.47  | 0.43  | 0.38  | 0.35  | 0.33  | 0.29  | 0.27  | 0.22  | 0.16  |
| Russian Federation | G2603     | 1              | 1.00 | 1.00 | 1.00 | 1.00 | 0.99 | 0.99 | 0.98  | 0.98  | 0.97  | 0.95  | 0.92  | 0.87  | 0.81  | 0.74  | 0.67  | 0.43  | 0.19  |
| Russian Federation | G2604     | 1              | 1.00 | 0.99 | 0.97 | 0.90 | 0.80 | 0.71 | 0.62  | 0.55  | 0.50  | 0.47  | 0.44  | 0.44  | 0.45  | 0.46  | 0.45  | 0.41  | 0.40  |
| Russian Federation | G2605     | 1              | 1.00 | 0.99 | 0.94 | 0.84 | 0.70 | 0.58 | 0.49  | 0.41  | 0.36  | 0.34  | 0.32  | 0.34  | 0.36  | 0.36  | 0.27  | 0.21  | 0.23  |
| Russian Federation | G2606     | 1              | 1.00 | 0.99 | 0.96 | 0.91 | 0.85 | 0.79 | 0.74  | 0.69  | 0.65  | 0.61  | 0.55  | 0.49  | 0.45  | 0.41  | 0.37  | 0.29  | 0.23  |
| Russian Federation | G2607     | 1              | 1.00 | 1.00 | 0.99 | 0.99 | 0.97 | 0.95 | 0.93  | 0.90  | 0.87  | 0.84  | 0.77  | 0.71  | 0.65  | 0.61  | 0.57  | 0.50  | 0.44  |
| Russian Federation | G2608     | 1              | 1.00 | 1.00 | 0.99 | 0.97 | 0.95 | 0.93 | 0.91  | 0.88  | 0.85  | 0.82  | 0.75  | 0.69  | 0.64  | 0.60  | 0.56  | 0.49  | 0.43  |
| Russian Federation | G2609     | 1              | 1.00 | 1.00 | 0.99 | 0.97 | 0.95 | 0.92 | 0.88  | 0.83  | 0.79  | 0.75  | 0.66  | 0.61  | 0.58  | 0.54  | 0.49  | 0.36  | 0.24  |
| Russian Federation | G2610     | 1              | 0.99 | 0.97 | 0.92 | 0.85 | 0.77 | 0.69 | 0.61  | 0.54  | 0.47  | 0.41  | 0.31  | 0.23  | 0.16  | 0.11  | 0.06  | -0.01 | -0.07 |
| Russian Federation | G2611     | 1              | 1.00 | 1.00 | 1.00 | 0.99 | 0.99 | 0.98 | 0.98  | 0.97  | 0.96  | 0.95  | 0.93  | 0.90  | 0.86  | 0.82  | 0.77  | 0.65  | 0.53  |
| Russian Federation | G2612     | 1              | 1.00 | 0.99 | 0.98 | 0.95 | 0.93 | 0.89 | 0.85  | 0.79  | 0.74  | 0.67  | 0.49  | 0.37  | 0.29  | 0.25  | 0.23  | 0.22  | 0.21  |
| Russian Federation | G2613     | 1              | 1.00 | 0.99 | 0.98 | 0.96 | 0.93 | 0.90 | 0.86  | 0.81  | 0.76  | 0.70  | 0.53  | 0.39  | 0.31  | 0.26  | 0.24  | 0.22  | 0.21  |
| Russian Federation | G2614     | 1              | 1.00 | 1.00 | 0.99 | 0.98 | 0.96 | 0.94 | 0.92  | 0.89  | 0.85  | 0.80  | 0.68  | 0.55  | 0.42  | 0.30  | 0.23  | 0.15  | 0.15  |
| Russian Federation | G2615     | 1              | 0.99 | 0.91 | 0.76 | 0.65 | 0.55 | 0.47 | 0.45  | 0.41  | 0.38  | 0.36  | 0.36  | 0.32  | 0.28  | 0.28  | 0.24  | 0.26  | 0.22  |
| Russian Federation | G2616     | 1              | 1.00 | 1.00 | 0.98 | 0.96 | 0.93 | 0.91 | 0.89  | 0.88  | 0.86  | 0.84  | 0.81  | 0.79  | 0.77  | 0.74  | 0.71  | 0.60  | 0.48  |
| Russian Federation | G2620     | 1              | 0.98 | 0.88 | 0.72 | 0.63 | 0.55 | 0.46 | 0.40  | 0.33  | 0.26  | 0.19  | 0.11  | 0.03  | -0.04 | -0.11 | -0.15 | -0.23 | -0.35 |
| Russian Federation | G2621     | 1              | 0.97 | 0.88 | 0.75 | 0.58 | 0.33 | 0.10 | -0.03 | -0.09 | -0.11 | -0.11 | -0.08 | -0.03 | 0.00  | 0.01  | 0.00  | 0.02  | 0.02  |
| Russian Federation | G2622     | 1              | 0.97 | 0.87 | 0.74 | 0.68 | 0.60 | 0.53 | 0.47  | 0.44  | 0.38  | 0.34  | 0.32  | 0.25  | 0.22  | 0.21  | 0.20  | 0.23  | 0.23  |
| Russian Federation | G2623     | 1              | 0.97 | 0.85 | 0.73 | 0.65 | 0.56 | 0.49 | 0.43  | 0.39  | 0.35  | 0.33  | 0.32  | 0.29  | 0.26  | 0.25  | 0.24  | 0.27  | 0.25  |
| Russian Federation | G2624     | 1              | 0.99 | 0.89 | 0.73 | 0.63 | 0.55 | 0.50 | 0.48  | 0.47  | 0.44  | 0.43  | 0.43  | 0.40  | 0.37  | 0.37  | 0.32  | 0.35  | 0.30  |
| Russian Federation | G2625     | 1              | 0.94 | 0.74 | 0.53 | 0.38 | 0.31 | 0.25 | 0.22  | 0.21  | 0.22  | 0.21  | 0.22  | 0.21  | 0.21  | 0.18  | 0.15  | 0.12  | 0.13  |

| Country            | GloFAS ID | Station filter | LT1  | LT2  | LT3  | LT4  | LT5   | LT6   | LT7   | LT8   | LT9   | LT10 | LT12 | LT14 | LT16 | LT18  | LT20  | LT25  | L30   |
|--------------------|-----------|----------------|------|------|------|------|-------|-------|-------|-------|-------|------|------|------|------|-------|-------|-------|-------|
| Russian Federation | G2626     | 1              | 0.99 | 0.89 | 0.71 | 0.55 | 0.47  | 0.44  | 0.39  | 0.34  | 0.33  | 0.33 | 0.31 | 0.27 | 0.22 | 0.17  | 0.09  | 0.10  | 0.06  |
| Russian Federation | G2632     | 1              | 1.00 | 1.00 | 0.97 | 0.92 | 0.85  | 0.76  | 0.68  | 0.60  | 0.54  | 0.50 | 0.44 | 0.40 | 0.37 | 0.36  | 0.36  | 0.30  | 0.23  |
| Russian Federation | G2633     | 1              | 1.00 | 1.00 | 0.99 | 0.98 | 0.96  | 0.94  | 0.93  | 0.91  | 0.90  | 0.88 | 0.85 | 0.82 | 0.79 | 0.75  | 0.71  | 0.60  | 0.50  |
| Russian Federation | G2634     | 1              | 1.00 | 1.00 | 0.99 | 0.98 | 0.96  | 0.95  | 0.94  | 0.92  | 0.91  | 0.90 | 0.88 | 0.85 | 0.82 | 0.78  | 0.73  | 0.62  | 0.51  |
| Russian Federation | G2635     | 1              | 1.00 | 1.00 | 0.99 | 0.98 | 0.96  | 0.94  | 0.91  | 0.87  | 0.83  | 0.78 | 0.71 | 0.64 | 0.57 | 0.51  | 0.46  | 0.33  | 0.28  |
| Russian Federation | G2636     | 1              | 0.99 | 0.93 | 0.82 | 0.74 | 0.71  | 0.69  | 0.67  | 0.67  | 0.67  | 0.66 | 0.66 | 0.63 | 0.63 | 0.61  | 0.61  | 0.57  | 0.54  |
| Russian Federation | G2637     | 1              | 1.00 | 0.99 | 0.99 | 0.97 | 0.94  | 0.91  | 0.85  | 0.76  | 0.63  | 0.50 | 0.35 | 0.26 | 0.24 | 0.25  | 0.26  | 0.28  | 0.25  |
| Russian Federation | G2638     | 1              | 1.00 | 0.99 | 0.98 | 0.96 | 0.94  | 0.91  | 0.87  | 0.81  | 0.73  | 0.62 | 0.46 | 0.36 | 0.30 | 0.28  | 0.27  | 0.26  | 0.23  |
| Russian Federation | G2639     | 1              | 1.00 | 0.99 | 0.96 | 0.93 | 0.89  | 0.84  | 0.79  | 0.73  | 0.64  | 0.54 | 0.39 | 0.30 | 0.25 | 0.24  | 0.23  | 0.23  | 0.20  |
| Russian Federation | G2640     | 1              | 0.97 | 0.85 | 0.69 | 0.59 | 0.47  | 0.39  | 0.34  | 0.30  | 0.27  | 0.25 | 0.23 | 0.19 | 0.17 | 0.17  | 0.14  | 0.18  | 0.14  |
| Russian Federation | G2641     | 1              | 1.00 | 0.99 | 0.97 | 0.94 | 0.92  | 0.90  | 0.88  | 0.86  | 0.85  | 0.83 | 0.80 | 0.78 | 0.76 | 0.73  | 0.70  | 0.58  | 0.46  |
| Russian Federation | G2642     | 1              | 1.00 | 0.99 | 0.97 | 0.95 | 0.93  | 0.91  | 0.89  | 0.87  | 0.85  | 0.84 | 0.81 | 0.79 | 0.76 | 0.74  | 0.70  | 0.58  | 0.46  |
| Russian Federation | G2643     | 1              | 0.96 | 0.74 | 0.35 | 0.02 | -0.11 | -0.13 | -0.11 | -0.08 | -0.02 | 0.04 | 0.09 | 0.14 | 0.14 | 0.12  | 0.06  | 0.02  | 0.05  |
| Russian Federation | G2648     | 1              | 0.99 | 0.95 | 0.87 | 0.78 | 0.70  | 0.60  | 0.52  | 0.45  | 0.41  | 0.37 | 0.32 | 0.28 | 0.26 | 0.23  | 0.21  | 0.18  | 0.14  |
| Russian Federation | G2649     | 1              | 1.00 | 0.99 | 0.96 | 0.92 | 0.88  | 0.83  | 0.77  | 0.71  | 0.66  | 0.61 | 0.54 | 0.48 | 0.43 | 0.39  | 0.37  | 0.33  | 0.29  |
| Russian Federation | G2650     | 1              | 0.99 | 0.95 | 0.89 | 0.82 | 0.76  | 0.71  | 0.67  | 0.61  | 0.59  | 0.57 | 0.53 | 0.51 | 0.48 | 0.48  | 0.47  | 0.45  | 0.41  |
| Russian Federation | G2651     | 1              | 0.98 | 0.88 | 0.65 | 0.52 | 0.48  | 0.48  | 0.48  | 0.51  | 0.53  | 0.55 | 0.61 | 0.60 | 0.61 | 0.59  | 0.60  | 0.56  | 0.54  |
| Russian Federation | G2652     | 1              | 0.96 | 0.83 | 0.74 | 0.66 | 0.59  | 0.53  | 0.49  | 0.44  | 0.39  | 0.37 | 0.34 | 0.31 | 0.27 | 0.27  | 0.27  | 0.28  | 0.26  |
| Russian Federation | G2653     | 1              | 0.98 | 0.90 | 0.72 | 0.58 | 0.49  | 0.46  | 0.45  | 0.44  | 0.45  | 0.45 | 0.45 | 0.44 | 0.43 | 0.44  | 0.42  | 0.42  | 0.39  |
| Russian Federation | G2654     | 1              | 1.00 | 1.00 | 0.98 | 0.97 | 0.95  | 0.93  | 0.91  | 0.89  | 0.87  | 0.85 | 0.82 | 0.80 | 0.77 | 0.74  | 0.71  | 0.58  | 0.46  |
| Russian Federation | G2655     | 1              | 1.00 | 0.99 | 0.97 | 0.95 | 0.93  | 0.90  | 0.87  | 0.84  | 0.81  | 0.78 | 0.74 | 0.73 | 0.72 | 0.70  | 0.67  | 0.55  | 0.43  |
| Russian Federation | G2656     | 1              | 0.96 | 0.72 | 0.35 | 0.12 | 0.05  | 0.06  | 0.09  | 0.11  | 0.15  | 0.20 | 0.22 | 0.25 | 0.24 | 0.17  | 0.12  | 0.11  | 0.10  |
| Russian Federation | G2657     | 1              | 0.99 | 0.93 | 0.82 | 0.69 | 0.56  | 0.45  | 0.38  | 0.35  | 0.35  | 0.36 | 0.39 | 0.41 | 0.42 | 0.38  | 0.34  | 0.28  | 0.26  |
| Russian Federation | G2660     | 1              | 1.00 | 1.00 | 0.99 | 0.98 | 0.96  | 0.94  | 0.91  | 0.88  | 0.85  | 0.81 | 0.73 | 0.65 | 0.58 | 0.50  | 0.43  | 0.30  | 0.21  |
| Russian Federation | G2661     | 1              | 0.98 | 0.88 | 0.69 | 0.54 | 0.45  | 0.37  | 0.31  | 0.27  | 0.23  | 0.19 | 0.16 | 0.14 | 0.09 | 0.03  | -0.02 | -0.06 | -0.13 |
| Russian Federation | G2662     | 1              | 1.00 | 0.98 | 0.95 | 0.92 | 0.89  | 0.85  | 0.81  | 0.77  | 0.73  | 0.69 | 0.63 | 0.56 | 0.50 | 0.46  | 0.42  | 0.37  | 0.32  |
| Russian Federation | G2663     | 1              | 1.00 | 1.00 | 1.00 | 0.99 | 0.99  | 0.98  | 0.98  | 0.97  | 0.96  | 0.96 | 0.93 | 0.89 | 0.84 | 0.80  | 0.76  | 0.65  | 0.53  |
| Russian Federation | G2664     | 1              | 1.00 | 1.00 | 0.99 | 0.97 | 0.95  | 0.92  | 0.89  | 0.85  | 0.81  | 0.79 | 0.75 | 0.74 | 0.72 | 0.70  | 0.67  | 0.54  | 0.43  |
| Russian Federation | G2665     | 1              | 0.96 | 0.82 | 0.66 | 0.53 | 0.45  | 0.40  | 0.37  | 0.35  | 0.35  | 0.34 | 0.35 | 0.34 | 0.34 | 0.30  | 0.26  | 0.23  | 0.19  |
| Russian Federation | G2666     | 1              | 0.90 | 0.67 | 0.49 | 0.37 | 0.30  | 0.25  | 0.24  | 0.24  | 0.24  | 0.24 | 0.23 | 0.22 | 0.22 | 0.20  | 0.15  | 0.12  | 0.13  |
| Russian Federation | G2667     | 1              | 0.98 | 0.82 | 0.53 | 0.37 | 0.31  | 0.25  | 0.20  | 0.19  | 0.17  | 0.16 | 0.15 | 0.12 | 0.08 | -0.02 | -0.07 | -0.05 | -0.07 |
| Russian Federation | G2673     | 1              | 1.00 | 0.99 | 0.96 | 0.92 | 0.87  | 0.80  | 0.72  | 0.64  | 0.58  | 0.52 | 0.43 | 0.37 | 0.32 | 0.29  | 0.27  | 0.24  | 0.19  |
| Russian Federation | G2674     | 1              | 0.84 | 0.60 | 0.42 | 0.31 | 0.25  | 0.20  | 0.17  | 0.17  | 0.15  | 0.15 | 0.17 | 0.15 | 0.14 | 0.16  | 0.14  | 0.10  | 0.09  |
| Russian Federation | G2675     | 1              | 0.94 | 0.77 | 0.63 | 0.54 | 0.50  | 0.46  | 0.40  | 0.37  | 0.36  | 0.36 | 0.34 | 0.30 | 0.27 | 0.24  | 0.21  | 0.19  | 0.13  |
| Russian Federation | G2679     | 1              | 1.00 | 0.94 | 0.79 | 0.64 | 0.54  | 0.47  | 0.43  | 0.40  | 0.38  | 0.36 | 0.33 | 0.31 | 0.30 | 0.33  | 0.33  | 0.26  | 0.20  |
| Russian Federation | G2680     | 1              | 1.00 | 1.00 | 0.99 | 0.97 | 0.94  | 0.89  | 0.83  | 0.76  | 0.68  | 0.60 | 0.49 | 0.40 | 0.36 | 0.33  | 0.31  | 0.28  | 0.22  |
| Russian Federation | G2681     | 1              | 0.99 | 0.98 | 0.92 | 0.80 | 0.65  | 0.52  | 0.42  | 0.35  | 0.30  | 0.26 | 0.21 | 0.18 | 0.16 | 0.13  | 0.06  | -0.07 | -0.10 |
| Russian Federation | G2685     | 1              | 1.00 | 0.99 | 0.97 | 0.91 | 0.82  | 0.72  | 0.64  | 0.57  | 0.52  | 0.48 | 0.43 | 0.40 | 0.38 | 0.36  | 0.35  | 0.28  | 0.23  |
| Russian Federation | G2686     | 1              | 1.00 | 0.99 | 0.98 | 0.95 | 0.92  | 0.88  | 0.84  | 0.81  | 0.78  | 0.76 | 0.73 | 0.71 | 0.70 | 0.70  | 0.69  | 0.67  | 0.65  |

| Country            | GloFAS ID | Station filter | LT1  | LT2  | LT3  | LT4  | LT5  | LT6  | LT7  | LT8  | LT9   | LT10  | LT12  | LT14  | LT16  | LT18  | LT20  | LT25  | L30   |
|--------------------|-----------|----------------|------|------|------|------|------|------|------|------|-------|-------|-------|-------|-------|-------|-------|-------|-------|
| Russian Federation | G2687     | 1              | 0.99 | 0.96 | 0.84 | 0.66 | 0.46 | 0.27 | 0.14 | 0.06 | -0.02 | -0.05 | -0.08 | -0.10 | -0.09 | -0.16 | -0.40 | -0.64 | -0.62 |
| Russian Federation | G2688     | 1              | 1.00 | 1.00 | 0.98 | 0.95 | 0.91 | 0.87 | 0.83 | 0.80 | 0.78  | 0.76  | 0.75  | 0.73  | 0.70  | 0.66  | 0.61  | 0.49  | 0.38  |
| Russian Federation | G2689     | 1              | 1.00 | 1.00 | 0.98 | 0.96 | 0.92 | 0.87 | 0.83 | 0.81 | 0.79  | 0.77  | 0.76  | 0.73  | 0.70  | 0.66  | 0.61  | 0.48  | 0.38  |
| Russian Federation | G2690     | 1              | 0.97 | 0.85 | 0.61 | 0.41 | 0.31 | 0.27 | 0.27 | 0.28 | 0.30  | 0.32  | 0.33  | 0.36  | 0.36  | 0.35  | 0.32  | 0.24  | 0.18  |
| Russian Federation | G2694     | 1              | 1.00 | 0.99 | 0.99 | 0.99 | 0.98 | 0.98 | 0.98 | 0.98 | 0.98  | 0.98  | 0.97  | 0.97  | 0.97  | 0.97  | 0.97  | 0.97  | 0.96  |
| Russian Federation | G2695     | 1              | 0.99 | 0.95 | 0.90 | 0.85 | 0.75 | 0.62 | 0.55 | 0.51 | 0.50  | 0.48  | 0.47  | 0.46  | 0.43  | 0.43  | 0.41  | 0.38  | 0.35  |
| Russian Federation | G2696     | 1              | 0.99 | 0.83 | 0.53 | 0.38 | 0.31 | 0.29 | 0.27 | 0.25 | 0.25  | 0.25  | 0.27  | 0.27  | 0.31  | 0.33  | 0.36  | 0.36  | 0.36  |
| Russian Federation | G2698     | 1              | 1.00 | 0.97 | 0.91 | 0.84 | 0.77 | 0.69 | 0.65 | 0.61 | 0.58  | 0.56  | 0.52  | 0.51  | 0.49  | 0.49  | 0.47  | 0.46  | 0.42  |
| Russian Federation | G2699     | 1              | 0.99 | 0.97 | 0.95 | 0.92 | 0.89 | 0.85 | 0.82 | 0.79 | 0.75  | 0.71  | 0.64  | 0.57  | 0.51  | 0.46  | 0.43  | 0.39  | 0.32  |
| Russian Federation | G2705     | 1              | 1.00 | 0.98 | 0.92 | 0.82 | 0.71 | 0.60 | 0.50 | 0.43 | 0.40  | 0.39  | 0.40  | 0.42  | 0.43  | 0.42  | 0.37  | 0.29  | 0.25  |
| Russian Federation | G2706     | 1              | 0.98 | 0.89 | 0.79 | 0.71 | 0.64 | 0.59 | 0.55 | 0.52 | 0.50  | 0.48  | 0.45  | 0.44  | 0.39  | 0.35  | 0.33  | 0.28  | 0.24  |
| Russian Federation | G2707     | 1              | 1.00 | 0.99 | 0.97 | 0.92 | 0.78 | 0.59 | 0.44 | 0.35 | 0.30  | 0.29  | 0.30  | 0.29  | 0.26  | 0.22  | 0.12  | -0.04 | -0.01 |
| Russian Federation | G2712     | 1              | 1.00 | 1.00 | 0.98 | 0.96 | 0.93 | 0.90 | 0.88 | 0.87 | 0.85  | 0.84  | 0.81  | 0.77  | 0.72  | 0.67  | 0.62  | 0.49  | 0.38  |
| Russian Federation | G2713     | 1              | 1.00 | 0.98 | 0.94 | 0.88 | 0.81 | 0.74 | 0.68 | 0.62 | 0.56  | 0.51  | 0.46  | 0.43  | 0.39  | 0.33  | 0.26  | 0.19  | 0.16  |
| Russian Federation | G2714     | 1              | 1.00 | 0.99 | 0.98 | 0.96 | 0.92 | 0.87 | 0.81 | 0.75 | 0.69  | 0.63  | 0.53  | 0.48  | 0.44  | 0.40  | 0.34  | 0.22  | 0.18  |
| Russian Federation | G2715     | 1              | 1.00 | 0.97 | 0.89 | 0.77 | 0.68 | 0.62 | 0.58 | 0.55 | 0.52  | 0.49  | 0.45  | 0.41  | 0.35  | 0.26  | 0.17  | 0.15  | 0.15  |
| Russian Federation | G2718     | 1              | 1.00 | 0.99 | 0.98 | 0.96 | 0.95 | 0.94 | 0.93 | 0.91 | 0.88  | 0.84  | 0.79  | 0.74  | 0.69  | 0.65  | 0.59  | 0.54  | 0.48  |
| Russian Federation | G2719     | 1              | 1.00 | 0.99 | 0.97 | 0.94 | 0.91 | 0.89 | 0.87 | 0.86 | 0.85  | 0.84  | 0.81  | 0.76  | 0.71  | 0.66  | 0.61  | 0.48  | 0.37  |
| Russian Federation | G2720     | 1              | 0.98 | 0.89 | 0.73 | 0.57 | 0.47 | 0.40 | 0.37 | 0.35 | 0.34  | 0.34  | 0.35  | 0.34  | 0.34  | 0.31  | 0.25  | 0.16  | 0.13  |
| Russian Federation | G2721     | 1              | 1.00 | 1.00 | 0.99 | 0.97 | 0.94 | 0.91 | 0.84 | 0.77 | 0.70  | 0.65  | 0.56  | 0.50  | 0.47  | 0.43  | 0.39  | 0.27  | 0.25  |
| Russian Federation | G2728     | 1              | 1.00 | 0.96 | 0.84 | 0.69 | 0.58 | 0.49 | 0.42 | 0.37 | 0.33  | 0.29  | 0.24  | 0.22  | 0.18  | 0.12  | 0.07  | 0.00  | -0.05 |
| Russian Federation | G2729     | 1              | 1.00 | 1.00 | 0.99 | 0.99 | 0.98 | 0.97 | 0.95 | 0.94 | 0.92  | 0.91  | 0.87  | 0.83  | 0.79  | 0.74  | 0.70  | 0.60  | 0.49  |
| Russian Federation | G2730     | 1              | 1.00 | 0.99 | 0.98 | 0.95 | 0.93 | 0.91 | 0.90 | 0.89 | 0.88  | 0.87  | 0.83  | 0.77  | 0.72  | 0.67  | 0.61  | 0.49  | 0.37  |
| Russian Federation | G2731     | 1              | 0.99 | 0.96 | 0.89 | 0.82 | 0.74 | 0.68 | 0.64 | 0.60 | 0.57  | 0.56  | 0.54  | 0.50  | 0.45  | 0.43  | 0.40  | 0.36  | 0.33  |
| Russian Federation | G2732     | 1              | 0.98 | 0.90 | 0.79 | 0.69 | 0.60 | 0.54 | 0.51 | 0.50 | 0.49  | 0.47  | 0.44  | 0.43  | 0.39  | 0.36  | 0.32  | 0.30  | 0.28  |
| Russian Federation | G2739     | 1              | 1.00 | 0.98 | 0.90 | 0.78 | 0.68 | 0.60 | 0.54 | 0.50 | 0.47  | 0.45  | 0.41  | 0.38  | 0.37  | 0.35  | 0.33  | 0.27  | 0.21  |
| Russian Federation | G2740     | 1              | 1.00 | 0.98 | 0.93 | 0.84 | 0.76 | 0.68 | 0.62 | 0.57 | 0.53  | 0.51  | 0.46  | 0.43  | 0.41  | 0.39  | 0.36  | 0.31  | 0.27  |
| Russian Federation | G2741     | 1              | 1.00 | 1.00 | 0.99 | 0.99 | 0.97 | 0.95 | 0.92 | 0.88 | 0.84  | 0.79  | 0.71  | 0.63  | 0.55  | 0.48  | 0.41  | 0.30  | 0.22  |
| Russian Federation | G2742     | 1              | 1.00 | 0.99 | 0.98 | 0.95 | 0.91 | 0.87 | 0.83 | 0.79 | 0.74  | 0.69  | 0.59  | 0.50  | 0.41  | 0.31  | 0.24  | 0.08  | 0.00  |
| Russian Federation | G2743     | 1              | 1.00 | 0.96 | 0.87 | 0.74 | 0.58 | 0.45 | 0.36 | 0.31 | 0.29  | 0.28  | 0.30  | 0.30  | 0.32  | 0.31  | 0.29  | 0.18  | 0.13  |
| Russian Federation | G2751     | 1              | 1.00 | 0.97 | 0.87 | 0.75 | 0.64 | 0.56 | 0.50 | 0.46 | 0.44  | 0.41  | 0.38  | 0.36  | 0.35  | 0.32  | 0.30  | 0.24  | 0.21  |
| Russian Federation | G2752     | 1              | 1.00 | 1.00 | 1.00 | 0.99 | 0.99 | 0.98 | 0.97 | 0.96 | 0.94  | 0.92  | 0.86  | 0.80  | 0.73  | 0.65  | 0.57  | 0.30  | 0.12  |
| Russian Federation | G2753     | 1              | 1.00 | 0.97 | 0.89 | 0.79 | 0.70 | 0.62 | 0.56 | 0.51 | 0.47  | 0.44  | 0.39  | 0.35  | 0.31  | 0.31  | 0.30  | 0.24  | 0.19  |
| Russian Federation | G2754     | 1              | 1.00 | 1.00 | 0.98 | 0.97 | 0.96 | 0.95 | 0.95 | 0.94 | 0.93  | 0.91  | 0.86  | 0.80  | 0.74  | 0.68  | 0.63  | 0.50  | 0.38  |
| Russian Federation | G2755     | 1              | 0.99 | 0.94 | 0.85 | 0.75 | 0.67 | 0.62 | 0.59 | 0.57 | 0.56  | 0.55  | 0.52  | 0.48  | 0.45  | 0.41  | 0.36  | 0.29  | 0.26  |
| Russian Federation | G2759     | 1              | 0.99 | 0.96 | 0.91 | 0.82 | 0.73 | 0.64 | 0.58 | 0.52 | 0.48  | 0.44  | 0.38  | 0.35  | 0.34  | 0.33  | 0.32  | 0.31  | 0.28  |
| Russian Federation | G2766     | 1              | 0.99 | 0.98 | 0.97 | 0.94 | 0.89 | 0.82 | 0.76 | 0.70 | 0.65  | 0.61  | 0.55  | 0.52  | 0.51  | 0.47  | 0.23  | -0.25 | -0.25 |
| Russian Federation | G2767     | 1              | 0.99 | 0.97 | 0.94 | 0.86 | 0.77 | 0.67 | 0.59 | 0.53 | 0.48  | 0.44  | 0.41  | 0.40  | 0.39  | 0.34  | 0.21  | 0.10  | 0.13  |
| Russian Federation | G2768     | 1              | 1.00 | 1.00 | 1.00 | 0.99 | 0.98 | 0.98 | 0.97 | 0.96 | 0.94  | 0.93  | 0.89  | 0.85  | 0.80  | 0.76  | 0.71  | 0.60  | 0.48  |

| Country            | GloFAS ID | Station filter | LT1  | LT2  | LT3  | LT4  | LT5  | LT6  | LT7  | LT8  | LT9   | LT10  | LT12  | LT14  | LT16  | LT18  | LT20  | LT25  | L30   |
|--------------------|-----------|----------------|------|------|------|------|------|------|------|------|-------|-------|-------|-------|-------|-------|-------|-------|-------|
| Russian Federation | G2769     | 1              | 1.00 | 0.99 | 0.97 | 0.95 | 0.93 | 0.90 | 0.87 | 0.84 | 0.79  | 0.75  | 0.67  | 0.60  | 0.54  | 0.50  | 0.47  | 0.40  | 0.33  |
| Russian Federation | G2770     | 1              | 1.00 | 1.00 | 1.00 | 0.99 | 0.99 | 0.98 | 0.97 | 0.97 | 0.96  | 0.95  | 0.91  | 0.86  | 0.82  | 0.77  | 0.74  | 0.62  | 0.50  |
| Russian Federation | G2771     | 1              | 1.00 | 0.99 | 0.96 | 0.93 | 0.87 | 0.80 | 0.74 | 0.67 | 0.60  | 0.56  | 0.51  | 0.48  | 0.45  | 0.40  | 0.34  | 0.26  | 0.22  |
| Russian Federation | G2772     | 1              | 0.99 | 0.95 | 0.86 | 0.76 | 0.69 | 0.64 | 0.60 | 0.56 | 0.53  | 0.51  | 0.47  | 0.44  | 0.42  | 0.36  | 0.33  | 0.31  | 0.31  |
| Russian Federation | G2779     | 1              | 0.99 | 0.96 | 0.90 | 0.83 | 0.76 | 0.71 | 0.66 | 0.63 | 0.61  | 0.59  | 0.57  | 0.56  | 0.56  | 0.56  | 0.55  | 0.54  | 0.54  |
| Russian Federation | G2780     | 1              | 0.99 | 0.96 | 0.91 | 0.84 | 0.76 | 0.69 | 0.64 | 0.60 | 0.56  | 0.54  | 0.52  | 0.52  | 0.52  | 0.53  | 0.48  | 0.45  | 0.46  |
| Russian Federation | G2781     | 1              | 1.00 | 0.97 | 0.91 | 0.85 | 0.79 | 0.73 | 0.66 | 0.60 | 0.55  | 0.51  | 0.44  | 0.38  | 0.34  | 0.31  | 0.29  | 0.24  | 0.20  |
| Russian Federation | G2782     | 1              | 1.00 | 0.99 | 0.98 | 0.96 | 0.94 | 0.92 | 0.88 | 0.85 | 0.80  | 0.76  | 0.68  | 0.61  | 0.56  | 0.51  | 0.48  | 0.41  | 0.35  |
| Russian Federation | G2783     | 1              | 0.95 | 0.86 | 0.80 | 0.71 | 0.63 | 0.58 | 0.55 | 0.50 | 0.44  | 0.43  | 0.38  | 0.37  | 0.31  | 0.29  | 0.26  | 0.24  | 0.20  |
| Russian Federation | G2784     | 1              | 0.98 | 0.87 | 0.66 | 0.48 | 0.37 | 0.31 | 0.30 | 0.29 | 0.30  | 0.30  | 0.29  | 0.29  | 0.25  | 0.10  | 0.03  | 0.05  | 0.09  |
| Russian Federation | G2785     | 1              | 0.94 | 0.69 | 0.45 | 0.30 | 0.23 | 0.20 | 0.19 | 0.20 | 0.23  | 0.24  | 0.25  | 0.21  | 0.15  | -0.03 | -0.10 | -0.11 | -0.09 |
| Russian Federation | G2789     | 1              | 1.00 | 0.98 | 0.94 | 0.91 | 0.86 | 0.81 | 0.76 | 0.71 | 0.65  | 0.59  | 0.48  | 0.40  | 0.32  | 0.27  | 0.22  | 0.11  | 0.02  |
| Russian Federation | G2790     | 1              | 0.97 | 0.84 | 0.66 | 0.48 | 0.32 | 0.18 | 0.08 | 0.00 | -0.06 | -0.09 | -0.17 | -0.22 | -0.27 | -0.34 | -0.35 | -0.37 | -0.44 |
| Russian Federation | G2791     | 1              | 0.98 | 0.91 | 0.80 | 0.68 | 0.58 | 0.48 | 0.39 | 0.33 | 0.30  | 0.27  | 0.21  | 0.16  | 0.13  | 0.10  | 0.08  | 0.02  | -0.03 |
| Russian Federation | G2792     | 1              | 0.96 | 0.87 | 0.80 | 0.73 | 0.66 | 0.59 | 0.55 | 0.51 | 0.45  | 0.42  | 0.36  | 0.32  | 0.27  | 0.25  | 0.22  | 0.18  | 0.13  |
| Russian Federation | G2797     | 1              | 1.00 | 0.97 | 0.91 | 0.82 | 0.70 | 0.58 | 0.48 | 0.40 | 0.33  | 0.27  | 0.20  | 0.14  | 0.09  | 0.05  | 0.03  | -0.03 | -0.08 |
| Russian Federation | G2798     | 1              | 1.00 | 0.98 | 0.94 | 0.90 | 0.84 | 0.78 | 0.72 | 0.66 | 0.61  | 0.56  | 0.48  | 0.41  | 0.35  | 0.30  | 0.27  | 0.19  | 0.15  |
| Russian Federation | G2799     | 1              | 1.00 | 0.99 | 0.97 | 0.93 | 0.89 | 0.84 | 0.79 | 0.74 | 0.68  | 0.63  | 0.55  | 0.49  | 0.43  | 0.38  | 0.34  | 0.27  | 0.23  |
| Russian Federation | G2800     | 1              | 0.99 | 0.93 | 0.86 | 0.79 | 0.72 | 0.65 | 0.60 | 0.55 | 0.50  | 0.48  | 0.44  | 0.39  | 0.37  | 0.35  | 0.34  | 0.32  | 0.28  |
| Russian Federation | G2801     | 1              | 0.99 | 0.94 | 0.82 | 0.70 | 0.61 | 0.56 | 0.53 | 0.50 | 0.48  | 0.47  | 0.43  | 0.43  | 0.42  | 0.40  | 0.37  | 0.30  | 0.26  |
| Russian Federation | G2808     | 1              | 1.00 | 0.98 | 0.94 | 0.88 | 0.81 | 0.74 | 0.67 | 0.60 | 0.54  | 0.49  | 0.40  | 0.33  | 0.27  | 0.22  | 0.17  | 0.09  | 0.04  |
| Russian Federation | G2809     | 1              | 1.00 | 0.97 | 0.92 | 0.85 | 0.78 | 0.71 | 0.64 | 0.57 | 0.51  | 0.47  | 0.38  | 0.31  | 0.25  | 0.19  | 0.15  | 0.08  | 0.02  |
| Russian Federation | G2810     | 1              | 1.00 | 0.97 | 0.90 | 0.85 | 0.80 | 0.72 | 0.64 | 0.58 | 0.52  | 0.46  | 0.38  | 0.31  | 0.26  | 0.22  | 0.18  | 0.11  | 0.07  |
| Russian Federation | G2811     | 1              | 1.00 | 1.00 | 1.00 | 0.99 | 0.99 | 0.98 | 0.97 | 0.96 | 0.93  | 0.91  | 0.84  | 0.77  | 0.71  | 0.65  | 0.60  | 0.48  | 0.35  |
| Russian Federation | G2812     | 1              | 1.00 | 0.97 | 0.94 | 0.89 | 0.82 | 0.75 | 0.68 | 0.62 | 0.59  | 0.57  | 0.54  | 0.51  | 0.48  | 0.43  | 0.39  | 0.31  | 0.27  |
| Russian Federation | G2817     | 1              | 1.00 | 0.99 | 0.96 | 0.93 | 0.89 | 0.84 | 0.78 | 0.72 | 0.67  | 0.63  | 0.56  | 0.49  | 0.43  | 0.38  | 0.34  | 0.24  | 0.17  |
| Russian Federation | G2818     | 1              | 0.99 | 0.95 | 0.88 | 0.80 | 0.71 | 0.63 | 0.56 | 0.49 | 0.45  | 0.43  | 0.39  | 0.35  | 0.32  | 0.30  | 0.27  | 0.24  | 0.19  |
| Russian Federation | G2819     | 1              | 0.98 | 0.89 | 0.73 | 0.58 | 0.45 | 0.37 | 0.33 | 0.30 | 0.28  | 0.26  | 0.23  | 0.21  | 0.16  | 0.05  | -0.01 | 0.00  | 0.02  |
| Russian Federation | G2833     | 1              | 0.99 | 0.97 | 0.91 | 0.83 | 0.73 | 0.64 | 0.57 | 0.51 | 0.47  | 0.45  | 0.43  | 0.42  | 0.44  | 0.36  | 0.21  | 0.13  | 0.14  |
| Russian Federation | G2834     | 1              | 1.00 | 0.99 | 0.96 | 0.92 | 0.87 | 0.81 | 0.75 | 0.69 | 0.65  | 0.61  | 0.56  | 0.54  | 0.53  | 0.52  | 0.51  | 0.47  | 0.47  |
| Russian Federation | G2835     | 1              | 1.00 | 0.98 | 0.95 | 0.90 | 0.84 | 0.76 | 0.69 | 0.62 | 0.56  | 0.52  | 0.47  | 0.45  | 0.44  | 0.42  | 0.35  | 0.24  | 0.25  |
| Russian Federation | G2839     | 1              | 0.99 | 0.97 | 0.91 | 0.81 | 0.70 | 0.60 | 0.52 | 0.47 | 0.43  | 0.41  | 0.38  | 0.37  | 0.37  | 0.38  | 0.43  | 0.44  | 0.42  |
| Russian Federation | G2840     | 1              | 0.99 | 0.97 | 0.92 | 0.86 | 0.77 | 0.70 | 0.64 | 0.59 | 0.56  | 0.55  | 0.52  | 0.51  | 0.51  | 0.50  | 0.43  | 0.31  | 0.30  |
| Russian Federation | G2841     | 1              | 1.00 | 0.99 | 0.96 | 0.91 | 0.86 | 0.79 | 0.72 | 0.66 | 0.61  | 0.56  | 0.51  | 0.49  | 0.48  | 0.46  | 0.42  | 0.34  | 0.34  |
| Russian Federation | G2842     | 1              | 0.99 | 0.98 | 0.96 | 0.93 | 0.87 | 0.80 | 0.74 | 0.67 | 0.62  | 0.58  | 0.54  | 0.51  | 0.49  | 0.46  | 0.42  | 0.37  | 0.35  |
| Russian Federation | G2843     | 1              | 1.00 | 0.99 | 0.98 | 0.96 | 0.92 | 0.88 | 0.82 | 0.76 | 0.70  | 0.66  | 0.59  | 0.56  | 0.53  | 0.51  | 0.48  | 0.33  | 0.29  |
| Russian Federation | G2844     | 1              | 1.00 | 1.00 | 0.99 | 0.99 | 0.98 | 0.98 | 0.97 | 0.96 | 0.95  | 0.93  | 0.89  | 0.84  | 0.79  | 0.75  | 0.71  | 0.59  | 0.48  |
| Russian Federation | G2845     | 1              | 0.99 | 0.98 | 0.96 | 0.94 | 0.91 | 0.89 | 0.86 | 0.83 | 0.79  | 0.77  | 0.71  | 0.66  | 0.61  | 0.57  | 0.53  | 0.45  | 0.40  |
| Russian Federation | G2846     | 1              | 1.00 | 1.00 | 0.99 | 0.98 | 0.97 | 0.95 | 0.93 | 0.91 | 0.88  | 0.85  | 0.78  | 0.71  | 0.63  | 0.53  | 0.42  | 0.18  | 0.08  |

| Country            | GloFAS ID | Station filter | LT1  | LT2  | LT3  | LT4  | LT5  | LT6  | LT7  | LT8  | LT9  | LT10 | LT12  | LT14  | LT16  | LT18  | LT20  | LT25  | L30   |
|--------------------|-----------|----------------|------|------|------|------|------|------|------|------|------|------|-------|-------|-------|-------|-------|-------|-------|
| Russian Federation | G2847     | 1              | 1.00 | 1.00 | 1.00 | 0.99 | 0.98 | 0.96 | 0.94 | 0.91 | 0.88 | 0.85 | 0.78  | 0.70  | 0.62  | 0.51  | 0.40  | 0.17  | 0.08  |
| Russian Federation | G2848     | 1              | 1.00 | 1.00 | 0.99 | 0.98 | 0.97 | 0.95 | 0.93 | 0.90 | 0.87 | 0.84 | 0.76  | 0.66  | 0.54  | 0.40  | 0.29  | 0.12  | 0.05  |
| Russian Federation | G2849     | 1              | 1.00 | 0.98 | 0.93 | 0.84 | 0.73 | 0.61 | 0.52 | 0.45 | 0.40 | 0.37 | 0.33  | 0.32  | 0.32  | 0.32  | 0.34  | 0.39  | 0.39  |
| Russian Federation | G2850     | 1              | 0.99 | 0.97 | 0.93 | 0.86 | 0.77 | 0.67 | 0.58 | 0.52 | 0.47 | 0.44 | 0.40  | 0.39  | 0.38  | 0.36  | 0.33  | 0.30  | 0.30  |
| Russian Federation | G2851     | 1              | 1.00 | 0.99 | 0.97 | 0.94 | 0.89 | 0.85 | 0.80 | 0.74 | 0.69 | 0.65 | 0.58  | 0.54  | 0.52  | 0.49  | 0.47  | 0.36  | 0.32  |
| Russian Federation | G2852     | 1              | 1.00 | 0.97 | 0.87 | 0.77 | 0.69 | 0.62 | 0.58 | 0.54 | 0.52 | 0.50 | 0.48  | 0.46  | 0.44  | 0.45  | 0.46  | 0.45  | 0.42  |
| Russian Federation | G2857     | 1              | 0.99 | 0.97 | 0.91 | 0.83 | 0.73 | 0.63 | 0.54 | 0.46 | 0.40 | 0.36 | 0.31  | 0.29  | 0.28  | 0.15  | 0.06  | 0.03  | 0.03  |
| Russian Federation | G2858     | 1              | 1.00 | 1.00 | 0.99 | 0.98 | 0.97 | 0.95 | 0.93 | 0.90 | 0.88 | 0.84 | 0.77  | 0.69  | 0.59  | 0.47  | 0.35  | 0.14  | 0.07  |
| Russian Federation | G2859     | 1              | 1.00 | 1.00 | 0.99 | 0.97 | 0.95 | 0.91 | 0.85 | 0.80 | 0.74 | 0.68 | 0.59  | 0.53  | 0.49  | 0.44  | 0.37  | 0.26  | 0.23  |
| Russian Federation | G2860     | 1              | 1.00 | 0.99 | 0.97 | 0.94 | 0.90 | 0.85 | 0.80 | 0.75 | 0.70 | 0.65 | 0.58  | 0.54  | 0.51  | 0.47  | 0.43  | 0.32  | 0.29  |
| Russian Federation | G2861     | 1              | 0.99 | 0.95 | 0.90 | 0.83 | 0.72 | 0.65 | 0.62 | 0.58 | 0.52 | 0.48 | 0.41  | 0.36  | 0.34  | 0.31  | 0.26  | 0.23  | 0.18  |
| Russian Federation | G2863     | 1              | 1.00 | 0.99 | 0.96 | 0.91 | 0.84 | 0.75 | 0.66 | 0.57 | 0.49 | 0.42 | 0.31  | 0.25  | 0.22  | 0.23  | 0.29  | 0.39  | 0.38  |
| Russian Federation | G2864     | 1              | 1.00 | 0.98 | 0.91 | 0.80 | 0.65 | 0.50 | 0.36 | 0.24 | 0.14 | 0.07 | -0.04 | -0.12 | -0.17 | -0.20 | -0.20 | -0.23 | -0.28 |
| Russian Federation | G2865     | 1              | 0.99 | 0.90 | 0.76 | 0.60 | 0.48 | 0.40 | 0.33 | 0.27 | 0.23 | 0.20 | 0.15  | 0.10  | 0.06  | 0.03  | 0.00  | -0.03 | -0.07 |
| Russian Federation | G2866     | 1              | 1.00 | 0.97 | 0.89 | 0.78 | 0.66 | 0.55 | 0.46 | 0.38 | 0.32 | 0.27 | 0.21  | 0.15  | 0.11  | 0.08  | 0.06  | 0.01  | -0.05 |
| Russian Federation | G2867     | 1              | 1.00 | 0.98 | 0.94 | 0.89 | 0.85 | 0.79 | 0.72 | 0.66 | 0.60 | 0.56 | 0.50  | 0.44  | 0.39  | 0.37  | 0.35  | 0.30  | 0.26  |
| Russian Federation | G2868     | 1              | 1.00 | 0.99 | 0.96 | 0.92 | 0.88 | 0.83 | 0.77 | 0.70 | 0.64 | 0.58 | 0.46  | 0.35  | 0.23  | 0.14  | 0.06  | -0.09 | -0.16 |
| Russian Federation | G2869     | 1              | 1.00 | 1.00 | 1.00 | 0.99 | 0.99 | 0.98 | 0.96 | 0.94 | 0.92 | 0.88 | 0.81  | 0.75  | 0.68  | 0.63  | 0.58  | 0.46  | 0.34  |
| Russian Federation | G2872     | 1              | 0.98 | 0.94 | 0.85 | 0.73 | 0.63 | 0.56 | 0.50 | 0.45 | 0.42 | 0.40 | 0.37  | 0.34  | 0.33  | 0.33  | 0.33  | 0.31  | 0.27  |
| Russian Federation | G2873     | 1              | 1.00 | 0.99 | 0.98 | 0.96 | 0.94 | 0.91 | 0.87 | 0.82 | 0.77 | 0.71 | 0.60  | 0.52  | 0.47  | 0.44  | 0.41  | 0.31  | 0.27  |
| Russian Federation | G2874     | 1              | 1.00 | 1.00 | 0.99 | 0.97 | 0.95 | 0.93 | 0.90 | 0.87 | 0.84 | 0.81 | 0.75  | 0.68  | 0.62  | 0.56  | 0.51  | 0.43  | 0.37  |
| Russian Federation | G2877     | 1              | 1.00 | 1.00 | 0.99 | 0.98 | 0.96 | 0.94 | 0.92 | 0.90 | 0.88 | 0.84 | 0.76  | 0.65  | 0.50  | 0.36  | 0.25  | 0.12  | 0.08  |
| Russian Federation | G2878     | 1              | 1.00 | 0.97 | 0.90 | 0.81 | 0.70 | 0.59 | 0.50 | 0.41 | 0.34 | 0.30 | 0.23  | 0.18  | 0.14  | 0.11  | 0.08  | 0.04  | 0.00  |
| Russian Federation | G2879     | 1              | 0.99 | 0.97 | 0.93 | 0.89 | 0.85 | 0.81 | 0.76 | 0.72 | 0.69 | 0.66 | 0.60  | 0.56  | 0.53  | 0.50  | 0.48  | 0.44  | 0.42  |
| Russian Federation | G2883     | 1              | 1.00 | 0.99 | 0.96 | 0.90 | 0.83 | 0.75 | 0.68 | 0.61 | 0.57 | 0.54 | 0.50  | 0.47  | 0.46  | 0.47  | 0.47  | 0.40  | 0.36  |
| Russian Federation | G2884     | 1              | 1.00 | 0.99 | 0.98 | 0.95 | 0.92 | 0.88 | 0.84 | 0.81 | 0.78 | 0.75 | 0.69  | 0.62  | 0.57  | 0.51  | 0.47  | 0.37  | 0.31  |
| Russian Federation | G2885     | 1              | 0.95 | 0.80 | 0.73 | 0.68 | 0.59 | 0.54 | 0.51 | 0.48 | 0.43 | 0.40 | 0.36  | 0.32  | 0.29  | 0.29  | 0.25  | 0.24  | 0.20  |
| Russian Federation | G2886     | 1              | 1.00 | 1.00 | 0.99 | 0.97 | 0.94 | 0.90 | 0.86 | 0.82 | 0.77 | 0.72 | 0.63  | 0.56  | 0.51  | 0.48  | 0.44  | 0.41  | 0.34  |
| Russian Federation | G2890     | 1              | 0.99 | 0.98 | 0.97 | 0.95 | 0.93 | 0.91 | 0.88 | 0.85 | 0.83 | 0.81 | 0.76  | 0.73  | 0.69  | 0.66  | 0.63  | 0.57  | 0.52  |
| Russian Federation | G2891     | 1              | 1.00 | 1.00 | 1.00 | 0.99 | 0.98 | 0.96 | 0.93 | 0.91 | 0.88 | 0.85 | 0.80  | 0.76  | 0.72  | 0.68  | 0.63  | 0.51  | 0.42  |
| Russian Federation | G2892     | 1              | 1.00 | 1.00 | 0.99 | 0.99 | 0.99 | 0.97 | 0.95 | 0.92 | 0.89 | 0.87 | 0.82  | 0.77  | 0.74  | 0.69  | 0.65  | 0.52  | 0.43  |
| Russian Federation | G2897     | 1              | 1.00 | 0.98 | 0.93 | 0.85 | 0.75 | 0.65 | 0.55 | 0.47 | 0.40 | 0.35 | 0.26  | 0.21  | 0.18  | 0.16  | 0.17  | 0.18  | 0.16  |
| Russian Federation | G2898     | 1              | 0.99 | 0.97 | 0.93 | 0.88 | 0.81 | 0.75 | 0.70 | 0.65 | 0.61 | 0.59 | 0.54  | 0.50  | 0.46  | 0.45  | 0.42  | 0.39  | 0.34  |
| Russian Federation | G2899     | 1              | 1.00 | 0.97 | 0.92 | 0.87 | 0.81 | 0.73 | 0.66 | 0.60 | 0.54 | 0.49 | 0.42  | 0.33  | 0.29  | 0.25  | 0.21  | 0.16  | 0.12  |
| Russian Federation | G2900     | 1              | 1.00 | 0.99 | 0.96 | 0.92 | 0.87 | 0.81 | 0.75 | 0.68 | 0.62 | 0.55 | 0.41  | 0.28  | 0.15  | 0.05  | -0.04 | -0.22 | -0.29 |
| Russian Federation | G2901     | 1              | 1.00 | 1.00 | 1.00 | 0.99 | 0.99 | 0.99 | 0.98 | 0.98 | 0.97 | 0.97 | 0.96  | 0.93  | 0.91  | 0.88  | 0.85  | 0.77  | 0.67  |
| Russian Federation | G2902     | 1              | 1.00 | 1.00 | 1.00 | 1.00 | 0.99 | 0.98 | 0.97 | 0.95 | 0.92 | 0.89 | 0.83  | 0.77  | 0.71  | 0.66  | 0.60  | 0.49  | 0.37  |
| Russian Federation | G2903     | 1              | 1.00 | 1.00 | 1.00 | 0.99 | 0.99 | 0.98 | 0.96 | 0.94 | 0.91 | 0.87 | 0.80  | 0.73  | 0.67  | 0.62  | 0.57  | 0.44  | 0.33  |
| Russian Federation | G2906     | 1              | 1.00 | 1.00 | 0.99 | 0.98 | 0.97 | 0.96 | 0.94 | 0.91 | 0.88 | 0.84 | 0.74  | 0.61  | 0.45  | 0.33  | 0.24  | 0.14  | 0.10  |



| Country            | GloFAS ID | Station filter | LT1  | LT2  | LT3  | LT4  | LT5  | LT6  | LT7  | LT8  | LT9   | LT10  | LT12  | LT14  | LT16  | LT18  | LT20  | LT25  | L30   |
|--------------------|-----------|----------------|------|------|------|------|------|------|------|------|-------|-------|-------|-------|-------|-------|-------|-------|-------|
| Russian Federation | G2907     | 1              | 1.00 | 0.98 | 0.96 | 0.92 | 0.89 | 0.84 | 0.78 | 0.73 | 0.68  | 0.63  | 0.56  | 0.48  | 0.43  | 0.39  | 0.36  | 0.31  | 0.28  |
| Russian Federation | G2908     | 1              | 0.95 | 0.92 | 0.87 | 0.79 | 0.75 | 0.72 | 0.68 | 0.62 | 0.60  | 0.58  | 0.53  | 0.51  | 0.46  | 0.43  | 0.42  | 0.37  | 0.35  |
| Russian Federation | G2909     | 1              | 1.00 | 1.00 | 0.98 | 0.96 | 0.93 | 0.89 | 0.86 | 0.81 | 0.78  | 0.75  | 0.70  | 0.65  | 0.60  | 0.55  | 0.50  | 0.39  | 0.30  |
| Russian Federation | G2910     | 1              | 1.00 | 1.00 | 0.99 | 0.99 | 0.98 | 0.96 | 0.93 | 0.89 | 0.84  | 0.79  | 0.69  | 0.61  | 0.54  | 0.49  | 0.44  | 0.34  | 0.27  |
| Russian Federation | G2914     | 1              | 1.00 | 0.99 | 0.96 | 0.89 | 0.80 | 0.67 | 0.55 | 0.42 | 0.31  | 0.22  | 0.08  | -0.01 | -0.07 | -0.10 | -0.13 | -0.13 | -0.14 |
| Russian Federation | G2915     | 1              | 1.00 | 1.00 | 0.99 | 0.98 | 0.96 | 0.94 | 0.92 | 0.90 | 0.88  | 0.85  | 0.79  | 0.73  | 0.67  | 0.62  | 0.57  | 0.49  | 0.43  |
| Russian Federation | G2916     | 1              | 1.00 | 1.00 | 0.99 | 0.98 | 0.97 | 0.96 | 0.94 | 0.93 | 0.92  | 0.91  | 0.90  | 0.87  | 0.85  | 0.82  | 0.78  | 0.71  | 0.62  |
| Russian Federation | G2917     | 1              | 1.00 | 1.00 | 0.98 | 0.96 | 0.91 | 0.87 | 0.83 | 0.79 | 0.75  | 0.72  | 0.67  | 0.61  | 0.56  | 0.50  | 0.44  | 0.32  | 0.23  |
| Russian Federation | G2918     | 1              | 1.00 | 0.99 | 0.98 | 0.94 | 0.87 | 0.81 | 0.76 | 0.71 | 0.67  | 0.64  | 0.57  | 0.50  | 0.45  | 0.39  | 0.33  | 0.22  | 0.13  |
| Russian Federation | G2922     | 1              | 1.00 | 0.98 | 0.95 | 0.92 | 0.88 | 0.82 | 0.77 | 0.72 | 0.66  | 0.61  | 0.55  | 0.47  | 0.42  | 0.39  | 0.36  | 0.32  | 0.28  |
| Russian Federation | G2923     | 1              | 0.94 | 0.82 | 0.74 | 0.70 | 0.67 | 0.65 | 0.63 | 0.60 | 0.58  | 0.55  | 0.49  | 0.45  | 0.43  | 0.39  | 0.35  | 0.27  | 0.24  |
| Russian Federation | G2929     | 1              | 0.99 | 0.98 | 0.95 | 0.90 | 0.85 | 0.79 | 0.73 | 0.67 | 0.62  | 0.58  | 0.51  | 0.44  | 0.39  | 0.36  | 0.33  | 0.29  | 0.26  |
| Russian Federation | G2930     | 1              | 0.98 | 0.90 | 0.78 | 0.70 | 0.66 | 0.64 | 0.64 | 0.63 | 0.61  | 0.60  | 0.56  | 0.51  | 0.47  | 0.37  | 0.31  | 0.23  | 0.21  |
| Russian Federation | G2936     | 1              | 1.00 | 0.96 | 0.87 | 0.73 | 0.58 | 0.45 | 0.34 | 0.25 | 0.18  | 0.12  | 0.05  | 0.00  | -0.03 | -0.03 | -0.01 | -0.01 | -0.04 |
| Russian Federation | G2937     | 1              | 1.00 | 1.00 | 0.99 | 0.98 | 0.96 | 0.94 | 0.92 | 0.90 | 0.88  | 0.86  | 0.80  | 0.73  | 0.68  | 0.62  | 0.58  | 0.51  | 0.45  |
| Russian Federation | G2941     | 1              | 1.00 | 0.99 | 0.97 | 0.91 | 0.83 | 0.77 | 0.72 | 0.67 | 0.63  | 0.59  | 0.52  | 0.46  | 0.40  | 0.35  | 0.28  | 0.18  | 0.09  |
| Russian Federation | G2942     | 1              | 0.99 | 0.95 | 0.86 | 0.75 | 0.66 | 0.61 | 0.58 | 0.57 | 0.56  | 0.55  | 0.53  | 0.50  | 0.46  | 0.38  | 0.32  | 0.25  | 0.22  |
| Russian Federation | G2947     | 1              | 1.00 | 1.00 | 0.99 | 0.96 | 0.93 | 0.86 | 0.78 | 0.66 | 0.54  | 0.40  | 0.18  | 0.02  | -0.08 | -0.15 | -0.17 | -0.12 | -0.09 |
| Russian Federation | G2948     | 1              | 0.99 | 0.97 | 0.92 | 0.86 | 0.81 | 0.76 | 0.71 | 0.68 | 0.65  | 0.61  | 0.56  | 0.50  | 0.46  | 0.41  | 0.36  | 0.27  | 0.19  |
| Russian Federation | G2949     | 1              | 0.99 | 0.95 | 0.87 | 0.77 | 0.69 | 0.64 | 0.60 | 0.56 | 0.54  | 0.52  | 0.48  | 0.44  | 0.44  | 0.42  | 0.40  | 0.32  | 0.28  |
| Russian Federation | G2950     | 1              | 1.00 | 0.97 | 0.92 | 0.85 | 0.76 | 0.68 | 0.59 | 0.51 | 0.44  | 0.38  | 0.26  | 0.18  | 0.10  | 0.05  | 0.02  | -0.03 | -0.02 |
| Russian Federation | G2954     | 1              | 1.00 | 0.99 | 0.98 | 0.95 | 0.90 | 0.83 | 0.73 | 0.59 | 0.44  | 0.29  | 0.02  | -0.16 | -0.25 | -0.30 | -0.31 | -0.22 | -0.18 |
| Russian Federation | G2955     | 1              | 1.00 | 0.99 | 0.99 | 0.96 | 0.91 | 0.83 | 0.69 | 0.51 | 0.32  | 0.15  | -0.10 | -0.24 | -0.32 | -0.36 | -0.38 | -0.36 | -0.32 |
| Russian Federation | G2956     | 1              | 1.00 | 0.99 | 0.99 | 0.98 | 0.97 | 0.96 | 0.95 | 0.93 | 0.92  | 0.90  | 0.87  | 0.82  | 0.75  | 0.65  | 0.55  | 0.33  | 0.09  |
| Russian Federation | G2957     | 1              | 1.00 | 0.98 | 0.93 | 0.87 | 0.78 | 0.69 | 0.58 | 0.46 | 0.36  | 0.27  | 0.14  | 0.07  | 0.03  | 0.06  | 0.17  | 0.47  | 0.53  |
| Russian Federation | G2958     | 1              | 1.00 | 0.99 | 0.96 | 0.94 | 0.90 | 0.86 | 0.81 | 0.77 | 0.72  | 0.67  | 0.54  | 0.43  | 0.33  | 0.23  | 0.13  | -0.08 | -0.23 |
| Russian Federation | G2959     | 1              | 1.00 | 0.99 | 0.94 | 0.85 | 0.77 | 0.72 | 0.67 | 0.62 | 0.58  | 0.55  | 0.47  | 0.41  | 0.36  | 0.31  | 0.24  | 0.14  | 0.06  |
| Russian Federation | G2960     | 1              | 0.99 | 0.95 | 0.89 | 0.82 | 0.76 | 0.71 | 0.67 | 0.63 | 0.60  | 0.56  | 0.50  | 0.44  | 0.39  | 0.32  | 0.27  | 0.15  | 0.05  |
| Russian Federation | G2964     | 1              | 1.00 | 0.99 | 0.97 | 0.92 | 0.83 | 0.69 | 0.54 | 0.41 | 0.30  | 0.22  | 0.13  | 0.08  | 0.05  | 0.04  | 0.06  | 0.07  | 0.03  |
| Russian Federation | G2965     | 1              | 1.00 | 1.00 | 0.99 | 0.98 | 0.97 | 0.96 | 0.94 | 0.92 | 0.89  | 0.85  | 0.73  | 0.57  | 0.41  | 0.27  | 0.16  | 0.00  | -0.05 |
| Russian Federation | G2966     | 1              | 1.00 | 0.99 | 0.99 | 0.98 | 0.96 | 0.94 | 0.89 | 0.81 | 0.69  | 0.56  | 0.28  | 0.06  | -0.08 | -0.18 | -0.24 | -0.30 | -0.29 |
| Russian Federation | G2967     | 1              | 1.00 | 0.99 | 0.97 | 0.92 | 0.86 | 0.77 | 0.66 | 0.53 | 0.41  | 0.30  | 0.12  | 0.01  | -0.05 | -0.09 | -0.14 | -0.10 | -0.03 |
| Russian Federation | G2968     | 1              | 1.00 | 1.00 | 1.00 | 1.00 | 0.99 | 0.99 | 0.99 | 0.98 | 0.97  | 0.96  | 0.93  | 0.90  | 0.86  | 0.83  | 0.79  | 0.71  | 0.61  |
| Russian Federation | G2971     | 1              | 0.99 | 0.98 | 0.95 | 0.88 | 0.73 | 0.52 | 0.29 | 0.07 | -0.09 | -0.21 | -0.35 | -0.42 | -0.45 | -0.47 | -0.42 | -0.27 | -0.29 |
| Russian Federation | G2972     | 1              | 1.00 | 1.00 | 0.99 | 0.98 | 0.98 | 0.97 | 0.96 | 0.94 | 0.92  | 0.89  | 0.83  | 0.71  | 0.56  | 0.41  | 0.29  | 0.07  | -0.04 |
| Russian Federation | G2973     | 1              | 1.00 | 1.00 | 0.99 | 0.98 | 0.97 | 0.95 | 0.92 | 0.88 | 0.84  | 0.80  | 0.67  | 0.51  | 0.38  | 0.29  | 0.23  | 0.16  | 0.12  |
| Russian Federation | G2974     | 1              | 1.00 | 0.99 | 0.97 | 0.92 | 0.83 | 0.71 | 0.59 | 0.49 | 0.40  | 0.34  | 0.26  | 0.23  | 0.23  | 0.23  | 0.27  | 0.40  | 0.39  |
| Russian Federation | G2975     | 1              | 1.00 | 1.00 | 1.00 | 0.99 | 0.99 | 0.99 | 0.98 | 0.97 | 0.96  | 0.94  | 0.91  | 0.87  | 0.83  | 0.80  | 0.76  | 0.69  | 0.61  |
| Russian Federation | G2978     | 1              | 1.00 | 1.00 | 0.99 | 0.98 | 0.98 | 0.97 | 0.95 | 0.94 | 0.92  | 0.89  | 0.82  | 0.71  | 0.57  | 0.42  | 0.30  | 0.08  | -0.02 |



| Country            | GloFAS ID | Station filter | LT1  | LT2  | LT3  | LT4  | LT5  | LT6  | LT7   | LT8   | LT9   | LT10  | LT12  | LT14  | LT16  | LT18  | LT20  | LT25  | L30   |
|--------------------|-----------|----------------|------|------|------|------|------|------|-------|-------|-------|-------|-------|-------|-------|-------|-------|-------|-------|
| Russian Federation | G2979     | 1              | 1.00 | 1.00 | 0.99 | 0.99 | 0.98 | 0.96 | 0.94  | 0.91  | 0.88  | 0.83  | 0.69  | 0.52  | 0.39  | 0.30  | 0.24  | 0.15  | 0.10  |
| Russian Federation | G2980     | 1              | 1.00 | 1.00 | 1.00 | 1.00 | 0.99 | 0.99 | 0.99  | 0.98  | 0.97  | 0.97  | 0.95  | 0.93  | 0.90  | 0.86  | 0.82  | 0.72  | 0.58  |
| Russian Federation | G2985     | 1              | 1.00 | 0.96 | 0.82 | 0.55 | 0.26 | 0.02 | -0.15 | -0.27 | -0.36 | -0.42 | -0.50 | -0.55 | -0.58 | -0.57 | -0.52 | -0.50 | -0.54 |
| Russian Federation | G2986     | 1              | 1.00 | 0.99 | 0.99 | 0.97 | 0.95 | 0.93 | 0.90  | 0.87  | 0.82  | 0.77  | 0.65  | 0.52  | 0.42  | 0.34  | 0.27  | 0.12  | 0.10  |
| Russian Federation | G2987     | 1              | 1.00 | 1.00 | 0.99 | 0.99 | 0.98 | 0.97 | 0.95  | 0.94  | 0.93  | 0.91  | 0.88  | 0.84  | 0.77  | 0.68  | 0.59  | 0.36  | 0.12  |
| Russian Federation | G2988     | 1              | 1.00 | 0.99 | 0.96 | 0.92 | 0.86 | 0.81 | 0.74  | 0.66  | 0.58  | 0.51  | 0.35  | 0.21  | 0.10  | 0.00  | -0.06 | -0.16 | -0.19 |
| Russian Federation | G2989     | 1              | 1.00 | 1.00 | 1.00 | 1.00 | 1.00 | 0.99 | 0.99  | 0.99  | 0.98  | 0.98  | 0.97  | 0.95  | 0.93  | 0.90  | 0.87  | 0.79  | 0.66  |
| Russian Federation | G2990     | 1              | 1.00 | 1.00 | 0.99 | 0.97 | 0.93 | 0.88 | 0.82  | 0.77  | 0.71  | 0.66  | 0.59  | 0.54  | 0.50  | 0.46  | 0.42  | 0.36  | 0.29  |
| Russian Federation | G2994     | 1              | 1.00 | 0.98 | 0.94 | 0.88 | 0.79 | 0.68 | 0.55  | 0.43  | 0.33  | 0.24  | 0.11  | 0.03  | 0.00  | -0.10 | -0.19 | -0.04 | 0.02  |
| Russian Federation | G2995     | 1              | 0.98 | 0.92 | 0.84 | 0.74 | 0.61 | 0.49 | 0.37  | 0.25  | 0.14  | 0.05  | -0.12 | -0.26 | -0.34 | -0.42 | -0.49 | -0.60 | -0.66 |
| Russian Federation | G2996     | 1              | 1.00 | 1.00 | 1.00 | 0.99 | 0.98 | 0.97 | 0.96  | 0.94  | 0.92  | 0.89  | 0.84  | 0.78  | 0.72  | 0.65  | 0.59  | 0.45  | 0.31  |
| Russian Federation | G2999     | 1              | 1.00 | 0.95 | 0.71 | 0.38 | 0.14 | 0.00 | -0.09 | -0.14 | -0.17 | -0.19 | -0.21 | -0.23 | -0.23 | -0.13 | 0.01  | 0.02  | -0.02 |
| Russian Federation | G3000     | 1              | 1.00 | 1.00 | 0.99 | 0.99 | 0.98 | 0.97 | 0.96  | 0.95  | 0.94  | 0.93  | 0.90  | 0.85  | 0.78  | 0.68  | 0.59  | 0.35  | 0.10  |
| Russian Federation | G3001     | 1              | 1.00 | 0.98 | 0.95 | 0.88 | 0.78 | 0.65 | 0.54  | 0.44  | 0.37  | 0.31  | 0.25  | 0.21  | 0.19  | 0.21  | 0.33  | 0.51  | 0.49  |
| Russian Federation | G3002     | 1              | 1.00 | 0.97 | 0.90 | 0.79 | 0.63 | 0.45 | 0.28  | 0.13  | 0.01  | -0.08 | -0.20 | -0.25 | -0.27 | -0.25 | -0.16 | 0.16  | 0.21  |
| Russian Federation | G3003     | 1              | 1.00 | 1.00 | 0.99 | 0.98 | 0.95 | 0.92 | 0.87  | 0.80  | 0.72  | 0.63  | 0.43  | 0.25  | 0.12  | 0.03  | -0.03 | -0.10 | -0.02 |
| Russian Federation | G3004     | 1              | 1.00 | 0.98 | 0.93 | 0.86 | 0.76 | 0.66 | 0.57  | 0.50  | 0.43  | 0.38  | 0.30  | 0.25  | 0.21  | 0.17  | 0.14  | 0.08  | 0.03  |
| Russian Federation | G3005     | 1              | 1.00 | 0.99 | 0.99 | 0.97 | 0.95 | 0.92 | 0.88  | 0.82  | 0.76  | 0.71  | 0.63  | 0.55  | 0.48  | 0.44  | 0.39  | 0.28  | 0.22  |
| Russian Federation | G3008     | 1              | 0.99 | 0.96 | 0.89 | 0.79 | 0.67 | 0.54 | 0.42  | 0.31  | 0.24  | 0.19  | 0.11  | 0.08  | 0.08  | 0.14  | 0.31  | 0.56  | 0.53  |
| Russian Federation | G3009     | 1              | 0.99 | 0.98 | 0.94 | 0.87 | 0.78 | 0.66 | 0.53  | 0.40  | 0.29  | 0.19  | 0.05  | -0.03 | -0.08 | -0.12 | -0.18 | -0.01 | 0.06  |
| Russian Federation | G3010     | 1              | 1.00 | 1.00 | 0.99 | 0.97 | 0.94 | 0.90 | 0.85  | 0.78  | 0.71  | 0.63  | 0.47  | 0.33  | 0.22  | 0.15  | 0.10  | 0.10  | 0.15  |
| Russian Federation | G3011     | 1              | 0.99 | 0.97 | 0.92 | 0.83 | 0.72 | 0.63 | 0.56  | 0.51  | 0.48  | 0.46  | 0.43  | 0.41  | 0.40  | 0.40  | 0.39  | 0.32  | 0.29  |
| Russian Federation | G3012     | 1              | 1.00 | 1.00 | 0.99 | 0.99 | 0.98 | 0.96 | 0.95  | 0.93  | 0.90  | 0.87  | 0.81  | 0.75  | 0.69  | 0.65  | 0.61  | 0.54  | 0.49  |
| Russian Federation | G3016     | 1              | 1.00 | 1.00 | 0.99 | 0.97 | 0.95 | 0.92 | 0.88  | 0.82  | 0.75  | 0.67  | 0.49  | 0.31  | 0.14  | -0.01 | -0.10 | -0.05 | 0.05  |
| Russian Federation | G3017     | 1              | 1.00 | 1.00 | 0.99 | 0.99 | 0.98 | 0.97 | 0.96  | 0.95  | 0.94  | 0.93  | 0.90  | 0.85  | 0.77  | 0.67  | 0.58  | 0.33  | 0.08  |
| Russian Federation | G3018     | 1              | 0.99 | 0.94 | 0.77 | 0.52 | 0.28 | 0.09 | -0.05 | -0.16 | -0.21 | -0.24 | -0.28 | -0.29 | -0.29 | -0.06 | 0.19  | 0.33  | 0.33  |
| Russian Federation | G3019     | 1              | 1.00 | 0.97 | 0.91 | 0.83 | 0.75 | 0.68 | 0.61  | 0.54  | 0.46  | 0.39  | 0.26  | 0.16  | 0.10  | 0.07  | 0.07  | 0.06  | 0.01  |
| Russian Federation | G3020     | 1              | 1.00 | 1.00 | 1.00 | 0.99 | 0.99 | 0.98 | 0.97  | 0.95  | 0.91  | 0.86  | 0.71  | 0.58  | 0.49  | 0.43  | 0.37  | 0.26  | 0.14  |
| Russian Federation | G3021     | 1              | 1.00 | 1.00 | 0.99 | 0.97 | 0.96 | 0.94 | 0.92  | 0.89  | 0.87  | 0.84  | 0.79  | 0.73  | 0.67  | 0.62  | 0.56  | 0.41  | 0.28  |
| Russian Federation | G3022     | 1              | 1.00 | 1.00 | 0.99 | 0.97 | 0.94 | 0.90 | 0.84  | 0.77  | 0.68  | 0.59  | 0.40  | 0.25  | 0.15  | 0.08  | 0.04  | 0.08  | 0.12  |
| Russian Federation | G3023     | 1              | 0.99 | 0.93 | 0.70 | 0.43 | 0.21 | 0.07 | -0.02 | -0.07 | -0.10 | -0.12 | -0.12 | -0.12 | -0.09 | -0.04 | 0.01  | 0.06  | 0.12  |
| Russian Federation | G3024     | 1              | 1.00 | 0.98 | 0.93 | 0.85 | 0.76 | 0.65 | 0.55  | 0.47  | 0.40  | 0.34  | 0.23  | 0.13  | 0.07  | 0.03  | 0.00  | -0.08 | -0.14 |
| Russian Federation | G3025     | 1              | 0.99 | 0.94 | 0.86 | 0.76 | 0.67 | 0.58 | 0.52  | 0.47  | 0.43  | 0.41  | 0.37  | 0.34  | 0.32  | 0.31  | 0.30  | 0.28  | 0.26  |
| Russian Federation | G3026     | 1              | 0.99 | 0.94 | 0.86 | 0.78 | 0.72 | 0.67 | 0.62  | 0.58  | 0.55  | 0.52  | 0.45  | 0.39  | 0.34  | 0.28  | 0.22  | 0.12  | 0.06  |
| Russian Federation | G3027     | 1              | 1.00 | 1.00 | 0.99 | 0.99 | 0.98 | 0.97 | 0.97  | 0.96  | 0.95  | 0.94  | 0.92  | 0.90  | 0.86  | 0.81  | 0.76  | 0.59  | 0.43  |
| Russian Federation | G3028     | 1              | 0.98 | 0.91 | 0.84 | 0.79 | 0.73 | 0.69 | 0.68  | 0.64  | 0.62  | 0.60  | 0.58  | 0.57  | 0.56  | 0.54  | 0.54  | 0.52  | 0.50  |
| Russian Federation | G3029     | 1              | 0.99 | 0.97 | 0.93 | 0.87 | 0.81 | 0.76 | 0.71  | 0.67  | 0.65  | 0.63  | 0.56  | 0.51  | 0.48  | 0.46  | 0.43  | 0.38  | 0.32  |
| Russian Federation | G3033     | 1              | 1.00 | 0.98 | 0.92 | 0.79 | 0.59 | 0.39 | 0.20  | 0.06  | -0.04 | -0.11 | -0.19 | -0.23 | -0.26 | -0.27 | -0.23 | -0.18 | -0.21 |
| Russian Federation | G3034     | 1              | 0.98 | 0.91 | 0.70 | 0.46 | 0.27 | 0.13 | 0.05  | 0.00  | -0.03 | -0.05 | -0.05 | -0.05 | -0.04 | 0.21  | 0.44  | 0.36  | 0.30  |

| Country            | GloFAS ID | Station filter | LT1  | LT2  | LT3  | LT4  | LT5  | LT6   | LT7   | LT8   | LT9   | LT10  | LT12  | LT14  | LT16  | LT18  | LT20  | LT25  | L30   |
|--------------------|-----------|----------------|------|------|------|------|------|-------|-------|-------|-------|-------|-------|-------|-------|-------|-------|-------|-------|
| Russian Federation | G3035     | 1              | 1.00 | 0.98 | 0.94 | 0.87 | 0.77 | 0.66  | 0.54  | 0.43  | 0.34  | 0.26  | 0.14  | 0.06  | 0.02  | 0.00  | 0.02  | 0.01  | -0.02 |
| Russian Federation | G3036     | 1              | 0.99 | 0.93 | 0.78 | 0.61 | 0.46 | 0.34  | 0.25  | 0.17  | 0.12  | 0.07  | 0.01  | -0.04 | -0.08 | -0.12 | -0.14 | -0.19 | -0.24 |
| Russian Federation | G3037     | 1              | 1.00 | 1.00 | 1.00 | 0.99 | 0.99 | 0.98  | 0.98  | 0.97  | 0.96  | 0.95  | 0.93  | 0.90  | 0.88  | 0.85  | 0.82  | 0.75  | 0.71  |
| Russian Federation | G3038     | 1              | 1.00 | 1.00 | 0.99 | 0.99 | 0.98 | 0.97  | 0.96  | 0.95  | 0.94  | 0.93  | 0.90  | 0.86  | 0.82  | 0.79  | 0.77  | 0.74  | 0.72  |
| Russian Federation | G3039     | 1              | 0.98 | 0.88 | 0.77 | 0.69 | 0.63 | 0.58  | 0.54  | 0.51  | 0.47  | 0.43  | 0.38  | 0.34  | 0.31  | 0.26  | 0.23  | 0.14  | 0.07  |
| Russian Federation | G3040     | 1              | 1.00 | 0.97 | 0.93 | 0.86 | 0.79 | 0.74  | 0.69  | 0.66  | 0.63  | 0.60  | 0.54  | 0.50  | 0.46  | 0.40  | 0.36  | 0.27  | 0.19  |
| Russian Federation | G3041     | 1              | 0.99 | 0.98 | 0.96 | 0.95 | 0.93 | 0.91  | 0.89  | 0.86  | 0.84  | 0.81  | 0.77  | 0.73  | 0.69  | 0.65  | 0.61  | 0.49  | 0.36  |
| Russian Federation | G3042     | 1              | 1.00 | 0.98 | 0.96 | 0.94 | 0.93 | 0.91  | 0.88  | 0.86  | 0.83  | 0.81  | 0.77  | 0.73  | 0.69  | 0.65  | 0.61  | 0.49  | 0.37  |
| Russian Federation | G3043     | 1              | 1.00 | 0.99 | 0.96 | 0.92 | 0.87 | 0.81  | 0.75  | 0.70  | 0.66  | 0.63  | 0.58  | 0.52  | 0.47  | 0.44  | 0.39  | 0.27  | 0.18  |
| Russian Federation | G3044     | 1              | 1.00 | 0.99 | 0.98 | 0.97 | 0.93 | 0.88  | 0.81  | 0.74  | 0.69  | 0.64  | 0.55  | 0.49  | 0.43  | 0.38  | 0.34  | 0.23  | 0.17  |
| Russian Federation | G3046     | 1              | 1.00 | 0.97 | 0.89 | 0.77 | 0.62 | 0.45  | 0.29  | 0.17  | 0.07  | 0.01  | -0.07 | -0.12 | -0.15 | -0.13 | -0.09 | -0.04 | -0.05 |
| Russian Federation | G3047     | 1              | 0.99 | 0.98 | 0.93 | 0.85 | 0.74 | 0.61  | 0.49  | 0.38  | 0.29  | 0.21  | 0.09  | 0.03  | -0.01 | -0.03 | -0.01 | 0.02  | 0.00  |
| Russian Federation | G3048     | 1              | 1.00 | 1.00 | 1.00 | 0.99 | 0.98 | 0.97  | 0.96  | 0.95  | 0.94  | 0.92  | 0.90  | 0.87  | 0.84  | 0.82  | 0.79  | 0.72  | 0.67  |
| Russian Federation | G3049     | 1              | 1.00 | 0.98 | 0.92 | 0.78 | 0.61 | 0.43  | 0.26  | 0.10  | -0.04 | -0.15 | -0.31 | -0.39 | -0.46 | -0.51 | -0.55 | -0.64 | -0.72 |
| Russian Federation | G3050     | 1              | 1.00 | 1.00 | 1.00 | 0.99 | 0.98 | 0.98  | 0.97  | 0.96  | 0.95  | 0.94  | 0.92  | 0.89  | 0.86  | 0.84  | 0.80  | 0.74  | 0.69  |
| Russian Federation | G3053     | 1              | 0.99 | 0.92 | 0.70 | 0.44 | 0.18 | -0.04 | -0.20 | -0.33 | -0.44 | -0.52 | -0.63 | -0.71 | -0.76 | -0.79 | -0.80 | -0.84 | -0.88 |
| Russian Federation | G3054     | 1              | 1.00 | 1.00 | 0.99 | 0.99 | 0.98 | 0.97  | 0.95  | 0.92  | 0.90  | 0.87  | 0.80  | 0.75  | 0.70  | 0.66  | 0.62  | 0.56  | 0.51  |
| Russian Federation | G3055     | 1              | 1.00 | 1.00 | 1.00 | 0.99 | 0.99 | 0.98  | 0.97  | 0.96  | 0.95  | 0.94  | 0.91  | 0.89  | 0.86  | 0.84  | 0.81  | 0.74  | 0.69  |
| Russian Federation | G3059     | 1              | 1.00 | 1.00 | 0.99 | 0.99 | 0.98 | 0.97  | 0.94  | 0.89  | 0.81  | 0.73  | 0.60  | 0.52  | 0.44  | 0.39  | 0.34  | 0.23  | 0.11  |
| Russian Federation | G3060     | 1              | 0.99 | 0.97 | 0.90 | 0.78 | 0.62 | 0.40  | 0.11  | -0.18 | -0.44 | -0.67 | -1.03 | -1.24 | -1.35 | -1.44 | -1.54 | -1.68 | -1.78 |
| Russian Federation | G3061     | 1              | 1.00 | 1.00 | 1.00 | 0.99 | 0.99 | 0.99  | 0.98  | 0.97  | 0.97  | 0.95  | 0.93  | 0.91  | 0.88  | 0.84  | 0.81  | 0.75  | 0.72  |
| Russian Federation | G3062     | 1              | 0.99 | 0.97 | 0.92 | 0.83 | 0.76 | 0.71  | 0.66  | 0.62  | 0.61  | 0.60  | 0.53  | 0.49  | 0.47  | 0.45  | 0.42  | 0.38  | 0.33  |
| Russian Federation | G3065     | 1              | 1.00 | 0.98 | 0.95 | 0.89 | 0.79 | 0.69  | 0.60  | 0.53  | 0.48  | 0.43  | 0.37  | 0.34  | 0.32  | 0.29  | 0.24  | 0.18  | 0.16  |
| Russian Federation | G3066     | 1              | 0.99 | 0.96 | 0.88 | 0.76 | 0.62 | 0.45  | 0.28  | 0.15  | 0.04  | -0.05 | -0.16 | -0.24 | -0.29 | -0.33 | -0.36 | -0.43 | -0.48 |
| Russian Federation | G3067     | 1              | 1.00 | 1.00 | 1.00 | 1.00 | 0.99 | 0.99  | 0.99  | 0.98  | 0.98  | 0.97  | 0.95  | 0.92  | 0.88  | 0.84  | 0.80  | 0.69  | 0.56  |
| Russian Federation | G3068     | 1              | 1.00 | 1.00 | 1.00 | 0.99 | 0.98 | 0.98  | 0.97  | 0.96  | 0.95  | 0.94  | 0.91  | 0.88  | 0.84  | 0.80  | 0.76  | 0.64  | 0.52  |
| Russian Federation | G3069     | 1              | 1.00 | 1.00 | 1.00 | 0.99 | 0.99 | 0.98  | 0.97  | 0.95  | 0.94  | 0.92  | 0.89  | 0.86  | 0.84  | 0.81  | 0.78  | 0.71  | 0.63  |
| Russian Federation | G3070     | 1              | 1.00 | 1.00 | 0.99 | 0.98 | 0.96 | 0.92  | 0.89  | 0.85  | 0.80  | 0.76  | 0.67  | 0.60  | 0.53  | 0.48  | 0.43  | 0.32  | 0.22  |
| Russian Federation | G3071     | 1              | 0.98 | 0.92 | 0.82 | 0.74 | 0.67 | 0.61  | 0.59  | 0.58  | 0.57  | 0.53  | 0.48  | 0.43  | 0.43  | 0.38  | 0.34  | 0.29  | 0.24  |
| Russian Federation | G3075     | 1              | 1.00 | 0.99 | 0.96 | 0.92 | 0.87 | 0.83  | 0.78  | 0.74  | 0.70  | 0.67  | 0.61  | 0.55  | 0.50  | 0.44  | 0.35  | 0.21  | 0.12  |
| Russian Federation | G3076     | 1              | 1.00 | 1.00 | 0.99 | 0.96 | 0.93 | 0.88  | 0.82  | 0.77  | 0.72  | 0.67  | 0.59  | 0.53  | 0.47  | 0.42  | 0.32  | 0.14  | 0.05  |
| Russian Federation | G3077     | 1              | 1.00 | 0.99 | 0.98 | 0.96 | 0.91 | 0.86  | 0.80  | 0.74  | 0.68  | 0.63  | 0.54  | 0.48  | 0.43  | 0.40  | 0.37  | 0.29  | 0.23  |
| Russian Federation | G3078     | 1              | 1.00 | 1.00 | 1.00 | 0.99 | 0.98 | 0.97  | 0.95  | 0.92  | 0.89  | 0.86  | 0.78  | 0.71  | 0.64  | 0.57  | 0.51  | 0.38  | 0.28  |
| Russian Federation | G3081     | 1              | 0.99 | 0.94 | 0.87 | 0.78 | 0.68 | 0.60  | 0.55  | 0.51  | 0.47  | 0.44  | 0.42  | 0.40  | 0.38  | 0.33  | 0.27  | 0.21  | 0.19  |
| Russian Federation | G3083     | 1              | 1.00 | 1.00 | 0.99 | 0.98 | 0.97 | 0.96  | 0.95  | 0.93  | 0.92  | 0.90  | 0.86  | 0.82  | 0.76  | 0.71  | 0.66  | 0.46  | 0.24  |
| Russian Federation | G3084     | 1              | 1.00 | 0.96 | 0.87 | 0.74 | 0.60 | 0.49  | 0.41  | 0.36  | 0.31  | 0.28  | 0.24  | 0.21  | 0.18  | 0.18  | 0.21  | 0.20  | 0.18  |
| Russian Federation | G3085     | 1              | 1.00 | 0.99 | 0.97 | 0.94 | 0.89 | 0.82  | 0.74  | 0.68  | 0.63  | 0.60  | 0.53  | 0.48  | 0.43  | 0.39  | 0.34  | 0.29  | 0.21  |
| Russian Federation | G3088     | 1              | 1.00 | 1.00 | 1.00 | 0.99 | 0.99 | 0.99  | 0.98  | 0.96  | 0.95  | 0.92  | 0.84  | 0.69  | 0.51  | 0.32  | 0.13  | -0.19 | -0.26 |
| Russian Federation | G3089     | 1              | 1.00 | 0.98 | 0.95 | 0.89 | 0.80 | 0.71  | 0.64  | 0.57  | 0.49  | 0.43  | 0.37  | 0.32  | 0.28  | 0.28  | 0.31  | 0.26  | 0.21  |

| Country            | GloFAS ID | Station filter | LT1  | LT2  | LT3  | LT4  | LT5  | LT6  | LT7  | LT8  | LT9   | LT10  | LT12  | LT14  | LT16  | LT18  | LT20  | LT25  | L30   |
|--------------------|-----------|----------------|------|------|------|------|------|------|------|------|-------|-------|-------|-------|-------|-------|-------|-------|-------|
| Russian Federation | G3090     | 1              | 1.00 | 1.00 | 0.99 | 0.99 | 0.98 | 0.97 | 0.96 | 0.95 | 0.94  | 0.93  | 0.91  | 0.88  | 0.86  | 0.83  | 0.81  | 0.73  | 0.63  |
| Russian Federation | G3091     | 1              | 1.00 | 1.00 | 0.99 | 0.98 | 0.96 | 0.93 | 0.90 | 0.86 | 0.82  | 0.79  | 0.71  | 0.64  | 0.57  | 0.52  | 0.46  | 0.34  | 0.24  |
| Russian Federation | G3094     | 1              | 1.00 | 1.00 | 1.00 | 0.99 | 0.99 | 0.99 | 0.98 | 0.98 | 0.97  | 0.96  | 0.90  | 0.80  | 0.66  | 0.52  | 0.39  | 0.12  | -0.05 |
| Russian Federation | G3095     | 1              | 1.00 | 0.99 | 0.98 | 0.96 | 0.94 | 0.91 | 0.88 | 0.85 | 0.81  | 0.76  | 0.65  | 0.51  | 0.39  | 0.28  | 0.21  | 0.09  | 0.00  |
| Russian Federation | G3096     | 1              | 0.99 | 0.95 | 0.87 | 0.75 | 0.65 | 0.59 | 0.56 | 0.53 | 0.50  | 0.47  | 0.42  | 0.38  | 0.34  | 0.30  | 0.25  | 0.23  | 0.14  |
| Russian Federation | G3098     | 1              | 1.00 | 1.00 | 0.99 | 0.98 | 0.96 | 0.95 | 0.93 | 0.90 | 0.87  | 0.81  | 0.63  | 0.43  | 0.26  | 0.14  | 0.05  | -0.08 | -0.16 |
| Russian Federation | G3099     | 1              | 1.00 | 1.00 | 0.99 | 0.99 | 0.98 | 0.97 | 0.97 | 0.96 | 0.94  | 0.93  | 0.89  | 0.84  | 0.79  | 0.77  | 0.74  | 0.71  | 0.69  |
| Russian Federation | G3100     | 1              | 0.99 | 0.95 | 0.86 | 0.74 | 0.64 | 0.57 | 0.51 | 0.45 | 0.41  | 0.38  | 0.33  | 0.30  | 0.26  | 0.22  | 0.17  | 0.11  | 0.04  |
| Russian Federation | G3101     | 1              | 1.00 | 0.99 | 0.95 | 0.89 | 0.82 | 0.74 | 0.69 | 0.64 | 0.60  | 0.56  | 0.49  | 0.43  | 0.38  | 0.33  | 0.28  | 0.22  | 0.14  |
| Russian Federation | G3105     | 1              | 1.00 | 1.00 | 0.99 | 0.98 | 0.94 | 0.89 | 0.79 | 0.67 | 0.55  | 0.43  | 0.21  | 0.05  | -0.05 | -0.11 | -0.13 | -0.07 | -0.07 |
| Russian Federation | G3106     | 1              | 1.00 | 0.98 | 0.93 | 0.86 | 0.76 | 0.66 | 0.57 | 0.50 | 0.45  | 0.42  | 0.36  | 0.33  | 0.32  | 0.23  | 0.16  | 0.10  | 0.08  |
| Russian Federation | G3107     | 1              | 0.99 | 0.97 | 0.90 | 0.80 | 0.72 | 0.65 | 0.60 | 0.56 | 0.54  | 0.52  | 0.49  | 0.47  | 0.45  | 0.41  | 0.36  | 0.30  | 0.27  |
| Russian Federation | G3108     | 1              | 1.00 | 0.97 | 0.93 | 0.84 | 0.72 | 0.64 | 0.57 | 0.51 | 0.47  | 0.43  | 0.38  | 0.34  | 0.30  | 0.26  | 0.20  | 0.14  | 0.09  |
| Russian Federation | G3109     | 1              | 1.00 | 0.98 | 0.95 | 0.89 | 0.82 | 0.75 | 0.69 | 0.64 | 0.60  | 0.56  | 0.49  | 0.44  | 0.39  | 0.34  | 0.29  | 0.24  | 0.15  |
| Russian Federation | G3110     | 1              | 1.00 | 1.00 | 0.99 | 0.97 | 0.93 | 0.85 | 0.72 | 0.56 | 0.40  | 0.26  | 0.03  | -0.14 | -0.26 | -0.33 | -0.37 | -0.41 | -0.44 |
| Russian Federation | G3111     | 1              | 1.00 | 0.99 | 0.99 | 0.98 | 0.97 | 0.96 | 0.95 | 0.94 | 0.93  | 0.91  | 0.89  | 0.86  | 0.83  | 0.78  | 0.71  | 0.42  | 0.28  |
| Russian Federation | G3112     | 1              | 1.00 | 1.00 | 0.98 | 0.95 | 0.90 | 0.81 | 0.71 | 0.62 | 0.53  | 0.45  | 0.29  | 0.14  | -0.01 | -0.15 | -0.27 | -0.49 | -0.65 |
| Russian Federation | G3113     | 1              | 0.99 | 0.97 | 0.92 | 0.85 | 0.77 | 0.68 | 0.59 | 0.53 | 0.46  | 0.41  | 0.34  | 0.27  | 0.24  | 0.21  | 0.18  | 0.15  | 0.11  |
| Russian Federation | G3114     | 1              | 0.99 | 0.92 | 0.79 | 0.67 | 0.58 | 0.53 | 0.49 | 0.45 | 0.41  | 0.39  | 0.34  | 0.31  | 0.29  | 0.22  | 0.18  | 0.14  | 0.09  |
| Russian Federation | G3116     | 1              | 1.00 | 1.00 | 1.00 | 0.99 | 0.97 | 0.94 | 0.87 | 0.79 | 0.72  | 0.67  | 0.59  | 0.53  | 0.48  | 0.44  | 0.40  | 0.32  | 0.22  |
| Russian Federation | G3119     | 1              | 1.00 | 1.00 | 1.00 | 0.99 | 0.99 | 0.99 | 0.98 | 0.98 | 0.96  | 0.92  | 0.76  | 0.54  | 0.36  | 0.19  | 0.05  | -0.17 | -0.23 |
| Russian Federation | G3120     | 1              | 1.00 | 1.00 | 0.99 | 0.99 | 0.98 | 0.98 | 0.97 | 0.96 | 0.94  | 0.93  | 0.90  | 0.88  | 0.84  | 0.77  | 0.67  | 0.39  | 0.28  |
| Russian Federation | G3121     | 1              | 1.00 | 0.98 | 0.96 | 0.91 | 0.86 | 0.81 | 0.73 | 0.65 | 0.57  | 0.50  | 0.37  | 0.29  | 0.21  | 0.15  | 0.12  | 0.02  | -0.02 |
| Russian Federation | G3122     | 1              | 1.00 | 0.98 | 0.91 | 0.76 | 0.55 | 0.33 | 0.17 | 0.06 | -0.02 | -0.09 | -0.18 | -0.23 | -0.27 | -0.32 | -0.37 | -0.47 | -0.54 |
| Russian Federation | G3123     | 1              | 0.99 | 0.97 | 0.93 | 0.87 | 0.79 | 0.70 | 0.60 | 0.49 | 0.37  | 0.26  | 0.05  | -0.11 | -0.21 | -0.27 | -0.31 | -0.38 | -0.43 |
| Russian Federation | G3124     | 1              | 1.00 | 0.99 | 0.96 | 0.91 | 0.84 | 0.77 | 0.72 | 0.68 | 0.65  | 0.62  | 0.58  | 0.53  | 0.48  | 0.44  | 0.38  | 0.28  | 0.20  |
| Russian Federation | G3125     | 1              | 1.00 | 0.98 | 0.95 | 0.89 | 0.82 | 0.75 | 0.70 | 0.66 | 0.63  | 0.61  | 0.56  | 0.51  | 0.47  | 0.43  | 0.37  | 0.27  | 0.19  |
| Russian Federation | G3126     | 1              | 0.99 | 0.95 | 0.90 | 0.83 | 0.77 | 0.70 | 0.64 | 0.60 | 0.56  | 0.53  | 0.47  | 0.42  | 0.39  | 0.35  | 0.29  | 0.20  | 0.12  |
| Russian Federation | G3128     | 1              | 1.00 | 1.00 | 0.99 | 0.99 | 0.99 | 0.98 | 0.97 | 0.94 | 0.88  | 0.79  | 0.56  | 0.36  | 0.19  | 0.04  | -0.07 | -0.19 | -0.18 |
| Russian Federation | G3129     | 1              | 1.00 | 1.00 | 0.99 | 0.99 | 0.98 | 0.98 | 0.97 | 0.95 | 0.92  | 0.88  | 0.78  | 0.71  | 0.62  | 0.52  | 0.45  | 0.28  | 0.14  |
| Russian Federation | G3130     | 1              | 1.00 | 0.97 | 0.91 | 0.81 | 0.70 | 0.59 | 0.49 | 0.39 | 0.30  | 0.23  | 0.10  | -0.02 | -0.12 | -0.25 | -0.40 | -0.62 | -0.74 |
| Russian Federation | G3131     | 1              | 1.00 | 0.99 | 0.96 | 0.91 | 0.84 | 0.76 | 0.66 | 0.55 | 0.41  | 0.26  | -0.08 | -0.39 | -0.63 | -0.79 | -0.90 | -1.13 | -1.36 |
| Russian Federation | G3132     | 1              | 0.99 | 0.97 | 0.92 | 0.84 | 0.76 | 0.69 | 0.64 | 0.60 | 0.57  | 0.54  | 0.49  | 0.44  | 0.41  | 0.38  | 0.33  | 0.24  | 0.16  |
| Russian Federation | G3133     | 1              | 0.99 | 0.95 | 0.89 | 0.82 | 0.75 | 0.69 | 0.66 | 0.62 | 0.60  | 0.58  | 0.54  | 0.50  | 0.47  | 0.44  | 0.39  | 0.30  | 0.24  |
| Russian Federation | G3137     | 1              | 1.00 | 0.99 | 0.99 | 0.98 | 0.97 | 0.95 | 0.93 | 0.89 | 0.86  | 0.81  | 0.66  | 0.38  | 0.12  | -0.07 | -0.25 | -0.50 | -0.64 |
| Russian Federation | G3138     | 1              | 0.99 | 0.95 | 0.89 | 0.80 | 0.72 | 0.65 | 0.60 | 0.56 | 0.53  | 0.49  | 0.44  | 0.40  | 0.37  | 0.33  | 0.27  | 0.18  | 0.10  |
| Russian Federation | G3143     | 1              | 1.00 | 1.00 | 0.99 | 0.99 | 0.99 | 0.98 | 0.97 | 0.96 | 0.95  | 0.93  | 0.91  | 0.88  | 0.83  | 0.76  | 0.64  | 0.38  | 0.29  |
| Russian Federation | G3144     | 1              | 1.00 | 0.99 | 0.97 | 0.91 | 0.83 | 0.73 | 0.63 | 0.54 | 0.46  | 0.38  | 0.22  | 0.05  | -0.10 | -0.24 | -0.36 | -0.57 | -0.73 |
| Russian Federation | G3145     | 1              | 1.00 | 1.00 | 0.99 | 0.97 | 0.94 | 0.90 | 0.84 | 0.78 | 0.70  | 0.61  | 0.37  | 0.10  | -0.16 | -0.40 | -0.59 | -0.93 | -1.14 |

| Country            | GloFAS ID | Station filter | LT1  | LT2  | LT3  | LT4  | LT5  | LT6  | LT7   | LT8   | LT9   | LT10  | LT12  | LT14  | LT16  | LT18  | LT20  | LT25  | L30   |
|--------------------|-----------|----------------|------|------|------|------|------|------|-------|-------|-------|-------|-------|-------|-------|-------|-------|-------|-------|
| Russian Federation | G3146     | 1              | 0.99 | 0.95 | 0.90 | 0.84 | 0.78 | 0.70 | 0.64  | 0.59  | 0.55  | 0.52  | 0.46  | 0.41  | 0.37  | 0.33  | 0.28  | 0.19  | 0.13  |
| Russian Federation | G3151     | 1              | 1.00 | 0.97 | 0.87 | 0.72 | 0.58 | 0.46 | 0.38  | 0.31  | 0.26  | 0.23  | 0.18  | 0.13  | 0.09  | 0.04  | 0.00  | -0.08 | -0.17 |
| Russian Federation | G3152     | 1              | 1.00 | 0.99 | 0.94 | 0.82 | 0.67 | 0.51 | 0.39  | 0.30  | 0.23  | 0.18  | 0.11  | 0.06  | 0.02  | -0.01 | -0.03 | -0.10 | -0.18 |
| Russian Federation | G3153     | 1              | 1.00 | 0.99 | 0.96 | 0.86 | 0.71 | 0.50 | 0.30  | 0.13  | 0.00  | -0.11 | -0.26 | -0.35 | -0.42 | -0.46 | -0.49 | -0.51 | -0.56 |
| Russian Federation | G3154     | 1              | 1.00 | 1.00 | 0.99 | 0.96 | 0.91 | 0.82 | 0.72  | 0.62  | 0.53  | 0.45  | 0.34  | 0.26  | 0.21  | 0.17  | 0.15  | 0.07  | 0.02  |
| Russian Federation | G3155     | 1              | 0.98 | 0.90 | 0.78 | 0.68 | 0.61 | 0.56 | 0.53  | 0.51  | 0.50  | 0.48  | 0.44  | 0.41  | 0.38  | 0.32  | 0.26  | 0.19  | 0.11  |
| Russian Federation | G3156     | 1              | 1.00 | 1.00 | 1.00 | 0.99 | 0.99 | 0.99 | 0.99  | 0.98  | 0.97  | 0.95  | 0.89  | 0.83  | 0.77  | 0.72  | 0.68  | 0.58  | 0.45  |
| Russian Federation | G3157     | 1              | 1.00 | 1.00 | 0.99 | 0.97 | 0.91 | 0.77 | 0.59  | 0.43  | 0.31  | 0.23  | 0.12  | 0.06  | 0.03  | 0.00  | -0.02 | -0.07 | -0.13 |
| Russian Federation | G3158     | 1              | 1.00 | 0.98 | 0.91 | 0.78 | 0.64 | 0.53 | 0.45  | 0.39  | 0.35  | 0.32  | 0.27  | 0.24  | 0.20  | 0.17  | 0.16  | 0.09  | 0.01  |
| Russian Federation | G3159     | 1              | 1.00 | 0.99 | 0.95 | 0.87 | 0.75 | 0.57 | 0.35  | 0.12  | -0.09 | -0.27 | -0.55 | -0.73 | -0.86 | -0.96 | -1.03 | -1.17 | -1.28 |
| Russian Federation | G3160     | 1              | 1.00 | 0.98 | 0.97 | 0.95 | 0.92 | 0.88 | 0.83  | 0.78  | 0.71  | 0.64  | 0.53  | 0.43  | 0.35  | 0.28  | 0.21  | 0.09  | -0.03 |
| Russian Federation | G3162     | 1              | 1.00 | 1.00 | 0.99 | 0.98 | 0.98 | 0.97 | 0.95  | 0.94  | 0.92  | 0.90  | 0.87  | 0.84  | 0.81  | 0.77  | 0.72  | 0.58  | 0.37  |
| Russian Federation | G3163     | 1              | 0.97 | 0.89 | 0.79 | 0.68 | 0.62 | 0.57 | 0.54  | 0.52  | 0.50  | 0.48  | 0.45  | 0.42  | 0.38  | 0.33  | 0.31  | 0.23  | 0.16  |
| Russian Federation | G3165     | 1              | 1.00 | 1.00 | 1.00 | 0.99 | 0.99 | 0.99 | 0.98  | 0.97  | 0.96  | 0.95  | 0.92  | 0.89  | 0.84  | 0.75  | 0.61  | 0.37  | 0.29  |
| Russian Federation | G3166     | 1              | 1.00 | 1.00 | 0.99 | 0.96 | 0.92 | 0.87 | 0.81  | 0.75  | 0.69  | 0.63  | 0.52  | 0.45  | 0.39  | 0.36  | 0.33  | 0.27  | 0.22  |
| Russian Federation | G3167     | 1              | 0.99 | 0.97 | 0.92 | 0.88 | 0.83 | 0.79 | 0.75  | 0.72  | 0.69  | 0.65  | 0.62  | 0.57  | 0.52  | 0.47  | 0.44  | 0.37  | 0.31  |
| Russian Federation | G3168     | 1              | 0.99 | 0.95 | 0.87 | 0.79 | 0.73 | 0.69 | 0.67  | 0.64  | 0.62  | 0.60  | 0.56  | 0.52  | 0.48  | 0.42  | 0.36  | 0.28  | 0.22  |
| Russian Federation | G3170     | 1              | 1.00 | 1.00 | 0.99 | 0.98 | 0.97 | 0.95 | 0.93  | 0.91  | 0.89  | 0.86  | 0.83  | 0.80  | 0.79  | 0.77  | 0.76  | 0.71  | 0.67  |
| Russian Federation | G3171     | 1              | 1.00 | 0.99 | 0.97 | 0.93 | 0.84 | 0.70 | 0.52  | 0.34  | 0.19  | 0.07  | -0.10 | -0.21 | -0.27 | -0.32 | -0.35 | -0.43 | -0.47 |
| Russian Federation | G3172     | 1              | 1.00 | 0.99 | 0.96 | 0.93 | 0.90 | 0.85 | 0.79  | 0.73  | 0.68  | 0.62  | 0.51  | 0.43  | 0.36  | 0.30  | 0.25  | 0.14  | 0.07  |
| Russian Federation | G3173     | 1              | 0.99 | 0.97 | 0.94 | 0.90 | 0.85 | 0.79 | 0.76  | 0.73  | 0.70  | 0.67  | 0.62  | 0.57  | 0.52  | 0.47  | 0.43  | 0.34  | 0.26  |
| Russian Federation | G3174     | 1              | 0.94 | 0.75 | 0.54 | 0.37 | 0.25 | 0.17 | 0.11  | 0.06  | 0.03  | -0.01 | -0.04 | -0.09 | -0.16 | -0.33 | -0.40 | -0.47 | -0.55 |
| Russian Federation | G3176     | 1              | 0.99 | 0.97 | 0.93 | 0.88 | 0.80 | 0.72 | 0.64  | 0.58  | 0.53  | 0.47  | 0.37  | 0.28  | 0.20  | 0.07  | -0.12 | -0.42 | -0.49 |
| Russian Federation | G3181     | 1              | 1.00 | 1.00 | 0.98 | 0.89 | 0.69 | 0.34 | -0.02 | -0.30 | -0.49 | -0.63 | -0.81 | -0.92 | -1.00 | -1.00 | -0.87 | -0.64 | -0.66 |
| Russian Federation | G3182     | 1              | 1.00 | 0.99 | 0.97 | 0.96 | 0.94 | 0.92 | 0.90  | 0.89  | 0.87  | 0.85  | 0.81  | 0.77  | 0.73  | 0.69  | 0.66  | 0.58  | 0.49  |
| Russian Federation | G3188     | 1              | 0.99 | 0.96 | 0.92 | 0.87 | 0.83 | 0.80 | 0.77  | 0.73  | 0.70  | 0.67  | 0.62  | 0.57  | 0.53  | 0.49  | 0.46  | 0.38  | 0.31  |
| Russian Federation | G3189     | 1              | 1.00 | 0.99 | 0.96 | 0.91 | 0.85 | 0.77 | 0.64  | 0.45  | 0.29  | 0.16  | -0.01 | -0.11 | -0.18 | -0.23 | -0.19 | -0.06 | -0.10 |
| Russian Federation | G3197     | 1              | 1.00 | 0.99 | 0.99 | 0.97 | 0.95 | 0.91 | 0.87  | 0.78  | 0.65  | 0.47  | 0.09  | -0.17 | -0.35 | -0.49 | -0.58 | -0.55 | -0.52 |
| Russian Federation | G3198     | 1              | 0.99 | 0.99 | 0.98 | 0.97 | 0.95 | 0.91 | 0.86  | 0.80  | 0.74  | 0.67  | 0.55  | 0.48  | 0.41  | 0.36  | 0.32  | 0.28  | 0.24  |
| Russian Federation | G3203     | 1              | 1.00 | 0.99 | 0.98 | 0.95 | 0.90 | 0.86 | 0.81  | 0.77  | 0.73  | 0.68  | 0.60  | 0.55  | 0.51  | 0.46  | 0.40  | 0.29  | 0.24  |
| Russian Federation | G3206     | 1              | 1.00 | 0.98 | 0.92 | 0.74 | 0.48 | 0.23 | 0.04  | -0.09 | -0.19 | -0.27 | -0.38 | -0.46 | -0.51 | -0.56 | -0.63 | -0.76 | -0.86 |
| Russian Federation | G3207     | 1              | 1.00 | 0.98 | 0.94 | 0.90 | 0.86 | 0.82 | 0.78  | 0.75  | 0.73  | 0.71  | 0.67  | 0.64  | 0.62  | 0.60  | 0.57  | 0.55  | 0.51  |
| Russian Federation | G3214     | 1              | 1.00 | 0.97 | 0.93 | 0.87 | 0.80 | 0.74 | 0.66  | 0.60  | 0.55  | 0.50  | 0.41  | 0.34  | 0.29  | 0.25  | 0.22  | 0.19  | 0.15  |
| Russian Federation | G3215     | 1              | 1.00 | 1.00 | 0.99 | 0.98 | 0.96 | 0.94 | 0.90  | 0.84  | 0.79  | 0.73  | 0.65  | 0.59  | 0.52  | 0.45  | 0.36  | 0.21  | 0.09  |
| Russian Federation | G3216     | 1              | 0.97 | 0.90 | 0.80 | 0.70 | 0.61 | 0.52 | 0.44  | 0.37  | 0.30  | 0.24  | 0.12  | 0.01  | -0.11 | -0.35 | -0.55 | -0.75 | -0.82 |
| Russian Federation | G3220     | 1              | 0.99 | 0.97 | 0.93 | 0.88 | 0.82 | 0.75 | 0.70  | 0.65  | 0.59  | 0.53  | 0.45  | 0.38  | 0.32  | 0.27  | 0.23  | 0.18  | 0.15  |
| Russian Federation | G3221     | 1              | 0.99 | 0.93 | 0.74 | 0.49 | 0.29 | 0.13 | 0.02  | -0.06 | -0.12 | -0.19 | -0.27 | -0.32 | -0.36 | -0.43 | -0.46 | -0.55 | -0.58 |
| Russian Federation | G3222     | 1              | 0.99 | 0.95 | 0.84 | 0.71 | 0.59 | 0.50 | 0.43  | 0.38  | 0.33  | 0.30  | 0.25  | 0.22  | 0.20  | 0.16  | 0.14  | 0.09  | 0.06  |
| Russian Federation | G3232     | 1              | 0.99 | 0.93 | 0.83 | 0.72 | 0.63 | 0.57 | 0.53  | 0.50  | 0.47  | 0.45  | 0.40  | 0.37  | 0.35  | 0.33  | 0.30  | 0.25  | 0.22  |

| Country            | GloFAS ID | Station filter | LT1  | LT2  | LT3  | LT4  | LT5   | LT6   | LT7   | LT8   | LT9   | LT10  | LT12  | LT14  | LT16  | LT18  | LT20  | LT25  | L30   |
|--------------------|-----------|----------------|------|------|------|------|-------|-------|-------|-------|-------|-------|-------|-------|-------|-------|-------|-------|-------|
| Russian Federation | G3236     | 1              | 1.00 | 0.96 | 0.88 | 0.78 | 0.68  | 0.60  | 0.54  | 0.50  | 0.46  | 0.43  | 0.38  | 0.35  | 0.33  | 0.30  | 0.27  | 0.20  | 0.17  |
| Russian Federation | G3237     | 1              | 1.00 | 0.99 | 0.98 | 0.96 | 0.94  | 0.90  | 0.86  | 0.83  | 0.79  | 0.74  | 0.67  | 0.60  | 0.54  | 0.49  | 0.45  | 0.38  | 0.31  |
| Russian Federation | G3240     | 1              | 1.00 | 1.00 | 0.99 | 0.98 | 0.96  | 0.94  | 0.92  | 0.90  | 0.87  | 0.84  | 0.79  | 0.74  | 0.70  | 0.66  | 0.63  | 0.54  | 0.45  |
| Russian Federation | G3241     | 1              | 1.00 | 1.00 | 0.99 | 0.98 | 0.97  | 0.95  | 0.92  | 0.90  | 0.87  | 0.84  | 0.78  | 0.73  | 0.68  | 0.65  | 0.61  | 0.54  | 0.47  |
| Russian Federation | G3242     | 1              | 0.98 | 0.93 | 0.86 | 0.79 | 0.74  | 0.69  | 0.66  | 0.63  | 0.59  | 0.56  | 0.52  | 0.48  | 0.44  | 0.39  | 0.36  | 0.27  | 0.19  |
| Russian Federation | G3248     | 1              | 1.00 | 1.00 | 0.99 | 0.99 | 0.98  | 0.97  | 0.95  | 0.93  | 0.92  | 0.90  | 0.86  | 0.82  | 0.79  | 0.76  | 0.73  | 0.67  | 0.60  |
| Russian Federation | G3249     | 1              | 0.99 | 0.96 | 0.90 | 0.85 | 0.79  | 0.76  | 0.71  | 0.68  | 0.64  | 0.61  | 0.56  | 0.51  | 0.47  | 0.44  | 0.42  | 0.35  | 0.31  |
| Russian Federation | G3252     | 1              | 1.00 | 1.00 | 0.99 | 0.97 | 0.95  | 0.92  | 0.89  | 0.85  | 0.81  | 0.78  | 0.71  | 0.66  | 0.61  | 0.57  | 0.54  | 0.45  | 0.37  |
| Russian Federation | G3258     | 1              | 1.00 | 1.00 | 0.99 | 0.99 | 0.98  | 0.98  | 0.97  | 0.96  | 0.96  | 0.95  | 0.93  | 0.91  | 0.88  | 0.86  | 0.84  | 0.78  | 0.72  |
| Russian Federation | G3263     | 1              | 1.00 | 1.00 | 0.99 | 0.98 | 0.97  | 0.96  | 0.94  | 0.90  | 0.86  | 0.83  | 0.75  | 0.66  | 0.58  | 0.52  | 0.45  | 0.29  | 0.20  |
| Russian Federation | G3264     | 1              | 1.00 | 0.99 | 0.97 | 0.93 | 0.80  | 0.50  | -0.02 | -0.68 | -1.33 | -1.87 | -2.54 | -2.87 | -3.06 | -3.23 | -3.37 | -3.64 | -3.75 |
| Russian Federation | G3265     | 1              | 1.00 | 0.98 | 0.94 | 0.88 | 0.79  | 0.69  | 0.58  | 0.50  | 0.43  | 0.37  | 0.27  | 0.16  | 0.08  | 0.01  | -0.03 | -0.16 | -0.23 |
| Russian Federation | G3269     | 1              | 1.00 | 1.00 | 0.99 | 0.99 | 0.98  | 0.98  | 0.97  | 0.97  | 0.96  | 0.96  | 0.93  | 0.84  | 0.68  | 0.52  | 0.43  | 0.33  | 0.29  |
| Russian Federation | G3270     | 1              | 1.00 | 1.00 | 1.00 | 1.00 | 1.00  | 0.99  | 0.98  | 0.96  | 0.94  | 0.92  | 0.87  | 0.82  | 0.77  | 0.73  | 0.69  | 0.57  | 0.45  |
| Russian Federation | G3271     | 1              | 1.00 | 1.00 | 0.99 | 0.98 | 0.96  | 0.94  | 0.90  | 0.85  | 0.80  | 0.74  | 0.63  | 0.54  | 0.44  | 0.36  | 0.30  | 0.18  | 0.08  |
| Russian Federation | G3272     | 1              | 1.00 | 0.99 | 0.97 | 0.93 | 0.89  | 0.85  | 0.82  | 0.79  | 0.76  | 0.73  | 0.69  | 0.64  | 0.60  | 0.57  | 0.54  | 0.47  | 0.38  |
| Russian Federation | G3276     | 1              | 0.99 | 0.96 | 0.93 | 0.88 | 0.79  | 0.70  | 0.62  | 0.55  | 0.50  | 0.47  | 0.41  | 0.36  | 0.31  | 0.27  | 0.25  | 0.19  | 0.16  |
| Russian Federation | G3277     | 1              | 1.00 | 1.00 | 0.99 | 0.98 | 0.95  | 0.93  | 0.89  | 0.86  | 0.83  | 0.80  | 0.76  | 0.72  | 0.69  | 0.66  | 0.63  | 0.57  | 0.51  |
| Russian Federation | G3283     | 1              | 1.00 | 0.99 | 0.99 | 0.98 | 0.97  | 0.96  | 0.95  | 0.93  | 0.91  | 0.89  | 0.85  | 0.80  | 0.76  | 0.71  | 0.67  | 0.57  | 0.48  |
| Russian Federation | G3284     | 1              | 1.00 | 1.00 | 0.99 | 0.98 | 0.96  | 0.93  | 0.89  | 0.85  | 0.80  | 0.75  | 0.67  | 0.56  | 0.51  | 0.47  | 0.44  | 0.32  | 0.22  |
| Russian Federation | G3288     | 1              | 1.00 | 1.00 | 1.00 | 1.00 | 0.99  | 0.99  | 0.99  | 0.98  | 0.98  | 0.97  | 0.96  | 0.95  | 0.93  | 0.91  | 0.89  | 0.84  | 0.78  |
| Russian Federation | G3289     | 1              | 1.00 | 0.98 | 0.95 | 0.91 | 0.87  | 0.83  | 0.79  | 0.74  | 0.70  | 0.67  | 0.61  | 0.56  | 0.53  | 0.49  | 0.44  | 0.34  | 0.26  |
| Russian Federation | G3292     | 1              | 0.99 | 0.98 | 0.93 | 0.87 | 0.81  | 0.75  | 0.70  | 0.64  | 0.59  | 0.55  | 0.47  | 0.42  | 0.37  | 0.33  | 0.30  | 0.24  | 0.19  |
| Russian Federation | G3293     | 1              | 1.00 | 0.98 | 0.96 | 0.94 | 0.92  | 0.91  | 0.88  | 0.84  | 0.83  | 0.80  | 0.72  | 0.66  | 0.57  | 0.51  | 0.44  | 0.33  | 0.25  |
| Russian Federation | G3294     | 1              | 1.00 | 0.99 | 0.98 | 0.96 | 0.94  | 0.91  | 0.88  | 0.85  | 0.81  | 0.78  | 0.71  | 0.63  | 0.58  | 0.53  | 0.48  | 0.39  | 0.33  |
| Russian Federation | G3295     | 1              | 0.99 | 0.98 | 0.95 | 0.92 | 0.88  | 0.85  | 0.81  | 0.77  | 0.73  | 0.69  | 0.64  | 0.59  | 0.55  | 0.51  | 0.46  | 0.38  | 0.30  |
| Russian Federation | G3308     | 1              | 0.99 | 0.97 | 0.92 | 0.87 | 0.82  | 0.77  | 0.74  | 0.70  | 0.67  | 0.64  | 0.60  | 0.57  | 0.53  | 0.49  | 0.46  | 0.39  | 0.34  |
| Russian Federation | G3310     | 1              | 1.00 | 0.99 | 0.96 | 0.92 | 0.88  | 0.84  | 0.75  | 0.69  | 0.65  | 0.59  | 0.51  | 0.44  | 0.39  | 0.34  | 0.29  | 0.20  | 0.13  |
| Russian Federation | G3311     | 1              | 0.99 | 0.94 | 0.88 | 0.83 | 0.78  | 0.73  | 0.70  | 0.68  | 0.65  | 0.63  | 0.60  | 0.56  | 0.52  | 0.49  | 0.47  | 0.41  | 0.37  |
| Russian Federation | G3312     | 1              | 0.97 | 0.93 | 0.87 | 0.82 | 0.77  | 0.74  | 0.70  | 0.67  | 0.64  | 0.62  | 0.56  | 0.53  | 0.48  | 0.44  | 0.42  | 0.33  | 0.28  |
| Russian Federation | G3313     | 1              | 0.99 | 0.97 | 0.93 | 0.89 | 0.84  | 0.80  | 0.77  | 0.74  | 0.70  | 0.67  | 0.64  | 0.61  | 0.57  | 0.53  | 0.49  | 0.42  | 0.36  |
| Russian Federation | G3319     | 1              | 0.98 | 0.88 | 0.80 | 0.73 | 0.65  | 0.59  | 0.54  | 0.51  | 0.45  | 0.42  | 0.38  | 0.34  | 0.31  | 0.31  | 0.27  | 0.23  | 0.20  |
| Russian Federation | G3320     | 1              | 0.99 | 0.90 | 0.69 | 0.47 | 0.32  | 0.22  | 0.13  | 0.07  | 0.02  | -0.02 | -0.07 | -0.10 | -0.12 | -0.17 | -0.19 | -0.24 | -0.28 |
| Russian Federation | G3321     | 1              | 0.99 | 0.95 | 0.83 | 0.67 | 0.51  | 0.38  | 0.29  | 0.23  | 0.18  | 0.14  | 0.08  | 0.05  | 0.02  | -0.03 | -0.08 | -0.12 | -0.12 |
| Russian Federation | G3324     | 1              | 1.00 | 0.94 | 0.77 | 0.57 | 0.43  | 0.33  | 0.26  | 0.22  | 0.18  | 0.16  | 0.12  | 0.10  | 0.07  | 0.05  | 0.02  | -0.03 | -0.08 |
| Russian Federation | G3325     | 1              | 0.98 | 0.86 | 0.68 | 0.55 | 0.45  | 0.39  | 0.34  | 0.31  | 0.28  | 0.26  | 0.21  | 0.18  | 0.15  | 0.13  | 0.09  | 0.04  | -0.01 |
| Russian Federation | G3326     | 1              | 1.00 | 0.99 | 0.97 | 0.95 | 0.92  | 0.89  | 0.85  | 0.80  | 0.76  | 0.71  | 0.64  | 0.58  | 0.53  | 0.50  | 0.49  | 0.50  | 0.52  |
| Russian Federation | G3330     | 1              | 1.00 | 0.99 | 0.98 | 0.92 | 0.80  | 0.56  | 0.19  | -0.23 | -0.59 | -0.86 | -1.18 | -1.33 | -1.44 | -1.53 | -1.57 | -1.62 | -1.66 |
| Russian Federation | G3331     | 1              | 1.00 | 0.93 | 0.63 | 0.25 | -0.03 | -0.21 | -0.32 | -0.39 | -0.45 | -0.48 | -0.51 | -0.52 | -0.51 | -0.50 | -0.50 | -0.53 | -0.55 |

| Country            | GloFAS ID | Station filter | LT1  | LT2  | LT3  | LT4  | LT5  | LT6  | LT7  | LT8  | LT9  | LT10 | LT12 | LT14 | LT16  | LT18  | LT20  | LT25  | L30   |
|--------------------|-----------|----------------|------|------|------|------|------|------|------|------|------|------|------|------|-------|-------|-------|-------|-------|
| Russian Federation | G3332     | 1              | 0.99 | 0.90 | 0.68 | 0.47 | 0.34 | 0.24 | 0.19 | 0.15 | 0.12 | 0.10 | 0.08 | 0.06 | 0.05  | 0.04  | 0.01  | -0.03 | -0.07 |
| Russian Federation | G3333     | 1              | 0.99 | 0.94 | 0.84 | 0.73 | 0.63 | 0.55 | 0.48 | 0.43 | 0.39 | 0.36 | 0.31 | 0.25 | 0.21  | 0.20  | 0.21  | 0.19  | 0.18  |
| Russian Federation | G3334     | 1              | 0.97 | 0.90 | 0.84 | 0.79 | 0.76 | 0.71 | 0.69 | 0.68 | 0.65 | 0.64 | 0.61 | 0.58 | 0.55  | 0.54  | 0.49  | 0.44  | 0.39  |
| Russian Federation | G3338     | 1              | 1.00 | 1.00 | 0.99 | 0.99 | 0.98 | 0.96 | 0.94 | 0.92 | 0.90 | 0.86 | 0.78 | 0.70 | 0.63  | 0.55  | 0.49  | 0.36  | 0.31  |
| Russian Federation | G3339     | 1              | 0.98 | 0.94 | 0.88 | 0.80 | 0.72 | 0.65 | 0.59 | 0.55 | 0.52 | 0.48 | 0.37 | 0.31 | 0.27  | 0.23  | 0.22  | 0.19  | 0.18  |
| Russian Federation | G3340     | 1              | 0.97 | 0.88 | 0.79 | 0.72 | 0.67 | 0.63 | 0.60 | 0.58 | 0.56 | 0.54 | 0.50 | 0.46 | 0.43  | 0.42  | 0.39  | 0.33  | 0.31  |
| Russian Federation | G3345     | 1              | 1.00 | 1.00 | 0.99 | 0.98 | 0.94 | 0.86 | 0.77 | 0.69 | 0.61 | 0.55 | 0.45 | 0.38 | 0.32  | 0.27  | 0.22  | 0.15  | 0.14  |
| Russian Federation | G3346     | 1              | 1.00 | 1.00 | 1.00 | 0.99 | 0.99 | 0.98 | 0.97 | 0.96 | 0.95 | 0.94 | 0.91 | 0.87 | 0.84  | 0.79  | 0.75  | 0.65  | 0.58  |
| Russian Federation | G3347     | 1              | 0.99 | 0.97 | 0.94 | 0.90 | 0.86 | 0.81 | 0.77 | 0.75 | 0.73 | 0.70 | 0.65 | 0.62 | 0.60  | 0.58  | 0.56  | 0.51  | 0.47  |
| Russian Federation | G3348     | 1              | 0.99 | 0.95 | 0.89 | 0.83 | 0.78 | 0.74 | 0.71 | 0.69 | 0.67 | 0.65 | 0.61 | 0.58 | 0.56  | 0.57  | 0.58  | 0.55  | 0.52  |
| Russian Federation | G3349     | 1              | 0.99 | 0.96 | 0.90 | 0.84 | 0.79 | 0.74 | 0.71 | 0.69 | 0.67 | 0.65 | 0.61 | 0.57 | 0.55  | 0.54  | 0.55  | 0.51  | 0.49  |
| Russian Federation | G3350     | 1              | 0.98 | 0.93 | 0.86 | 0.82 | 0.78 | 0.74 | 0.71 | 0.69 | 0.67 | 0.65 | 0.62 | 0.59 | 0.56  | 0.54  | 0.53  | 0.47  | 0.43  |
| Russian Federation | G3351     | 1              | 1.00 | 0.99 | 0.98 | 0.98 | 0.97 | 0.97 | 0.96 | 0.96 | 0.96 | 0.95 | 0.95 | 0.94 | 0.93  | 0.92  | 0.91  | 0.89  | 0.87  |
| Russian Federation | G3353     | 1              | 1.00 | 0.99 | 0.97 | 0.94 | 0.91 | 0.87 | 0.83 | 0.79 | 0.75 | 0.71 | 0.64 | 0.59 | 0.53  | 0.48  | 0.41  | 0.35  | 0.28  |
| Russian Federation | G3354     | 1              | 0.99 | 0.94 | 0.86 | 0.78 | 0.72 | 0.67 | 0.65 | 0.62 | 0.60 | 0.58 | 0.54 | 0.52 | 0.50  | 0.53  | 0.56  | 0.55  | 0.53  |
| Russian Federation | G3357     | 1              | 1.00 | 1.00 | 0.99 | 0.97 | 0.91 | 0.83 | 0.73 | 0.65 | 0.58 | 0.52 | 0.43 | 0.36 | 0.30  | 0.26  | 0.21  | 0.15  | 0.14  |
| Russian Federation | G3360     | 1              | 0.94 | 0.85 | 0.77 | 0.71 | 0.65 | 0.60 | 0.59 | 0.57 | 0.53 | 0.52 | 0.50 | 0.49 | 0.45  | 0.45  | 0.43  | 0.39  | 0.35  |
| Russian Federation | G3361     | 1              | 0.96 | 0.91 | 0.87 | 0.83 | 0.79 | 0.77 | 0.75 | 0.71 | 0.69 | 0.67 | 0.62 | 0.61 | 0.59  | 0.58  | 0.56  | 0.52  | 0.49  |
| Russian Federation | G3362     | 1              | 0.99 | 0.97 | 0.95 | 0.93 | 0.92 | 0.90 | 0.89 | 0.88 | 0.87 | 0.86 | 0.85 | 0.83 | 0.81  | 0.80  | 0.79  | 0.76  | 0.73  |
| Russian Federation | G3363     | 1              | 0.97 | 0.93 | 0.89 | 0.86 | 0.82 | 0.80 | 0.79 | 0.77 | 0.75 | 0.74 | 0.71 | 0.70 | 0.67  | 0.66  | 0.65  | 0.61  | 0.57  |
| Russian Federation | G3364     | 1              | 1.00 | 1.00 | 0.99 | 0.97 | 0.95 | 0.93 | 0.91 | 0.88 | 0.86 | 0.84 | 0.80 | 0.75 | 0.68  | 0.60  | 0.50  | 0.27  | 0.08  |
| Russian Federation | G3365     | 1              | 1.00 | 1.00 | 1.00 | 1.00 | 1.00 | 1.00 | 0.99 | 0.99 | 0.98 | 0.97 | 0.93 | 0.87 | 0.79  | 0.72  | 0.65  | 0.52  | 0.43  |
| Russian Federation | G3368     | 1              | 0.99 | 0.98 | 0.96 | 0.94 | 0.89 | 0.82 | 0.77 | 0.68 | 0.55 | 0.45 | 0.27 | 0.11 | -0.01 | -0.08 | -0.14 | -0.15 | -0.14 |
| Russian Federation | G3369     | 1              | 1.00 | 0.98 | 0.92 | 0.81 | 0.67 | 0.56 | 0.48 | 0.41 | 0.38 | 0.37 | 0.32 | 0.30 | 0.27  | 0.25  | 0.23  | 0.20  | 0.19  |
| Russian Federation | G3370     | 1              | 1.00 | 0.99 | 0.98 | 0.95 | 0.92 | 0.89 | 0.87 | 0.85 | 0.84 | 0.83 | 0.81 | 0.80 | 0.79  | 0.79  | 0.79  | 0.79  | 0.78  |
| Russian Federation | G3371     | 1              | 0.99 | 0.98 | 0.95 | 0.91 | 0.86 | 0.81 | 0.78 | 0.76 | 0.74 | 0.71 | 0.66 | 0.63 | 0.61  | 0.59  | 0.58  | 0.53  | 0.49  |
| Russian Federation | G3372     | 1              | 0.99 | 0.94 | 0.86 | 0.79 | 0.73 | 0.69 | 0.66 | 0.63 | 0.61 | 0.59 | 0.55 | 0.53 | 0.51  | 0.54  | 0.57  | 0.56  | 0.53  |
| Russian Federation | G3376     | 1              | 1.00 | 1.00 | 0.98 | 0.94 | 0.85 | 0.75 | 0.66 | 0.59 | 0.53 | 0.48 | 0.40 | 0.34 | 0.28  | 0.23  | 0.20  | 0.14  | 0.14  |
| Russian Federation | G3377     | 1              | 0.98 | 0.88 | 0.73 | 0.61 | 0.52 | 0.44 | 0.39 | 0.34 | 0.31 | 0.28 | 0.22 | 0.18 | 0.16  | 0.16  | 0.14  | 0.14  | 0.15  |
| Russian Federation | G3379     | 1              | 0.99 | 0.94 | 0.82 | 0.70 | 0.60 | 0.52 | 0.46 | 0.42 | 0.38 | 0.35 | 0.29 | 0.25 | 0.23  | 0.24  | 0.26  | 0.24  | 0.23  |
| Russian Federation | G3380     | 1              | 1.00 | 1.00 | 0.98 | 0.96 | 0.93 | 0.91 | 0.89 | 0.88 | 0.87 | 0.86 | 0.85 | 0.84 | 0.83  | 0.83  | 0.83  | 0.84  | 0.82  |
| Russian Federation | G3386     | 1              | 1.00 | 0.98 | 0.89 | 0.77 | 0.68 | 0.61 | 0.56 | 0.51 | 0.48 | 0.45 | 0.40 | 0.35 | 0.32  | 0.29  | 0.28  | 0.24  | 0.21  |
| Russian Federation | G3387     | 1              | 0.99 | 0.91 | 0.74 | 0.54 | 0.40 | 0.31 | 0.27 | 0.26 | 0.25 | 0.23 | 0.21 | 0.17 | 0.16  | 0.16  | 0.17  | 0.08  | 0.08  |
| Russian Federation | G3388     | 1              | 0.96 | 0.90 | 0.84 | 0.79 | 0.73 | 0.72 | 0.69 | 0.65 | 0.64 | 0.63 | 0.59 | 0.58 | 0.56  | 0.57  | 0.56  | 0.52  | 0.49  |
| Russian Federation | G3391     | 1              | 1.00 | 0.97 | 0.89 | 0.77 | 0.66 | 0.58 | 0.51 | 0.46 | 0.41 | 0.36 | 0.29 | 0.23 | 0.18  | 0.16  | 0.16  | 0.13  | 0.13  |
| Russian Federation | G3392     | 1              | 1.00 | 0.95 | 0.82 | 0.69 | 0.57 | 0.48 | 0.40 | 0.34 | 0.28 | 0.23 | 0.15 | 0.08 | 0.04  | 0.03  | 0.04  | 0.03  | 0.04  |
| Russian Federation | G3393     | 1              | 0.98 | 0.90 | 0.81 | 0.72 | 0.62 | 0.54 | 0.49 | 0.43 | 0.39 | 0.36 | 0.33 | 0.26 | 0.23  | 0.22  | 0.22  | 0.23  | 0.22  |
| Russian Federation | G3394     | 1              | 0.98 | 0.94 | 0.87 | 0.80 | 0.74 | 0.70 | 0.65 | 0.61 | 0.58 | 0.56 | 0.51 | 0.48 | 0.43  | 0.39  | 0.35  | 0.30  | 0.23  |
| Russian Federation | G3396     | 1              | 1.00 | 1.00 | 0.97 | 0.90 | 0.79 | 0.69 | 0.60 | 0.53 | 0.47 | 0.43 | 0.34 | 0.28 | 0.23  | 0.19  | 0.17  | 0.14  | 0.14  |

| Country            | GloFAS ID | Station filter | LT1  | LT2  | LT3  | LT4  | LT5  | LT6  | LT7  | LT8  | LT9  | LT10 | LT12 | LT14 | LT16 | LT18  | LT20  | LT25  | L30   |
|--------------------|-----------|----------------|------|------|------|------|------|------|------|------|------|------|------|------|------|-------|-------|-------|-------|
| Russian Federation | G3397     | 1              | 1.00 | 0.99 | 0.97 | 0.95 | 0.92 | 0.91 | 0.89 | 0.87 | 0.87 | 0.86 | 0.85 | 0.84 | 0.84 | 0.83  | 0.84  | 0.84  | 0.83  |
| Russian Federation | G3398     | 1              | 1.00 | 0.99 | 0.97 | 0.92 | 0.86 | 0.79 | 0.71 | 0.64 | 0.58 | 0.53 | 0.44 | 0.37 | 0.32 | 0.26  | 0.21  | 0.12  | 0.06  |
| Russian Federation | G3400     | 1              | 1.00 | 0.99 | 0.96 | 0.85 | 0.68 | 0.48 | 0.32 | 0.22 | 0.16 | 0.11 | 0.06 | 0.04 | 0.01 | -0.03 | -0.04 | -0.03 | -0.04 |
| Russian Federation | G3401     | 1              | 1.00 | 0.95 | 0.83 | 0.67 | 0.53 | 0.41 | 0.31 | 0.23 | 0.19 | 0.14 | 0.09 | 0.04 | 0.02 | 0.01  | 0.08  | 0.12  | 0.11  |
| Russian Federation | G3402     | 1              | 1.00 | 1.00 | 1.00 | 1.00 | 1.00 | 1.00 | 1.00 | 1.00 | 0.99 | 0.99 | 0.99 | 0.99 | 0.98 | 0.98  | 0.97  | 0.96  | 0.95  |
| Russian Federation | G3403     | 1              | 1.00 | 0.99 | 0.99 | 0.98 | 0.98 | 0.97 | 0.96 | 0.94 | 0.93 | 0.91 | 0.87 | 0.82 | 0.76 | 0.70  | 0.63  | 0.45  | 0.26  |
| Russian Federation | G3408     | 1              | 0.97 | 0.93 | 0.89 | 0.87 | 0.83 | 0.80 | 0.79 | 0.78 | 0.76 | 0.75 | 0.72 | 0.72 | 0.70 | 0.70  | 0.68  | 0.66  | 0.63  |
| Russian Federation | G3409     | 1              | 0.98 | 0.93 | 0.87 | 0.81 | 0.75 | 0.72 | 0.68 | 0.64 | 0.62 | 0.60 | 0.56 | 0.54 | 0.50 | 0.48  | 0.45  | 0.40  | 0.35  |
| Russian Federation | G3410     | 1              | 1.00 | 1.00 | 1.00 | 1.00 | 1.00 | 0.99 | 0.99 | 0.98 | 0.96 | 0.94 | 0.87 | 0.79 | 0.72 | 0.65  | 0.59  | 0.48  | 0.42  |
| Russian Federation | G3419     | 1              | 0.98 | 0.94 | 0.87 | 0.80 | 0.75 | 0.71 | 0.68 | 0.65 | 0.62 | 0.59 | 0.54 | 0.51 | 0.49 | 0.48  | 0.48  | 0.41  | 0.39  |
| Russian Federation | G3420     | 1              | 0.99 | 0.97 | 0.93 | 0.89 | 0.84 | 0.81 | 0.78 | 0.75 | 0.72 | 0.70 | 0.66 | 0.62 | 0.60 | 0.59  | 0.59  | 0.56  | 0.55  |
| Russian Federation | G3427     | 1              | 0.99 | 0.96 | 0.92 | 0.85 | 0.77 | 0.68 | 0.61 | 0.56 | 0.51 | 0.46 | 0.39 | 0.34 | 0.29 | 0.26  | 0.24  | 0.20  | 0.15  |
| Russian Federation | G3428     | 1              | 0.99 | 0.97 | 0.93 | 0.89 | 0.83 | 0.79 | 0.76 | 0.74 | 0.71 | 0.70 | 0.66 | 0.64 | 0.62 | 0.61  | 0.60  | 0.56  | 0.53  |
| Russian Federation | G3429     | 1              | 0.99 | 0.97 | 0.95 | 0.92 | 0.90 | 0.88 | 0.87 | 0.86 | 0.85 | 0.84 | 0.82 | 0.80 | 0.79 | 0.77  | 0.76  | 0.73  | 0.70  |
| Russian Federation | G3434     | 1              | 0.99 | 0.96 | 0.86 | 0.75 | 0.63 | 0.51 | 0.41 | 0.34 | 0.28 | 0.23 | 0.16 | 0.09 | 0.04 | 0.03  | 0.05  | 0.06  | 0.01  |
| Russian Federation | G3435     | 1              | 0.99 | 0.98 | 0.96 | 0.92 | 0.85 | 0.76 | 0.68 | 0.61 | 0.54 | 0.48 | 0.39 | 0.31 | 0.25 | 0.20  | 0.20  | 0.27  | 0.29  |
| Russian Federation | G3436     | 1              | 0.99 | 0.97 | 0.93 | 0.88 | 0.84 | 0.80 | 0.77 | 0.75 | 0.72 | 0.69 | 0.65 | 0.62 | 0.60 | 0.58  | 0.57  | 0.50  | 0.48  |
| Russian Federation | G3437     | 1              | 1.00 | 0.98 | 0.95 | 0.90 | 0.84 | 0.79 | 0.74 | 0.71 | 0.69 | 0.67 | 0.62 | 0.57 | 0.56 | 0.54  | 0.55  | 0.52  | 0.49  |
| Russian Federation | G3438     | 1              | 0.98 | 0.93 | 0.88 | 0.83 | 0.77 | 0.74 | 0.71 | 0.67 | 0.64 | 0.63 | 0.59 | 0.57 | 0.54 | 0.52  | 0.50  | 0.45  | 0.40  |
| Russian Federation | G3444     | 1              | 0.99 | 0.95 | 0.90 | 0.85 | 0.78 | 0.74 | 0.72 | 0.69 | 0.66 | 0.65 | 0.61 | 0.60 | 0.58 | 0.58  | 0.56  | 0.54  | 0.52  |
| Russian Federation | G3454     | 1              | 0.99 | 0.95 | 0.90 | 0.84 | 0.78 | 0.73 | 0.71 | 0.68 | 0.66 | 0.65 | 0.61 | 0.60 | 0.58 | 0.58  | 0.56  | 0.55  | 0.53  |
| Russian Federation | G3460     | 1              | 0.95 | 0.92 | 0.88 | 0.80 | 0.78 | 0.77 | 0.74 | 0.69 | 0.67 | 0.66 | 0.60 | 0.61 | 0.58 | 0.56  | 0.56  | 0.50  | 0.50  |
| Russian Federation | G3461     | 1              | 0.96 | 0.88 | 0.81 | 0.76 | 0.71 | 0.66 | 0.63 | 0.61 | 0.59 | 0.56 | 0.53 | 0.48 | 0.44 | 0.39  | 0.34  | 0.26  | 0.20  |
| Russian Federation | G3462     | 1              | 0.94 | 0.83 | 0.73 | 0.67 | 0.63 | 0.58 | 0.54 | 0.52 | 0.50 | 0.47 | 0.45 | 0.41 | 0.37 | 0.31  | 0.25  | 0.18  | 0.11  |
| Russian Federation | G3466     | 1              | 0.94 | 0.79 | 0.64 | 0.52 | 0.42 | 0.34 | 0.27 | 0.22 | 0.17 | 0.14 | 0.08 | 0.03 | 0.00 | 0.06  | 0.13  | 0.05  | 0.04  |
| Russian Federation | G3467     | 1              | 0.99 | 0.95 | 0.89 | 0.83 | 0.75 | 0.71 | 0.68 | 0.65 | 0.63 | 0.62 | 0.58 | 0.57 | 0.55 | 0.55  | 0.54  | 0.52  | 0.51  |
| Russian Federation | G3468     | 1              | 0.96 | 0.91 | 0.88 | 0.85 | 0.80 | 0.78 | 0.76 | 0.75 | 0.72 | 0.70 | 0.66 | 0.66 | 0.63 | 0.63  | 0.60  | 0.58  | 0.56  |
| Russian Federation | G3476     | 1              | 0.95 | 0.83 | 0.69 | 0.58 | 0.48 | 0.41 | 0.35 | 0.31 | 0.28 | 0.26 | 0.22 | 0.17 | 0.15 | 0.15  | 0.14  | 0.06  | 0.01  |
| Russian Federation | G3477     | 1              | 1.00 | 1.00 | 0.99 | 0.97 | 0.94 | 0.91 | 0.87 | 0.82 | 0.77 | 0.73 | 0.64 | 0.55 | 0.48 | 0.42  | 0.38  | 0.33  | 0.34  |
| Russian Federation | G3486     | 1              | 1.00 | 0.99 | 0.98 | 0.95 | 0.92 | 0.88 | 0.83 | 0.77 | 0.72 | 0.67 | 0.56 | 0.47 | 0.39 | 0.33  | 0.28  | 0.22  | 0.22  |
| Russian Federation | G3487     | 1              | 0.99 | 0.96 | 0.93 | 0.89 | 0.85 | 0.82 | 0.80 | 0.78 | 0.75 | 0.74 | 0.72 | 0.70 | 0.67 | 0.66  | 0.64  | 0.60  | 0.56  |
| Russian Federation | G3490     | 1              | 0.99 | 0.97 | 0.94 | 0.87 | 0.82 | 0.79 | 0.74 | 0.71 | 0.70 | 0.67 | 0.61 | 0.58 | 0.57 | 0.56  | 0.54  | 0.49  | 0.48  |
| Russian Federation | G3491     | 1              | 1.00 | 1.00 | 0.99 | 0.98 | 0.96 | 0.93 | 0.90 | 0.87 | 0.84 | 0.80 | 0.74 | 0.69 | 0.64 | 0.60  | 0.57  | 0.51  | 0.46  |
| Russian Federation | G3492     | 1              | 0.99 | 0.95 | 0.90 | 0.87 | 0.82 | 0.79 | 0.77 | 0.74 | 0.73 | 0.71 | 0.69 | 0.66 | 0.65 | 0.63  | 0.61  | 0.58  | 0.55  |
| Russian Federation | G3497     | 1              | 1.00 | 0.99 | 0.96 | 0.91 | 0.84 | 0.77 | 0.70 | 0.62 | 0.56 | 0.50 | 0.38 | 0.30 | 0.23 | 0.15  | 0.06  | -0.02 | -0.07 |
| Russian Federation | G3503     | 1              | 1.00 | 0.99 | 0.95 | 0.87 | 0.78 | 0.68 | 0.59 | 0.52 | 0.46 | 0.41 | 0.32 | 0.26 | 0.22 | 0.19  | 0.18  | 0.16  | 0.14  |
| Russian Federation | G3504     | 1              | 1.00 | 0.99 | 0.98 | 0.95 | 0.92 | 0.87 | 0.82 | 0.77 | 0.73 | 0.69 | 0.63 | 0.58 | 0.54 | 0.50  | 0.47  | 0.43  | 0.38  |
| Russian Federation | G3506     | 1              | 1.00 | 1.00 | 0.99 | 0.98 | 0.96 | 0.93 | 0.89 | 0.84 | 0.79 | 0.74 | 0.63 | 0.53 | 0.45 | 0.39  | 0.34  | 0.27  | 0.28  |
| Russian Federation | G3507     | 1              | 0.97 | 0.87 | 0.76 | 0.69 | 0.63 | 0.58 | 0.54 | 0.52 | 0.49 | 0.47 | 0.44 | 0.40 | 0.37 | 0.37  | 0.35  | 0.32  | 0.27  |



| Country            | GloFAS ID | Station filter | LT1  | LT2   | LT3   | LT4   | LT5    | LT6   | LT7   | LT8   | LT9   | LT10  | LT12  | LT14  | LT16  | LT18  | LT20  | LT25  | L30   |
|--------------------|-----------|----------------|------|-------|-------|-------|--------|-------|-------|-------|-------|-------|-------|-------|-------|-------|-------|-------|-------|
| Russian Federation | G3509     | 1              | 0.97 | 0.89  | 0.82  | 0.76  | 0.71   | 0.67  | 0.62  | 0.59  | 0.56  | 0.55  | 0.51  | 0.48  | 0.44  | 0.43  | 0.44  | 0.37  | 0.33  |
| Russian Federation | G3516     | 1              | 0.90 | 0.67  | 0.50  | 0.35  | 0.26   | 0.20  | 0.16  | 0.11  | 0.08  | 0.06  | 0.00  | -0.02 | -0.04 | -0.04 | -0.03 | 0.02  | 0.01  |
| Russian Federation | G3518     | 1              | 0.96 | 0.92  | 0.88  | 0.83  | 0.79   | 0.77  | 0.76  | 0.75  | 0.74  | 0.73  | 0.69  | 0.67  | 0.66  | 0.65  | 0.62  | 0.58  | 0.54  |
| Russian Federation | G3520     | 1              | 0.99 | 0.97  | 0.94  | 0.90  | 0.86   | 0.83  | 0.81  | 0.78  | 0.76  | 0.75  | 0.72  | 0.70  | 0.68  | 0.66  | 0.65  | 0.61  | 0.57  |
| Russian Federation | G3530     | 1              | 0.84 | 0.65  | 0.51  | 0.38  | 0.28   | 0.20  | 0.13  | 0.07  | 0.01  | -0.03 | -0.09 | -0.14 | -0.15 | -0.11 | -0.12 | -0.14 | -0.13 |
| Russian Federation | G3538     | 1              | 0.92 | 0.77  | 0.60  | 0.45  | 0.31   | 0.21  | 0.13  | 0.06  | -0.01 | -0.06 | -0.13 | -0.18 | -0.20 | -0.15 | -0.15 | -0.13 | -0.12 |
| Russian Federation | G3539     | 1              | 0.74 | 0.51  | 0.36  | 0.26  | 0.18   | 0.11  | 0.07  | 0.01  | -0.05 | -0.09 | -0.15 | -0.17 | -0.19 | -0.16 | -0.18 | -0.23 | -0.24 |
| Russian Federation | G3543     | 1              | 1.00 | 0.98  | 0.96  | 0.92  | 0.88   | 0.82  | 0.78  | 0.73  | 0.69  | 0.67  | 0.61  | 0.57  | 0.53  | 0.49  | 0.46  | 0.43  | 0.38  |
| Russian Federation | G3544     | 1              | 0.95 | 0.86  | 0.75  | 0.67  | 0.62   | 0.56  | 0.52  | 0.48  | 0.45  | 0.42  | 0.38  | 0.34  | 0.28  | 0.24  | 0.21  | 0.15  | 0.11  |
| Russian Federation | G3553     | 1              | 0.99 | 0.95  | 0.92  | 0.89  | 0.86   | 0.82  | 0.79  | 0.76  | 0.72  | 0.69  | 0.64  | 0.58  | 0.53  | 0.50  | 0.48  | 0.45  | 0.39  |
| Russian Federation | G3566     | 1              | 0.99 | 0.98  | 0.96  | 0.95  | 0.95   | 0.95  | 0.95  | 0.95  | 0.94  | 0.94  | 0.94  | 0.93  | 0.92  | 0.92  | 0.92  | 0.90  | 0.88  |
| Russian Federation | G3578     | 1              | 1.00 | 0.98  | 0.96  | 0.92  | 0.88   | 0.83  | 0.80  | 0.77  | 0.74  | 0.72  | 0.69  | 0.65  | 0.62  | 0.61  | 0.60  | 0.58  | 0.54  |
| Russian Federation | G3579     | 1              | 0.98 | 0.92  | 0.82  | 0.74  | 0.69   | 0.64  | 0.60  | 0.57  | 0.54  | 0.52  | 0.48  | 0.45  | 0.42  | 0.41  | 0.40  | 0.36  | 0.30  |
| Russian Federation | G3587     | 1              | 0.96 | 0.88  | 0.78  | 0.69  | 0.62   | 0.55  | 0.49  | 0.45  | 0.41  | 0.38  | 0.33  | 0.29  | 0.24  | 0.16  | 0.10  | 0.01  | -0.05 |
| Russian Federation | G3588     | 1              | 0.96 | 0.86  | 0.75  | 0.67  | 0.60   | 0.54  | 0.49  | 0.44  | 0.41  | 0.38  | 0.34  | 0.30  | 0.25  | 0.19  | 0.15  | 0.08  | 0.03  |
| Russian Federation | G3597     | 1              | 0.96 | 0.90  | 0.84  | 0.80  | 0.76   | 0.71  | 0.67  | 0.65  | 0.62  | 0.60  | 0.57  | 0.54  | 0.51  | 0.50  | 0.50  | 0.45  | 0.43  |
| Russian Federation | G3598     | 1              | 1.00 | 0.98  | 0.96  | 0.92  | 0.88   | 0.83  | 0.78  | 0.74  | 0.70  | 0.68  | 0.62  | 0.59  | 0.55  | 0.51  | 0.49  | 0.46  | 0.40  |
| Russian Federation | G3599     | 1              | 0.96 | 0.87  | 0.76  | 0.67  | 0.59   | 0.51  | 0.45  | 0.40  | 0.36  | 0.32  | 0.27  | 0.23  | 0.19  | 0.07  | -0.04 | -0.16 | -0.23 |
| Russian Federation | G3626     | 1              | 0.95 | 0.85  | 0.77  | 0.72  | 0.67   | 0.62  | 0.58  | 0.55  | 0.51  | 0.48  | 0.45  | 0.41  | 0.37  | 0.35  | 0.35  | 0.30  | 0.25  |
| Russian Federation | G3635     | 1              | 0.97 | 0.91  | 0.84  | 0.80  | 0.75   | 0.71  | 0.68  | 0.65  | 0.62  | 0.59  | 0.54  | 0.52  | 0.48  | 0.44  | 0.42  | 0.35  | 0.31  |
| Russian Federation | G3636     | 1              | 0.97 | 0.91  | 0.84  | 0.79  | 0.74   | 0.69  | 0.65  | 0.61  | 0.58  | 0.55  | 0.50  | 0.47  | 0.43  | 0.39  | 0.39  | 0.33  | 0.29  |
| Russian Federation | G3663     | 1              | 0.97 | 0.88  | 0.79  | 0.72  | 0.68   | 0.63  | 0.59  | 0.56  | 0.55  | 0.53  | 0.50  | 0.48  | 0.47  | 0.50  | 0.53  | 0.45  | 0.41  |
| Russian Federation | G3676     | 1              | 0.96 | 0.89  | 0.80  | 0.73  | 0.67   | 0.61  | 0.56  | 0.52  | 0.49  | 0.45  | 0.41  | 0.37  | 0.33  | 0.28  | 0.24  | 0.17  | 0.13  |
| Russian Federation | G3723     | 1              | 0.96 | 0.89  | 0.79  | 0.72  | 0.66   | 0.59  | 0.53  | 0.49  | 0.46  | 0.41  | 0.38  | 0.34  | 0.30  | 0.25  | 0.23  | 0.17  | 0.14  |
| Russian Federation | G3729     | 1              | 0.97 | 0.92  | 0.84  | 0.76  | 0.68   | 0.62  | 0.55  | 0.51  | 0.47  | 0.43  | 0.38  | 0.33  | 0.29  | 0.25  | 0.23  | 0.17  | 0.14  |
| Russian Federation | G3763     | 1              | 0.96 | 0.90  | 0.81  | 0.73  | 0.66   | 0.61  | 0.55  | 0.51  | 0.48  | 0.44  | 0.40  | 0.36  | 0.33  | 0.27  | 0.25  | 0.18  | 0.14  |
| Russian Federation | G3796     | 1              | 0.97 | 0.90  | 0.81  | 0.72  | 0.66   | 0.59  | 0.53  | 0.50  | 0.46  | 0.43  | 0.38  | 0.33  | 0.30  | 0.26  | 0.24  | 0.19  | 0.17  |
| Saudi Arabia       | G4537     | 1              | 1.00 | 0.99  | 0.97  | 0.95  | 0.93   | 0.92  | 0.91  | 0.90  | 0.88  | 0.86  | 0.81  | 0.76  | 0.76  | 0.75  | 0.75  | 0.70  | 0.64  |
| Saudi Arabia       | G4547     | 1              | 1.00 | 1.00  | 1.00  | 1.00  | 1.00   | 0.99  | 0.99  | 0.98  | 0.95  | 0.94  | 0.91  | 0.82  | 0.81  | 0.77  | 0.75  | 0.69  | 0.67  |
| Saudi Arabia       | G4552     | 1              | 0.96 | 0.85  | 0.76  | 0.71  | 0.62   | 0.55  | 0.52  | 0.48  | 0.46  | 0.44  | 0.37  | 0.32  | 0.30  | 0.28  | 0.22  | 0.22  | 0.20  |
| Saudi Arabia       | G4553     | 1              | 1.00 | 0.99  | 0.98  | 0.97  | 0.96   | 0.96  | 0.94  | 0.87  | 0.79  | 0.77  | 0.78  | 0.72  | 0.66  | 0.55  | 0.46  | 0.41  | 0.39  |
| Saudi Arabia       | G4554     | 1              | 1.00 | 1.00  | 0.99  | 0.99  | 0.99   | 0.98  | 0.97  | 0.94  | 0.92  | 0.90  | 0.88  | 0.86  | 0.84  | 0.80  | 0.78  | 0.65  | 0.53  |
| Saudi Arabia       | G4557     | 1              | 1.00 | 1.00  | 0.99  | 0.99  | 0.99   | 0.97  | 0.90  | 0.85  | 0.84  | 0.82  | 0.73  | 0.62  | 0.56  | 0.49  | 0.43  | 0.31  | 0.25  |
| Saudi Arabia       | G4585     | 1              | 1.00 | 1.00  | 0.99  | 0.99  | 0.97   | 0.95  | 0.93  | 0.93  | 0.92  | 0.91  | 0.88  | 0.84  | 0.84  | 0.83  | 0.79  | 0.75  | 0.70  |
| Saudi Arabia       | G4586     | 1              | 1.00 | 1.00  | 0.99  | 0.99  | 0.97   | 0.96  | 0.94  | 0.91  | 0.88  | 0.86  | 0.79  | 0.77  | 0.75  | 0.73  | 0.69  | 0.55  | 0.50  |
| Saudi Arabia       | G4587     | 1              | 1.00 | 0.90  | 0.78  | 0.86  | 0.91   | 0.79  | 0.62  | 0.71  | 0.66  | 0.53  | 0.67  | 0.50  | 0.55  | 0.48  | 0.57  | 0.52  | 0.54  |
| Saudi Arabia       | G4590     | 1              | 0.92 | -1.83 | -6.54 | -9.90 | -10.11 | -7.59 | -5.52 | -6.47 | -4.98 | -3.24 | -5.65 | -3.04 | -5.06 | -5.85 | -3.35 | -1.19 | -2.22 |
| Saudi Arabia       | G4618     | 1              | 0.93 | 0.80  | 0.65  | 0.42  | 0.17   | -0.08 | -0.54 | -1.28 | -2.05 | -2.52 | -2.79 | -2.24 | -1.80 | -1.64 | -1.44 | -0.77 | -0.40 |
| Saudi Arabia       | G4622     | 1              | 1.00 | 0.99  | 0.98  | 0.97  | 0.96   | 0.55  | -0.40 | -1.21 | -0.89 | -0.81 | -1.16 | -1.59 | -1.67 | -1.34 | -1.11 | -0.96 | -0.48 |



| Country      | GloFAS ID | Station filter | LT1   | LT2    | LT3   | LT4    | LT5    | LT6    | LT7    | LT8    | LT9    | LT10   | LT12   | LT14   | LT16  | LT18  | LT20  | LT25  | L30   |
|--------------|-----------|----------------|-------|--------|-------|--------|--------|--------|--------|--------|--------|--------|--------|--------|-------|-------|-------|-------|-------|
| Saudi Arabia | G4623     | 1              | 1.00  | 1.00   | 1.00  | 1.00   | 1.00   | 1.00   | 1.00   | 1.00   | 1.00   | 1.00   | 0.99   | 0.98   | 0.95  | 0.89  | 0.82  | 0.61  | 0.42  |
| Saudi Arabia | G4627     | 1              | 1.00  | 0.99   | 0.99  | 0.97   | 0.93   | 0.65   | 0.11   | 0.06   | 0.13   | 0.17   | -0.21  | -0.36  | -0.31 | -0.11 | 0.04  | 0.24  | 0.29  |
| Saudi Arabia | G4628     | 1              | 1.00  | 0.99   | 0.97  | 0.94   | 0.32   | -1.60  | -1.88  | -3.40  | -4.43  | -4.02  | -3.01  | -2.57  | -2.77 | -2.33 | -2.05 | -1.33 | -0.95 |
| Saudi Arabia | G4629     | 0              | -     | -      | -     | -      | -      | -      | -      | -      | -      | -      | -      | -      | -     | -     | -     | -     | -     |
| Saudi Arabia | G4631     | 0              | 1.00  | 1.00   | 0.48  | -      | -      | -      | -      | -      | -      | -      | -      | -      | -     | -     | -     | -     | -     |
| Saudi Arabia | G4643     | 0              | -     | -      | -     | -      | -      | -      | -      | -      | -      | -      | -      | -      | -     | -     | -     | -     | -     |
| Saudi Arabia | G4644     | 1              | 1.00  | 1.00   | 1.00  | 1.00   | 1.00   | 1.00   | 1.00   | 1.00   | 1.00   | 1.00   | 0.98   | 0.95   | 0.89  | 0.79  | 0.69  | 0.48  | 0.33  |
| Saudi Arabia | G4656     | 0              | -     | -      | -     | -      | -      | -      | -      | -      | -      | -      | -      | -      | -     | -     | -     | -     | -     |
| Saudi Arabia | G4660     | 1              | 1.00  | 1.00   | 1.00  | 1.00   | 1.00   | 1.00   | 1.00   | 1.00   | 1.00   | 0.99   | 0.97   | 0.92   | 0.84  | 0.73  | 0.63  | 0.43  | 0.28  |
| Saudi Arabia | G4667     | 1              | 1.00  | 1.00   | 0.98  | 0.84   | 0.75   | 0.69   | 0.59   | 0.57   | 0.53   | 0.48   | 0.39   | 0.32   | 0.30  | 0.24  | 0.22  | 0.15  | 0.14  |
| Saudi Arabia | G4676     | 1              | 1.00  | 1.00   | 0.99  | 0.94   | 0.89   | 0.82   | 0.73   | 0.64   | 0.57   | 0.52   | 0.41   | 0.33   | 0.26  | 0.23  | 0.19  | 0.15  | 0.15  |
| Saudi Arabia | G4677     | 1              | 1.00  | 1.00   | 1.00  | 1.00   | 1.00   | 0.98   | 0.97   | 0.96   | 0.94   | 0.80   | 0.69   | 0.61   | 0.57  | 0.48  | 0.54  | 0.40  | 0.43  |
| Saudi Arabia | G4678     | 1              | 1.00  | 1.00   | 1.00  | 1.00   | 1.00   | 1.00   | 1.00   | 1.00   | 1.00   | 1.00   | 0.93   | 0.81   | 0.70  | 0.73  | 0.64  | 0.60  | 0.50  |
| Saudi Arabia | G4681     | 0              | -     | -      | -     | -      | -      | -      | -      | -      | -      | -      | -      | -      | -     | -     | -     | -     | -     |
| Saudi Arabia | G4684     | 0              | -9.93 | -91.60 | -     | -78.96 | -60.00 | -45.78 | -35.67 | -28.51 | -23.95 | -20.01 | -14.34 | -10.72 | -8.47 | -6.92 | -7.32 | -4.53 | -3.02 |
| Saudi Arabia | G4695     | 1              | 1.00  | 1.00   | 1.00  | 0.99   | 0.96   | 0.89   | 0.82   | 0.75   | 0.69   | 0.63   | 0.51   | 0.41   | 0.33  | 0.26  | 0.21  | 0.13  | 0.10  |
| Saudi Arabia | G4696     | 0              | 1.00  | 0.86   | -0.95 | -3.04  | -3.98  | -3.81  | -3.31  | -2.78  | -2.35  | -2.29  | -3.02  | -2.39  | -1.85 | -1.38 | -1.09 | -0.43 | -0.06 |
| Saudi Arabia | G4697     | 1              | 1.00  | 0.99   | 0.99  | 0.98   | 0.98   | 0.97   | 0.92   | 0.90   | 0.90   | 0.89   | 0.80   | 0.74   | 0.65  | 0.56  | 0.46  | 0.33  | 0.20  |
| Saudi Arabia | G4698     | 0              | -     | -      | -     | -      | -      | -      | -      | -      | -      | -      | -      | -      | -     | -     | -     | -     | -     |
| Saudi Arabia | G4701     | 1              | 1.00  | 1.00   | 1.00  | 1.00   | 1.00   | 0.98   | 0.95   | 0.90   | 0.80   | 0.72   | 0.60   | 0.48   | 0.36  | 0.26  | 0.20  | 0.08  | 0.05  |
| Saudi Arabia | G4702     | 1              | 1.00  | 1.00   | 1.00  | 1.00   | 1.00   | 0.98   | 0.83   | 0.76   | 0.75   | 0.75   | 0.61   | 0.55   | 0.54  | 0.51  | 0.52  | 0.45  | 0.43  |
| Saudi Arabia | G4703     | 1              | 1.00  | 1.00   | 1.00  | 1.00   | 1.00   | 0.99   | 0.97   | 0.94   | 0.88   | 0.78   | 0.65   | 0.52   | 0.43  | 0.31  | 0.23  | 0.11  | 0.07  |
| Saudi Arabia | G4704     | 0              | -     | -      | -     | -      | -      | -      | -      | -      | -      | -      | -      | -      | -     | -     | -     | -     | -     |
| Saudi Arabia | G4705     | 0              | -1.77 | -8.54  | -8.19 | -6.90  | -5.41  | -4.23  | -3.35  | -2.63  | -2.08  | -1.71  | -1.06  | -0.61  | -0.28 | -0.04 | 0.12  | 0.24  | 0.46  |
| Saudi Arabia | G4707     | 0              | -     | -      | -     | -      | -      | -      | -      | -      | -      | -      | -      | -      | -     | -     | -     | -     | -     |
| Saudi Arabia | G4708     | 0              | 1.00  | 1.00   | 1.00  | 1.00   | 1.00   | 0.99   | 0.96   | 0.93   | 0.92   | 0.91   | 0.90   | -0.80  | -1.04 | -1.02 | -0.76 | -2.28 | -1.23 |
| Saudi Arabia | G4709     | 1              | 1.00  | 1.00   | 1.00  | 0.99   | 0.90   | 0.46   | 0.10   | -0.21  | -0.92  | -3.87  | -4.74  | -4.23  | -3.30 | -2.98 | -2.19 | -0.97 | -1.26 |
| Saudi Arabia | G4715     | 1              | 1.00  | 1.00   | 1.00  | 1.00   | 1.00   | 0.99   | 0.84   | 0.73   | 0.74   | 0.76   | 0.63   | 0.59   | 0.55  | 0.53  | 0.52  | 0.48  | 0.43  |
| Saudi Arabia | G4719     | 1              | 1.00  | 1.00   | 1.00  | 1.00   | 0.81   | 0.71   | 0.74   | 0.79   | 0.66   | 0.60   | 0.57   | 0.59   | 0.57  | 0.60  | 0.49  | 0.55  | 0.50  |
| Saudi Arabia | G4720     | 1              | 1.00  | 1.00   | 1.00  | 1.00   | 1.00   | 0.91   | 0.80   | 0.79   | 0.76   | 0.68   | 0.73   | 0.61   | 0.60  | 0.56  | 0.58  | 0.50  | 0.46  |
| Saudi Arabia | G4735     | 0              | 1.00  | 0.64   | -0.63 | -2.00  | -4.26  | -4.01  | -3.24  | -2.65  | -2.21  | -1.86  | -1.41  | -1.47  | -1.12 | -0.77 | -0.51 | -0.55 | -0.23 |
| Saudi Arabia | G4736     | 0              | 1.00  | 0.99   | 0.73  | -0.27  | -1.00  | -2.85  | -3.34  | -2.83  | -2.29  | -1.78  | -1.06  | -1.14  | -1.52 | -1.29 | -0.98 | -0.63 | -0.40 |
| Saudi Arabia | G4741     | 0              | 0.99  | -28.77 | -     | -      | -      | -      | -      | -      | -      | -      | -      | -      | -     | -     | -     | -     | -     |
| Saudi Arabia | G4742     | 1              | 1.00  | 1.00   | 0.99  | 0.86   | 0.68   | 0.44   | -0.23  | -0.32  | -0.24  | -0.15  | -0.07  | -0.16  | -0.03 | 0.01  | -0.06 | -0.10 | -0.15 |
| Saudi Arabia | G4790     | 1              | 1.00  | 1.00   | 0.99  | 0.99   | 0.98   | 0.96   | 0.92   | 0.86   | 0.78   | 0.70   | 0.57   | 0.46   | 0.37  | 0.30  | 0.23  | 0.12  | 0.10  |
| Saudi Arabia | G4798     | 1              | 1.00  | 0.99   | 0.94  | 0.88   | 0.77   | 0.64   | 0.55   | 0.47   | 0.38   | 0.29   | 0.18   | 0.09   | 0.04  | -0.02 | -0.04 | 0.08  | 0.17  |
| Syria        | G1922     | 1              | 1.00  | 1.00   | 1.00  | 1.00   | 1.00   | 1.00   | 1.00   | 1.00   | 1.00   | 1.00   | 0.99   | 0.99   | 0.99  | 0.99  | 0.99  | 0.98  | 0.97  |
| Syria        | G1943     | 1              | 1.00  | 1.00   | 0.99  | 0.97   | 0.94   | 0.91   | 0.86   | 0.81   | 0.77   | 0.74   | 0.71   | 0.64   | 0.61  | 0.60  | 0.61  | 0.57  | 0.55  |
| Syria        | G4127     | 1              | 1.00  | 0.99   | 0.95  | 0.91   | 0.87   | 0.81   | 0.74   | 0.71   | 0.70   | 0.69   | 0.63   | 0.57   | 0.59  | 0.57  | 0.55  | 0.53  | 0.52  |

| Country    | GloFAS ID | Station filter | LT1  | LT2  | LT3  | LT4  | LT5  | LT6  | LT7  | LT8  | LT9  | LT10  | LT12  | LT14  | LT16  | LT18  | LT20  | LT25  | L30   |
|------------|-----------|----------------|------|------|------|------|------|------|------|------|------|-------|-------|-------|-------|-------|-------|-------|-------|
| Syria      | G4128     | 1              | 1.00 | 0.98 | 0.95 | 0.90 | 0.86 | 0.81 | 0.78 | 0.74 | 0.73 | 0.72  | 0.66  | 0.62  | 0.63  | 0.62  | 0.61  | 0.60  | 0.61  |
| Syria      | G4140     | 1              | 1.00 | 1.00 | 0.98 | 0.95 | 0.92 | 0.89 | 0.87 | 0.85 | 0.82 | 0.79  | 0.71  | 0.64  | 0.60  | 0.55  | 0.52  | 0.47  | 0.42  |
| Syria      | G4147     | 1              | 1.00 | 1.00 | 1.00 | 1.00 | 1.00 | 1.00 | 1.00 | 1.00 | 1.00 | 1.00  | 0.99  | 0.99  | 0.99  | 0.99  | 0.99  | 0.98  | 0.97  |
| Syria      | G4169     | 1              | 1.00 | 1.00 | 1.00 | 1.00 | 1.00 | 1.00 | 1.00 | 1.00 | 1.00 | 1.00  | 0.99  | 0.99  | 0.99  | 0.99  | 0.99  | 0.98  | 0.98  |
| Syria      | G4170     | 1              | 1.00 | 1.00 | 1.00 | 1.00 | 1.00 | 1.00 | 1.00 | 1.00 | 1.00 | 0.99  | 0.97  | 0.92  | 0.87  | 0.84  | 0.80  | 0.66  | 0.63  |
| Syria      | G4172     | 1              | 1.00 | 1.00 | 1.00 | 1.00 | 1.00 | 1.00 | 1.00 | 1.00 | 1.00 | 1.00  | 0.99  | 0.99  | 0.99  | 0.99  | 0.98  | 0.97  | 0.97  |
| Syria      | G4175     | 1              | 0.99 | 0.99 | 0.98 | 0.98 | 0.98 | 0.97 | 0.97 | 0.96 | 0.95 | 0.94  | 0.94  | 0.93  | 0.92  | 0.84  | 0.79  | 0.72  | 0.61  |
| Syria      | G4187     | 1              | 1.00 | 0.99 | 0.98 | 0.97 | 0.96 | 0.95 | 0.93 | 0.91 | 0.89 | 0.88  | 0.85  | 0.83  | 0.81  | 0.78  | 0.73  | 0.71  | 0.67  |
| Tajikistan | G0746     | 1              | 0.96 | 0.82 | 0.59 | 0.40 | 0.33 | 0.30 | 0.26 | 0.18 | 0.10 | 0.03  | -0.05 | -0.13 | -0.19 | -0.33 | -0.56 | -0.63 | -0.62 |
| Tajikistan | G4077     | 1              | 0.95 | 0.81 | 0.69 | 0.61 | 0.50 | 0.38 | 0.26 | 0.15 | 0.04 | -0.04 | -0.22 | -0.33 | -0.41 | -0.59 | -0.82 | -0.91 | -0.86 |
| Tajikistan | G4093     | 1              | 0.84 | 0.61 | 0.45 | 0.35 | 0.28 | 0.22 | 0.16 | 0.10 | 0.05 | 0.01  | -0.12 | -0.15 | -0.31 | -0.59 | -0.72 | -0.77 | -0.70 |
| Tajikistan | G4104     | 1              | 0.99 | 0.88 | 0.69 | 0.54 | 0.45 | 0.40 | 0.37 | 0.35 | 0.31 | 0.28  | 0.22  | 0.16  | 0.12  | 0.06  | 0.02  | -0.04 | -0.05 |
| Tajikistan | G4105     | 1              | 1.00 | 0.99 | 0.98 | 0.95 | 0.90 | 0.84 | 0.78 | 0.73 | 0.69 | 0.65  | 0.57  | 0.49  | 0.42  | 0.36  | 0.28  | 0.02  | -0.12 |
| Tajikistan | G4110     | 1              | 1.00 | 0.99 | 0.97 | 0.92 | 0.85 | 0.77 | 0.68 | 0.62 | 0.56 | 0.50  | 0.38  | 0.28  | 0.17  | 0.07  | -0.09 | -0.38 | -0.46 |
| Tajikistan | G4111     | 1              | 1.00 | 0.99 | 0.97 | 0.92 | 0.84 | 0.75 | 0.66 | 0.59 | 0.52 | 0.46  | 0.34  | 0.24  | 0.13  | 0.03  | -0.15 | -0.47 | -0.56 |
| Thailand   | G0938     | 1              | 0.97 | 0.91 | 0.84 | 0.76 | 0.69 | 0.63 | 0.58 | 0.53 | 0.48 | 0.43  | 0.33  | 0.25  | 0.19  | 0.15  | 0.11  | 0.04  | 0.00  |
| Thailand   | G0939     | 1              | 0.98 | 0.94 | 0.87 | 0.79 | 0.71 | 0.64 | 0.58 | 0.52 | 0.47 | 0.42  | 0.32  | 0.23  | 0.16  | 0.11  | 0.08  | 0.00  | -0.05 |
| Thailand   | G0953     | 1              | 1.00 | 0.98 | 0.95 | 0.91 | 0.86 | 0.80 | 0.73 | 0.65 | 0.58 | 0.51  | 0.39  | 0.27  | 0.17  | 0.09  | 0.03  | -0.06 | -0.13 |
| Thailand   | G0954     | 1              | 1.00 | 0.99 | 0.96 | 0.92 | 0.88 | 0.83 | 0.76 | 0.69 | 0.62 | 0.55  | 0.42  | 0.30  | 0.19  | 0.10  | 0.04  | -0.06 | -0.13 |
| Thailand   | G0955     | 1              | 0.94 | 0.82 | 0.73 | 0.68 | 0.62 | 0.58 | 0.54 | 0.50 | 0.46 | 0.43  | 0.36  | 0.31  | 0.25  | 0.16  | 0.07  | -0.05 | -0.09 |
| Thailand   | G0958     | 1              | 1.00 | 0.98 | 0.96 | 0.93 | 0.89 | 0.84 | 0.80 | 0.75 | 0.70 | 0.64  | 0.53  | 0.42  | 0.30  | 0.20  | 0.11  | -0.02 | -0.10 |
| Thailand   | G0962     | 1              | 1.00 | 0.99 | 0.97 | 0.94 | 0.91 | 0.87 | 0.83 | 0.78 | 0.73 | 0.68  | 0.57  | 0.46  | 0.36  | 0.25  | 0.16  | 0.01  | -0.08 |
| Thailand   | G0964     | 1              | 0.99 | 0.96 | 0.93 | 0.88 | 0.83 | 0.76 | 0.71 | 0.67 | 0.63 | 0.58  | 0.50  | 0.42  | 0.38  | 0.33  | 0.28  | 0.21  | 0.16  |
| Thailand   | G0969     | 1              | 0.99 | 0.93 | 0.83 | 0.74 | 0.64 | 0.56 | 0.49 | 0.44 | 0.39 | 0.34  | 0.25  | 0.19  | 0.14  | 0.11  | 0.09  | 0.06  | 0.02  |
| Thailand   | G0971     | 1              | 1.00 | 0.99 | 0.97 | 0.94 | 0.91 | 0.87 | 0.83 | 0.79 | 0.75 | 0.71  | 0.63  | 0.55  | 0.49  | 0.44  | 0.39  | 0.30  | 0.23  |
| Thailand   | G0974     | 1              | 1.00 | 0.98 | 0.94 | 0.90 | 0.85 | 0.81 | 0.75 | 0.70 | 0.66 | 0.61  | 0.51  | 0.43  | 0.36  | 0.29  | 0.23  | 0.13  | 0.09  |
| Thailand   | G0975     | 1              | 1.00 | 0.98 | 0.94 | 0.90 | 0.85 | 0.81 | 0.75 | 0.70 | 0.66 | 0.61  | 0.51  | 0.43  | 0.36  | 0.29  | 0.23  | 0.13  | 0.09  |
| Thailand   | G0978     | 1              | 0.99 | 0.94 | 0.86 | 0.77 | 0.69 | 0.61 | 0.53 | 0.47 | 0.41 | 0.35  | 0.27  | 0.20  | 0.14  | 0.09  | 0.05  | -0.02 | -0.05 |
| Thailand   | G0980     | 1              | 0.99 | 0.95 | 0.90 | 0.84 | 0.77 | 0.70 | 0.65 | 0.62 | 0.56 | 0.51  | 0.42  | 0.34  | 0.30  | 0.25  | 0.20  | 0.11  | 0.06  |
| Thailand   | G0981     | 1              | 1.00 | 0.99 | 0.98 | 0.95 | 0.92 | 0.89 | 0.85 | 0.81 | 0.76 | 0.71  | 0.60  | 0.50  | 0.39  | 0.29  | 0.19  | 0.03  | -0.06 |
| Thailand   | G0982     | 1              | 0.99 | 0.93 | 0.86 | 0.79 | 0.72 | 0.65 | 0.59 | 0.53 | 0.47 | 0.41  | 0.32  | 0.27  | 0.21  | 0.16  | 0.12  | 0.05  | 0.01  |
| Thailand   | G0983     | 1              | 0.99 | 0.97 | 0.95 | 0.91 | 0.87 | 0.83 | 0.78 | 0.74 | 0.69 | 0.65  | 0.57  | 0.49  | 0.41  | 0.35  | 0.29  | 0.18  | 0.11  |
| Thailand   | G0984     | 1              | 1.00 | 0.98 | 0.96 | 0.93 | 0.90 | 0.85 | 0.80 | 0.76 | 0.72 | 0.68  | 0.59  | 0.50  | 0.43  | 0.37  | 0.32  | 0.21  | 0.14  |
| Thailand   | G0985     | 1              | 1.00 | 0.98 | 0.96 | 0.93 | 0.89 | 0.84 | 0.80 | 0.75 | 0.70 | 0.66  | 0.56  | 0.48  | 0.40  | 0.33  | 0.26  | 0.16  | 0.11  |
| Thailand   | G0992     | 1              | 0.94 | 0.82 | 0.72 | 0.63 | 0.58 | 0.52 | 0.49 | 0.43 | 0.40 | 0.36  | 0.32  | 0.30  | 0.31  | 0.27  | 0.27  | 0.21  | 0.20  |
| Thailand   | G0993     | 1              | 1.00 | 0.99 | 0.98 | 0.96 | 0.93 | 0.89 | 0.85 | 0.80 | 0.76 | 0.71  | 0.62  | 0.53  | 0.45  | 0.37  | 0.30  | 0.18  | 0.12  |
| Thailand   | G1730     | 1              | 1.00 | 0.99 | 0.97 | 0.94 | 0.91 | 0.87 | 0.82 | 0.78 | 0.73 | 0.68  | 0.57  | 0.46  | 0.35  | 0.25  | 0.15  | 0.01  | -0.08 |
| Thailand   | G1780     | 1              | 0.99 | 0.98 | 0.94 | 0.88 | 0.81 | 0.75 | 0.68 | 0.62 | 0.56 | 0.50  | 0.38  | 0.29  | 0.21  | 0.14  | 0.10  | 0.05  | 0.02  |
| Thailand   | G1781     | 1              | 0.99 | 0.95 | 0.91 | 0.87 | 0.83 | 0.79 | 0.74 | 0.71 | 0.67 | 0.63  | 0.56  | 0.50  | 0.45  | 0.40  | 0.37  | 0.30  | 0.26  |

| Country      | GloFAS ID | Station filter | LT1  | LT2  | LT3  | LT4  | LT5  | LT6   | LT7   | LT8   | LT9   | LT10  | LT12  | LT14  | LT16  | LT18  | LT20  | LT25  | L30   |
|--------------|-----------|----------------|------|------|------|------|------|-------|-------|-------|-------|-------|-------|-------|-------|-------|-------|-------|-------|
| Thailand     | G4597     | 1              | 0.98 | 0.92 | 0.86 | 0.81 | 0.75 | 0.70  | 0.66  | 0.62  | 0.58  | 0.54  | 0.48  | 0.41  | 0.36  | 0.31  | 0.27  | 0.22  | 0.17  |
| Thailand     | G4679     | 1              | 1.00 | 0.99 | 0.98 | 0.96 | 0.94 | 0.92  | 0.90  | 0.89  | 0.87  | 0.85  | 0.81  | 0.78  | 0.74  | 0.70  | 0.67  | 0.58  | 0.50  |
| Thailand     | G4682     | 1              | 0.96 | 0.91 | 0.87 | 0.84 | 0.81 | 0.79  | 0.76  | 0.74  | 0.71  | 0.69  | 0.65  | 0.61  | 0.58  | 0.56  | 0.53  | 0.47  | 0.39  |
| Thailand     | G4712     | 1              | 0.99 | 0.95 | 0.89 | 0.80 | 0.72 | 0.65  | 0.59  | 0.54  | 0.49  | 0.44  | 0.36  | 0.29  | 0.24  | 0.19  | 0.17  | 0.14  | 0.11  |
| Thailand     | G4776     | 1              | 0.99 | 0.97 | 0.95 | 0.92 | 0.88 | 0.84  | 0.80  | 0.74  | 0.68  | 0.61  | 0.49  | 0.37  | 0.25  | 0.15  | 0.07  | -0.05 | -0.13 |
| Thailand     | G4797     | 1              | 0.98 | 0.94 | 0.90 | 0.87 | 0.83 | 0.79  | 0.75  | 0.71  | 0.68  | 0.64  | 0.58  | 0.52  | 0.46  | 0.42  | 0.38  | 0.31  | 0.27  |
| Thailand     | G4864     | 1              | 1.00 | 0.99 | 0.98 | 0.96 | 0.93 | 0.89  | 0.85  | 0.81  | 0.76  | 0.72  | 0.61  | 0.50  | 0.40  | 0.29  | 0.19  | 0.03  | -0.07 |
| Thailand     | G4873     | 1              | 0.70 | 0.45 | 0.29 | 0.14 | 0.02 | -0.08 | -0.18 | -0.26 | -0.32 | -0.36 | -0.47 | -0.55 | -0.54 | -0.39 | -0.33 | -0.26 | -0.24 |
| Thailand     | G4896     | 1              | 0.97 | 0.89 | 0.79 | 0.70 | 0.62 | 0.54  | 0.48  | 0.42  | 0.35  | 0.30  | 0.22  | 0.15  | 0.07  | 0.04  | 0.02  | -0.03 | -0.07 |
| Thailand     | G4897     | 1              | 0.98 | 0.94 | 0.89 | 0.82 | 0.75 | 0.69  | 0.63  | 0.56  | 0.50  | 0.44  | 0.35  | 0.26  | 0.21  | 0.15  | 0.11  | 0.04  | 0.01  |
| Thailand     | G4910     | 1              | 0.82 | 0.69 | 0.58 | 0.51 | 0.47 | 0.41  | 0.37  | 0.34  | 0.34  | 0.30  | 0.29  | 0.24  | 0.26  | 0.24  | 0.24  | 0.18  | 0.15  |
| Turkey       | G0684     | 1              | 0.85 | 0.69 | 0.60 | 0.53 | 0.46 | 0.40  | 0.32  | 0.23  | 0.17  | 0.10  | -0.01 | -0.11 | -0.19 | -0.30 | -0.38 | -0.41 | -0.37 |
| Turkey       | G0689     | 1              | 1.00 | 0.99 | 0.99 | 0.98 | 0.97 | 0.96  | 0.94  | 0.93  | 0.90  | 0.88  | 0.84  | 0.79  | 0.75  | 0.72  | 0.69  | 0.65  | 0.62  |
| Turkey       | G0697     | 1              | 0.97 | 0.91 | 0.86 | 0.80 | 0.74 | 0.69  | 0.64  | 0.60  | 0.56  | 0.53  | 0.47  | 0.43  | 0.39  | 0.35  | 0.29  | 0.12  | -0.01 |
| Turkey       | G0704     | 1              | 0.99 | 0.97 | 0.94 | 0.91 | 0.88 | 0.84  | 0.81  | 0.78  | 0.75  | 0.72  | 0.66  | 0.62  | 0.58  | 0.53  | 0.48  | 0.37  | 0.28  |
| Turkey       | G0719     | 1              | 0.99 | 0.95 | 0.90 | 0.86 | 0.82 | 0.77  | 0.73  | 0.70  | 0.66  | 0.62  | 0.55  | 0.50  | 0.45  | 0.41  | 0.37  | 0.27  | 0.19  |
| Turkey       | G0720     | 1              | 0.98 | 0.92 | 0.84 | 0.75 | 0.68 | 0.62  | 0.57  | 0.54  | 0.50  | 0.47  | 0.41  | 0.35  | 0.30  | 0.28  | 0.26  | 0.19  | 0.14  |
| Turkey       | G0738     | 1              | 0.95 | 0.88 | 0.83 | 0.78 | 0.74 | 0.70  | 0.68  | 0.66  | 0.64  | 0.63  | 0.58  | 0.49  | 0.39  | 0.30  | 0.22  | 0.03  | -0.09 |
| Turkey       | G0762     | 1              | 0.99 | 0.95 | 0.89 | 0.83 | 0.78 | 0.74  | 0.71  | 0.68  | 0.66  | 0.63  | 0.58  | 0.52  | 0.47  | 0.44  | 0.40  | 0.32  | 0.29  |
| Turkey       | G0765     | 1              | 0.95 | 0.87 | 0.80 | 0.74 | 0.68 | 0.62  | 0.56  | 0.49  | 0.43  | 0.39  | 0.32  | 0.26  | 0.20  | 0.18  | 0.15  | 0.08  | 0.06  |
| Turkey       | G0792     | 1              | 0.99 | 0.97 | 0.92 | 0.86 | 0.79 | 0.72  | 0.66  | 0.59  | 0.52  | 0.45  | 0.34  | 0.25  | 0.18  | 0.11  | 0.06  | 0.03  | 0.05  |
| Turkey       | G0803     | 1              | 0.92 | 0.82 | 0.73 | 0.64 | 0.55 | 0.49  | 0.43  | 0.33  | 0.29  | 0.24  | 0.12  | 0.08  | 0.03  | 0.01  | -0.02 | 0.00  | -0.01 |
| Turkey       | G0808     | 1              | 0.96 | 0.90 | 0.82 | 0.75 | 0.68 | 0.61  | 0.55  | 0.49  | 0.42  | 0.37  | 0.28  | 0.19  | 0.13  | 0.09  | 0.06  | 0.02  | 0.03  |
| Turkey       | G3916     | 1              | 1.00 | 0.98 | 0.97 | 0.93 | 0.87 | 0.82  | 0.75  | 0.67  | 0.59  | 0.52  | 0.37  | 0.26  | 0.16  | 0.10  | 0.04  | -0.05 | -0.09 |
| Turkey       | G3920     | 1              | 0.99 | 0.94 | 0.87 | 0.82 | 0.79 | 0.74  | 0.68  | 0.63  | 0.58  | 0.53  | 0.45  | 0.39  | 0.34  | 0.30  | 0.28  | 0.27  | 0.26  |
| Turkey       | G3941     | 1              | 0.97 | 0.91 | 0.83 | 0.74 | 0.65 | 0.57  | 0.50  | 0.44  | 0.38  | 0.34  | 0.25  | 0.19  | 0.16  | 0.12  | 0.07  | -0.05 | -0.11 |
| Turkey       | G3942     | 1              | 0.99 | 0.97 | 0.94 | 0.91 | 0.87 | 0.84  | 0.81  | 0.79  | 0.77  | 0.75  | 0.70  | 0.64  | 0.58  | 0.49  | 0.39  | 0.13  | -0.06 |
| Turkey       | G3954     | 1              | 1.00 | 0.98 | 0.96 | 0.94 | 0.92 | 0.89  | 0.87  | 0.86  | 0.84  | 0.83  | 0.80  | 0.77  | 0.76  | 0.74  | 0.72  | 0.68  | 0.65  |
| Turkey       | G3964     | 1              | 0.99 | 0.96 | 0.90 | 0.84 | 0.78 | 0.72  | 0.66  | 0.59  | 0.54  | 0.50  | 0.42  | 0.37  | 0.33  | 0.30  | 0.25  | 0.12  | 0.02  |
| Turkey       | G3977     | 1              | 0.99 | 0.93 | 0.80 | 0.65 | 0.50 | 0.35  | 0.21  | 0.08  | -0.03 | -0.13 | -0.29 | -0.40 | -0.50 | -0.54 | -0.56 | -0.52 | -0.46 |
| Turkey       | G3985     | 1              | 0.99 | 0.96 | 0.94 | 0.91 | 0.88 | 0.85  | 0.80  | 0.73  | 0.65  | 0.56  | 0.38  | 0.23  | 0.12  | 0.03  | -0.06 | -0.27 | -0.30 |
| Turkey       | G3995     | 1              | 0.99 | 0.95 | 0.91 | 0.87 | 0.83 | 0.80  | 0.77  | 0.74  | 0.71  | 0.67  | 0.61  | 0.54  | 0.47  | 0.43  | 0.40  | 0.31  | 0.24  |
| Turkey       | G4002     | 1              | 1.00 | 0.99 | 0.98 | 0.96 | 0.94 | 0.92  | 0.90  | 0.87  | 0.84  | 0.79  | 0.70  | 0.61  | 0.53  | 0.46  | 0.40  | 0.30  | 0.19  |
| Turkey       | G4041     | 1              | 0.99 | 0.95 | 0.89 | 0.83 | 0.77 | 0.73  | 0.70  | 0.67  | 0.64  | 0.62  | 0.58  | 0.51  | 0.42  | 0.35  | 0.27  | 0.09  | -0.03 |
| Turkey       | G4045     | 1              | 1.00 | 0.98 | 0.95 | 0.90 | 0.86 | 0.83  | 0.79  | 0.76  | 0.73  | 0.70  | 0.64  | 0.58  | 0.52  | 0.48  | 0.45  | 0.38  | 0.34  |
| Turkey       | G4046     | 1              | 0.93 | 0.79 | 0.67 | 0.59 | 0.53 | 0.48  | 0.44  | 0.41  | 0.37  | 0.34  | 0.27  | 0.21  | 0.18  | 0.20  | 0.21  | 0.19  | 0.19  |
| Turkey       | G4063     | 1              | 1.00 | 0.99 | 0.99 | 0.99 | 0.98 | 0.98  | 0.98  | 0.97  | 0.97  | 0.97  | 0.96  | 0.95  | 0.95  | 0.94  | 0.93  | 0.91  | 0.89  |
| Turkey       | G4084     | 1              | 0.95 | 0.84 | 0.75 | 0.69 | 0.64 | 0.59  | 0.55  | 0.50  | 0.47  | 0.44  | 0.38  | 0.33  | 0.30  | 0.30  | 0.30  | 0.28  | 0.28  |
| Turkmenistan | G0778     | 1              | 1.00 | 1.00 | 1.00 | 1.00 | 1.00 | 0.99  | 0.97  | 0.95  | 0.91  | 0.86  | 0.74  | 0.61  | 0.49  | 0.38  | 0.28  | -0.05 | -0.29 |

| Country      | GloFAS ID | Station filter | LT1  | LT2  | LT3  | LT4   | LT5   | LT6   | LT7   | LT8   | LT9   | LT10  | LT12  | LT14  | LT16  | LT18  | LT20  | LT25  | L30   |
|--------------|-----------|----------------|------|------|------|-------|-------|-------|-------|-------|-------|-------|-------|-------|-------|-------|-------|-------|-------|
| Turkmenistan | G4003     | 1              | 1.00 | 0.99 | 0.99 | 0.99  | 0.98  | 0.98  | 0.98  | 0.97  | 0.97  | 0.96  | 0.95  | 0.94  | 0.93  | 0.92  | 0.91  | 0.89  | 0.86  |
| Turkmenistan | G4010     | 1              | 1.00 | 1.00 | 1.00 | 0.98  | 0.97  | 0.94  | 0.92  | 0.89  | 0.85  | 0.82  | 0.74  | 0.65  | 0.55  | 0.44  | 0.34  | 0.16  | 0.07  |
| Turkmenistan | G4017     | 1              | 1.00 | 1.00 | 1.00 | 1.00  | 1.00  | 0.99  | 0.99  | 0.97  | 0.94  | 0.90  | 0.81  | 0.69  | 0.58  | 0.46  | 0.36  | 0.06  | -0.21 |
| Turkmenistan | G4022     | 1              | 0.99 | 0.99 | 0.99 | 0.97  | 0.98  | 0.95  | 0.97  | 0.94  | 0.95  | 0.92  | 0.88  | 0.90  | 0.91  | 0.88  | 0.87  | 0.56  | -0.09 |
| Turkmenistan | G4029     | 1              | 1.00 | 1.00 | 1.00 | 1.00  | 0.99  | 0.97  | 0.92  | 0.85  | 0.76  | 0.66  | 0.48  | 0.36  | 0.25  | 0.16  | 0.09  | 0.00  | 0.04  |
| Turkmenistan | G4035     | 1              | 1.00 | 1.00 | 1.00 | 1.00  | 1.00  | 0.99  | 0.98  | 0.96  | 0.93  | 0.88  | 0.77  | 0.64  | 0.52  | 0.40  | 0.30  | -0.01 | -0.26 |
| Turkmenistan | G4050     | 1              | 1.00 | 1.00 | 1.00 | 0.99  | 0.98  | 0.96  | 0.93  | 0.90  | 0.86  | 0.82  | 0.71  | 0.60  | 0.48  | 0.39  | 0.31  | 0.17  | 0.12  |
| Turkmenistan | G4051     | 1              | 1.00 | 1.00 | 1.00 | 1.00  | 0.99  | 0.98  | 0.96  | 0.93  | 0.90  | 0.86  | 0.75  | 0.63  | 0.52  | 0.44  | 0.36  | 0.22  | 0.17  |
| Turkmenistan | G4052     | 0              | -    | -    | -    | -     | -     | -     | -     | -     | -     | -     | -     | -     | -     | -     | -     | -     | -     |
| Turkmenistan | G4053     | 0              | -    | -    | -    | -     | -     | -     | -     | -     | -     | -     | -     | -     | -     | -     | -     | -     | -     |
| Turkmenistan | G4057     | 1              | 0.98 | 0.88 | 0.72 | 0.55  | 0.40  | 0.26  | 0.13  | 0.03  | -0.06 | -0.13 | -0.24 | -0.32 | -0.38 | -0.40 | -0.37 | -0.29 | -0.22 |
| Turkmenistan | G4058     | 1              | 1.00 | 0.98 | 0.93 | 0.83  | 0.70  | 0.56  | 0.42  | 0.29  | 0.17  | 0.07  | -0.09 | -0.21 | -0.29 | -0.35 | -0.38 | -0.34 | -0.27 |
| Turkmenistan | G4059     | 1              | 1.00 | 1.00 | 1.00 | 1.00  | 1.00  | 1.00  | 0.99  | 0.99  | 0.98  | 0.95  | 0.87  | 0.77  | 0.69  | 0.63  | 0.57  | 0.46  | 0.35  |
| Turkmenistan | G4060     | 1              | 1.00 | 1.00 | 1.00 | 1.00  | 1.00  | 0.99  | 0.99  | 0.97  | 0.95  | 0.90  | 0.80  | 0.71  | 0.64  | 0.58  | 0.53  | 0.41  | 0.31  |
| Turkmenistan | G4061     | 1              | 1.00 | 1.00 | 1.00 | 1.00  | 1.00  | 0.99  | 0.98  | 0.96  | 0.93  | 0.88  | 0.77  | 0.68  | 0.62  | 0.56  | 0.52  | 0.39  | 0.29  |
| Turkmenistan | G4062     | 0              | -    | -    | -    | -     | -     | -     | -     | -     | -     | -     | -     | -     | -     | -     | -     | -     | -     |
| Turkmenistan | G4064     | 1              | 1.00 | 1.00 | 1.00 | 0.99  | 0.96  | 0.93  | 0.88  | 0.83  | 0.77  | 0.71  | 0.56  | 0.43  | 0.33  | 0.24  | 0.16  | 0.06  | 0.08  |
| Turkmenistan | G4065     | 0              | -    | -    | -    | -     | -     | -     | -     | -     | -     | -     | -     | -     | -     | -     | -     | -     | -     |
| Turkmenistan | G4089     | 1              | 1.00 | 1.00 | 0.99 | 0.99  | 0.97  | 0.94  | 0.89  | 0.84  | 0.77  | 0.70  | 0.58  | 0.46  | 0.35  | 0.25  | 0.14  | -0.21 | -0.35 |
| Turkmenistan | G4091     | 1              | 1.00 | 1.00 | 0.99 | 0.98  | 0.93  | 0.85  | 0.74  | 0.62  | 0.49  | 0.36  | 0.14  | 0.01  | -0.06 | -0.13 | -0.19 | -0.19 | -0.10 |
| Turkmenistan | G4098     | 1              | 1.00 | 0.98 | 0.92 | 0.79  | 0.66  | 0.55  | 0.44  | 0.34  | 0.26  | 0.20  | 0.11  | 0.06  | 0.01  | -0.02 | 0.00  | 0.11  | 0.11  |
| Turkmenistan | G4099     | 1              | 1.00 | 0.99 | 0.96 | 0.90  | 0.81  | 0.71  | 0.62  | 0.53  | 0.46  | 0.39  | 0.30  | 0.23  | 0.18  | 0.14  | 0.16  | 0.27  | 0.30  |
| Turkmenistan | G4149     | 1              | 0.99 | 0.94 | 0.84 | 0.72  | 0.60  | 0.52  | 0.45  | 0.38  | 0.33  | 0.30  | 0.24  | 0.22  | 0.19  | 0.19  | 0.22  | 0.29  | 0.27  |
| Turkmenistan | G4150     | 1              | 1.00 | 0.97 | 0.90 | 0.78  | 0.64  | 0.49  | 0.37  | 0.26  | 0.17  | 0.09  | -0.02 | -0.09 | -0.15 | -0.18 | -0.15 | 0.00  | 0.04  |
| Uzbekistan   | G3917     | 1              | 1.00 | 0.99 | 0.96 | 0.91  | 0.83  | 0.74  | 0.66  | 0.59  | 0.53  | 0.49  | 0.39  | 0.33  | 0.27  | 0.22  | 0.15  | 0.01  | 0.02  |
| Uzbekistan   | G3930     | 1              | 0.96 | 0.77 | 0.60 | 0.49  | 0.41  | 0.35  | 0.31  | 0.26  | 0.21  | 0.16  | 0.07  | -0.02 | -0.10 | -0.14 | -0.17 | -0.20 | -0.21 |
| Uzbekistan   | G3937     | 1              | 0.84 | 0.44 | 0.14 | -0.07 | -0.21 | -0.28 | -0.33 | -0.38 | -0.41 | -0.44 | -0.53 | -0.59 | -0.62 | -0.55 | -0.55 | -0.60 | -0.68 |
| Uzbekistan   | G3943     | 1              | 0.99 | 0.94 | 0.89 | 0.81  | 0.70  | 0.59  | 0.49  | 0.39  | 0.31  | 0.25  | 0.13  | 0.04  | -0.06 | -0.10 | -0.12 | -0.20 | -0.29 |
| Uzbekistan   | G3944     | 1              | 0.96 | 0.76 | 0.51 | 0.29  | 0.11  | -0.01 | -0.09 | -0.16 | -0.21 | -0.25 | -0.34 | -0.38 | -0.42 | -0.43 | -0.44 | -0.38 | -0.38 |
| Uzbekistan   | G3991     | 1              | 1.00 | 1.00 | 0.99 | 0.97  | 0.92  | 0.82  | 0.69  | 0.55  | 0.42  | 0.33  | 0.21  | 0.13  | 0.08  | 0.03  | 0.00  | -0.02 | 0.02  |
| Uzbekistan   | G3996     | 1              | 1.00 | 1.00 | 1.00 | 0.99  | 0.97  | 0.92  | 0.85  | 0.74  | 0.61  | 0.48  | 0.23  | 0.04  | -0.11 | -0.23 | -0.33 | -0.39 | -0.30 |
| Uzbekistan   | G3997     | 1              | 1.00 | 1.00 | 0.99 | 0.99  | 0.97  | 0.93  | 0.88  | 0.82  | 0.75  | 0.69  | 0.59  | 0.51  | 0.44  | 0.38  | 0.35  | 0.25  | 0.19  |
| Uzbekistan   | G4004     | 1              | 1.00 | 1.00 | 0.99 | 0.98  | 0.95  | 0.88  | 0.78  | 0.65  | 0.51  | 0.37  | 0.12  | -0.06 | -0.20 | -0.32 | -0.40 | -0.42 | -0.31 |
| Uzbekistan   | G4095     | 1              | 0.99 | 0.94 | 0.88 | 0.81  | 0.73  | 0.65  | 0.56  | 0.49  | 0.41  | 0.34  | 0.20  | 0.08  | -0.03 | -0.10 | -0.13 | -0.17 | -0.21 |
| Uzbekistan   | G4101     | 1              | 1.00 | 1.00 | 0.98 | 0.95  | 0.90  | 0.84  | 0.77  | 0.69  | 0.63  | 0.57  | 0.45  | 0.34  | 0.23  | 0.14  | -0.01 | -0.34 | -0.43 |
| Vietnam      | G0941     | 1              | 0.85 | 0.75 | 0.66 | 0.58  | 0.52  | 0.48  | 0.43  | 0.38  | 0.36  | 0.32  | 0.26  | 0.21  | 0.19  | 0.17  | 0.17  | 0.12  | 0.11  |
| Vietnam      | G0943     | 1              | 0.99 | 0.92 | 0.82 | 0.73  | 0.64  | 0.56  | 0.49  | 0.44  | 0.38  | 0.33  | 0.26  | 0.19  | 0.13  | 0.10  | 0.09  | 0.07  | 0.05  |
| Vietnam      | G0956     | 1              | 0.93 | 0.80 | 0.72 | 0.63  | 0.59  | 0.53  | 0.47  | 0.42  | 0.37  | 0.34  | 0.24  | 0.17  | 0.12  | 0.08  | 0.06  | 0.04  | 0.04  |
| Vietnam      | G0972     | 1              | 0.92 | 0.81 | 0.71 | 0.63  | 0.58  | 0.53  | 0.48  | 0.44  | 0.40  | 0.36  | 0.27  | 0.21  | 0.17  | 0.13  | 0.09  | 0.02  | -0.01 |

| Country | GloFAS ID | Station filter | LT1  | LT2  | LT3  | LT4   | LT5    | LT6   | LT7    | LT8    | LT9    | LT10   | LT12   | LT14   | LT16  | LT18  | LT20  | LT25  | L30    |
|---------|-----------|----------------|------|------|------|-------|--------|-------|--------|--------|--------|--------|--------|--------|-------|-------|-------|-------|--------|
| Vietnam | G0987     | 1              | 0.91 | 0.80 | 0.71 | 0.64  | 0.59   | 0.54  | 0.50   | 0.45   | 0.40   | 0.37   | 0.29   | 0.24   | 0.17  | 0.12  | 0.08  | 0.02  | 0.00   |
| Vietnam | G0997     | 1              | 0.92 | 0.83 | 0.74 | 0.68  | 0.64   | 0.60  | 0.54   | 0.51   | 0.47   | 0.43   | 0.36   | 0.31   | 0.27  | 0.23  | 0.20  | 0.13  | 0.11   |
| Vietnam | G1021     | 1              | 0.97 | 0.91 | 0.84 | 0.77  | 0.69   | 0.64  | 0.60   | 0.55   | 0.51   | 0.48   | 0.41   | 0.36   | 0.31  | 0.28  | 0.25  | 0.21  | 0.17   |
| Vietnam | G1025     | 1              | 0.96 | 0.88 | 0.80 | 0.72  | 0.64   | 0.59  | 0.56   | 0.51   | 0.47   | 0.44   | 0.38   | 0.34   | 0.30  | 0.29  | 0.29  | 0.24  | 0.23   |
| Vietnam | G1030     | 1              | 0.91 | 0.80 | 0.70 | 0.62  | 0.55   | 0.51  | 0.47   | 0.42   | 0.39   | 0.37   | 0.30   | 0.28   | 0.26  | 0.27  | 0.26  | 0.20  | 0.19   |
| Vietnam | G1033     | 1              | 0.89 | 0.77 | 0.68 | 0.61  | 0.54   | 0.51  | 0.47   | 0.42   | 0.39   | 0.37   | 0.31   | 0.28   | 0.25  | 0.26  | 0.26  | 0.23  | 0.20   |
| Vietnam | G1052     | 1              | 0.77 | 0.67 | 0.60 | 0.52  | 0.46   | 0.46  | 0.45   | 0.39   | 0.38   | 0.35   | 0.29   | 0.31   | 0.25  | 0.19  | 0.12  | 0.00  | -0.06  |
| Vietnam | G4646     | 1              | 0.96 | 0.86 | 0.76 | 0.65  | 0.56   | 0.50  | 0.43   | 0.37   | 0.32   | 0.28   | 0.20   | 0.14   | 0.09  | 0.05  | 0.04  | 0.01  | 0.00   |
| Vietnam | G4647     | 1              | 0.95 | 0.84 | 0.74 | 0.64  | 0.57   | 0.50  | 0.42   | 0.36   | 0.32   | 0.28   | 0.21   | 0.16   | 0.09  | 0.02  | -0.02 | -0.05 | -0.08  |
| Vietnam | G4680     | 1              | 0.99 | 0.96 | 0.91 | 0.84  | 0.76   | 0.69  | 0.63   | 0.58   | 0.52   | 0.47   | 0.38   | 0.30   | 0.25  | 0.20  | 0.15  | 0.10  | 0.08   |
| Vietnam | G4963     | 1              | 1.00 | 1.00 | 0.99 | 0.99  | 0.98   | 0.97  | 0.95   | 0.93   | 0.91   | 0.88   | 0.81   | 0.73   | 0.64  | 0.55  | 0.45  | 0.21  | 0.07   |
| Vietnam | G4966     | 1              | 0.98 | 0.94 | 0.89 | 0.84  | 0.79   | 0.74  | 0.68   | 0.63   | 0.58   | 0.54   | 0.45   | 0.39   | 0.32  | 0.25  | 0.20  | 0.11  | 0.02   |
| Yemen   | G4770     | 1              | 0.99 | 0.98 | 0.95 | -4.29 | -76.26 | -     | -75.83 | -60.13 | -56.11 | -67.64 | -86.62 | -99.16 | -     | -     | -     | -     | -81.66 |
| Yemen   | G4775     | 1              | 1.00 | 1.00 | 0.96 | 0.61  | -0.29  | -0.57 | -0.43  | -0.32  | -0.26  | -0.51  | -0.90  | -0.76  | -0.83 | -1.02 | -1.40 | -0.54 | -0.31  |

Table 3: GloFAS climatology skill scores for Australia-Oceania.

| Country   | GloFAS ID | Station filter | LT1  | LT2  | LT3  | LT4  | LT5  | LT6  | LT7  | LT8  | LT9  | LT10 | LT12 | LT14 | LT16 | LT18 | LT20 | LT25 | L30  |
|-----------|-----------|----------------|------|------|------|------|------|------|------|------|------|------|------|------|------|------|------|------|------|
| Australia | G1325     | 1              | 1.00 | 0.98 | 0.95 | 0.91 | 0.87 | 0.82 | 0.78 | 0.74 | 0.69 | 0.65 | 0.59 | 0.54 | 0.49 | 0.44 | 0.41 | 0.33 | 0.29 |
| Australia | G1333     | 1              | 0.98 | 0.91 | 0.79 | 0.68 | 0.60 | 0.53 | 0.48 | 0.46 | 0.43 | 0.41 | 0.38 | 0.34 | 0.33 | 0.31 | 0.29 | 0.27 | 0.27 |
| Australia | G1337     | 1              | 0.99 | 0.95 | 0.89 | 0.83 | 0.77 | 0.72 | 0.67 | 0.63 | 0.59 | 0.55 | 0.49 | 0.44 | 0.41 | 0.37 | 0.34 | 0.28 | 0.23 |
| Australia | G1347     | 1              | 0.97 | 0.91 | 0.84 | 0.75 | 0.66 | 0.58 | 0.52 | 0.45 | 0.40 | 0.38 | 0.32 | 0.29 | 0.25 | 0.25 | 0.23 | 0.22 | 0.19 |
| Australia | G1349     | 1              | 1.00 | 0.96 | 0.87 | 0.80 | 0.74 | 0.71 | 0.68 | 0.67 | 0.66 | 0.65 | 0.64 | 0.63 | 0.63 | 0.60 | 0.57 | 0.54 | 0.52 |
| Australia | G1356     | 1              | 0.94 | 0.71 | 0.53 | 0.41 | 0.34 | 0.29 | 0.25 | 0.24 | 0.22 | 0.21 | 0.20 | 0.20 | 0.20 | 0.14 | 0.11 | 0.07 | 0.07 |
| Australia | G1358     | 1              | 0.99 | 0.93 | 0.88 | 0.82 | 0.76 | 0.71 | 0.68 | 0.64 | 0.60 | 0.58 | 0.51 | 0.46 | 0.40 | 0.37 | 0.34 | 0.28 | 0.23 |
| Australia | G1360     | 1              | 0.96 | 0.81 | 0.62 | 0.48 | 0.39 | 0.34 | 0.28 | 0.24 | 0.22 | 0.20 | 0.17 | 0.15 | 0.15 | 0.20 | 0.22 | 0.23 | 0.22 |
| Australia | G1365     | 1              | 0.92 | 0.78 | 0.62 | 0.47 | 0.39 | 0.30 | 0.23 | 0.18 | 0.14 | 0.11 | 0.06 | 0.03 | 0.02 | 0.07 | 0.10 | 0.13 | 0.13 |
| Australia | G1371     | 1              | 0.94 | 0.87 | 0.79 | 0.72 | 0.67 | 0.63 | 0.55 | 0.53 | 0.53 | 0.48 | 0.45 | 0.40 | 0.39 | 0.34 | 0.35 | 0.27 | 0.26 |
| Australia | G1377     | 1              | 0.99 | 0.91 | 0.75 | 0.61 | 0.53 | 0.47 | 0.43 | 0.41 | 0.41 | 0.39 | 0.36 | 0.36 | 0.36 | 0.32 | 0.30 | 0.28 | 0.26 |
| Australia | G1379     | 1              | 1.00 | 0.99 | 0.96 | 0.92 | 0.91 | 0.88 | 0.83 | 0.78 | 0.73 | 0.67 | 0.60 | 0.54 | 0.48 | 0.44 | 0.42 | 0.35 | 0.29 |
| Australia | G1380     | 1              | 0.93 | 0.87 | 0.80 | 0.74 | 0.70 | 0.66 | 0.64 | 0.62 | 0.57 | 0.54 | 0.51 | 0.44 | 0.41 | 0.39 | 0.37 | 0.32 | 0.29 |
| Australia | G1383     | 1              | 1.00 | 0.99 | 0.98 | 0.95 | 0.87 | 0.81 | 0.76 | 0.69 | 0.64 | 0.61 | 0.53 | 0.48 | 0.43 | 0.42 | 0.37 | 0.32 | 0.25 |
| Australia | G1384     | 1              | 0.88 | 0.67 | 0.61 | 0.59 | 0.52 | 0.48 | 0.47 | 0.45 | 0.37 | 0.38 | 0.34 | 0.32 | 0.27 | 0.31 | 0.28 | 0.26 | 0.21 |
| Australia | G1385     | 1              | 0.94 | 0.87 | 0.76 | 0.67 | 0.59 | 0.52 | 0.48 | 0.45 | 0.43 | 0.40 | 0.35 | 0.34 | 0.32 | 0.29 | 0.28 | 0.25 | 0.23 |
| Australia | G1386     | 1              | 0.90 | 0.84 | 0.81 | 0.75 | 0.69 | 0.67 | 0.65 | 0.59 | 0.58 | 0.60 | 0.54 | 0.56 | 0.50 | 0.53 | 0.51 | 0.49 | 0.45 |
| Australia | G1390     | 1              | 0.89 | 0.81 | 0.77 | 0.68 | 0.57 | 0.59 | 0.58 | 0.53 | 0.44 | 0.50 | 0.42 | 0.47 | 0.39 | 0.45 | 0.43 | 0.43 | 0.36 |
| Australia | G1396     | 1              | 0.99 | 0.98 | 0.95 | 0.93 | 0.89 | 0.86 | 0.83 | 0.80 | 0.77 | 0.74 | 0.69 | 0.63 | 0.57 | 0.52 | 0.48 | 0.39 | 0.32 |

| Country   | GloFAS ID | Station filter | LT1  | LT2  | LT3  | LT4  | LT5  | LT6  | LT7  | LT8  | LT9  | LT10 | LT12 | LT14 | LT16 | LT18 | LT20 | LT25 | L30  |
|-----------|-----------|----------------|------|------|------|------|------|------|------|------|------|------|------|------|------|------|------|------|------|
| Australia | G1397     | 1              | 0.99 | 0.98 | 0.95 | 0.93 | 0.89 | 0.86 | 0.83 | 0.80 | 0.77 | 0.74 | 0.69 | 0.63 | 0.57 | 0.52 | 0.48 | 0.39 | 0.32 |
| Australia | G1402     | 1              | 0.94 | 0.78 | 0.81 | 0.80 | 0.74 | 0.68 | 0.55 | 0.56 | 0.55 | 0.42 | 0.46 | 0.37 | 0.43 | 0.37 | 0.41 | 0.34 | 0.35 |
| Australia | G1407     | 1              | 0.98 | 0.90 | 0.71 | 0.56 | 0.55 | 0.54 | 0.50 | 0.48 | 0.48 | 0.46 | 0.38 | 0.38 | 0.36 | 0.37 | 0.38 | 0.36 | 0.37 |
| Australia | G1419     | 1              | 0.96 | 0.92 | 0.85 | 0.68 | 0.69 | 0.67 | 0.54 | 0.55 | 0.57 | 0.53 | 0.47 | 0.41 | 0.47 | 0.42 | 0.48 | 0.43 | 0.47 |
| Australia | G1421     | 1              | 1.00 | 0.99 | 0.98 | 0.95 | 0.93 | 0.91 | 0.87 | 0.83 | 0.81 | 0.78 | 0.69 | 0.61 | 0.56 | 0.52 | 0.46 | 0.37 | 0.31 |
| Australia | G1432     | 1              | 0.97 | 0.94 | 0.91 | 0.87 | 0.82 | 0.80 | 0.78 | 0.74 | 0.71 | 0.67 | 0.57 | 0.50 | 0.42 | 0.39 | 0.35 | 0.28 | 0.22 |
| Australia | G1435     | 1              | 1.00 | 0.98 | 0.93 | 0.88 | 0.81 | 0.76 | 0.70 | 0.68 | 0.63 | 0.58 | 0.49 | 0.43 | 0.42 | 0.37 | 0.34 | 0.31 | 0.31 |
| Australia | G1448     | 1              | 0.99 | 0.96 | 0.93 | 0.90 | 0.86 | 0.82 | 0.78 | 0.75 | 0.74 | 0.72 | 0.66 | 0.63 | 0.61 | 0.58 | 0.56 | 0.50 | 0.47 |
| Australia | G1451     | 1              | 1.00 | 1.00 | 1.00 | 1.00 | 1.00 | 1.00 | 1.00 | 1.00 | 1.00 | 1.00 | 1.00 | 1.00 | 1.00 | 0.99 | 0.99 | 0.98 | 0.93 |
| Australia | G1452     | 1              | 0.92 | 0.84 | 0.74 | 0.70 | 0.64 | 0.56 | 0.49 | 0.43 | 0.38 | 0.32 | 0.29 | 0.22 | 0.22 | 0.20 | 0.20 | 0.18 | 0.18 |
| Australia | G1456     | 1              | 1.00 | 1.00 | 0.98 | 0.90 | 0.90 | 0.90 | 0.82 | 0.83 | 0.84 | 0.83 | 0.70 | 0.63 | 0.62 | 0.57 | 0.56 | 0.47 | 0.44 |
| Australia | G1458     | 1              | 1.00 | 1.00 | 1.00 | 1.00 | 1.00 | 1.00 | 1.00 | 0.99 | 0.98 | 0.96 | 0.94 | 0.94 | 0.90 | 0.86 | 0.82 | 0.74 | 0.62 |
| Australia | G1462     | 1              | 1.00 | 1.00 | 1.00 | 1.00 | 0.99 | 0.98 | 0.97 | 0.94 | 0.91 | 0.88 | 0.79 | 0.73 | 0.66 | 0.59 | 0.53 | 0.39 | 0.31 |
| Australia | G1463     | 1              | 0.97 | 0.92 | 0.89 | 0.75 | 0.72 | 0.71 | 0.68 | 0.58 | 0.54 | 0.55 | 0.45 | 0.44 | 0.35 | 0.32 | 0.33 | 0.27 | 0.25 |
| Australia | G1464     | 1              | 0.98 | 0.91 | 0.78 | 0.71 | 0.67 | 0.59 | 0.52 | 0.50 | 0.49 | 0.44 | 0.36 | 0.29 | 0.28 | 0.24 | 0.24 | 0.21 | 0.22 |
| Australia | G1467     | 1              | 1.00 | 1.00 | 1.00 | 1.00 | 1.00 | 1.00 | 0.99 | 0.99 | 0.98 | 0.97 | 0.94 | 0.90 | 0.85 | 0.78 | 0.73 | 0.56 | 0.44 |
| Australia | G1468     | 1              | 1.00 | 1.00 | 1.00 | 0.99 | 0.98 | 0.98 | 0.97 | 0.95 | 0.93 | 0.90 | 0.82 | 0.75 | 0.68 | 0.61 | 0.53 | 0.39 | 0.29 |
| Australia | G1470     | 1              | 1.00 | 1.00 | 1.00 | 1.00 | 1.00 | 1.00 | 1.00 | 1.00 | 1.00 | 0.99 | 0.99 | 0.97 | 0.96 | 0.94 | 0.91 | 0.79 | 0.68 |
| Australia | G1474     | 1              | 1.00 | 1.00 | 1.00 | 1.00 | 1.00 | 1.00 | 1.00 | 1.00 | 1.00 | 0.99 | 0.99 | 0.97 | 0.96 | 0.94 | 0.93 | 0.82 | 0.71 |
| Australia | G1482     | 1              | 1.00 | 1.00 | 1.00 | 1.00 | 1.00 | 1.00 | 1.00 | 0.99 | 0.99 | 0.99 | 0.99 | 0.99 | 0.99 | 0.99 | 0.99 | 0.97 | 0.96 |
| Australia | G1484     | 1              | 0.99 | 0.96 | 0.90 | 0.83 | 0.81 | 0.75 | 0.69 | 0.65 | 0.61 | 0.56 | 0.49 | 0.43 | 0.40 | 0.34 | 0.31 | 0.25 | 0.23 |
| Australia | G1485     | 1              | 0.98 | 0.97 | 0.95 | 0.94 | 0.93 | 0.92 | 0.92 | 0.91 | 0.90 | 0.89 | 0.87 | 0.86 | 0.85 | 0.83 | 0.81 | 0.80 | 0.77 |
| Australia | G1486     | 1              | 0.99 | 0.96 | 0.89 | 0.82 | 0.79 | 0.74 | 0.68 | 0.63 | 0.60 | 0.56 | 0.47 | 0.42 | 0.39 | 0.34 | 0.31 | 0.24 | 0.23 |
| Australia | G1487     | 1              | 0.98 | 0.97 | 0.92 | 0.81 | 0.77 | 0.77 | 0.69 | 0.66 | 0.67 | 0.66 | 0.57 | 0.58 | 0.52 | 0.53 | 0.49 | 0.46 | 0.42 |
| Australia | G1492     | 1              | 1.00 | 1.00 | 0.99 | 0.96 | 0.93 | 0.89 | 0.85 | 0.83 | 0.80 | 0.77 | 0.73 | 0.66 | 0.62 | 0.58 | 0.53 | 0.46 | 0.39 |
| Australia | G1494     | 1              | 1.00 | 1.00 | 1.00 | 1.00 | 1.00 | 1.00 | 1.00 | 1.00 | 1.00 | 1.00 | 1.00 | 0.99 | 0.99 | 0.99 | 0.99 | 0.99 | 0.96 |
| Australia | G1495     | 1              | 0.99 | 0.95 | 0.90 | 0.84 | 0.79 | 0.75 | 0.70 | 0.65 | 0.61 | 0.58 | 0.51 | 0.46 | 0.42 | 0.37 | 0.34 | 0.31 | 0.30 |
| Australia | G1497     | 1              | 1.00 | 0.99 | 0.99 | 0.99 | 0.99 | 0.98 | 0.97 | 0.96 | 0.95 | 0.95 | 0.93 | 0.88 | 0.82 | 0.79 | 0.75 | 0.65 | 0.55 |
| Australia | G1498     | 1              | 0.97 | 0.95 | 0.89 | 0.80 | 0.80 | 0.76 | 0.61 | 0.64 | 0.69 | 0.68 | 0.54 | 0.46 | 0.56 | 0.45 | 0.53 | 0.44 | 0.53 |
| Australia | G1499     | 1              | 1.00 | 1.00 | 1.00 | 1.00 | 1.00 | 1.00 | 1.00 | 1.00 | 1.00 | 1.00 | 1.00 | 0.99 | 0.99 | 0.99 | 0.99 | 0.98 | 0.97 |
| Australia | G1500     | 1              | 1.00 | 1.00 | 1.00 | 1.00 | 1.00 | 1.00 | 1.00 | 1.00 | 1.00 | 1.00 | 1.00 | 1.00 | 0.99 | 0.99 | 0.99 | 0.99 | 0.97 |
| Australia | G1502     | 1              | 1.00 | 1.00 | 1.00 | 1.00 | 1.00 | 1.00 | 1.00 | 1.00 | 0.99 | 0.99 | 0.98 | 0.97 | 0.95 | 0.91 | 0.88 | 0.82 | 0.75 |
| Australia | G1503     | 1              | 1.00 | 1.00 | 1.00 | 1.00 | 1.00 | 1.00 | 1.00 | 1.00 | 0.99 | 0.99 | 0.98 | 0.97 | 0.95 | 0.93 | 0.89 | 0.83 | 0.75 |
| Australia | G1504     | 1              | 1.00 | 1.00 | 1.00 | 1.00 | 1.00 | 1.00 | 0.99 | 0.99 | 0.98 | 0.98 | 0.97 | 0.94 | 0.90 | 0.87 | 0.84 | 0.75 | 0.68 |
| Australia | G1506     | 1              | 1.00 | 1.00 | 1.00 | 1.00 | 1.00 | 1.00 | 1.00 | 0.99 | 0.99 | 0.99 | 0.99 | 0.97 | 0.96 | 0.94 | 0.93 | 0.89 | 0.83 |
| Australia | G1507     | 1              | 0.97 | 0.96 | 0.91 | 0.89 | 0.91 | 0.88 | 0.88 | 0.85 | 0.85 | 0.82 | 0.82 | 0.80 | 0.78 | 0.74 | 0.72 | 0.68 | 0.65 |
| Australia | G1508     | 1              | 0.96 | 0.93 | 0.88 | 0.85 | 0.84 | 0.81 | 0.80 | 0.76 | 0.74 | 0.70 | 0.69 | 0.66 | 0.64 | 0.62 | 0.60 | 0.57 | 0.55 |
| Australia | G1510     | 1              | 0.99 | 0.93 | 0.83 | 0.75 | 0.68 | 0.61 | 0.54 | 0.49 | 0.45 | 0.40 | 0.35 | 0.30 | 0.26 | 0.25 | 0.25 | 0.24 | 0.22 |
| Australia | G1511     | 1              | 0.89 | 0.81 | 0.75 | 0.67 | 0.61 | 0.54 | 0.47 | 0.44 | 0.37 | 0.32 | 0.25 | 0.20 | 0.18 | 0.17 | 0.14 | 0.13 | 0.11 |

| Country   | GloFAS ID | Station filter | LT1  | LT2  | LT3  | LT4  | LT5  | LT6  | LT7  | LT8  | LT9  | LT10 | LT12 | LT14 | LT16 | LT18 | LT20 | LT25 | L30  |
|-----------|-----------|----------------|------|------|------|------|------|------|------|------|------|------|------|------|------|------|------|------|------|
| Australia | G1708     | 1              | 0.94 | 0.86 | 0.76 | 0.67 | 0.58 | 0.51 | 0.48 | 0.44 | 0.42 | 0.40 | 0.34 | 0.33 | 0.32 | 0.29 | 0.27 | 0.24 | 0.23 |
| Australia | G1736     | 1              | 0.99 | 0.95 | 0.86 | 0.72 | 0.69 | 0.64 | 0.54 | 0.51 | 0.49 | 0.45 | 0.38 | 0.32 | 0.33 | 0.28 | 0.29 | 0.24 | 0.23 |
| Australia | G1737     | 1              | 0.98 | 0.89 | 0.76 | 0.71 | 0.68 | 0.58 | 0.52 | 0.50 | 0.47 | 0.39 | 0.36 | 0.28 | 0.29 | 0.24 | 0.24 | 0.20 | 0.19 |
| Australia | G1738     | 1              | 0.90 | 0.84 | 0.81 | 0.77 | 0.71 | 0.69 | 0.68 | 0.62 | 0.61 | 0.63 | 0.58 | 0.59 | 0.54 | 0.57 | 0.55 | 0.54 | 0.51 |
| Australia | G1739     | 1              | 1.00 | 1.00 | 0.98 | 0.93 | 0.91 | 0.89 | 0.86 | 0.81 | 0.78 | 0.74 | 0.66 | 0.58 | 0.51 | 0.47 | 0.39 | 0.31 | 0.22 |
| Australia | G1740     | 1              | 1.00 | 0.95 | 0.90 | 0.86 | 0.86 | 0.82 | 0.73 | 0.72 | 0.68 | 0.64 | 0.60 | 0.51 | 0.50 | 0.45 | 0.44 | 0.39 | 0.33 |
| Australia | G1741     | 1              | 1.00 | 1.00 | 0.99 | 0.98 | 0.97 | 0.96 | 0.94 | 0.92 | 0.88 | 0.85 | 0.83 | 0.79 | 0.73 | 0.68 | 0.61 | 0.48 | 0.37 |
| Australia | G1742     | 1              | 1.00 | 1.00 | 1.00 | 1.00 | 0.99 | 0.99 | 0.98 | 0.97 | 0.95 | 0.93 | 0.90 | 0.84 | 0.79 | 0.77 | 0.74 | 0.63 | 0.51 |
| Australia | G1971     | 1              | 1.00 | 1.00 | 0.99 | 0.99 | 0.98 | 0.97 | 0.95 | 0.93 | 0.91 | 0.88 | 0.83 | 0.79 | 0.74 | 0.70 | 0.67 | 0.60 | 0.55 |
| Australia | G1978     | 1              | 1.00 | 1.00 | 1.00 | 1.00 | 1.00 | 1.00 | 1.00 | 1.00 | 1.00 | 0.99 | 0.99 | 0.99 | 0.99 | 0.99 | 0.99 | 0.98 | 0.96 |
| Australia | G5663     | 1              | 1.00 | 0.99 | 0.97 | 0.92 | 0.85 | 0.80 | 0.77 | 0.73 | 0.69 | 0.66 | 0.60 | 0.56 | 0.50 | 0.48 | 0.45 | 0.39 | 0.34 |
| Australia | G5671     | 1              | 1.00 | 0.99 | 0.96 | 0.92 | 0.88 | 0.82 | 0.77 | 0.72 | 0.67 | 0.60 | 0.53 | 0.46 | 0.41 | 0.36 | 0.34 | 0.28 | 0.26 |
| Australia | G5672     | 1              | 0.96 | 0.88 | 0.81 | 0.73 | 0.65 | 0.59 | 0.54 | 0.49 | 0.46 | 0.44 | 0.36 | 0.32 | 0.26 | 0.24 | 0.22 | 0.14 | 0.10 |
| Australia | G5679     | 1              | 0.99 | 0.94 | 0.81 | 0.69 | 0.59 | 0.51 | 0.45 | 0.40 | 0.37 | 0.34 | 0.30 | 0.28 | 0.26 | 0.24 | 0.20 | 0.13 | 0.11 |
| Australia | G5700     | 1              | 0.92 | 0.84 | 0.79 | 0.72 | 0.65 | 0.62 | 0.59 | 0.54 | 0.52 | 0.51 | 0.43 | 0.41 | 0.36 | 0.37 | 0.34 | 0.31 | 0.26 |
| Australia | G5704     | 1              | 0.94 | 0.83 | 0.74 | 0.69 | 0.64 | 0.58 | 0.56 | 0.53 | 0.48 | 0.46 | 0.42 | 0.37 | 0.31 | 0.31 | 0.27 | 0.23 | 0.19 |
| Australia | G5730     | 1              | 0.99 | 0.96 | 0.92 | 0.87 | 0.83 | 0.79 | 0.75 | 0.70 | 0.65 | 0.60 | 0.54 | 0.48 | 0.42 | 0.37 | 0.34 | 0.25 | 0.22 |
| Australia | G5744     | 1              | 0.99 | 0.95 | 0.90 | 0.86 | 0.79 | 0.73 | 0.69 | 0.64 | 0.59 | 0.55 | 0.50 | 0.46 | 0.40 | 0.38 | 0.35 | 0.32 | 0.27 |
| Australia | G5749     | 1              | 0.97 | 0.90 | 0.77 | 0.65 | 0.56 | 0.50 | 0.46 | 0.42 | 0.42 | 0.40 | 0.36 | 0.36 | 0.35 | 0.32 | 0.29 | 0.26 | 0.25 |
| Australia | G5750     | 1              | 0.94 | 0.89 | 0.86 | 0.82 | 0.70 | 0.61 | 0.62 | 0.56 | 0.51 | 0.48 | 0.45 | 0.45 | 0.39 | 0.41 | 0.35 | 0.38 | 0.32 |
| Australia | G5767     | 1              | 1.00 | 0.98 | 0.92 | 0.78 | 0.70 | 0.66 | 0.58 | 0.53 | 0.50 | 0.47 | 0.39 | 0.34 | 0.34 | 0.29 | 0.29 | 0.23 | 0.21 |
| Australia | G5768     | 1              | 1.00 | 1.00 | 0.99 | 0.96 | 0.90 | 0.85 | 0.80 | 0.75 | 0.71 | 0.69 | 0.63 | 0.58 | 0.53 | 0.50 | 0.47 | 0.39 | 0.34 |
| Australia | G5776     | 1              | 0.99 | 0.96 | 0.91 | 0.83 | 0.75 | 0.70 | 0.64 | 0.58 | 0.53 | 0.49 | 0.42 | 0.39 | 0.35 | 0.32 | 0.30 | 0.27 | 0.25 |
| Australia | G5777     | 1              | 1.00 | 0.98 | 0.96 | 0.91 | 0.85 | 0.78 | 0.74 | 0.68 | 0.60 | 0.52 | 0.40 | 0.31 | 0.24 | 0.19 | 0.15 | 0.10 | 0.08 |
| Australia | G5788     | 1              | 1.00 | 0.99 | 0.98 | 0.97 | 0.95 | 0.93 | 0.90 | 0.88 | 0.86 | 0.84 | 0.79 | 0.74 | 0.71 | 0.68 | 0.66 | 0.61 | 0.56 |
| Australia | G5789     | 1              | 1.00 | 0.99 | 0.98 | 0.96 | 0.93 | 0.89 | 0.85 | 0.81 | 0.79 | 0.75 | 0.68 | 0.60 | 0.56 | 0.49 | 0.45 | 0.38 | 0.33 |
| Australia | G5792     | 1              | 1.00 | 0.99 | 0.97 | 0.95 | 0.93 | 0.89 | 0.85 | 0.82 | 0.79 | 0.75 | 0.70 | 0.64 | 0.61 | 0.56 | 0.53 | 0.49 | 0.46 |
| Australia | G5793     | 1              | 1.00 | 1.00 | 0.99 | 0.98 | 0.94 | 0.90 | 0.85 | 0.81 | 0.76 | 0.72 | 0.68 | 0.61 | 0.57 | 0.54 | 0.51 | 0.43 | 0.39 |
| Australia | G5803     | 1              | 1.00 | 0.99 | 0.96 | 0.90 | 0.85 | 0.80 | 0.75 | 0.71 | 0.67 | 0.64 | 0.58 | 0.53 | 0.50 | 0.46 | 0.44 | 0.35 | 0.30 |
| Australia | G5806     | 1              | 1.00 | 0.99 | 0.97 | 0.92 | 0.87 | 0.83 | 0.79 | 0.75 | 0.72 | 0.69 | 0.61 | 0.56 | 0.52 | 0.48 | 0.46 | 0.42 | 0.36 |
| Australia | G5812     | 1              | 0.99 | 0.96 | 0.93 | 0.89 | 0.77 | 0.72 | 0.72 | 0.68 | 0.57 | 0.52 | 0.44 | 0.43 | 0.35 | 0.35 | 0.29 | 0.28 | 0.22 |
| Australia | G5813     | 1              | 0.98 | 0.92 | 0.88 | 0.85 | 0.78 | 0.69 | 0.65 | 0.62 | 0.54 | 0.48 | 0.43 | 0.38 | 0.33 | 0.32 | 0.28 | 0.25 | 0.21 |
| Australia | G5814     | 1              | 0.96 | 0.90 | 0.83 | 0.77 | 0.72 | 0.68 | 0.63 | 0.59 | 0.55 | 0.51 | 0.46 | 0.41 | 0.37 | 0.35 | 0.33 | 0.27 | 0.24 |
| Australia | G5819     | 1              | 1.00 | 0.98 | 0.94 | 0.88 | 0.84 | 0.80 | 0.77 | 0.73 | 0.71 | 0.67 | 0.60 | 0.55 | 0.48 | 0.41 | 0.38 | 0.31 | 0.26 |
| Australia | G5822     | 1              | 0.99 | 0.97 | 0.93 | 0.91 | 0.83 | 0.74 | 0.72 | 0.70 | 0.62 | 0.54 | 0.48 | 0.41 | 0.37 | 0.33 | 0.29 | 0.25 | 0.22 |
| Australia | G5828     | 1              | 0.98 | 0.91 | 0.85 | 0.85 | 0.83 | 0.77 | 0.71 | 0.68 | 0.61 | 0.51 | 0.43 | 0.32 | 0.28 | 0.20 | 0.17 | 0.09 | 0.09 |
| Australia | G5829     | 1              | 0.99 | 0.92 | 0.83 | 0.75 | 0.71 | 0.66 | 0.64 | 0.59 | 0.56 | 0.52 | 0.49 | 0.43 | 0.38 | 0.33 | 0.33 | 0.30 | 0.27 |
| Australia | G5836     | 1              | 1.00 | 0.98 | 0.94 | 0.92 | 0.88 | 0.78 | 0.75 | 0.73 | 0.68 | 0.58 | 0.52 | 0.42 | 0.39 | 0.31 | 0.28 | 0.22 | 0.22 |
| Australia | G5837     | 1              | 1.00 | 0.98 | 0.96 | 0.94 | 0.91 | 0.87 | 0.85 | 0.83 | 0.80 | 0.76 | 0.70 | 0.63 | 0.57 | 0.51 | 0.46 | 0.37 | 0.32 |

| Country   | GloFAS ID | Station filter | LT1  | LT2  | LT3  | LT4  | LT5  | LT6  | LT7  | LT8  | LT9  | LT10 | LT12 | LT14 | LT16 | LT18 | LT20 | LT25 | L30  |
|-----------|-----------|----------------|------|------|------|------|------|------|------|------|------|------|------|------|------|------|------|------|------|
| Australia | G5844     | 1              | 0.99 | 0.96 | 0.88 | 0.84 | 0.86 | 0.80 | 0.72 | 0.71 | 0.69 | 0.61 | 0.55 | 0.46 | 0.44 | 0.35 | 0.34 | 0.23 | 0.21 |
| Australia | G5849     | 1              | 0.97 | 0.95 | 0.93 | 0.90 | 0.86 | 0.83 | 0.82 | 0.76 | 0.71 | 0.69 | 0.60 | 0.54 | 0.46 | 0.44 | 0.40 | 0.34 | 0.29 |
| Australia | G5866     | 1              | 0.99 | 0.96 | 0.91 | 0.81 | 0.79 | 0.74 | 0.70 | 0.59 | 0.52 | 0.53 | 0.49 | 0.47 | 0.42 | 0.46 | 0.44 | 0.44 | 0.40 |
| Australia | G5867     | 1              | 0.99 | 0.98 | 0.94 | 0.89 | 0.84 | 0.79 | 0.75 | 0.70 | 0.67 | 0.64 | 0.60 | 0.57 | 0.55 | 0.53 | 0.52 | 0.50 | 0.48 |
| Australia | G5875     | 1              | 1.00 | 0.98 | 0.94 | 0.88 | 0.82 | 0.76 | 0.71 | 0.69 | 0.64 | 0.63 | 0.59 | 0.56 | 0.51 | 0.48 | 0.43 | 0.39 | 0.34 |
| Australia | G5876     | 1              | 1.00 | 1.00 | 0.96 | 0.93 | 0.90 | 0.90 | 0.86 | 0.79 | 0.77 | 0.76 | 0.64 | 0.59 | 0.51 | 0.46 | 0.38 | 0.31 | 0.23 |
| Australia | G5877     | 1              | 0.99 | 0.94 | 0.90 | 0.86 | 0.79 | 0.76 | 0.74 | 0.71 | 0.63 | 0.59 | 0.52 | 0.49 | 0.43 | 0.40 | 0.37 | 0.34 | 0.31 |
| Australia | G5881     | 1              | 1.00 | 0.98 | 0.94 | 0.91 | 0.90 | 0.86 | 0.82 | 0.80 | 0.79 | 0.76 | 0.68 | 0.60 | 0.55 | 0.50 | 0.45 | 0.40 | 0.36 |
| Australia | G5884     | 1              | 1.00 | 1.00 | 0.98 | 0.94 | 0.91 | 0.89 | 0.88 | 0.83 | 0.78 | 0.76 | 0.68 | 0.61 | 0.53 | 0.48 | 0.39 | 0.32 | 0.22 |
| Australia | G5885     | 1              | 1.00 | 0.98 | 0.91 | 0.83 | 0.82 | 0.76 | 0.62 | 0.64 | 0.64 | 0.59 | 0.54 | 0.44 | 0.47 | 0.40 | 0.43 | 0.34 | 0.35 |
| Australia | G5889     | 1              | 0.99 | 0.96 | 0.93 | 0.89 | 0.84 | 0.81 | 0.81 | 0.80 | 0.76 | 0.75 | 0.69 | 0.67 | 0.63 | 0.61 | 0.58 | 0.55 | 0.51 |
| Australia | G5890     | 1              | 0.97 | 0.94 | 0.89 | 0.84 | 0.74 | 0.67 | 0.64 | 0.62 | 0.55 | 0.52 | 0.45 | 0.43 | 0.39 | 0.42 | 0.37 | 0.38 | 0.32 |
| Australia | G5891     | 1              | 1.00 | 0.98 | 0.96 | 0.95 | 0.92 | 0.88 | 0.86 | 0.86 | 0.85 | 0.83 | 0.79 | 0.76 | 0.74 | 0.70 | 0.68 | 0.67 | 0.66 |
| Australia | G5893     | 1              | 1.00 | 0.99 | 0.96 | 0.94 | 0.92 | 0.89 | 0.86 | 0.84 | 0.81 | 0.77 | 0.70 | 0.62 | 0.57 | 0.50 | 0.45 | 0.37 | 0.32 |
| Australia | G5895     | 1              | 0.99 | 0.91 | 0.88 | 0.80 | 0.73 | 0.70 | 0.69 | 0.66 | 0.61 | 0.56 | 0.51 | 0.48 | 0.44 | 0.44 | 0.42 | 0.38 | 0.37 |
| Australia | G5896     | 1              | 0.99 | 0.96 | 0.93 | 0.89 | 0.83 | 0.76 | 0.74 | 0.71 | 0.68 | 0.63 | 0.55 | 0.49 | 0.46 | 0.42 | 0.39 | 0.35 | 0.33 |
| Australia | G5901     | 1              | 1.00 | 1.00 | 0.99 | 0.97 | 0.95 | 0.93 | 0.89 | 0.84 | 0.80 | 0.77 | 0.69 | 0.63 | 0.57 | 0.53 | 0.49 | 0.44 | 0.38 |
| Australia | G5904     | 1              | 1.00 | 1.00 | 0.99 | 0.96 | 0.93 | 0.88 | 0.82 | 0.78 | 0.74 | 0.71 | 0.65 | 0.58 | 0.52 | 0.47 | 0.44 | 0.39 | 0.33 |
| Australia | G5909     | 1              | 0.97 | 0.90 | 0.79 | 0.70 | 0.70 | 0.70 | 0.67 | 0.59 | 0.61 | 0.62 | 0.60 | 0.63 | 0.59 | 0.56 | 0.63 | 0.56 | 0.59 |
| Australia | G5910     | 1              | 1.00 | 1.00 | 0.99 | 0.98 | 0.96 | 0.92 | 0.88 | 0.85 | 0.81 | 0.78 | 0.71 | 0.64 | 0.59 | 0.53 | 0.49 | 0.41 | 0.34 |
| Australia | G5912     | 1              | 1.00 | 0.99 | 0.99 | 0.98 | 0.97 | 0.96 | 0.95 | 0.93 | 0.91 | 0.89 | 0.84 | 0.77 | 0.71 | 0.64 | 0.57 | 0.43 | 0.35 |
| Australia | G5913     | 1              | 1.00 | 1.00 | 1.00 | 0.99 | 0.95 | 0.93 | 0.91 | 0.89 | 0.87 | 0.82 | 0.80 | 0.69 | 0.64 | 0.57 | 0.52 | 0.37 | 0.29 |
| Australia | G5915     | 1              | 0.99 | 0.97 | 0.94 | 0.93 | 0.88 | 0.86 | 0.84 | 0.79 | 0.74 | 0.68 | 0.60 | 0.52 | 0.49 | 0.44 | 0.38 | 0.34 | 0.30 |
| Australia | G5916     | 1              | 1.00 | 1.00 | 1.00 | 0.99 | 0.99 | 0.98 | 0.96 | 0.94 | 0.93 | 0.91 | 0.88 | 0.82 | 0.79 | 0.78 | 0.73 | 0.61 | 0.49 |
| Australia | G5920     | 1              | 1.00 | 0.99 | 0.99 | 0.98 | 0.97 | 0.95 | 0.94 | 0.93 | 0.91 | 0.88 | 0.82 | 0.77 | 0.72 | 0.65 | 0.59 | 0.49 | 0.40 |
| Australia | G5929     | 1              | 1.00 | 1.00 | 1.00 | 0.99 | 0.94 | 0.89 | 0.87 | 0.88 | 0.83 | 0.77 | 0.72 | 0.64 | 0.58 | 0.54 | 0.49 | 0.43 | 0.36 |
| Australia | G5932     | 1              | 1.00 | 1.00 | 0.98 | 0.94 | 0.95 | 0.94 | 0.90 | 0.81 | 0.76 | 0.76 | 0.64 | 0.66 | 0.56 | 0.54 | 0.49 | 0.45 | 0.37 |
| Australia | G5934     | 1              | 1.00 | 1.00 | 1.00 | 1.00 | 1.00 | 0.99 | 0.99 | 0.98 | 0.97 | 0.95 | 0.92 | 0.88 | 0.83 | 0.79 | 0.77 | 0.66 | 0.55 |
| Australia | G5941     | 1              | 0.96 | 0.94 | 0.89 | 0.77 | 0.72 | 0.66 | 0.60 | 0.55 | 0.53 | 0.50 | 0.42 | 0.40 | 0.36 | 0.34 | 0.30 | 0.27 | 0.24 |
| Australia | G5948     | 1              | 1.00 | 0.99 | 0.97 | 0.96 | 0.92 | 0.86 | 0.83 | 0.80 | 0.77 | 0.73 | 0.66 | 0.60 | 0.56 | 0.52 | 0.50 | 0.42 | 0.38 |
| Australia | G5949     | 1              | 1.00 | 0.99 | 0.97 | 0.94 | 0.89 | 0.85 | 0.83 | 0.81 | 0.79 | 0.77 | 0.70 | 0.66 | 0.61 | 0.57 | 0.52 | 0.47 | 0.41 |
| Australia | G5950     | 1              | 1.00 | 0.98 | 0.95 | 0.96 | 0.92 | 0.87 | 0.84 | 0.84 | 0.80 | 0.74 | 0.69 | 0.59 | 0.55 | 0.49 | 0.44 | 0.36 | 0.31 |
| Australia | G5951     | 1              | 1.00 | 1.00 | 1.00 | 0.99 | 0.96 | 0.94 | 0.90 | 0.85 | 0.80 | 0.76 | 0.68 | 0.63 | 0.57 | 0.52 | 0.47 | 0.39 | 0.33 |
| Australia | G5952     | 1              | 1.00 | 1.00 | 1.00 | 0.99 | 0.99 | 0.98 | 0.96 | 0.95 | 0.93 | 0.91 | 0.87 | 0.83 | 0.78 | 0.73 | 0.68 | 0.58 | 0.47 |
| Australia | G5953     | 1              | 1.00 | 1.00 | 1.00 | 1.00 | 1.00 | 1.00 | 1.00 | 1.00 | 0.99 | 0.98 | 0.97 | 0.94 | 0.91 | 0.86 | 0.82 | 0.76 | 0.66 |
| Australia | G5957     | 1              | 1.00 | 1.00 | 1.00 | 1.00 | 1.00 | 0.98 | 0.94 | 0.94 | 0.91 | 0.88 | 0.83 | 0.82 | 0.72 | 0.66 | 0.62 | 0.46 | 0.35 |
| Australia | G5958     | 1              | 1.00 | 1.00 | 1.00 | 1.00 | 1.00 | 0.99 | 0.95 | 0.91 | 0.88 | 0.87 | 0.80 | 0.73 | 0.67 | 0.62 | 0.56 | 0.49 | 0.40 |
| Australia | G5961     | 1              | 1.00 | 1.00 | 0.99 | 0.98 | 0.96 | 0.94 | 0.93 | 0.93 | 0.92 | 0.90 | 0.86 | 0.81 | 0.78 | 0.74 | 0.70 | 0.67 | 0.64 |
| Australia | G5962     | 1              | 1.00 | 1.00 | 0.99 | 0.98 | 0.96 | 0.92 | 0.87 | 0.87 | 0.84 | 0.77 | 0.78 | 0.72 | 0.71 | 0.66 | 0.66 | 0.61 | 0.60 |



| Country   | GloFAS ID | Station filter | LT1  | LT2  | LT3  | LT4  | LT5  | LT6  | LT7  | LT8  | LT9  | LT10 | LT12 | LT14 | LT16 | LT18 | LT20 | LT25 | L30  |
|-----------|-----------|----------------|------|------|------|------|------|------|------|------|------|------|------|------|------|------|------|------|------|
| Australia | G5969     | 1              | 1.00 | 1.00 | 1.00 | 1.00 | 1.00 | 1.00 | 1.00 | 1.00 | 0.99 | 0.99 | 0.99 | 0.97 | 0.95 | 0.93 | 0.89 | 0.80 | 0.74 |
| Australia | G5972     | 1              | 1.00 | 1.00 | 1.00 | 1.00 | 1.00 | 0.99 | 0.99 | 0.99 | 0.99 | 0.98 | 0.96 | 0.94 | 0.90 | 0.85 | 0.78 | 0.62 | 0.52 |
| Australia | G5975     | 1              | 1.00 | 1.00 | 1.00 | 1.00 | 0.99 | 0.98 | 0.97 | 0.96 | 0.95 | 0.93 | 0.88 | 0.84 | 0.80 | 0.76 | 0.71 | 0.59 | 0.50 |
| Australia | G5976     | 1              | 1.00 | 1.00 | 0.98 | 0.97 | 0.95 | 0.93 | 0.90 | 0.89 | 0.88 | 0.86 | 0.83 | 0.79 | 0.77 | 0.73 | 0.68 | 0.58 | 0.50 |
| Australia | G5978     | 1              | 1.00 | 0.99 | 0.99 | 0.98 | 0.94 | 0.89 | 0.89 | 0.90 | 0.89 | 0.86 | 0.74 | 0.66 | 0.62 | 0.56 | 0.49 | 0.41 | 0.39 |
| Australia | G5979     | 1              | 1.00 | 1.00 | 1.00 | 1.00 | 0.99 | 0.99 | 0.99 | 0.98 | 0.96 | 0.94 | 0.92 | 0.87 | 0.84 | 0.79 | 0.77 | 0.67 | 0.61 |
| Australia | G5981     | 1              | 1.00 | 1.00 | 0.99 | 0.99 | 0.99 | 0.98 | 0.97 | 0.96 | 0.93 | 0.91 | 0.89 | 0.83 | 0.81 | 0.76 | 0.74 | 0.64 | 0.59 |
| Australia | G5982     | 1              | 1.00 | 1.00 | 1.00 | 1.00 | 1.00 | 1.00 | 1.00 | 0.99 | 0.96 | 0.94 | 0.91 | 0.85 | 0.82 | 0.80 | 0.70 | 0.57 | 0.45 |
| Australia | G5983     | 1              | 1.00 | 1.00 | 1.00 | 1.00 | 1.00 | 1.00 | 1.00 | 1.00 | 1.00 | 1.00 | 1.00 | 1.00 | 1.00 | 0.99 | 0.99 | 0.98 | 0.96 |
| Australia | G5987     | 1              | 1.00 | 1.00 | 1.00 | 1.00 | 1.00 | 1.00 | 1.00 | 1.00 | 1.00 | 1.00 | 1.00 | 1.00 | 0.99 | 0.99 | 0.99 | 0.98 | 0.96 |
| Australia | G5989     | 1              | 1.00 | 0.97 | 0.93 | 0.93 | 0.95 | 0.95 | 0.93 | 0.91 | 0.89 | 0.89 | 0.87 | 0.88 | 0.85 | 0.83 | 0.85 | 0.85 | 0.85 |
| Australia | G5990     | 1              | 1.00 | 1.00 | 0.99 | 0.96 | 0.92 | 0.83 | 0.79 | 0.75 | 0.69 | 0.67 | 0.62 | 0.55 | 0.48 | 0.47 | 0.42 | 0.37 | 0.33 |
| Australia | G5991     | 1              | 1.00 | 1.00 | 1.00 | 1.00 | 0.99 | 0.98 | 0.95 | 0.91 | 0.88 | 0.84 | 0.76 | 0.69 | 0.61 | 0.53 | 0.46 | 0.34 | 0.27 |
| Australia | G5994     | 1              | 1.00 | 1.00 | 1.00 | 0.99 | 0.98 | 0.97 | 0.97 | 0.94 | 0.90 | 0.88 | 0.82 | 0.73 | 0.66 | 0.62 | 0.57 | 0.49 | 0.39 |
| Australia | G5997     | 1              | 1.00 | 1.00 | 0.99 | 0.98 | 0.95 | 0.90 | 0.87 | 0.85 | 0.79 | 0.73 | 0.63 | 0.52 | 0.46 | 0.41 | 0.35 | 0.26 | 0.24 |
| Australia | G5998     | 1              | 0.99 | 0.94 | 0.92 | 0.93 | 0.93 | 0.94 | 0.93 | 0.92 | 0.91 | 0.90 | 0.90 | 0.90 | 0.89 | 0.89 | 0.89 | 0.88 | 0.89 |
| Australia | G5999     | 1              | 1.00 | 1.00 | 0.99 | 0.99 | 0.98 | 0.92 | 0.84 | 0.80 | 0.77 | 0.74 | 0.72 | 0.65 | 0.60 | 0.54 | 0.53 | 0.45 | 0.44 |
| Australia | G6000     | 1              | 1.00 | 1.00 | 1.00 | 1.00 | 0.98 | 0.95 | 0.94 | 0.95 | 0.93 | 0.89 | 0.87 | 0.80 | 0.74 | 0.68 | 0.67 | 0.57 | 0.52 |
| Australia | G6001     | 1              | 1.00 | 1.00 | 0.99 | 0.99 | 0.97 | 0.95 | 0.94 | 0.94 | 0.93 | 0.92 | 0.89 | 0.83 | 0.76 | 0.70 | 0.67 | 0.56 | 0.48 |
| Australia | G6002     | 1              | 1.00 | 1.00 | 0.99 | 0.99 | 0.98 | 0.96 | 0.94 | 0.91 | 0.88 | 0.84 | 0.74 | 0.61 | 0.52 | 0.44 | 0.37 | 0.21 | 0.14 |
| Australia | G6003     | 1              | 1.00 | 1.00 | 1.00 | 1.00 | 0.99 | 0.97 | 0.95 | 0.95 | 0.95 | 0.94 | 0.89 | 0.86 | 0.79 | 0.72 | 0.69 | 0.60 | 0.53 |
| Australia | G6004     | 1              | 1.00 | 1.00 | 1.00 | 1.00 | 1.00 | 1.00 | 1.00 | 0.99 | 0.99 | 0.98 | 0.94 | 0.93 | 0.91 | 0.86 | 0.83 | 0.74 | 0.64 |
| Australia | G6013     | 1              | 1.00 | 1.00 | 0.99 | 0.98 | 0.98 | 0.97 | 0.95 | 0.94 | 0.92 | 0.89 | 0.80 | 0.73 | 0.67 | 0.59 | 0.52 | 0.39 | 0.29 |
| Australia | G6015     | 1              | 1.00 | 1.00 | 1.00 | 0.99 | 0.98 | 0.96 | 0.94 | 0.90 | 0.87 | 0.84 | 0.76 | 0.68 | 0.62 | 0.55 | 0.48 | 0.36 | 0.29 |
| Australia | G6021     | 1              | 1.00 | 1.00 | 1.00 | 0.99 | 0.98 | 0.97 | 0.96 | 0.95 | 0.92 | 0.90 | 0.85 | 0.82 | 0.78 | 0.74 | 0.69 | 0.59 | 0.51 |
| Australia | G6022     | 1              | 1.00 | 1.00 | 1.00 | 1.00 | 1.00 | 1.00 | 1.00 | 1.00 | 0.99 | 0.97 | 0.93 | 0.89 | 0.88 | 0.83 | 0.79 | 0.70 | 0.63 |
| Australia | G6023     | 1              | 1.00 | 1.00 | 1.00 | 0.99 | 0.93 | 0.90 | 0.91 | 0.85 | 0.84 | 0.86 | 0.78 | 0.75 | 0.66 | 0.67 | 0.61 | 0.57 | 0.44 |
| Australia | G6024     | 1              | 1.00 | 0.99 | 0.99 | 0.98 | 0.96 | 0.95 | 0.93 | 0.92 | 0.90 | 0.88 | 0.81 | 0.75 | 0.71 | 0.67 | 0.62 | 0.51 | 0.43 |
| Australia | G6027     | 1              | 0.95 | 0.87 | 0.91 | 0.90 | 0.82 | 0.81 | 0.85 | 0.82 | 0.74 | 0.73 | 0.66 | 0.68 | 0.59 | 0.61 | 0.55 | 0.55 | 0.50 |
| Australia | G6029     | 1              | 0.99 | 0.97 | 0.88 | 0.77 | 0.76 | 0.78 | 0.73 | 0.65 | 0.65 | 0.60 | 0.54 | 0.53 | 0.49 | 0.43 | 0.47 | 0.38 | 0.38 |
| Australia | G6030     | 1              | 1.00 | 0.95 | 0.90 | 0.93 | 0.88 | 0.83 | 0.84 | 0.81 | 0.73 | 0.68 | 0.63 | 0.60 | 0.52 | 0.52 | 0.44 | 0.44 | 0.37 |
| Australia | G6032     | 1              | 0.92 | 0.86 | 0.92 | 0.88 | 0.80 | 0.82 | 0.86 | 0.81 | 0.73 | 0.76 | 0.67 | 0.73 | 0.64 | 0.66 | 0.63 | 0.63 | 0.59 |
| Australia | G6033     | 1              | 1.00 | 0.99 | 0.95 | 0.90 | 0.86 | 0.83 | 0.77 | 0.69 | 0.63 | 0.58 | 0.50 | 0.43 | 0.39 | 0.38 | 0.37 | 0.38 | 0.35 |
| Australia | G6034     | 1              | 0.93 | 0.87 | 0.91 | 0.87 | 0.80 | 0.83 | 0.86 | 0.82 | 0.77 | 0.80 | 0.72 | 0.78 | 0.69 | 0.71 | 0.70 | 0.68 | 0.65 |
| Australia | G6035     | 1              | 1.00 | 1.00 | 0.98 | 0.94 | 0.89 | 0.87 | 0.87 | 0.85 | 0.80 | 0.79 | 0.73 | 0.73 | 0.70 | 0.70 | 0.67 | 0.67 | 0.62 |
| Australia | G6039     | 0              | 0.98 | 0.96 | 0.94 | 0.92 | 0.91 | 0.89 | 0.87 | 0.86 | 0.85 | 0.84 | 0.82 | 0.81 | 0.81 | 0.81 | 0.80 | 0.77 | 0.74 |
| Australia | G6040     | 1              | 1.00 | 1.00 | 0.99 | 0.99 | 0.97 | 0.94 | 0.88 | 0.83 | 0.81 | 0.78 | 0.67 | 0.56 | 0.48 | 0.40 | 0.36 | 0.29 | 0.25 |
| Australia | G6041     | 1              | 1.00 | 0.99 | 0.98 | 0.96 | 0.93 | 0.88 | 0.84 | 0.80 | 0.76 | 0.72 | 0.62 | 0.52 | 0.43 | 0.37 | 0.33 | 0.24 | 0.18 |
| Australia | G6048     | 1              | 0.91 | 0.85 | 0.77 | 0.73 | 0.70 | 0.65 | 0.57 | 0.55 | 0.53 | 0.48 | 0.47 | 0.42 | 0.42 | 0.41 | 0.40 | 0.38 | 0.38 |

| Country     | GloFAS ID | Station filter | LT1  | LT2  | LT3  | LT4  | LT5  | LT6  | LT7  | LT8  | LT9  | LT10 | LT12 | LT14 | LT16 | LT18 | LT20 | LT25 | L30  |
|-------------|-----------|----------------|------|------|------|------|------|------|------|------|------|------|------|------|------|------|------|------|------|
| Australia   | G6049     | 1              | 1.00 | 1.00 | 0.99 | 0.98 | 0.96 | 0.92 | 0.89 | 0.86 | 0.83 | 0.80 | 0.77 | 0.74 | 0.70 | 0.67 | 0.63 | 0.51 | 0.41 |
| Australia   | G6056     | 1              | 1.00 | 1.00 | 1.00 | 1.00 | 0.99 | 0.94 | 0.90 | 0.91 | 0.89 | 0.83 | 0.80 | 0.73 | 0.64 | 0.56 | 0.55 | 0.45 | 0.40 |
| Australia   | G6061     | 1              | 1.00 | 1.00 | 1.00 | 1.00 | 1.00 | 1.00 | 1.00 | 1.00 | 0.99 | 0.99 | 0.98 | 0.97 | 0.96 | 0.94 | 0.93 | 0.88 | 0.83 |
| Australia   | G6064     | 1              | 1.00 | 1.00 | 1.00 | 1.00 | 0.99 | 0.99 | 0.99 | 0.98 | 0.94 | 0.89 | 0.77 | 0.71 | 0.67 | 0.61 | 0.56 | 0.49 | 0.45 |
| Australia   | G6067     | 1              | 0.99 | 0.96 | 0.92 | 0.86 | 0.81 | 0.76 | 0.72 | 0.67 | 0.64 | 0.60 | 0.52 | 0.46 | 0.41 | 0.40 | 0.36 | 0.35 | 0.32 |
| Australia   | G6070     | 1              | 1.00 | 1.00 | 1.00 | 0.99 | 0.99 | 0.98 | 0.97 | 0.95 | 0.94 | 0.92 | 0.88 | 0.84 | 0.80 | 0.75 | 0.69 | 0.59 | 0.50 |
| New Zealand | G1509     | 1              | 0.97 | 0.91 | 0.86 | 0.82 | 0.78 | 0.74 | 0.71 | 0.68 | 0.64 | 0.61 | 0.57 | 0.53 | 0.50 | 0.49 | 0.47 | 0.45 | 0.43 |
| New Zealand | G1512     | 1              | 0.97 | 0.88 | 0.81 | 0.76 | 0.70 | 0.64 | 0.60 | 0.57 | 0.53 | 0.48 | 0.42 | 0.39 | 0.35 | 0.31 | 0.28 | 0.24 | 0.21 |
| New Zealand | G1513     | 1              | 1.00 | 0.97 | 0.90 | 0.80 | 0.72 | 0.66 | 0.61 | 0.56 | 0.53 | 0.49 | 0.42 | 0.37 | 0.34 | 0.31 | 0.30 | 0.25 | 0.23 |

Table 4: GloFAS climatology skill scores for Europe.

| Country           | GloFAS ID | Station filter | LT1  | LT2  | LT3  | LT4  | LT5  | LT6  | LT7  | LT8  | LT9  | LT10 | LT12  | LT14  | LT16  | LT18  | LT20  | LT25  | L30   |
|-------------------|-----------|----------------|------|------|------|------|------|------|------|------|------|------|-------|-------|-------|-------|-------|-------|-------|
| Austria           | G0456     | 1              | 0.99 | 0.97 | 0.93 | 0.88 | 0.84 | 0.80 | 0.76 | 0.72 | 0.70 | 0.67 | 0.62  | 0.58  | 0.55  | 0.52  | 0.50  | 0.47  | 0.45  |
| Austria           | G0461     | 1              | 0.97 | 0.94 | 0.91 | 0.87 | 0.81 | 0.75 | 0.68 | 0.61 | 0.55 | 0.50 | 0.42  | 0.38  | 0.35  | 0.33  | 0.31  | 0.28  | 0.25  |
| Austria           | G0464     | 1              | 0.98 | 0.95 | 0.91 | 0.87 | 0.82 | 0.76 | 0.69 | 0.62 | 0.56 | 0.51 | 0.43  | 0.38  | 0.36  | 0.33  | 0.31  | 0.29  | 0.26  |
| Austria           | G0465     | 1              | 1.00 | 0.98 | 0.95 | 0.89 | 0.82 | 0.74 | 0.65 | 0.56 | 0.49 | 0.43 | 0.35  | 0.31  | 0.28  | 0.26  | 0.24  | 0.21  | 0.21  |
| Austria           | G0467     | 1              | 0.98 | 0.94 | 0.91 | 0.87 | 0.82 | 0.75 | 0.68 | 0.62 | 0.56 | 0.50 | 0.43  | 0.38  | 0.36  | 0.33  | 0.31  | 0.29  | 0.26  |
| Belarus           | G3224     | 1              | 1.00 | 0.98 | 0.93 | 0.83 | 0.73 | 0.64 | 0.56 | 0.51 | 0.47 | 0.45 | 0.42  | 0.40  | 0.39  | 0.39  | 0.36  | 0.34  | 0.33  |
| Belarus           | G3225     | 1              | 1.00 | 0.99 | 0.97 | 0.93 | 0.88 | 0.81 | 0.74 | 0.68 | 0.62 | 0.58 | 0.53  | 0.49  | 0.48  | 0.46  | 0.45  | 0.43  | 0.41  |
| Belarus           | G3378     | 1              | 1.00 | 0.99 | 0.98 | 0.97 | 0.96 | 0.95 | 0.94 | 0.93 | 0.91 | 0.90 | 0.87  | 0.85  | 0.82  | 0.79  | 0.76  | 0.71  | 0.67  |
| Belarus           | G3384     | 1              | 1.00 | 0.99 | 0.98 | 0.97 | 0.96 | 0.96 | 0.95 | 0.94 | 0.93 | 0.92 | 0.89  | 0.86  | 0.83  | 0.80  | 0.78  | 0.73  | 0.69  |
| Belarus           | G3385     | 1              | 1.00 | 0.99 | 0.98 | 0.98 | 0.96 | 0.95 | 0.92 | 0.90 | 0.88 | 0.86 | 0.81  | 0.77  | 0.74  | 0.71  | 0.68  | 0.64  | 0.60  |
| Belarus           | G3390     | 1              | 1.00 | 0.99 | 0.98 | 0.97 | 0.96 | 0.95 | 0.94 | 0.92 | 0.91 | 0.89 | 0.85  | 0.81  | 0.77  | 0.74  | 0.72  | 0.68  | 0.66  |
| Belarus           | G3399     | 1              | 1.00 | 1.00 | 0.99 | 0.99 | 0.98 | 0.97 | 0.96 | 0.95 | 0.93 | 0.92 | 0.89  | 0.86  | 0.84  | 0.82  | 0.80  | 0.77  | 0.75  |
| Belarus           | G3404     | 1              | 1.00 | 1.00 | 1.00 | 0.99 | 0.99 | 0.98 | 0.98 | 0.97 | 0.96 | 0.95 | 0.93  | 0.90  | 0.88  | 0.86  | 0.84  | 0.80  | 0.76  |
| Belarus           | G3405     | 1              | 1.00 | 1.00 | 1.00 | 0.99 | 0.99 | 0.99 | 0.98 | 0.98 | 0.97 | 0.96 | 0.95  | 0.93  | 0.90  | 0.88  | 0.85  | 0.78  | 0.71  |
| Belarus           | G3406     | 1              | 1.00 | 1.00 | 1.00 | 1.00 | 0.99 | 0.99 | 0.99 | 0.99 | 0.98 | 0.98 | 0.97  | 0.95  | 0.93  | 0.91  | 0.89  | 0.84  | 0.79  |
| Belarus           | G3411     | 1              | 1.00 | 1.00 | 1.00 | 0.99 | 0.99 | 0.99 | 0.98 | 0.97 | 0.96 | 0.95 | 0.93  | 0.91  | 0.88  | 0.86  | 0.84  | 0.79  | 0.75  |
| Belarus           | G3412     | 1              | 1.00 | 1.00 | 1.00 | 1.00 | 1.00 | 0.99 | 0.99 | 0.98 | 0.97 | 0.96 | 0.93  | 0.91  | 0.88  | 0.85  | 0.82  | 0.76  | 0.72  |
| Belarus           | G3413     | 1              | 1.00 | 1.00 | 0.99 | 0.99 | 0.98 | 0.97 | 0.97 | 0.96 | 0.95 | 0.93 | 0.91  | 0.88  | 0.86  | 0.83  | 0.80  | 0.74  | 0.70  |
| Belarus           | G3416     | 1              | 1.00 | 1.00 | 1.00 | 0.99 | 0.99 | 0.99 | 0.98 | 0.98 | 0.97 | 0.96 | 0.94  | 0.91  | 0.87  | 0.82  | 0.78  | 0.69  | 0.63  |
| Bosnia and Herzeg | G1767     | 1              | 0.99 | 0.92 | 0.79 | 0.67 | 0.56 | 0.45 | 0.34 | 0.26 | 0.17 | 0.08 | -0.03 | -0.13 | -0.18 | -0.26 | -0.31 | -0.34 | -0.32 |
| Bosnia and Herzeg | G3823     | 1              | 1.00 | 0.96 | 0.86 | 0.74 | 0.63 | 0.52 | 0.40 | 0.31 | 0.22 | 0.13 | -0.01 | -0.11 | -0.17 | -0.25 | -0.30 | -0.35 | -0.32 |
| Bulgaria          | G0626     | 1              | 1.00 | 0.99 | 0.99 | 0.99 | 0.98 | 0.98 | 0.98 | 0.97 | 0.97 | 0.96 | 0.93  | 0.89  | 0.83  | 0.75  | 0.65  | 0.41  | 0.24  |
| Bulgaria          | G0627     | 1              | 0.99 | 0.97 | 0.95 | 0.93 | 0.92 | 0.91 | 0.89 | 0.88 | 0.87 | 0.85 | 0.82  | 0.79  | 0.74  | 0.67  | 0.59  | 0.37  | 0.21  |
| Bulgaria          | G0632     | 1              | 0.99 | 0.97 | 0.95 | 0.94 | 0.93 | 0.92 | 0.90 | 0.89 | 0.88 | 0.86 | 0.84  | 0.80  | 0.75  | 0.68  | 0.59  | 0.37  | 0.21  |

| Country        | GloFAS ID | Station filter | LT1  | LT2  | LT3  | LT4  | LT5  | LT6  | LT7  | LT8   | LT9   | LT10  | LT12  | LT14  | LT16  | LT18  | LT20  | LT25  | L30   |
|----------------|-----------|----------------|------|------|------|------|------|------|------|-------|-------|-------|-------|-------|-------|-------|-------|-------|-------|
| Bulgaria       | G0633     | 1              | 0.99 | 0.99 | 0.98 | 0.98 | 0.97 | 0.97 | 0.96 | 0.95  | 0.95  | 0.94  | 0.91  | 0.87  | 0.81  | 0.73  | 0.64  | 0.40  | 0.23  |
| Bulgaria       | G0638     | 1              | 0.99 | 0.97 | 0.96 | 0.94 | 0.93 | 0.92 | 0.91 | 0.90  | 0.89  | 0.88  | 0.85  | 0.81  | 0.76  | 0.69  | 0.60  | 0.37  | 0.21  |
| Bulgaria       | G0679     | 1              | 1.00 | 0.97 | 0.90 | 0.80 | 0.70 | 0.58 | 0.47 | 0.37  | 0.28  | 0.20  | 0.07  | -0.03 | -0.10 | -0.16 | -0.21 | -0.28 | -0.29 |
| Bulgaria       | G0686     | 1              | 0.94 | 0.81 | 0.69 | 0.59 | 0.50 | 0.42 | 0.35 | 0.28  | 0.21  | 0.15  | 0.06  | 0.00  | -0.05 | -0.08 | -0.14 | -0.15 | -0.14 |
| Bulgaria       | G3863     | 1              | 0.99 | 0.98 | 0.97 | 0.96 | 0.96 | 0.95 | 0.94 | 0.93  | 0.92  | 0.91  | 0.89  | 0.85  | 0.79  | 0.71  | 0.62  | 0.38  | 0.21  |
| Croatia        | G1766     | 1              | 1.00 | 0.99 | 0.98 | 0.94 | 0.90 | 0.85 | 0.80 | 0.73  | 0.67  | 0.60  | 0.44  | 0.30  | 0.18  | 0.08  | 0.01  | -0.10 | -0.13 |
| Croatia        | G3748     | 1              | 0.96 | 0.82 | 0.68 | 0.60 | 0.53 | 0.47 | 0.41 | 0.37  | 0.33  | 0.29  | 0.25  | 0.21  | 0.19  | 0.20  | 0.19  | 0.17  | 0.16  |
| Croatia        | G3751     | 1              | 1.00 | 0.99 | 0.98 | 0.97 | 0.95 | 0.91 | 0.88 | 0.83  | 0.77  | 0.71  | 0.59  | 0.47  | 0.38  | 0.31  | 0.25  | 0.21  | 0.19  |
| Croatia        | G3788     | 1              | 0.99 | 0.95 | 0.89 | 0.84 | 0.80 | 0.76 | 0.71 | 0.66  | 0.62  | 0.57  | 0.49  | 0.41  | 0.35  | 0.32  | 0.30  | 0.25  | 0.24  |
| Czech Republic | G0368     | 1              | 0.97 | 0.89 | 0.77 | 0.66 | 0.57 | 0.51 | 0.46 | 0.41  | 0.38  | 0.36  | 0.32  | 0.30  | 0.27  | 0.27  | 0.26  | 0.25  | 0.23  |
| Czech Republic | G0374     | 1              | 0.96 | 0.87 | 0.74 | 0.64 | 0.55 | 0.49 | 0.45 | 0.40  | 0.38  | 0.35  | 0.31  | 0.29  | 0.27  | 0.26  | 0.25  | 0.24  | 0.22  |
| Czech Republic | G0442     | 1              | 0.98 | 0.92 | 0.79 | 0.65 | 0.52 | 0.41 | 0.32 | 0.25  | 0.19  | 0.15  | 0.08  | 0.04  | 0.01  | 0.00  | -0.01 | -0.03 | -0.04 |
| Czech Republic | G3512     | 1              | 0.95 | 0.88 | 0.77 | 0.69 | 0.62 | 0.58 | 0.54 | 0.50  | 0.48  | 0.46  | 0.43  | 0.41  | 0.39  | 0.37  | 0.35  | 0.34  | 0.31  |
| Czech Republic | G3524     | 1              | 0.94 | 0.74 | 0.51 | 0.33 | 0.19 | 0.09 | 0.01 | -0.04 | -0.08 | -0.11 | -0.15 | -0.17 | -0.17 | -0.16 | -0.14 | -0.12 | -0.11 |
| Czech Republic | G3545     | 1              | 0.98 | 0.89 | 0.76 | 0.67 | 0.59 | 0.54 | 0.50 | 0.45  | 0.43  | 0.41  | 0.38  | 0.37  | 0.35  | 0.32  | 0.29  | 0.27  | 0.26  |
| Czech Republic | G3547     | 1              | 0.94 | 0.85 | 0.75 | 0.67 | 0.60 | 0.56 | 0.53 | 0.48  | 0.47  | 0.45  | 0.42  | 0.41  | 0.39  | 0.37  | 0.35  | 0.34  | 0.31  |
| Estonia        | G0173     | 1              | 1.00 | 1.00 | 1.00 | 1.00 | 0.99 | 0.99 | 0.99 | 0.98  | 0.97  | 0.97  | 0.95  | 0.94  | 0.92  | 0.91  | 0.89  | 0.86  | 0.82  |
| Finland        | G0009     | 1              | 1.00 | 0.98 | 0.92 | 0.81 | 0.71 | 0.63 | 0.58 | 0.53  | 0.50  | 0.47  | 0.41  | 0.36  | 0.33  | 0.30  | 0.29  | 0.25  | 0.20  |
| Finland        | G0010     | 1              | 1.00 | 0.95 | 0.81 | 0.69 | 0.59 | 0.53 | 0.47 | 0.43  | 0.40  | 0.37  | 0.32  | 0.27  | 0.23  | 0.21  | 0.20  | 0.16  | 0.11  |
| Finland        | G0015     | 1              | 1.00 | 0.99 | 0.97 | 0.95 | 0.92 | 0.89 | 0.86 | 0.83  | 0.80  | 0.78  | 0.74  | 0.71  | 0.68  | 0.65  | 0.63  | 0.58  | 0.53  |
| Finland        | G0043     | 1              | 0.99 | 0.76 | 0.58 | 0.48 | 0.42 | 0.38 | 0.36 | 0.36  | 0.35  | 0.35  | 0.35  | 0.35  | 0.35  | 0.41  | 0.40  | 0.36  | 0.34  |
| Finland        | G0048     | 1              | 1.00 | 0.99 | 0.98 | 0.96 | 0.94 | 0.92 | 0.89 | 0.86  | 0.83  | 0.81  | 0.76  | 0.72  | 0.68  | 0.65  | 0.62  | 0.56  | 0.51  |
| Finland        | G0057     | 1              | 0.98 | 0.95 | 0.90 | 0.85 | 0.80 | 0.76 | 0.73 | 0.71  | 0.69  | 0.67  | 0.64  | 0.60  | 0.58  | 0.57  | 0.57  | 0.53  | 0.50  |
| Finland        | G0065     | 1              | 0.99 | 0.88 | 0.71 | 0.59 | 0.51 | 0.45 | 0.42 | 0.40  | 0.39  | 0.38  | 0.37  | 0.37  | 0.37  | 0.19  | 0.05  | 0.03  | 0.07  |
| Finland        | G0071     | 1              | 1.00 | 0.97 | 0.90 | 0.80 | 0.72 | 0.66 | 0.61 | 0.58  | 0.56  | 0.55  | 0.53  | 0.52  | 0.51  | 0.49  | 0.42  | 0.35  | 0.35  |
| Finland        | G0080     | 1              | 1.00 | 1.00 | 1.00 | 0.99 | 0.99 | 0.99 | 0.98 | 0.98  | 0.98  | 0.97  | 0.97  | 0.96  | 0.95  | 0.93  | 0.92  | 0.87  | 0.81  |
| Finland        | G0108     | 1              | 1.00 | 0.99 | 0.98 | 0.96 | 0.95 | 0.93 | 0.92 | 0.90  | 0.88  | 0.86  | 0.82  | 0.78  | 0.73  | 0.69  | 0.64  | 0.51  | 0.37  |
| Finland        | G0113     | 1              | 0.98 | 0.95 | 0.91 | 0.87 | 0.83 | 0.80 | 0.77 | 0.75  | 0.72  | 0.70  | 0.68  | 0.65  | 0.63  | 0.59  | 0.51  | 0.33  | 0.26  |
| Finland        | G0118     | 1              | 1.00 | 1.00 | 1.00 | 0.99 | 0.99 | 0.99 | 0.99 | 0.98  | 0.98  | 0.97  | 0.97  | 0.96  | 0.95  | 0.95  | 0.94  | 0.93  | 0.92  |
| Finland        | G0133     | 1              | 1.00 | 1.00 | 0.99 | 0.98 | 0.97 | 0.96 | 0.95 | 0.94  | 0.93  | 0.92  | 0.90  | 0.88  | 0.86  | 0.85  | 0.83  | 0.80  | 0.78  |
| Finland        | G0138     | 1              | 1.00 | 1.00 | 1.00 | 1.00 | 1.00 | 0.99 | 0.99 | 0.99  | 0.99  | 0.99  | 0.98  | 0.98  | 0.97  | 0.97  | 0.97  | 0.96  | 0.95  |
| Finland        | G0140     | 1              | 1.00 | 1.00 | 1.00 | 1.00 | 1.00 | 0.99 | 0.99 | 0.99  | 0.99  | 0.98  | 0.97  | 0.96  | 0.94  | 0.93  | 0.91  | 0.88  | 0.85  |
| Finland        | G0150     | 1              | 0.99 | 0.98 | 0.98 | 0.97 | 0.97 | 0.96 | 0.96 | 0.95  | 0.95  | 0.95  | 0.94  | 0.93  | 0.93  | 0.92  | 0.91  | 0.89  | 0.88  |
| Finland        | G2254     | 1              | 0.99 | 0.90 | 0.81 | 0.75 | 0.70 | 0.67 | 0.64 | 0.62  | 0.60  | 0.59  | 0.57  | 0.56  | 0.55  | 0.57  | 0.57  | 0.54  | 0.52  |
| Finland        | G2261     | 1              | 1.00 | 0.92 | 0.81 | 0.74 | 0.68 | 0.63 | 0.60 | 0.57  | 0.55  | 0.54  | 0.51  | 0.49  | 0.47  | 0.51  | 0.52  | 0.49  | 0.46  |
| Finland        | G2279     | 1              | 0.99 | 0.94 | 0.86 | 0.80 | 0.76 | 0.73 | 0.71 | 0.70  | 0.68  | 0.67  | 0.66  | 0.64  | 0.63  | 0.57  | 0.48  | 0.40  | 0.39  |
| Finland        | G2280     | 1              | 1.00 | 0.95 | 0.85 | 0.77 | 0.71 | 0.66 | 0.63 | 0.60  | 0.58  | 0.56  | 0.54  | 0.52  | 0.51  | 0.52  | 0.53  | 0.51  | 0.48  |
| Finland        | G2337     | 1              | 1.00 | 1.00 | 1.00 | 1.00 | 1.00 | 1.00 | 0.99 | 0.99  | 0.99  | 0.99  | 0.98  | 0.97  | 0.95  | 0.94  | 0.92  | 0.80  | 0.62  |
| Finland        | G2346     | 1              | 1.00 | 1.00 | 1.00 | 1.00 | 1.00 | 0.99 | 0.99 | 0.99  | 0.98  | 0.97  | 0.95  | 0.92  | 0.89  | 0.85  | 0.81  | 0.73  | 0.66  |

| Country | GloFAS ID | Station filter | LT1  | LT2  | LT3  | LT4  | LT5  | LT6   | LT7   | LT8   | LT9   | LT10  | LT12  | LT14  | LT16  | LT18  | LT20  | LT25  | L30   |
|---------|-----------|----------------|------|------|------|------|------|-------|-------|-------|-------|-------|-------|-------|-------|-------|-------|-------|-------|
| Finland | G2440     | 1              | 0.99 | 0.81 | 0.63 | 0.51 | 0.43 | 0.38  | 0.35  | 0.33  | 0.32  | 0.31  | 0.31  | 0.31  | 0.32  | 0.39  | 0.41  | 0.43  | 0.42  |
| Finland | G2449     | 1              | 0.99 | 0.91 | 0.74 | 0.62 | 0.54 | 0.48  | 0.45  | 0.43  | 0.41  | 0.40  | 0.38  | 0.37  | 0.37  | -0.04 | -0.31 | -0.37 | -0.28 |
| Finland | G2546     | 1              | 1.00 | 0.99 | 0.99 | 0.98 | 0.97 | 0.95  | 0.93  | 0.92  | 0.90  | 0.88  | 0.84  | 0.80  | 0.77  | 0.74  | 0.71  | 0.66  | 0.61  |
| Finland | G2788     | 1              | 1.00 | 1.00 | 1.00 | 1.00 | 1.00 | 1.00  | 0.99  | 0.99  | 0.99  | 0.99  | 0.99  | 0.98  | 0.98  | 0.97  | 0.96  | 0.92  | 0.87  |
| Finland | G2822     | 1              | 1.00 | 1.00 | 0.99 | 0.99 | 0.99 | 0.99  | 0.98  | 0.98  | 0.98  | 0.98  | 0.97  | 0.96  | 0.95  | 0.93  | 0.91  | 0.86  | 0.81  |
| Finland | G2831     | 1              | 1.00 | 1.00 | 0.99 | 0.99 | 0.99 | 0.98  | 0.98  | 0.97  | 0.97  | 0.96  | 0.95  | 0.94  | 0.93  | 0.92  | 0.91  | 0.89  | 0.87  |
| Finland | G2888     | 1              | 1.00 | 0.99 | 0.98 | 0.96 | 0.94 | 0.91  | 0.87  | 0.84  | 0.80  | 0.77  | 0.70  | 0.64  | 0.59  | 0.56  | 0.53  | 0.48  | 0.45  |
| France  | G0518     | 1              | 1.00 | 1.00 | 0.99 | 0.98 | 0.96 | 0.94  | 0.91  | 0.89  | 0.87  | 0.85  | 0.81  | 0.77  | 0.73  | 0.70  | 0.67  | 0.62  | 0.57  |
| France  | G0554     | 1              | 0.93 | 0.89 | 0.85 | 0.80 | 0.76 | 0.73  | 0.69  | 0.64  | 0.61  | 0.58  | 0.53  | 0.49  | 0.45  | 0.43  | 0.40  | 0.34  | 0.29  |
| France  | G0565     | 1              | 0.94 | 0.85 | 0.79 | 0.74 | 0.70 | 0.66  | 0.62  | 0.58  | 0.55  | 0.52  | 0.48  | 0.44  | 0.40  | 0.38  | 0.35  | 0.30  | 0.26  |
| France  | G0664     | 1              | 0.87 | 0.74 | 0.68 | 0.61 | 0.52 | 0.47  | 0.41  | 0.34  | 0.27  | 0.23  | 0.15  | 0.11  | 0.08  | 0.05  | 0.05  | 0.03  | 0.02  |
| France  | G1584     | 1              | 0.95 | 0.86 | 0.76 | 0.70 | 0.66 | 0.61  | 0.59  | 0.56  | 0.55  | 0.52  | 0.48  | 0.45  | 0.43  | 0.41  | 0.40  | 0.38  | 0.36  |
| France  | G1585     | 1              | 0.98 | 0.93 | 0.86 | 0.80 | 0.75 | 0.70  | 0.66  | 0.61  | 0.57  | 0.53  | 0.46  | 0.42  | 0.38  | 0.35  | 0.34  | 0.29  | 0.26  |
| France  | G1586     | 1              | 0.90 | 0.71 | 0.59 | 0.51 | 0.43 | 0.38  | 0.35  | 0.30  | 0.26  | 0.24  | 0.18  | 0.16  | 0.13  | 0.15  | 0.14  | 0.13  | 0.07  |
| France  | G1587     | 1              | 0.99 | 0.92 | 0.82 | 0.74 | 0.65 | 0.59  | 0.54  | 0.50  | 0.46  | 0.43  | 0.38  | 0.33  | 0.30  | 0.29  | 0.27  | 0.26  | 0.24  |
| France  | G1588     | 1              | 0.97 | 0.92 | 0.84 | 0.78 | 0.73 | 0.68  | 0.64  | 0.59  | 0.55  | 0.51  | 0.46  | 0.41  | 0.37  | 0.35  | 0.33  | 0.29  | 0.25  |
| France  | G1589     | 1              | 0.99 | 0.95 | 0.84 | 0.71 | 0.60 | 0.51  | 0.44  | 0.38  | 0.33  | 0.28  | 0.20  | 0.15  | 0.12  | 0.10  | 0.10  | 0.10  | 0.07  |
| France  | G1590     | 1              | 0.96 | 0.89 | 0.84 | 0.79 | 0.75 | 0.71  | 0.66  | 0.62  | 0.58  | 0.54  | 0.50  | 0.45  | 0.40  | 0.35  | 0.32  | 0.25  | 0.21  |
| France  | G1591     | 1              | 0.94 | 0.84 | 0.77 | 0.72 | 0.69 | 0.65  | 0.61  | 0.57  | 0.54  | 0.51  | 0.47  | 0.43  | 0.39  | 0.36  | 0.33  | 0.28  | 0.24  |
| France  | G1592     | 1              | 0.99 | 0.91 | 0.65 | 0.33 | 0.08 | -0.08 | -0.17 | -0.23 | -0.28 | -0.31 | -0.33 | -0.34 | -0.33 | -0.20 | -0.07 | 0.05  | 0.07  |
| France  | G1593     | 1              | 0.99 | 0.93 | 0.83 | 0.72 | 0.62 | 0.54  | 0.48  | 0.42  | 0.37  | 0.34  | 0.27  | 0.24  | 0.20  | 0.20  | 0.20  | 0.21  | 0.20  |
| France  | G1594     | 1              | 0.95 | 0.88 | 0.82 | 0.76 | 0.72 | 0.68  | 0.63  | 0.59  | 0.55  | 0.51  | 0.46  | 0.41  | 0.36  | 0.28  | 0.22  | 0.11  | 0.05  |
| France  | G1595     | 1              | 0.99 | 0.97 | 0.96 | 0.93 | 0.89 | 0.85  | 0.80  | 0.74  | 0.69  | 0.65  | 0.59  | 0.55  | 0.52  | 0.50  | 0.49  | 0.50  | 0.48  |
| France  | G1596     | 1              | 0.99 | 0.98 | 0.97 | 0.94 | 0.90 | 0.84  | 0.77  | 0.70  | 0.64  | 0.59  | 0.53  | 0.49  | 0.46  | 0.44  | 0.43  | 0.46  | 0.44  |
| France  | G1597     | 1              | 1.00 | 1.00 | 0.98 | 0.95 | 0.87 | 0.75  | 0.61  | 0.49  | 0.41  | 0.34  | 0.25  | 0.20  | 0.16  | 0.14  | 0.17  | 0.24  | 0.25  |
| France  | G1598     | 1              | 0.98 | 0.94 | 0.91 | 0.86 | 0.82 | 0.80  | 0.78  | 0.74  | 0.72  | 0.71  | 0.65  | 0.63  | 0.60  | 0.56  | 0.53  | 0.47  | 0.43  |
| France  | G1599     | 1              | 0.98 | 0.94 | 0.91 | 0.88 | 0.85 | 0.82  | 0.81  | 0.78  | 0.76  | 0.74  | 0.69  | 0.68  | 0.64  | 0.64  | 0.62  | 0.61  | 0.58  |
| France  | G1600     | 1              | 1.00 | 1.00 | 0.98 | 0.97 | 0.95 | 0.92  | 0.89  | 0.87  | 0.85  | 0.83  | 0.79  | 0.75  | 0.73  | 0.71  | 0.69  | 0.66  | 0.63  |
| France  | G1601     | 1              | 1.00 | 0.98 | 0.95 | 0.90 | 0.87 | 0.83  | 0.80  | 0.78  | 0.76  | 0.74  | 0.71  | 0.67  | 0.65  | 0.62  | 0.60  | 0.57  | 0.54  |
| France  | G3694     | 1              | 0.97 | 0.92 | 0.89 | 0.84 | 0.81 | 0.79  | 0.76  | 0.74  | 0.72  | 0.72  | 0.68  | 0.65  | 0.62  | 0.61  | 0.59  | 0.58  | 0.56  |
| France  | G3695     | 1              | 0.99 | 0.98 | 0.97 | 0.95 | 0.91 | 0.85  | 0.78  | 0.71  | 0.65  | 0.61  | 0.54  | 0.50  | 0.47  | 0.45  | 0.44  | 0.46  | 0.45  |
| France  | G3699     | 1              | 0.97 | 0.91 | 0.85 | 0.79 | 0.74 | 0.73  | 0.70  | 0.67  | 0.66  | 0.65  | 0.60  | 0.60  | 0.57  | 0.57  | 0.55  | 0.53  | 0.51  |
| France  | G3716     | 1              | 1.00 | 0.99 | 0.98 | 0.96 | 0.94 | 0.91  | 0.89  | 0.87  | 0.85  | 0.82  | 0.78  | 0.74  | 0.70  | 0.67  | 0.64  | 0.58  | 0.53  |
| France  | G3851     | 1              | 0.96 | 0.89 | 0.79 | 0.72 | 0.67 | 0.62  | 0.59  | 0.55  | 0.53  | 0.50  | 0.44  | 0.41  | 0.39  | 0.37  | 0.36  | 0.33  | 0.32  |
| Germany | G0292     | 1              | 1.00 | 0.99 | 0.96 | 0.92 | 0.86 | 0.78  | 0.70  | 0.64  | 0.59  | 0.53  | 0.46  | 0.40  | 0.37  | 0.34  | 0.32  | 0.28  | 0.25  |
| Germany | G0297     | 1              | 1.00 | 0.99 | 0.96 | 0.91 | 0.84 | 0.76  | 0.68  | 0.62  | 0.56  | 0.51  | 0.44  | 0.38  | 0.35  | 0.33  | 0.31  | 0.27  | 0.24  |
| Germany | G0298     | 1              | 0.99 | 0.96 | 0.88 | 0.80 | 0.75 | 0.70  | 0.67  | 0.65  | 0.63  | 0.61  | 0.59  | 0.57  | 0.56  | 0.54  | 0.52  | 0.49  | 0.47  |
| Germany | G0301     | 1              | 1.00 | 0.99 | 0.96 | 0.90 | 0.84 | 0.78  | 0.73  | 0.69  | 0.66  | 0.63  | 0.60  | 0.58  | 0.56  | 0.56  | 0.55  | 0.53  | 0.52  |
| Germany | G0304     | 1              | 0.99 | 0.94 | 0.82 | 0.72 | 0.66 | 0.60  | 0.57  | 0.55  | 0.54  | 0.52  | 0.51  | 0.50  | 0.49  | 0.47  | 0.46  | 0.45  | 0.43  |

| Country | GloFAS ID | Station filter | LT1  | LT2  | LT3  | LT4  | LT5  | LT6  | LT7  | LT8  | LT9  | LT10 | LT12 | LT14 | LT16 | LT18 | LT20 | LT25 | L30  |
|---------|-----------|----------------|------|------|------|------|------|------|------|------|------|------|------|------|------|------|------|------|------|
| Germany | G0306     | 1              | 1.00 | 1.00 | 0.99 | 0.98 | 0.96 | 0.93 | 0.89 | 0.85 | 0.81 | 0.77 | 0.70 | 0.64 | 0.59 | 0.55 | 0.52 | 0.45 | 0.40 |
| Germany | G0309     | 1              | 1.00 | 0.99 | 0.99 | 0.97 | 0.96 | 0.94 | 0.92 | 0.90 | 0.88 | 0.86 | 0.83 | 0.79 | 0.75 | 0.73 | 0.71 | 0.68 | 0.66 |
| Germany | G0310     | 1              | 1.00 | 0.99 | 0.99 | 0.97 | 0.96 | 0.94 | 0.92 | 0.90 | 0.88 | 0.86 | 0.83 | 0.79 | 0.75 | 0.73 | 0.71 | 0.68 | 0.66 |
| Germany | G0311     | 1              | 0.99 | 0.92 | 0.78 | 0.69 | 0.62 | 0.57 | 0.54 | 0.52 | 0.50 | 0.49 | 0.48 | 0.46 | 0.45 | 0.44 | 0.42 | 0.41 | 0.40 |
| Germany | G0313     | 1              | 1.00 | 0.99 | 0.96 | 0.91 | 0.84 | 0.75 | 0.67 | 0.61 | 0.55 | 0.49 | 0.42 | 0.37 | 0.33 | 0.30 | 0.28 | 0.25 | 0.22 |
| Germany | G0316     | 1              | 1.00 | 0.98 | 0.97 | 0.95 | 0.93 | 0.91 | 0.89 | 0.87 | 0.84 | 0.82 | 0.77 | 0.74 | 0.71 | 0.70 | 0.69 | 0.66 | 0.64 |
| Germany | G0320     | 1              | 0.99 | 0.91 | 0.78 | 0.68 | 0.61 | 0.56 | 0.53 | 0.51 | 0.49 | 0.48 | 0.47 | 0.45 | 0.44 | 0.43 | 0.42 | 0.41 | 0.39 |
| Germany | G0321     | 1              | 0.98 | 0.90 | 0.75 | 0.65 | 0.58 | 0.52 | 0.49 | 0.47 | 0.45 | 0.44 | 0.43 | 0.41 | 0.40 | 0.39 | 0.37 | 0.37 | 0.35 |
| Germany | G0323     | 1              | 0.98 | 0.86 | 0.71 | 0.59 | 0.49 | 0.42 | 0.37 | 0.33 | 0.31 | 0.29 | 0.26 | 0.25 | 0.23 | 0.22 | 0.21 | 0.20 | 0.20 |
| Germany | G0325     | 1              | 1.00 | 0.99 | 0.96 | 0.90 | 0.83 | 0.74 | 0.66 | 0.60 | 0.53 | 0.48 | 0.42 | 0.36 | 0.32 | 0.30 | 0.28 | 0.24 | 0.22 |
| Germany | G0329     | 1              | 1.00 | 0.99 | 0.96 | 0.90 | 0.83 | 0.74 | 0.66 | 0.60 | 0.53 | 0.48 | 0.42 | 0.36 | 0.32 | 0.30 | 0.28 | 0.24 | 0.22 |
| Germany | G0330     | 1              | 0.97 | 0.84 | 0.69 | 0.59 | 0.52 | 0.47 | 0.44 | 0.42 | 0.41 | 0.40 | 0.38 | 0.37 | 0.36 | 0.35 | 0.33 | 0.33 | 0.31 |
| Germany | G0331     | 1              | 1.00 | 1.00 | 0.99 | 0.96 | 0.92 | 0.87 | 0.80 | 0.73 | 0.65 | 0.58 | 0.47 | 0.39 | 0.34 | 0.30 | 0.28 | 0.23 | 0.20 |
| Germany | G0332     | 1              | 1.00 | 0.99 | 0.95 | 0.87 | 0.78 | 0.68 | 0.60 | 0.54 | 0.48 | 0.43 | 0.38 | 0.33 | 0.31 | 0.29 | 0.27 | 0.25 | 0.22 |
| Germany | G0333     | 1              | 1.00 | 0.98 | 0.93 | 0.85 | 0.74 | 0.64 | 0.58 | 0.52 | 0.46 | 0.43 | 0.38 | 0.34 | 0.30 | 0.30 | 0.28 | 0.27 | 0.24 |
| Germany | G0340     | 1              | 1.00 | 0.98 | 0.93 | 0.88 | 0.82 | 0.77 | 0.73 | 0.69 | 0.65 | 0.62 | 0.57 | 0.53 | 0.49 | 0.45 | 0.42 | 0.37 | 0.32 |
| Germany | G0345     | 1              | 0.97 | 0.83 | 0.68 | 0.57 | 0.50 | 0.45 | 0.42 | 0.41 | 0.39 | 0.38 | 0.36 | 0.36 | 0.34 | 0.33 | 0.31 | 0.31 | 0.30 |
| Germany | G0346     | 1              | 0.97 | 0.82 | 0.66 | 0.56 | 0.48 | 0.43 | 0.40 | 0.39 | 0.37 | 0.36 | 0.35 | 0.34 | 0.32 | 0.31 | 0.29 | 0.29 | 0.28 |
| Germany | G0348     | 1              | 0.99 | 0.93 | 0.83 | 0.71 | 0.62 | 0.55 | 0.49 | 0.44 | 0.41 | 0.39 | 0.34 | 0.32 | 0.29 | 0.28 | 0.27 | 0.26 | 0.24 |
| Germany | G0349     | 1              | 1.00 | 0.99 | 0.96 | 0.88 | 0.79 | 0.70 | 0.61 | 0.53 | 0.47 | 0.42 | 0.35 | 0.31 | 0.28 | 0.26 | 0.24 | 0.20 | 0.18 |
| Germany | G0353     | 1              | 0.97 | 0.81 | 0.66 | 0.55 | 0.48 | 0.43 | 0.40 | 0.38 | 0.37 | 0.36 | 0.34 | 0.34 | 0.32 | 0.31 | 0.29 | 0.29 | 0.28 |
| Germany | G0355     | 1              | 1.00 | 0.98 | 0.93 | 0.87 | 0.80 | 0.75 | 0.71 | 0.67 | 0.64 | 0.61 | 0.55 | 0.51 | 0.47 | 0.44 | 0.40 | 0.36 | 0.31 |
| Germany | G0356     | 1              | 0.98 | 0.90 | 0.78 | 0.67 | 0.58 | 0.52 | 0.47 | 0.42 | 0.39 | 0.37 | 0.33 | 0.31 | 0.28 | 0.28 | 0.27 | 0.26 | 0.23 |
| Germany | G0358     | 1              | 1.00 | 0.98 | 0.92 | 0.86 | 0.80 | 0.75 | 0.71 | 0.67 | 0.63 | 0.60 | 0.55 | 0.51 | 0.47 | 0.43 | 0.40 | 0.36 | 0.31 |
| Germany | G0380     | 1              | 1.00 | 0.97 | 0.92 | 0.85 | 0.79 | 0.74 | 0.69 | 0.65 | 0.62 | 0.59 | 0.53 | 0.49 | 0.45 | 0.42 | 0.38 | 0.34 | 0.30 |
| Germany | G0386     | 1              | 0.99 | 0.91 | 0.78 | 0.69 | 0.63 | 0.59 | 0.56 | 0.54 | 0.53 | 0.52 | 0.50 | 0.49 | 0.47 | 0.46 | 0.45 | 0.42 | 0.39 |
| Germany | G0390     | 1              | 0.99 | 0.91 | 0.76 | 0.66 | 0.60 | 0.55 | 0.52 | 0.51 | 0.49 | 0.48 | 0.48 | 0.47 | 0.46 | 0.48 | 0.47 | 0.45 | 0.41 |
| Germany | G0391     | 1              | 1.00 | 0.98 | 0.94 | 0.87 | 0.81 | 0.76 | 0.71 | 0.66 | 0.62 | 0.59 | 0.52 | 0.47 | 0.43 | 0.39 | 0.36 | 0.31 | 0.27 |
| Germany | G0394     | 1              | 0.99 | 0.83 | 0.68 | 0.60 | 0.54 | 0.50 | 0.48 | 0.47 | 0.46 | 0.45 | 0.45 | 0.45 | 0.44 | 0.44 | 0.43 | 0.40 | 0.37 |
| Germany | G0395     | 1              | 0.99 | 0.86 | 0.69 | 0.59 | 0.52 | 0.48 | 0.45 | 0.44 | 0.42 | 0.42 | 0.41 | 0.41 | 0.41 | 0.42 | 0.42 | 0.40 | 0.37 |
| Germany | G0396     | 1              | 1.00 | 0.97 | 0.92 | 0.86 | 0.79 | 0.74 | 0.69 | 0.65 | 0.61 | 0.57 | 0.51 | 0.46 | 0.42 | 0.38 | 0.35 | 0.31 | 0.26 |
| Germany | G0399     | 1              | 0.99 | 0.80 | 0.66 | 0.59 | 0.53 | 0.50 | 0.48 | 0.46 | 0.45 | 0.45 | 0.45 | 0.45 | 0.44 | 0.44 | 0.43 | 0.40 | 0.36 |
| Germany | G0405     | 1              | 0.99 | 0.84 | 0.67 | 0.57 | 0.51 | 0.47 | 0.44 | 0.43 | 0.42 | 0.41 | 0.41 | 0.41 | 0.41 | 0.43 | 0.42 | 0.40 | 0.37 |
| Germany | G0411     | 1              | 0.98 | 0.88 | 0.74 | 0.66 | 0.61 | 0.57 | 0.54 | 0.52 | 0.51 | 0.51 | 0.49 | 0.48 | 0.46 | 0.45 | 0.45 | 0.41 | 0.38 |
| Germany | G0412     | 1              | 0.99 | 0.89 | 0.72 | 0.61 | 0.55 | 0.50 | 0.47 | 0.45 | 0.44 | 0.43 | 0.43 | 0.42 | 0.42 | 0.44 | 0.44 | 0.42 | 0.39 |
| Germany | G0416     | 1              | 0.98 | 0.94 | 0.87 | 0.81 | 0.75 | 0.71 | 0.66 | 0.61 | 0.58 | 0.54 | 0.47 | 0.43 | 0.38 | 0.34 | 0.31 | 0.26 | 0.22 |
| Germany | G0422     | 1              | 0.97 | 0.82 | 0.67 | 0.57 | 0.51 | 0.47 | 0.44 | 0.41 | 0.41 | 0.40 | 0.38 | 0.37 | 0.35 | 0.32 | 0.31 | 0.28 | 0.26 |
| Germany | G0423     | 1              | 1.00 | 0.98 | 0.92 | 0.84 | 0.76 | 0.70 | 0.65 | 0.61 | 0.58 | 0.56 | 0.51 | 0.48 | 0.45 | 0.42 | 0.39 | 0.33 | 0.28 |
| Germany | G0426     | 1              | 0.98 | 0.92 | 0.86 | 0.79 | 0.74 | 0.69 | 0.63 | 0.58 | 0.54 | 0.51 | 0.43 | 0.38 | 0.34 | 0.29 | 0.26 | 0.22 | 0.18 |

| Country | GloFAS ID | Station filter | LT1  | LT2  | LT3  | LT4  | LT5  | LT6  | LT7  | LT8  | LT9  | LT10 | LT12  | LT14  | LT16  | LT18  | LT20  | LT25  | L30   |
|---------|-----------|----------------|------|------|------|------|------|------|------|------|------|------|-------|-------|-------|-------|-------|-------|-------|
| Germany | G0428     | 1              | 0.97 | 0.91 | 0.84 | 0.78 | 0.72 | 0.67 | 0.62 | 0.57 | 0.54 | 0.50 | 0.43  | 0.37  | 0.33  | 0.28  | 0.25  | 0.22  | 0.18  |
| Germany | G0429     | 1              | 0.99 | 0.95 | 0.91 | 0.86 | 0.81 | 0.75 | 0.68 | 0.61 | 0.55 | 0.49 | 0.43  | 0.39  | 0.36  | 0.33  | 0.31  | 0.30  | 0.30  |
| Germany | G0436     | 1              | 1.00 | 0.98 | 0.95 | 0.88 | 0.79 | 0.69 | 0.58 | 0.48 | 0.40 | 0.33 | 0.24  | 0.20  | 0.18  | 0.17  | 0.17  | 0.16  | 0.18  |
| Germany | G0439     | 1              | 0.99 | 0.96 | 0.91 | 0.87 | 0.82 | 0.76 | 0.69 | 0.62 | 0.55 | 0.50 | 0.43  | 0.39  | 0.36  | 0.33  | 0.31  | 0.29  | 0.29  |
| Germany | G0444     | 1              | 1.00 | 0.99 | 0.96 | 0.90 | 0.81 | 0.70 | 0.59 | 0.49 | 0.41 | 0.34 | 0.26  | 0.22  | 0.20  | 0.20  | 0.19  | 0.18  | 0.20  |
| Germany | G0445     | 1              | 0.99 | 0.96 | 0.90 | 0.82 | 0.75 | 0.68 | 0.61 | 0.54 | 0.48 | 0.44 | 0.37  | 0.34  | 0.32  | 0.30  | 0.29  | 0.28  | 0.28  |
| Germany | G0450     | 1              | 1.00 | 0.98 | 0.95 | 0.89 | 0.82 | 0.73 | 0.64 | 0.56 | 0.48 | 0.43 | 0.34  | 0.30  | 0.28  | 0.25  | 0.24  | 0.21  | 0.21  |
| Germany | G0454     | 1              | 1.00 | 1.00 | 0.97 | 0.91 | 0.82 | 0.71 | 0.59 | 0.50 | 0.42 | 0.36 | 0.27  | 0.23  | 0.20  | 0.18  | 0.16  | 0.13  | 0.12  |
| Germany | G0475     | 1              | 0.94 | 0.77 | 0.50 | 0.32 | 0.22 | 0.15 | 0.08 | 0.04 | 0.02 | 0.00 | -0.02 | -0.02 | -0.04 | -0.07 | -0.06 | -0.05 | -0.07 |
| Germany | G0492     | 1              | 0.93 | 0.79 | 0.67 | 0.60 | 0.55 | 0.49 | 0.44 | 0.40 | 0.35 | 0.32 | 0.29  | 0.24  | 0.21  | 0.20  | 0.19  | 0.19  | 0.15  |
| Germany | G0500     | 1              | 0.97 | 0.92 | 0.85 | 0.78 | 0.73 | 0.67 | 0.62 | 0.57 | 0.53 | 0.49 | 0.42  | 0.36  | 0.32  | 0.29  | 0.26  | 0.21  | 0.17  |
| Germany | G3366     | 1              | 0.99 | 0.94 | 0.89 | 0.85 | 0.81 | 0.79 | 0.76 | 0.75 | 0.73 | 0.71 | 0.68  | 0.66  | 0.64  | 0.64  | 0.63  | 0.61  | 0.59  |
| Germany | G3542     | 1              | 1.00 | 0.96 | 0.83 | 0.72 | 0.64 | 0.58 | 0.55 | 0.53 | 0.51 | 0.50 | 0.49  | 0.48  | 0.47  | 0.48  | 0.47  | 0.45  | 0.42  |
| Germany | G3648     | 1              | 1.00 | 0.97 | 0.88 | 0.69 | 0.47 | 0.32 | 0.22 | 0.14 | 0.08 | 0.04 | -0.01 | -0.02 | -0.03 | -0.06 | -0.07 | -0.06 | -0.07 |
| Germany | G3657     | 1              | 0.99 | 0.93 | 0.84 | 0.75 | 0.67 | 0.62 | 0.58 | 0.53 | 0.49 | 0.45 | 0.40  | 0.38  | 0.34  | 0.33  | 0.31  | 0.29  | 0.26  |
| Hungary | G0484     | 1              | 1.00 | 0.99 | 0.98 | 0.95 | 0.91 | 0.85 | 0.78 | 0.72 | 0.66 | 0.60 | 0.51  | 0.45  | 0.39  | 0.34  | 0.29  | 0.19  | 0.14  |
| Hungary | G0486     | 1              | 0.99 | 0.93 | 0.81 | 0.68 | 0.58 | 0.51 | 0.47 | 0.43 | 0.39 | 0.38 | 0.35  | 0.33  | 0.30  | 0.26  | 0.22  | 0.18  | 0.19  |
| Hungary | G0489     | 1              | 1.00 | 0.99 | 0.97 | 0.94 | 0.90 | 0.86 | 0.81 | 0.75 | 0.69 | 0.63 | 0.52  | 0.44  | 0.39  | 0.35  | 0.32  | 0.28  | 0.27  |
| Hungary | G0491     | 1              | 1.00 | 0.98 | 0.95 | 0.92 | 0.88 | 0.83 | 0.78 | 0.71 | 0.65 | 0.59 | 0.49  | 0.42  | 0.38  | 0.34  | 0.32  | 0.28  | 0.26  |
| Hungary | G0517     | 1              | 1.00 | 1.00 | 0.99 | 0.99 | 0.98 | 0.96 | 0.92 | 0.87 | 0.82 | 0.76 | 0.64  | 0.55  | 0.47  | 0.41  | 0.36  | 0.23  | 0.16  |
| Hungary | G0550     | 1              | 1.00 | 0.99 | 0.97 | 0.94 | 0.90 | 0.85 | 0.81 | 0.77 | 0.72 | 0.67 | 0.58  | 0.49  | 0.42  | 0.35  | 0.28  | 0.18  | 0.13  |
| Hungary | G0551     | 1              | 0.99 | 0.94 | 0.86 | 0.75 | 0.64 | 0.55 | 0.48 | 0.42 | 0.37 | 0.32 | 0.25  | 0.21  | 0.17  | 0.12  | 0.06  | 0.03  | 0.03  |
| Hungary | G0560     | 1              | 1.00 | 1.00 | 0.99 | 0.98 | 0.96 | 0.93 | 0.90 | 0.86 | 0.81 | 0.75 | 0.64  | 0.53  | 0.45  | 0.40  | 0.36  | 0.30  | 0.28  |
| Hungary | G3658     | 1              | 1.00 | 0.99 | 0.97 | 0.92 | 0.86 | 0.80 | 0.73 | 0.68 | 0.63 | 0.58 | 0.52  | 0.46  | 0.41  | 0.36  | 0.32  | 0.21  | 0.18  |
| Hungary | G3678     | 1              | 0.99 | 0.97 | 0.93 | 0.90 | 0.85 | 0.80 | 0.73 | 0.67 | 0.60 | 0.55 | 0.46  | 0.40  | 0.37  | 0.34  | 0.32  | 0.29  | 0.27  |
| Hungary | G3683     | 1              | 0.99 | 0.96 | 0.90 | 0.83 | 0.78 | 0.72 | 0.67 | 0.62 | 0.58 | 0.54 | 0.47  | 0.42  | 0.37  | 0.34  | 0.32  | 0.29  | 0.29  |
| Hungary | G3712     | 1              | 0.99 | 0.92 | 0.84 | 0.76 | 0.67 | 0.59 | 0.52 | 0.45 | 0.39 | 0.33 | 0.23  | 0.17  | 0.11  | 0.05  | 0.00  | -0.10 | -0.13 |
| Hungary | G3717     | 1              | 1.00 | 0.99 | 0.96 | 0.91 | 0.84 | 0.77 | 0.71 | 0.65 | 0.59 | 0.54 | 0.45  | 0.38  | 0.32  | 0.27  | 0.23  | 0.17  | 0.14  |
| Hungary | G3718     | 1              | 0.99 | 0.94 | 0.88 | 0.81 | 0.75 | 0.69 | 0.65 | 0.60 | 0.56 | 0.53 | 0.47  | 0.42  | 0.38  | 0.35  | 0.33  | 0.30  | 0.29  |
| Italy   | G0568     | 1              | 0.98 | 0.92 | 0.85 | 0.79 | 0.74 | 0.67 | 0.62 | 0.59 | 0.54 | 0.50 | 0.43  | 0.37  | 0.34  | 0.31  | 0.28  | 0.25  | 0.24  |
| Italy   | G0570     | 1              | 1.00 | 0.98 | 0.95 | 0.92 | 0.88 | 0.85 | 0.81 | 0.77 | 0.73 | 0.69 | 0.62  | 0.54  | 0.48  | 0.43  | 0.38  | 0.30  | 0.24  |
| Italy   | G0593     | 1              | 0.99 | 0.95 | 0.89 | 0.81 | 0.72 | 0.63 | 0.54 | 0.47 | 0.40 | 0.34 | 0.24  | 0.17  | 0.10  | 0.05  | 0.02  | 0.02  | 0.03  |
| Italy   | G0595     | 1              | 1.00 | 0.97 | 0.92 | 0.86 | 0.80 | 0.75 | 0.69 | 0.65 | 0.61 | 0.57 | 0.50  | 0.43  | 0.38  | 0.35  | 0.33  | 0.27  | 0.23  |
| Italy   | G0604     | 1              | 1.00 | 0.98 | 0.94 | 0.89 | 0.84 | 0.79 | 0.73 | 0.69 | 0.65 | 0.60 | 0.53  | 0.46  | 0.40  | 0.37  | 0.34  | 0.28  | 0.24  |
| Italy   | G0606     | 1              | 1.00 | 0.99 | 0.98 | 0.96 | 0.92 | 0.89 | 0.84 | 0.80 | 0.75 | 0.71 | 0.63  | 0.56  | 0.49  | 0.43  | 0.40  | 0.33  | 0.28  |
| Italy   | G1829     | 1              | 1.00 | 0.99 | 0.96 | 0.92 | 0.88 | 0.83 | 0.78 | 0.73 | 0.68 | 0.64 | 0.57  | 0.49  | 0.42  | 0.38  | 0.36  | 0.29  | 0.25  |
| Italy   | G1830     | 1              | 1.00 | 0.98 | 0.94 | 0.89 | 0.83 | 0.78 | 0.73 | 0.68 | 0.64 | 0.60 | 0.53  | 0.46  | 0.40  | 0.37  | 0.34  | 0.28  | 0.24  |
| Italy   | G1831     | 1              | 0.99 | 0.91 | 0.82 | 0.75 | 0.68 | 0.62 | 0.56 | 0.52 | 0.48 | 0.45 | 0.38  | 0.31  | 0.29  | 0.29  | 0.27  | 0.24  | 0.21  |
| Italy   | G1832     | 1              | 1.00 | 0.99 | 0.96 | 0.93 | 0.89 | 0.86 | 0.82 | 0.78 | 0.74 | 0.71 | 0.63  | 0.56  | 0.49  | 0.44  | 0.40  | 0.31  | 0.25  |

| Country     | GloFAS ID | Station filter | LT1  | LT2  | LT3  | LT4  | LT5  | LT6  | LT7  | LT8  | LT9   | LT10  | LT12  | LT14  | LT16  | LT18  | LT20  | LT25  | L30   |
|-------------|-----------|----------------|------|------|------|------|------|------|------|------|-------|-------|-------|-------|-------|-------|-------|-------|-------|
| Italy       | G1833     | 1              | 0.96 | 0.83 | 0.72 | 0.64 | 0.57 | 0.51 | 0.46 | 0.41 | 0.38  | 0.35  | 0.29  | 0.24  | 0.23  | 0.22  | 0.20  | 0.16  | 0.13  |
| Italy       | G1921     | 1              | 0.96 | 0.85 | 0.74 | 0.63 | 0.56 | 0.48 | 0.42 | 0.36 | 0.30  | 0.27  | 0.21  | 0.17  | 0.12  | 0.09  | 0.08  | 0.04  | 0.04  |
| Italy       | G3820     | 1              | 0.96 | 0.86 | 0.76 | 0.68 | 0.62 | 0.55 | 0.50 | 0.45 | 0.41  | 0.39  | 0.32  | 0.26  | 0.24  | 0.24  | 0.21  | 0.16  | 0.13  |
| Italy       | G3821     | 1              | 1.00 | 1.00 | 0.98 | 0.96 | 0.91 | 0.86 | 0.78 | 0.70 | 0.62  | 0.55  | 0.41  | 0.30  | 0.21  | 0.14  | 0.08  | 0.02  | 0.03  |
| Italy       | G3822     | 1              | 1.00 | 1.00 | 0.99 | 0.97 | 0.95 | 0.91 | 0.87 | 0.83 | 0.78  | 0.74  | 0.66  | 0.59  | 0.51  | 0.45  | 0.41  | 0.34  | 0.29  |
| Latvia      | G0242     | 1              | 1.00 | 1.00 | 0.99 | 0.96 | 0.92 | 0.87 | 0.80 | 0.74 | 0.68  | 0.63  | 0.55  | 0.51  | 0.49  | 0.47  | 0.46  | 0.43  | 0.41  |
| Latvia      | G3161     | 1              | 1.00 | 1.00 | 0.99 | 0.97 | 0.93 | 0.89 | 0.84 | 0.79 | 0.74  | 0.70  | 0.63  | 0.56  | 0.51  | 0.49  | 0.48  | 0.52  | 0.52  |
| Latvia      | G3164     | 1              | 1.00 | 1.00 | 1.00 | 0.99 | 0.98 | 0.95 | 0.92 | 0.87 | 0.81  | 0.75  | 0.64  | 0.56  | 0.50  | 0.47  | 0.45  | 0.42  | 0.40  |
| Lithuania   | G0260     | 1              | 1.00 | 0.98 | 0.92 | 0.85 | 0.78 | 0.73 | 0.69 | 0.65 | 0.63  | 0.61  | 0.58  | 0.56  | 0.55  | 0.56  | 0.57  | 0.58  | 0.57  |
| Lithuania   | G0261     | 1              | 1.00 | 1.00 | 0.99 | 0.97 | 0.93 | 0.88 | 0.83 | 0.78 | 0.74  | 0.70  | 0.64  | 0.59  | 0.56  | 0.54  | 0.54  | 0.53  | 0.53  |
| Lithuania   | G3266     | 1              | 1.00 | 0.99 | 0.97 | 0.93 | 0.89 | 0.85 | 0.81 | 0.78 | 0.75  | 0.72  | 0.67  | 0.63  | 0.60  | 0.59  | 0.59  | 0.59  | 0.58  |
| Lithuania   | G3267     | 1              | 1.00 | 0.99 | 0.98 | 0.97 | 0.95 | 0.92 | 0.90 | 0.87 | 0.84  | 0.80  | 0.73  | 0.67  | 0.63  | 0.61  | 0.59  | 0.57  | 0.56  |
| Macedonia   | G3904     | 1              | 0.97 | 0.89 | 0.77 | 0.66 | 0.57 | 0.48 | 0.39 | 0.31 | 0.23  | 0.15  | 0.02  | -0.07 | -0.13 | -0.18 | -0.23 | -0.26 | -0.28 |
| Moldova     | G0525     | 1              | 1.00 | 1.00 | 1.00 | 1.00 | 1.00 | 0.99 | 0.99 | 0.99 | 0.99  | 0.99  | 0.98  | 0.98  | 0.97  | 0.96  | 0.95  | 0.91  | 0.84  |
| Moldova     | G1942     | 1              | 1.00 | 1.00 | 1.00 | 1.00 | 1.00 | 0.99 | 0.99 | 0.99 | 0.99  | 0.99  | 0.98  | 0.98  | 0.98  | 0.97  | 0.96  | 0.94  | 0.89  |
| Netherlands | G0337     | 1              | 1.00 | 0.98 | 0.94 | 0.89 | 0.83 | 0.78 | 0.74 | 0.70 | 0.66  | 0.63  | 0.58  | 0.53  | 0.49  | 0.46  | 0.42  | 0.37  | 0.33  |
| Netherlands | G0338     | 1              | 0.99 | 0.93 | 0.80 | 0.70 | 0.63 | 0.59 | 0.57 | 0.55 | 0.55  | 0.54  | 0.54  | 0.53  | 0.53  | 0.53  | 0.53  | 0.50  | 0.47  |
| Netherlands | G0339     | 1              | 0.99 | 0.91 | 0.78 | 0.68 | 0.62 | 0.59 | 0.57 | 0.55 | 0.55  | 0.54  | 0.54  | 0.53  | 0.53  | 0.52  | 0.50  | 0.48  | 0.45  |
| Netherlands | G0343     | 1              | 0.99 | 0.90 | 0.77 | 0.68 | 0.62 | 0.58 | 0.56 | 0.55 | 0.54  | 0.54  | 0.53  | 0.53  | 0.52  | 0.51  | 0.49  | 0.47  | 0.44  |
| Netherlands | G0359     | 1              | 0.99 | 0.86 | 0.73 | 0.64 | 0.58 | 0.55 | 0.53 | 0.52 | 0.51  | 0.51  | 0.51  | 0.50  | 0.50  | 0.48  | 0.47  | 0.45  | 0.42  |
| Netherlands | G0361     | 1              | 0.99 | 0.86 | 0.72 | 0.63 | 0.57 | 0.54 | 0.52 | 0.51 | 0.51  | 0.50  | 0.50  | 0.50  | 0.49  | 0.48  | 0.47  | 0.44  | 0.42  |
| Netherlands | G0362     | 1              | 0.99 | 0.86 | 0.72 | 0.63 | 0.57 | 0.54 | 0.52 | 0.51 | 0.51  | 0.50  | 0.50  | 0.50  | 0.49  | 0.48  | 0.47  | 0.44  | 0.42  |
| Netherlands | G0365     | 1              | 0.99 | 0.84 | 0.71 | 0.61 | 0.56 | 0.53 | 0.51 | 0.50 | 0.49  | 0.49  | 0.49  | 0.49  | 0.48  | 0.47  | 0.45  | 0.43  | 0.40  |
| Netherlands | G3415     | 1              | 1.00 | 1.00 | 1.00 | 0.99 | 0.97 | 0.94 | 0.89 | 0.84 | 0.80  | 0.75  | 0.68  | 0.62  | 0.57  | 0.52  | 0.49  | 0.41  | 0.36  |
| Netherlands | G3422     | 1              | 1.00 | 1.00 | 0.99 | 0.96 | 0.89 | 0.82 | 0.74 | 0.68 | 0.64  | 0.60  | 0.57  | 0.55  | 0.54  | 0.54  | 0.53  | 0.52  | 0.50  |
| Norway      | G0007     | 1              | 1.00 | 0.99 | 0.93 | 0.83 | 0.73 | 0.65 | 0.59 | 0.55 | 0.51  | 0.48  | 0.43  | 0.38  | 0.34  | 0.31  | 0.30  | 0.26  | 0.21  |
| Norway      | G0008     | 1              | 1.00 | 1.00 | 1.00 | 0.99 | 0.98 | 0.97 | 0.94 | 0.89 | 0.84  | 0.78  | 0.68  | 0.60  | 0.55  | 0.50  | 0.47  | 0.42  | 0.38  |
| Norway      | G0134     | 1              | 0.99 | 0.88 | 0.61 | 0.39 | 0.25 | 0.16 | 0.09 | 0.03 | -0.01 | -0.04 | -0.12 | -0.18 | -0.24 | -0.34 | -0.34 | -0.34 | -0.40 |
| Norway      | G0145     | 1              | 0.97 | 0.79 | 0.56 | 0.40 | 0.29 | 0.21 | 0.16 | 0.12 | 0.09  | 0.06  | 0.03  | 0.00  | -0.04 | -0.07 | -0.09 | -0.14 | -0.18 |
| Norway      | G0157     | 1              | 0.99 | 0.85 | 0.59 | 0.41 | 0.28 | 0.20 | 0.14 | 0.10 | 0.07  | 0.05  | 0.01  | -0.01 | -0.04 | -0.06 | -0.07 | -0.10 | -0.14 |
| Norway      | G0161     | 1              | 0.99 | 0.92 | 0.75 | 0.60 | 0.49 | 0.40 | 0.32 | 0.26 | 0.21  | 0.17  | 0.11  | 0.08  | 0.06  | 0.08  | 0.11  | 0.09  | 0.01  |
| Norway      | G0168     | 1              | 0.99 | 0.91 | 0.76 | 0.64 | 0.56 | 0.49 | 0.44 | 0.41 | 0.37  | 0.35  | 0.30  | 0.26  | 0.22  | 0.18  | 0.15  | 0.08  | 0.01  |
| Norway      | G0170     | 1              | 1.00 | 0.98 | 0.90 | 0.77 | 0.66 | 0.57 | 0.50 | 0.45 | 0.41  | 0.37  | 0.32  | 0.28  | 0.24  | 0.20  | 0.17  | 0.10  | 0.03  |
| Poland      | G0308     | 1              | 1.00 | 1.00 | 0.99 | 0.99 | 0.98 | 0.97 | 0.96 | 0.95 | 0.94  | 0.93  | 0.92  | 0.90  | 0.89  | 0.88  | 0.87  | 0.86  | 0.85  |
| Poland      | G0317     | 1              | 1.00 | 1.00 | 1.00 | 0.99 | 0.99 | 0.99 | 0.98 | 0.98 | 0.98  | 0.97  | 0.96  | 0.96  | 0.95  | 0.94  | 0.93  | 0.92  | 0.90  |
| Poland      | G3381     | 1              | 1.00 | 1.00 | 1.00 | 0.99 | 0.99 | 0.98 | 0.97 | 0.96 | 0.95  | 0.94  | 0.92  | 0.91  | 0.90  | 0.89  | 0.88  | 0.87  | 0.85  |
| Poland      | G3382     | 1              | 1.00 | 1.00 | 1.00 | 1.00 | 0.99 | 0.99 | 0.98 | 0.97 | 0.96  | 0.95  | 0.92  | 0.89  | 0.86  | 0.84  | 0.81  | 0.78  | 0.76  |
| Poland      | G3383     | 1              | 1.00 | 1.00 | 1.00 | 0.99 | 0.99 | 0.98 | 0.98 | 0.97 | 0.96  | 0.95  | 0.93  | 0.90  | 0.87  | 0.84  | 0.81  | 0.73  | 0.67  |
| Poland      | G3389     | 1              | 1.00 | 1.00 | 1.00 | 0.99 | 0.99 | 0.98 | 0.97 | 0.97 | 0.96  | 0.95  | 0.93  | 0.91  | 0.88  | 0.85  | 0.83  | 0.78  | 0.74  |

| Country            | GloFAS ID | Station filter | LT1  | LT2  | LT3  | LT4  | LT5  | LT6  | LT7   | LT8   | LT9   | LT10  | LT12  | LT14  | LT16  | LT18  | LT20  | LT25  | L30   |
|--------------------|-----------|----------------|------|------|------|------|------|------|-------|-------|-------|-------|-------|-------|-------|-------|-------|-------|-------|
| Poland             | G3395     | 1              | 1.00 | 1.00 | 1.00 | 1.00 | 0.99 | 0.99 | 0.98  | 0.97  | 0.95  | 0.94  | 0.89  | 0.83  | 0.75  | 0.66  | 0.58  | 0.42  | 0.31  |
| Poland             | G3423     | 1              | 1.00 | 1.00 | 1.00 | 0.99 | 0.99 | 0.98 | 0.96  | 0.95  | 0.93  | 0.90  | 0.83  | 0.74  | 0.65  | 0.56  | 0.48  | 0.34  | 0.25  |
| Poland             | G3430     | 1              | 1.00 | 1.00 | 0.99 | 0.98 | 0.97 | 0.97 | 0.95  | 0.94  | 0.93  | 0.91  | 0.88  | 0.85  | 0.82  | 0.79  | 0.76  | 0.71  | 0.66  |
| Poland             | G3447     | 1              | 1.00 | 0.99 | 0.98 | 0.95 | 0.92 | 0.89 | 0.86  | 0.82  | 0.80  | 0.77  | 0.74  | 0.71  | 0.68  | 0.66  | 0.64  | 0.60  | 0.57  |
| Poland             | G3455     | 1              | 1.00 | 1.00 | 1.00 | 0.99 | 0.98 | 0.96 | 0.95  | 0.92  | 0.88  | 0.84  | 0.73  | 0.62  | 0.52  | 0.44  | 0.37  | 0.26  | 0.18  |
| Poland             | G3499     | 1              | 1.00 | 1.00 | 0.98 | 0.97 | 0.94 | 0.89 | 0.83  | 0.76  | 0.69  | 0.61  | 0.46  | 0.33  | 0.23  | 0.15  | 0.10  | -0.02 | -0.10 |
| Poland             | G3500     | 1              | 1.00 | 1.00 | 0.99 | 0.97 | 0.95 | 0.92 | 0.89  | 0.85  | 0.81  | 0.77  | 0.71  | 0.67  | 0.62  | 0.59  | 0.57  | 0.51  | 0.48  |
| Poland             | G3535     | 1              | 1.00 | 0.98 | 0.95 | 0.91 | 0.85 | 0.79 | 0.72  | 0.65  | 0.58  | 0.52  | 0.40  | 0.32  | 0.25  | 0.20  | 0.16  | 0.08  | 0.02  |
| Portugal           | G0672     | 1              | 0.99 | 0.95 | 0.90 | 0.85 | 0.81 | 0.77 | 0.73  | 0.69  | 0.66  | 0.63  | 0.56  | 0.50  | 0.45  | 0.41  | 0.38  | 0.33  | 0.30  |
| Portugal           | G0737     | 1              | 0.99 | 0.97 | 0.95 | 0.94 | 0.92 | 0.89 | 0.88  | 0.86  | 0.84  | 0.82  | 0.78  | 0.74  | 0.71  | 0.68  | 0.66  | 0.61  | 0.57  |
| Portugal           | G0779     | 1              | 1.00 | 0.99 | 0.97 | 0.95 | 0.94 | 0.92 | 0.91  | 0.90  | 0.90  | 0.89  | 0.86  | 0.84  | 0.83  | 0.82  | 0.80  | 0.78  | 0.75  |
| Romania            | G0488     | 1              | 0.99 | 0.92 | 0.79 | 0.66 | 0.57 | 0.50 | 0.46  | 0.42  | 0.39  | 0.38  | 0.35  | 0.33  | 0.30  | 0.25  | 0.22  | 0.19  | 0.20  |
| Romania            | G0529     | 1              | 1.00 | 0.99 | 0.97 | 0.91 | 0.83 | 0.72 | 0.61  | 0.50  | 0.40  | 0.31  | 0.14  | 0.01  | -0.06 | -0.12 | -0.13 | -0.07 | -0.01 |
| Romania            | G0553     | 1              | 0.93 | 0.83 | 0.70 | 0.59 | 0.51 | 0.44 | 0.39  | 0.34  | 0.30  | 0.27  | 0.21  | 0.17  | 0.14  | 0.08  | 0.04  | 0.03  | 0.02  |
| Romania            | G0559     | 1              | 0.89 | 0.74 | 0.60 | 0.49 | 0.42 | 0.36 | 0.32  | 0.29  | 0.26  | 0.24  | 0.20  | 0.19  | 0.17  | 0.07  | 0.04  | 0.04  | 0.05  |
| Romania            | G0578     | 1              | 0.99 | 0.96 | 0.92 | 0.87 | 0.81 | 0.74 | 0.67  | 0.58  | 0.50  | 0.42  | 0.29  | 0.19  | 0.13  | 0.09  | 0.06  | 0.06  | 0.08  |
| Romania            | G0585     | 1              | 0.89 | 0.77 | 0.65 | 0.58 | 0.52 | 0.47 | 0.42  | 0.39  | 0.36  | 0.32  | 0.28  | 0.24  | 0.25  | 0.25  | 0.24  | 0.22  | 0.19  |
| Romania            | G0591     | 1              | 1.00 | 0.98 | 0.96 | 0.94 | 0.92 | 0.91 | 0.89  | 0.87  | 0.86  | 0.84  | 0.81  | 0.77  | 0.73  | 0.66  | 0.59  | 0.39  | 0.23  |
| Romania            | G0608     | 1              | 1.00 | 1.00 | 1.00 | 0.99 | 0.99 | 0.99 | 0.99  | 0.98  | 0.97  | 0.95  | 0.90  | 0.83  | 0.74  | 0.63  | 0.52  | 0.30  | 0.17  |
| Romania            | G0612     | 1              | 1.00 | 0.99 | 0.99 | 0.99 | 0.99 | 0.98 | 0.98  | 0.98  | 0.97  | 0.96  | 0.93  | 0.89  | 0.83  | 0.74  | 0.64  | 0.40  | 0.24  |
| Romania            | G0615     | 1              | 0.99 | 0.97 | 0.95 | 0.93 | 0.91 | 0.90 | 0.89  | 0.87  | 0.86  | 0.84  | 0.82  | 0.78  | 0.74  | 0.67  | 0.60  | 0.38  | 0.22  |
| Romania            | G0639     | 1              | 0.99 | 0.97 | 0.96 | 0.94 | 0.93 | 0.92 | 0.91  | 0.90  | 0.89  | 0.88  | 0.85  | 0.81  | 0.76  | 0.69  | 0.60  | 0.37  | 0.21  |
| Romania            | G1835     | 1              | 0.99 | 0.98 | 0.96 | 0.94 | 0.93 | 0.92 | 0.91  | 0.90  | 0.90  | 0.88  | 0.87  | 0.85  | 0.85  | 0.82  | 0.82  | 0.79  | 0.79  |
| Romania            | G3789     | 1              | 0.99 | 0.98 | 0.97 | 0.94 | 0.93 | 0.92 | 0.91  | 0.89  | 0.89  | 0.89  | 0.86  | 0.85  | 0.83  | 0.82  | 0.81  | 0.79  | 0.77  |
| Romania            | G3833     | 1              | 0.93 | 0.78 | 0.65 | 0.55 | 0.46 | 0.41 | 0.37  | 0.32  | 0.28  | 0.24  | 0.18  | 0.15  | 0.13  | 0.12  | 0.12  | 0.08  | 0.06  |
| Romania            | G3834     | 1              | 0.99 | 0.97 | 0.95 | 0.93 | 0.92 | 0.91 | 0.89  | 0.88  | 0.87  | 0.85  | 0.83  | 0.79  | 0.74  | 0.68  | 0.60  | 0.38  | 0.21  |
| Romania            | G3858     | 1              | 0.95 | 0.85 | 0.75 | 0.66 | 0.60 | 0.54 | 0.49  | 0.45  | 0.41  | 0.37  | 0.32  | 0.27  | 0.24  | 0.23  | 0.22  | 0.19  | 0.15  |
| Russian Federation | G0019     | 1              | 1.00 | 1.00 | 0.99 | 0.98 | 0.98 | 0.97 | 0.96  | 0.96  | 0.95  | 0.94  | 0.93  | 0.91  | 0.89  | 0.87  | 0.85  | 0.82  | 0.79  |
| Russian Federation | G0028     | 1              | 1.00 | 1.00 | 1.00 | 1.00 | 1.00 | 1.00 | 1.00  | 0.99  | 0.99  | 0.99  | 0.98  | 0.98  | 0.97  | 0.96  | 0.96  | 0.93  | 0.91  |
| Russian Federation | G0039     | 1              | 1.00 | 0.96 | 0.87 | 0.77 | 0.68 | 0.60 | 0.55  | 0.51  | 0.48  | 0.46  | 0.43  | 0.41  | 0.40  | 0.40  | 0.39  | 0.35  | 0.30  |
| Russian Federation | G0044     | 1              | 1.00 | 0.99 | 0.99 | 0.98 | 0.96 | 0.94 | 0.89  | 0.83  | 0.78  | 0.72  | 0.63  | 0.57  | 0.52  | 0.48  | 0.47  | 0.43  | 0.40  |
| Russian Federation | G0055     | 1              | 1.00 | 0.99 | 0.97 | 0.94 | 0.90 | 0.86 | 0.81  | 0.76  | 0.71  | 0.67  | 0.59  | 0.53  | 0.48  | 0.43  | 0.39  | 0.31  | 0.25  |
| Russian Federation | G0063     | 1              | 1.00 | 1.00 | 1.00 | 1.00 | 1.00 | 1.00 | 1.00  | 1.00  | 0.99  | 0.99  | 0.99  | 0.99  | 0.98  | 0.98  | 0.97  | 0.94  | 0.88  |
| Russian Federation | G0070     | 1              | 1.00 | 0.93 | 0.77 | 0.62 | 0.51 | 0.43 | 0.38  | 0.34  | 0.31  | 0.28  | 0.25  | 0.22  | 0.19  | 0.18  | 0.17  | 0.11  | 0.04  |
| Russian Federation | G0073     | 1              | 1.00 | 0.99 | 0.99 | 0.98 | 0.97 | 0.96 | 0.94  | 0.93  | 0.92  | 0.91  | 0.88  | 0.86  | 0.83  | 0.79  | 0.76  | 0.68  | 0.60  |
| Russian Federation | G0079     | 1              | 1.00 | 1.00 | 1.00 | 0.99 | 0.97 | 0.95 | 0.91  | 0.86  | 0.80  | 0.73  | 0.59  | 0.43  | 0.28  | 0.15  | 0.05  | -0.13 | -0.25 |
| Russian Federation | G0088     | 1              | 1.00 | 0.98 | 0.89 | 0.74 | 0.55 | 0.39 | 0.27  | 0.18  | 0.10  | 0.05  | -0.02 | -0.07 | -0.11 | -0.11 | -0.09 | -0.11 | -0.17 |
| Russian Federation | G0095     | 1              | 1.00 | 0.90 | 0.67 | 0.44 | 0.25 | 0.10 | -0.02 | -0.12 | -0.21 | -0.27 | -0.37 | -0.45 | -0.51 | -0.50 | -0.49 | -0.56 | -0.65 |
| Russian Federation | G0144     | 1              | 0.99 | 0.99 | 0.98 | 0.96 | 0.95 | 0.94 | 0.92  | 0.91  | 0.90  | 0.89  | 0.86  | 0.84  | 0.81  | 0.79  | 0.76  | 0.71  | 0.65  |



| Country            | GloFAS ID | Station filter | LT1  | LT2  | LT3  | LT4  | LT5  | LT6  | LT7  | LT8  | LT9  | LT10 | LT12 | LT14 | LT16 | LT18 | LT20 | LT25  | L30   |
|--------------------|-----------|----------------|------|------|------|------|------|------|------|------|------|------|------|------|------|------|------|-------|-------|
| Russian Federation | G0164     | 1              | 1.00 | 1.00 | 0.99 | 0.99 | 0.99 | 0.98 | 0.98 | 0.97 | 0.96 | 0.95 | 0.94 | 0.92 | 0.91 | 0.89 | 0.88 | 0.84  | 0.81  |
| Russian Federation | G0198     | 1              | 1.00 | 1.00 | 0.99 | 0.99 | 0.99 | 0.98 | 0.98 | 0.97 | 0.96 | 0.96 | 0.95 | 0.94 | 0.93 | 0.92 | 0.91 | 0.88  | 0.86  |
| Russian Federation | G0251     | 1              | 1.00 | 0.98 | 0.97 | 0.95 | 0.93 | 0.91 | 0.90 | 0.88 | 0.87 | 0.85 | 0.82 | 0.80 | 0.78 | 0.76 | 0.74 | 0.71  | 0.68  |
| Russian Federation | G0270     | 1              | 0.99 | 0.97 | 0.95 | 0.93 | 0.92 | 0.90 | 0.89 | 0.87 | 0.86 | 0.85 | 0.83 | 0.80 | 0.78 | 0.77 | 0.75 | 0.72  | 0.69  |
| Russian Federation | G0342     | 1              | 1.00 | 1.00 | 0.99 | 0.99 | 0.99 | 0.97 | 0.96 | 0.95 | 0.92 | 0.90 | 0.87 | 0.83 | 0.79 | 0.75 | 0.72 | 0.66  | 0.63  |
| Russian Federation | G0406     | 1              | 1.00 | 1.00 | 1.00 | 1.00 | 1.00 | 1.00 | 0.99 | 0.99 | 0.99 | 0.99 | 0.99 | 0.98 | 0.98 | 0.97 | 0.96 | 0.94  | 0.92  |
| Russian Federation | G0441     | 1              | 1.00 | 1.00 | 1.00 | 1.00 | 0.99 | 0.99 | 0.99 | 0.99 | 0.99 | 0.98 | 0.97 | 0.96 | 0.95 | 0.94 | 0.93 | 0.90  | 0.87  |
| Russian Federation | G0504     | 1              | 1.00 | 1.00 | 1.00 | 1.00 | 1.00 | 1.00 | 1.00 | 1.00 | 1.00 | 1.00 | 0.99 | 0.99 | 0.99 | 0.98 | 0.98 | 0.97  | 0.96  |
| Russian Federation | G0592     | 1              | 1.00 | 1.00 | 1.00 | 0.99 | 0.99 | 0.99 | 0.98 | 0.97 | 0.95 | 0.94 | 0.89 | 0.82 | 0.75 | 0.67 | 0.59 | 0.43  | 0.32  |
| Russian Federation | G0594     | 1              | 1.00 | 0.99 | 0.99 | 0.99 | 0.98 | 0.97 | 0.96 | 0.94 | 0.92 | 0.90 | 0.83 | 0.76 | 0.69 | 0.61 | 0.53 | 0.38  | 0.29  |
| Russian Federation | G1562     | 1              | 1.00 | 0.99 | 0.99 | 0.97 | 0.94 | 0.91 | 0.88 | 0.85 | 0.81 | 0.78 | 0.72 | 0.67 | 0.62 | 0.58 | 0.53 | 0.43  | 0.32  |
| Russian Federation | G1563     | 1              | 1.00 | 0.99 | 0.99 | 0.98 | 0.97 | 0.96 | 0.94 | 0.93 | 0.92 | 0.90 | 0.88 | 0.85 | 0.82 | 0.79 | 0.76 | 0.67  | 0.59  |
| Russian Federation | G1564     | 1              | 0.99 | 0.97 | 0.93 | 0.89 | 0.84 | 0.80 | 0.76 | 0.73 | 0.69 | 0.66 | 0.60 | 0.54 | 0.49 | 0.46 | 0.42 | 0.36  | 0.31  |
| Russian Federation | G1565     | 1              | 1.00 | 0.90 | 0.76 | 0.65 | 0.56 | 0.50 | 0.44 | 0.40 | 0.37 | 0.35 | 0.31 | 0.29 | 0.26 | 0.25 | 0.24 | 0.18  | 0.12  |
| Russian Federation | G1566     | 1              | 1.00 | 1.00 | 1.00 | 0.99 | 0.97 | 0.95 | 0.91 | 0.86 | 0.80 | 0.73 | 0.59 | 0.43 | 0.28 | 0.15 | 0.05 | -0.13 | -0.25 |
| Russian Federation | G1567     | 1              | 1.00 | 0.99 | 0.97 | 0.94 | 0.90 | 0.86 | 0.81 | 0.76 | 0.71 | 0.67 | 0.59 | 0.53 | 0.48 | 0.43 | 0.39 | 0.31  | 0.25  |
| Russian Federation | G1568     | 1              | 1.00 | 1.00 | 1.00 | 0.99 | 0.98 | 0.96 | 0.94 | 0.92 | 0.89 | 0.86 | 0.80 | 0.74 | 0.68 | 0.63 | 0.58 | 0.45  | 0.33  |
| Russian Federation | G1569     | 1              | 0.94 | 0.82 | 0.66 | 0.53 | 0.45 | 0.40 | 0.34 | 0.31 | 0.30 | 0.29 | 0.27 | 0.27 | 0.26 | 0.40 | 0.43 | 0.43  | 0.39  |
| Russian Federation | G2164     | 1              | 0.98 | 0.92 | 0.84 | 0.79 | 0.75 | 0.70 | 0.68 | 0.66 | 0.64 | 0.61 | 0.60 | 0.58 | 0.55 | 0.51 | 0.49 | 0.44  | 0.38  |
| Russian Federation | G2168     | 1              | 1.00 | 1.00 | 0.99 | 0.97 | 0.95 | 0.92 | 0.89 | 0.86 | 0.82 | 0.78 | 0.71 | 0.65 | 0.62 | 0.60 | 0.58 | 0.58  | 0.56  |
| Russian Federation | G2223     | 1              | 1.00 | 1.00 | 1.00 | 1.00 | 1.00 | 0.99 | 0.99 | 0.99 | 0.99 | 0.99 | 0.98 | 0.98 | 0.97 | 0.96 | 0.94 | 0.92  | 0.90  |
| Russian Federation | G2251     | 1              | 1.00 | 0.99 | 0.95 | 0.87 | 0.78 | 0.71 | 0.67 | 0.64 | 0.62 | 0.60 | 0.58 | 0.58 | 0.58 | 0.55 | 0.52 | 0.45  | 0.39  |
| Russian Federation | G2255     | 1              | 1.00 | 0.99 | 0.97 | 0.93 | 0.88 | 0.82 | 0.77 | 0.72 | 0.67 | 0.64 | 0.59 | 0.57 | 0.56 | 0.55 | 0.52 | 0.40  | 0.30  |
| Russian Federation | G2270     | 1              | 1.00 | 1.00 | 1.00 | 1.00 | 1.00 | 0.99 | 0.99 | 0.99 | 0.99 | 0.99 | 0.98 | 0.97 | 0.97 | 0.96 | 0.96 | 0.94  | 0.91  |
| Russian Federation | G2281     | 1              | 1.00 | 1.00 | 1.00 | 0.99 | 0.99 | 0.98 | 0.98 | 0.98 | 0.97 | 0.96 | 0.93 | 0.89 | 0.85 | 0.81 | 0.77 | 0.69  | 0.57  |
| Russian Federation | G2295     | 1              | 1.00 | 1.00 | 1.00 | 0.99 | 0.98 | 0.96 | 0.92 | 0.88 | 0.83 | 0.77 | 0.66 | 0.56 | 0.47 | 0.39 | 0.31 | 0.17  | 0.17  |
| Russian Federation | G2311     | 1              | 1.00 | 1.00 | 1.00 | 1.00 | 1.00 | 1.00 | 0.99 | 0.99 | 0.99 | 0.99 | 0.99 | 0.98 | 0.98 | 0.97 | 0.97 | 0.95  | 0.92  |
| Russian Federation | G2312     | 1              | 1.00 | 1.00 | 0.98 | 0.94 | 0.88 | 0.81 | 0.74 | 0.69 | 0.65 | 0.61 | 0.57 | 0.56 | 0.56 | 0.51 | 0.43 | 0.24  | 0.13  |
| Russian Federation | G2323     | 1              | 1.00 | 1.00 | 1.00 | 0.99 | 0.98 | 0.96 | 0.94 | 0.91 | 0.89 | 0.87 | 0.82 | 0.77 | 0.73 | 0.68 | 0.63 | 0.54  | 0.45  |
| Russian Federation | G2324     | 1              | 1.00 | 1.00 | 0.99 | 0.97 | 0.96 | 0.94 | 0.93 | 0.91 | 0.88 | 0.86 | 0.80 | 0.75 | 0.70 | 0.65 | 0.61 | 0.49  | 0.35  |
| Russian Federation | G2325     | 1              | 1.00 | 1.00 | 1.00 | 0.99 | 0.98 | 0.96 | 0.92 | 0.86 | 0.80 | 0.75 | 0.67 | 0.62 | 0.60 | 0.59 | 0.57 | 0.49  | 0.39  |
| Russian Federation | G2338     | 1              | 1.00 | 1.00 | 1.00 | 0.99 | 0.98 | 0.95 | 0.90 | 0.84 | 0.77 | 0.70 | 0.57 | 0.44 | 0.35 | 0.28 | 0.21 | 0.06  | 0.03  |
| Russian Federation | G2339     | 1              | 1.00 | 1.00 | 1.00 | 1.00 | 0.99 | 0.99 | 0.98 | 0.95 | 0.92 | 0.88 | 0.81 | 0.73 | 0.67 | 0.64 | 0.62 | 0.56  | 0.47  |
| Russian Federation | G2347     | 1              | 1.00 | 1.00 | 1.00 | 1.00 | 1.00 | 0.99 | 0.99 | 0.99 | 0.99 | 0.98 | 0.97 | 0.96 | 0.93 | 0.91 | 0.87 | 0.77  | 0.68  |
| Russian Federation | G2348     | 1              | 1.00 | 1.00 | 1.00 | 1.00 | 0.99 | 0.99 | 0.98 | 0.97 | 0.96 | 0.93 | 0.87 | 0.81 | 0.74 | 0.69 | 0.65 | 0.60  | 0.52  |
| Russian Federation | G2370     | 1              | 1.00 | 0.99 | 0.96 | 0.90 | 0.82 | 0.75 | 0.71 | 0.68 | 0.66 | 0.64 | 0.62 | 0.60 | 0.57 | 0.52 | 0.48 | 0.38  | 0.31  |
| Russian Federation | G2378     | 1              | 1.00 | 1.00 | 1.00 | 0.99 | 0.98 | 0.98 | 0.97 | 0.96 | 0.95 | 0.94 | 0.92 | 0.89 | 0.85 | 0.79 | 0.72 | 0.57  | 0.47  |
| Russian Federation | G2390     | 1              | 1.00 | 1.00 | 1.00 | 0.99 | 0.99 | 0.99 | 0.98 | 0.98 | 0.97 | 0.96 | 0.95 | 0.92 | 0.89 | 0.84 | 0.78 | 0.66  | 0.54  |
| Russian Federation | G2391     | 1              | 1.00 | 1.00 | 1.00 | 1.00 | 0.99 | 0.99 | 0.98 | 0.98 | 0.97 | 0.97 | 0.95 | 0.92 | 0.88 | 0.84 | 0.79 | 0.67  | 0.55  |

| Country            | GloFAS ID | Station filter | LT1  | LT2  | LT3  | LT4  | LT5  | LT6   | LT7   | LT8   | LT9   | LT10  | LT12  | LT14  | LT16  | LT18  | LT20  | LT25  | L30   |
|--------------------|-----------|----------------|------|------|------|------|------|-------|-------|-------|-------|-------|-------|-------|-------|-------|-------|-------|-------|
| Russian Federation | G2403     | 1              | 1.00 | 1.00 | 1.00 | 1.00 | 1.00 | 1.00  | 0.99  | 0.99  | 0.99  | 0.98  | 0.97  | 0.96  | 0.94  | 0.92  | 0.90  | 0.84  | 0.77  |
| Russian Federation | G2409     | 1              | 1.00 | 1.00 | 1.00 | 1.00 | 0.99 | 0.99  | 0.99  | 0.99  | 0.98  | 0.97  | 0.95  | 0.92  | 0.88  | 0.84  | 0.79  | 0.68  | 0.58  |
| Russian Federation | G2420     | 1              | 1.00 | 0.99 | 0.99 | 0.97 | 0.95 | 0.93  | 0.89  | 0.86  | 0.82  | 0.77  | 0.68  | 0.60  | 0.54  | 0.48  | 0.43  | 0.32  | 0.25  |
| Russian Federation | G2421     | 1              | 1.00 | 1.00 | 1.00 | 1.00 | 1.00 | 1.00  | 1.00  | 1.00  | 1.00  | 0.99  | 0.99  | 0.99  | 0.98  | 0.98  | 0.97  | 0.95  | 0.91  |
| Russian Federation | G2422     | 1              | 1.00 | 1.00 | 0.99 | 0.98 | 0.96 | 0.94  | 0.92  | 0.90  | 0.88  | 0.86  | 0.82  | 0.78  | 0.74  | 0.69  | 0.65  | 0.56  | 0.49  |
| Russian Federation | G2431     | 1              | 1.00 | 1.00 | 0.99 | 0.97 | 0.90 | 0.79  | 0.67  | 0.56  | 0.48  | 0.42  | 0.34  | 0.29  | 0.25  | 0.22  | 0.20  | 0.15  | 0.08  |
| Russian Federation | G2432     | 1              | 1.00 | 1.00 | 1.00 | 0.99 | 0.98 | 0.97  | 0.95  | 0.93  | 0.91  | 0.88  | 0.84  | 0.80  | 0.76  | 0.73  | 0.69  | 0.62  | 0.56  |
| Russian Federation | G2433     | 1              | 1.00 | 1.00 | 1.00 | 1.00 | 1.00 | 0.99  | 0.99  | 0.99  | 0.98  | 0.98  | 0.97  | 0.95  | 0.93  | 0.91  | 0.89  | 0.82  | 0.75  |
| Russian Federation | G2441     | 1              | 1.00 | 1.00 | 0.99 | 0.98 | 0.97 | 0.95  | 0.94  | 0.92  | 0.89  | 0.87  | 0.81  | 0.75  | 0.70  | 0.65  | 0.60  | 0.51  | 0.45  |
| Russian Federation | G2442     | 1              | 1.00 | 1.00 | 1.00 | 1.00 | 1.00 | 1.00  | 1.00  | 1.00  | 1.00  | 1.00  | 0.99  | 0.99  | 0.99  | 0.98  | 0.98  | 0.96  | 0.91  |
| Russian Federation | G2450     | 1              | 1.00 | 1.00 | 1.00 | 0.99 | 0.98 | 0.97  | 0.96  | 0.94  | 0.92  | 0.90  | 0.86  | 0.82  | 0.78  | 0.74  | 0.71  | 0.63  | 0.56  |
| Russian Federation | G2458     | 1              | 1.00 | 1.00 | 1.00 | 0.99 | 0.99 | 0.98  | 0.96  | 0.95  | 0.93  | 0.91  | 0.87  | 0.84  | 0.79  | 0.75  | 0.71  | 0.62  | 0.54  |
| Russian Federation | G2471     | 1              | 1.00 | 0.99 | 0.99 | 0.98 | 0.97 | 0.97  | 0.96  | 0.96  | 0.95  | 0.94  | 0.93  | 0.92  | 0.91  | 0.89  | 0.87  | 0.81  | 0.73  |
| Russian Federation | G2472     | 1              | 1.00 | 1.00 | 1.00 | 1.00 | 1.00 | 0.99  | 0.99  | 0.99  | 0.98  | 0.98  | 0.96  | 0.94  | 0.92  | 0.90  | 0.88  | 0.81  | 0.73  |
| Russian Federation | G2484     | 1              | 1.00 | 1.00 | 0.99 | 0.99 | 0.98 | 0.96  | 0.93  | 0.91  | 0.87  | 0.84  | 0.77  | 0.71  | 0.65  | 0.60  | 0.55  | 0.44  | 0.33  |
| Russian Federation | G2556     | 1              | 1.00 | 1.00 | 1.00 | 1.00 | 0.99 | 0.99  | 0.98  | 0.98  | 0.97  | 0.97  | 0.96  | 0.94  | 0.92  | 0.91  | 0.88  | 0.80  | 0.70  |
| Russian Federation | G2557     | 1              | 1.00 | 1.00 | 0.99 | 0.96 | 0.93 | 0.89  | 0.85  | 0.82  | 0.79  | 0.76  | 0.71  | 0.66  | 0.61  | 0.57  | 0.53  | 0.43  | 0.37  |
| Russian Federation | G2592     | 1              | 1.00 | 1.00 | 0.98 | 0.96 | 0.92 | 0.88  | 0.82  | 0.76  | 0.67  | 0.58  | 0.39  | 0.23  | 0.10  | 0.00  | -0.08 | -0.24 | -0.36 |
| Russian Federation | G2601     | 1              | 0.99 | 0.99 | 0.98 | 0.97 | 0.96 | 0.95  | 0.93  | 0.92  | 0.90  | 0.88  | 0.84  | 0.80  | 0.75  | 0.70  | 0.65  | 0.54  | 0.42  |
| Russian Federation | G2631     | 1              | 0.99 | 0.81 | 0.58 | 0.41 | 0.29 | 0.20  | 0.14  | 0.08  | 0.04  | 0.02  | -0.03 | -0.06 | -0.08 | 0.06  | 0.11  | 0.10  | 0.05  |
| Russian Federation | G2647     | 1              | 1.00 | 0.97 | 0.87 | 0.71 | 0.53 | 0.38  | 0.26  | 0.17  | 0.10  | 0.05  | -0.02 | -0.06 | -0.10 | -0.10 | -0.08 | -0.11 | -0.17 |
| Russian Federation | G2704     | 1              | 1.00 | 0.98 | 0.89 | 0.73 | 0.54 | 0.39  | 0.28  | 0.19  | 0.13  | 0.08  | 0.01  | -0.03 | -0.06 | -0.07 | -0.05 | -0.08 | -0.13 |
| Russian Federation | G2710     | 1              | 1.00 | 0.89 | 0.64 | 0.41 | 0.23 | 0.10  | 0.00  | -0.08 | -0.14 | -0.19 | -0.25 | -0.30 | -0.32 | -0.32 | -0.32 | -0.34 | -0.39 |
| Russian Federation | G2711     | 1              | 1.00 | 1.00 | 1.00 | 0.99 | 0.99 | 0.98  | 0.97  | 0.96  | 0.95  | 0.94  | 0.90  | 0.86  | 0.82  | 0.78  | 0.74  | 0.64  | 0.56  |
| Russian Federation | G2717     | 1              | 1.00 | 1.00 | 1.00 | 0.99 | 0.98 | 0.97  | 0.96  | 0.94  | 0.92  | 0.90  | 0.86  | 0.81  | 0.76  | 0.72  | 0.68  | 0.59  | 0.51  |
| Russian Federation | G2725     | 1              | 1.00 | 0.92 | 0.72 | 0.53 | 0.35 | 0.20  | 0.06  | -0.05 | -0.15 | -0.23 | -0.36 | -0.46 | -0.55 | -0.61 | -0.66 | -0.77 | -0.89 |
| Russian Federation | G2726     | 1              | 0.99 | 0.84 | 0.60 | 0.43 | 0.30 | 0.22  | 0.16  | 0.12  | 0.08  | 0.06  | 0.01  | -0.01 | -0.05 | 0.03  | 0.06  | 0.03  | -0.03 |
| Russian Federation | G2727     | 1              | 1.00 | 1.00 | 1.00 | 0.99 | 0.99 | 0.99  | 0.98  | 0.98  | 0.97  | 0.96  | 0.93  | 0.90  | 0.86  | 0.82  | 0.77  | 0.68  | 0.59  |
| Russian Federation | G2750     | 1              | 1.00 | 0.93 | 0.79 | 0.67 | 0.58 | 0.51  | 0.45  | 0.41  | 0.38  | 0.35  | 0.32  | 0.29  | 0.26  | 0.25  | 0.24  | 0.18  | 0.12  |
| Russian Federation | G2764     | 1              | 1.00 | 0.94 | 0.81 | 0.62 | 0.40 | 0.18  | -0.01 | -0.17 | -0.30 | -0.40 | -0.53 | -0.61 | -0.66 | -0.70 | -0.71 | -0.72 | -0.77 |
| Russian Federation | G2765     | 1              | 1.00 | 0.93 | 0.74 | 0.55 | 0.41 | 0.30  | 0.22  | 0.15  | 0.11  | 0.07  | 0.02  | -0.01 | -0.04 | -0.03 | -0.03 | -0.08 | -0.13 |
| Russian Federation | G2776     | 1              | 0.99 | 0.86 | 0.65 | 0.49 | 0.36 | 0.27  | 0.18  | 0.11  | 0.04  | -0.02 | -0.14 | -0.25 | -0.35 | -0.42 | -0.49 | -0.66 | -0.81 |
| Russian Federation | G2777     | 1              | 0.99 | 0.84 | 0.67 | 0.54 | 0.45 | 0.37  | 0.32  | 0.28  | 0.25  | 0.22  | 0.19  | 0.17  | 0.14  | 0.16  | 0.17  | 0.12  | 0.06  |
| Russian Federation | G2778     | 1              | 0.99 | 0.89 | 0.70 | 0.54 | 0.41 | 0.32  | 0.25  | 0.20  | 0.16  | 0.13  | 0.08  | 0.05  | 0.02  | 0.04  | 0.03  | -0.04 | -0.09 |
| Russian Federation | G2795     | 1              | 1.00 | 0.91 | 0.72 | 0.54 | 0.41 | 0.31  | 0.23  | 0.17  | 0.13  | 0.10  | 0.05  | 0.02  | 0.00  | 0.02  | 0.02  | -0.03 | -0.08 |
| Russian Federation | G2796     | 1              | 0.99 | 0.90 | 0.70 | 0.53 | 0.41 | 0.31  | 0.24  | 0.19  | 0.15  | 0.12  | 0.07  | 0.04  | 0.01  | 0.04  | 0.03  | -0.03 | -0.08 |
| Russian Federation | G2804     | 1              | 1.00 | 0.94 | 0.86 | 0.79 | 0.72 | 0.64  | 0.56  | 0.48  | 0.40  | 0.32  | 0.14  | -0.03 | -0.19 | -0.32 | -0.45 | -0.72 | -0.93 |
| Russian Federation | G2805     | 1              | 0.99 | 0.73 | 0.41 | 0.18 | 0.02 | -0.08 | -0.16 | -0.22 | -0.26 | -0.30 | -0.35 | -0.38 | -0.41 | -0.37 | -0.36 | -0.40 | -0.46 |
| Russian Federation | G2806     | 1              | 0.99 | 0.86 | 0.63 | 0.45 | 0.31 | 0.21  | 0.13  | 0.08  | 0.03  | -0.01 | -0.06 | -0.09 | -0.12 | -0.13 | -0.13 | -0.18 | -0.22 |

| Country            | GloFAS ID | Station filter | LT1  | LT2  | LT3  | LT4  | LT5  | LT6  | LT7  | LT8   | LT9   | LT10  | LT12  | LT14  | LT16  | LT18  | LT20  | LT25  | L30   |
|--------------------|-----------|----------------|------|------|------|------|------|------|------|-------|-------|-------|-------|-------|-------|-------|-------|-------|-------|
| Russian Federation | G2807     | 1              | 0.99 | 0.81 | 0.60 | 0.44 | 0.32 | 0.23 | 0.16 | 0.11  | 0.07  | 0.04  | 0.00  | -0.03 | -0.05 | -0.04 | -0.03 | -0.05 | -0.09 |
| Russian Federation | G2816     | 1              | 0.99 | 0.85 | 0.66 | 0.52 | 0.41 | 0.33 | 0.27 | 0.23  | 0.19  | 0.17  | 0.13  | 0.10  | 0.07  | 0.08  | 0.08  | 0.01  | -0.04 |
| Russian Federation | G2823     | 1              | 1.00 | 0.83 | 0.57 | 0.36 | 0.22 | 0.10 | 0.02 | -0.05 | -0.10 | -0.14 | -0.20 | -0.24 | -0.27 | -0.26 | -0.27 | -0.30 | -0.34 |
| Russian Federation | G2824     | 1              | 1.00 | 0.90 | 0.66 | 0.43 | 0.26 | 0.13 | 0.04 | -0.04 | -0.09 | -0.14 | -0.20 | -0.24 | -0.27 | -0.28 | -0.29 | -0.33 | -0.37 |
| Russian Federation | G2825     | 1              | 0.99 | 0.79 | 0.61 | 0.47 | 0.37 | 0.29 | 0.22 | 0.17  | 0.14  | 0.11  | 0.07  | 0.04  | 0.01  | 0.01  | 0.00  | -0.04 | -0.08 |
| Russian Federation | G2832     | 1              | 1.00 | 0.96 | 0.84 | 0.65 | 0.49 | 0.37 | 0.27 | 0.20  | 0.15  | 0.11  | 0.05  | 0.02  | -0.01 | 0.00  | 0.02  | -0.02 | -0.08 |
| Russian Federation | G2837     | 1              | 0.93 | 0.84 | 0.76 | 0.69 | 0.61 | 0.55 | 0.51 | 0.45  | 0.39  | 0.37  | 0.31  | 0.27  | 0.22  | 0.22  | 0.17  | 0.12  | 0.05  |
| Russian Federation | G2838     | 1              | 1.00 | 0.95 | 0.79 | 0.59 | 0.42 | 0.29 | 0.20 | 0.12  | 0.07  | 0.02  | -0.04 | -0.08 | -0.11 | -0.13 | -0.14 | -0.19 | -0.23 |
| Russian Federation | G2855     | 1              | 0.99 | 0.80 | 0.56 | 0.38 | 0.24 | 0.14 | 0.06 | 0.00  | -0.05 | -0.09 | -0.14 | -0.18 | -0.21 | -0.16 | -0.14 | -0.15 | -0.20 |
| Russian Federation | G2856     | 1              | 0.99 | 0.78 | 0.56 | 0.40 | 0.28 | 0.19 | 0.11 | 0.06  | 0.01  | -0.02 | -0.07 | -0.11 | -0.14 | -0.18 | -0.23 | -0.30 | -0.35 |
| Russian Federation | G2876     | 1              | 1.00 | 0.94 | 0.77 | 0.58 | 0.41 | 0.29 | 0.19 | 0.12  | 0.07  | 0.02  | -0.04 | -0.08 | -0.11 | -0.11 | -0.10 | -0.12 | -0.16 |
| Russian Federation | G2882     | 1              | 1.00 | 0.94 | 0.78 | 0.58 | 0.42 | 0.30 | 0.21 | 0.14  | 0.09  | 0.04  | -0.01 | -0.05 | -0.08 | -0.10 | -0.11 | -0.17 | -0.21 |
| Russian Federation | G2889     | 1              | 1.00 | 0.96 | 0.83 | 0.64 | 0.48 | 0.36 | 0.27 | 0.20  | 0.15  | 0.11  | 0.05  | 0.01  | -0.02 | -0.03 | -0.05 | -0.10 | -0.15 |
| Russian Federation | G2893     | 1              | 0.89 | 0.78 | 0.67 | 0.58 | 0.50 | 0.41 | 0.35 | 0.30  | 0.24  | 0.20  | 0.12  | 0.10  | 0.07  | 0.06  | 0.04  | 0.02  | 0.01  |
| Russian Federation | G2894     | 1              | 0.99 | 0.97 | 0.93 | 0.89 | 0.85 | 0.81 | 0.77 | 0.73  | 0.70  | 0.67  | 0.60  | 0.55  | 0.49  | 0.44  | 0.39  | 0.28  | 0.19  |
| Russian Federation | G2895     | 1              | 0.99 | 0.91 | 0.71 | 0.51 | 0.37 | 0.26 | 0.18 | 0.12  | 0.07  | 0.03  | -0.02 | -0.06 | -0.08 | -0.10 | -0.13 | -0.19 | -0.23 |
| Russian Federation | G2896     | 1              | 0.99 | 0.96 | 0.92 | 0.88 | 0.84 | 0.81 | 0.78 | 0.76  | 0.73  | 0.70  | 0.65  | 0.61  | 0.57  | 0.52  | 0.48  | 0.39  | 0.31  |
| Russian Federation | G2904     | 1              | 0.98 | 0.94 | 0.88 | 0.83 | 0.78 | 0.73 | 0.69 | 0.65  | 0.61  | 0.57  | 0.50  | 0.44  | 0.38  | 0.33  | 0.28  | 0.17  | 0.07  |
| Russian Federation | G2905     | 1              | 0.98 | 0.94 | 0.91 | 0.88 | 0.85 | 0.82 | 0.80 | 0.78  | 0.75  | 0.74  | 0.71  | 0.67  | 0.64  | 0.61  | 0.58  | 0.52  | 0.47  |
| Russian Federation | G2912     | 1              | 0.99 | 0.96 | 0.91 | 0.85 | 0.80 | 0.76 | 0.71 | 0.66  | 0.62  | 0.58  | 0.50  | 0.44  | 0.38  | 0.33  | 0.28  | 0.18  | 0.09  |
| Russian Federation | G2913     | 1              | 0.99 | 0.96 | 0.91 | 0.85 | 0.80 | 0.75 | 0.70 | 0.66  | 0.61  | 0.57  | 0.50  | 0.43  | 0.37  | 0.32  | 0.27  | 0.16  | 0.06  |
| Russian Federation | G2921     | 1              | 0.98 | 0.93 | 0.87 | 0.82 | 0.77 | 0.73 | 0.68 | 0.65  | 0.60  | 0.57  | 0.50  | 0.45  | 0.39  | 0.35  | 0.30  | 0.20  | 0.11  |
| Russian Federation | G2928     | 1              | 0.93 | 0.82 | 0.71 | 0.62 | 0.53 | 0.44 | 0.37 | 0.32  | 0.26  | 0.21  | 0.13  | 0.10  | 0.06  | 0.06  | 0.04  | 0.03  | 0.01  |
| Russian Federation | G2933     | 1              | 0.98 | 0.96 | 0.94 | 0.91 | 0.88 | 0.86 | 0.84 | 0.82  | 0.80  | 0.78  | 0.74  | 0.71  | 0.68  | 0.66  | 0.64  | 0.60  | 0.56  |
| Russian Federation | G2934     | 1              | 0.99 | 0.96 | 0.90 | 0.85 | 0.79 | 0.74 | 0.69 | 0.65  | 0.61  | 0.57  | 0.49  | 0.42  | 0.36  | 0.31  | 0.27  | 0.16  | 0.07  |
| Russian Federation | G2935     | 1              | 0.99 | 0.95 | 0.92 | 0.89 | 0.86 | 0.83 | 0.81 | 0.79  | 0.76  | 0.74  | 0.70  | 0.67  | 0.63  | 0.59  | 0.56  | 0.49  | 0.43  |
| Russian Federation | G2940     | 1              | 1.00 | 0.99 | 0.98 | 0.97 | 0.96 | 0.95 | 0.93 | 0.91  | 0.90  | 0.88  | 0.85  | 0.81  | 0.78  | 0.75  | 0.72  | 0.65  | 0.58  |
| Russian Federation | G2953     | 1              | 0.99 | 0.98 | 0.96 | 0.95 | 0.93 | 0.92 | 0.90 | 0.89  | 0.87  | 0.86  | 0.82  | 0.78  | 0.73  | 0.68  | 0.61  | 0.47  | 0.32  |
| Russian Federation | G2963     | 1              | 1.00 | 1.00 | 0.99 | 0.98 | 0.97 | 0.96 | 0.94 | 0.92  | 0.90  | 0.88  | 0.84  | 0.79  | 0.74  | 0.69  | 0.64  | 0.54  | 0.45  |
| Russian Federation | G2977     | 1              | 0.99 | 0.94 | 0.88 | 0.82 | 0.78 | 0.73 | 0.68 | 0.63  | 0.58  | 0.54  | 0.46  | 0.40  | 0.34  | 0.28  | 0.23  | 0.11  | 0.01  |
| Russian Federation | G2984     | 1              | 0.99 | 0.94 | 0.88 | 0.82 | 0.77 | 0.71 | 0.66 | 0.61  | 0.57  | 0.52  | 0.44  | 0.36  | 0.30  | 0.24  | 0.19  | 0.06  | -0.04 |
| Russian Federation | G2992     | 1              | 0.98 | 0.95 | 0.91 | 0.86 | 0.81 | 0.77 | 0.73 | 0.69  | 0.65  | 0.62  | 0.56  | 0.50  | 0.45  | 0.43  | 0.41  | 0.38  | 0.36  |
| Russian Federation | G2993     | 1              | 1.00 | 0.99 | 0.98 | 0.97 | 0.95 | 0.93 | 0.91 | 0.89  | 0.87  | 0.84  | 0.80  | 0.75  | 0.70  | 0.65  | 0.60  | 0.48  | 0.38  |
| Russian Federation | G3007     | 1              | 0.98 | 0.96 | 0.93 | 0.90 | 0.87 | 0.85 | 0.83 | 0.80  | 0.78  | 0.76  | 0.73  | 0.70  | 0.67  | 0.64  | 0.61  | 0.54  | 0.49  |
| Russian Federation | G3015     | 1              | 0.99 | 0.97 | 0.95 | 0.92 | 0.89 | 0.86 | 0.83 | 0.81  | 0.79  | 0.77  | 0.73  | 0.69  | 0.66  | 0.62  | 0.58  | 0.51  | 0.45  |
| Russian Federation | G3032     | 1              | 0.99 | 0.96 | 0.89 | 0.83 | 0.77 | 0.72 | 0.67 | 0.61  | 0.56  | 0.52  | 0.43  | 0.36  | 0.29  | 0.23  | 0.18  | 0.06  | -0.04 |
| Russian Federation | G3045     | 1              | 0.99 | 0.97 | 0.93 | 0.88 | 0.85 | 0.81 | 0.77 | 0.73  | 0.70  | 0.66  | 0.59  | 0.54  | 0.48  | 0.43  | 0.39  | 0.28  | 0.19  |
| Russian Federation | G3052     | 1              | 0.99 | 0.96 | 0.92 | 0.87 | 0.83 | 0.79 | 0.75 | 0.72  | 0.68  | 0.65  | 0.59  | 0.53  | 0.48  | 0.43  | 0.38  | 0.28  | 0.20  |
| Russian Federation | G3058     | 1              | 1.00 | 0.97 | 0.92 | 0.86 | 0.81 | 0.76 | 0.71 | 0.66  | 0.61  | 0.57  | 0.48  | 0.41  | 0.35  | 0.29  | 0.23  | 0.11  | 0.01  |

| Country            | GloFAS ID | Station filter | LT1  | LT2  | LT3  | LT4  | LT5  | LT6  | LT7  | LT8  | LT9  | LT10 | LT12 | LT14 | LT16 | LT18 | LT20 | LT25 | L30  |
|--------------------|-----------|----------------|------|------|------|------|------|------|------|------|------|------|------|------|------|------|------|------|------|
| Russian Federation | G3073     | 1              | 0.99 | 0.96 | 0.91 | 0.87 | 0.83 | 0.79 | 0.75 | 0.71 | 0.68 | 0.64 | 0.58 | 0.52 | 0.47 | 0.43 | 0.39 | 0.29 | 0.21 |
| Russian Federation | G3074     | 1              | 0.99 | 0.96 | 0.92 | 0.87 | 0.83 | 0.80 | 0.76 | 0.73 | 0.70 | 0.66 | 0.61 | 0.55 | 0.51 | 0.47 | 0.44 | 0.36 | 0.29 |
| Russian Federation | G3079     | 1              | 0.99 | 0.97 | 0.94 | 0.90 | 0.86 | 0.82 | 0.79 | 0.75 | 0.72 | 0.70 | 0.64 | 0.59 | 0.55 | 0.51 | 0.47 | 0.39 | 0.32 |
| Russian Federation | G3080     | 1              | 0.99 | 0.95 | 0.90 | 0.85 | 0.80 | 0.76 | 0.72 | 0.68 | 0.64 | 0.60 | 0.53 | 0.47 | 0.42 | 0.37 | 0.33 | 0.22 | 0.13 |
| Russian Federation | G3082     | 1              | 0.99 | 0.98 | 0.94 | 0.90 | 0.86 | 0.82 | 0.78 | 0.75 | 0.71 | 0.69 | 0.63 | 0.58 | 0.53 | 0.49 | 0.45 | 0.38 | 0.31 |
| Russian Federation | G3086     | 1              | 0.99 | 0.98 | 0.95 | 0.91 | 0.87 | 0.83 | 0.80 | 0.77 | 0.74 | 0.71 | 0.66 | 0.61 | 0.56 | 0.53 | 0.50 | 0.45 | 0.41 |
| Russian Federation | G3087     | 1              | 1.00 | 0.98 | 0.94 | 0.90 | 0.86 | 0.82 | 0.78 | 0.75 | 0.72 | 0.68 | 0.63 | 0.58 | 0.53 | 0.49 | 0.45 | 0.36 | 0.30 |
| Russian Federation | G3092     | 1              | 1.00 | 1.00 | 0.99 | 0.99 | 0.98 | 0.98 | 0.97 | 0.97 | 0.96 | 0.96 | 0.94 | 0.93 | 0.92 | 0.91 | 0.90 | 0.88 | 0.85 |
| Russian Federation | G3093     | 1              | 1.00 | 1.00 | 0.99 | 0.99 | 0.98 | 0.97 | 0.97 | 0.96 | 0.95 | 0.95 | 0.93 | 0.92 | 0.91 | 0.89 | 0.88 | 0.85 | 0.83 |
| Russian Federation | G3097     | 1              | 1.00 | 0.98 | 0.94 | 0.88 | 0.83 | 0.78 | 0.73 | 0.68 | 0.64 | 0.59 | 0.51 | 0.44 | 0.38 | 0.32 | 0.26 | 0.14 | 0.04 |
| Russian Federation | G3104     | 1              | 0.98 | 0.93 | 0.85 | 0.80 | 0.75 | 0.70 | 0.65 | 0.62 | 0.58 | 0.55 | 0.48 | 0.42 | 0.36 | 0.30 | 0.25 | 0.15 | 0.05 |
| Russian Federation | G3140     | 1              | 0.99 | 0.96 | 0.92 | 0.88 | 0.84 | 0.81 | 0.78 | 0.75 | 0.72 | 0.69 | 0.64 | 0.59 | 0.55 | 0.51 | 0.47 | 0.39 | 0.33 |
| Russian Federation | G3141     | 1              | 1.00 | 0.98 | 0.94 | 0.89 | 0.83 | 0.78 | 0.73 | 0.68 | 0.64 | 0.59 | 0.51 | 0.44 | 0.37 | 0.31 | 0.26 | 0.13 | 0.03 |
| Russian Federation | G3142     | 1              | 0.99 | 0.96 | 0.92 | 0.89 | 0.86 | 0.83 | 0.80 | 0.78 | 0.75 | 0.73 | 0.69 | 0.65 | 0.61 | 0.58 | 0.55 | 0.49 | 0.44 |
| Russian Federation | G3150     | 1              | 1.00 | 0.99 | 0.98 | 0.96 | 0.93 | 0.90 | 0.87 | 0.85 | 0.82 | 0.79 | 0.73 | 0.68 | 0.63 | 0.59 | 0.56 | 0.48 | 0.42 |
| Russian Federation | G3169     | 1              | 1.00 | 0.98 | 0.94 | 0.89 | 0.85 | 0.81 | 0.77 | 0.73 | 0.70 | 0.66 | 0.60 | 0.55 | 0.50 | 0.45 | 0.41 | 0.32 | 0.25 |
| Russian Federation | G3175     | 1              | 1.00 | 1.00 | 1.00 | 0.99 | 0.99 | 0.98 | 0.97 | 0.97 | 0.96 | 0.95 | 0.94 | 0.92 | 0.90 | 0.89 | 0.87 | 0.83 | 0.79 |
| Russian Federation | G3178     | 1              | 0.99 | 0.97 | 0.94 | 0.91 | 0.89 | 0.86 | 0.84 | 0.82 | 0.79 | 0.77 | 0.74 | 0.71 | 0.68 | 0.66 | 0.63 | 0.58 | 0.54 |
| Russian Federation | G3179     | 1              | 1.00 | 0.99 | 0.97 | 0.96 | 0.94 | 0.92 | 0.90 | 0.89 | 0.87 | 0.85 | 0.82 | 0.79 | 0.77 | 0.75 | 0.73 | 0.70 | 0.67 |
| Russian Federation | G3180     | 1              | 1.00 | 1.00 | 0.99 | 0.99 | 0.99 | 0.99 | 0.99 | 0.98 | 0.98 | 0.98 | 0.97 | 0.96 | 0.95 | 0.94 | 0.92 | 0.89 | 0.84 |
| Russian Federation | G3185     | 1              | 0.99 | 0.97 | 0.95 | 0.92 | 0.90 | 0.88 | 0.86 | 0.84 | 0.82 | 0.80 | 0.77 | 0.74 | 0.72 | 0.70 | 0.69 | 0.66 | 0.64 |
| Russian Federation | G3186     | 1              | 1.00 | 0.98 | 0.96 | 0.93 | 0.91 | 0.88 | 0.86 | 0.84 | 0.82 | 0.80 | 0.77 | 0.73 | 0.71 | 0.69 | 0.67 | 0.63 | 0.60 |
| Russian Federation | G3187     | 1              | 1.00 | 1.00 | 0.99 | 0.98 | 0.97 | 0.96 | 0.94 | 0.93 | 0.92 | 0.91 | 0.89 | 0.86 | 0.84 | 0.83 | 0.81 | 0.77 | 0.74 |
| Russian Federation | G3193     | 1              | 1.00 | 0.99 | 0.97 | 0.96 | 0.94 | 0.92 | 0.90 | 0.89 | 0.88 | 0.86 | 0.83 | 0.80 | 0.78 | 0.76 | 0.74 | 0.71 | 0.68 |
| Russian Federation | G3194     | 1              | 1.00 | 0.99 | 0.99 | 0.98 | 0.97 | 0.95 | 0.94 | 0.93 | 0.92 | 0.91 | 0.88 | 0.86 | 0.84 | 0.83 | 0.81 | 0.78 | 0.74 |
| Russian Federation | G3195     | 1              | 1.00 | 0.98 | 0.94 | 0.91 | 0.89 | 0.86 | 0.83 | 0.82 | 0.80 | 0.77 | 0.74 | 0.71 | 0.69 | 0.65 | 0.63 | 0.59 | 0.57 |
| Russian Federation | G3196     | 1              | 0.98 | 0.94 | 0.91 | 0.87 | 0.84 | 0.82 | 0.79 | 0.76 | 0.74 | 0.72 | 0.68 | 0.65 | 0.62 | 0.60 | 0.57 | 0.52 | 0.48 |
| Russian Federation | G3202     | 1              | 1.00 | 1.00 | 0.99 | 0.99 | 0.99 | 0.98 | 0.98 | 0.98 | 0.98 | 0.97 | 0.96 | 0.95 | 0.94 | 0.93 | 0.92 | 0.88 | 0.83 |
| Russian Federation | G3204     | 1              | 1.00 | 1.00 | 0.99 | 0.99 | 0.98 | 0.98 | 0.97 | 0.96 | 0.95 | 0.94 | 0.92 | 0.90 | 0.88 | 0.86 | 0.84 | 0.79 | 0.75 |
| Russian Federation | G3205     | 1              | 1.00 | 0.99 | 0.97 | 0.95 | 0.94 | 0.92 | 0.91 | 0.89 | 0.88 | 0.87 | 0.84 | 0.82 | 0.79 | 0.77 | 0.75 | 0.72 | 0.68 |
| Russian Federation | G3209     | 1              | 1.00 | 0.97 | 0.88 | 0.77 | 0.67 | 0.59 | 0.54 | 0.51 | 0.48 | 0.46 | 0.44 | 0.43 | 0.41 | 0.41 | 0.40 | 0.38 | 0.34 |
| Russian Federation | G3210     | 1              | 1.00 | 0.98 | 0.92 | 0.84 | 0.75 | 0.69 | 0.64 | 0.60 | 0.58 | 0.56 | 0.54 | 0.53 | 0.51 | 0.49 | 0.47 | 0.43 | 0.39 |
| Russian Federation | G3211     | 1              | 0.98 | 0.92 | 0.86 | 0.81 | 0.77 | 0.72 | 0.69 | 0.69 | 0.67 | 0.65 | 0.62 | 0.57 | 0.55 | 0.50 | 0.46 | 0.37 | 0.32 |
| Russian Federation | G3212     | 1              | 0.98 | 0.95 | 0.92 | 0.88 | 0.86 | 0.84 | 0.82 | 0.80 | 0.79 | 0.77 | 0.73 | 0.69 | 0.67 | 0.64 | 0.63 | 0.58 | 0.54 |
| Russian Federation | G3213     | 1              | 0.99 | 0.97 | 0.93 | 0.90 | 0.87 | 0.84 | 0.82 | 0.79 | 0.77 | 0.74 | 0.70 | 0.66 | 0.63 | 0.60 | 0.58 | 0.52 | 0.47 |
| Russian Federation | G3218     | 1              | 1.00 | 0.98 | 0.95 | 0.91 | 0.86 | 0.81 | 0.77 | 0.72 | 0.68 | 0.64 | 0.56 | 0.49 | 0.43 | 0.37 | 0.32 | 0.21 | 0.11 |
| Russian Federation | G3219     | 1              | 0.98 | 0.95 | 0.91 | 0.89 | 0.87 | 0.85 | 0.83 | 0.81 | 0.80 | 0.79 | 0.76 | 0.73 | 0.72 | 0.70 | 0.67 | 0.63 | 0.60 |
| Russian Federation | G3226     | 1              | 1.00 | 0.99 | 0.97 | 0.95 | 0.93 | 0.91 | 0.90 | 0.89 | 0.87 | 0.86 | 0.82 | 0.80 | 0.78 | 0.76 | 0.74 | 0.71 | 0.68 |
| Russian Federation | G3227     | 1              | 0.99 | 0.96 | 0.93 | 0.91 | 0.89 | 0.87 | 0.86 | 0.84 | 0.83 | 0.81 | 0.79 | 0.76 | 0.74 | 0.72 | 0.70 | 0.67 | 0.64 |

| Country            | GloFAS ID | Station filter | LT1  | LT2  | LT3  | LT4  | LT5  | LT6  | LT7  | LT8  | LT9  | LT10 | LT12 | LT14 | LT16 | LT18 | LT20 | LT25 | L30  |
|--------------------|-----------|----------------|------|------|------|------|------|------|------|------|------|------|------|------|------|------|------|------|------|
| Russian Federation | G3228     | 1              | 0.99 | 0.94 | 0.89 | 0.86 | 0.84 | 0.80 | 0.77 | 0.75 | 0.73 | 0.71 | 0.65 | 0.61 | 0.58 | 0.54 | 0.50 | 0.43 | 0.39 |
| Russian Federation | G3229     | 1              | 0.99 | 0.97 | 0.93 | 0.91 | 0.88 | 0.85 | 0.83 | 0.81 | 0.79 | 0.77 | 0.73 | 0.70 | 0.68 | 0.65 | 0.63 | 0.60 | 0.57 |
| Russian Federation | G3230     | 1              | 1.00 | 1.00 | 1.00 | 0.99 | 0.99 | 0.99 | 0.99 | 0.99 | 0.98 | 0.98 | 0.97 | 0.96 | 0.96 | 0.95 | 0.94 | 0.91 | 0.89 |
| Russian Federation | G3231     | 1              | 1.00 | 0.98 | 0.97 | 0.95 | 0.93 | 0.92 | 0.90 | 0.89 | 0.88 | 0.86 | 0.84 | 0.81 | 0.79 | 0.77 | 0.76 | 0.72 | 0.68 |
| Russian Federation | G3251     | 1              | 1.00 | 0.98 | 0.96 | 0.94 | 0.91 | 0.89 | 0.88 | 0.86 | 0.84 | 0.82 | 0.79 | 0.77 | 0.74 | 0.72 | 0.70 | 0.66 | 0.62 |
| Russian Federation | G3257     | 1              | 1.00 | 0.99 | 0.96 | 0.95 | 0.93 | 0.91 | 0.89 | 0.88 | 0.86 | 0.84 | 0.82 | 0.79 | 0.77 | 0.75 | 0.73 | 0.69 | 0.66 |
| Russian Federation | G3268     | 1              | 0.98 | 0.93 | 0.89 | 0.87 | 0.83 | 0.81 | 0.79 | 0.77 | 0.74 | 0.73 | 0.69 | 0.67 | 0.63 | 0.61 | 0.59 | 0.56 | 0.52 |
| Russian Federation | G3275     | 1              | 0.99 | 0.97 | 0.93 | 0.91 | 0.88 | 0.85 | 0.84 | 0.82 | 0.80 | 0.77 | 0.74 | 0.71 | 0.68 | 0.66 | 0.64 | 0.61 | 0.59 |
| Russian Federation | G3280     | 1              | 0.99 | 0.97 | 0.95 | 0.92 | 0.89 | 0.87 | 0.85 | 0.83 | 0.81 | 0.80 | 0.76 | 0.74 | 0.71 | 0.69 | 0.66 | 0.64 | 0.60 |
| Russian Federation | G3281     | 1              | 0.97 | 0.91 | 0.86 | 0.84 | 0.82 | 0.79 | 0.78 | 0.75 | 0.73 | 0.71 | 0.68 | 0.63 | 0.59 | 0.56 | 0.53 | 0.51 | 0.45 |
| Russian Federation | G3282     | 1              | 0.98 | 0.95 | 0.92 | 0.89 | 0.87 | 0.85 | 0.83 | 0.81 | 0.80 | 0.79 | 0.76 | 0.75 | 0.73 | 0.71 | 0.70 | 0.68 | 0.65 |
| Russian Federation | G3286     | 1              | 0.99 | 0.98 | 0.96 | 0.93 | 0.91 | 0.90 | 0.88 | 0.87 | 0.85 | 0.83 | 0.81 | 0.78 | 0.76 | 0.74 | 0.72 | 0.68 | 0.64 |
| Russian Federation | G3287     | 1              | 0.96 | 0.92 | 0.87 | 0.84 | 0.81 | 0.79 | 0.77 | 0.75 | 0.74 | 0.72 | 0.70 | 0.67 | 0.66 | 0.64 | 0.62 | 0.59 | 0.57 |
| Russian Federation | G3290     | 1              | 0.98 | 0.96 | 0.94 | 0.91 | 0.88 | 0.86 | 0.85 | 0.83 | 0.81 | 0.81 | 0.78 | 0.76 | 0.73 | 0.72 | 0.69 | 0.68 | 0.64 |
| Russian Federation | G3291     | 1              | 0.99 | 0.97 | 0.95 | 0.92 | 0.89 | 0.87 | 0.85 | 0.83 | 0.81 | 0.79 | 0.75 | 0.72 | 0.70 | 0.67 | 0.65 | 0.62 | 0.59 |
| Russian Federation | G3296     | 1              | 0.99 | 0.97 | 0.94 | 0.93 | 0.91 | 0.89 | 0.88 | 0.86 | 0.84 | 0.83 | 0.80 | 0.78 | 0.76 | 0.74 | 0.72 | 0.69 | 0.66 |
| Russian Federation | G3297     | 1              | 1.00 | 0.99 | 0.97 | 0.95 | 0.93 | 0.91 | 0.90 | 0.88 | 0.87 | 0.85 | 0.82 | 0.79 | 0.77 | 0.75 | 0.72 | 0.69 | 0.65 |
| Russian Federation | G3298     | 1              | 0.98 | 0.96 | 0.93 | 0.90 | 0.89 | 0.87 | 0.85 | 0.83 | 0.82 | 0.80 | 0.77 | 0.75 | 0.72 | 0.71 | 0.69 | 0.66 | 0.62 |
| Russian Federation | G3302     | 1              | 0.99 | 0.97 | 0.95 | 0.93 | 0.91 | 0.90 | 0.88 | 0.87 | 0.85 | 0.84 | 0.82 | 0.80 | 0.78 | 0.76 | 0.75 | 0.71 | 0.69 |
| Russian Federation | G3303     | 1              | 0.99 | 0.96 | 0.94 | 0.92 | 0.89 | 0.87 | 0.86 | 0.85 | 0.83 | 0.81 | 0.78 | 0.76 | 0.73 | 0.71 | 0.69 | 0.66 | 0.63 |
| Russian Federation | G3304     | 1              | 0.98 | 0.94 | 0.91 | 0.89 | 0.86 | 0.84 | 0.83 | 0.81 | 0.79 | 0.78 | 0.75 | 0.73 | 0.71 | 0.69 | 0.67 | 0.65 | 0.62 |
| Russian Federation | G3316     | 1              | 0.99 | 0.96 | 0.93 | 0.91 | 0.89 | 0.87 | 0.86 | 0.85 | 0.82 | 0.80 | 0.78 | 0.76 | 0.73 | 0.71 | 0.70 | 0.66 | 0.63 |
| Russian Federation | G3317     | 1              | 0.99 | 0.95 | 0.93 | 0.91 | 0.89 | 0.87 | 0.86 | 0.84 | 0.82 | 0.80 | 0.76 | 0.74 | 0.71 | 0.69 | 0.67 | 0.63 | 0.60 |
| Russian Federation | G3318     | 1              | 1.00 | 0.99 | 0.99 | 0.98 | 0.97 | 0.96 | 0.95 | 0.93 | 0.92 | 0.91 | 0.88 | 0.86 | 0.84 | 0.81 | 0.79 | 0.74 | 0.69 |
| Russian Federation | G3343     | 1              | 1.00 | 0.99 | 0.99 | 0.98 | 0.97 | 0.96 | 0.95 | 0.93 | 0.92 | 0.91 | 0.89 | 0.86 | 0.84 | 0.82 | 0.79 | 0.74 | 0.69 |
| Russian Federation | G3344     | 1              | 0.96 | 0.91 | 0.86 | 0.83 | 0.80 | 0.77 | 0.76 | 0.74 | 0.73 | 0.71 | 0.69 | 0.66 | 0.65 | 0.62 | 0.60 | 0.57 | 0.55 |
| Russian Federation | G3356     | 1              | 0.96 | 0.89 | 0.84 | 0.81 | 0.80 | 0.77 | 0.75 | 0.74 | 0.72 | 0.70 | 0.67 | 0.65 | 0.65 | 0.63 | 0.62 | 0.59 | 0.58 |
| Russian Federation | G3358     | 1              | 0.97 | 0.90 | 0.84 | 0.81 | 0.79 | 0.77 | 0.75 | 0.74 | 0.72 | 0.69 | 0.65 | 0.64 | 0.64 | 0.63 | 0.62 | 0.59 | 0.57 |
| Russian Federation | G3359     | 1              | 0.97 | 0.90 | 0.84 | 0.80 | 0.77 | 0.75 | 0.74 | 0.71 | 0.68 | 0.65 | 0.59 | 0.58 | 0.57 | 0.56 | 0.55 | 0.51 | 0.48 |
| Russian Federation | G3373     | 1              | 1.00 | 1.00 | 1.00 | 0.99 | 0.99 | 0.99 | 0.98 | 0.97 | 0.97 | 0.96 | 0.94 | 0.91 | 0.89 | 0.87 | 0.84 | 0.81 | 0.78 |
| Russian Federation | G3374     | 1              | 1.00 | 1.00 | 1.00 | 0.99 | 0.99 | 0.97 | 0.96 | 0.94 | 0.93 | 0.91 | 0.88 | 0.84 | 0.81 | 0.79 | 0.77 | 0.73 | 0.71 |
| Russian Federation | G3407     | 1              | 0.92 | 0.84 | 0.76 | 0.74 | 0.73 | 0.71 | 0.69 | 0.69 | 0.67 | 0.63 | 0.63 | 0.62 | 0.63 | 0.61 | 0.60 | 0.59 | 0.55 |
| Russian Federation | G3418     | 1              | 0.90 | 0.81 | 0.76 | 0.71 | 0.64 | 0.65 | 0.63 | 0.61 | 0.61 | 0.59 | 0.55 | 0.55 | 0.54 | 0.56 | 0.51 | 0.53 | 0.48 |
| Russian Federation | G3424     | 1              | 0.92 | 0.86 | 0.81 | 0.77 | 0.74 | 0.70 | 0.69 | 0.68 | 0.66 | 0.66 | 0.64 | 0.61 | 0.60 | 0.57 | 0.56 | 0.55 | 0.52 |
| Russian Federation | G3425     | 1              | 0.94 | 0.86 | 0.78 | 0.74 | 0.71 | 0.66 | 0.64 | 0.64 | 0.62 | 0.60 | 0.58 | 0.56 | 0.56 | 0.56 | 0.53 | 0.55 | 0.49 |
| Russian Federation | G3426     | 1              | 1.00 | 0.98 | 0.95 | 0.93 | 0.91 | 0.86 | 0.82 | 0.77 | 0.73 | 0.69 | 0.65 | 0.59 | 0.54 | 0.51 | 0.49 | 0.41 | 0.36 |
| Russian Federation | G3431     | 1              | 1.00 | 1.00 | 1.00 | 1.00 | 0.99 | 0.99 | 0.99 | 0.98 | 0.98 | 0.97 | 0.96 | 0.95 | 0.93 | 0.92 | 0.90 | 0.86 | 0.82 |
| Russian Federation | G3441     | 1              | 1.00 | 1.00 | 1.00 | 1.00 | 1.00 | 0.99 | 0.99 | 0.99 | 0.99 | 0.99 | 0.98 | 0.97 | 0.97 | 0.96 | 0.95 | 0.91 | 0.87 |
| Russian Federation | G3452     | 1              | 1.00 | 1.00 | 0.99 | 0.99 | 0.99 | 0.98 | 0.98 | 0.97 | 0.97 | 0.96 | 0.95 | 0.94 | 0.93 | 0.92 | 0.91 | 0.88 | 0.85 |

| Country            | GloFAS ID | Station filter | LT1  | LT2  | LT3  | LT4  | LT5   | LT6   | LT7   | LT8   | LT9   | LT10  | LT12  | LT14  | LT16  | LT18  | LT20  | LT25  | L30   |
|--------------------|-----------|----------------|------|------|------|------|-------|-------|-------|-------|-------|-------|-------|-------|-------|-------|-------|-------|-------|
| Russian Federation | G3453     | 1              | 1.00 | 1.00 | 1.00 | 0.99 | 0.98  | 0.96  | 0.95  | 0.93  | 0.91  | 0.88  | 0.84  | 0.81  | 0.78  | 0.75  | 0.72  | 0.68  | 0.65  |
| Russian Federation | G3457     | 1              | 1.00 | 1.00 | 0.99 | 0.99 | 0.98  | 0.98  | 0.97  | 0.96  | 0.95  | 0.95  | 0.93  | 0.91  | 0.89  | 0.86  | 0.84  | 0.78  | 0.73  |
| Russian Federation | G3464     | 1              | 1.00 | 1.00 | 0.99 | 0.99 | 0.99  | 0.98  | 0.98  | 0.97  | 0.96  | 0.96  | 0.94  | 0.93  | 0.92  | 0.91  | 0.90  | 0.87  | 0.84  |
| Russian Federation | G3472     | 1              | 1.00 | 1.00 | 1.00 | 1.00 | 0.99  | 0.99  | 0.99  | 0.98  | 0.97  | 0.97  | 0.95  | 0.93  | 0.92  | 0.90  | 0.88  | 0.83  | 0.78  |
| Russian Federation | G3473     | 1              | 1.00 | 1.00 | 0.98 | 0.96 | 0.94  | 0.92  | 0.90  | 0.89  | 0.88  | 0.86  | 0.83  | 0.81  | 0.80  | 0.78  | 0.77  | 0.74  | 0.72  |
| Russian Federation | G3474     | 1              | 1.00 | 0.98 | 0.91 | 0.84 | 0.77  | 0.70  | 0.65  | 0.62  | 0.60  | 0.55  | 0.49  | 0.45  | 0.45  | 0.42  | 0.40  | 0.37  | 0.36  |
| Russian Federation | G3480     | 1              | 1.00 | 1.00 | 1.00 | 1.00 | 0.99  | 0.99  | 0.99  | 0.98  | 0.98  | 0.97  | 0.96  | 0.95  | 0.93  | 0.91  | 0.89  | 0.84  | 0.79  |
| Russian Federation | G3481     | 1              | 1.00 | 0.96 | 0.92 | 0.86 | 0.79  | 0.74  | 0.72  | 0.69  | 0.63  | 0.59  | 0.53  | 0.52  | 0.50  | 0.48  | 0.46  | 0.46  | 0.41  |
| Russian Federation | G3485     | 1              | 1.00 | 0.99 | 0.99 | 0.97 | 0.95  | 0.91  | 0.86  | 0.83  | 0.77  | 0.73  | 0.69  | 0.62  | 0.57  | 0.54  | 0.53  | 0.47  | 0.43  |
| Russian Federation | G3494     | 1              | 1.00 | 1.00 | 1.00 | 1.00 | 0.99  | 0.99  | 0.99  | 0.98  | 0.98  | 0.97  | 0.94  | 0.91  | 0.89  | 0.86  | 0.84  | 0.80  | 0.77  |
| Russian Federation | G3496     | 1              | 1.00 | 1.00 | 0.99 | 0.98 | 0.98  | 0.96  | 0.94  | 0.93  | 0.92  | 0.90  | 0.87  | 0.83  | 0.81  | 0.77  | 0.75  | 0.70  | 0.66  |
| Russian Federation | G3501     | 1              | 1.00 | 1.00 | 1.00 | 1.00 | 1.00  | 1.00  | 1.00  | 0.99  | 0.99  | 0.99  | 0.98  | 0.97  | 0.97  | 0.96  | 0.95  | 0.93  | 0.91  |
| Russian Federation | G3502     | 1              | 1.00 | 1.00 | 1.00 | 1.00 | 0.99  | 0.99  | 0.99  | 0.99  | 0.98  | 0.97  | 0.96  | 0.94  | 0.91  | 0.89  | 0.86  | 0.82  | 0.78  |
| Russian Federation | G3513     | 1              | 1.00 | 1.00 | 1.00 | 1.00 | 1.00  | 0.99  | 0.98  | 0.97  | 0.96  | 0.95  | 0.92  | 0.89  | 0.86  | 0.83  | 0.81  | 0.74  | 0.70  |
| Russian Federation | G3525     | 1              | 1.00 | 1.00 | 1.00 | 1.00 | 1.00  | 1.00  | 0.99  | 0.99  | 0.99  | 0.98  | 0.97  | 0.96  | 0.95  | 0.94  | 0.92  | 0.87  | 0.83  |
| Russian Federation | G3526     | 1              | 0.93 | 0.86 | 0.82 | 0.78 | 0.71  | 0.69  | 0.67  | 0.64  | 0.59  | 0.61  | 0.50  | 0.50  | 0.47  | 0.50  | 0.48  | 0.48  | 0.44  |
| Russian Federation | G3563     | 1              | 1.00 | 1.00 | 1.00 | 1.00 | 1.00  | 1.00  | 0.99  | 0.99  | 0.99  | 0.99  | 0.98  | 0.97  | 0.96  | 0.95  | 0.94  | 0.90  | 0.86  |
| Russian Federation | G3564     | 1              | 1.00 | 1.00 | 1.00 | 1.00 | 1.00  | 0.99  | 0.99  | 0.99  | 0.98  | 0.98  | 0.97  | 0.96  | 0.95  | 0.94  | 0.93  | 0.90  | 0.86  |
| Russian Federation | G3570     | 1              | 1.00 | 1.00 | 1.00 | 1.00 | 1.00  | 1.00  | 1.00  | 1.00  | 1.00  | 1.00  | 0.99  | 0.99  | 0.99  | 0.99  | 0.98  | 0.97  | 0.96  |
| Russian Federation | G3571     | 1              | 1.00 | 1.00 | 1.00 | 1.00 | 1.00  | 1.00  | 1.00  | 1.00  | 1.00  | 1.00  | 0.99  | 0.99  | 0.98  | 0.98  | 0.97  | 0.96  | 0.94  |
| Russian Federation | G3590     | 1              | 1.00 | 0.99 | 0.97 | 0.95 | 0.93  | 0.90  | 0.87  | 0.85  | 0.83  | 0.81  | 0.76  | 0.71  | 0.67  | 0.63  | 0.59  | 0.54  | 0.51  |
| Russian Federation | G3601     | 1              | 1.00 | 1.00 | 1.00 | 1.00 | 1.00  | 1.00  | 1.00  | 1.00  | 1.00  | 1.00  | 1.00  | 0.99  | 0.99  | 0.99  | 0.99  | 0.98  | 0.96  |
| Russian Federation | G3644     | 1              | 1.00 | 0.99 | 0.99 | 0.97 | 0.96  | 0.96  | 0.95  | 0.94  | 0.93  | 0.93  | 0.91  | 0.89  | 0.86  | 0.85  | 0.83  | 0.79  | 0.75  |
| Russian Federation | G3650     | 1              | 1.00 | 1.00 | 1.00 | 1.00 | 1.00  | 1.00  | 1.00  | 1.00  | 1.00  | 0.99  | 0.99  | 0.99  | 0.99  | 0.98  | 0.98  | 0.97  | 0.96  |
| Russian Federation | G3660     | 1              | 1.00 | 1.00 | 1.00 | 1.00 | 0.99  | 0.99  | 0.99  | 0.99  | 0.98  | 0.97  | 0.96  | 0.94  | 0.92  | 0.91  | 0.89  | 0.86  | 0.83  |
| Russian Federation | G3684     | 1              | 1.00 | 1.00 | 1.00 | 1.00 | 1.00  | 1.00  | 1.00  | 1.00  | 0.99  | 0.99  | 0.99  | 0.99  | 0.99  | 0.98  | 0.98  | 0.97  | 0.96  |
| Russian Federation | G3703     | 1              | 1.00 | 1.00 | 0.99 | 0.99 | 0.98  | 0.98  | 0.97  | 0.97  | 0.96  | 0.96  | 0.95  | 0.95  | 0.95  | 0.94  | 0.94  | 0.92  | 0.91  |
| Russian Federation | G3738     | 1              | 1.00 | 0.99 | 0.99 | 0.99 | 0.98  | 0.98  | 0.98  | 0.97  | 0.97  | 0.96  | 0.95  | 0.94  | 0.93  | 0.93  | 0.92  | 0.90  | 0.89  |
| Russian Federation | G3742     | 1              | 1.00 | 1.00 | 1.00 | 0.99 | 0.99  | 0.98  | 0.97  | 0.96  | 0.94  | 0.93  | 0.89  | 0.86  | 0.83  | 0.81  | 0.79  | 0.73  | 0.69  |
| Russian Federation | G3752     | 1              | 1.00 | 1.00 | 1.00 | 1.00 | 1.00  | 1.00  | 1.00  | 1.00  | 1.00  | 1.00  | 1.00  | 0.99  | 0.99  | 0.99  | 0.99  | 0.97  | 0.94  |
| Russian Federation | G3760     | 1              | 1.00 | 1.00 | 1.00 | 1.00 | 1.00  | 1.00  | 1.00  | 1.00  | 0.99  | 0.99  | 0.99  | 0.98  | 0.98  | 0.93  | 0.89  | 0.77  | 0.68  |
| Russian Federation | G3765     | 1              | 1.00 | 1.00 | 1.00 | 0.99 | 0.99  | 0.99  | 0.99  | 0.98  | 0.97  | 0.94  | 0.89  | 0.84  | 0.83  | 0.78  | 0.75  | 0.67  | 0.60  |
| Russian Federation | G3773     | 1              | 1.00 | 1.00 | 0.99 | 0.99 | 0.98  | 0.97  | 0.96  | 0.95  | 0.93  | 0.91  | 0.86  | 0.83  | 0.79  | 0.75  | 0.71  | 0.63  | 0.56  |
| Russian Federation | G3774     | 1              | 1.00 | 0.99 | 0.99 | 0.99 | 0.99  | 0.98  | 0.98  | 0.97  | 0.97  | 0.96  | 0.91  | 0.86  | 0.82  | 0.79  | 0.76  | 0.68  | 0.61  |
| Russian Federation | G3815     | 1              | 1.00 | 1.00 | 1.00 | 0.99 | 0.98  | 0.94  | 0.88  | 0.79  | 0.70  | 0.61  | 0.45  | 0.32  | 0.22  | 0.15  | 0.10  | 0.03  | 0.02  |
| Russian Federation | G3818     | 1              | 1.00 | 0.99 | 0.96 | 0.89 | 0.79  | 0.68  | 0.59  | 0.52  | 0.45  | 0.39  | 0.32  | 0.25  | 0.18  | 0.13  | 0.14  | 0.11  | 0.09  |
| Russian Federation | G3837     | 1              | 1.00 | 1.00 | 0.99 | 0.99 | 0.99  | 0.98  | 0.96  | 0.92  | 0.88  | 0.83  | 0.70  | 0.54  | 0.37  | 0.21  | 0.06  | -0.25 | -0.39 |
| Russian Federation | G3869     | 1              | 1.00 | 0.95 | 0.76 | 0.54 | 0.34  | 0.18  | 0.08  | 0.00  | -0.07 | -0.10 | -0.16 | -0.23 | -0.31 | -0.31 | -0.22 | -0.20 | -0.24 |
| Russian Federation | G3874     | 1              | 0.82 | 0.45 | 0.20 | 0.02 | -0.09 | -0.18 | -0.25 | -0.28 | -0.28 | -0.31 | -0.35 | -0.43 | -0.42 | -0.33 | -0.30 | -0.31 | -0.32 |

| Country  | GloFAS ID | Station filter | LT1  | LT2  | LT3  | LT4  | LT5  | LT6  | LT7  | LT8  | LT9  | LT10 | LT12 | LT14 | LT16 | LT18  | LT20  | LT25  | L30   |
|----------|-----------|----------------|------|------|------|------|------|------|------|------|------|------|------|------|------|-------|-------|-------|-------|
| Serbia   | G0562     | 1              | 1.00 | 0.99 | 0.97 | 0.94 | 0.90 | 0.85 | 0.81 | 0.77 | 0.72 | 0.67 | 0.58 | 0.49 | 0.42 | 0.35  | 0.28  | 0.18  | 0.13  |
| Serbia   | G0566     | 1              | 1.00 | 1.00 | 0.99 | 0.98 | 0.96 | 0.94 | 0.90 | 0.86 | 0.82 | 0.76 | 0.64 | 0.53 | 0.45 | 0.40  | 0.36  | 0.30  | 0.28  |
| Serbia   | G0579     | 1              | 1.00 | 0.99 | 0.97 | 0.95 | 0.93 | 0.90 | 0.87 | 0.83 | 0.79 | 0.74 | 0.64 | 0.54 | 0.46 | 0.40  | 0.36  | 0.30  | 0.27  |
| Serbia   | G0599     | 1              | 1.00 | 1.00 | 0.99 | 0.99 | 0.98 | 0.97 | 0.95 | 0.91 | 0.87 | 0.81 | 0.67 | 0.51 | 0.35 | 0.21  | 0.09  | -0.12 | -0.21 |
| Serbia   | G0617     | 1              | 1.00 | 1.00 | 1.00 | 1.00 | 1.00 | 0.99 | 0.99 | 0.98 | 0.97 | 0.95 | 0.90 | 0.83 | 0.74 | 0.63  | 0.52  | 0.30  | 0.17  |
| Serbia   | G1764     | 1              | 1.00 | 1.00 | 1.00 | 0.99 | 0.98 | 0.96 | 0.92 | 0.88 | 0.82 | 0.75 | 0.60 | 0.43 | 0.28 | 0.15  | 0.05  | -0.14 | -0.20 |
| Serbia   | G1765     | 1              | 1.00 | 1.00 | 0.99 | 0.97 | 0.93 | 0.89 | 0.83 | 0.76 | 0.68 | 0.60 | 0.44 | 0.29 | 0.16 | 0.06  | -0.04 | -0.17 | -0.20 |
| Serbia   | G3814     | 1              | 1.00 | 1.00 | 1.00 | 1.00 | 0.99 | 0.98 | 0.97 | 0.95 | 0.92 | 0.89 | 0.80 | 0.71 | 0.62 | 0.53  | 0.46  | 0.29  | 0.18  |
| Serbia   | G3817     | 1              | 1.00 | 1.00 | 1.00 | 1.00 | 0.99 | 0.99 | 0.97 | 0.95 | 0.93 | 0.91 | 0.84 | 0.76 | 0.66 | 0.57  | 0.49  | 0.36  | 0.30  |
| Serbia   | G3824     | 1              | 1.00 | 1.00 | 1.00 | 0.99 | 0.98 | 0.98 | 0.97 | 0.96 | 0.94 | 0.93 | 0.89 | 0.84 | 0.78 | 0.72  | 0.65  | 0.47  | 0.32  |
| Serbia   | G3828     | 1              | 1.00 | 1.00 | 1.00 | 1.00 | 1.00 | 0.99 | 0.98 | 0.97 | 0.95 | 0.93 | 0.86 | 0.77 | 0.66 | 0.55  | 0.45  | 0.25  | 0.15  |
| Serbia   | G3831     | 1              | 1.00 | 0.98 | 0.96 | 0.91 | 0.84 | 0.76 | 0.66 | 0.57 | 0.47 | 0.38 | 0.22 | 0.11 | 0.02 | -0.05 | -0.12 | -0.20 | -0.18 |
| Serbia   | G3862     | 1              | 0.99 | 0.98 | 0.94 | 0.89 | 0.81 | 0.73 | 0.66 | 0.58 | 0.52 | 0.45 | 0.33 | 0.24 | 0.16 | 0.09  | 0.06  | -0.05 | -0.11 |
| Serbia   | G3868     | 1              | 0.99 | 0.96 | 0.91 | 0.83 | 0.75 | 0.67 | 0.59 | 0.51 | 0.44 | 0.38 | 0.27 | 0.18 | 0.11 | 0.07  | 0.05  | -0.02 | -0.05 |
| Slovakia | G0449     | 1              | 0.96 | 0.88 | 0.76 | 0.65 | 0.56 | 0.48 | 0.41 | 0.36 | 0.32 | 0.28 | 0.23 | 0.18 | 0.16 | 0.15  | 0.15  | 0.12  | 0.11  |
| Slovakia | G0460     | 1              | 1.00 | 0.99 | 0.97 | 0.93 | 0.87 | 0.77 | 0.67 | 0.56 | 0.47 | 0.39 | 0.28 | 0.21 | 0.15 | 0.11  | 0.12  | 0.17  | 0.15  |
| Slovakia | G0469     | 1              | 1.00 | 1.00 | 1.00 | 0.99 | 0.99 | 0.98 | 0.95 | 0.91 | 0.86 | 0.79 | 0.62 | 0.46 | 0.34 | 0.25  | 0.19  | 0.09  | 0.03  |
| Slovakia | G0471     | 1              | 0.98 | 0.95 | 0.91 | 0.87 | 0.82 | 0.76 | 0.69 | 0.63 | 0.57 | 0.51 | 0.44 | 0.39 | 0.36 | 0.33  | 0.32  | 0.29  | 0.26  |
| Slovakia | G3649     | 1              | 0.97 | 0.89 | 0.78 | 0.67 | 0.57 | 0.49 | 0.42 | 0.36 | 0.32 | 0.28 | 0.23 | 0.19 | 0.16 | 0.14  | 0.15  | 0.12  | 0.10  |
| Slovenia | G0530     | 1              | 0.93 | 0.76 | 0.63 | 0.55 | 0.48 | 0.41 | 0.36 | 0.32 | 0.28 | 0.24 | 0.20 | 0.17 | 0.15 | 0.16  | 0.16  | 0.14  | 0.14  |
| Slovenia | G0545     | 1              | 1.00 | 1.00 | 0.99 | 0.97 | 0.95 | 0.91 | 0.87 | 0.82 | 0.76 | 0.70 | 0.57 | 0.45 | 0.36 | 0.29  | 0.24  | 0.19  | 0.17  |
| Slovenia | G0564     | 1              | 0.98 | 0.91 | 0.81 | 0.74 | 0.66 | 0.61 | 0.57 | 0.52 | 0.47 | 0.42 | 0.36 | 0.31 | 0.27 | 0.24  | 0.22  | 0.17  | 0.16  |
| Spain    | G1570     | 1              | 1.00 | 0.99 | 0.95 | 0.89 | 0.85 | 0.80 | 0.76 | 0.72 | 0.71 | 0.69 | 0.58 | 0.53 | 0.48 | 0.45  | 0.42  | 0.39  | 0.35  |
| Spain    | G1571     | 1              | 1.00 | 0.99 | 0.97 | 0.95 | 0.94 | 0.92 | 0.89 | 0.87 | 0.85 | 0.82 | 0.78 | 0.74 | 0.70 | 0.66  | 0.64  | 0.57  | 0.51  |
| Spain    | G1572     | 1              | 0.99 | 0.96 | 0.92 | 0.88 | 0.85 | 0.83 | 0.80 | 0.77 | 0.74 | 0.71 | 0.67 | 0.63 | 0.59 | 0.57  | 0.53  | 0.49  | 0.45  |
| Spain    | G1573     | 1              | 1.00 | 0.99 | 0.98 | 0.96 | 0.93 | 0.91 | 0.89 | 0.86 | 0.84 | 0.82 | 0.77 | 0.72 | 0.67 | 0.64  | 0.59  | 0.49  | 0.39  |
| Spain    | G1574     | 1              | 0.99 | 0.92 | 0.84 | 0.79 | 0.72 | 0.67 | 0.67 | 0.67 | 0.68 | 0.66 | 0.65 | 0.60 | 0.59 | 0.58  | 0.58  | 0.55  | 0.53  |
| Spain    | G1575     | 1              | 0.95 | 0.92 | 0.89 | 0.87 | 0.83 | 0.78 | 0.76 | 0.74 | 0.72 | 0.71 | 0.68 | 0.65 | 0.63 | 0.63  | 0.61  | 0.59  | 0.58  |
| Spain    | G1576     | 1              | 1.00 | 0.99 | 0.99 | 0.98 | 0.96 | 0.95 | 0.92 | 0.90 | 0.87 | 0.84 | 0.78 | 0.71 | 0.64 | 0.58  | 0.54  | 0.43  | 0.34  |
| Spain    | G1577     | 1              | 1.00 | 0.99 | 0.98 | 0.96 | 0.94 | 0.91 | 0.88 | 0.85 | 0.82 | 0.80 | 0.75 | 0.71 | 0.67 | 0.64  | 0.61  | 0.57  | 0.53  |
| Spain    | G1578     | 1              | 1.00 | 0.97 | 0.90 | 0.80 | 0.71 | 0.62 | 0.55 | 0.48 | 0.43 | 0.39 | 0.32 | 0.27 | 0.22 | 0.19  | 0.18  | 0.16  | 0.12  |
| Spain    | G1579     | 1              | 1.00 | 1.00 | 1.00 | 0.99 | 0.98 | 0.95 | 0.93 | 0.90 | 0.87 | 0.84 | 0.77 | 0.72 | 0.66 | 0.61  | 0.56  | 0.47  | 0.41  |
| Spain    | G1580     | 1              | 1.00 | 1.00 | 1.00 | 1.00 | 1.00 | 0.99 | 0.99 | 0.99 | 0.98 | 0.97 | 0.94 | 0.91 | 0.87 | 0.83  | 0.79  | 0.68  | 0.60  |
| Spain    | G1581     | 1              | 1.00 | 1.00 | 1.00 | 1.00 | 0.99 | 0.99 | 0.98 | 0.98 | 0.97 | 0.95 | 0.93 | 0.90 | 0.87 | 0.83  | 0.79  | 0.69  | 0.60  |
| Spain    | G1582     | 1              | 1.00 | 1.00 | 0.99 | 0.98 | 0.96 | 0.93 | 0.89 | 0.85 | 0.80 | 0.75 | 0.66 | 0.57 | 0.49 | 0.42  | 0.37  | 0.33  | 0.33  |
| Spain    | G1583     | 1              | 1.00 | 0.99 | 0.98 | 0.96 | 0.92 | 0.88 | 0.83 | 0.78 | 0.73 | 0.68 | 0.59 | 0.51 | 0.43 | 0.38  | 0.36  | 0.34  | 0.33  |
| Spain    | G3894     | 1              | 1.00 | 1.00 | 0.98 | 0.96 | 0.93 | 0.89 | 0.83 | 0.77 | 0.71 | 0.65 | 0.52 | 0.41 | 0.30 | 0.22  | 0.17  | 0.13  | 0.12  |
| Spain    | G3903     | 1              | 1.00 | 0.98 | 0.94 | 0.86 | 0.79 | 0.74 | 0.68 | 0.61 | 0.55 | 0.52 | 0.43 | 0.39 | 0.33 | 0.27  | 0.25  | 0.18  | 0.13  |
| Spain    | G3906     | 1              | 1.00 | 1.00 | 0.99 | 0.99 | 0.97 | 0.96 | 0.95 | 0.94 | 0.92 | 0.90 | 0.87 | 0.85 | 0.82 | 0.80  | 0.78  | 0.75  | 0.71  |



| Country     | GloFAS ID | Station filter | LT1  | LT2  | LT3  | LT4  | LT5  | LT6  | LT7  | LT8  | LT9  | LT10 | LT12 | LT14 | LT16 | LT18  | LT20  | LT25  | L30   |
|-------------|-----------|----------------|------|------|------|------|------|------|------|------|------|------|------|------|------|-------|-------|-------|-------|
| Spain       | G3913     | 1              | 1.00 | 1.00 | 0.99 | 0.98 | 0.98 | 0.97 | 0.97 | 0.96 | 0.95 | 0.94 | 0.92 | 0.89 | 0.87 | 0.84  | 0.81  | 0.74  | 0.69  |
| Sweden      | G0038     | 1              | 1.00 | 1.00 | 0.99 | 0.99 | 0.98 | 0.98 | 0.97 | 0.96 | 0.95 | 0.94 | 0.91 | 0.89 | 0.85 | 0.81  | 0.75  | 0.61  | 0.49  |
| Sweden      | G0049     | 1              | 0.99 | 0.89 | 0.73 | 0.61 | 0.53 | 0.48 | 0.44 | 0.41 | 0.39 | 0.37 | 0.35 | 0.34 | 0.32 | 0.32  | 0.32  | 0.29  | 0.27  |
| Sweden      | G0052     | 1              | 1.00 | 0.99 | 0.99 | 0.99 | 0.98 | 0.98 | 0.97 | 0.97 | 0.97 | 0.96 | 0.96 | 0.95 | 0.93 | 0.92  | 0.91  | 0.86  | 0.78  |
| Sweden      | G0056     | 1              | 1.00 | 1.00 | 1.00 | 1.00 | 1.00 | 1.00 | 0.99 | 0.99 | 0.99 | 0.99 | 0.98 | 0.97 | 0.96 | 0.95  | 0.92  | 0.84  | 0.76  |
| Sweden      | G0061     | 1              | 0.99 | 0.87 | 0.69 | 0.57 | 0.48 | 0.42 | 0.38 | 0.35 | 0.32 | 0.30 | 0.26 | 0.22 | 0.18 | 0.12  | 0.09  | 0.03  | -0.01 |
| Sweden      | G0078     | 1              | 0.99 | 0.98 | 0.95 | 0.92 | 0.90 | 0.87 | 0.85 | 0.83 | 0.81 | 0.79 | 0.76 | 0.72 | 0.69 | 0.67  | 0.64  | 0.59  | 0.54  |
| Sweden      | G0094     | 1              | 0.99 | 0.94 | 0.84 | 0.74 | 0.66 | 0.59 | 0.53 | 0.47 | 0.41 | 0.36 | 0.25 | 0.15 | 0.07 | -0.01 | -0.06 | -0.16 | -0.25 |
| Sweden      | G0096     | 1              | 0.98 | 0.93 | 0.83 | 0.74 | 0.66 | 0.58 | 0.51 | 0.45 | 0.39 | 0.33 | 0.23 | 0.13 | 0.05 | -0.02 | -0.06 | -0.16 | -0.23 |
| Sweden      | G0102     | 1              | 0.99 | 0.98 | 0.94 | 0.88 | 0.81 | 0.74 | 0.67 | 0.60 | 0.53 | 0.47 | 0.35 | 0.24 | 0.15 | 0.07  | -0.01 | -0.16 | -0.27 |
| Sweden      | G0114     | 1              | 1.00 | 1.00 | 1.00 | 0.99 | 0.98 | 0.96 | 0.93 | 0.88 | 0.83 | 0.77 | 0.68 | 0.60 | 0.54 | 0.50  | 0.47  | 0.42  | 0.42  |
| Sweden      | G0117     | 1              | 0.99 | 0.98 | 0.97 | 0.96 | 0.95 | 0.93 | 0.92 | 0.91 | 0.90 | 0.89 | 0.87 | 0.85 | 0.84 | 0.82  | 0.80  | 0.76  | 0.72  |
| Sweden      | G0139     | 1              | 0.99 | 0.93 | 0.80 | 0.69 | 0.62 | 0.57 | 0.54 | 0.51 | 0.50 | 0.48 | 0.46 | 0.45 | 0.44 | 0.44  | 0.44  | 0.40  | 0.36  |
| Sweden      | G0153     | 1              | 1.00 | 1.00 | 1.00 | 0.99 | 0.99 | 0.97 | 0.94 | 0.90 | 0.84 | 0.78 | 0.66 | 0.56 | 0.48 | 0.43  | 0.39  | 0.35  | 0.33  |
| Sweden      | G0175     | 1              | 1.00 | 1.00 | 1.00 | 0.99 | 0.99 | 0.99 | 0.99 | 0.99 | 0.99 | 0.98 | 0.98 | 0.97 | 0.96 | 0.96  | 0.95  | 0.93  | 0.91  |
| Sweden      | G0188     | 1              | 0.99 | 0.98 | 0.94 | 0.88 | 0.84 | 0.80 | 0.77 | 0.75 | 0.74 | 0.73 | 0.71 | 0.70 | 0.69 | 0.69  | 0.68  | 0.67  | 0.64  |
| Sweden      | G0193     | 1              | 1.00 | 0.99 | 0.99 | 0.99 | 0.98 | 0.98 | 0.97 | 0.96 | 0.95 | 0.95 | 0.93 | 0.92 | 0.90 | 0.88  | 0.86  | 0.81  | 0.77  |
| Sweden      | G2241     | 1              | 1.00 | 0.99 | 0.98 | 0.97 | 0.97 | 0.96 | 0.94 | 0.92 | 0.88 | 0.84 | 0.76 | 0.70 | 0.64 | 0.58  | 0.52  | 0.38  | 0.27  |
| Sweden      | G2246     | 1              | 1.00 | 0.99 | 0.98 | 0.97 | 0.96 | 0.96 | 0.95 | 0.94 | 0.93 | 0.92 | 0.89 | 0.84 | 0.77 | 0.70  | 0.64  | 0.51  | 0.39  |
| Sweden      | G2250     | 1              | 1.00 | 0.99 | 0.98 | 0.97 | 0.96 | 0.95 | 0.94 | 0.93 | 0.91 | 0.90 | 0.87 | 0.82 | 0.75 | 0.69  | 0.62  | 0.48  | 0.35  |
| Sweden      | G2253     | 1              | 1.00 | 0.99 | 0.98 | 0.98 | 0.98 | 0.97 | 0.97 | 0.96 | 0.95 | 0.93 | 0.87 | 0.80 | 0.72 | 0.68  | 0.63  | 0.50  | 0.38  |
| Sweden      | G2322     | 1              | 1.00 | 1.00 | 1.00 | 1.00 | 0.99 | 0.99 | 0.99 | 0.99 | 0.98 | 0.98 | 0.98 | 0.97 | 0.97 | 0.96  | 0.95  | 0.93  | 0.90  |
| Sweden      | G2336     | 1              | 1.00 | 1.00 | 1.00 | 1.00 | 1.00 | 0.99 | 0.99 | 0.99 | 0.99 | 0.98 | 0.97 | 0.95 | 0.91 | 0.85  | 0.79  | 0.74  | 0.61  |
| Sweden      | G2448     | 1              | 1.00 | 0.99 | 0.99 | 0.98 | 0.98 | 0.97 | 0.96 | 0.96 | 0.95 | 0.94 | 0.92 | 0.89 | 0.87 | 0.84  | 0.80  | 0.71  | 0.62  |
| Sweden      | G2457     | 1              | 0.97 | 0.88 | 0.78 | 0.70 | 0.63 | 0.56 | 0.49 | 0.43 | 0.37 | 0.31 | 0.21 | 0.10 | 0.00 | -0.06 | -0.10 | -0.22 | -0.32 |
| Sweden      | G2600     | 1              | 0.99 | 0.95 | 0.88 | 0.81 | 0.74 | 0.68 | 0.62 | 0.57 | 0.51 | 0.47 | 0.37 | 0.29 | 0.22 | 0.15  | 0.09  | -0.03 | -0.13 |
| Sweden      | G2619     | 1              | 0.99 | 0.99 | 0.97 | 0.93 | 0.87 | 0.79 | 0.70 | 0.61 | 0.52 | 0.43 | 0.27 | 0.13 | 0.00 | -0.10 | -0.20 | -0.39 | -0.52 |
| Sweden      | G2630     | 1              | 0.99 | 0.97 | 0.91 | 0.84 | 0.76 | 0.69 | 0.63 | 0.57 | 0.52 | 0.46 | 0.37 | 0.28 | 0.20 | 0.13  | 0.06  | -0.08 | -0.20 |
| Sweden      | G2646     | 1              | 0.99 | 0.98 | 0.94 | 0.89 | 0.82 | 0.75 | 0.68 | 0.60 | 0.52 | 0.45 | 0.31 | 0.19 | 0.09 | 0.00  | -0.09 | -0.25 | -0.37 |
| Sweden      | G2881     | 1              | 1.00 | 0.99 | 0.98 | 0.96 | 0.92 | 0.87 | 0.81 | 0.74 | 0.68 | 0.62 | 0.52 | 0.45 | 0.40 | 0.36  | 0.34  | 0.30  | 0.27  |
| Sweden      | G2887     | 1              | 0.99 | 0.96 | 0.86 | 0.71 | 0.58 | 0.47 | 0.41 | 0.36 | 0.33 | 0.31 | 0.29 | 0.29 | 0.29 | 0.30  | 0.31  | 0.31  | 0.30  |
| Switzerland | G0493     | 1              | 1.00 | 0.96 | 0.90 | 0.83 | 0.76 | 0.70 | 0.64 | 0.58 | 0.53 | 0.48 | 0.39 | 0.32 | 0.27 | 0.22  | 0.18  | 0.12  | 0.09  |
| Switzerland | G0499     | 1              | 0.99 | 0.95 | 0.88 | 0.80 | 0.73 | 0.67 | 0.60 | 0.54 | 0.49 | 0.44 | 0.35 | 0.29 | 0.24 | 0.19  | 0.16  | 0.11  | 0.07  |
| Switzerland | G0501     | 1              | 0.97 | 0.92 | 0.85 | 0.78 | 0.73 | 0.67 | 0.62 | 0.57 | 0.53 | 0.49 | 0.42 | 0.36 | 0.32 | 0.29  | 0.26  | 0.21  | 0.17  |
| Switzerland | G0502     | 1              | 0.97 | 0.92 | 0.85 | 0.79 | 0.73 | 0.67 | 0.62 | 0.57 | 0.53 | 0.49 | 0.42 | 0.36 | 0.32 | 0.29  | 0.27  | 0.22  | 0.18  |
| Switzerland | G0503     | 1              | 0.97 | 0.92 | 0.85 | 0.79 | 0.73 | 0.67 | 0.62 | 0.57 | 0.53 | 0.49 | 0.42 | 0.36 | 0.32 | 0.29  | 0.27  | 0.22  | 0.18  |
| Switzerland | G0506     | 1              | 0.96 | 0.88 | 0.79 | 0.71 | 0.65 | 0.59 | 0.54 | 0.50 | 0.47 | 0.43 | 0.38 | 0.34 | 0.31 | 0.29  | 0.28  | 0.23  | 0.19  |
| Switzerland | G0507     | 1              | 0.99 | 0.92 | 0.82 | 0.73 | 0.65 | 0.58 | 0.54 | 0.49 | 0.45 | 0.42 | 0.36 | 0.32 | 0.29 | 0.28  | 0.25  | 0.20  | 0.16  |
| Switzerland | G0514     | 1              | 0.99 | 0.95 | 0.86 | 0.77 | 0.68 | 0.62 | 0.57 | 0.53 | 0.49 | 0.45 | 0.38 | 0.35 | 0.30 | 0.29  | 0.26  | 0.21  | 0.16  |



| Country        | GloFAS ID | Station filter | LT1  | LT2  | LT3  | LT4  | LT5  | LT6  | LT7  | LT8  | LT9  | LT10 | LT12 | LT14 | LT16 | LT18  | LT20  | LT25  | L30   |
|----------------|-----------|----------------|------|------|------|------|------|------|------|------|------|------|------|------|------|-------|-------|-------|-------|
| Turkey         | G0698     | 1              | 1.00 | 0.97 | 0.91 | 0.84 | 0.76 | 0.66 | 0.57 | 0.48 | 0.40 | 0.31 | 0.19 | 0.09 | 0.02 | -0.03 | -0.08 | -0.15 | -0.16 |
| Ukraine        | G0483     | 1              | 1.00 | 1.00 | 1.00 | 1.00 | 1.00 | 1.00 | 1.00 | 1.00 | 0.99 | 0.99 | 0.99 | 0.99 | 0.98 | 0.98  | 0.97  | 0.96  | 0.95  |
| Ukraine        | G0528     | 1              | 1.00 | 1.00 | 1.00 | 1.00 | 1.00 | 0.99 | 0.99 | 0.99 | 0.99 | 0.99 | 0.99 | 0.98 | 0.98 | 0.98  | 0.98  | 0.97  | 0.96  |
| Ukraine        | G3417     | 1              | 1.00 | 1.00 | 0.99 | 0.99 | 0.98 | 0.97 | 0.96 | 0.94 | 0.92 | 0.90 | 0.86 | 0.81 | 0.77 | 0.73  | 0.70  | 0.64  | 0.60  |
| Ukraine        | G3440     | 1              | 1.00 | 0.99 | 0.99 | 0.98 | 0.96 | 0.95 | 0.93 | 0.90 | 0.88 | 0.86 | 0.83 | 0.80 | 0.78 | 0.76  | 0.75  | 0.72  | 0.70  |
| Ukraine        | G3448     | 1              | 1.00 | 1.00 | 1.00 | 0.99 | 0.98 | 0.98 | 0.96 | 0.95 | 0.94 | 0.92 | 0.89 | 0.85 | 0.82 | 0.78  | 0.75  | 0.69  | 0.66  |
| Ukraine        | G3449     | 1              | 1.00 | 1.00 | 1.00 | 0.99 | 0.98 | 0.97 | 0.95 | 0.94 | 0.92 | 0.90 | 0.87 | 0.84 | 0.81 | 0.78  | 0.76  | 0.72  | 0.69  |
| Ukraine        | G3450     | 1              | 1.00 | 1.00 | 0.99 | 0.99 | 0.99 | 0.98 | 0.98 | 0.97 | 0.96 | 0.95 | 0.93 | 0.91 | 0.89 | 0.86  | 0.84  | 0.80  | 0.76  |
| Ukraine        | G3451     | 1              | 1.00 | 1.00 | 1.00 | 0.99 | 0.99 | 0.98 | 0.97 | 0.96 | 0.95 | 0.94 | 0.91 | 0.88 | 0.85 | 0.83  | 0.81  | 0.77  | 0.74  |
| Ukraine        | G3456     | 1              | 1.00 | 1.00 | 0.99 | 0.99 | 0.98 | 0.97 | 0.97 | 0.96 | 0.95 | 0.94 | 0.92 | 0.90 | 0.87 | 0.85  | 0.83  | 0.79  | 0.76  |
| Ukraine        | G3463     | 1              | 1.00 | 1.00 | 0.99 | 0.99 | 0.99 | 0.99 | 0.98 | 0.98 | 0.98 | 0.97 | 0.96 | 0.96 | 0.94 | 0.93  | 0.91  | 0.87  | 0.83  |
| Ukraine        | G3469     | 1              | 1.00 | 0.99 | 0.99 | 0.98 | 0.98 | 0.97 | 0.96 | 0.95 | 0.94 | 0.93 | 0.90 | 0.88 | 0.86 | 0.84  | 0.82  | 0.79  | 0.76  |
| Ukraine        | G3470     | 1              | 1.00 | 0.99 | 0.99 | 0.98 | 0.98 | 0.98 | 0.97 | 0.97 | 0.97 | 0.96 | 0.95 | 0.94 | 0.93 | 0.92  | 0.91  | 0.87  | 0.83  |
| Ukraine        | G3471     | 1              | 1.00 | 1.00 | 0.99 | 0.99 | 0.99 | 0.99 | 0.98 | 0.97 | 0.97 | 0.95 | 0.93 | 0.90 | 0.86 | 0.83  | 0.80  | 0.73  | 0.68  |
| Ukraine        | G3484     | 1              | 1.00 | 1.00 | 0.99 | 0.99 | 0.99 | 0.98 | 0.97 | 0.97 | 0.96 | 0.95 | 0.92 | 0.90 | 0.88 | 0.86  | 0.84  | 0.79  | 0.76  |
| Ukraine        | G3505     | 1              | 1.00 | 1.00 | 1.00 | 0.99 | 0.99 | 0.99 | 0.99 | 0.98 | 0.98 | 0.97 | 0.96 | 0.94 | 0.92 | 0.90  | 0.88  | 0.84  | 0.80  |
| Ukraine        | G3556     | 1              | 1.00 | 1.00 | 1.00 | 1.00 | 1.00 | 1.00 | 1.00 | 0.99 | 0.99 | 0.99 | 0.99 | 0.98 | 0.98 | 0.97  | 0.96  | 0.94  | 0.91  |
| Ukraine        | G3562     | 1              | 1.00 | 1.00 | 0.99 | 0.99 | 0.98 | 0.97 | 0.96 | 0.94 | 0.92 | 0.90 | 0.86 | 0.82 | 0.79 | 0.77  | 0.74  | 0.72  | 0.69  |
| Ukraine        | G3600     | 1              | 1.00 | 1.00 | 1.00 | 0.99 | 0.99 | 0.99 | 0.99 | 0.99 | 0.98 | 0.98 | 0.97 | 0.97 | 0.96 | 0.95  | 0.94  | 0.92  | 0.90  |
| Ukraine        | G3606     | 1              | 1.00 | 1.00 | 1.00 | 1.00 | 0.99 | 0.99 | 0.99 | 0.99 | 0.99 | 0.98 | 0.98 | 0.98 | 0.97 | 0.97  | 0.96  | 0.95  | 0.93  |
| Ukraine        | G3607     | 1              | 1.00 | 0.99 | 0.99 | 0.99 | 0.98 | 0.98 | 0.97 | 0.97 | 0.96 | 0.95 | 0.93 | 0.92 | 0.90 | 0.89  | 0.87  | 0.84  | 0.81  |
| Ukraine        | G3608     | 1              | 1.00 | 1.00 | 1.00 | 1.00 | 1.00 | 1.00 | 1.00 | 0.99 | 0.99 | 0.99 | 0.99 | 0.98 | 0.98 | 0.98  | 0.97  | 0.96  | 0.94  |
| Ukraine        | G3616     | 1              | 1.00 | 1.00 | 0.99 | 0.99 | 0.98 | 0.98 | 0.97 | 0.96 | 0.95 | 0.94 | 0.93 | 0.91 | 0.89 | 0.87  | 0.85  | 0.81  | 0.79  |
| Ukraine        | G3622     | 1              | 1.00 | 1.00 | 1.00 | 1.00 | 0.99 | 0.99 | 0.99 | 0.99 | 0.99 | 0.99 | 0.98 | 0.98 | 0.97 | 0.97  | 0.96  | 0.95  | 0.93  |
| Ukraine        | G3628     | 1              | 1.00 | 1.00 | 1.00 | 1.00 | 0.99 | 0.99 | 0.99 | 0.99 | 0.99 | 0.99 | 0.98 | 0.98 | 0.97 | 0.97  | 0.96  | 0.95  | 0.93  |
| Ukraine        | G3629     | 1              | 1.00 | 0.99 | 0.98 | 0.97 | 0.96 | 0.94 | 0.92 | 0.91 | 0.89 | 0.87 | 0.85 | 0.82 | 0.79 | 0.77  | 0.75  | 0.72  | 0.70  |
| Ukraine        | G3633     | 1              | 1.00 | 1.00 | 1.00 | 1.00 | 1.00 | 1.00 | 1.00 | 1.00 | 1.00 | 1.00 | 0.99 | 0.99 | 0.99 | 0.99  | 0.99  | 0.98  | 0.98  |
| Ukraine        | G3640     | 1              | 0.99 | 0.97 | 0.92 | 0.87 | 0.83 | 0.78 | 0.74 | 0.70 | 0.65 | 0.61 | 0.56 | 0.51 | 0.46 | 0.42  | 0.38  | 0.29  | 0.24  |
| Ukraine        | G3641     | 1              | 1.00 | 1.00 | 1.00 | 1.00 | 1.00 | 1.00 | 1.00 | 0.99 | 0.99 | 0.99 | 0.99 | 0.98 | 0.98 | 0.97  | 0.97  | 0.95  | 0.94  |
| Ukraine        | G3642     | 1              | 0.99 | 0.99 | 0.98 | 0.97 | 0.96 | 0.94 | 0.93 | 0.92 | 0.90 | 0.89 | 0.86 | 0.84 | 0.82 | 0.80  | 0.79  | 0.76  | 0.73  |
| Ukraine        | G3643     | 1              | 1.00 | 0.98 | 0.93 | 0.83 | 0.71 | 0.61 | 0.52 | 0.46 | 0.41 | 0.36 | 0.31 | 0.28 | 0.24 | 0.21  | 0.16  | 0.09  | 0.10  |
| Ukraine        | G3659     | 1              | 1.00 | 0.99 | 0.98 | 0.95 | 0.92 | 0.89 | 0.86 | 0.83 | 0.80 | 0.77 | 0.72 | 0.68 | 0.65 | 0.63  | 0.61  | 0.58  | 0.56  |
| Ukraine        | G3666     | 1              | 1.00 | 1.00 | 1.00 | 0.99 | 0.98 | 0.97 | 0.96 | 0.94 | 0.93 | 0.91 | 0.88 | 0.84 | 0.81 | 0.78  | 0.75  | 0.69  | 0.64  |
| Ukraine        | G3708     | 1              | 1.00 | 1.00 | 1.00 | 0.99 | 0.99 | 0.98 | 0.97 | 0.96 | 0.94 | 0.92 | 0.88 | 0.84 | 0.80 | 0.77  | 0.74  | 0.68  | 0.64  |
| Ukraine        | G3713     | 1              | 1.00 | 0.99 | 0.98 | 0.98 | 0.97 | 0.96 | 0.94 | 0.93 | 0.92 | 0.89 | 0.85 | 0.81 | 0.78 | 0.75  | 0.72  | 0.67  | 0.64  |
| Ukraine        | G3725     | 1              | 1.00 | 1.00 | 0.99 | 0.99 | 0.98 | 0.97 | 0.97 | 0.96 | 0.94 | 0.93 | 0.90 | 0.88 | 0.86 | 0.83  | 0.81  | 0.75  | 0.71  |
| United Kingdom | G1602     | 1              | 1.00 | 0.99 | 0.98 | 0.97 | 0.96 | 0.95 | 0.94 | 0.93 | 0.92 | 0.92 | 0.90 | 0.88 | 0.87 | 0.85  | 0.84  | 0.82  | 0.80  |
| United Kingdom | G1834     | 0              | 0.99 | 0.98 | 0.96 | 0.94 | 0.93 | 0.91 | 0.90 | 0.89 | 0.89 | 0.87 | 0.86 | 0.84 | 0.83 | 0.81  | 0.80  | 0.79  | 0.77  |
| United Kingdom | G3329     | 1              | 1.00 | 0.99 | 0.97 | 0.93 | 0.87 | 0.81 | 0.76 | 0.70 | 0.66 | 0.62 | 0.56 | 0.53 | 0.49 | 0.47  | 0.43  | 0.31  | 0.24  |

| Country        | GloFAS ID | Station filter | LT1  | LT2  | LT3  | LT4  | LT5  | LT6  | LT7  | LT8  | LT9  | LT10 | LT12 | LT14 | LT16 | LT18 | LT20 | LT25 | L30  |
|----------------|-----------|----------------|------|------|------|------|------|------|------|------|------|------|------|------|------|------|------|------|------|
| United Kingdom | G3337     | 1              | 1.00 | 0.99 | 0.97 | 0.94 | 0.91 | 0.87 | 0.83 | 0.80 | 0.77 | 0.73 | 0.68 | 0.64 | 0.60 | 0.57 | 0.55 | 0.51 | 0.47 |

Table 5: GloFAS climatology skill scores for North America.

| Country | GloFAS ID | Station filter | LT1  | LT2  | LT3  | LT4  | LT5  | LT6  | LT7  | LT8  | LT9  | LT10 | LT12 | LT14  | LT16  | LT18  | LT20  | LT25  | L30   |
|---------|-----------|----------------|------|------|------|------|------|------|------|------|------|------|------|-------|-------|-------|-------|-------|-------|
| Canada  | G0017     | 1              | 1.00 | 0.99 | 0.96 | 0.93 | 0.88 | 0.82 | 0.77 | 0.73 | 0.68 | 0.64 | 0.57 | 0.52  | 0.46  | 0.41  | 0.37  | 0.31  | 0.29  |
| Canada  | G0021     | 1              | 1.00 | 0.98 | 0.94 | 0.88 | 0.81 | 0.73 | 0.66 | 0.60 | 0.54 | 0.49 | 0.44 | 0.40  | 0.37  | 0.32  | 0.26  | 0.23  | 0.22  |
| Canada  | G0022     | 1              | 0.91 | 0.76 | 0.67 | 0.60 | 0.52 | 0.48 | 0.44 | 0.42 | 0.38 | 0.35 | 0.37 | 0.31  | 0.29  | 0.27  | 0.24  | 0.27  | 0.22  |
| Canada  | G0025     | 1              | 1.00 | 0.99 | 0.97 | 0.94 | 0.91 | 0.89 | 0.87 | 0.85 | 0.84 | 0.83 | 0.80 | 0.78  | 0.74  | 0.71  | 0.67  | 0.57  | 0.49  |
| Canada  | G0026     | 1              | 0.99 | 0.97 | 0.94 | 0.89 | 0.84 | 0.79 | 0.73 | 0.67 | 0.59 | 0.52 | 0.37 | 0.27  | 0.23  | 0.17  | 0.15  | 0.15  | 0.09  |
| Canada  | G0027     | 1              | 0.93 | 0.78 | 0.65 | 0.58 | 0.54 | 0.49 | 0.46 | 0.45 | 0.43 | 0.41 | 0.39 | 0.35  | 0.34  | 0.30  | 0.28  | 0.26  | 0.26  |
| Canada  | G0029     | 1              | 0.99 | 0.96 | 0.92 | 0.89 | 0.86 | 0.84 | 0.83 | 0.80 | 0.78 | 0.76 | 0.72 | 0.71  | 0.69  | 0.66  | 0.65  | 0.61  | 0.60  |
| Canada  | G0030     | 1              | 0.97 | 0.90 | 0.78 | 0.65 | 0.57 | 0.52 | 0.48 | 0.43 | 0.38 | 0.34 | 0.28 | 0.26  | 0.22  | 0.21  | 0.20  | 0.23  | 0.21  |
| Canada  | G0032     | 1              | 1.00 | 0.98 | 0.94 | 0.91 | 0.86 | 0.80 | 0.75 | 0.69 | 0.64 | 0.59 | 0.53 | 0.49  | 0.47  | 0.44  | 0.42  | 0.37  | 0.33  |
| Canada  | G0033     | 1              | 1.00 | 0.97 | 0.94 | 0.91 | 0.87 | 0.84 | 0.82 | 0.80 | 0.78 | 0.78 | 0.75 | 0.72  | 0.70  | 0.71  | 0.69  | 0.68  | 0.65  |
| Canada  | G0036     | 1              | 1.00 | 1.00 | 0.99 | 0.98 | 0.96 | 0.93 | 0.90 | 0.88 | 0.86 | 0.84 | 0.80 | 0.77  | 0.74  | 0.71  | 0.69  | 0.60  | 0.53  |
| Canada  | G0037     | 1              | 1.00 | 0.99 | 0.97 | 0.94 | 0.91 | 0.89 | 0.87 | 0.85 | 0.84 | 0.83 | 0.80 | 0.78  | 0.74  | 0.71  | 0.67  | 0.57  | 0.49  |
| Canada  | G0042     | 1              | 0.95 | 0.82 | 0.71 | 0.65 | 0.61 | 0.57 | 0.54 | 0.52 | 0.50 | 0.48 | 0.46 | 0.44  | 0.43  | 0.40  | 0.40  | 0.35  | 0.30  |
| Canada  | G0045     | 1              | 0.99 | 0.95 | 0.90 | 0.83 | 0.74 | 0.66 | 0.57 | 0.52 | 0.49 | 0.47 | 0.43 | 0.38  | 0.36  | 0.34  | 0.33  | 0.28  | 0.28  |
| Canada  | G0050     | 1              | 1.00 | 1.00 | 0.99 | 0.98 | 0.97 | 0.96 | 0.95 | 0.93 | 0.92 | 0.90 | 0.86 | 0.82  | 0.77  | 0.73  | 0.70  | 0.61  | 0.54  |
| Canada  | G0051     | 1              | 0.99 | 0.96 | 0.94 | 0.91 | 0.89 | 0.87 | 0.86 | 0.84 | 0.83 | 0.82 | 0.77 | 0.75  | 0.71  | 0.67  | 0.64  | 0.56  | 0.50  |
| Canada  | G0053     | 1              | 1.00 | 0.99 | 0.97 | 0.94 | 0.91 | 0.88 | 0.85 | 0.83 | 0.80 | 0.77 | 0.72 | 0.66  | 0.60  | 0.56  | 0.50  | 0.38  | 0.32  |
| Canada  | G0060     | 1              | 1.00 | 1.00 | 0.99 | 0.99 | 0.99 | 0.99 | 0.98 | 0.98 | 0.98 | 0.97 | 0.96 | 0.94  | 0.92  | 0.90  | 0.87  | 0.81  | 0.76  |
| Canada  | G0064     | 1              | 0.99 | 0.97 | 0.93 | 0.87 | 0.79 | 0.73 | 0.69 | 0.66 | 0.64 | 0.62 | 0.57 | 0.54  | 0.48  | 0.47  | 0.45  | 0.44  | 0.41  |
| Canada  | G0066     | 1              | 0.99 | 0.96 | 0.92 | 0.86 | 0.80 | 0.74 | 0.69 | 0.64 | 0.59 | 0.56 | 0.52 | 0.49  | 0.47  | 0.44  | 0.41  | 0.37  | 0.33  |
| Canada  | G0067     | 1              | 0.73 | 0.60 | 0.55 | 0.52 | 0.50 | 0.46 | 0.42 | 0.37 | 0.36 | 0.34 | 0.32 | 0.31  | 0.26  | 0.24  | 0.23  | 0.20  | 0.15  |
| Canada  | G0068     | 1              | 1.00 | 1.00 | 0.99 | 0.98 | 0.96 | 0.93 | 0.91 | 0.89 | 0.87 | 0.85 | 0.81 | 0.77  | 0.75  | 0.72  | 0.68  | 0.62  | 0.57  |
| Canada  | G0069     | 1              | 0.99 | 0.98 | 0.96 | 0.94 | 0.92 | 0.91 | 0.89 | 0.88 | 0.87 | 0.86 | 0.84 | 0.82  | 0.80  | 0.79  | 0.79  | 0.77  | 0.75  |
| Canada  | G0072     | 1              | 1.00 | 0.98 | 0.95 | 0.91 | 0.86 | 0.81 | 0.77 | 0.73 | 0.70 | 0.67 | 0.61 | 0.55  | 0.49  | 0.46  | 0.43  | 0.34  | 0.26  |
| Canada  | G0075     | 1              | 1.00 | 0.98 | 0.93 | 0.86 | 0.77 | 0.68 | 0.56 | 0.43 | 0.30 | 0.20 | 0.04 | -0.07 | -0.15 | -0.20 | -0.24 | -0.36 | -0.43 |
| Canada  | G0077     | 1              | 1.00 | 0.99 | 0.99 | 0.98 | 0.97 | 0.96 | 0.95 | 0.93 | 0.92 | 0.91 | 0.90 | 0.88  | 0.86  | 0.84  | 0.82  | 0.76  | 0.69  |
| Canada  | G0081     | 1              | 1.00 | 0.99 | 0.98 | 0.96 | 0.95 | 0.94 | 0.93 | 0.92 | 0.91 | 0.90 | 0.88 | 0.86  | 0.84  | 0.83  | 0.81  | 0.77  | 0.73  |
| Canada  | G0083     | 1              | 1.00 | 0.98 | 0.96 | 0.92 | 0.87 | 0.82 | 0.77 | 0.73 | 0.70 | 0.67 | 0.62 | 0.59  | 0.56  | 0.53  | 0.49  | 0.43  | 0.37  |
| Canada  | G0084     | 1              | 0.96 | 0.80 | 0.59 | 0.43 | 0.33 | 0.26 | 0.21 | 0.18 | 0.16 | 0.14 | 0.12 | 0.11  | 0.10  | 0.08  | 0.05  | 0.05  | 0.04  |
| Canada  | G0085     | 1              | 1.00 | 0.98 | 0.95 | 0.90 | 0.83 | 0.77 | 0.70 | 0.65 | 0.61 | 0.57 | 0.50 | 0.44  | 0.40  | 0.37  | 0.36  | 0.33  | 0.30  |
| Canada  | G0087     | 1              | 1.00 | 0.99 | 0.98 | 0.97 | 0.96 | 0.95 | 0.94 | 0.93 | 0.92 | 0.91 | 0.89 | 0.87  | 0.85  | 0.83  | 0.82  | 0.80  | 0.78  |
| Canada  | G0090     | 1              | 1.00 | 0.99 | 0.98 | 0.97 | 0.95 | 0.93 | 0.91 | 0.88 | 0.86 | 0.82 | 0.73 | 0.62  | 0.51  | 0.40  | 0.30  | 0.09  | -0.07 |

| Country | GloFAS ID | Station filter | LT1  | LT2  | LT3  | LT4  | LT5  | LT6  | LT7   | LT8   | LT9   | LT10  | LT12  | LT14  | LT16  | LT18  | LT20  | LT25  | L30   |
|---------|-----------|----------------|------|------|------|------|------|------|-------|-------|-------|-------|-------|-------|-------|-------|-------|-------|-------|
| Canada  | G0092     | 1              | 0.99 | 0.96 | 0.86 | 0.75 | 0.65 | 0.58 | 0.51  | 0.46  | 0.42  | 0.39  | 0.35  | 0.33  | 0.31  | 0.34  | 0.37  | 0.35  | 0.31  |
| Canada  | G0093     | 1              | 0.88 | 0.77 | 0.69 | 0.62 | 0.57 | 0.52 | 0.49  | 0.46  | 0.44  | 0.42  | 0.40  | 0.36  | 0.35  | 0.33  | 0.31  | 0.27  | 0.22  |
| Canada  | G0097     | 1              | 0.99 | 0.98 | 0.96 | 0.93 | 0.89 | 0.85 | 0.81  | 0.77  | 0.73  | 0.69  | 0.64  | 0.59  | 0.54  | 0.51  | 0.48  | 0.41  | 0.36  |
| Canada  | G0098     | 1              | 0.94 | 0.83 | 0.78 | 0.75 | 0.73 | 0.71 | 0.69  | 0.67  | 0.66  | 0.65  | 0.63  | 0.62  | 0.59  | 0.52  | 0.50  | 0.46  | 0.44  |
| Canada  | G0101     | 1              | 0.98 | 0.88 | 0.79 | 0.75 | 0.72 | 0.69 | 0.67  | 0.66  | 0.64  | 0.62  | 0.60  | 0.59  | 0.56  | 0.49  | 0.44  | 0.39  | 0.36  |
| Canada  | G0103     | 1              | 0.98 | 0.96 | 0.95 | 0.94 | 0.93 | 0.93 | 0.92  | 0.91  | 0.91  | 0.90  | 0.90  | 0.89  | 0.88  | 0.88  | 0.88  | 0.88  | 0.87  |
| Canada  | G0104     | 1              | 0.99 | 0.97 | 0.90 | 0.78 | 0.62 | 0.45 | 0.30  | 0.17  | 0.05  | -0.05 | -0.21 | -0.33 | -0.43 | -0.53 | -0.63 | -0.80 | -0.95 |
| Canada  | G0105     | 1              | 0.97 | 0.95 | 0.92 | 0.91 | 0.90 | 0.89 | 0.89  | 0.88  | 0.88  | 0.88  | 0.87  | 0.86  | 0.86  | 0.86  | 0.85  | 0.83  | 0.82  |
| Canada  | G0106     | 1              | 0.96 | 0.92 | 0.85 | 0.74 | 0.60 | 0.46 | 0.36  | 0.29  | 0.23  | 0.18  | 0.12  | 0.07  | 0.03  | -0.02 | -0.07 | -0.14 | -0.17 |
| Canada  | G0107     | 1              | 0.99 | 0.97 | 0.91 | 0.78 | 0.56 | 0.33 | 0.16  | 0.03  | -0.07 | -0.15 | -0.25 | -0.32 | -0.38 | -0.48 | -0.60 | -0.71 | -0.75 |
| Canada  | G0110     | 1              | 0.99 | 0.98 | 0.94 | 0.87 | 0.76 | 0.65 | 0.54  | 0.42  | 0.28  | 0.16  | -0.05 | -0.24 | -0.43 | -0.58 | -0.67 | -0.72 | -0.73 |
| Canada  | G0111     | 1              | 1.00 | 1.00 | 1.00 | 0.99 | 0.99 | 0.99 | 0.98  | 0.97  | 0.96  | 0.95  | 0.93  | 0.91  | 0.89  | 0.86  | 0.83  | 0.77  | 0.73  |
| Canada  | G0112     | 1              | 0.85 | 0.70 | 0.57 | 0.45 | 0.31 | 0.21 | 0.12  | 0.00  | -0.10 | -0.19 | -0.38 | -0.52 | -0.66 | -0.76 | -0.81 | -0.85 | -0.81 |
| Canada  | G0115     | 1              | 0.99 | 0.97 | 0.93 | 0.89 | 0.85 | 0.82 | 0.79  | 0.76  | 0.73  | 0.70  | 0.64  | 0.59  | 0.55  | 0.51  | 0.47  | 0.39  | 0.34  |
| Canada  | G0119     | 1              | 0.98 | 0.88 | 0.64 | 0.37 | 0.17 | 0.03 | -0.09 | -0.18 | -0.25 | -0.31 | -0.40 | -0.46 | -0.52 | -0.62 | -0.70 | -0.80 | -0.84 |
| Canada  | G0121     | 1              | 0.99 | 0.93 | 0.81 | 0.70 | 0.58 | 0.47 | 0.34  | 0.23  | 0.12  | 0.02  | -0.15 | -0.28 | -0.40 | -0.49 | -0.57 | -0.76 | -0.96 |
| Canada  | G0122     | 1              | 0.90 | 0.76 | 0.57 | 0.40 | 0.30 | 0.24 | 0.19  | 0.15  | 0.13  | 0.11  | 0.08  | 0.06  | 0.05  | 0.07  | 0.08  | 0.07  | 0.08  |
| Canada  | G0125     | 1              | 1.00 | 0.97 | 0.91 | 0.85 | 0.79 | 0.73 | 0.68  | 0.64  | 0.60  | 0.58  | 0.54  | 0.51  | 0.49  | 0.46  | 0.43  | 0.39  | 0.35  |
| Canada  | G0127     | 1              | 0.98 | 0.89 | 0.78 | 0.68 | 0.58 | 0.50 | 0.41  | 0.34  | 0.29  | 0.25  | 0.20  | 0.16  | 0.12  | 0.07  | 0.04  | -0.01 | -0.05 |
| Canada  | G0128     | 1              | 0.89 | 0.75 | 0.68 | 0.65 | 0.61 | 0.57 | 0.54  | 0.51  | 0.48  | 0.45  | 0.43  | 0.38  | 0.32  | 0.21  | 0.18  | 0.14  | 0.10  |
| Canada  | G0132     | 1              | 1.00 | 0.98 | 0.97 | 0.94 | 0.92 | 0.89 | 0.87  | 0.84  | 0.82  | 0.79  | 0.74  | 0.68  | 0.60  | 0.51  | 0.40  | 0.07  | -0.33 |
| Canada  | G0135     | 1              | 0.92 | 0.72 | 0.56 | 0.47 | 0.41 | 0.36 | 0.32  | 0.30  | 0.27  | 0.24  | 0.24  | 0.21  | 0.20  | 0.11  | 0.09  | 0.06  | 0.03  |
| Canada  | G0136     | 1              | 1.00 | 1.00 | 1.00 | 1.00 | 0.99 | 0.99 | 0.99  | 0.98  | 0.98  | 0.97  | 0.96  | 0.95  | 0.94  | 0.93  | 0.92  | 0.89  | 0.85  |
| Canada  | G0137     | 1              | 0.91 | 0.84 | 0.80 | 0.75 | 0.70 | 0.69 | 0.68  | 0.67  | 0.65  | 0.64  | 0.60  | 0.57  | 0.54  | 0.52  | 0.50  | 0.48  | 0.44  |
| Canada  | G0143     | 1              | 0.97 | 0.95 | 0.93 | 0.91 | 0.89 | 0.87 | 0.86  | 0.84  | 0.83  | 0.82  | 0.78  | 0.76  | 0.73  | 0.68  | 0.64  | 0.60  | 0.56  |
| Canada  | G0146     | 1              | 0.97 | 0.93 | 0.90 | 0.87 | 0.85 | 0.83 | 0.81  | 0.80  | 0.79  | 0.78  | 0.76  | 0.73  | 0.71  | 0.69  | 0.68  | 0.64  | 0.61  |
| Canada  | G0147     | 1              | 1.00 | 1.00 | 0.99 | 0.99 | 0.98 | 0.96 | 0.95  | 0.93  | 0.92  | 0.90  | 0.86  | 0.83  | 0.79  | 0.75  | 0.72  | 0.65  | 0.54  |
| Canada  | G0148     | 1              | 1.00 | 0.99 | 0.99 | 0.98 | 0.98 | 0.97 | 0.96  | 0.95  | 0.93  | 0.91  | 0.86  | 0.80  | 0.71  | 0.61  | 0.50  | 0.15  | -0.28 |
| Canada  | G0149     | 1              | 0.95 | 0.89 | 0.85 | 0.81 | 0.77 | 0.74 | 0.71  | 0.68  | 0.66  | 0.65  | 0.63  | 0.61  | 0.59  | 0.60  | 0.57  | 0.54  | 0.48  |
| Canada  | G0152     | 1              | 0.97 | 0.90 | 0.81 | 0.69 | 0.62 | 0.59 | 0.56  | 0.50  | 0.45  | 0.44  | 0.44  | 0.42  | 0.42  | 0.43  | 0.46  | 0.46  | 0.48  |
| Canada  | G0154     | 1              | 0.99 | 0.97 | 0.92 | 0.84 | 0.72 | 0.56 | 0.39  | 0.21  | 0.04  | -0.12 | -0.39 | -0.58 | -0.71 | -0.82 | -0.89 | -0.97 | -1.01 |
| Canada  | G0156     | 1              | 1.00 | 0.97 | 0.89 | 0.74 | 0.53 | 0.30 | 0.11  | -0.04 | -0.15 | -0.23 | -0.34 | -0.41 | -0.45 | -0.50 | -0.52 | -0.54 | -0.54 |
| Canada  | G0158     | 1              | 0.98 | 0.91 | 0.82 | 0.73 | 0.63 | 0.54 | 0.45  | 0.38  | 0.32  | 0.28  | 0.21  | 0.17  | 0.13  | 0.09  | 0.06  | 0.00  | -0.03 |
| Canada  | G0159     | 1              | 0.95 | 0.80 | 0.63 | 0.46 | 0.33 | 0.25 | 0.17  | 0.09  | 0.02  | -0.03 | -0.11 | -0.17 | -0.22 | -0.29 | -0.47 | -0.81 | -1.00 |
| Canada  | G0160     | 1              | 1.00 | 0.99 | 0.93 | 0.80 | 0.60 | 0.37 | 0.18  | 0.03  | -0.08 | -0.16 | -0.26 | -0.32 | -0.36 | -0.39 | -0.41 | -0.41 | -0.41 |
| Canada  | G0162     | 1              | 1.00 | 0.99 | 0.99 | 0.98 | 0.96 | 0.94 | 0.90  | 0.86  | 0.83  | 0.80  | 0.75  | 0.72  | 0.69  | 0.67  | 0.65  | 0.61  | 0.58  |
| Canada  | G0163     | 1              | 0.94 | 0.85 | 0.78 | 0.72 | 0.68 | 0.65 | 0.61  | 0.58  | 0.55  | 0.53  | 0.49  | 0.45  | 0.41  | 0.36  | 0.33  | 0.25  | 0.17  |
| Canada  | G0165     | 1              | 0.96 | 0.89 | 0.81 | 0.73 | 0.64 | 0.54 | 0.44  | 0.37  | 0.31  | 0.27  | 0.20  | 0.15  | 0.12  | 0.07  | 0.04  | -0.02 | -0.06 |
| Canada  | G0167     | 1              | 0.97 | 0.93 | 0.87 | 0.78 | 0.66 | 0.52 | 0.38  | 0.28  | 0.21  | 0.15  | 0.07  | 0.02  | -0.03 | -0.08 | -0.11 | -0.15 | -0.18 |

| Country | GloFAS ID | Station filter | LT1  | LT2  | LT3  | LT4  | LT5  | LT6  | LT7  | LT8   | LT9   | LT10  | LT12  | LT14  | LT16  | LT18  | LT20  | LT25  | L30   |
|---------|-----------|----------------|------|------|------|------|------|------|------|-------|-------|-------|-------|-------|-------|-------|-------|-------|-------|
| Canada  | G0169     | 1              | 0.90 | 0.78 | 0.71 | 0.66 | 0.64 | 0.62 | 0.59 | 0.58  | 0.56  | 0.54  | 0.52  | 0.49  | 0.48  | 0.42  | 0.39  | 0.33  | 0.29  |
| Canada  | G0171     | 1              | 0.96 | 0.90 | 0.85 | 0.78 | 0.69 | 0.60 | 0.50 | 0.42  | 0.37  | 0.32  | 0.25  | 0.20  | 0.16  | 0.10  | 0.06  | 0.00  | -0.05 |
| Canada  | G0176     | 1              | 1.00 | 1.00 | 1.00 | 0.99 | 0.99 | 0.98 | 0.98 | 0.97  | 0.96  | 0.94  | 0.92  | 0.89  | 0.86  | 0.83  | 0.80  | 0.73  | 0.67  |
| Canada  | G0177     | 1              | 1.00 | 1.00 | 1.00 | 1.00 | 0.99 | 0.99 | 0.99 | 0.99  | 0.99  | 0.99  | 0.99  | 0.98  | 0.98  | 0.97  | 0.97  | 0.96  | 0.94  |
| Canada  | G0178     | 1              | 1.00 | 0.99 | 0.98 | 0.95 | 0.92 | 0.88 | 0.83 | 0.78  | 0.75  | 0.72  | 0.67  | 0.64  | 0.62  | 0.59  | 0.58  | 0.55  | 0.53  |
| Canada  | G0179     | 1              | 0.85 | 0.73 | 0.65 | 0.60 | 0.58 | 0.57 | 0.54 | 0.53  | 0.53  | 0.51  | 0.50  | 0.48  | 0.49  | 0.43  | 0.41  | 0.35  | 0.34  |
| Canada  | G0180     | 1              | 0.99 | 0.96 | 0.92 | 0.89 | 0.86 | 0.84 | 0.82 | 0.80  | 0.78  | 0.76  | 0.73  | 0.69  | 0.65  | 0.62  | 0.59  | 0.52  | 0.45  |
| Canada  | G0181     | 1              | 1.00 | 1.00 | 0.99 | 0.99 | 0.98 | 0.96 | 0.94 | 0.93  | 0.92  | 0.91  | 0.89  | 0.87  | 0.86  | 0.85  | 0.84  | 0.82  | 0.77  |
| Canada  | G0182     | 1              | 1.00 | 0.99 | 0.98 | 0.97 | 0.95 | 0.93 | 0.91 | 0.89  | 0.86  | 0.83  | 0.78  | 0.73  | 0.69  | 0.65  | 0.62  | 0.55  | 0.49  |
| Canada  | G0183     | 1              | 0.99 | 0.95 | 0.87 | 0.80 | 0.72 | 0.66 | 0.61 | 0.57  | 0.54  | 0.50  | 0.45  | 0.42  | 0.39  | 0.39  | 0.37  | 0.35  | 0.31  |
| Canada  | G0184     | 1              | 0.98 | 0.93 | 0.84 | 0.74 | 0.66 | 0.60 | 0.54 | 0.49  | 0.46  | 0.43  | 0.38  | 0.35  | 0.33  | 0.34  | 0.35  | 0.33  | 0.30  |
| Canada  | G0185     | 1              | 1.00 | 0.99 | 0.97 | 0.94 | 0.91 | 0.88 | 0.85 | 0.83  | 0.81  | 0.79  | 0.75  | 0.73  | 0.70  | 0.67  | 0.64  | 0.57  | 0.52  |
| Canada  | G0186     | 1              | 0.94 | 0.81 | 0.67 | 0.56 | 0.47 | 0.41 | 0.34 | 0.28  | 0.23  | 0.17  | 0.07  | -0.02 | -0.11 | -0.22 | -0.31 | -0.47 | -0.61 |
| Canada  | G0187     | 1              | 1.00 | 0.99 | 0.98 | 0.96 | 0.95 | 0.93 | 0.91 | 0.90  | 0.88  | 0.86  | 0.81  | 0.75  | 0.70  | 0.66  | 0.61  | 0.50  | 0.37  |
| Canada  | G0190     | 1              | 0.94 | 0.82 | 0.68 | 0.56 | 0.47 | 0.40 | 0.33 | 0.26  | 0.20  | 0.15  | 0.05  | -0.05 | -0.13 | -0.22 | -0.32 | -0.48 | -0.63 |
| Canada  | G0192     | 1              | 1.00 | 0.99 | 0.97 | 0.94 | 0.90 | 0.85 | 0.80 | 0.77  | 0.74  | 0.71  | 0.68  | 0.65  | 0.63  | 0.61  | 0.60  | 0.57  | 0.55  |
| Canada  | G0196     | 1              | 0.99 | 0.98 | 0.96 | 0.93 | 0.89 | 0.84 | 0.79 | 0.75  | 0.72  | 0.68  | 0.62  | 0.58  | 0.54  | 0.50  | 0.48  | 0.42  | 0.38  |
| Canada  | G0199     | 1              | 0.99 | 0.97 | 0.93 | 0.88 | 0.82 | 0.74 | 0.66 | 0.58  | 0.51  | 0.45  | 0.35  | 0.28  | 0.23  | 0.20  | 0.17  | 0.12  | 0.07  |
| Canada  | G0200     | 1              | 1.00 | 0.99 | 0.99 | 0.99 | 0.98 | 0.98 | 0.98 | 0.97  | 0.97  | 0.97  | 0.96  | 0.95  | 0.94  | 0.94  | 0.93  | 0.90  | 0.87  |
| Canada  | G0201     | 1              | 0.99 | 0.93 | 0.80 | 0.64 | 0.46 | 0.31 | 0.17 | 0.05  | -0.05 | -0.14 | -0.28 | -0.38 | -0.46 | -0.53 | -0.58 | -0.60 | -0.59 |
| Canada  | G0202     | 1              | 0.98 | 0.89 | 0.78 | 0.69 | 0.64 | 0.59 | 0.56 | 0.54  | 0.52  | 0.51  | 0.50  | 0.48  | 0.48  | 0.54  | 0.54  | 0.48  | 0.41  |
| Canada  | G0203     | 1              | 1.00 | 0.99 | 0.98 | 0.97 | 0.96 | 0.94 | 0.92 | 0.90  | 0.87  | 0.84  | 0.79  | 0.75  | 0.71  | 0.68  | 0.66  | 0.62  | 0.60  |
| Canada  | G0210     | 1              | 0.98 | 0.92 | 0.86 | 0.82 | 0.79 | 0.76 | 0.75 | 0.74  | 0.72  | 0.71  | 0.70  | 0.68  | 0.66  | 0.64  | 0.61  | 0.55  | 0.51  |
| Canada  | G0211     | 1              | 0.89 | 0.78 | 0.64 | 0.51 | 0.36 | 0.22 | 0.09 | -0.02 | -0.11 | -0.21 | -0.34 | -0.46 | -0.58 | -0.70 | -0.77 | -0.86 | -0.90 |
| Canada  | G0212     | 1              | 1.00 | 0.99 | 0.98 | 0.97 | 0.94 | 0.90 | 0.85 | 0.79  | 0.74  | 0.69  | 0.63  | 0.60  | 0.59  | 0.58  | 0.56  | 0.51  | 0.47  |
| Canada  | G0213     | 1              | 1.00 | 1.00 | 1.00 | 0.99 | 0.99 | 0.99 | 0.98 | 0.98  | 0.98  | 0.97  | 0.97  | 0.96  | 0.96  | 0.95  | 0.94  | 0.92  | 0.88  |
| Canada  | G0214     | 1              | 0.99 | 0.95 | 0.89 | 0.82 | 0.74 | 0.67 | 0.59 | 0.53  | 0.47  | 0.43  | 0.35  | 0.31  | 0.28  | 0.27  | 0.25  | 0.27  | 0.29  |
| Canada  | G0215     | 1              | 0.98 | 0.97 | 0.96 | 0.94 | 0.93 | 0.91 | 0.90 | 0.88  | 0.87  | 0.85  | 0.82  | 0.80  | 0.77  | 0.75  | 0.72  | 0.66  | 0.59  |
| Canada  | G0217     | 1              | 0.98 | 0.88 | 0.73 | 0.63 | 0.56 | 0.52 | 0.49 | 0.47  | 0.47  | 0.47  | 0.47  | 0.48  | 0.49  | 0.49  | 0.48  | 0.45  | 0.40  |
| Canada  | G0218     | 1              | 0.99 | 0.98 | 0.96 | 0.92 | 0.88 | 0.83 | 0.79 | 0.75  | 0.71  | 0.68  | 0.62  | 0.57  | 0.53  | 0.50  | 0.48  | 0.42  | 0.37  |
| Canada  | G0220     | 1              | 0.97 | 0.93 | 0.91 | 0.89 | 0.87 | 0.84 | 0.82 | 0.79  | 0.76  | 0.74  | 0.70  | 0.66  | 0.62  | 0.58  | 0.55  | 0.48  | 0.43  |
| Canada  | G0222     | 1              | 1.00 | 0.99 | 0.99 | 0.98 | 0.97 | 0.96 | 0.94 | 0.92  | 0.90  | 0.87  | 0.82  | 0.76  | 0.71  | 0.65  | 0.61  | 0.52  | 0.45  |
| Canada  | G0224     | 1              | 0.99 | 0.99 | 0.96 | 0.94 | 0.92 | 0.91 | 0.89 | 0.88  | 0.87  | 0.86  | 0.84  | 0.82  | 0.80  | 0.77  | 0.74  | 0.65  | 0.56  |
| Canada  | G0225     | 1              | 0.99 | 0.94 | 0.87 | 0.80 | 0.74 | 0.69 | 0.67 | 0.64  | 0.62  | 0.60  | 0.57  | 0.55  | 0.52  | 0.44  | 0.36  | 0.27  | 0.25  |
| Canada  | G0226     | 1              | 1.00 | 1.00 | 1.00 | 1.00 | 0.99 | 0.99 | 0.99 | 0.99  | 0.99  | 0.99  | 0.99  | 0.99  | 0.98  | 0.98  | 0.98  | 0.97  | 0.97  |
| Canada  | G0227     | 1              | 1.00 | 1.00 | 1.00 | 1.00 | 1.00 | 1.00 | 1.00 | 1.00  | 1.00  | 1.00  | 0.99  | 0.99  | 0.99  | 0.99  | 0.99  | 0.98  | 0.98  |
| Canada  | G0228     | 1              | 0.99 | 0.98 | 0.96 | 0.93 | 0.90 | 0.88 | 0.87 | 0.85  | 0.83  | 0.81  | 0.78  | 0.77  | 0.75  | 0.75  | 0.74  | 0.74  | 0.72  |
| Canada  | G0230     | 1              | 1.00 | 1.00 | 0.98 | 0.95 | 0.89 | 0.79 | 0.66 | 0.49  | 0.29  | 0.10  | -0.24 | -0.47 | -0.61 | -0.71 | -0.75 | -0.73 | -0.74 |
| Canada  | G0232     | 1              | 0.99 | 0.97 | 0.93 | 0.89 | 0.84 | 0.80 | 0.77 | 0.74  | 0.72  | 0.70  | 0.67  | 0.65  | 0.63  | 0.62  | 0.61  | 0.59  | 0.57  |

| Country | GloFAS ID | Station filter | LT1  | LT2  | LT3  | LT4  | LT5  | LT6  | LT7  | LT8  | LT9  | LT10  | LT12  | LT14  | LT16  | LT18  | LT20  | LT25  | L30   |
|---------|-----------|----------------|------|------|------|------|------|------|------|------|------|-------|-------|-------|-------|-------|-------|-------|-------|
| Canada  | G0233     | 1              | 1.00 | 1.00 | 1.00 | 0.99 | 0.99 | 0.99 | 0.98 | 0.98 | 0.98 | 0.98  | 0.97  | 0.97  | 0.97  | 0.96  | 0.96  | 0.96  | 0.95  |
| Canada  | G0234     | 1              | 0.99 | 0.99 | 0.98 | 0.98 | 0.98 | 0.98 | 0.97 | 0.97 | 0.97 | 0.97  | 0.97  | 0.97  | 0.96  | 0.96  | 0.96  | 0.96  | 0.95  |
| Canada  | G0235     | 1              | 1.00 | 0.99 | 0.99 | 0.98 | 0.98 | 0.97 | 0.96 | 0.95 | 0.94 | 0.93  | 0.90  | 0.87  | 0.83  | 0.80  | 0.76  | 0.66  | 0.57  |
| Canada  | G0236     | 1              | 1.00 | 0.99 | 0.98 | 0.96 | 0.94 | 0.92 | 0.91 | 0.90 | 0.88 | 0.87  | 0.86  | 0.84  | 0.83  | 0.82  | 0.81  | 0.80  | 0.79  |
| Canada  | G0237     | 1              | 1.00 | 0.99 | 0.98 | 0.96 | 0.94 | 0.92 | 0.91 | 0.89 | 0.87 | 0.86  | 0.83  | 0.81  | 0.80  | 0.79  | 0.78  | 0.76  | 0.75  |
| Canada  | G0238     | 1              | 1.00 | 1.00 | 1.00 | 1.00 | 1.00 | 1.00 | 1.00 | 1.00 | 1.00 | 0.99  | 0.99  | 0.99  | 0.99  | 0.99  | 0.99  | 0.98  | 0.97  |
| Canada  | G0239     | 1              | 1.00 | 0.99 | 0.97 | 0.94 | 0.89 | 0.84 | 0.79 | 0.74 | 0.69 | 0.64  | 0.55  | 0.48  | 0.42  | 0.37  | 0.32  | 0.22  | 0.17  |
| Canada  | G0240     | 1              | 1.00 | 1.00 | 1.00 | 1.00 | 1.00 | 0.99 | 0.99 | 0.99 | 0.99 | 0.99  | 0.99  | 0.99  | 0.98  | 0.98  | 0.98  | 0.97  | 0.96  |
| Canada  | G0241     | 1              | 1.00 | 0.99 | 0.98 | 0.96 | 0.94 | 0.92 | 0.91 | 0.89 | 0.87 | 0.86  | 0.83  | 0.81  | 0.80  | 0.79  | 0.77  | 0.76  | 0.74  |
| Canada  | G0243     | 1              | 0.98 | 0.95 | 0.89 | 0.84 | 0.79 | 0.76 | 0.74 | 0.71 | 0.69 | 0.69  | 0.66  | 0.63  | 0.61  | 0.43  | 0.30  | 0.19  | 0.18  |
| Canada  | G0244     | 1              | 1.00 | 1.00 | 0.99 | 0.98 | 0.97 | 0.96 | 0.95 | 0.93 | 0.92 | 0.90  | 0.87  | 0.85  | 0.82  | 0.80  | 0.77  | 0.72  | 0.66  |
| Canada  | G0245     | 1              | 0.98 | 0.97 | 0.95 | 0.94 | 0.93 | 0.92 | 0.90 | 0.89 | 0.88 | 0.87  | 0.85  | 0.83  | 0.80  | 0.77  | 0.74  | 0.64  | 0.51  |
| Canada  | G0246     | 1              | 0.98 | 0.92 | 0.82 | 0.72 | 0.64 | 0.57 | 0.51 | 0.45 | 0.40 | 0.36  | 0.29  | 0.23  | 0.19  | 0.14  | 0.10  | 0.04  | 0.02  |
| Canada  | G0247     | 1              | 0.98 | 0.89 | 0.73 | 0.57 | 0.45 | 0.35 | 0.27 | 0.20 | 0.14 | 0.08  | 0.00  | -0.06 | -0.10 | -0.17 | -0.19 | -0.19 | -0.20 |
| Canada  | G0248     | 1              | 0.99 | 0.94 | 0.86 | 0.77 | 0.69 | 0.63 | 0.59 | 0.56 | 0.53 | 0.51  | 0.47  | 0.45  | 0.42  | 0.40  | 0.37  | 0.33  | 0.27  |
| Canada  | G0249     | 0              | 0.97 | 0.95 | 0.92 | 0.89 | 0.86 | 0.84 | 0.82 | 0.80 | 0.78 | 0.76  | 0.73  | 0.70  | 0.68  | 0.65  | 0.62  | 0.55  | 0.51  |
| Canada  | G0250     | 1              | 0.99 | 0.99 | 0.97 | 0.96 | 0.94 | 0.91 | 0.89 | 0.86 | 0.83 | 0.80  | 0.74  | 0.68  | 0.62  | 0.56  | 0.51  | 0.38  | 0.27  |
| Canada  | G0252     | 1              | 1.00 | 1.00 | 0.99 | 0.99 | 0.98 | 0.97 | 0.96 | 0.95 | 0.93 | 0.91  | 0.88  | 0.84  | 0.80  | 0.76  | 0.72  | 0.62  | 0.53  |
| Canada  | G0254     | 1              | 0.99 | 0.97 | 0.91 | 0.82 | 0.74 | 0.67 | 0.62 | 0.57 | 0.53 | 0.50  | 0.45  | 0.40  | 0.37  | 0.36  | 0.33  | 0.30  | 0.26  |
| Canada  | G0255     | 1              | 1.00 | 0.99 | 0.99 | 0.98 | 0.97 | 0.96 | 0.94 | 0.93 | 0.91 | 0.89  | 0.85  | 0.80  | 0.75  | 0.70  | 0.66  | 0.56  | 0.47  |
| Canada  | G0256     | 1              | 0.98 | 0.96 | 0.95 | 0.95 | 0.94 | 0.93 | 0.93 | 0.92 | 0.92 | 0.91  | 0.90  | 0.89  | 0.89  | 0.88  | 0.87  | 0.86  | 0.84  |
| Canada  | G0257     | 1              | 0.98 | 0.96 | 0.95 | 0.95 | 0.94 | 0.93 | 0.93 | 0.92 | 0.92 | 0.91  | 0.90  | 0.89  | 0.89  | 0.88  | 0.87  | 0.86  | 0.84  |
| Canada  | G0258     | 1              | 0.98 | 0.92 | 0.82 | 0.70 | 0.57 | 0.45 | 0.37 | 0.30 | 0.24 | 0.19  | 0.10  | 0.01  | -0.07 | -0.18 | -0.26 | -0.43 | -0.56 |
| Canada  | G0259     | 1              | 0.99 | 0.97 | 0.96 | 0.94 | 0.93 | 0.91 | 0.90 | 0.88 | 0.87 | 0.86  | 0.83  | 0.81  | 0.79  | 0.77  | 0.75  | 0.71  | 0.67  |
| Canada  | G0262     | 1              | 0.97 | 0.76 | 0.56 | 0.42 | 0.34 | 0.28 | 0.24 | 0.22 | 0.21 | 0.21  | 0.21  | 0.21  | 0.21  | 0.23  | 0.24  | 0.23  | 0.21  |
| Canada  | G0263     | 1              | 0.99 | 0.98 | 0.98 | 0.97 | 0.97 | 0.96 | 0.96 | 0.95 | 0.95 | 0.94  | 0.93  | 0.92  | 0.91  | 0.90  | 0.88  | 0.84  | 0.80  |
| Canada  | G0265     | 1              | 1.00 | 0.99 | 0.98 | 0.97 | 0.97 | 0.96 | 0.95 | 0.93 | 0.92 | 0.91  | 0.89  | 0.86  | 0.84  | 0.82  | 0.79  | 0.74  | 0.68  |
| Canada  | G0266     | 1              | 1.00 | 1.00 | 1.00 | 0.99 | 0.99 | 0.99 | 0.99 | 0.98 | 0.98 | 0.97  | 0.95  | 0.93  | 0.89  | 0.85  | 0.80  | 0.69  | 0.57  |
| Canada  | G0267     | 1              | 1.00 | 1.00 | 1.00 | 1.00 | 1.00 | 0.99 | 0.99 | 0.99 | 0.99 | 0.99  | 0.98  | 0.98  | 0.98  | 0.98  | 0.98  | 0.97  | 0.96  |
| Canada  | G0268     | 1              | 0.99 | 0.98 | 0.94 | 0.90 | 0.84 | 0.79 | 0.75 | 0.71 | 0.67 | 0.64  | 0.58  | 0.53  | 0.49  | 0.45  | 0.43  | 0.37  | 0.31  |
| Canada  | G0269     | 1              | 0.99 | 0.93 | 0.84 | 0.69 | 0.52 | 0.35 | 0.22 | 0.10 | 0.01 | -0.08 | -0.22 | -0.32 | -0.41 | -0.50 | -0.56 | -0.60 | -0.63 |
| Canada  | G0271     | 1              | 0.99 | 0.94 | 0.88 | 0.82 | 0.77 | 0.73 | 0.70 | 0.68 | 0.65 | 0.63  | 0.60  | 0.56  | 0.52  | 0.48  | 0.42  | 0.32  | 0.24  |
| Canada  | G0272     | 1              | 0.99 | 0.97 | 0.94 | 0.89 | 0.84 | 0.79 | 0.75 | 0.71 | 0.67 | 0.65  | 0.60  | 0.57  | 0.55  | 0.54  | 0.54  | 0.53  | 0.50  |
| Canada  | G0273     | 1              | 1.00 | 0.98 | 0.94 | 0.90 | 0.85 | 0.81 | 0.76 | 0.70 | 0.64 | 0.57  | 0.40  | 0.20  | -0.01 | -0.22 | -0.42 | -0.77 | -0.93 |
| Canada  | G0274     | 1              | 1.00 | 1.00 | 0.99 | 0.98 | 0.97 | 0.96 | 0.94 | 0.92 | 0.89 | 0.86  | 0.78  | 0.70  | 0.63  | 0.58  | 0.53  | 0.45  | 0.40  |
| Canada  | G0275     | 1              | 1.00 | 1.00 | 0.99 | 0.99 | 0.99 | 0.98 | 0.97 | 0.96 | 0.94 | 0.93  | 0.91  | 0.88  | 0.85  | 0.82  | 0.78  | 0.65  | 0.55  |
| Canada  | G0276     | 1              | 1.00 | 0.96 | 0.90 | 0.83 | 0.76 | 0.71 | 0.66 | 0.62 | 0.58 | 0.54  | 0.48  | 0.43  | 0.37  | 0.35  | 0.33  | 0.26  | 0.19  |
| Canada  | G0277     | 1              | 0.95 | 0.88 | 0.80 | 0.73 | 0.68 | 0.64 | 0.61 | 0.57 | 0.55 | 0.54  | 0.52  | 0.51  | 0.47  | 0.47  | 0.45  | 0.41  | 0.39  |
| Canada  | G0278     | 1              | 0.99 | 0.97 | 0.93 | 0.90 | 0.87 | 0.85 | 0.83 | 0.81 | 0.79 | 0.77  | 0.74  | 0.71  | 0.68  | 0.65  | 0.64  | 0.59  | 0.55  |

| Country | GloFAS ID | Station filter | LT1  | LT2  | LT3  | LT4   | LT5   | LT6   | LT7   | LT8   | LT9   | LT10  | LT12  | LT14  | LT16  | LT18  | LT20  | LT25  | L30   |
|---------|-----------|----------------|------|------|------|-------|-------|-------|-------|-------|-------|-------|-------|-------|-------|-------|-------|-------|-------|
| Canada  | G0279     | 1              | 1.00 | 0.96 | 0.88 | 0.77  | 0.67  | 0.57  | 0.50  | 0.43  | 0.37  | 0.31  | 0.20  | 0.12  | 0.04  | -0.03 | -0.11 | -0.17 | -0.22 |
| Canada  | G0280     | 1              | 1.00 | 0.98 | 0.92 | 0.83  | 0.73  | 0.65  | 0.59  | 0.53  | 0.48  | 0.43  | 0.34  | 0.23  | 0.13  | 0.03  | -0.05 | -0.24 | -0.35 |
| Canada  | G0281     | 1              | 1.00 | 1.00 | 1.00 | 1.00  | 1.00  | 1.00  | 0.99  | 0.99  | 0.99  | 0.99  | 0.98  | 0.98  | 0.98  | 0.97  | 0.97  | 0.96  | 0.94  |
| Canada  | G0283     | 1              | 1.00 | 0.98 | 0.96 | 0.94  | 0.92  | 0.89  | 0.86  | 0.84  | 0.81  | 0.79  | 0.76  | 0.74  | 0.73  | 0.72  | 0.71  | 0.71  | 0.71  |
| Canada  | G0284     | 1              | 1.00 | 1.00 | 1.00 | 1.00  | 0.99  | 0.99  | 0.99  | 0.98  | 0.98  | 0.97  | 0.95  | 0.92  | 0.89  | 0.86  | 0.83  | 0.75  | 0.68  |
| Canada  | G0285     | 1              | 0.99 | 0.93 | 0.86 | 0.80  | 0.76  | 0.74  | 0.72  | 0.69  | 0.67  | 0.66  | 0.62  | 0.60  | 0.57  | 0.55  | 0.53  | 0.45  | 0.39  |
| Canada  | G0286     | 1              | 1.00 | 1.00 | 0.99 | 0.99  | 0.99  | 0.98  | 0.97  | 0.96  | 0.94  | 0.93  | 0.90  | 0.87  | 0.84  | 0.81  | 0.78  | 0.71  | 0.64  |
| Canada  | G0287     | 1              | 0.99 | 0.98 | 0.96 | 0.91  | 0.85  | 0.80  | 0.75  | 0.73  | 0.70  | 0.67  | 0.64  | 0.60  | 0.58  | 0.55  | 0.53  | 0.47  | 0.42  |
| Canada  | G0288     | 1              | 1.00 | 1.00 | 1.00 | 1.00  | 1.00  | 0.99  | 0.99  | 0.99  | 0.99  | 0.99  | 0.98  | 0.98  | 0.97  | 0.96  | 0.95  | 0.93  | 0.91  |
| Canada  | G0290     | 1              | 1.00 | 0.87 | 0.49 | -0.01 | -0.45 | -0.78 | -1.03 | -1.22 | -1.36 | -1.47 | -1.61 | -1.68 | -1.72 | -1.73 | -1.77 | -1.78 | -1.76 |
| Canada  | G0291     | 1              | 0.99 | 0.97 | 0.94 | 0.90  | 0.87  | 0.84  | 0.81  | 0.78  | 0.75  | 0.73  | 0.69  | 0.65  | 0.62  | 0.59  | 0.57  | 0.50  | 0.43  |
| Canada  | G0293     | 1              | 1.00 | 0.99 | 0.97 | 0.95  | 0.93  | 0.91  | 0.89  | 0.86  | 0.83  | 0.79  | 0.72  | 0.67  | 0.62  | 0.59  | 0.56  | 0.49  | 0.44  |
| Canada  | G0294     | 1              | 1.00 | 0.99 | 0.99 | 0.97  | 0.94  | 0.91  | 0.86  | 0.81  | 0.77  | 0.73  | 0.66  | 0.60  | 0.56  | 0.52  | 0.49  | 0.40  | 0.32  |
| Canada  | G0295     | 1              | 1.00 | 0.98 | 0.96 | 0.94  | 0.92  | 0.89  | 0.86  | 0.84  | 0.81  | 0.79  | 0.76  | 0.74  | 0.73  | 0.72  | 0.71  | 0.71  | 0.71  |
| Canada  | G0296     | 1              | 1.00 | 0.97 | 0.92 | 0.88  | 0.84  | 0.81  | 0.77  | 0.73  | 0.69  | 0.64  | 0.56  | 0.49  | 0.43  | 0.37  | 0.33  | 0.23  | 0.15  |
| Canada  | G0299     | 1              | 1.00 | 1.00 | 0.99 | 0.99  | 0.99  | 0.98  | 0.98  | 0.97  | 0.97  | 0.95  | 0.92  | 0.89  | 0.86  | 0.83  | 0.81  | 0.74  | 0.69  |
| Canada  | G0300     | 1              | 1.00 | 0.99 | 0.99 | 0.98  | 0.98  | 0.97  | 0.97  | 0.96  | 0.95  | 0.94  | 0.91  | 0.88  | 0.85  | 0.81  | 0.77  | 0.68  | 0.61  |
| Canada  | G0302     | 1              | 0.97 | 0.91 | 0.85 | 0.77  | 0.69  | 0.64  | 0.61  | 0.57  | 0.53  | 0.51  | 0.45  | 0.42  | 0.37  | 0.36  | 0.33  | 0.27  | 0.23  |
| Canada  | G0303     | 1              | 1.00 | 1.00 | 0.99 | 0.98  | 0.97  | 0.95  | 0.92  | 0.90  | 0.88  | 0.86  | 0.82  | 0.80  | 0.78  | 0.76  | 0.74  | 0.67  | 0.62  |
| Canada  | G0305     | 1              | 1.00 | 0.99 | 0.98 | 0.95  | 0.91  | 0.87  | 0.82  | 0.77  | 0.72  | 0.67  | 0.57  | 0.48  | 0.39  | 0.31  | 0.23  | 0.04  | -0.13 |
| Canada  | G0307     | 1              | 0.98 | 0.96 | 0.94 | 0.92  | 0.91  | 0.89  | 0.87  | 0.85  | 0.82  | 0.80  | 0.78  | 0.74  | 0.73  | 0.70  | 0.68  | 0.61  | 0.56  |
| Canada  | G0315     | 1              | 1.00 | 0.96 | 0.86 | 0.74  | 0.61  | 0.48  | 0.36  | 0.27  | 0.19  | 0.13  | 0.02  | -0.08 | -0.16 | -0.24 | -0.33 | -0.48 | -0.57 |
| Canada  | G0318     | 1              | 0.98 | 0.94 | 0.88 | 0.83  | 0.80  | 0.76  | 0.74  | 0.70  | 0.67  | 0.65  | 0.61  | 0.57  | 0.54  | 0.50  | 0.47  | 0.38  | 0.31  |
| Canada  | G0319     | 1              | 1.00 | 0.99 | 0.96 | 0.92  | 0.86  | 0.79  | 0.74  | 0.69  | 0.65  | 0.61  | 0.56  | 0.52  | 0.49  | 0.46  | 0.46  | 0.44  | 0.41  |
| Canada  | G0322     | 1              | 0.99 | 0.94 | 0.85 | 0.79  | 0.75  | 0.72  | 0.70  | 0.68  | 0.67  | 0.66  | 0.63  | 0.61  | 0.58  | 0.53  | 0.46  | 0.35  | 0.26  |
| Canada  | G0324     | 1              | 0.98 | 0.94 | 0.89 | 0.86  | 0.85  | 0.83  | 0.81  | 0.80  | 0.78  | 0.76  | 0.74  | 0.72  | 0.71  | 0.69  | 0.68  | 0.65  | 0.64  |
| Canada  | G0326     | 1              | 1.00 | 0.97 | 0.95 | 0.93  | 0.90  | 0.86  | 0.81  | 0.75  | 0.70  | 0.64  | 0.53  | 0.43  | 0.35  | 0.30  | 0.25  | 0.13  | 0.04  |
| Canada  | G0334     | 1              | 1.00 | 1.00 | 1.00 | 1.00  | 0.99  | 0.99  | 0.99  | 0.99  | 0.99  | 0.99  | 0.98  | 0.98  | 0.98  | 0.97  | 0.97  | 0.96  | 0.96  |
| Canada  | G0335     | 1              | 0.99 | 0.96 | 0.92 | 0.86  | 0.81  | 0.74  | 0.66  | 0.58  | 0.50  | 0.42  | 0.28  | 0.17  | 0.07  | -0.05 | -0.20 | -0.41 | -0.55 |
| Canada  | G0336     | 1              | 1.00 | 0.99 | 0.95 | 0.90  | 0.84  | 0.76  | 0.69  | 0.62  | 0.56  | 0.51  | 0.43  | 0.38  | 0.35  | 0.33  | 0.31  | 0.26  | 0.21  |
| Canada  | G0344     | 1              | 0.98 | 0.89 | 0.78 | 0.69  | 0.62  | 0.57  | 0.53  | 0.49  | 0.47  | 0.46  | 0.42  | 0.40  | 0.37  | 0.44  | 0.42  | 0.36  | 0.33  |
| Canada  | G0347     | 1              | 1.00 | 0.99 | 0.99 | 0.98  | 0.96  | 0.94  | 0.92  | 0.90  | 0.87  | 0.84  | 0.78  | 0.74  | 0.70  | 0.65  | 0.62  | 0.55  | 0.48  |
| Canada  | G0350     | 1              | 0.88 | 0.81 | 0.74 | 0.67  | 0.64  | 0.63  | 0.61  | 0.55  | 0.54  | 0.52  | 0.47  | 0.46  | 0.42  | 0.40  | 0.38  | 0.35  | 0.33  |
| Canada  | G0351     | 1              | 0.97 | 0.95 | 0.91 | 0.86  | 0.82  | 0.77  | 0.71  | 0.67  | 0.63  | 0.60  | 0.54  | 0.50  | 0.48  | 0.44  | 0.43  | 0.41  | 0.40  |
| Canada  | G0352     | 1              | 1.00 | 0.99 | 0.98 | 0.97  | 0.96  | 0.94  | 0.92  | 0.90  | 0.88  | 0.86  | 0.82  | 0.78  | 0.75  | 0.72  | 0.69  | 0.63  | 0.56  |
| Canada  | G0354     | 1              | 1.00 | 0.97 | 0.87 | 0.76  | 0.65  | 0.57  | 0.50  | 0.45  | 0.40  | 0.37  | 0.32  | 0.27  | 0.23  | 0.20  | 0.16  | 0.09  | 0.03  |
| Canada  | G0357     | 1              | 0.99 | 0.94 | 0.85 | 0.73  | 0.62  | 0.52  | 0.44  | 0.36  | 0.30  | 0.23  | 0.12  | 0.02  | -0.06 | -0.15 | -0.24 | -0.36 | -0.43 |
| Canada  | G0363     | 1              | 1.00 | 0.98 | 0.94 | 0.86  | 0.76  | 0.66  | 0.57  | 0.50  | 0.44  | 0.39  | 0.33  | 0.29  | 0.27  | 0.25  | 0.24  | 0.22  | 0.19  |
| Canada  | G0366     | 1              | 0.96 | 0.86 | 0.75 | 0.66  | 0.60  | 0.55  | 0.50  | 0.45  | 0.41  | 0.39  | 0.32  | 0.27  | 0.21  | 0.21  | 0.19  | 0.08  | -0.02 |

| Country | GloFAS ID | Station filter | LT1  | LT2  | LT3  | LT4  | LT5   | LT6   | LT7   | LT8   | LT9   | LT10  | LT12  | LT14  | LT16  | LT18  | LT20  | LT25  | L30   |
|---------|-----------|----------------|------|------|------|------|-------|-------|-------|-------|-------|-------|-------|-------|-------|-------|-------|-------|-------|
| Canada  | G0367     | 1              | 1.00 | 1.00 | 0.99 | 0.99 | 0.98  | 0.97  | 0.96  | 0.95  | 0.94  | 0.93  | 0.91  | 0.88  | 0.86  | 0.83  | 0.80  | 0.73  | 0.66  |
| Canada  | G0369     | 1              | 1.00 | 1.00 | 1.00 | 0.99 | 0.99  | 0.98  | 0.98  | 0.97  | 0.96  | 0.95  | 0.94  | 0.92  | 0.89  | 0.87  | 0.84  | 0.77  | 0.70  |
| Canada  | G0370     | 1              | 1.00 | 0.99 | 0.97 | 0.91 | 0.82  | 0.68  | 0.53  | 0.37  | 0.23  | 0.12  | -0.05 | -0.16 | -0.22 | -0.26 | -0.30 | -0.33 | -0.35 |
| Canada  | G0371     | 1              | 1.00 | 0.99 | 0.97 | 0.91 | 0.83  | 0.75  | 0.67  | 0.61  | 0.55  | 0.49  | 0.42  | 0.35  | 0.29  | 0.24  | 0.21  | 0.13  | 0.04  |
| Canada  | G0372     | 1              | 1.00 | 0.97 | 0.84 | 0.66 | 0.49  | 0.37  | 0.28  | 0.22  | 0.18  | 0.15  | 0.11  | 0.09  | 0.07  | 0.00  | -0.05 | -0.09 | -0.11 |
| Canada  | G0373     | 1              | 1.00 | 0.99 | 0.98 | 0.97 | 0.96  | 0.94  | 0.92  | 0.91  | 0.89  | 0.87  | 0.84  | 0.81  | 0.78  | 0.75  | 0.73  | 0.67  | 0.60  |
| Canada  | G0375     | 1              | 1.00 | 1.00 | 1.00 | 1.00 | 0.99  | 0.99  | 0.99  | 0.98  | 0.98  | 0.97  | 0.97  | 0.96  | 0.95  | 0.94  | 0.94  | 0.91  | 0.87  |
| Canada  | G0377     | 1              | 0.99 | 0.91 | 0.77 | 0.66 | 0.57  | 0.50  | 0.44  | 0.40  | 0.36  | 0.33  | 0.29  | 0.26  | 0.23  | 0.16  | 0.10  | 0.04  | 0.02  |
| Canada  | G0378     | 1              | 1.00 | 0.99 | 0.99 | 0.97 | 0.96  | 0.95  | 0.95  | 0.94  | 0.93  | 0.92  | 0.91  | 0.90  | 0.89  | 0.88  | 0.87  | 0.84  | 0.80  |
| Canada  | G0379     | 1              | 1.00 | 1.00 | 0.99 | 0.98 | 0.97  | 0.96  | 0.95  | 0.94  | 0.93  | 0.92  | 0.90  | 0.88  | 0.86  | 0.84  | 0.82  | 0.77  | 0.71  |
| Canada  | G0381     | 1              | 0.99 | 0.93 | 0.83 | 0.74 | 0.66  | 0.60  | 0.54  | 0.49  | 0.46  | 0.43  | 0.39  | 0.37  | 0.36  | 0.36  | 0.36  | 0.31  | 0.25  |
| Canada  | G0382     | 1              | 1.00 | 0.99 | 0.98 | 0.98 | 0.97  | 0.96  | 0.95  | 0.94  | 0.94  | 0.93  | 0.92  | 0.91  | 0.90  | 0.88  | 0.87  | 0.84  | 0.80  |
| Canada  | G0383     | 1              | 0.99 | 0.97 | 0.94 | 0.89 | 0.82  | 0.74  | 0.64  | 0.53  | 0.43  | 0.33  | 0.17  | 0.04  | -0.05 | -0.12 | -0.19 | -0.31 | -0.37 |
| Canada  | G0384     | 1              | 0.98 | 0.68 | 0.31 | 0.04 | -0.14 | -0.27 | -0.36 | -0.42 | -0.46 | -0.47 | -0.49 | -0.47 | -0.45 | -0.45 | -0.45 | -0.47 | -0.53 |
| Canada  | G0385     | 1              | 1.00 | 1.00 | 1.00 | 0.99 | 0.99  | 0.99  | 0.99  | 0.99  | 0.98  | 0.98  | 0.97  | 0.96  | 0.95  | 0.94  | 0.93  | 0.89  | 0.85  |
| Canada  | G0387     | 1              | 1.00 | 1.00 | 1.00 | 0.99 | 0.99  | 0.99  | 0.99  | 0.98  | 0.97  | 0.97  | 0.95  | 0.94  | 0.92  | 0.91  | 0.89  | 0.83  | 0.76  |
| Canada  | G0388     | 1              | 1.00 | 0.99 | 0.99 | 0.97 | 0.96  | 0.94  | 0.92  | 0.90  | 0.88  | 0.86  | 0.82  | 0.79  | 0.76  | 0.74  | 0.72  | 0.67  | 0.64  |
| Canada  | G0389     | 1              | 1.00 | 0.99 | 0.98 | 0.97 | 0.96  | 0.95  | 0.93  | 0.91  | 0.89  | 0.87  | 0.82  | 0.77  | 0.71  | 0.67  | 0.62  | 0.55  | 0.49  |
| Canada  | G0392     | 1              | 1.00 | 0.99 | 0.97 | 0.92 | 0.85  | 0.77  | 0.69  | 0.62  | 0.56  | 0.51  | 0.42  | 0.36  | 0.30  | 0.24  | 0.21  | 0.14  | 0.05  |
| Canada  | G0393     | 1              | 1.00 | 1.00 | 1.00 | 0.99 | 0.97  | 0.93  | 0.88  | 0.81  | 0.75  | 0.68  | 0.55  | 0.45  | 0.36  | 0.27  | 0.20  | 0.07  | -0.02 |
| Canada  | G0397     | 1              | 0.99 | 0.87 | 0.69 | 0.56 | 0.48  | 0.42  | 0.38  | 0.36  | 0.34  | 0.33  | 0.31  | 0.30  | 0.29  | 0.17  | 0.12  | 0.09  | 0.09  |
| Canada  | G0398     | 1              | 1.00 | 1.00 | 1.00 | 0.99 | 0.98  | 0.97  | 0.96  | 0.94  | 0.92  | 0.90  | 0.85  | 0.82  | 0.78  | 0.75  | 0.72  | 0.67  | 0.62  |
| Canada  | G0400     | 1              | 1.00 | 0.99 | 0.98 | 0.94 | 0.89  | 0.83  | 0.77  | 0.70  | 0.64  | 0.58  | 0.47  | 0.38  | 0.29  | 0.21  | 0.14  | 0.02  | -0.05 |
| Canada  | G0401     | 1              | 1.00 | 1.00 | 0.98 | 0.96 | 0.93  | 0.89  | 0.85  | 0.80  | 0.75  | 0.70  | 0.62  | 0.55  | 0.49  | 0.44  | 0.41  | 0.36  | 0.31  |
| Canada  | G0402     | 1              | 1.00 | 0.99 | 0.98 | 0.97 | 0.95  | 0.93  | 0.91  | 0.90  | 0.87  | 0.85  | 0.82  | 0.78  | 0.75  | 0.73  | 0.71  | 0.67  | 0.63  |
| Canada  | G0403     | 1              | 1.00 | 1.00 | 1.00 | 1.00 | 1.00  | 1.00  | 0.99  | 0.99  | 0.98  | 0.98  | 0.95  | 0.92  | 0.89  | 0.85  | 0.82  | 0.75  | 0.69  |
| Canada  | G0404     | 1              | 1.00 | 0.99 | 0.98 | 0.95 | 0.91  | 0.85  | 0.79  | 0.74  | 0.69  | 0.65  | 0.58  | 0.53  | 0.50  | 0.47  | 0.46  | 0.43  | 0.39  |
| Canada  | G0407     | 1              | 1.00 | 0.99 | 0.98 | 0.97 | 0.96  | 0.93  | 0.90  | 0.88  | 0.85  | 0.81  | 0.74  | 0.67  | 0.60  | 0.54  | 0.50  | 0.42  | 0.36  |
| Canada  | G0408     | 1              | 1.00 | 1.00 | 0.99 | 0.99 | 0.98  | 0.97  | 0.97  | 0.96  | 0.95  | 0.94  | 0.93  | 0.91  | 0.89  | 0.87  | 0.84  | 0.77  | 0.69  |
| Canada  | G0410     | 1              | 1.00 | 0.93 | 0.81 | 0.68 | 0.57  | 0.47  | 0.40  | 0.36  | 0.32  | 0.30  | 0.28  | 0.28  | 0.28  | 0.29  | 0.29  | 0.27  | 0.23  |
| Canada  | G0413     | 1              | 0.92 | 0.84 | 0.76 | 0.68 | 0.61  | 0.55  | 0.49  | 0.43  | 0.38  | 0.33  | 0.23  | 0.16  | 0.10  | 0.06  | 0.02  | -0.06 | -0.12 |
| Canada  | G0414     | 1              | 0.99 | 0.98 | 0.97 | 0.95 | 0.93  | 0.90  | 0.88  | 0.86  | 0.84  | 0.82  | 0.78  | 0.75  | 0.72  | 0.70  | 0.67  | 0.63  | 0.59  |
| Canada  | G0415     | 1              | 1.00 | 0.99 | 0.96 | 0.92 | 0.87  | 0.80  | 0.74  | 0.68  | 0.62  | 0.57  | 0.47  | 0.39  | 0.31  | 0.24  | 0.20  | 0.14  | 0.08  |
| Canada  | G0417     | 1              | 0.99 | 0.97 | 0.94 | 0.90 | 0.87  | 0.84  | 0.81  | 0.80  | 0.79  | 0.77  | 0.73  | 0.70  | 0.69  | 0.66  | 0.65  | 0.59  | 0.53  |
| Canada  | G0418     | 1              | 0.99 | 0.93 | 0.84 | 0.74 | 0.65  | 0.57  | 0.51  | 0.45  | 0.40  | 0.36  | 0.27  | 0.20  | 0.14  | 0.12  | 0.10  | 0.01  | -0.05 |
| Canada  | G0419     | 1              | 1.00 | 0.99 | 0.97 | 0.93 | 0.90  | 0.87  | 0.84  | 0.81  | 0.79  | 0.78  | 0.74  | 0.71  | 0.68  | 0.67  | 0.65  | 0.59  | 0.53  |
| Canada  | G0420     | 1              | 1.00 | 1.00 | 0.99 | 0.98 | 0.97  | 0.96  | 0.95  | 0.94  | 0.93  | 0.92  | 0.88  | 0.84  | 0.79  | 0.73  | 0.69  | 0.60  | 0.54  |
| Canada  | G0421     | 1              | 1.00 | 1.00 | 0.99 | 0.98 | 0.96  | 0.93  | 0.90  | 0.87  | 0.84  | 0.79  | 0.72  | 0.64  | 0.58  | 0.52  | 0.47  | 0.40  | 0.35  |
| Canada  | G0424     | 1              | 0.98 | 0.95 | 0.89 | 0.81 | 0.72  | 0.61  | 0.50  | 0.39  | 0.29  | 0.20  | 0.06  | -0.06 | -0.17 | -0.28 | -0.37 | -0.53 | -0.62 |

| Country | GloFAS ID | Station filter | LT1  | LT2  | LT3  | LT4  | LT5  | LT6  | LT7   | LT8   | LT9   | LT10  | LT12  | LT14  | LT16  | LT18  | LT20  | LT25  | L30   |
|---------|-----------|----------------|------|------|------|------|------|------|-------|-------|-------|-------|-------|-------|-------|-------|-------|-------|-------|
| Canada  | G0425     | 1              | 1.00 | 1.00 | 1.00 | 0.99 | 0.99 | 0.98 | 0.97  | 0.96  | 0.96  | 0.95  | 0.93  | 0.91  | 0.89  | 0.87  | 0.85  | 0.80  | 0.76  |
| Canada  | G0427     | 1              | 0.99 | 0.98 | 0.96 | 0.95 | 0.93 | 0.92 | 0.90  | 0.88  | 0.85  | 0.82  | 0.74  | 0.67  | 0.60  | 0.54  | 0.48  | 0.37  | 0.31  |
| Canada  | G0430     | 1              | 1.00 | 1.00 | 0.99 | 0.98 | 0.97 | 0.95 | 0.92  | 0.89  | 0.86  | 0.82  | 0.75  | 0.68  | 0.61  | 0.55  | 0.51  | 0.42  | 0.37  |
| Canada  | G0433     | 1              | 1.00 | 1.00 | 1.00 | 1.00 | 0.99 | 0.99 | 0.99  | 0.99  | 0.98  | 0.98  | 0.97  | 0.95  | 0.93  | 0.91  | 0.89  | 0.80  | 0.69  |
| Canada  | G0438     | 1              | 0.98 | 0.91 | 0.77 | 0.61 | 0.47 | 0.37 | 0.29  | 0.23  | 0.18  | 0.15  | 0.10  | 0.07  | 0.04  | 0.01  | 0.00  | 0.00  | 0.00  |
| Canada  | G0443     | 1              | 1.00 | 1.00 | 0.98 | 0.97 | 0.94 | 0.90 | 0.87  | 0.83  | 0.79  | 0.76  | 0.70  | 0.65  | 0.62  | 0.60  | 0.58  | 0.54  | 0.50  |
| Canada  | G0448     | 1              | 0.99 | 0.98 | 0.96 | 0.94 | 0.91 | 0.89 | 0.87  | 0.85  | 0.83  | 0.82  | 0.78  | 0.73  | 0.68  | 0.61  | 0.52  | 0.33  | 0.18  |
| Canada  | G0451     | 1              | 1.00 | 1.00 | 1.00 | 0.99 | 0.99 | 0.98 | 0.97  | 0.96  | 0.95  | 0.93  | 0.89  | 0.85  | 0.80  | 0.76  | 0.73  | 0.65  | 0.59  |
| Canada  | G0462     | 1              | 1.00 | 1.00 | 1.00 | 0.99 | 0.99 | 0.98 | 0.96  | 0.89  | 0.73  | 0.52  | 0.13  | -0.12 | -0.31 | -0.48 | -0.60 | -0.70 | -0.67 |
| Canada  | G0516     | 1              | 0.99 | 0.84 | 0.70 | 0.60 | 0.55 | 0.52 | 0.49  | 0.48  | 0.48  | 0.47  | 0.47  | 0.47  | 0.46  | 0.46  | 0.45  | 0.41  | 0.37  |
| Canada  | G0519     | 1              | 1.00 | 0.99 | 0.97 | 0.92 | 0.84 | 0.76 | 0.69  | 0.64  | 0.60  | 0.57  | 0.53  | 0.52  | 0.50  | 0.48  | 0.47  | 0.42  | 0.38  |
| Canada  | G0534     | 1              | 1.00 | 0.99 | 0.96 | 0.90 | 0.83 | 0.76 | 0.69  | 0.62  | 0.55  | 0.49  | 0.38  | 0.28  | 0.20  | 0.13  | 0.07  | -0.03 | -0.10 |
| Canada  | G0536     | 1              | 0.93 | 0.87 | 0.81 | 0.77 | 0.74 | 0.70 | 0.65  | 0.62  | 0.60  | 0.58  | 0.55  | 0.53  | 0.52  | 0.50  | 0.50  | 0.49  | 0.47  |
| Canada  | G0538     | 1              | 1.00 | 0.99 | 0.97 | 0.93 | 0.87 | 0.81 | 0.75  | 0.69  | 0.65  | 0.62  | 0.57  | 0.54  | 0.52  | 0.49  | 0.47  | 0.42  | 0.38  |
| Canada  | G0543     | 1              | 1.00 | 0.99 | 0.98 | 0.96 | 0.94 | 0.92 | 0.90  | 0.88  | 0.86  | 0.83  | 0.78  | 0.73  | 0.69  | 0.64  | 0.59  | 0.49  | 0.41  |
| Canada  | G0558     | 1              | 0.98 | 0.92 | 0.84 | 0.76 | 0.66 | 0.57 | 0.49  | 0.41  | 0.33  | 0.26  | 0.14  | 0.05  | -0.05 | -0.13 | -0.19 | -0.31 | -0.40 |
| Canada  | G0561     | 1              | 1.00 | 1.00 | 0.99 | 0.99 | 0.98 | 0.96 | 0.94  | 0.91  | 0.88  | 0.85  | 0.79  | 0.73  | 0.68  | 0.63  | 0.60  | 0.52  | 0.45  |
| Canada  | G0577     | 1              | 0.99 | 0.98 | 0.95 | 0.91 | 0.88 | 0.85 | 0.82  | 0.79  | 0.76  | 0.73  | 0.68  | 0.62  | 0.58  | 0.54  | 0.50  | 0.40  | 0.32  |
| Canada  | G0581     | 1              | 0.99 | 0.98 | 0.96 | 0.94 | 0.92 | 0.89 | 0.87  | 0.85  | 0.83  | 0.80  | 0.75  | 0.70  | 0.66  | 0.62  | 0.57  | 0.47  | 0.37  |
| Canada  | G0582     | 1              | 1.00 | 0.99 | 0.99 | 0.98 | 0.97 | 0.96 | 0.95  | 0.94  | 0.92  | 0.91  | 0.89  | 0.87  | 0.84  | 0.83  | 0.81  | 0.75  | 0.71  |
| Canada  | G0584     | 1              | 1.00 | 0.99 | 0.96 | 0.89 | 0.80 | 0.70 | 0.59  | 0.48  | 0.38  | 0.28  | 0.12  | 0.00  | -0.09 | -0.16 | -0.21 | -0.28 | -0.31 |
| Canada  | G0596     | 1              | 1.00 | 1.00 | 1.00 | 0.99 | 0.99 | 0.99 | 0.99  | 0.99  | 0.98  | 0.98  | 0.97  | 0.96  | 0.96  | 0.95  | 0.93  | 0.90  | 0.86  |
| Canada  | G0650     | 1              | 1.00 | 0.99 | 0.99 | 0.98 | 0.97 | 0.96 | 0.95  | 0.94  | 0.93  | 0.91  | 0.89  | 0.87  | 0.85  | 0.83  | 0.81  | 0.78  | 0.74  |
| Canada  | G2003     | 1              | 0.98 | 0.87 | 0.67 | 0.46 | 0.31 | 0.20 | 0.12  | 0.05  | -0.02 | -0.08 | -0.13 | -0.16 | -0.14 | 0.01  | 0.02  | -0.04 | -0.05 |
| Canada  | G2004     | 1              | 0.96 | 0.86 | 0.75 | 0.69 | 0.63 | 0.60 | 0.54  | 0.47  | 0.45  | 0.42  | 0.35  | 0.31  | 0.29  | 0.24  | 0.22  | 0.11  | 0.09  |
| Canada  | G2081     | 1              | 1.00 | 0.98 | 0.95 | 0.90 | 0.85 | 0.78 | 0.72  | 0.67  | 0.61  | 0.57  | 0.48  | 0.41  | 0.39  | 0.37  | 0.33  | 0.23  | 0.18  |
| Canada  | G2114     | 1              | 0.92 | 0.75 | 0.57 | 0.38 | 0.25 | 0.11 | -0.01 | -0.06 | -0.08 | -0.08 | -0.09 | -0.10 | -0.09 | -0.07 | -0.06 | -0.05 | -0.03 |
| Canada  | G2119     | 1              | 0.97 | 0.88 | 0.75 | 0.58 | 0.42 | 0.27 | 0.09  | -0.06 | -0.10 | -0.13 | -0.14 | -0.17 | -0.17 | -0.14 | -0.09 | -0.07 | -0.03 |
| Canada  | G2190     | 1              | 1.00 | 0.99 | 0.98 | 0.98 | 0.97 | 0.96 | 0.95  | 0.93  | 0.91  | 0.90  | 0.86  | 0.83  | 0.80  | 0.78  | 0.75  | 0.69  | 0.60  |
| Canada  | G2191     | 1              | 1.00 | 1.00 | 1.00 | 0.99 | 0.97 | 0.94 | 0.90  | 0.85  | 0.80  | 0.74  | 0.64  | 0.56  | 0.51  | 0.47  | 0.44  | 0.38  | 0.34  |
| Canada  | G2192     | 1              | 0.99 | 0.97 | 0.93 | 0.86 | 0.77 | 0.69 | 0.62  | 0.56  | 0.50  | 0.44  | 0.40  | 0.34  | 0.32  | 0.27  | 0.21  | 0.17  | 0.17  |
| Canada  | G2211     | 1              | 1.00 | 0.99 | 0.96 | 0.92 | 0.88 | 0.84 | 0.80  | 0.74  | 0.69  | 0.66  | 0.59  | 0.56  | 0.51  | 0.47  | 0.43  | 0.33  | 0.29  |
| Canada  | G2216     | 1              | 0.99 | 0.96 | 0.90 | 0.83 | 0.77 | 0.70 | 0.63  | 0.57  | 0.52  | 0.49  | 0.44  | 0.41  | 0.37  | 0.32  | 0.28  | 0.27  | 0.26  |
| Canada  | G2217     | 1              | 0.99 | 0.95 | 0.90 | 0.84 | 0.78 | 0.71 | 0.64  | 0.59  | 0.55  | 0.51  | 0.45  | 0.40  | 0.38  | 0.36  | 0.34  | 0.29  | 0.28  |
| Canada  | G2245     | 1              | 1.00 | 1.00 | 0.99 | 0.98 | 0.97 | 0.95 | 0.93  | 0.89  | 0.87  | 0.84  | 0.81  | 0.79  | 0.76  | 0.73  | 0.72  | 0.67  | 0.66  |
| Canada  | G2267     | 1              | 0.99 | 0.98 | 0.95 | 0.91 | 0.85 | 0.82 | 0.80  | 0.77  | 0.76  | 0.77  | 0.75  | 0.74  | 0.72  | 0.71  | 0.67  | 0.64  | 0.61  |
| Canada  | G2268     | 1              | 0.99 | 0.97 | 0.92 | 0.85 | 0.76 | 0.66 | 0.58  | 0.53  | 0.49  | 0.43  | 0.33  | 0.26  | 0.24  | 0.20  | 0.19  | 0.19  | 0.20  |
| Canada  | G2269     | 1              | 0.98 | 0.90 | 0.77 | 0.64 | 0.57 | 0.54 | 0.50  | 0.46  | 0.41  | 0.36  | 0.32  | 0.30  | 0.26  | 0.25  | 0.23  | 0.26  | 0.23  |
| Canada  | G2294     | 1              | 0.99 | 0.96 | 0.92 | 0.88 | 0.82 | 0.77 | 0.71  | 0.66  | 0.61  | 0.57  | 0.52  | 0.49  | 0.46  | 0.44  | 0.41  | 0.37  | 0.33  |



| Country | GloFAS ID | Station filter | LT1  | LT2  | LT3  | LT4  | LT5  | LT6  | LT7  | LT8  | LT9  | LT10 | LT12 | LT14 | LT16 | LT18 | LT20 | LT25 | L30  |
|---------|-----------|----------------|------|------|------|------|------|------|------|------|------|------|------|------|------|------|------|------|------|
| Canada  | G2300     | 1              | 0.95 | 0.82 | 0.75 | 0.70 | 0.68 | 0.63 | 0.59 | 0.58 | 0.57 | 0.55 | 0.54 | 0.50 | 0.47 | 0.47 | 0.44 | 0.43 | 0.43 |
| Canada  | G2310     | 1              | 0.98 | 0.86 | 0.71 | 0.60 | 0.53 | 0.48 | 0.45 | 0.43 | 0.41 | 0.39 | 0.39 | 0.38 | 0.34 | 0.28 | 0.24 | 0.17 | 0.13 |
| Canada  | G2335     | 1              | 0.98 | 0.93 | 0.88 | 0.84 | 0.81 | 0.80 | 0.78 | 0.77 | 0.76 | 0.75 | 0.72 | 0.70 | 0.70 | 0.68 | 0.67 | 0.66 | 0.64 |
| Canada  | G2343     | 1              | 0.83 | 0.65 | 0.53 | 0.47 | 0.42 | 0.39 | 0.36 | 0.32 | 0.30 | 0.28 | 0.29 | 0.25 | 0.23 | 0.23 | 0.24 | 0.21 | 0.19 |
| Canada  | G2344     | 1              | 1.00 | 0.99 | 0.98 | 0.97 | 0.94 | 0.91 | 0.87 | 0.81 | 0.73 | 0.65 | 0.52 | 0.43 | 0.38 | 0.33 | 0.28 | 0.14 | 0.00 |
| Canada  | G2345     | 1              | 0.99 | 0.97 | 0.92 | 0.83 | 0.74 | 0.64 | 0.54 | 0.45 | 0.37 | 0.31 | 0.26 | 0.25 | 0.26 | 0.22 | 0.16 | 0.07 | 0.02 |
| Canada  | G2359     | 1              | 0.98 | 0.95 | 0.92 | 0.87 | 0.81 | 0.75 | 0.70 | 0.65 | 0.60 | 0.56 | 0.51 | 0.48 | 0.46 | 0.44 | 0.41 | 0.37 | 0.32 |
| Canada  | G2368     | 1              | 0.96 | 0.90 | 0.85 | 0.81 | 0.77 | 0.74 | 0.71 | 0.68 | 0.66 | 0.64 | 0.60 | 0.57 | 0.56 | 0.55 | 0.54 | 0.49 | 0.45 |
| Canada  | G2369     | 1              | 1.00 | 0.99 | 0.97 | 0.95 | 0.92 | 0.89 | 0.85 | 0.81 | 0.77 | 0.73 | 0.66 | 0.60 | 0.55 | 0.50 | 0.46 | 0.39 | 0.34 |
| Canada  | G2376     | 1              | 0.98 | 0.95 | 0.92 | 0.87 | 0.81 | 0.75 | 0.69 | 0.64 | 0.60 | 0.56 | 0.51 | 0.48 | 0.46 | 0.43 | 0.41 | 0.37 | 0.32 |
| Canada  | G2377     | 1              | 1.00 | 0.99 | 0.97 | 0.94 | 0.89 | 0.85 | 0.80 | 0.75 | 0.71 | 0.67 | 0.60 | 0.54 | 0.49 | 0.45 | 0.41 | 0.36 | 0.32 |
| Canada  | G2386     | 1              | 0.99 | 0.97 | 0.94 | 0.92 | 0.90 | 0.88 | 0.86 | 0.83 | 0.81 | 0.79 | 0.76 | 0.71 | 0.67 | 0.63 | 0.60 | 0.48 | 0.43 |
| Canada  | G2387     | 1              | 1.00 | 0.98 | 0.95 | 0.92 | 0.89 | 0.87 | 0.85 | 0.82 | 0.81 | 0.79 | 0.75 | 0.72 | 0.68 | 0.65 | 0.62 | 0.51 | 0.46 |
| Canada  | G2388     | 1              | 1.00 | 0.99 | 0.95 | 0.89 | 0.84 | 0.81 | 0.79 | 0.77 | 0.75 | 0.74 | 0.71 | 0.69 | 0.67 | 0.66 | 0.65 | 0.61 | 0.58 |
| Canada  | G2389     | 1              | 0.97 | 0.89 | 0.77 | 0.67 | 0.58 | 0.50 | 0.43 | 0.40 | 0.38 | 0.37 | 0.35 | 0.32 | 0.31 | 0.30 | 0.29 | 0.27 | 0.26 |
| Canada  | G2401     | 1              | 1.00 | 0.99 | 0.98 | 0.96 | 0.94 | 0.91 | 0.88 | 0.86 | 0.83 | 0.81 | 0.76 | 0.71 | 0.65 | 0.60 | 0.55 | 0.41 | 0.35 |
| Canada  | G2402     | 1              | 0.99 | 0.96 | 0.88 | 0.82 | 0.78 | 0.76 | 0.74 | 0.71 | 0.70 | 0.68 | 0.66 | 0.64 | 0.64 | 0.62 | 0.59 | 0.53 | 0.49 |
| Canada  | G2407     | 1              | 0.97 | 0.90 | 0.84 | 0.80 | 0.78 | 0.77 | 0.75 | 0.73 | 0.72 | 0.71 | 0.68 | 0.67 | 0.66 | 0.66 | 0.64 | 0.58 | 0.56 |
| Canada  | G2408     | 1              | 1.00 | 0.99 | 0.99 | 0.97 | 0.93 | 0.89 | 0.84 | 0.76 | 0.69 | 0.64 | 0.51 | 0.39 | 0.29 | 0.25 | 0.20 | 0.12 | 0.08 |
| Canada  | G2418     | 1              | 0.81 | 0.67 | 0.61 | 0.59 | 0.57 | 0.53 | 0.49 | 0.44 | 0.43 | 0.41 | 0.39 | 0.37 | 0.34 | 0.33 | 0.32 | 0.27 | 0.22 |
| Canada  | G2419     | 1              | 0.99 | 0.97 | 0.93 | 0.88 | 0.82 | 0.76 | 0.70 | 0.65 | 0.61 | 0.57 | 0.52 | 0.49 | 0.47 | 0.44 | 0.41 | 0.37 | 0.33 |
| Canada  | G2430     | 1              | 0.97 | 0.94 | 0.91 | 0.89 | 0.88 | 0.85 | 0.83 | 0.82 | 0.79 | 0.77 | 0.74 | 0.69 | 0.67 | 0.63 | 0.60 | 0.53 | 0.49 |
| Canada  | G2446     | 1              | 0.80 | 0.67 | 0.59 | 0.53 | 0.50 | 0.48 | 0.44 | 0.39 | 0.40 | 0.38 | 0.37 | 0.34 | 0.36 | 0.39 | 0.38 | 0.33 | 0.31 |
| Canada  | G2447     | 1              | 0.99 | 0.97 | 0.93 | 0.88 | 0.82 | 0.75 | 0.70 | 0.65 | 0.61 | 0.57 | 0.52 | 0.50 | 0.47 | 0.44 | 0.41 | 0.37 | 0.33 |
| Canada  | G2469     | 1              | 1.00 | 0.98 | 0.96 | 0.92 | 0.88 | 0.84 | 0.79 | 0.75 | 0.73 | 0.71 | 0.67 | 0.65 | 0.62 | 0.60 | 0.59 | 0.56 | 0.55 |
| Canada  | G2470     | 1              | 1.00 | 0.99 | 0.99 | 0.99 | 0.99 | 0.99 | 0.99 | 0.99 | 0.99 | 0.99 | 0.99 | 0.98 | 0.98 | 0.97 | 0.97 | 0.94 | 0.92 |
| Canada  | G2483     | 1              | 1.00 | 0.99 | 0.99 | 0.98 | 0.97 | 0.96 | 0.95 | 0.93 | 0.92 | 0.90 | 0.86 | 0.82 | 0.78 | 0.76 | 0.73 | 0.69 | 0.67 |
| Canada  | G2525     | 1              | 1.00 | 1.00 | 0.99 | 0.99 | 0.98 | 0.97 | 0.95 | 0.94 | 0.91 | 0.89 | 0.83 | 0.76 | 0.69 | 0.63 | 0.57 | 0.46 | 0.37 |
| Canada  | G2526     | 1              | 1.00 | 0.99 | 0.99 | 0.98 | 0.96 | 0.94 | 0.92 | 0.89 | 0.85 | 0.81 | 0.74 | 0.67 | 0.61 | 0.56 | 0.53 | 0.46 | 0.39 |
| Canada  | G2527     | 1              | 0.99 | 0.97 | 0.92 | 0.86 | 0.79 | 0.70 | 0.64 | 0.61 | 0.58 | 0.53 | 0.46 | 0.41 | 0.38 | 0.35 | 0.35 | 0.32 | 0.28 |
| Canada  | G2532     | 1              | 1.00 | 1.00 | 0.99 | 0.98 | 0.95 | 0.92 | 0.89 | 0.85 | 0.81 | 0.77 | 0.72 | 0.68 | 0.63 | 0.59 | 0.57 | 0.52 | 0.51 |
| Canada  | G2533     | 1              | 0.99 | 0.99 | 0.96 | 0.91 | 0.84 | 0.76 | 0.68 | 0.62 | 0.58 | 0.54 | 0.49 | 0.43 | 0.38 | 0.36 | 0.32 | 0.25 | 0.22 |
| Canada  | G2534     | 1              | 1.00 | 1.00 | 1.00 | 1.00 | 1.00 | 0.99 | 0.99 | 0.99 | 0.99 | 0.98 | 0.97 | 0.96 | 0.95 | 0.93 | 0.92 | 0.88 | 0.84 |
| Canada  | G2535     | 1              | 1.00 | 1.00 | 0.99 | 0.99 | 0.98 | 0.97 | 0.96 | 0.95 | 0.94 | 0.93 | 0.91 | 0.89 | 0.87 | 0.86 | 0.84 | 0.81 | 0.78 |
| Canada  | G2543     | 1              | 0.90 | 0.75 | 0.67 | 0.61 | 0.56 | 0.52 | 0.49 | 0.45 | 0.42 | 0.40 | 0.37 | 0.33 | 0.29 | 0.23 | 0.21 | 0.18 | 0.14 |
| Canada  | G2544     | 1              | 0.99 | 0.97 | 0.93 | 0.86 | 0.80 | 0.74 | 0.68 | 0.63 | 0.59 | 0.56 | 0.51 | 0.49 | 0.46 | 0.44 | 0.41 | 0.37 | 0.32 |
| Canada  | G2545     | 1              | 1.00 | 0.99 | 0.98 | 0.97 | 0.94 | 0.91 | 0.87 | 0.84 | 0.80 | 0.77 | 0.72 | 0.69 | 0.66 | 0.61 | 0.56 | 0.51 | 0.53 |
| Canada  | G2552     | 1              | 0.99 | 0.96 | 0.87 | 0.76 | 0.66 | 0.58 | 0.53 | 0.47 | 0.43 | 0.40 | 0.36 | 0.34 | 0.32 | 0.35 | 0.38 | 0.36 | 0.32 |
| Canada  | G2553     | 1              | 0.99 | 0.97 | 0.93 | 0.87 | 0.81 | 0.75 | 0.69 | 0.64 | 0.60 | 0.57 | 0.52 | 0.50 | 0.47 | 0.44 | 0.41 | 0.37 | 0.32 |

| Country | GloFAS ID | Station filter | LT1  | LT2  | LT3   | LT4   | LT5   | LT6   | LT7   | LT8   | LT9   | LT10  | LT12  | LT14  | LT16  | LT18  | LT20  | LT25  | L30   |
|---------|-----------|----------------|------|------|-------|-------|-------|-------|-------|-------|-------|-------|-------|-------|-------|-------|-------|-------|-------|
| Canada  | G2554     | 1              | 1.00 | 1.00 | 0.99  | 0.98  | 0.97  | 0.95  | 0.93  | 0.91  | 0.88  | 0.86  | 0.83  | 0.77  | 0.72  | 0.69  | 0.66  | 0.56  | 0.47  |
| Canada  | G2555     | 1              | 1.00 | 1.00 | 0.99  | 0.98  | 0.97  | 0.96  | 0.95  | 0.94  | 0.92  | 0.91  | 0.89  | 0.87  | 0.85  | 0.84  | 0.82  | 0.76  | 0.70  |
| Canada  | G2567     | 1              | 0.98 | 0.88 | 0.72  | 0.55  | 0.38  | 0.26  | 0.17  | 0.10  | 0.05  | 0.01  | -0.06 | -0.09 | -0.11 | -0.17 | -0.24 | -0.35 | -0.38 |
| Canada  | G2568     | 1              | 0.98 | 0.89 | 0.77  | 0.65  | 0.57  | 0.50  | 0.44  | 0.41  | 0.37  | 0.37  | 0.37  | 0.34  | 0.29  | 0.30  | 0.27  | 0.26  | 0.22  |
| Canada  | G2579     | 1              | 1.00 | 0.98 | 0.93  | 0.85  | 0.76  | 0.65  | 0.51  | 0.38  | 0.27  | 0.17  | 0.02  | -0.08 | -0.15 | -0.21 | -0.26 | -0.38 | -0.46 |
| Canada  | G2580     | 1              | 0.99 | 0.97 | 0.92  | 0.87  | 0.81  | 0.77  | 0.73  | 0.68  | 0.64  | 0.61  | 0.55  | 0.50  | 0.46  | 0.42  | 0.40  | 0.34  | 0.32  |
| Canada  | G2617     | 1              | 1.00 | 0.98 | 0.95  | 0.91  | 0.86  | 0.82  | 0.79  | 0.77  | 0.75  | 0.72  | 0.67  | 0.62  | 0.57  | 0.53  | 0.48  | 0.42  | 0.41  |
| Canada  | G2618     | 1              | 0.97 | 0.87 | 0.75  | 0.64  | 0.53  | 0.45  | 0.40  | 0.36  | 0.33  | 0.29  | 0.24  | 0.25  | 0.24  | 0.22  | 0.19  | 0.20  | 0.20  |
| Canada  | G2627     | 1              | 0.89 | 0.79 | 0.75  | 0.72  | 0.70  | 0.68  | 0.67  | 0.65  | 0.64  | 0.63  | 0.62  | 0.61  | 0.57  | 0.50  | 0.48  | 0.45  | 0.42  |
| Canada  | G2628     | 1              | 1.00 | 0.99 | 0.98  | 0.97  | 0.95  | 0.92  | 0.89  | 0.86  | 0.83  | 0.80  | 0.74  | 0.69  | 0.64  | 0.58  | 0.53  | 0.44  | 0.43  |
| Canada  | G2629     | 1              | 1.00 | 0.99 | 0.98  | 0.97  | 0.95  | 0.93  | 0.90  | 0.88  | 0.85  | 0.83  | 0.78  | 0.73  | 0.69  | 0.65  | 0.61  | 0.52  | 0.45  |
| Canada  | G2644     | 1              | 1.00 | 0.95 | 0.86  | 0.78  | 0.74  | 0.70  | 0.68  | 0.66  | 0.64  | 0.62  | 0.59  | 0.58  | 0.56  | 0.50  | 0.44  | 0.37  | 0.35  |
| Canada  | G2645     | 1              | 0.93 | 0.85 | 0.81  | 0.78  | 0.76  | 0.74  | 0.72  | 0.71  | 0.69  | 0.68  | 0.66  | 0.65  | 0.62  | 0.55  | 0.54  | 0.51  | 0.48  |
| Canada  | G2658     | 1              | 0.98 | 0.95 | 0.93  | 0.92  | 0.90  | 0.90  | 0.89  | 0.89  | 0.88  | 0.88  | 0.85  | 0.83  | 0.81  | 0.79  | 0.76  | 0.70  | 0.66  |
| Canada  | G2659     | 1              | 0.79 | 0.41 | 0.22  | 0.07  | -0.04 | -0.03 | -0.07 | -0.15 | -0.13 | -0.09 | -0.24 | -0.31 | -0.34 | -0.31 | -0.31 | -0.38 | -0.29 |
| Canada  | G2670     | 1              | 0.97 | 0.93 | 0.91  | 0.89  | 0.87  | 0.86  | 0.85  | 0.84  | 0.83  | 0.82  | 0.81  | 0.80  | 0.79  | 0.76  | 0.74  | 0.71  | 0.69  |
| Canada  | G2671     | 1              | 1.00 | 0.97 | 0.91  | 0.84  | 0.72  | 0.57  | 0.40  | 0.25  | 0.12  | 0.02  | -0.15 | -0.27 | -0.34 | -0.40 | -0.45 | -0.58 | -0.68 |
| Canada  | G2672     | 1              | 0.98 | 0.94 | 0.91  | 0.89  | 0.86  | 0.85  | 0.83  | 0.81  | 0.80  | 0.79  | 0.76  | 0.75  | 0.73  | 0.72  | 0.71  | 0.70  | 0.68  |
| Canada  | G2678     | 1              | 1.00 | 0.99 | 0.97  | 0.92  | 0.81  | 0.65  | 0.47  | 0.31  | 0.17  | 0.05  | -0.14 | -0.28 | -0.39 | -0.48 | -0.59 | -0.77 | -0.92 |
| Canada  | G2684     | 1              | 0.56 | 0.03 | -0.36 | -0.62 | -0.86 | -0.89 | -0.92 | -1.11 | -1.19 | -1.21 | -1.42 | -1.52 | -1.71 | -1.55 | -1.54 | -1.48 | -1.44 |
| Canada  | G2693     | 1              | 0.66 | 0.28 | 0.04  | -0.05 | -0.15 | -0.20 | -0.18 | -0.18 | -0.16 | -0.16 | -0.20 | -0.24 | -0.17 | -0.13 | -0.18 | -0.23 | -0.20 |
| Canada  | G2697     | 1              | 0.99 | 0.98 | 0.93  | 0.83  | 0.63  | 0.39  | 0.20  | 0.06  | -0.05 | -0.13 | -0.25 | -0.33 | -0.39 | -0.48 | -0.61 | -0.74 | -0.78 |
| Canada  | G2700     | 1              | 1.00 | 0.97 | 0.89  | 0.71  | 0.45  | 0.23  | 0.06  | -0.07 | -0.17 | -0.24 | -0.35 | -0.42 | -0.48 | -0.61 | -0.73 | -0.85 | -0.88 |
| Canada  | G2701     | 1              | 0.99 | 0.97 | 0.92  | 0.85  | 0.79  | 0.73  | 0.68  | 0.63  | 0.59  | 0.57  | 0.52  | 0.50  | 0.47  | 0.44  | 0.41  | 0.37  | 0.33  |
| Canada  | G2702     | 1              | 0.99 | 0.97 | 0.93  | 0.90  | 0.88  | 0.86  | 0.84  | 0.82  | 0.80  | 0.79  | 0.76  | 0.73  | 0.71  | 0.70  | 0.69  | 0.65  | 0.61  |
| Canada  | G2703     | 1              | 0.91 | 0.78 | 0.68  | 0.60  | 0.53  | 0.50  | 0.47  | 0.42  | 0.38  | 0.34  | 0.21  | 0.09  | -0.03 | -0.12 | -0.21 | -0.39 | -0.50 |
| Canada  | G2708     | 1              | 0.99 | 0.92 | 0.80  | 0.66  | 0.51  | 0.40  | 0.33  | 0.27  | 0.22  | 0.20  | 0.15  | 0.13  | 0.10  | 0.14  | 0.20  | 0.22  | 0.21  |
| Canada  | G2709     | 1              | 0.99 | 0.96 | 0.87  | 0.74  | 0.62  | 0.50  | 0.37  | 0.25  | 0.14  | 0.03  | -0.14 | -0.28 | -0.39 | -0.50 | -0.59 | -0.78 | -0.98 |
| Canada  | G2716     | 1              | 0.92 | 0.69 | 0.50  | 0.35  | 0.23  | 0.15  | 0.10  | 0.06  | 0.04  | 0.02  | -0.01 | -0.03 | -0.01 | 0.09  | -0.01 | -0.07 | -0.07 |
| Canada  | G2723     | 1              | 1.00 | 0.99 | 0.97  | 0.95  | 0.92  | 0.88  | 0.83  | 0.78  | 0.71  | 0.64  | 0.57  | 0.53  | 0.48  | 0.43  | 0.39  | 0.35  | 0.35  |
| Canada  | G2724     | 1              | 1.00 | 0.99 | 0.99  | 0.98  | 0.96  | 0.95  | 0.94  | 0.92  | 0.89  | 0.87  | 0.81  | 0.76  | 0.72  | 0.69  | 0.65  | 0.56  | 0.50  |
| Canada  | G2735     | 1              | 0.96 | 0.84 | 0.69  | 0.50  | 0.36  | 0.29  | 0.22  | 0.17  | 0.14  | 0.12  | 0.08  | 0.06  | 0.04  | 0.08  | 0.11  | 0.11  | 0.11  |
| Canada  | G2736     | 1              | 0.98 | 0.91 | 0.82  | 0.70  | 0.57  | 0.46  | 0.38  | 0.33  | 0.28  | 0.26  | 0.21  | 0.18  | 0.16  | 0.18  | 0.20  | 0.22  | 0.20  |
| Canada  | G2737     | 1              | 0.95 | 0.80 | 0.63  | 0.51  | 0.43  | 0.40  | 0.41  | 0.40  | 0.36  | 0.34  | 0.30  | 0.24  | 0.23  | 0.26  | 0.23  | 0.19  | 0.20  |
| Canada  | G2738     | 1              | 1.00 | 0.99 | 0.99  | 0.98  | 0.96  | 0.95  | 0.94  | 0.93  | 0.92  | 0.90  | 0.87  | 0.83  | 0.80  | 0.77  | 0.75  | 0.69  | 0.65  |
| Canada  | G2746     | 1              | 1.00 | 0.98 | 0.93  | 0.87  | 0.81  | 0.75  | 0.70  | 0.65  | 0.61  | 0.58  | 0.54  | 0.52  | 0.49  | 0.46  | 0.43  | 0.39  | 0.35  |
| Canada  | G2747     | 1              | 0.92 | 0.59 | 0.25  | 0.04  | -0.06 | -0.13 | -0.16 | -0.17 | -0.18 | -0.18 | -0.23 | -0.31 | -0.24 | -0.21 | -0.23 | -0.26 | -0.19 |
| Canada  | G2748     | 1              | 0.96 | 0.88 | 0.77  | 0.67  | 0.58  | 0.54  | 0.53  | 0.50  | 0.49  | 0.49  | 0.47  | 0.45  | 0.43  | 0.42  | 0.43  | 0.45  | 0.49  |
| Canada  | G2749     | 1              | 1.00 | 0.98 | 0.95  | 0.90  | 0.81  | 0.72  | 0.64  | 0.55  | 0.47  | 0.41  | 0.30  | 0.24  | 0.19  | 0.16  | 0.11  | 0.05  | 0.06  |

| Country | GloFAS ID | Station filter | LT1  | LT2  | LT3  | LT4  | LT5   | LT6   | LT7   | LT8   | LT9   | LT10  | LT12  | LT14  | LT16  | LT18  | LT20  | LT25  | L30   |
|---------|-----------|----------------|------|------|------|------|-------|-------|-------|-------|-------|-------|-------|-------|-------|-------|-------|-------|-------|
| Canada  | G2757     | 1              | 0.88 | 0.69 | 0.50 | 0.36 | 0.25  | 0.17  | 0.10  | 0.05  | 0.01  | -0.02 | -0.08 | -0.14 | -0.20 | -0.27 | -0.33 | -0.46 | -0.55 |
| Canada  | G2758     | 1              | 0.99 | 0.94 | 0.83 | 0.71 | 0.60  | 0.48  | 0.35  | 0.24  | 0.12  | 0.02  | -0.15 | -0.28 | -0.40 | -0.50 | -0.57 | -0.76 | -0.96 |
| Canada  | G2761     | 1              | 0.98 | 0.84 | 0.61 | 0.42 | 0.27  | 0.16  | 0.07  | 0.00  | -0.05 | -0.10 | -0.16 | -0.21 | -0.25 | -0.24 | -0.24 | -0.28 | -0.34 |
| Canada  | G2762     | 1              | 0.86 | 0.69 | 0.53 | 0.39 | 0.30  | 0.23  | 0.15  | 0.10  | 0.05  | 0.01  | -0.05 | -0.09 | -0.11 | -0.14 | -0.14 | -0.15 | -0.14 |
| Canada  | G2763     | 1              | 0.99 | 0.96 | 0.91 | 0.84 | 0.78  | 0.72  | 0.66  | 0.60  | 0.55  | 0.51  | 0.42  | 0.35  | 0.32  | 0.28  | 0.22  | 0.17  | 0.15  |
| Canada  | G2774     | 1              | 0.95 | 0.72 | 0.37 | 0.09 | -0.12 | -0.29 | -0.43 | -0.54 | -0.63 | -0.72 | -0.84 | -0.94 | -1.02 | -1.06 | -1.06 | -1.07 | -1.09 |
| Canada  | G2775     | 1              | 0.98 | 0.87 | 0.61 | 0.34 | 0.14  | -0.01 | -0.13 | -0.23 | -0.31 | -0.37 | -0.46 | -0.53 | -0.59 | -0.75 | -0.88 | -1.01 | -1.04 |
| Canada  | G2786     | 1              | 0.99 | 0.97 | 0.93 | 0.87 | 0.79  | 0.70  | 0.59  | 0.48  | 0.37  | 0.27  | 0.10  | -0.03 | -0.15 | -0.26 | -0.36 | -0.59 | -0.84 |
| Canada  | G2787     | 1              | 0.99 | 0.97 | 0.93 | 0.88 | 0.81  | 0.73  | 0.67  | 0.62  | 0.56  | 0.52  | 0.44  | 0.38  | 0.32  | 0.30  | 0.27  | 0.21  | 0.17  |
| Canada  | G2815     | 1              | 0.90 | 0.76 | 0.68 | 0.64 | 0.61  | 0.57  | 0.54  | 0.50  | 0.47  | 0.44  | 0.43  | 0.38  | 0.33  | 0.21  | 0.18  | 0.14  | 0.10  |
| Canada  | G2820     | 1              | 0.91 | 0.72 | 0.55 | 0.45 | 0.38  | 0.32  | 0.27  | 0.25  | 0.24  | 0.20  | 0.22  | 0.18  | 0.19  | 0.11  | 0.06  | 0.03  | 0.01  |
| Canada  | G2821     | 1              | 0.99 | 0.97 | 0.94 | 0.88 | 0.81  | 0.75  | 0.69  | 0.64  | 0.59  | 0.55  | 0.48  | 0.43  | 0.39  | 0.36  | 0.33  | 0.27  | 0.24  |
| Canada  | G2826     | 1              | 1.00 | 1.00 | 0.99 | 0.99 | 0.99  | 0.99  | 0.98  | 0.98  | 0.98  | 0.97  | 0.96  | 0.95  | 0.94  | 0.93  | 0.92  | 0.89  | 0.86  |
| Canada  | G2827     | 1              | 1.00 | 1.00 | 1.00 | 1.00 | 0.99  | 0.99  | 0.99  | 0.98  | 0.98  | 0.97  | 0.96  | 0.95  | 0.94  | 0.93  | 0.92  | 0.89  | 0.85  |
| Canada  | G2828     | 1              | 1.00 | 1.00 | 0.99 | 0.98 | 0.97  | 0.95  | 0.93  | 0.92  | 0.91  | 0.90  | 0.87  | 0.84  | 0.81  | 0.78  | 0.75  | 0.68  | 0.62  |
| Canada  | G2829     | 1              | 1.00 | 0.99 | 0.98 | 0.96 | 0.94  | 0.92  | 0.90  | 0.89  | 0.87  | 0.86  | 0.83  | 0.80  | 0.77  | 0.74  | 0.72  | 0.70  | 0.69  |
| Canada  | G2830     | 1              | 0.98 | 0.89 | 0.78 | 0.66 | 0.56  | 0.49  | 0.43  | 0.37  | 0.33  | 0.31  | 0.23  | 0.17  | 0.14  | 0.14  | 0.11  | 0.09  | 0.08  |
| Canada  | G2836     | 1              | 0.96 | 0.91 | 0.84 | 0.80 | 0.77  | 0.76  | 0.73  | 0.70  | 0.70  | 0.67  | 0.62  | 0.60  | 0.61  | 0.57  | 0.55  | 0.51  | 0.52  |
| Canada  | G2853     | 1              | 0.93 | 0.75 | 0.58 | 0.48 | 0.41  | 0.36  | 0.31  | 0.29  | 0.27  | 0.24  | 0.23  | 0.21  | 0.20  | 0.12  | 0.11  | 0.08  | 0.04  |
| Canada  | G2854     | 1              | 0.98 | 0.94 | 0.90 | 0.85 | 0.80  | 0.76  | 0.73  | 0.69  | 0.65  | 0.62  | 0.56  | 0.52  | 0.48  | 0.47  | 0.45  | 0.43  | 0.40  |
| Canada  | G2862     | 1              | 0.98 | 0.92 | 0.83 | 0.73 | 0.64  | 0.54  | 0.45  | 0.38  | 0.32  | 0.27  | 0.21  | 0.17  | 0.13  | 0.09  | 0.05  | 0.00  | -0.04 |
| Canada  | G2870     | 1              | 0.97 | 0.95 | 0.92 | 0.89 | 0.86  | 0.83  | 0.80  | 0.77  | 0.74  | 0.70  | 0.63  | 0.56  | 0.48  | 0.38  | 0.27  | -0.04 | -0.34 |
| Canada  | G2871     | 1              | 0.94 | 0.87 | 0.81 | 0.74 | 0.69  | 0.66  | 0.61  | 0.58  | 0.55  | 0.54  | 0.52  | 0.50  | 0.49  | 0.52  | 0.52  | 0.48  | 0.44  |
| Canada  | G2875     | 1              | 1.00 | 0.99 | 0.99 | 0.98 | 0.97  | 0.95  | 0.94  | 0.92  | 0.91  | 0.89  | 0.85  | 0.82  | 0.78  | 0.75  | 0.71  | 0.64  | 0.54  |
| Canada  | G2880     | 1              | 0.91 | 0.79 | 0.67 | 0.54 | 0.46  | 0.38  | 0.29  | 0.19  | 0.14  | 0.09  | 0.02  | -0.05 | -0.08 | -0.10 | -0.08 | -0.09 | -0.08 |
| Canada  | G2911     | 1              | 1.00 | 0.98 | 0.89 | 0.71 | 0.50  | 0.30  | 0.14  | 0.03  | -0.04 | -0.10 | -0.17 | -0.21 | -0.24 | -0.25 | -0.25 | -0.23 | -0.22 |
| Canada  | G2919     | 1              | 0.99 | 0.96 | 0.93 | 0.89 | 0.83  | 0.77  | 0.72  | 0.68  | 0.65  | 0.63  | 0.59  | 0.55  | 0.54  | 0.52  | 0.51  | 0.46  | 0.43  |
| Canada  | G2920     | 1              | 0.99 | 0.96 | 0.88 | 0.79 | 0.72  | 0.68  | 0.65  | 0.63  | 0.62  | 0.61  | 0.58  | 0.56  | 0.56  | 0.54  | 0.50  | 0.44  | 0.39  |
| Canada  | G2924     | 1              | 0.97 | 0.77 | 0.47 | 0.25 | 0.07  | -0.08 | -0.19 | -0.29 | -0.36 | -0.43 | -0.51 | -0.57 | -0.62 | -0.61 | -0.61 | -0.61 | -0.62 |
| Canada  | G2925     | 1              | 0.99 | 0.95 | 0.91 | 0.86 | 0.82  | 0.77  | 0.73  | 0.70  | 0.68  | 0.66  | 0.63  | 0.60  | 0.59  | 0.57  | 0.56  | 0.52  | 0.50  |
| Canada  | G2926     | 1              | 0.99 | 0.97 | 0.94 | 0.89 | 0.83  | 0.79  | 0.76  | 0.74  | 0.72  | 0.71  | 0.67  | 0.65  | 0.63  | 0.62  | 0.59  | 0.54  | 0.50  |
| Canada  | G2927     | 1              | 1.00 | 0.99 | 0.97 | 0.94 | 0.91  | 0.88  | 0.85  | 0.82  | 0.80  | 0.78  | 0.76  | 0.73  | 0.71  | 0.69  | 0.67  | 0.60  | 0.55  |
| Canada  | G2931     | 1              | 1.00 | 0.99 | 0.94 | 0.81 | 0.61  | 0.39  | 0.19  | 0.04  | -0.07 | -0.15 | -0.25 | -0.31 | -0.35 | -0.38 | -0.40 | -0.41 | -0.40 |
| Canada  | G2932     | 1              | 0.91 | 0.80 | 0.73 | 0.69 | 0.65  | 0.62  | 0.59  | 0.57  | 0.56  | 0.53  | 0.51  | 0.46  | 0.42  | 0.36  | 0.32  | 0.27  | 0.21  |
| Canada  | G2938     | 1              | 0.98 | 0.95 | 0.89 | 0.79 | 0.65  | 0.48  | 0.34  | 0.22  | 0.14  | 0.08  | -0.01 | -0.07 | -0.11 | -0.14 | -0.17 | -0.20 | -0.23 |
| Canada  | G2939     | 1              | 0.99 | 0.97 | 0.94 | 0.91 | 0.89  | 0.88  | 0.86  | 0.85  | 0.84  | 0.84  | 0.82  | 0.80  | 0.79  | 0.77  | 0.75  | 0.70  | 0.65  |
| Canada  | G2944     | 1              | 0.95 | 0.90 | 0.84 | 0.80 | 0.76  | 0.73  | 0.69  | 0.66  | 0.63  | 0.60  | 0.56  | 0.51  | 0.46  | 0.40  | 0.35  | 0.24  | 0.16  |
| Canada  | G2945     | 1              | 0.97 | 0.89 | 0.81 | 0.73 | 0.64  | 0.54  | 0.44  | 0.37  | 0.31  | 0.26  | 0.20  | 0.15  | 0.12  | 0.06  | 0.03  | -0.02 | -0.06 |
| Canada  | G2946     | 1              | 0.98 | 0.80 | 0.55 | 0.38 | 0.26  | 0.18  | 0.11  | 0.07  | 0.03  | 0.00  | -0.03 | -0.06 | -0.09 | -0.03 | -0.02 | -0.05 | -0.10 |

| Country | GloFAS ID | Station filter | LT1  | LT2  | LT3  | LT4  | LT5  | LT6  | LT7  | LT8   | LT9   | LT10  | LT12  | LT14  | LT16  | LT18  | LT20  | LT25  | L30   |
|---------|-----------|----------------|------|------|------|------|------|------|------|-------|-------|-------|-------|-------|-------|-------|-------|-------|-------|
| Canada  | G2952     | 1              | 0.96 | 0.90 | 0.84 | 0.77 | 0.67 | 0.57 | 0.46 | 0.38  | 0.32  | 0.27  | 0.20  | 0.15  | 0.11  | 0.06  | 0.02  | -0.03 | -0.07 |
| Canada  | G2961     | 1              | 0.96 | 0.85 | 0.71 | 0.57 | 0.45 | 0.34 | 0.25 | 0.17  | 0.10  | 0.03  | -0.07 | -0.15 | -0.24 | -0.36 | -0.51 | -0.85 | -1.04 |
| Canada  | G2962     | 1              | 0.97 | 0.89 | 0.79 | 0.69 | 0.60 | 0.51 | 0.41 | 0.33  | 0.28  | 0.23  | 0.17  | 0.12  | 0.09  | 0.04  | 0.02  | -0.04 | -0.08 |
| Canada  | G2969     | 1              | 0.92 | 0.67 | 0.42 | 0.25 | 0.15 | 0.09 | 0.03 | -0.04 | -0.09 | -0.14 | -0.23 | -0.33 | -0.46 | -0.97 | -1.31 | -1.64 | -1.72 |
| Canada  | G2970     | 1              | 1.00 | 0.97 | 0.92 | 0.85 | 0.78 | 0.71 | 0.66 | 0.61  | 0.57  | 0.54  | 0.49  | 0.45  | 0.42  | 0.40  | 0.37  | 0.34  | 0.30  |
| Canada  | G2976     | 1              | 0.97 | 0.96 | 0.94 | 0.93 | 0.92 | 0.92 | 0.91 | 0.90  | 0.90  | 0.90  | 0.89  | 0.89  | 0.89  | 0.89  | 0.88  | 0.87  | 0.86  |
| Canada  | G2981     | 1              | 0.86 | 0.75 | 0.63 | 0.54 | 0.48 | 0.44 | 0.39 | 0.37  | 0.35  | 0.32  | 0.30  | 0.29  | 0.30  | 0.26  | 0.25  | 0.20  | 0.20  |
| Canada  | G2982     | 1              | 0.99 | 0.98 | 0.97 | 0.97 | 0.96 | 0.96 | 0.96 | 0.95  | 0.95  | 0.95  | 0.95  | 0.94  | 0.94  | 0.94  | 0.93  | 0.92  | 0.91  |
| Canada  | G2983     | 1              | 0.99 | 0.99 | 0.99 | 0.99 | 0.98 | 0.98 | 0.98 | 0.98  | 0.98  | 0.98  | 0.97  | 0.97  | 0.97  | 0.96  | 0.96  | 0.95  | 0.94  |
| Canada  | G2991     | 1              | 1.00 | 1.00 | 1.00 | 1.00 | 0.99 | 0.99 | 0.98 | 0.98  | 0.97  | 0.96  | 0.95  | 0.94  | 0.94  | 0.93  | 0.92  | 0.90  | 0.88  |
| Canada  | G2997     | 1              | 1.00 | 0.99 | 0.98 | 0.97 | 0.96 | 0.95 | 0.93 | 0.92  | 0.91  | 0.90  | 0.88  | 0.86  | 0.85  | 0.84  | 0.84  | 0.81  | 0.78  |
| Canada  | G2998     | 1              | 1.00 | 1.00 | 1.00 | 1.00 | 0.99 | 0.99 | 0.98 | 0.97  | 0.96  | 0.95  | 0.93  | 0.91  | 0.90  | 0.89  | 0.88  | 0.85  | 0.83  |
| Canada  | G3006     | 1              | 0.95 | 0.86 | 0.74 | 0.65 | 0.59 | 0.56 | 0.54 | 0.51  | 0.50  | 0.50  | 0.48  | 0.48  | 0.47  | 0.47  | 0.45  | 0.42  | 0.39  |
| Canada  | G3013     | 1              | 1.00 | 1.00 | 1.00 | 0.99 | 0.98 | 0.98 | 0.97 | 0.96  | 0.95  | 0.95  | 0.93  | 0.92  | 0.90  | 0.89  | 0.88  | 0.85  | 0.82  |
| Canada  | G3014     | 1              | 1.00 | 0.99 | 0.98 | 0.97 | 0.96 | 0.94 | 0.92 | 0.91  | 0.88  | 0.86  | 0.82  | 0.77  | 0.72  | 0.68  | 0.63  | 0.54  | 0.46  |
| Canada  | G3030     | 1              | 0.97 | 0.91 | 0.85 | 0.81 | 0.78 | 0.74 | 0.70 | 0.67  | 0.64  | 0.62  | 0.58  | 0.57  | 0.57  | 0.56  | 0.57  | 0.56  | 0.55  |
| Canada  | G3031     | 1              | 0.96 | 0.90 | 0.85 | 0.81 | 0.77 | 0.72 | 0.67 | 0.62  | 0.58  | 0.55  | 0.51  | 0.46  | 0.43  | 0.42  | 0.40  | 0.35  | 0.31  |
| Canada  | G3051     | 1              | 0.96 | 0.91 | 0.85 | 0.81 | 0.79 | 0.74 | 0.71 | 0.69  | 0.66  | 0.63  | 0.58  | 0.56  | 0.55  | 0.51  | 0.49  | 0.45  | 0.43  |
| Canada  | G3056     | 1              | 1.00 | 0.99 | 0.98 | 0.95 | 0.92 | 0.87 | 0.82 | 0.78  | 0.75  | 0.72  | 0.68  | 0.64  | 0.62  | 0.61  | 0.59  | 0.56  | 0.54  |
| Canada  | G3057     | 1              | 1.00 | 0.99 | 0.98 | 0.95 | 0.92 | 0.87 | 0.82 | 0.78  | 0.75  | 0.72  | 0.67  | 0.64  | 0.62  | 0.60  | 0.59  | 0.56  | 0.54  |
| Canada  | G3063     | 1              | 0.96 | 0.89 | 0.78 | 0.67 | 0.60 | 0.52 | 0.45 | 0.40  | 0.37  | 0.34  | 0.28  | 0.23  | 0.22  | 0.19  | 0.13  | 0.06  | 0.03  |
| Canada  | G3064     | 1              | 1.00 | 0.99 | 0.98 | 0.97 | 0.95 | 0.93 | 0.92 | 0.89  | 0.87  | 0.84  | 0.79  | 0.75  | 0.72  | 0.68  | 0.66  | 0.62  | 0.60  |
| Canada  | G3072     | 1              | 0.98 | 0.92 | 0.81 | 0.71 | 0.64 | 0.59 | 0.53 | 0.49  | 0.46  | 0.44  | 0.39  | 0.37  | 0.35  | 0.36  | 0.37  | 0.36  | 0.32  |
| Canada  | G3102     | 1              | 0.99 | 0.98 | 0.96 | 0.94 | 0.92 | 0.90 | 0.87 | 0.85  | 0.82  | 0.80  | 0.74  | 0.69  | 0.63  | 0.58  | 0.53  | 0.47  | 0.42  |
| Canada  | G3103     | 1              | 1.00 | 1.00 | 0.99 | 0.98 | 0.97 | 0.95 | 0.92 | 0.88  | 0.83  | 0.77  | 0.68  | 0.62  | 0.59  | 0.58  | 0.56  | 0.52  | 0.48  |
| Canada  | G3115     | 1              | 0.93 | 0.83 | 0.74 | 0.68 | 0.64 | 0.62 | 0.60 | 0.59  | 0.57  | 0.55  | 0.52  | 0.49  | 0.46  | 0.44  | 0.40  | 0.35  | 0.33  |
| Canada  | G3117     | 1              | 0.96 | 0.88 | 0.80 | 0.73 | 0.68 | 0.62 | 0.57 | 0.54  | 0.52  | 0.49  | 0.44  | 0.40  | 0.39  | 0.38  | 0.38  | 0.35  | 0.34  |
| Canada  | G3118     | 1              | 0.98 | 0.95 | 0.89 | 0.85 | 0.81 | 0.79 | 0.77 | 0.76  | 0.75  | 0.74  | 0.73  | 0.72  | 0.70  | 0.68  | 0.66  | 0.60  | 0.53  |
| Canada  | G3127     | 1              | 1.00 | 0.99 | 0.96 | 0.92 | 0.87 | 0.82 | 0.79 | 0.76  | 0.73  | 0.71  | 0.68  | 0.65  | 0.63  | 0.62  | 0.60  | 0.58  | 0.56  |
| Canada  | G3134     | 1              | 1.00 | 0.98 | 0.96 | 0.94 | 0.91 | 0.87 | 0.84 | 0.81  | 0.78  | 0.75  | 0.71  | 0.67  | 0.65  | 0.64  | 0.62  | 0.60  | 0.58  |
| Canada  | G3135     | 1              | 1.00 | 0.99 | 0.97 | 0.95 | 0.94 | 0.91 | 0.89 | 0.86  | 0.83  | 0.81  | 0.76  | 0.71  | 0.68  | 0.66  | 0.64  | 0.62  | 0.61  |
| Canada  | G3136     | 1              | 0.99 | 0.91 | 0.84 | 0.78 | 0.74 | 0.71 | 0.67 | 0.65  | 0.64  | 0.62  | 0.60  | 0.58  | 0.57  | 0.59  | 0.58  | 0.51  | 0.44  |
| Canada  | G3139     | 1              | 0.97 | 0.78 | 0.60 | 0.49 | 0.42 | 0.37 | 0.34 | 0.33  | 0.33  | 0.33  | 0.32  | 0.32  | 0.32  | 0.47  | 0.47  | 0.40  | 0.34  |
| Canada  | G3147     | 1              | 1.00 | 1.00 | 1.00 | 0.99 | 0.99 | 0.98 | 0.97 | 0.97  | 0.96  | 0.95  | 0.93  | 0.91  | 0.88  | 0.86  | 0.82  | 0.73  | 0.64  |
| Canada  | G3148     | 1              | 0.96 | 0.89 | 0.84 | 0.80 | 0.77 | 0.75 | 0.74 | 0.73  | 0.72  | 0.71  | 0.69  | 0.68  | 0.65  | 0.64  | 0.61  | 0.56  | 0.51  |
| Canada  | G3149     | 1              | 0.99 | 0.96 | 0.90 | 0.85 | 0.81 | 0.78 | 0.76 | 0.75  | 0.74  | 0.73  | 0.71  | 0.70  | 0.69  | 0.67  | 0.64  | 0.58  | 0.51  |
| Canada  | G3177     | 1              | 1.00 | 0.99 | 0.97 | 0.93 | 0.90 | 0.88 | 0.85 | 0.84  | 0.82  | 0.80  | 0.78  | 0.76  | 0.74  | 0.73  | 0.73  | 0.69  | 0.66  |
| Canada  | G3183     | 1              | 1.00 | 1.00 | 1.00 | 1.00 | 1.00 | 1.00 | 0.99 | 0.99  | 0.99  | 0.99  | 0.99  | 0.99  | 0.99  | 0.98  | 0.98  | 0.98  | 0.98  |
| Canada  | G3184     | 1              | 1.00 | 0.99 | 0.99 | 0.98 | 0.97 | 0.96 | 0.95 | 0.93  | 0.92  | 0.91  | 0.88  | 0.85  | 0.83  | 0.80  | 0.78  | 0.71  | 0.62  |

| Country | GloFAS ID | Station filter | LT1  | LT2  | LT3  | LT4  | LT5  | LT6  | LT7  | LT8   | LT9   | LT10  | LT12  | LT14  | LT16  | LT18  | LT20  | LT25  | L30   |
|---------|-----------|----------------|------|------|------|------|------|------|------|-------|-------|-------|-------|-------|-------|-------|-------|-------|-------|
| Canada  | G3190     | 1              | 0.99 | 0.96 | 0.92 | 0.87 | 0.81 | 0.75 | 0.69 | 0.64  | 0.58  | 0.53  | 0.45  | 0.39  | 0.35  | 0.32  | 0.29  | 0.24  | 0.23  |
| Canada  | G3191     | 1              | 1.00 | 1.00 | 0.99 | 0.99 | 0.98 | 0.97 | 0.96 | 0.95  | 0.93  | 0.92  | 0.89  | 0.86  | 0.84  | 0.81  | 0.78  | 0.71  | 0.61  |
| Canada  | G3192     | 1              | 0.99 | 0.96 | 0.94 | 0.92 | 0.90 | 0.88 | 0.86 | 0.85  | 0.84  | 0.83  | 0.80  | 0.78  | 0.75  | 0.73  | 0.70  | 0.63  | 0.57  |
| Canada  | G3199     | 1              | 1.00 | 1.00 | 1.00 | 1.00 | 1.00 | 0.99 | 0.99 | 0.99  | 0.99  | 0.99  | 0.99  | 0.99  | 0.98  | 0.98  | 0.98  | 0.98  | 0.97  |
| Canada  | G3200     | 1              | 0.99 | 0.91 | 0.81 | 0.73 | 0.66 | 0.62 | 0.59 | 0.56  | 0.54  | 0.52  | 0.49  | 0.47  | 0.45  | 0.48  | 0.48  | 0.44  | 0.42  |
| Canada  | G3201     | 1              | 0.99 | 0.93 | 0.88 | 0.84 | 0.80 | 0.78 | 0.76 | 0.74  | 0.72  | 0.71  | 0.69  | 0.67  | 0.65  | 0.66  | 0.64  | 0.59  | 0.55  |
| Canada  | G3208     | 1              | 1.00 | 0.99 | 0.98 | 0.96 | 0.93 | 0.90 | 0.86 | 0.81  | 0.77  | 0.73  | 0.65  | 0.58  | 0.52  | 0.47  | 0.43  | 0.35  | 0.29  |
| Canada  | G3217     | 1              | 1.00 | 0.99 | 0.98 | 0.97 | 0.95 | 0.94 | 0.93 | 0.91  | 0.90  | 0.89  | 0.87  | 0.86  | 0.84  | 0.83  | 0.82  | 0.79  | 0.76  |
| Canada  | G3223     | 1              | 1.00 | 1.00 | 0.99 | 0.99 | 0.98 | 0.97 | 0.96 | 0.94  | 0.92  | 0.90  | 0.86  | 0.81  | 0.76  | 0.70  | 0.65  | 0.53  | 0.43  |
| Canada  | G3233     | 1              | 1.00 | 0.98 | 0.96 | 0.95 | 0.93 | 0.92 | 0.91 | 0.90  | 0.90  | 0.89  | 0.88  | 0.86  | 0.85  | 0.85  | 0.84  | 0.82  | 0.81  |
| Canada  | G3234     | 1              | 1.00 | 0.98 | 0.96 | 0.93 | 0.89 | 0.84 | 0.79 | 0.73  | 0.68  | 0.62  | 0.52  | 0.44  | 0.36  | 0.29  | 0.22  | 0.09  | -0.02 |
| Canada  | G3235     | 1              | 0.99 | 0.98 | 0.97 | 0.96 | 0.95 | 0.94 | 0.92 | 0.91  | 0.91  | 0.90  | 0.88  | 0.87  | 0.86  | 0.85  | 0.84  | 0.82  | 0.80  |
| Canada  | G3238     | 1              | 0.99 | 0.98 | 0.98 | 0.97 | 0.97 | 0.96 | 0.95 | 0.94  | 0.94  | 0.93  | 0.91  | 0.89  | 0.86  | 0.84  | 0.83  | 0.78  | 0.74  |
| Canada  | G3239     | 1              | 0.99 | 0.97 | 0.96 | 0.94 | 0.93 | 0.91 | 0.90 | 0.89  | 0.89  | 0.88  | 0.86  | 0.85  | 0.83  | 0.81  | 0.79  | 0.74  | 0.70  |
| Canada  | G3243     | 1              | 0.99 | 0.98 | 0.96 | 0.95 | 0.94 | 0.93 | 0.92 | 0.91  | 0.90  | 0.89  | 0.86  | 0.84  | 0.81  | 0.79  | 0.76  | 0.68  | 0.59  |
| Canada  | G3244     | 1              | 0.96 | 0.88 | 0.76 | 0.60 | 0.39 | 0.20 | 0.06 | -0.07 | -0.18 | -0.27 | -0.40 | -0.51 | -0.60 | -0.69 | -0.73 | -0.78 | -0.85 |
| Canada  | G3245     | 1              | 0.98 | 0.94 | 0.91 | 0.87 | 0.84 | 0.81 | 0.78 | 0.76  | 0.74  | 0.72  | 0.69  | 0.67  | 0.65  | 0.63  | 0.61  | 0.58  | 0.56  |
| Canada  | G3246     | 1              | 0.97 | 0.91 | 0.83 | 0.74 | 0.68 | 0.64 | 0.60 | 0.57  | 0.54  | 0.53  | 0.50  | 0.48  | 0.45  | 0.26  | 0.11  | -0.01 | -0.03 |
| Canada  | G3247     | 1              | 1.00 | 0.99 | 0.99 | 0.98 | 0.97 | 0.95 | 0.94 | 0.92  | 0.91  | 0.89  | 0.84  | 0.79  | 0.73  | 0.68  | 0.63  | 0.48  | 0.33  |
| Canada  | G3250     | 1              | 0.98 | 0.85 | 0.64 | 0.49 | 0.39 | 0.32 | 0.27 | 0.25  | 0.23  | 0.23  | 0.22  | 0.22  | 0.23  | 0.25  | 0.26  | 0.26  | 0.24  |
| Canada  | G3253     | 1              | 0.97 | 0.91 | 0.85 | 0.79 | 0.75 | 0.71 | 0.67 | 0.64  | 0.61  | 0.58  | 0.53  | 0.49  | 0.45  | 0.40  | 0.36  | 0.27  | 0.19  |
| Canada  | G3254     | 1              | 0.94 | 0.87 | 0.78 | 0.73 | 0.69 | 0.62 | 0.56 | 0.55  | 0.55  | 0.50  | 0.51  | 0.48  | 0.50  | 0.48  | 0.49  | 0.44  | 0.44  |
| Canada  | G3255     | 1              | 0.96 | 0.91 | 0.84 | 0.76 | 0.71 | 0.66 | 0.63 | 0.59  | 0.56  | 0.56  | 0.51  | 0.50  | 0.46  | 0.26  | 0.10  | -0.03 | -0.05 |
| Canada  | G3256     | 1              | 1.00 | 0.99 | 0.98 | 0.96 | 0.93 | 0.90 | 0.87 | 0.83  | 0.80  | 0.76  | 0.69  | 0.61  | 0.54  | 0.47  | 0.43  | 0.32  | 0.17  |
| Canada  | G3259     | 1              | 0.99 | 0.98 | 0.95 | 0.91 | 0.85 | 0.80 | 0.76 | 0.72  | 0.68  | 0.65  | 0.59  | 0.54  | 0.50  | 0.46  | 0.43  | 0.37  | 0.31  |
| Canada  | G3260     | 1              | 1.00 | 1.00 | 0.99 | 0.99 | 0.98 | 0.97 | 0.97 | 0.96  | 0.95  | 0.94  | 0.91  | 0.87  | 0.84  | 0.81  | 0.79  | 0.74  | 0.71  |
| Canada  | G3261     | 1              | 1.00 | 1.00 | 0.99 | 0.98 | 0.97 | 0.94 | 0.89 | 0.84  | 0.80  | 0.75  | 0.68  | 0.63  | 0.59  | 0.55  | 0.50  | 0.38  | 0.28  |
| Canada  | G3262     | 1              | 1.00 | 0.99 | 0.98 | 0.97 | 0.95 | 0.94 | 0.91 | 0.88  | 0.84  | 0.80  | 0.71  | 0.64  | 0.57  | 0.52  | 0.49  | 0.46  | 0.48  |
| Canada  | G3273     | 1              | 1.00 | 0.99 | 0.99 | 0.98 | 0.96 | 0.94 | 0.91 | 0.87  | 0.83  | 0.77  | 0.62  | 0.45  | 0.33  | 0.26  | 0.24  | 0.20  | 0.16  |
| Canada  | G3274     | 1              | 1.00 | 1.00 | 0.99 | 0.99 | 0.99 | 0.98 | 0.97 | 0.96  | 0.94  | 0.93  | 0.89  | 0.84  | 0.77  | 0.69  | 0.64  | 0.54  | 0.48  |
| Canada  | G3278     | 1              | 1.00 | 0.98 | 0.94 | 0.88 | 0.82 | 0.76 | 0.72 | 0.67  | 0.63  | 0.60  | 0.54  | 0.49  | 0.43  | 0.40  | 0.37  | 0.31  | 0.24  |
| Canada  | G3279     | 1              | 1.00 | 0.99 | 0.99 | 0.98 | 0.97 | 0.96 | 0.94 | 0.93  | 0.91  | 0.89  | 0.85  | 0.81  | 0.76  | 0.72  | 0.68  | 0.59  | 0.52  |
| Canada  | G3285     | 1              | 1.00 | 1.00 | 1.00 | 1.00 | 1.00 | 0.99 | 0.99 | 0.99  | 0.98  | 0.98  | 0.97  | 0.97  | 0.96  | 0.96  | 0.95  | 0.95  | 0.94  |
| Canada  | G3300     | 1              | 0.99 | 0.99 | 0.99 | 0.98 | 0.98 | 0.98 | 0.98 | 0.98  | 0.98  | 0.97  | 0.97  | 0.97  | 0.96  | 0.96  | 0.96  | 0.94  | 0.93  |
| Canada  | G3301     | 1              | 0.99 | 0.96 | 0.91 | 0.88 | 0.85 | 0.82 | 0.79 | 0.77  | 0.75  | 0.72  | 0.68  | 0.63  | 0.59  | 0.52  | 0.45  | 0.33  | 0.22  |
| Canada  | G3306     | 1              | 1.00 | 0.97 | 0.91 | 0.84 | 0.77 | 0.72 | 0.67 | 0.63  | 0.59  | 0.55  | 0.49  | 0.44  | 0.38  | 0.35  | 0.33  | 0.27  | 0.19  |
| Canada  | G3309     | 1              | 0.99 | 0.95 | 0.89 | 0.84 | 0.80 | 0.76 | 0.72 | 0.68  | 0.65  | 0.62  | 0.58  | 0.53  | 0.50  | 0.46  | 0.42  | 0.34  | 0.29  |
| Canada  | G3314     | 1              | 1.00 | 1.00 | 1.00 | 1.00 | 1.00 | 0.99 | 0.99 | 0.99  | 0.99  | 0.98  | 0.98  | 0.97  | 0.96  | 0.95  | 0.94  | 0.92  | 0.89  |
| Canada  | G3315     | 1              | 1.00 | 0.99 | 0.99 | 0.98 | 0.98 | 0.97 | 0.97 | 0.96  | 0.96  | 0.95  | 0.94  | 0.94  | 0.93  | 0.93  | 0.92  | 0.90  | 0.89  |

| Country | GloFAS ID | Station filter | LT1  | LT2  | LT3  | LT4  | LT5   | LT6   | LT7   | LT8   | LT9   | LT10  | LT12  | LT14  | LT16  | LT18  | LT20  | LT25  | L30   |
|---------|-----------|----------------|------|------|------|------|-------|-------|-------|-------|-------|-------|-------|-------|-------|-------|-------|-------|-------|
| Canada  | G3322     | 1              | 1.00 | 0.99 | 0.99 | 0.98 | 0.98  | 0.97  | 0.97  | 0.96  | 0.96  | 0.95  | 0.94  | 0.93  | 0.92  | 0.91  | 0.89  | 0.86  | 0.82  |
| Canada  | G3327     | 1              | 1.00 | 0.99 | 0.98 | 0.98 | 0.98  | 0.97  | 0.97  | 0.97  | 0.97  | 0.96  | 0.96  | 0.96  | 0.96  | 0.96  | 0.96  | 0.95  | 0.95  |
| Canada  | G3328     | 1              | 1.00 | 1.00 | 0.99 | 0.99 | 0.99  | 0.98  | 0.98  | 0.97  | 0.97  | 0.97  | 0.96  | 0.95  | 0.94  | 0.93  | 0.92  | 0.89  | 0.86  |
| Canada  | G3335     | 1              | 1.00 | 1.00 | 1.00 | 1.00 | 1.00  | 0.99  | 0.99  | 0.99  | 0.99  | 0.99  | 0.99  | 0.98  | 0.98  | 0.97  | 0.97  | 0.96  | 0.95  |
| Canada  | G3336     | 1              | 1.00 | 1.00 | 0.99 | 0.98 | 0.97  | 0.94  | 0.91  | 0.87  | 0.83  | 0.79  | 0.71  | 0.64  | 0.59  | 0.55  | 0.51  | 0.43  | 0.35  |
| Canada  | G3342     | 1              | 1.00 | 1.00 | 1.00 | 0.99 | 0.99  | 0.98  | 0.97  | 0.97  | 0.96  | 0.95  | 0.92  | 0.90  | 0.87  | 0.84  | 0.81  | 0.74  | 0.69  |
| Canada  | G3352     | 1              | 0.99 | 0.97 | 0.94 | 0.89 | 0.84  | 0.80  | 0.75  | 0.70  | 0.65  | 0.61  | 0.51  | 0.43  | 0.34  | 0.27  | 0.20  | 0.04  | -0.11 |
| Canada  | G3421     | 1              | 0.94 | 0.88 | 0.84 | 0.81 | 0.80  | 0.78  | 0.77  | 0.75  | 0.74  | 0.72  | 0.69  | 0.65  | 0.60  | 0.53  | 0.46  | 0.29  | 0.11  |
| Canada  | G3439     | 1              | 1.00 | 0.98 | 0.94 | 0.87 | 0.77  | 0.68  | 0.60  | 0.55  | 0.50  | 0.46  | 0.39  | 0.32  | 0.26  | 0.20  | 0.16  | 0.06  | -0.02 |
| Canada  | G3446     | 1              | 1.00 | 0.96 | 0.91 | 0.86 | 0.82  | 0.78  | 0.75  | 0.72  | 0.69  | 0.67  | 0.62  | 0.58  | 0.55  | 0.53  | 0.51  | 0.44  | 0.38  |
| Canada  | G3478     | 1              | 1.00 | 1.00 | 0.97 | 0.88 | 0.77  | 0.65  | 0.56  | 0.49  | 0.44  | 0.40  | 0.34  | 0.29  | 0.26  | 0.21  | 0.15  | 0.07  | 0.04  |
| Canada  | G3479     | 1              | 1.00 | 0.99 | 0.98 | 0.95 | 0.91  | 0.85  | 0.78  | 0.71  | 0.65  | 0.59  | 0.50  | 0.44  | 0.40  | 0.38  | 0.36  | 0.35  | 0.33  |
| Canada  | G3482     | 1              | 1.00 | 0.99 | 0.93 | 0.79 | 0.61  | 0.46  | 0.35  | 0.28  | 0.23  | 0.19  | 0.14  | 0.11  | 0.09  | 0.04  | -0.02 | -0.08 | -0.09 |
| Canada  | G3483     | 1              | 1.00 | 0.99 | 0.98 | 0.95 | 0.91  | 0.86  | 0.79  | 0.72  | 0.66  | 0.60  | 0.51  | 0.44  | 0.39  | 0.36  | 0.34  | 0.31  | 0.28  |
| Canada  | G3488     | 1              | 1.00 | 0.94 | 0.80 | 0.62 | 0.48  | 0.37  | 0.30  | 0.25  | 0.21  | 0.18  | 0.14  | 0.11  | 0.09  | 0.05  | 0.01  | -0.05 | -0.09 |
| Canada  | G3489     | 1              | 0.99 | 0.99 | 0.98 | 0.98 | 0.97  | 0.97  | 0.96  | 0.95  | 0.95  | 0.94  | 0.92  | 0.91  | 0.89  | 0.88  | 0.86  | 0.82  | 0.78  |
| Canada  | G3493     | 1              | 1.00 | 0.93 | 0.75 | 0.59 | 0.48  | 0.40  | 0.35  | 0.31  | 0.28  | 0.26  | 0.23  | 0.21  | 0.19  | 0.17  | 0.16  | 0.12  | 0.08  |
| Canada  | G3495     | 1              | 0.94 | 0.72 | 0.34 | 0.02 | -0.16 | -0.26 | -0.33 | -0.38 | -0.41 | -0.42 | -0.44 | -0.44 | -0.44 | -0.45 | -0.44 | -0.46 | -0.45 |
| Canada  | G3498     | 1              | 0.99 | 0.97 | 0.95 | 0.92 | 0.89  | 0.86  | 0.83  | 0.80  | 0.76  | 0.72  | 0.64  | 0.56  | 0.48  | 0.40  | 0.32  | 0.12  | -0.05 |
| Canada  | G3510     | 1              | 1.00 | 1.00 | 0.99 | 0.98 | 0.97  | 0.95  | 0.93  | 0.91  | 0.89  | 0.87  | 0.84  | 0.81  | 0.79  | 0.78  | 0.76  | 0.73  | 0.69  |
| Canada  | G3511     | 1              | 0.92 | 0.84 | 0.79 | 0.76 | 0.73  | 0.70  | 0.66  | 0.62  | 0.60  | 0.60  | 0.57  | 0.55  | 0.54  | 0.54  | 0.53  | 0.53  | 0.49  |
| Canada  | G3521     | 1              | 0.99 | 0.97 | 0.96 | 0.95 | 0.94  | 0.92  | 0.91  | 0.90  | 0.89  | 0.88  | 0.86  | 0.84  | 0.81  | 0.78  | 0.76  | 0.71  | 0.68  |
| Canada  | G3522     | 1              | 1.00 | 1.00 | 0.99 | 0.98 | 0.97  | 0.95  | 0.93  | 0.90  | 0.86  | 0.82  | 0.74  | 0.66  | 0.59  | 0.54  | 0.51  | 0.46  | 0.41  |
| Canada  | G3523     | 1              | 0.99 | 0.85 | 0.65 | 0.52 | 0.43  | 0.37  | 0.33  | 0.30  | 0.27  | 0.26  | 0.23  | 0.22  | 0.20  | 0.18  | 0.17  | 0.13  | 0.09  |
| Canada  | G3554     | 1              | 0.86 | 0.73 | 0.62 | 0.55 | 0.48  | 0.40  | 0.32  | 0.25  | 0.22  | 0.19  | 0.13  | 0.11  | 0.09  | 0.07  | 0.07  | 0.08  | 0.05  |
| Canada  | G3555     | 1              | 1.00 | 1.00 | 0.99 | 0.99 | 0.99  | 0.98  | 0.97  | 0.97  | 0.96  | 0.95  | 0.94  | 0.92  | 0.91  | 0.90  | 0.89  | 0.86  | 0.83  |
| Canada  | G3557     | 1              | 1.00 | 0.98 | 0.95 | 0.91 | 0.87  | 0.84  | 0.81  | 0.78  | 0.75  | 0.73  | 0.68  | 0.64  | 0.61  | 0.58  | 0.57  | 0.52  | 0.47  |
| Canada  | G3559     | 1              | 0.98 | 0.93 | 0.87 | 0.81 | 0.77  | 0.73  | 0.70  | 0.67  | 0.65  | 0.62  | 0.59  | 0.56  | 0.53  | 0.50  | 0.47  | 0.40  | 0.34  |
| Canada  | G3560     | 1              | 1.00 | 1.00 | 0.99 | 0.99 | 0.98  | 0.98  | 0.97  | 0.96  | 0.95  | 0.94  | 0.90  | 0.85  | 0.80  | 0.75  | 0.71  | 0.62  | 0.57  |
| Canada  | G3561     | 1              | 1.00 | 0.98 | 0.96 | 0.95 | 0.93  | 0.91  | 0.89  | 0.87  | 0.86  | 0.84  | 0.80  | 0.77  | 0.73  | 0.69  | 0.65  | 0.55  | 0.46  |
| Canada  | G3567     | 1              | 0.97 | 0.95 | 0.93 | 0.91 | 0.89  | 0.87  | 0.86  | 0.84  | 0.82  | 0.81  | 0.78  | 0.77  | 0.74  | 0.72  | 0.70  | 0.66  | 0.61  |
| Canada  | G3568     | 1              | 1.00 | 0.98 | 0.96 | 0.93 | 0.91  | 0.89  | 0.87  | 0.86  | 0.84  | 0.82  | 0.80  | 0.78  | 0.76  | 0.74  | 0.72  | 0.67  | 0.62  |
| Canada  | G3569     | 1              | 1.00 | 0.99 | 0.97 | 0.93 | 0.90  | 0.85  | 0.81  | 0.76  | 0.71  | 0.68  | 0.62  | 0.58  | 0.55  | 0.54  | 0.53  | 0.49  | 0.45  |
| Canada  | G3589     | 1              | 0.99 | 0.96 | 0.92 | 0.85 | 0.77  | 0.67  | 0.56  | 0.45  | 0.35  | 0.25  | 0.10  | -0.03 | -0.13 | -0.25 | -0.34 | -0.51 | -0.60 |
| Canada  | G3614     | 1              | 1.00 | 0.99 | 0.96 | 0.92 | 0.87  | 0.83  | 0.79  | 0.75  | 0.72  | 0.69  | 0.65  | 0.62  | 0.59  | 0.57  | 0.54  | 0.48  | 0.42  |
| Canada  | G3615     | 1              | 1.00 | 0.99 | 0.98 | 0.96 | 0.94  | 0.92  | 0.89  | 0.85  | 0.82  | 0.78  | 0.69  | 0.60  | 0.52  | 0.45  | 0.39  | 0.27  | 0.17  |
| Canada  | G3627     | 1              | 1.00 | 0.99 | 0.99 | 0.97 | 0.95  | 0.92  | 0.89  | 0.85  | 0.81  | 0.77  | 0.69  | 0.63  | 0.59  | 0.56  | 0.53  | 0.49  | 0.45  |
| Canada  | G3630     | 1              | 1.00 | 0.99 | 0.99 | 0.99 | 0.99  | 0.98  | 0.98  | 0.97  | 0.97  | 0.96  | 0.94  | 0.92  | 0.90  | 0.87  | 0.84  | 0.77  | 0.70  |
| Canada  | G3631     | 1              | 1.00 | 0.99 | 0.98 | 0.97 | 0.95  | 0.92  | 0.88  | 0.83  | 0.77  | 0.71  | 0.59  | 0.50  | 0.41  | 0.34  | 0.27  | 0.16  | 0.12  |

| Country   | GloFAS ID | Station filter | LT1  | LT2  | LT3  | LT4  | LT5  | LT6  | LT7   | LT8   | LT9   | LT10  | LT12  | LT14  | LT16  | LT18  | LT20  | LT25  | L30   |
|-----------|-----------|----------------|------|------|------|------|------|------|-------|-------|-------|-------|-------|-------|-------|-------|-------|-------|-------|
| Canada    | G3632     | 1              | 0.95 | 0.89 | 0.81 | 0.73 | 0.67 | 0.61 | 0.57  | 0.52  | 0.48  | 0.44  | 0.39  | 0.35  | 0.31  | 0.25  | 0.20  | 0.10  | 0.01  |
| Canada    | G3724     | 1              | 1.00 | 1.00 | 0.99 | 0.98 | 0.96 | 0.94 | 0.91  | 0.87  | 0.83  | 0.79  | 0.71  | 0.63  | 0.56  | 0.51  | 0.46  | 0.36  | 0.28  |
| Canada    | G3737     | 1              | 1.00 | 0.99 | 0.96 | 0.92 | 0.86 | 0.78 | 0.71  | 0.63  | 0.56  | 0.49  | 0.37  | 0.26  | 0.18  | 0.11  | 0.05  | -0.05 | -0.12 |
| Canada    | G3741     | 1              | 1.00 | 1.00 | 0.99 | 0.98 | 0.96 | 0.94 | 0.91  | 0.88  | 0.85  | 0.82  | 0.76  | 0.71  | 0.67  | 0.63  | 0.59  | 0.51  | 0.45  |
| Canada    | G3755     | 1              | 0.96 | 0.93 | 0.90 | 0.88 | 0.87 | 0.85 | 0.83  | 0.82  | 0.80  | 0.78  | 0.76  | 0.75  | 0.74  | 0.73  | 0.71  | 0.68  | 0.65  |
| Canada    | G3756     | 1              | 1.00 | 0.99 | 0.97 | 0.92 | 0.85 | 0.77 | 0.69  | 0.62  | 0.55  | 0.49  | 0.38  | 0.31  | 0.24  | 0.20  | 0.16  | 0.10  | 0.06  |
| Canada    | G3758     | 1              | 1.00 | 0.99 | 0.99 | 0.98 | 0.97 | 0.95 | 0.94  | 0.92  | 0.91  | 0.90  | 0.87  | 0.84  | 0.82  | 0.80  | 0.77  | 0.71  | 0.66  |
| Canada    | G3759     | 1              | 1.00 | 0.99 | 0.98 | 0.96 | 0.91 | 0.84 | 0.75  | 0.65  | 0.54  | 0.44  | 0.26  | 0.11  | 0.01  | -0.08 | -0.14 | -0.24 | -0.28 |
| Canada    | G3782     | 1              | 0.98 | 0.95 | 0.92 | 0.91 | 0.89 | 0.87 | 0.84  | 0.82  | 0.80  | 0.78  | 0.74  | 0.70  | 0.67  | 0.63  | 0.60  | 0.53  | 0.48  |
| Canada    | G3787     | 1              | 0.98 | 0.93 | 0.89 | 0.85 | 0.83 | 0.80 | 0.77  | 0.74  | 0.71  | 0.68  | 0.64  | 0.61  | 0.59  | 0.56  | 0.53  | 0.49  | 0.45  |
| Canada    | G3797     | 1              | 1.00 | 1.00 | 1.00 | 0.99 | 0.99 | 0.98 | 0.97  | 0.96  | 0.95  | 0.93  | 0.90  | 0.86  | 0.82  | 0.78  | 0.74  | 0.64  | 0.54  |
| Canada    | G3807     | 1              | 0.99 | 0.98 | 0.96 | 0.94 | 0.92 | 0.90 | 0.87  | 0.85  | 0.82  | 0.80  | 0.75  | 0.70  | 0.65  | 0.61  | 0.57  | 0.46  | 0.37  |
| Canada    | G3912     | 1              | 1.00 | 1.00 | 0.99 | 0.99 | 0.98 | 0.97 | 0.97  | 0.96  | 0.95  | 0.95  | 0.93  | 0.92  | 0.90  | 0.89  | 0.87  | 0.84  | 0.82  |
| Guatemala | G1788     | 1              | 0.99 | 0.93 | 0.85 | 0.76 | 0.65 | 0.55 | 0.48  | 0.41  | 0.35  | 0.30  | 0.22  | 0.15  | 0.11  | 0.08  | 0.09  | 0.10  | 0.08  |
| Guatemala | G1862     | 0              | 0.41 | 0.22 | 0.12 | 0.08 | 0.06 | 0.00 | -0.02 | -0.06 | -0.03 | -0.08 | -0.11 | -0.16 | -0.10 | -0.09 | -0.11 | -0.16 | -0.17 |
| Haiti     | G1972     | 1              | 0.88 | 0.77 | 0.68 | 0.60 | 0.55 | 0.50 | 0.47  | 0.44  | 0.40  | 0.37  | 0.32  | 0.27  | 0.23  | 0.20  | 0.15  | 0.08  | 0.05  |
| Honduras  | G1973     | 1              | 0.96 | 0.86 | 0.79 | 0.72 | 0.64 | 0.59 | 0.57  | 0.53  | 0.49  | 0.47  | 0.40  | 0.36  | 0.31  | 0.29  | 0.22  | 0.19  | 0.15  |
| Honduras  | G1974     | 1              | 0.99 | 0.96 | 0.92 | 0.87 | 0.80 | 0.73 | 0.65  | 0.57  | 0.51  | 0.45  | 0.35  | 0.26  | 0.19  | 0.12  | 0.06  | -0.04 | -0.12 |
| Mexico    | G0874     | 1              | 1.00 | 1.00 | 1.00 | 0.99 | 0.99 | 0.99 | 0.98  | 0.98  | 0.98  | 0.97  | 0.96  | 0.95  | 0.93  | 0.92  | 0.90  | 0.87  | 0.84  |
| Mexico    | G0911     | 1              | 0.99 | 0.99 | 0.98 | 0.98 | 0.98 | 0.97 | 0.97  | 0.97  | 0.96  | 0.96  | 0.95  | 0.94  | 0.94  | 0.93  | 0.92  | 0.91  | 0.89  |
| Mexico    | G0921     | 1              | 0.98 | 0.94 | 0.90 | 0.90 | 0.83 | 0.75 | 0.75  | 0.76  | 0.70  | 0.65  | 0.63  | 0.58  | 0.56  | 0.55  | 0.49  | 0.50  | 0.48  |
| Mexico    | G0922     | 1              | 0.98 | 0.92 | 0.86 | 0.79 | 0.75 | 0.70 | 0.65  | 0.66  | 0.60  | 0.56  | 0.54  | 0.46  | 0.42  | 0.40  | 0.37  | 0.34  | 0.32  |
| Mexico    | G0923     | 1              | 0.99 | 0.97 | 0.94 | 0.92 | 0.91 | 0.90 | 0.89  | 0.89  | 0.87  | 0.86  | 0.84  | 0.85  | 0.83  | 0.83  | 0.81  | 0.81  | 0.79  |
| Mexico    | G0925     | 1              | 0.99 | 0.98 | 0.97 | 0.95 | 0.93 | 0.91 | 0.90  | 0.88  | 0.87  | 0.85  | 0.82  | 0.78  | 0.75  | 0.71  | 0.68  | 0.62  | 0.55  |
| Mexico    | G0929     | 1              | 0.99 | 0.97 | 0.96 | 0.95 | 0.92 | 0.89 | 0.88  | 0.88  | 0.85  | 0.83  | 0.81  | 0.77  | 0.74  | 0.71  | 0.68  | 0.63  | 0.57  |
| Mexico    | G0933     | 1              | 1.00 | 0.97 | 0.92 | 0.87 | 0.83 | 0.78 | 0.72  | 0.68  | 0.65  | 0.60  | 0.54  | 0.44  | 0.39  | 0.35  | 0.32  | 0.25  | 0.22  |
| Mexico    | G0935     | 1              | 1.00 | 0.99 | 0.97 | 0.92 | 0.86 | 0.79 | 0.71  | 0.64  | 0.57  | 0.49  | 0.37  | 0.27  | 0.19  | 0.12  | 0.06  | 0.01  | -0.02 |
| Mexico    | G0936     | 1              | 0.97 | 0.91 | 0.85 | 0.81 | 0.78 | 0.76 | 0.73  | 0.70  | 0.68  | 0.66  | 0.62  | 0.58  | 0.54  | 0.51  | 0.48  | 0.41  | 0.34  |
| Mexico    | G0944     | 1              | 0.87 | 0.67 | 0.47 | 0.32 | 0.21 | 0.11 | 0.04  | -0.03 | -0.09 | -0.14 | -0.21 | -0.29 | -0.30 | -0.14 | -0.09 | -0.13 | -0.19 |
| Mexico    | G0948     | 1              | 0.99 | 0.96 | 0.89 | 0.79 | 0.70 | 0.62 | 0.55  | 0.51  | 0.48  | 0.44  | 0.36  | 0.30  | 0.25  | 0.23  | 0.21  | 0.15  | 0.13  |
| Mexico    | G0950     | 1              | 0.98 | 0.96 | 0.93 | 0.91 | 0.89 | 0.87 | 0.85  | 0.83  | 0.80  | 0.78  | 0.73  | 0.69  | 0.64  | 0.61  | 0.57  | 0.52  | 0.47  |
| Mexico    | G0951     | 1              | 0.99 | 0.96 | 0.94 | 0.91 | 0.89 | 0.87 | 0.85  | 0.83  | 0.81  | 0.78  | 0.73  | 0.69  | 0.65  | 0.61  | 0.58  | 0.52  | 0.47  |
| Mexico    | G0957     | 1              | 1.00 | 0.99 | 0.98 | 0.95 | 0.91 | 0.86 | 0.81  | 0.76  | 0.71  | 0.65  | 0.55  | 0.47  | 0.39  | 0.32  | 0.27  | 0.20  | 0.17  |
| Mexico    | G0961     | 1              | 0.98 | 0.91 | 0.77 | 0.60 | 0.45 | 0.34 | 0.23  | 0.15  | 0.10  | 0.05  | -0.04 | -0.10 | -0.15 | -0.18 | -0.17 | -0.17 | -0.16 |
| Mexico    | G0965     | 1              | 0.93 | 0.79 | 0.65 | 0.53 | 0.44 | 0.36 | 0.30  | 0.26  | 0.21  | 0.16  | 0.10  | 0.04  | 0.03  | 0.05  | 0.06  | 0.01  | -0.04 |
| Mexico    | G1725     | 1              | 0.98 | 0.90 | 0.77 | 0.67 | 0.59 | 0.53 | 0.48  | 0.43  | 0.40  | 0.37  | 0.31  | 0.28  | 0.24  | 0.22  | 0.22  | 0.21  | 0.20  |
| Mexico    | G1726     | 1              | 1.00 | 0.98 | 0.97 | 0.95 | 0.93 | 0.89 | 0.85  | 0.80  | 0.75  | 0.70  | 0.60  | 0.52  | 0.43  | 0.37  | 0.31  | 0.22  | 0.18  |
| Mexico    | G1860     | 1              | 1.00 | 1.00 | 0.98 | 0.96 | 0.94 | 0.93 | 0.90  | 0.87  | 0.86  | 0.85  | 0.81  | 0.80  | 0.77  | 0.76  | 0.74  | 0.71  | 0.68  |
| Mexico    | G1861     | 1              | 0.99 | 0.97 | 0.94 | 0.92 | 0.90 | 0.88 | 0.86  | 0.84  | 0.82  | 0.79  | 0.74  | 0.69  | 0.65  | 0.61  | 0.58  | 0.52  | 0.47  |

| Country       | GloFAS ID | Station filter | LT1  | LT2  | LT3  | LT4  | LT5  | LT6  | LT7   | LT8   | LT9   | LT10  | LT12  | LT14  | LT16  | LT18  | LT20  | LT25  | L30   |
|---------------|-----------|----------------|------|------|------|------|------|------|-------|-------|-------|-------|-------|-------|-------|-------|-------|-------|-------|
| Mexico        | G1980     | 1              | 0.89 | 0.73 | 0.61 | 0.53 | 0.48 | 0.42 | 0.37  | 0.35  | 0.32  | 0.28  | 0.23  | 0.18  | 0.16  | 0.15  | 0.13  | 0.09  | 0.06  |
| Mexico        | G1981     | 1              | 0.97 | 0.93 | 0.86 | 0.80 | 0.72 | 0.66 | 0.60  | 0.53  | 0.47  | 0.41  | 0.29  | 0.18  | 0.06  | -0.04 | -0.12 | -0.25 | -0.34 |
| Mexico        | G1982     | 1              | 1.00 | 0.97 | 0.93 | 0.85 | 0.76 | 0.68 | 0.61  | 0.56  | 0.52  | 0.48  | 0.40  | 0.33  | 0.28  | 0.25  | 0.22  | 0.17  | 0.14  |
| Mexico        | G1988     | 1              | 1.00 | 0.99 | 0.99 | 0.98 | 0.97 | 0.97 | 0.96  | 0.95  | 0.95  | 0.94  | 0.92  | 0.80  | 0.86  | 0.88  | 0.87  | 0.84  | 0.84  |
| Mexico        | G4313     | 1              | 1.00 | 1.00 | 1.00 | 0.99 | 0.98 | 0.95 | 0.92  | 0.86  | 0.81  | 0.78  | 0.72  | 0.65  | 0.57  | 0.51  | 0.44  | 0.33  | 0.28  |
| Mexico        | G4324     | 1              | 1.00 | 1.00 | 0.99 | 0.97 | 0.94 | 0.90 | 0.84  | 0.79  | 0.73  | 0.67  | 0.59  | 0.49  | 0.41  | 0.34  | 0.30  | 0.20  | 0.17  |
| Mexico        | G4373     | 1              | 0.99 | 0.97 | 0.95 | 0.90 | 0.83 | 0.78 | 0.73  | 0.69  | 0.64  | 0.61  | 0.54  | 0.48  | 0.43  | 0.40  | 0.37  | 0.30  | 0.26  |
| Mexico        | G4381     | 1              | 0.99 | 0.94 | 0.88 | 0.82 | 0.76 | 0.70 | 0.66  | 0.62  | 0.58  | 0.54  | 0.46  | 0.40  | 0.37  | 0.35  | 0.34  | 0.27  | 0.26  |
| Mexico        | G4432     | 1              | 0.99 | 0.97 | 0.95 | 0.93 | 0.92 | 0.90 | 0.89  | 0.87  | 0.86  | 0.84  | 0.81  | 0.78  | 0.77  | 0.76  | 0.74  | 0.71  | 0.69  |
| Mexico        | G4435     | 1              | 0.93 | 0.85 | 0.77 | 0.76 | 0.69 | 0.68 | 0.62  | 0.58  | 0.54  | 0.46  | 0.42  | 0.37  | 0.34  | 0.30  | 0.28  | 0.23  | 0.26  |
| Mexico        | G4457     | 1              | 0.99 | 0.99 | 0.98 | 0.98 | 0.98 | 0.97 | 0.97  | 0.97  | 0.96  | 0.96  | 0.95  | 0.94  | 0.94  | 0.94  | 0.93  | 0.91  | 0.89  |
| Mexico        | G4458     | 1              | 0.97 | 0.87 | 0.81 | 0.77 | 0.72 | 0.68 | 0.65  | 0.61  | 0.57  | 0.53  | 0.46  | 0.40  | 0.37  | 0.34  | 0.30  | 0.26  | 0.24  |
| Mexico        | G4491     | 1              | 0.98 | 0.92 | 0.86 | 0.79 | 0.75 | 0.70 | 0.65  | 0.66  | 0.60  | 0.56  | 0.54  | 0.46  | 0.43  | 0.40  | 0.37  | 0.34  | 0.33  |
| Mexico        | G4511     | 1              | 1.00 | 0.98 | 0.97 | 0.95 | 0.93 | 0.90 | 0.86  | 0.85  | 0.84  | 0.83  | 0.81  | 0.76  | 0.75  | 0.74  | 0.73  | 0.71  | 0.68  |
| Mexico        | G4635     | 1              | 0.99 | 0.97 | 0.92 | 0.85 | 0.78 | 0.73 | 0.69  | 0.63  | 0.59  | 0.56  | 0.46  | 0.35  | 0.30  | 0.25  | 0.23  | 0.13  | 0.11  |
| Mexico        | G4636     | 1              | 1.00 | 0.98 | 0.94 | 0.89 | 0.83 | 0.78 | 0.72  | 0.67  | 0.61  | 0.57  | 0.49  | 0.40  | 0.33  | 0.29  | 0.27  | 0.21  | 0.19  |
| Mexico        | G4651     | 1              | 0.97 | 0.85 | 0.69 | 0.56 | 0.45 | 0.35 | 0.26  | 0.19  | 0.14  | 0.09  | 0.02  | -0.05 | -0.09 | -0.13 | -0.13 | -0.14 | -0.19 |
| Mexico        | G4652     | 1              | 0.98 | 0.91 | 0.83 | 0.73 | 0.68 | 0.64 | 0.58  | 0.52  | 0.48  | 0.45  | 0.36  | 0.31  | 0.27  | 0.25  | 0.24  | 0.21  | 0.21  |
| Mexico        | G4655     | 1              | 0.98 | 0.95 | 0.92 | 0.89 | 0.87 | 0.83 | 0.79  | 0.75  | 0.71  | 0.67  | 0.59  | 0.51  | 0.45  | 0.39  | 0.35  | 0.26  | 0.19  |
| Mexico        | G4675     | 1              | 0.99 | 0.96 | 0.91 | 0.86 | 0.81 | 0.74 | 0.68  | 0.63  | 0.58  | 0.53  | 0.44  | 0.36  | 0.29  | 0.23  | 0.19  | 0.14  | 0.08  |
| Mexico        | G4683     | 1              | 0.99 | 0.98 | 0.96 | 0.94 | 0.91 | 0.88 | 0.85  | 0.81  | 0.77  | 0.74  | 0.66  | 0.60  | 0.54  | 0.48  | 0.43  | 0.34  | 0.26  |
| Mexico        | G4691     | 1              | 0.99 | 0.97 | 0.94 | 0.92 | 0.89 | 0.86 | 0.82  | 0.78  | 0.74  | 0.69  | 0.60  | 0.52  | 0.46  | 0.40  | 0.34  | 0.22  | 0.13  |
| Mexico        | G4694     | 1              | 0.99 | 0.98 | 0.96 | 0.94 | 0.91 | 0.88 | 0.85  | 0.82  | 0.79  | 0.76  | 0.70  | 0.65  | 0.59  | 0.55  | 0.50  | 0.40  | 0.31  |
| Mexico        | G4761     | 1              | 0.89 | 0.63 | 0.40 | 0.22 | 0.11 | 0.02 | -0.07 | -0.11 | -0.15 | -0.21 | -0.27 | -0.34 | -0.35 | -0.36 | -0.37 | -0.48 | -0.52 |
| Mexico        | G4767     | 1              | 1.00 | 0.99 | 0.98 | 0.96 | 0.95 | 0.93 | 0.91  | 0.88  | 0.84  | 0.80  | 0.71  | 0.61  | 0.53  | 0.45  | 0.39  | 0.26  | 0.20  |
| Mexico        | G4771     | 1              | 0.94 | 0.79 | 0.59 | 0.38 | 0.21 | 0.07 | -0.04 | -0.13 | -0.19 | -0.24 | -0.31 | -0.37 | -0.41 | -0.42 | -0.36 | -0.29 | -0.31 |
| Mexico        | G4777     | 1              | 0.99 | 0.94 | 0.89 | 0.83 | 0.79 | 0.77 | 0.74  | 0.71  | 0.68  | 0.65  | 0.59  | 0.54  | 0.50  | 0.48  | 0.45  | 0.40  | 0.37  |
| Mexico        | G4799     | 1              | 0.97 | 0.93 | 0.88 | 0.81 | 0.74 | 0.69 | 0.65  | 0.61  | 0.57  | 0.55  | 0.49  | 0.43  | 0.38  | 0.36  | 0.32  | 0.29  | 0.24  |
| Mexico        | G4848     | 1              | 0.99 | 0.95 | 0.87 | 0.78 | 0.71 | 0.64 | 0.59  | 0.54  | 0.50  | 0.45  | 0.38  | 0.31  | 0.26  | 0.22  | 0.20  | 0.17  | 0.15  |
| United States | G0013     | 1              | 1.00 | 0.99 | 0.97 | 0.95 | 0.92 | 0.88 | 0.84  | 0.80  | 0.76  | 0.73  | 0.67  | 0.63  | 0.61  | 0.57  | 0.55  | 0.53  | 0.50  |
| United States | G0034     | 1              | 1.00 | 1.00 | 0.99 | 0.97 | 0.94 | 0.91 | 0.89  | 0.87  | 0.84  | 0.82  | 0.78  | 0.75  | 0.73  | 0.71  | 0.68  | 0.64  | 0.61  |
| United States | G0041     | 1              | 0.99 | 0.97 | 0.95 | 0.93 | 0.91 | 0.89 | 0.87  | 0.86  | 0.84  | 0.82  | 0.79  | 0.75  | 0.71  | 0.68  | 0.66  | 0.62  | 0.58  |
| United States | G0054     | 1              | 1.00 | 1.00 | 1.00 | 0.99 | 0.99 | 0.98 | 0.97  | 0.96  | 0.94  | 0.93  | 0.91  | 0.88  | 0.83  | 0.75  | 0.60  | 0.21  | 0.00  |
| United States | G0074     | 1              | 1.00 | 0.99 | 0.95 | 0.89 | 0.82 | 0.77 | 0.71  | 0.67  | 0.62  | 0.58  | 0.50  | 0.43  | 0.35  | 0.27  | 0.22  | 0.15  | 0.17  |
| United States | G0076     | 1              | 1.00 | 0.99 | 0.97 | 0.92 | 0.86 | 0.77 | 0.67  | 0.55  | 0.41  | 0.29  | 0.10  | -0.03 | -0.12 | -0.18 | -0.23 | -0.35 | -0.43 |
| United States | G0082     | 1              | 1.00 | 0.98 | 0.94 | 0.89 | 0.83 | 0.77 | 0.71  | 0.66  | 0.62  | 0.57  | 0.50  | 0.44  | 0.37  | 0.30  | 0.24  | 0.14  | 0.14  |
| United States | G0086     | 1              | 0.91 | 0.69 | 0.49 | 0.37 | 0.29 | 0.23 | 0.19  | 0.16  | 0.15  | 0.13  | 0.12  | 0.11  | 0.10  | 0.08  | 0.06  | 0.05  | 0.05  |
| United States | G0099     | 1              | 1.00 | 0.99 | 0.97 | 0.92 | 0.83 | 0.71 | 0.57  | 0.43  | 0.30  | 0.20  | 0.06  | -0.04 | -0.10 | -0.14 | -0.11 | 0.10  | 0.08  |
| United States | G0109     | 1              | 0.84 | 0.46 | 0.28 | 0.22 | 0.21 | 0.23 | 0.23  | 0.24  | 0.25  | 0.25  | 0.25  | 0.22  | 0.18  | 0.06  | -0.02 | -0.08 | -0.09 |



| Country       | GloFAS ID | Station filter | LT1  | LT2  | LT3  | LT4  | LT5   | LT6   | LT7   | LT8   | LT9   | LT10  | LT12  | LT14  | LT16  | LT18  | LT20  | LT25  | L30   |
|---------------|-----------|----------------|------|------|------|------|-------|-------|-------|-------|-------|-------|-------|-------|-------|-------|-------|-------|-------|
| United States | G0120     | 1              | 0.96 | 0.76 | 0.53 | 0.42 | 0.38  | 0.37  | 0.36  | 0.35  | 0.33  | 0.32  | 0.30  | 0.26  | 0.23  | 0.11  | 0.00  | -0.09 | -0.16 |
| United States | G0123     | 1              | 1.00 | 1.00 | 1.00 | 0.99 | 0.98  | 0.97  | 0.96  | 0.95  | 0.93  | 0.92  | 0.88  | 0.84  | 0.79  | 0.74  | 0.69  | 0.58  | 0.45  |
| United States | G0124     | 1              | 1.00 | 0.99 | 0.95 | 0.88 | 0.80  | 0.70  | 0.61  | 0.53  | 0.47  | 0.42  | 0.35  | 0.30  | 0.26  | 0.22  | 0.17  | 0.04  | -0.01 |
| United States | G0130     | 1              | 0.98 | 0.88 | 0.68 | 0.52 | 0.42  | 0.37  | 0.33  | 0.29  | 0.26  | 0.23  | 0.16  | 0.11  | 0.06  | -0.04 | -0.14 | -0.22 | -0.31 |
| United States | G0131     | 1              | 0.96 | 0.82 | 0.60 | 0.39 | 0.22  | 0.10  | 0.02  | -0.04 | -0.09 | -0.14 | -0.22 | -0.31 | -0.42 | -0.61 | -0.77 | -0.91 | -1.00 |
| United States | G0151     | 1              | 0.96 | 0.83 | 0.69 | 0.52 | 0.35  | 0.19  | 0.07  | -0.02 | -0.08 | -0.13 | -0.22 | -0.32 | -0.43 | -0.59 | -0.78 | -1.00 | -1.11 |
| United States | G0172     | 1              | 0.99 | 0.93 | 0.80 | 0.63 | 0.47  | 0.35  | 0.25  | 0.17  | 0.09  | 0.02  | -0.10 | -0.20 | -0.30 | -0.51 | -0.75 | -1.14 | -1.32 |
| United States | G0174     | 1              | 1.00 | 0.99 | 0.96 | 0.92 | 0.87  | 0.80  | 0.73  | 0.67  | 0.61  | 0.56  | 0.48  | 0.42  | 0.37  | 0.32  | 0.28  | 0.21  | 0.14  |
| United States | G0189     | 1              | 0.95 | 0.84 | 0.70 | 0.58 | 0.48  | 0.41  | 0.34  | 0.27  | 0.21  | 0.15  | 0.05  | -0.05 | -0.13 | -0.23 | -0.33 | -0.49 | -0.63 |
| United States | G0219     | 1              | 0.90 | 0.74 | 0.62 | 0.52 | 0.41  | 0.29  | 0.19  | 0.09  | 0.00  | -0.08 | -0.20 | -0.33 | -0.46 | -0.60 | -0.68 | -0.79 | -0.88 |
| United States | G0431     | 1              | 0.99 | 0.98 | 0.96 | 0.95 | 0.93  | 0.92  | 0.90  | 0.89  | 0.86  | 0.83  | 0.75  | 0.68  | 0.62  | 0.56  | 0.51  | 0.40  | 0.31  |
| United States | G0432     | 1              | 1.00 | 0.99 | 0.99 | 0.98 | 0.97  | 0.96  | 0.93  | 0.90  | 0.84  | 0.78  | 0.67  | 0.57  | 0.49  | 0.42  | 0.35  | 0.21  | 0.09  |
| United States | G0434     | 1              | 0.92 | 0.78 | 0.59 | 0.45 | 0.35  | 0.27  | 0.21  | 0.16  | 0.13  | 0.11  | 0.08  | 0.06  | 0.03  | 0.01  | 0.01  | 0.02  | 0.01  |
| United States | G0435     | 1              | 1.00 | 0.99 | 0.97 | 0.92 | 0.86  | 0.80  | 0.76  | 0.72  | 0.67  | 0.64  | 0.55  | 0.49  | 0.44  | 0.41  | 0.38  | 0.34  | 0.31  |
| United States | G0437     | 1              | 0.96 | 0.85 | 0.68 | 0.51 | 0.39  | 0.31  | 0.24  | 0.18  | 0.15  | 0.12  | 0.08  | 0.06  | 0.03  | 0.01  | 0.01  | 0.01  | 0.01  |
| United States | G0440     | 1              | 0.85 | 0.56 | 0.26 | 0.03 | -0.15 | -0.27 | -0.37 | -0.45 | -0.50 | -0.55 | -0.62 | -0.68 | -0.70 | -0.67 | -0.66 | -0.67 | -0.69 |
| United States | G0446     | 1              | 1.00 | 1.00 | 0.99 | 0.98 | 0.97  | 0.95  | 0.93  | 0.91  | 0.88  | 0.86  | 0.81  | 0.76  | 0.71  | 0.65  | 0.59  | 0.40  | 0.22  |
| United States | G0447     | 1              | 1.00 | 0.99 | 0.97 | 0.95 | 0.90  | 0.85  | 0.76  | 0.65  | 0.52  | 0.40  | 0.19  | 0.05  | -0.04 | -0.12 | -0.22 | -0.36 | -0.40 |
| United States | G0452     | 1              | 1.00 | 1.00 | 0.99 | 0.98 | 0.95  | 0.92  | 0.89  | 0.85  | 0.81  | 0.77  | 0.69  | 0.62  | 0.55  | 0.50  | 0.46  | 0.38  | 0.34  |
| United States | G0453     | 1              | 1.00 | 0.99 | 0.99 | 0.98 | 0.97  | 0.95  | 0.94  | 0.93  | 0.92  | 0.91  | 0.89  | 0.87  | 0.85  | 0.83  | 0.82  | 0.77  | 0.74  |
| United States | G0455     | 1              | 1.00 | 1.00 | 0.99 | 0.98 | 0.97  | 0.95  | 0.93  | 0.91  | 0.87  | 0.84  | 0.77  | 0.70  | 0.62  | 0.56  | 0.50  | 0.40  | 0.33  |
| United States | G0458     | 1              | 1.00 | 0.99 | 0.96 | 0.92 | 0.88  | 0.83  | 0.79  | 0.75  | 0.72  | 0.68  | 0.62  | 0.57  | 0.54  | 0.50  | 0.48  | 0.43  | 0.39  |
| United States | G0459     | 1              | 0.98 | 0.89 | 0.79 | 0.71 | 0.64  | 0.59  | 0.54  | 0.51  | 0.48  | 0.46  | 0.42  | 0.40  | 0.38  | 0.36  | 0.35  | 0.31  | 0.28  |
| United States | G0463     | 1              | 1.00 | 0.99 | 0.99 | 0.97 | 0.93  | 0.89  | 0.84  | 0.80  | 0.75  | 0.71  | 0.63  | 0.55  | 0.49  | 0.45  | 0.41  | 0.35  | 0.32  |
| United States | G0466     | 1              | 1.00 | 0.99 | 0.97 | 0.95 | 0.91  | 0.87  | 0.80  | 0.71  | 0.59  | 0.47  | 0.24  | 0.09  | -0.02 | -0.11 | -0.20 | -0.36 | -0.41 |
| United States | G0468     | 1              | 0.98 | 0.96 | 0.94 | 0.92 | 0.89  | 0.85  | 0.80  | 0.75  | 0.71  | 0.67  | 0.60  | 0.52  | 0.47  | 0.42  | 0.38  | 0.32  | 0.30  |
| United States | G0470     | 1              | 0.99 | 0.98 | 0.96 | 0.94 | 0.91  | 0.88  | 0.83  | 0.79  | 0.75  | 0.71  | 0.63  | 0.55  | 0.49  | 0.44  | 0.40  | 0.33  | 0.30  |
| United States | G0472     | 1              | 1.00 | 1.00 | 1.00 | 1.00 | 0.99  | 0.99  | 0.99  | 0.98  | 0.97  | 0.97  | 0.95  | 0.92  | 0.90  | 0.87  | 0.84  | 0.75  | 0.65  |
| United States | G0473     | 1              | 1.00 | 0.98 | 0.95 | 0.92 | 0.89  | 0.87  | 0.84  | 0.81  | 0.80  | 0.79  | 0.75  | 0.74  | 0.73  | 0.71  | 0.71  | 0.68  | 0.66  |
| United States | G0474     | 1              | 1.00 | 0.98 | 0.96 | 0.93 | 0.88  | 0.79  | 0.69  | 0.58  | 0.47  | 0.38  | 0.23  | 0.13  | 0.07  | 0.02  | -0.01 | -0.07 | -0.07 |
| United States | G0476     | 1              | 0.99 | 0.98 | 0.96 | 0.94 | 0.91  | 0.89  | 0.87  | 0.87  | 0.86  | 0.85  | 0.84  | 0.82  | 0.82  | 0.81  | 0.81  | 0.80  | 0.79  |
| United States | G0477     | 1              | 0.95 | 0.87 | 0.77 | 0.67 | 0.57  | 0.50  | 0.44  | 0.39  | 0.35  | 0.33  | 0.28  | 0.25  | 0.22  | 0.26  | 0.28  | 0.33  | 0.31  |
| United States | G0479     | 1              | 1.00 | 1.00 | 1.00 | 0.99 | 0.99  | 0.98  | 0.97  | 0.96  | 0.95  | 0.94  | 0.91  | 0.87  | 0.83  | 0.79  | 0.74  | 0.64  | 0.54  |
| United States | G0480     | 1              | 1.00 | 1.00 | 0.99 | 0.99 | 0.98  | 0.97  | 0.96  | 0.94  | 0.92  | 0.90  | 0.84  | 0.79  | 0.73  | 0.68  | 0.63  | 0.51  | 0.41  |
| United States | G0481     | 1              | 1.00 | 1.00 | 1.00 | 0.99 | 0.99  | 0.99  | 0.99  | 0.98  | 0.98  | 0.98  | 0.97  | 0.97  | 0.96  | 0.95  | 0.94  | 0.92  | 0.88  |
| United States | G0482     | 1              | 1.00 | 0.99 | 0.97 | 0.95 | 0.92  | 0.88  | 0.85  | 0.81  | 0.77  | 0.74  | 0.67  | 0.61  | 0.56  | 0.52  | 0.49  | 0.42  | 0.38  |
| United States | G0485     | 1              | 1.00 | 1.00 | 0.99 | 0.97 | 0.93  | 0.85  | 0.74  | 0.60  | 0.45  | 0.31  | 0.08  | -0.09 | -0.19 | -0.25 | -0.28 | -0.29 | -0.24 |
| United States | G0487     | 1              | 0.99 | 0.95 | 0.91 | 0.85 | 0.79  | 0.74  | 0.69  | 0.65  | 0.61  | 0.58  | 0.51  | 0.45  | 0.42  | 0.39  | 0.37  | 0.33  | 0.31  |
| United States | G0490     | 1              | 0.93 | 0.88 | 0.80 | 0.75 | 0.68  | 0.65  | 0.61  | 0.57  | 0.54  | 0.51  | 0.45  | 0.42  | 0.39  | 0.38  | 0.36  | 0.34  | 0.32  |

| Country       | GloFAS ID | Station filter | LT1  | LT2  | LT3  | LT4  | LT5   | LT6   | LT7   | LT8   | LT9   | LT10  | LT12  | LT14  | LT16  | LT18  | LT20  | LT25  | L30   |
|---------------|-----------|----------------|------|------|------|------|-------|-------|-------|-------|-------|-------|-------|-------|-------|-------|-------|-------|-------|
| United States | G0494     | 1              | 0.88 | 0.63 | 0.35 | 0.14 | 0.00  | -0.08 | -0.14 | -0.20 | -0.23 | -0.27 | -0.35 | -0.41 | -0.45 | -0.49 | -0.53 | -0.61 | -0.67 |
| United States | G0495     | 1              | 1.00 | 0.99 | 0.95 | 0.88 | 0.75  | 0.60  | 0.45  | 0.30  | 0.17  | 0.06  | -0.11 | -0.20 | -0.25 | -0.28 | -0.29 | -0.25 | -0.19 |
| United States | G0496     | 1              | 1.00 | 1.00 | 1.00 | 0.99 | 0.99  | 0.98  | 0.96  | 0.94  | 0.90  | 0.86  | 0.75  | 0.63  | 0.49  | 0.37  | 0.26  | 0.06  | 0.00  |
| United States | G0497     | 1              | 1.00 | 1.00 | 0.99 | 0.95 | 0.88  | 0.77  | 0.64  | 0.48  | 0.34  | 0.20  | -0.01 | -0.14 | -0.22 | -0.26 | -0.28 | -0.27 | -0.20 |
| United States | G0498     | 1              | 1.00 | 0.98 | 0.91 | 0.86 | 0.84  | 0.81  | 0.78  | 0.75  | 0.72  | 0.66  | 0.58  | 0.50  | 0.46  | 0.39  | 0.32  | 0.21  | 0.14  |
| United States | G0505     | 1              | 0.99 | 0.97 | 0.95 | 0.93 | 0.91  | 0.89  | 0.87  | 0.85  | 0.83  | 0.80  | 0.74  | 0.69  | 0.63  | 0.57  | 0.52  | 0.41  | 0.32  |
| United States | G0508     | 1              | 0.99 | 0.99 | 0.97 | 0.95 | 0.93  | 0.92  | 0.90  | 0.88  | 0.87  | 0.85  | 0.83  | 0.80  | 0.78  | 0.76  | 0.75  | 0.69  | 0.65  |
| United States | G0509     | 1              | 1.00 | 0.98 | 0.93 | 0.83 | 0.69  | 0.56  | 0.44  | 0.34  | 0.26  | 0.20  | 0.11  | 0.05  | 0.01  | -0.03 | -0.05 | -0.07 | -0.04 |
| United States | G0510     | 1              | 1.00 | 0.96 | 0.85 | 0.66 | 0.45  | 0.26  | 0.11  | 0.00  | -0.09 | -0.15 | -0.24 | -0.31 | -0.35 | -0.39 | -0.43 | -0.50 | -0.53 |
| United States | G0511     | 1              | 1.00 | 0.99 | 0.97 | 0.95 | 0.92  | 0.89  | 0.86  | 0.83  | 0.80  | 0.77  | 0.72  | 0.67  | 0.63  | 0.58  | 0.55  | 0.48  | 0.43  |
| United States | G0512     | 1              | 0.99 | 0.97 | 0.94 | 0.91 | 0.89  | 0.87  | 0.85  | 0.82  | 0.80  | 0.77  | 0.71  | 0.65  | 0.60  | 0.54  | 0.49  | 0.37  | 0.29  |
| United States | G0513     | 1              | 1.00 | 0.98 | 0.96 | 0.92 | 0.88  | 0.83  | 0.78  | 0.72  | 0.67  | 0.62  | 0.54  | 0.47  | 0.40  | 0.34  | 0.30  | 0.16  | 0.10  |
| United States | G0515     | 1              | 0.99 | 0.91 | 0.76 | 0.65 | 0.58  | 0.54  | 0.51  | 0.49  | 0.48  | 0.47  | 0.47  | 0.47  | 0.46  | 0.46  | 0.45  | 0.41  | 0.37  |
| United States | G0520     | 1              | 1.00 | 0.99 | 0.98 | 0.95 | 0.93  | 0.89  | 0.85  | 0.80  | 0.76  | 0.71  | 0.60  | 0.50  | 0.42  | 0.35  | 0.28  | 0.18  | 0.15  |
| United States | G0521     | 1              | 1.00 | 0.99 | 0.98 | 0.96 | 0.94  | 0.92  | 0.91  | 0.89  | 0.87  | 0.85  | 0.82  | 0.79  | 0.76  | 0.73  | 0.71  | 0.66  | 0.63  |
| United States | G0522     | 1              | 0.99 | 0.96 | 0.94 | 0.91 | 0.89  | 0.86  | 0.84  | 0.81  | 0.78  | 0.75  | 0.69  | 0.65  | 0.60  | 0.55  | 0.52  | 0.45  | 0.40  |
| United States | G0523     | 1              | 0.88 | 0.67 | 0.49 | 0.34 | 0.24  | 0.17  | 0.11  | 0.06  | 0.02  | -0.01 | -0.07 | -0.11 | -0.09 | 0.05  | 0.12  | 0.14  | 0.14  |
| United States | G0524     | 1              | 0.98 | 0.95 | 0.92 | 0.88 | 0.84  | 0.81  | 0.78  | 0.73  | 0.70  | 0.66  | 0.59  | 0.54  | 0.48  | 0.43  | 0.39  | 0.31  | 0.27  |
| United States | G0526     | 1              | 0.99 | 0.98 | 0.97 | 0.97 | 0.96  | 0.96  | 0.95  | 0.95  | 0.94  | 0.94  | 0.93  | 0.92  | 0.92  | 0.91  | 0.91  | 0.88  | 0.85  |
| United States | G0527     | 1              | 0.99 | 0.98 | 0.97 | 0.96 | 0.96  | 0.95  | 0.94  | 0.93  | 0.92  | 0.91  | 0.89  | 0.86  | 0.84  | 0.82  | 0.81  | 0.79  | 0.77  |
| United States | G0531     | 1              | 1.00 | 0.99 | 0.99 | 0.97 | 0.95  | 0.92  | 0.88  | 0.84  | 0.81  | 0.77  | 0.70  | 0.63  | 0.57  | 0.51  | 0.46  | 0.36  | 0.30  |
| United States | G0532     | 1              | 0.99 | 0.99 | 0.99 | 0.98 | 0.98  | 0.97  | 0.96  | 0.95  | 0.94  | 0.93  | 0.90  | 0.87  | 0.83  | 0.81  | 0.78  | 0.71  | 0.66  |
| United States | G0533     | 1              | 1.00 | 0.99 | 0.97 | 0.95 | 0.92  | 0.90  | 0.88  | 0.86  | 0.83  | 0.81  | 0.76  | 0.70  | 0.64  | 0.58  | 0.52  | 0.40  | 0.30  |
| United States | G0535     | 1              | 0.96 | 0.90 | 0.86 | 0.81 | 0.76  | 0.73  | 0.71  | 0.68  | 0.65  | 0.64  | 0.61  | 0.59  | 0.56  | 0.56  | 0.54  | 0.53  | 0.50  |
| United States | G0537     | 1              | 0.99 | 0.91 | 0.77 | 0.64 | 0.51  | 0.41  | 0.33  | 0.26  | 0.20  | 0.16  | 0.09  | 0.05  | 0.02  | 0.01  | 0.01  | 0.04  | 0.06  |
| United States | G0539     | 1              | 0.99 | 0.93 | 0.82 | 0.70 | 0.58  | 0.47  | 0.39  | 0.31  | 0.25  | 0.20  | 0.14  | 0.10  | 0.08  | 0.05  | 0.05  | 0.08  | 0.12  |
| United States | G0540     | 1              | 1.00 | 1.00 | 1.00 | 0.99 | 0.99  | 0.99  | 0.98  | 0.97  | 0.96  | 0.94  | 0.91  | 0.88  | 0.85  | 0.82  | 0.79  | 0.73  | 0.68  |
| United States | G0541     | 1              | 0.86 | 0.70 | 0.58 | 0.47 | 0.39  | 0.33  | 0.28  | 0.23  | 0.18  | 0.16  | 0.10  | 0.07  | 0.06  | 0.11  | 0.13  | 0.15  | 0.15  |
| United States | G0542     | 1              | 0.73 | 0.41 | 0.20 | 0.04 | -0.08 | -0.16 | -0.23 | -0.29 | -0.33 | -0.34 | -0.41 | -0.43 | -0.39 | -0.22 | -0.16 | -0.14 | -0.16 |
| United States | G0544     | 1              | 0.94 | 0.85 | 0.77 | 0.69 | 0.63  | 0.60  | 0.55  | 0.52  | 0.49  | 0.46  | 0.37  | 0.32  | 0.31  | 0.27  | 0.23  | 0.20  | 0.18  |
| United States | G0546     | 1              | 0.93 | 0.83 | 0.76 | 0.70 | 0.60  | 0.55  | 0.52  | 0.48  | 0.45  | 0.42  | 0.34  | 0.29  | 0.21  | 0.19  | 0.15  | 0.11  | 0.07  |
| United States | G0547     | 1              | 1.00 | 0.99 | 0.98 | 0.95 | 0.91  | 0.87  | 0.83  | 0.79  | 0.75  | 0.71  | 0.63  | 0.56  | 0.50  | 0.45  | 0.40  | 0.32  | 0.27  |
| United States | G0548     | 1              | 1.00 | 1.00 | 0.99 | 0.97 | 0.94  | 0.89  | 0.85  | 0.82  | 0.78  | 0.73  | 0.63  | 0.54  | 0.47  | 0.39  | 0.32  | 0.16  | 0.06  |
| United States | G0549     | 1              | 1.00 | 0.97 | 0.92 | 0.85 | 0.78  | 0.72  | 0.66  | 0.61  | 0.56  | 0.52  | 0.46  | 0.41  | 0.37  | 0.33  | 0.31  | 0.30  | 0.32  |
| United States | G0552     | 1              | 0.98 | 0.95 | 0.92 | 0.89 | 0.86  | 0.84  | 0.83  | 0.81  | 0.79  | 0.77  | 0.74  | 0.69  | 0.64  | 0.60  | 0.56  | 0.46  | 0.38  |
| United States | G0555     | 1              | 0.99 | 0.91 | 0.78 | 0.63 | 0.49  | 0.37  | 0.27  | 0.20  | 0.14  | 0.08  | 0.01  | -0.05 | -0.10 | -0.07 | 0.01  | 0.12  | 0.13  |
| United States | G0556     | 1              | 0.92 | 0.82 | 0.75 | 0.70 | 0.64  | 0.60  | 0.56  | 0.53  | 0.49  | 0.47  | 0.43  | 0.40  | 0.38  | 0.40  | 0.40  | 0.40  | 0.36  |
| United States | G0557     | 1              | 1.00 | 0.98 | 0.95 | 0.91 | 0.86  | 0.82  | 0.77  | 0.73  | 0.69  | 0.66  | 0.60  | 0.54  | 0.49  | 0.46  | 0.43  | 0.42  | 0.41  |
| United States | G0563     | 1              | 0.93 | 0.79 | 0.63 | 0.47 | 0.34  | 0.25  | 0.18  | 0.12  | 0.07  | 0.03  | -0.04 | -0.09 | -0.10 | -0.02 | 0.06  | 0.14  | 0.14  |

| Country       | GloFAS ID | Station filter | LT1  | LT2  | LT3  | LT4  | LT5  | LT6  | LT7  | LT8  | LT9   | LT10  | LT12  | LT14  | LT16  | LT18  | LT20 | LT25 | L30   |
|---------------|-----------|----------------|------|------|------|------|------|------|------|------|-------|-------|-------|-------|-------|-------|------|------|-------|
| United States | G0567     | 1              | 0.75 | 0.50 | 0.33 | 0.22 | 0.15 | 0.10 | 0.06 | 0.02 | -0.01 | -0.02 | -0.07 | -0.11 | -0.08 | 0.00  | 0.03 | 0.03 | -0.01 |
| United States | G0569     | 1              | 0.99 | 0.96 | 0.90 | 0.84 | 0.78 | 0.73 | 0.68 | 0.64 | 0.60  | 0.57  | 0.51  | 0.44  | 0.38  | 0.34  | 0.30 | 0.27 | 0.23  |
| United States | G0571     | 1              | 0.96 | 0.87 | 0.79 | 0.68 | 0.62 | 0.58 | 0.52 | 0.49 | 0.46  | 0.43  | 0.34  | 0.28  | 0.27  | 0.22  | 0.20 | 0.14 | 0.14  |
| United States | G0572     | 1              | 1.00 | 1.00 | 0.99 | 0.97 | 0.95 | 0.93 | 0.90 | 0.87 | 0.84  | 0.81  | 0.75  | 0.69  | 0.63  | 0.57  | 0.51 | 0.36 | 0.25  |
| United States | G0573     | 1              | 0.97 | 0.85 | 0.69 | 0.54 | 0.41 | 0.32 | 0.26 | 0.20 | 0.15  | 0.11  | 0.04  | -0.01 | -0.03 | 0.03  | 0.10 | 0.16 | 0.17  |
| United States | G0574     | 1              | 1.00 | 1.00 | 0.99 | 0.99 | 0.98 | 0.97 | 0.96 | 0.94 | 0.93  | 0.91  | 0.86  | 0.81  | 0.76  | 0.70  | 0.65 | 0.52 | 0.41  |
| United States | G0575     | 1              | 1.00 | 1.00 | 0.99 | 0.99 | 0.99 | 0.98 | 0.98 | 0.97 | 0.96  | 0.95  | 0.91  | 0.87  | 0.83  | 0.78  | 0.73 | 0.62 | 0.52  |
| United States | G0576     | 1              | 0.96 | 0.84 | 0.69 | 0.55 | 0.44 | 0.38 | 0.33 | 0.29 | 0.26  | 0.23  | 0.19  | 0.17  | 0.15  | 0.15  | 0.15 | 0.15 | 0.17  |
| United States | G0580     | 1              | 0.97 | 0.89 | 0.79 | 0.71 | 0.65 | 0.61 | 0.57 | 0.55 | 0.51  | 0.48  | 0.43  | 0.36  | 0.32  | 0.28  | 0.26 | 0.20 | 0.16  |
| United States | G0583     | 1              | 1.00 | 1.00 | 0.99 | 0.98 | 0.96 | 0.94 | 0.91 | 0.87 | 0.82  | 0.77  | 0.67  | 0.59  | 0.52  | 0.46  | 0.43 | 0.38 | 0.33  |
| United States | G0586     | 1              | 0.99 | 0.85 | 0.62 | 0.46 | 0.35 | 0.28 | 0.22 | 0.18 | 0.16  | 0.14  | 0.11  | 0.09  | 0.08  | 0.06  | 0.05 | 0.03 | 0.02  |
| United States | G0587     | 1              | 0.98 | 0.93 | 0.87 | 0.80 | 0.74 | 0.68 | 0.63 | 0.59 | 0.55  | 0.52  | 0.46  | 0.40  | 0.36  | 0.33  | 0.30 | 0.23 | 0.19  |
| United States | G0588     | 1              | 0.96 | 0.87 | 0.79 | 0.71 | 0.65 | 0.60 | 0.55 | 0.52 | 0.49  | 0.46  | 0.38  | 0.32  | 0.29  | 0.25  | 0.23 | 0.18 | 0.15  |
| United States | G0589     | 1              | 1.00 | 0.99 | 0.97 | 0.95 | 0.93 | 0.90 | 0.87 | 0.83 | 0.80  | 0.76  | 0.70  | 0.64  | 0.59  | 0.56  | 0.53 | 0.50 | 0.50  |
| United States | G0590     | 1              | 0.99 | 0.87 | 0.75 | 0.67 | 0.62 | 0.58 | 0.55 | 0.53 | 0.52  | 0.50  | 0.49  | 0.48  | 0.46  | 0.45  | 0.43 | 0.40 | 0.37  |
| United States | G0597     | 1              | 1.00 | 1.00 | 1.00 | 1.00 | 1.00 | 1.00 | 0.99 | 0.99 | 0.99  | 0.98  | 0.97  | 0.96  | 0.95  | 0.93  | 0.92 | 0.89 | 0.86  |
| United States | G0598     | 1              | 1.00 | 1.00 | 1.00 | 0.99 | 0.98 | 0.97 | 0.95 | 0.94 | 0.92  | 0.90  | 0.87  | 0.83  | 0.79  | 0.75  | 0.70 | 0.60 | 0.51  |
| United States | G0600     | 1              | 0.98 | 0.90 | 0.78 | 0.68 | 0.61 | 0.56 | 0.53 | 0.50 | 0.46  | 0.43  | 0.38  | 0.32  | 0.27  | 0.24  | 0.23 | 0.18 | 0.15  |
| United States | G0601     | 1              | 0.96 | 0.92 | 0.85 | 0.78 | 0.73 | 0.68 | 0.63 | 0.59 | 0.56  | 0.53  | 0.46  | 0.41  | 0.36  | 0.33  | 0.29 | 0.23 | 0.19  |
| United States | G0602     | 1              | 1.00 | 0.99 | 0.98 | 0.96 | 0.93 | 0.90 | 0.87 | 0.83 | 0.80  | 0.77  | 0.69  | 0.62  | 0.55  | 0.50  | 0.45 | 0.35 | 0.30  |
| United States | G0603     | 1              | 0.99 | 0.98 | 0.96 | 0.93 | 0.88 | 0.84 | 0.79 | 0.75 | 0.71  | 0.67  | 0.61  | 0.57  | 0.53  | 0.50  | 0.48 | 0.42 | 0.38  |
| United States | G0605     | 1              | 0.98 | 0.92 | 0.82 | 0.73 | 0.66 | 0.60 | 0.55 | 0.51 | 0.48  | 0.45  | 0.40  | 0.37  | 0.34  | 0.31  | 0.28 | 0.23 | 0.20  |
| United States | G0607     | 1              | 1.00 | 0.96 | 0.84 | 0.74 | 0.66 | 0.61 | 0.57 | 0.54 | 0.52  | 0.50  | 0.48  | 0.46  | 0.45  | 0.43  | 0.41 | 0.37 | 0.35  |
| United States | G0609     | 1              | 0.93 | 0.78 | 0.62 | 0.48 | 0.39 | 0.33 | 0.29 | 0.25 | 0.22  | 0.20  | 0.16  | 0.14  | 0.12  | 0.12  | 0.12 | 0.12 | 0.14  |
| United States | G0610     | 1              | 1.00 | 0.99 | 0.95 | 0.88 | 0.79 | 0.68 | 0.58 | 0.48 | 0.39  | 0.31  | 0.19  | 0.09  | 0.02  | -0.02 | 0.01 | 0.18 | 0.22  |
| United States | G0611     | 1              | 0.99 | 0.97 | 0.94 | 0.90 | 0.87 | 0.83 | 0.79 | 0.75 | 0.72  | 0.68  | 0.61  | 0.55  | 0.49  | 0.43  | 0.37 | 0.24 | 0.16  |
| United States | G0613     | 1              | 1.00 | 0.98 | 0.94 | 0.88 | 0.84 | 0.79 | 0.74 | 0.69 | 0.65  | 0.61  | 0.53  | 0.46  | 0.42  | 0.36  | 0.33 | 0.24 | 0.19  |
| United States | G0614     | 1              | 0.87 | 0.76 | 0.68 | 0.61 | 0.52 | 0.47 | 0.45 | 0.39 | 0.35  | 0.34  | 0.27  | 0.25  | 0.22  | 0.22  | 0.20 | 0.19 | 0.16  |
| United States | G0616     | 1              | 0.97 | 0.92 | 0.85 | 0.81 | 0.77 | 0.73 | 0.69 | 0.66 | 0.63  | 0.60  | 0.56  | 0.53  | 0.51  | 0.48  | 0.45 | 0.40 | 0.36  |
| United States | G0618     | 1              | 0.98 | 0.92 | 0.89 | 0.84 | 0.78 | 0.73 | 0.70 | 0.66 | 0.61  | 0.59  | 0.53  | 0.49  | 0.44  | 0.42  | 0.39 | 0.34 | 0.31  |
| United States | G0619     | 1              | 0.97 | 0.92 | 0.89 | 0.87 | 0.85 | 0.83 | 0.81 | 0.79 | 0.78  | 0.77  | 0.75  | 0.73  | 0.72  | 0.70  | 0.69 | 0.65 | 0.63  |
| United States | G0620     | 1              | 0.99 | 0.91 | 0.73 | 0.55 | 0.41 | 0.32 | 0.27 | 0.23 | 0.20  | 0.19  | 0.18  | 0.18  | 0.19  | 0.17  | 0.14 | 0.12 | 0.13  |
| United States | G0621     | 1              | 0.98 | 0.93 | 0.84 | 0.76 | 0.69 | 0.64 | 0.59 | 0.55 | 0.53  | 0.50  | 0.46  | 0.43  | 0.40  | 0.39  | 0.37 | 0.33 | 0.30  |
| United States | G0622     | 1              | 0.94 | 0.84 | 0.77 | 0.71 | 0.62 | 0.55 | 0.52 | 0.49 | 0.43  | 0.41  | 0.36  | 0.32  | 0.27  | 0.27  | 0.24 | 0.24 | 0.21  |
| United States | G0623     | 1              | 1.00 | 1.00 | 0.99 | 0.99 | 0.98 | 0.98 | 0.98 | 0.97 | 0.97  | 0.97  | 0.96  | 0.95  | 0.94  | 0.93  | 0.91 | 0.87 | 0.83  |
| United States | G0624     | 1              | 0.99 | 0.95 | 0.89 | 0.83 | 0.77 | 0.72 | 0.68 | 0.64 | 0.60  | 0.58  | 0.53  | 0.49  | 0.46  | 0.47  | 0.47 | 0.46 | 0.43  |
| United States | G0625     | 1              | 1.00 | 0.99 | 0.99 | 0.98 | 0.97 | 0.96 | 0.95 | 0.93 | 0.92  | 0.91  | 0.87  | 0.83  | 0.79  | 0.74  | 0.69 | 0.56 | 0.45  |
| United States | G0628     | 1              | 1.00 | 0.99 | 0.97 | 0.93 | 0.90 | 0.86 | 0.82 | 0.77 | 0.74  | 0.70  | 0.64  | 0.60  | 0.56  | 0.52  | 0.49 | 0.42 | 0.37  |
| United States | G0630     | 1              | 1.00 | 0.98 | 0.96 | 0.94 | 0.92 | 0.90 | 0.87 | 0.83 | 0.80  | 0.77  | 0.72  | 0.66  | 0.61  | 0.57  | 0.53 | 0.43 | 0.36  |

| Country       | GloFAS ID | Station filter | LT1  | LT2  | LT3  | LT4   | LT5   | LT6   | LT7   | LT8   | LT9   | LT10  | LT12  | LT14  | LT16  | LT18  | LT20  | LT25  | L30   |
|---------------|-----------|----------------|------|------|------|-------|-------|-------|-------|-------|-------|-------|-------|-------|-------|-------|-------|-------|-------|
| United States | G0631     | 1              | 0.94 | 0.88 | 0.83 | 0.79  | 0.77  | 0.75  | 0.73  | 0.71  | 0.71  | 0.69  | 0.67  | 0.65  | 0.65  | 0.65  | 0.65  | 0.61  | 0.59  |
| United States | G0634     | 1              | 0.92 | 0.80 | 0.72 | 0.66  | 0.60  | 0.57  | 0.53  | 0.49  | 0.44  | 0.39  | 0.34  | 0.29  | 0.25  | 0.22  | 0.20  | 0.16  | 0.15  |
| United States | G0635     | 1              | 0.95 | 0.85 | 0.77 | 0.70  | 0.64  | 0.60  | 0.56  | 0.52  | 0.47  | 0.44  | 0.38  | 0.34  | 0.29  | 0.25  | 0.22  | 0.16  | 0.14  |
| United States | G0636     | 1              | 0.99 | 0.99 | 0.99 | 0.99  | 0.99  | 0.99  | 0.98  | 0.98  | 0.98  | 0.98  | 0.97  | 0.96  | 0.96  | 0.96  | 0.95  | 0.93  | 0.91  |
| United States | G0637     | 1              | 0.99 | 0.76 | 0.35 | 0.04  | -0.16 | -0.28 | -0.37 | -0.41 | -0.44 | -0.45 | -0.45 | -0.44 | -0.41 | -0.38 | -0.36 | -0.32 | -0.28 |
| United States | G0640     | 1              | 0.99 | 0.97 | 0.93 | 0.88  | 0.83  | 0.77  | 0.72  | 0.67  | 0.63  | 0.59  | 0.53  | 0.48  | 0.44  | 0.41  | 0.39  | 0.34  | 0.31  |
| United States | G0641     | 1              | 0.99 | 0.99 | 0.98 | 0.97  | 0.95  | 0.92  | 0.89  | 0.85  | 0.81  | 0.76  | 0.67  | 0.57  | 0.47  | 0.38  | 0.29  | 0.13  | 0.07  |
| United States | G0642     | 1              | 0.90 | 0.77 | 0.70 | 0.66  | 0.63  | 0.61  | 0.59  | 0.56  | 0.54  | 0.53  | 0.49  | 0.46  | 0.43  | 0.45  | 0.43  | 0.36  | 0.31  |
| United States | G0643     | 1              | 0.91 | 0.80 | 0.69 | 0.60  | 0.53  | 0.46  | 0.41  | 0.36  | 0.33  | 0.29  | 0.24  | 0.19  | 0.17  | 0.19  | 0.20  | 0.17  | 0.13  |
| United States | G0644     | 1              | 1.00 | 0.97 | 0.85 | 0.64  | 0.42  | 0.24  | 0.10  | 0.01  | -0.06 | -0.10 | -0.15 | -0.18 | -0.20 | -0.24 | -0.30 | -0.38 | -0.39 |
| United States | G0645     | 1              | 0.98 | 0.95 | 0.91 | 0.86  | 0.82  | 0.78  | 0.75  | 0.73  | 0.71  | 0.69  | 0.66  | 0.63  | 0.59  | 0.56  | 0.53  | 0.48  | 0.42  |
| United States | G0646     | 1              | 0.90 | 0.77 | 0.66 | 0.58  | 0.50  | 0.43  | 0.38  | 0.34  | 0.30  | 0.27  | 0.23  | 0.21  | 0.19  | 0.20  | 0.19  | 0.19  | 0.18  |
| United States | G0647     | 1              | 1.00 | 0.99 | 0.99 | 0.99  | 0.98  | 0.98  | 0.97  | 0.97  | 0.97  | 0.96  | 0.95  | 0.94  | 0.93  | 0.92  | 0.92  | 0.90  | 0.89  |
| United States | G0648     | 1              | 1.00 | 0.99 | 0.97 | 0.95  | 0.92  | 0.88  | 0.83  | 0.78  | 0.74  | 0.69  | 0.61  | 0.54  | 0.49  | 0.45  | 0.41  | 0.35  | 0.30  |
| United States | G0649     | 1              | 0.97 | 0.91 | 0.88 | 0.85  | 0.82  | 0.78  | 0.76  | 0.73  | 0.69  | 0.67  | 0.61  | 0.55  | 0.50  | 0.47  | 0.43  | 0.36  | 0.29  |
| United States | G0652     | 1              | 0.97 | 0.94 | 0.91 | 0.89  | 0.86  | 0.85  | 0.83  | 0.81  | 0.80  | 0.78  | 0.75  | 0.73  | 0.73  | 0.75  | 0.75  | 0.73  | 0.71  |
| United States | G0653     | 1              | 0.99 | 0.94 | 0.86 | 0.77  | 0.69  | 0.61  | 0.54  | 0.48  | 0.42  | 0.38  | 0.32  | 0.26  | 0.24  | 0.21  | 0.20  | 0.19  | 0.18  |
| United States | G0654     | 1              | 0.95 | 0.84 | 0.73 | 0.68  | 0.63  | 0.57  | 0.55  | 0.54  | 0.51  | 0.48  | 0.47  | 0.44  | 0.44  | 0.41  | 0.39  | 0.36  | 0.35  |
| United States | G0655     | 1              | 1.00 | 1.00 | 0.99 | 0.98  | 0.96  | 0.94  | 0.91  | 0.88  | 0.84  | 0.80  | 0.70  | 0.61  | 0.51  | 0.43  | 0.35  | 0.21  | 0.13  |
| United States | G0656     | 1              | 1.00 | 1.00 | 1.00 | 1.00  | 1.00  | 0.99  | 0.99  | 0.99  | 0.99  | 0.99  | 0.98  | 0.98  | 0.97  | 0.96  | 0.96  | 0.94  | 0.93  |
| United States | G0657     | 1              | 0.99 | 0.97 | 0.93 | 0.89  | 0.85  | 0.82  | 0.79  | 0.76  | 0.71  | 0.68  | 0.61  | 0.58  | 0.53  | 0.50  | 0.47  | 0.40  | 0.36  |
| United States | G0658     | 1              | 0.99 | 0.96 | 0.94 | 0.91  | 0.89  | 0.86  | 0.84  | 0.82  | 0.81  | 0.79  | 0.76  | 0.73  | 0.71  | 0.69  | 0.67  | 0.62  | 0.57  |
| United States | G0659     | 1              | 1.00 | 0.98 | 0.92 | 0.83  | 0.71  | 0.57  | 0.44  | 0.32  | 0.22  | 0.15  | 0.03  | -0.04 | -0.09 | -0.12 | -0.22 | -0.37 | -0.32 |
| United States | G0660     | 1              | 1.00 | 0.98 | 0.95 | 0.89  | 0.83  | 0.78  | 0.73  | 0.68  | 0.64  | 0.60  | 0.50  | 0.43  | 0.40  | 0.37  | 0.33  | 0.25  | 0.21  |
| United States | G0661     | 1              | 1.00 | 1.00 | 0.99 | 0.98  | 0.97  | 0.96  | 0.95  | 0.94  | 0.93  | 0.92  | 0.91  | 0.89  | 0.87  | 0.85  | 0.84  | 0.80  | 0.75  |
| United States | G0662     | 1              | 0.98 | 0.93 | 0.88 | 0.82  | 0.76  | 0.69  | 0.64  | 0.58  | 0.53  | 0.47  | 0.38  | 0.31  | 0.26  | 0.25  | 0.24  | 0.23  | 0.23  |
| United States | G0663     | 1              | 0.99 | 0.94 | 0.82 | 0.67  | 0.52  | 0.39  | 0.29  | 0.20  | 0.13  | 0.08  | 0.00  | -0.05 | -0.07 | -0.08 | -0.07 | -0.04 | 0.00  |
| United States | G0665     | 1              | 0.91 | 0.74 | 0.60 | 0.51  | 0.47  | 0.43  | 0.41  | 0.38  | 0.36  | 0.34  | 0.31  | 0.28  | 0.26  | 0.22  | 0.21  | 0.18  | 0.17  |
| United States | G0666     | 1              | 1.00 | 0.68 | 0.23 | -0.11 | -0.34 | -0.48 | -0.58 | -0.63 | -0.66 | -0.68 | -0.68 | -0.66 | -0.64 | -0.60 | -0.57 | -0.50 | -0.44 |
| United States | G0667     | 1              | 1.00 | 0.98 | 0.95 | 0.90  | 0.85  | 0.81  | 0.76  | 0.71  | 0.67  | 0.63  | 0.54  | 0.47  | 0.43  | 0.39  | 0.34  | 0.27  | 0.22  |
| United States | G0668     | 1              | 0.99 | 0.95 | 0.87 | 0.79  | 0.73  | 0.68  | 0.62  | 0.56  | 0.53  | 0.50  | 0.42  | 0.37  | 0.33  | 0.30  | 0.28  | 0.25  | 0.22  |
| United States | G0669     | 1              | 0.99 | 0.96 | 0.91 | 0.85  | 0.81  | 0.76  | 0.71  | 0.67  | 0.63  | 0.59  | 0.52  | 0.46  | 0.42  | 0.39  | 0.35  | 0.28  | 0.23  |
| United States | G0670     | 1              | 1.00 | 1.00 | 0.99 | 0.98  | 0.97  | 0.94  | 0.91  | 0.87  | 0.82  | 0.78  | 0.69  | 0.60  | 0.53  | 0.46  | 0.41  | 0.30  | 0.22  |
| United States | G0671     | 1              | 1.00 | 1.00 | 0.99 | 0.99  | 0.98  | 0.97  | 0.96  | 0.95  | 0.93  | 0.91  | 0.86  | 0.81  | 0.76  | 0.70  | 0.65  | 0.53  | 0.42  |
| United States | G0673     | 1              | 0.97 | 0.91 | 0.84 | 0.78  | 0.71  | 0.64  | 0.58  | 0.52  | 0.48  | 0.42  | 0.33  | 0.27  | 0.23  | 0.21  | 0.22  | 0.21  | 0.20  |
| United States | G0674     | 1              | 1.00 | 0.86 | 0.44 | 0.02  | -0.28 | -0.47 | -0.59 | -0.67 | -0.71 | -0.73 | -0.75 | -0.73 | -0.70 | -0.69 | -0.67 | -0.61 | -0.54 |
| United States | G0675     | 1              | 1.00 | 0.98 | 0.96 | 0.92  | 0.87  | 0.82  | 0.78  | 0.73  | 0.68  | 0.64  | 0.57  | 0.49  | 0.43  | 0.39  | 0.35  | 0.29  | 0.26  |
| United States | G0676     | 1              | 1.00 | 1.00 | 0.99 | 0.97  | 0.93  | 0.87  | 0.79  | 0.70  | 0.60  | 0.49  | 0.30  | 0.14  | 0.00  | -0.10 | -0.18 | -0.22 | -0.11 |
| United States | G0677     | 1              | 0.99 | 0.96 | 0.92 | 0.88  | 0.84  | 0.80  | 0.77  | 0.73  | 0.71  | 0.68  | 0.63  | 0.59  | 0.56  | 0.53  | 0.50  | 0.42  | 0.38  |

| Country       | GloFAS ID | Station filter | LT1  | LT2  | LT3  | LT4  | LT5  | LT6   | LT7   | LT8   | LT9   | LT10  | LT12  | LT14  | LT16  | LT18  | LT20  | LT25  | L30   |
|---------------|-----------|----------------|------|------|------|------|------|-------|-------|-------|-------|-------|-------|-------|-------|-------|-------|-------|-------|
| United States | G0678     | 1              | 0.99 | 0.97 | 0.95 | 0.94 | 0.92 | 0.91  | 0.89  | 0.87  | 0.85  | 0.82  | 0.78  | 0.74  | 0.69  | 0.65  | 0.62  | 0.53  | 0.46  |
| United States | G0680     | 1              | 1.00 | 0.99 | 0.98 | 0.97 | 0.95 | 0.92  | 0.88  | 0.85  | 0.81  | 0.78  | 0.72  | 0.65  | 0.59  | 0.54  | 0.50  | 0.41  | 0.34  |
| United States | G0681     | 1              | 1.00 | 1.00 | 1.00 | 1.00 | 0.99 | 0.99  | 0.98  | 0.97  | 0.96  | 0.95  | 0.91  | 0.86  | 0.81  | 0.74  | 0.68  | 0.54  | 0.43  |
| United States | G0682     | 1              | 0.92 | 0.87 | 0.81 | 0.76 | 0.72 | 0.69  | 0.65  | 0.60  | 0.57  | 0.53  | 0.48  | 0.44  | 0.41  | 0.37  | 0.34  | 0.29  | 0.28  |
| United States | G0683     | 1              | 0.98 | 0.85 | 0.66 | 0.49 | 0.36 | 0.24  | 0.15  | 0.08  | 0.01  | -0.04 | -0.11 | -0.17 | -0.22 | -0.25 | -0.28 | -0.30 | -0.32 |
| United States | G0685     | 1              | 1.00 | 0.99 | 0.97 | 0.93 | 0.88 | 0.82  | 0.78  | 0.74  | 0.70  | 0.65  | 0.58  | 0.51  | 0.44  | 0.37  | 0.31  | 0.23  | 0.20  |
| United States | G0687     | 1              | 0.98 | 0.96 | 0.92 | 0.89 | 0.84 | 0.79  | 0.74  | 0.71  | 0.67  | 0.62  | 0.55  | 0.48  | 0.43  | 0.39  | 0.35  | 0.29  | 0.26  |
| United States | G0688     | 1              | 1.00 | 0.98 | 0.96 | 0.93 | 0.89 | 0.86  | 0.84  | 0.80  | 0.76  | 0.72  | 0.66  | 0.61  | 0.56  | 0.53  | 0.50  | 0.47  | 0.42  |
| United States | G0690     | 1              | 0.92 | 0.70 | 0.45 | 0.29 | 0.16 | 0.08  | 0.02  | -0.03 | -0.06 | -0.08 | -0.12 | -0.14 | -0.16 | -0.11 | -0.08 | -0.07 | -0.07 |
| United States | G0691     | 1              | 0.99 | 0.97 | 0.92 | 0.88 | 0.83 | 0.78  | 0.74  | 0.72  | 0.68  | 0.64  | 0.59  | 0.53  | 0.49  | 0.45  | 0.41  | 0.37  | 0.35  |
| United States | G0692     | 1              | 0.82 | 0.75 | 0.66 | 0.60 | 0.59 | 0.54  | 0.51  | 0.45  | 0.44  | 0.43  | 0.37  | 0.35  | 0.32  | 0.28  | 0.28  | 0.26  | 0.26  |
| United States | G0693     | 1              | 1.00 | 0.99 | 0.99 | 0.98 | 0.97 | 0.96  | 0.95  | 0.94  | 0.93  | 0.92  | 0.89  | 0.87  | 0.84  | 0.82  | 0.79  | 0.72  | 0.68  |
| United States | G0694     | 1              | 0.98 | 0.90 | 0.77 | 0.61 | 0.44 | 0.30  | 0.17  | 0.05  | -0.04 | -0.12 | -0.23 | -0.30 | -0.35 | -0.42 | -0.54 | -0.61 | -0.57 |
| United States | G0695     | 1              | 1.00 | 0.99 | 0.98 | 0.98 | 0.97 | 0.97  | 0.96  | 0.95  | 0.95  | 0.94  | 0.94  | 0.93  | 0.92  | 0.92  | 0.91  | 0.90  | 0.89  |
| United States | G0696     | 1              | 0.84 | 0.73 | 0.66 | 0.60 | 0.55 | 0.50  | 0.48  | 0.41  | 0.37  | 0.36  | 0.28  | 0.25  | 0.21  | 0.18  | 0.18  | 0.16  | 0.15  |
| United States | G0699     | 1              | 1.00 | 0.99 | 0.96 | 0.93 | 0.90 | 0.86  | 0.82  | 0.78  | 0.74  | 0.70  | 0.64  | 0.57  | 0.50  | 0.45  | 0.41  | 0.33  | 0.29  |
| United States | G0700     | 1              | 1.00 | 1.00 | 1.00 | 1.00 | 0.99 | 0.99  | 0.99  | 0.98  | 0.98  | 0.97  | 0.96  | 0.94  | 0.91  | 0.88  | 0.82  | 0.63  | 0.44  |
| United States | G0701     | 1              | 0.99 | 0.94 | 0.85 | 0.71 | 0.57 | 0.47  | 0.38  | 0.31  | 0.26  | 0.22  | 0.16  | 0.10  | 0.07  | 0.04  | 0.06  | 0.04  | 0.03  |
| United States | G0702     | 1              | 1.00 | 0.99 | 0.98 | 0.96 | 0.94 | 0.92  | 0.89  | 0.86  | 0.84  | 0.82  | 0.77  | 0.72  | 0.67  | 0.61  | 0.57  | 0.47  | 0.39  |
| United States | G0703     | 1              | 1.00 | 0.99 | 0.98 | 0.97 | 0.94 | 0.92  | 0.89  | 0.87  | 0.85  | 0.82  | 0.77  | 0.72  | 0.67  | 0.63  | 0.58  | 0.47  | 0.38  |
| United States | G0705     | 1              | 0.97 | 0.89 | 0.75 | 0.62 | 0.50 | 0.40  | 0.32  | 0.25  | 0.20  | 0.14  | 0.08  | 0.03  | 0.00  | -0.15 | -0.27 | -0.32 | -0.29 |
| United States | G0706     | 1              | 1.00 | 1.00 | 0.99 | 0.98 | 0.97 | 0.95  | 0.94  | 0.93  | 0.92  | 0.91  | 0.88  | 0.86  | 0.84  | 0.83  | 0.82  | 0.79  | 0.76  |
| United States | G0707     | 1              | 1.00 | 0.98 | 0.95 | 0.91 | 0.86 | 0.82  | 0.78  | 0.74  | 0.70  | 0.67  | 0.63  | 0.58  | 0.53  | 0.50  | 0.47  | 0.42  | 0.39  |
| United States | G0708     | 1              | 1.00 | 1.00 | 0.99 | 0.99 | 0.98 | 0.97  | 0.96  | 0.94  | 0.92  | 0.90  | 0.86  | 0.81  | 0.75  | 0.70  | 0.64  | 0.51  | 0.41  |
| United States | G0709     | 1              | 1.00 | 1.00 | 0.99 | 0.99 | 0.97 | 0.96  | 0.93  | 0.90  | 0.86  | 0.82  | 0.70  | 0.58  | 0.46  | 0.35  | 0.25  | 0.09  | 0.04  |
| United States | G0710     | 1              | 0.99 | 0.98 | 0.98 | 0.97 | 0.96 | 0.95  | 0.94  | 0.93  | 0.91  | 0.90  | 0.87  | 0.84  | 0.81  | 0.78  | 0.75  | 0.69  | 0.63  |
| United States | G0711     | 1              | 0.98 | 0.89 | 0.77 | 0.66 | 0.57 | 0.50  | 0.44  | 0.40  | 0.37  | 0.34  | 0.29  | 0.25  | 0.23  | 0.14  | 0.07  | 0.03  | 0.02  |
| United States | G0712     | 1              | 0.80 | 0.60 | 0.45 | 0.32 | 0.23 | 0.16  | 0.10  | 0.05  | 0.01  | -0.02 | -0.08 | -0.11 | -0.09 | -0.01 | 0.04  | 0.07  | 0.09  |
| United States | G0713     | 1              | 1.00 | 1.00 | 0.99 | 0.98 | 0.94 | 0.88  | 0.81  | 0.73  | 0.63  | 0.54  | 0.37  | 0.22  | 0.10  | 0.00  | -0.07 | -0.09 | -0.05 |
| United States | G0714     | 1              | 0.98 | 0.91 | 0.80 | 0.69 | 0.58 | 0.48  | 0.40  | 0.34  | 0.27  | 0.23  | 0.15  | 0.07  | 0.01  | -0.03 | -0.06 | -0.10 | -0.14 |
| United States | G0715     | 1              | 0.86 | 0.73 | 0.63 | 0.53 | 0.42 | 0.34  | 0.26  | 0.18  | 0.11  | 0.07  | -0.02 | -0.08 | -0.10 | -0.05 | -0.03 | 0.01  | 0.01  |
| United States | G0716     | 1              | 1.00 | 1.00 | 0.99 | 0.98 | 0.97 | 0.96  | 0.94  | 0.93  | 0.90  | 0.88  | 0.82  | 0.74  | 0.66  | 0.57  | 0.49  | 0.34  | 0.26  |
| United States | G0717     | 1              | 0.99 | 0.97 | 0.95 | 0.93 | 0.91 | 0.89  | 0.86  | 0.84  | 0.81  | 0.79  | 0.74  | 0.69  | 0.64  | 0.59  | 0.56  | 0.47  | 0.40  |
| United States | G0718     | 1              | 0.94 | 0.80 | 0.69 | 0.58 | 0.48 | 0.39  | 0.31  | 0.23  | 0.16  | 0.10  | 0.03  | -0.02 | -0.06 | -0.02 | 0.00  | 0.04  | 0.04  |
| United States | G0721     | 1              | 0.99 | 0.93 | 0.88 | 0.85 | 0.81 | 0.75  | 0.72  | 0.68  | 0.62  | 0.57  | 0.49  | 0.39  | 0.30  | 0.24  | 0.18  | 0.09  | 0.03  |
| United States | G0722     | 1              | 0.98 | 0.92 | 0.77 | 0.61 | 0.45 | 0.31  | 0.20  | 0.08  | -0.01 | -0.07 | -0.16 | -0.22 | -0.27 | -0.40 | -0.54 | -0.60 | -0.58 |
| United States | G0723     | 1              | 0.97 | 0.78 | 0.48 | 0.21 | 0.02 | -0.09 | -0.18 | -0.25 | -0.28 | -0.30 | -0.34 | -0.34 | -0.35 | -0.38 | -0.41 | -0.38 | -0.36 |
| United States | G0724     | 1              | 0.80 | 0.56 | 0.41 | 0.30 | 0.22 | 0.15  | 0.11  | 0.08  | 0.06  | 0.04  | 0.00  | -0.03 | 0.02  | 0.14  | 0.13  | 0.11  | 0.08  |
| United States | G0725     | 1              | 1.00 | 0.99 | 0.96 | 0.94 | 0.91 | 0.90  | 0.88  | 0.86  | 0.83  | 0.79  | 0.66  | 0.50  | 0.40  | 0.33  | 0.26  | 0.25  | 0.31  |

| Country       | GloFAS ID | Station filter | LT1  | LT2  | LT3  | LT4  | LT5   | LT6   | LT7   | LT8   | LT9   | LT10  | LT12  | LT14  | LT16  | LT18  | LT20  | LT25  | L30   |
|---------------|-----------|----------------|------|------|------|------|-------|-------|-------|-------|-------|-------|-------|-------|-------|-------|-------|-------|-------|
| United States | G0726     | 1              | 0.99 | 0.97 | 0.95 | 0.92 | 0.89  | 0.85  | 0.81  | 0.77  | 0.73  | 0.70  | 0.64  | 0.58  | 0.53  | 0.49  | 0.46  | 0.39  | 0.35  |
| United States | G0727     | 1              | 0.97 | 0.89 | 0.77 | 0.67 | 0.58  | 0.50  | 0.44  | 0.39  | 0.35  | 0.32  | 0.27  | 0.21  | 0.18  | 0.09  | 0.01  | -0.06 | -0.07 |
| United States | G0729     | 1              | 1.00 | 1.00 | 0.99 | 0.98 | 0.96  | 0.95  | 0.94  | 0.92  | 0.91  | 0.89  | 0.86  | 0.83  | 0.80  | 0.77  | 0.75  | 0.68  | 0.62  |
| United States | G0730     | 1              | 1.00 | 1.00 | 1.00 | 0.99 | 0.97  | 0.93  | 0.87  | 0.80  | 0.72  | 0.64  | 0.48  | 0.35  | 0.24  | 0.16  | 0.12  | 0.17  | 0.26  |
| United States | G0731     | 1              | 0.99 | 0.94 | 0.86 | 0.75 | 0.64  | 0.52  | 0.41  | 0.32  | 0.23  | 0.15  | 0.03  | -0.06 | -0.14 | -0.17 | -0.16 | -0.10 | -0.09 |
| United States | G0732     | 1              | 1.00 | 0.99 | 0.98 | 0.97 | 0.96  | 0.94  | 0.92  | 0.90  | 0.88  | 0.85  | 0.78  | 0.69  | 0.60  | 0.51  | 0.43  | 0.30  | 0.23  |
| United States | G0733     | 1              | 0.95 | 0.83 | 0.63 | 0.45 | 0.29  | 0.18  | 0.13  | 0.09  | 0.08  | 0.07  | 0.03  | 0.02  | 0.01  | -0.14 | -0.33 | -0.25 | -0.17 |
| United States | G0734     | 1              | 0.98 | 0.92 | 0.77 | 0.61 | 0.45  | 0.31  | 0.19  | 0.08  | -0.02 | -0.09 | -0.18 | -0.23 | -0.29 | -0.41 | -0.55 | -0.62 | -0.60 |
| United States | G0735     | 1              | 0.99 | 0.96 | 0.91 | 0.85 | 0.79  | 0.72  | 0.67  | 0.62  | 0.58  | 0.53  | 0.47  | 0.39  | 0.33  | 0.28  | 0.24  | 0.17  | 0.11  |
| United States | G0736     | 1              | 0.88 | 0.77 | 0.71 | 0.67 | 0.61  | 0.59  | 0.55  | 0.51  | 0.46  | 0.44  | 0.41  | 0.39  | 0.35  | 0.33  | 0.33  | 0.30  | 0.29  |
| United States | G0739     | 1              | 0.85 | 0.65 | 0.50 | 0.38 | 0.29  | 0.23  | 0.18  | 0.14  | 0.10  | 0.08  | 0.04  | 0.01  | 0.02  | 0.11  | 0.14  | 0.16  | 0.17  |
| United States | G0740     | 1              | 0.99 | 0.97 | 0.96 | 0.94 | 0.91  | 0.88  | 0.86  | 0.83  | 0.80  | 0.77  | 0.71  | 0.66  | 0.59  | 0.54  | 0.49  | 0.39  | 0.34  |
| United States | G0741     | 1              | 1.00 | 0.99 | 0.99 | 0.98 | 0.97  | 0.95  | 0.94  | 0.93  | 0.91  | 0.89  | 0.85  | 0.80  | 0.77  | 0.72  | 0.68  | 0.59  | 0.51  |
| United States | G0742     | 1              | 0.96 | 0.67 | 0.33 | 0.10 | -0.07 | -0.17 | -0.22 | -0.26 | -0.27 | -0.28 | -0.28 | -0.28 | -0.26 | -0.21 | -0.19 | -0.14 | -0.13 |
| United States | G0743     | 1              | 1.00 | 1.00 | 0.99 | 0.99 | 0.97  | 0.96  | 0.94  | 0.91  | 0.89  | 0.86  | 0.80  | 0.73  | 0.67  | 0.62  | 0.58  | 0.47  | 0.39  |
| United States | G0745     | 1              | 1.00 | 0.99 | 0.98 | 0.96 | 0.95  | 0.93  | 0.92  | 0.90  | 0.89  | 0.87  | 0.84  | 0.81  | 0.78  | 0.75  | 0.72  | 0.66  | 0.61  |
| United States | G0747     | 1              | 1.00 | 1.00 | 1.00 | 1.00 | 1.00  | 1.00  | 0.99  | 0.98  | 0.96  | 0.94  | 0.89  | 0.82  | 0.76  | 0.69  | 0.62  | 0.45  | 0.36  |
| United States | G0748     | 1              | 1.00 | 0.99 | 0.98 | 0.97 | 0.95  | 0.93  | 0.91  | 0.90  | 0.88  | 0.86  | 0.82  | 0.79  | 0.75  | 0.71  | 0.67  | 0.57  | 0.51  |
| United States | G0749     | 1              | 1.00 | 0.99 | 0.97 | 0.95 | 0.93  | 0.90  | 0.88  | 0.86  | 0.84  | 0.82  | 0.78  | 0.74  | 0.71  | 0.67  | 0.65  | 0.59  | 0.54  |
| United States | G0750     | 1              | 0.90 | 0.84 | 0.78 | 0.73 | 0.69  | 0.67  | 0.63  | 0.60  | 0.58  | 0.55  | 0.50  | 0.48  | 0.46  | 0.43  | 0.42  | 0.39  | 0.36  |
| United States | G0751     | 1              | 0.98 | 0.90 | 0.74 | 0.52 | 0.34  | 0.19  | 0.09  | 0.04  | 0.01  | 0.00  | -0.03 | -0.05 | -0.06 | -0.05 | -0.12 | -0.09 | -0.07 |
| United States | G0752     | 1              | 0.98 | 0.90 | 0.74 | 0.52 | 0.34  | 0.19  | 0.09  | 0.04  | 0.01  | 0.00  | -0.03 | -0.05 | -0.06 | -0.05 | -0.12 | -0.09 | -0.07 |
| United States | G0753     | 1              | 0.99 | 0.93 | 0.82 | 0.69 | 0.58  | 0.50  | 0.44  | 0.39  | 0.36  | 0.34  | 0.30  | 0.29  | 0.27  | 0.26  | 0.26  | 0.25  | 0.22  |
| United States | G0754     | 1              | 0.99 | 0.96 | 0.93 | 0.88 | 0.84  | 0.80  | 0.76  | 0.72  | 0.68  | 0.64  | 0.57  | 0.52  | 0.47  | 0.43  | 0.39  | 0.31  | 0.25  |
| United States | G0755     | 1              | 0.99 | 0.97 | 0.94 | 0.92 | 0.90  | 0.88  | 0.86  | 0.84  | 0.81  | 0.79  | 0.74  | 0.69  | 0.64  | 0.59  | 0.54  | 0.45  | 0.38  |
| United States | G0756     | 1              | 1.00 | 1.00 | 0.99 | 0.99 | 0.97  | 0.93  | 0.88  | 0.81  | 0.74  | 0.65  | 0.48  | 0.32  | 0.18  | 0.08  | 0.00  | -0.05 | 0.01  |
| United States | G0757     | 1              | 1.00 | 0.98 | 0.95 | 0.91 | 0.84  | 0.77  | 0.70  | 0.63  | 0.57  | 0.51  | 0.41  | 0.33  | 0.28  | 0.26  | 0.28  | 0.34  | 0.34  |
| United States | G0758     | 1              | 0.97 | 0.92 | 0.88 | 0.85 | 0.82  | 0.80  | 0.77  | 0.75  | 0.73  | 0.70  | 0.65  | 0.62  | 0.60  | 0.57  | 0.55  | 0.49  | 0.46  |
| United States | G0759     | 1              | 0.97 | 0.84 | 0.69 | 0.57 | 0.47  | 0.39  | 0.33  | 0.28  | 0.24  | 0.21  | 0.16  | 0.12  | 0.09  | 0.12  | 0.13  | 0.11  | 0.10  |
| United States | G0760     | 1              | 1.00 | 0.99 | 0.96 | 0.92 | 0.87  | 0.83  | 0.78  | 0.71  | 0.65  | 0.58  | 0.48  | 0.41  | 0.34  | 0.31  | 0.27  | 0.20  | 0.17  |
| United States | G0761     | 1              | 0.99 | 0.98 | 0.96 | 0.94 | 0.91  | 0.88  | 0.86  | 0.84  | 0.82  | 0.80  | 0.76  | 0.71  | 0.68  | 0.65  | 0.62  | 0.56  | 0.52  |
| United States | G0763     | 1              | 0.97 | 0.90 | 0.82 | 0.76 | 0.70  | 0.65  | 0.62  | 0.57  | 0.54  | 0.51  | 0.46  | 0.42  | 0.39  | 0.37  | 0.33  | 0.29  | 0.24  |
| United States | G0764     | 1              | 0.99 | 0.97 | 0.95 | 0.93 | 0.91  | 0.88  | 0.86  | 0.84  | 0.82  | 0.80  | 0.75  | 0.70  | 0.65  | 0.61  | 0.57  | 0.49  | 0.43  |
| United States | G0766     | 1              | 0.84 | 0.71 | 0.63 | 0.58 | 0.54  | 0.52  | 0.49  | 0.46  | 0.45  | 0.43  | 0.39  | 0.35  | 0.33  | 0.31  | 0.29  | 0.24  | 0.21  |
| United States | G0767     | 1              | 0.99 | 0.96 | 0.90 | 0.82 | 0.73  | 0.66  | 0.60  | 0.55  | 0.50  | 0.47  | 0.42  | 0.38  | 0.35  | 0.33  | 0.31  | 0.28  | 0.24  |
| United States | G0768     | 1              | 1.00 | 0.99 | 0.96 | 0.90 | 0.83  | 0.76  | 0.68  | 0.61  | 0.55  | 0.49  | 0.41  | 0.34  | 0.29  | 0.25  | 0.22  | 0.18  | 0.15  |
| United States | G0769     | 1              | 0.99 | 0.96 | 0.93 | 0.89 | 0.86  | 0.82  | 0.78  | 0.75  | 0.72  | 0.68  | 0.63  | 0.58  | 0.54  | 0.49  | 0.46  | 0.39  | 0.34  |
| United States | G0770     | 1              | 0.99 | 0.93 | 0.82 | 0.70 | 0.59  | 0.49  | 0.41  | 0.34  | 0.30  | 0.26  | 0.19  | 0.14  | 0.10  | 0.06  | 0.00  | -0.05 | -0.07 |
| United States | G0771     | 1              | 1.00 | 0.99 | 0.96 | 0.90 | 0.81  | 0.70  | 0.58  | 0.46  | 0.36  | 0.26  | 0.09  | -0.05 | -0.15 | -0.22 | -0.26 | -0.21 | -0.17 |

| Country       | GloFAS ID | Station filter | LT1  | LT2  | LT3  | LT4  | LT5  | LT6  | LT7  | LT8  | LT9  | LT10 | LT12 | LT14 | LT16 | LT18 | LT20 | LT25 | L30  |
|---------------|-----------|----------------|------|------|------|------|------|------|------|------|------|------|------|------|------|------|------|------|------|
| United States | G0772     | 1              | 1.00 | 0.99 | 0.99 | 0.98 | 0.97 | 0.96 | 0.95 | 0.94 | 0.93 | 0.92 | 0.90 | 0.88 | 0.86 | 0.84 | 0.82 | 0.77 | 0.72 |
| United States | G0773     | 1              | 0.97 | 0.79 | 0.59 | 0.45 | 0.35 | 0.28 | 0.24 | 0.21 | 0.19 | 0.18 | 0.16 | 0.15 | 0.14 | 0.12 | 0.12 | 0.10 | 0.07 |
| United States | G0774     | 1              | 0.99 | 0.93 | 0.82 | 0.70 | 0.59 | 0.50 | 0.42 | 0.35 | 0.29 | 0.24 | 0.16 | 0.10 | 0.05 | 0.05 | 0.10 | 0.15 | 0.16 |
| United States | G0775     | 1              | 0.96 | 0.88 | 0.80 | 0.74 | 0.68 | 0.63 | 0.58 | 0.53 | 0.50 | 0.46 | 0.39 | 0.36 | 0.32 | 0.29 | 0.27 | 0.24 | 0.22 |
| United States | G0776     | 1              | 0.94 | 0.88 | 0.79 | 0.74 | 0.70 | 0.64 | 0.60 | 0.59 | 0.57 | 0.52 | 0.48 | 0.44 | 0.43 | 0.40 | 0.38 | 0.35 | 0.33 |
| United States | G0777     | 1              | 0.99 | 0.98 | 0.95 | 0.93 | 0.91 | 0.88 | 0.86 | 0.83 | 0.81 | 0.79 | 0.74 | 0.69 | 0.64 | 0.60 | 0.56 | 0.48 | 0.42 |
| United States | G0780     | 1              | 0.88 | 0.76 | 0.69 | 0.62 | 0.59 | 0.57 | 0.55 | 0.51 | 0.49 | 0.47 | 0.43 | 0.42 | 0.40 | 0.39 | 0.40 | 0.35 | 0.34 |
| United States | G0781     | 1              | 0.99 | 0.93 | 0.82 | 0.72 | 0.61 | 0.51 | 0.44 | 0.38 | 0.32 | 0.28 | 0.21 | 0.16 | 0.12 | 0.10 | 0.09 | 0.08 | 0.04 |
| United States | G0782     | 1              | 0.99 | 0.93 | 0.83 | 0.73 | 0.62 | 0.53 | 0.45 | 0.39 | 0.33 | 0.29 | 0.21 | 0.16 | 0.12 | 0.10 | 0.08 | 0.08 | 0.04 |
| United States | G0783     | 1              | 0.97 | 0.89 | 0.82 | 0.76 | 0.71 | 0.66 | 0.62 | 0.57 | 0.53 | 0.51 | 0.43 | 0.40 | 0.36 | 0.33 | 0.31 | 0.27 | 0.24 |
| United States | G0785     | 1              | 0.99 | 0.98 | 0.95 | 0.93 | 0.91 | 0.88 | 0.86 | 0.83 | 0.81 | 0.79 | 0.74 | 0.69 | 0.64 | 0.59 | 0.56 | 0.48 | 0.42 |
| United States | G0786     | 1              | 0.99 | 0.97 | 0.91 | 0.85 | 0.77 | 0.70 | 0.63 | 0.58 | 0.53 | 0.49 | 0.43 | 0.38 | 0.33 | 0.29 | 0.24 | 0.18 | 0.14 |
| United States | G0787     | 1              | 0.92 | 0.78 | 0.71 | 0.66 | 0.62 | 0.60 | 0.57 | 0.55 | 0.54 | 0.53 | 0.50 | 0.48 | 0.48 | 0.51 | 0.51 | 0.50 | 0.48 |
| United States | G0788     | 1              | 1.00 | 1.00 | 0.99 | 0.97 | 0.94 | 0.90 | 0.86 | 0.82 | 0.78 | 0.74 | 0.69 | 0.63 | 0.57 | 0.52 | 0.49 | 0.41 | 0.36 |
| United States | G0789     | 1              | 0.97 | 0.89 | 0.79 | 0.72 | 0.68 | 0.64 | 0.61 | 0.57 | 0.54 | 0.52 | 0.50 | 0.47 | 0.46 | 0.43 | 0.41 | 0.37 | 0.34 |
| United States | G0790     | 1              | 0.92 | 0.82 | 0.76 | 0.70 | 0.66 | 0.59 | 0.55 | 0.54 | 0.50 | 0.48 | 0.44 | 0.39 | 0.35 | 0.32 | 0.33 | 0.28 | 0.27 |
| United States | G0791     | 1              | 0.88 | 0.76 | 0.70 | 0.65 | 0.62 | 0.60 | 0.57 | 0.56 | 0.55 | 0.54 | 0.52 | 0.50 | 0.51 | 0.54 | 0.54 | 0.52 | 0.50 |
| United States | G0793     | 1              | 0.94 | 0.84 | 0.77 | 0.72 | 0.66 | 0.61 | 0.57 | 0.51 | 0.47 | 0.45 | 0.38 | 0.35 | 0.30 | 0.28 | 0.26 | 0.24 | 0.21 |
| United States | G0794     | 1              | 0.90 | 0.80 | 0.73 | 0.66 | 0.59 | 0.55 | 0.49 | 0.46 | 0.42 | 0.40 | 0.33 | 0.28 | 0.29 | 0.30 | 0.29 | 0.25 | 0.24 |
| United States | G0795     | 1              | 1.00 | 1.00 | 1.00 | 1.00 | 1.00 | 1.00 | 0.99 | 0.99 | 0.99 | 0.99 | 0.98 | 0.97 | 0.96 | 0.94 | 0.91 | 0.87 | 0.85 |
| United States | G0796     | 1              | 1.00 | 0.98 | 0.96 | 0.92 | 0.85 | 0.77 | 0.72 | 0.69 | 0.64 | 0.58 | 0.51 | 0.43 | 0.37 | 0.32 | 0.28 | 0.26 | 0.23 |
| United States | G0797     | 1              | 0.84 | 0.74 | 0.69 | 0.66 | 0.63 | 0.61 | 0.59 | 0.58 | 0.57 | 0.57 | 0.54 | 0.53 | 0.55 | 0.57 | 0.57 | 0.54 | 0.52 |
| United States | G0798     | 1              | 1.00 | 1.00 | 0.99 | 0.99 | 0.98 | 0.96 | 0.95 | 0.93 | 0.91 | 0.89 | 0.85 | 0.80 | 0.75 | 0.69 | 0.64 | 0.51 | 0.40 |
| United States | G0799     | 1              | 1.00 | 0.98 | 0.96 | 0.93 | 0.90 | 0.85 | 0.81 | 0.78 | 0.74 | 0.69 | 0.59 | 0.50 | 0.42 | 0.36 | 0.31 | 0.18 | 0.16 |
| United States | G0800     | 1              | 1.00 | 0.99 | 0.97 | 0.96 | 0.95 | 0.94 | 0.93 | 0.92 | 0.91 | 0.90 | 0.88 | 0.86 | 0.84 | 0.82 | 0.80 | 0.76 | 0.72 |
| United States | G0801     | 1              | 1.00 | 1.00 | 0.99 | 0.99 | 0.98 | 0.97 | 0.96 | 0.94 | 0.93 | 0.91 | 0.88 | 0.83 | 0.79 | 0.74 | 0.70 | 0.57 | 0.45 |
| United States | G0802     | 1              | 1.00 | 1.00 | 0.99 | 0.99 | 0.98 | 0.98 | 0.97 | 0.97 | 0.96 | 0.95 | 0.94 | 0.92 | 0.89 | 0.87 | 0.84 | 0.77 | 0.72 |
| United States | G0805     | 1              | 0.84 | 0.65 | 0.52 | 0.43 | 0.36 | 0.30 | 0.26 | 0.23 | 0.21 | 0.20 | 0.15 | 0.12 | 0.12 | 0.20 | 0.21 | 0.22 | 0.21 |
| United States | G0806     | 1              | 0.95 | 0.84 | 0.76 | 0.71 | 0.65 | 0.60 | 0.57 | 0.51 | 0.47 | 0.44 | 0.37 | 0.35 | 0.30 | 0.29 | 0.26 | 0.26 | 0.23 |
| United States | G0807     | 1              | 0.99 | 0.97 | 0.94 | 0.92 | 0.90 | 0.88 | 0.86 | 0.84 | 0.83 | 0.81 | 0.79 | 0.76 | 0.74 | 0.72 | 0.69 | 0.65 | 0.61 |
| United States | G0809     | 1              | 0.96 | 0.93 | 0.90 | 0.88 | 0.85 | 0.84 | 0.81 | 0.79 | 0.77 | 0.75 | 0.70 | 0.67 | 0.63 | 0.60 | 0.56 | 0.50 | 0.44 |
| United States | G0810     | 1              | 0.99 | 0.99 | 0.99 | 0.98 | 0.98 | 0.98 | 0.98 | 0.97 | 0.97 | 0.97 | 0.96 | 0.95 | 0.93 | 0.91 | 0.89 | 0.85 | 0.83 |
| United States | G0811     | 1              | 0.99 | 0.98 | 0.97 | 0.96 | 0.94 | 0.92 | 0.91 | 0.88 | 0.87 | 0.85 | 0.82 | 0.78 | 0.74 | 0.71 | 0.67 | 0.59 | 0.52 |
| United States | G0812     | 1              | 1.00 | 0.99 | 0.96 | 0.93 | 0.89 | 0.84 | 0.79 | 0.75 | 0.71 | 0.67 | 0.59 | 0.51 | 0.45 | 0.39 | 0.35 | 0.26 | 0.20 |
| United States | G0813     | 1              | 0.99 | 0.97 | 0.93 | 0.87 | 0.82 | 0.77 | 0.73 | 0.67 | 0.62 | 0.58 | 0.53 | 0.46 | 0.40 | 0.37 | 0.33 | 0.26 | 0.22 |
| United States | G0815     | 1              | 0.99 | 0.99 | 0.98 | 0.98 | 0.98 | 0.97 | 0.97 | 0.96 | 0.96 | 0.96 | 0.96 | 0.95 | 0.95 | 0.94 | 0.93 | 0.93 | 0.93 |
| United States | G0817     | 1              | 0.94 | 0.89 | 0.82 | 0.76 | 0.71 | 0.67 | 0.61 | 0.58 | 0.57 | 0.55 | 0.49 | 0.46 | 0.44 | 0.41 | 0.39 | 0.34 | 0.29 |
| United States | G0818     | 1              | 0.95 | 0.90 | 0.84 | 0.78 | 0.73 | 0.69 | 0.64 | 0.61 | 0.60 | 0.58 | 0.52 | 0.49 | 0.47 | 0.43 | 0.41 | 0.35 | 0.30 |
| United States | G0819     | 1              | 0.97 | 0.93 | 0.90 | 0.84 | 0.82 | 0.80 | 0.75 | 0.74 | 0.73 | 0.72 | 0.66 | 0.62 | 0.61 | 0.55 | 0.53 | 0.43 | 0.36 |



| Country       | GloFAS ID | Station filter | LT1  | LT2  | LT3  | LT4  | LT5  | LT6  | LT7  | LT8  | LT9  | LT10 | LT12 | LT14 | LT16 | LT18 | LT20 | LT25 | L30  |
|---------------|-----------|----------------|------|------|------|------|------|------|------|------|------|------|------|------|------|------|------|------|------|
| United States | G0820     | 1              | 1.00 | 0.99 | 0.98 | 0.97 | 0.95 | 0.93 | 0.92 | 0.91 | 0.90 | 0.89 | 0.88 | 0.85 | 0.83 | 0.82 | 0.80 | 0.77 | 0.76 |
| United States | G0821     | 1              | 0.99 | 0.94 | 0.88 | 0.82 | 0.77 | 0.72 | 0.66 | 0.62 | 0.58 | 0.55 | 0.49 | 0.43 | 0.38 | 0.34 | 0.32 | 0.31 | 0.26 |
| United States | G0822     | 1              | 1.00 | 0.96 | 0.89 | 0.79 | 0.70 | 0.61 | 0.54 | 0.47 | 0.42 | 0.37 | 0.31 | 0.26 | 0.21 | 0.20 | 0.22 | 0.28 | 0.29 |
| United States | G0824     | 1              | 1.00 | 0.98 | 0.95 | 0.92 | 0.87 | 0.83 | 0.78 | 0.74 | 0.70 | 0.66 | 0.59 | 0.51 | 0.45 | 0.39 | 0.35 | 0.26 | 0.21 |
| United States | G0825     | 1              | 0.98 | 0.88 | 0.80 | 0.74 | 0.70 | 0.67 | 0.64 | 0.62 | 0.60 | 0.59 | 0.56 | 0.54 | 0.51 | 0.49 | 0.47 | 0.44 | 0.41 |
| United States | G0826     | 1              | 0.99 | 0.94 | 0.88 | 0.83 | 0.79 | 0.75 | 0.71 | 0.68 | 0.65 | 0.63 | 0.57 | 0.52 | 0.48 | 0.44 | 0.40 | 0.34 | 0.30 |
| United States | G0827     | 1              | 0.99 | 0.97 | 0.93 | 0.88 | 0.82 | 0.76 | 0.69 | 0.62 | 0.56 | 0.50 | 0.41 | 0.33 | 0.28 | 0.25 | 0.22 | 0.19 | 0.18 |
| United States | G0828     | 1              | 0.95 | 0.89 | 0.86 | 0.83 | 0.76 | 0.70 | 0.67 | 0.62 | 0.59 | 0.56 | 0.50 | 0.47 | 0.42 | 0.41 | 0.36 | 0.32 | 0.25 |
| United States | G0829     | 1              | 0.98 | 0.97 | 0.95 | 0.95 | 0.93 | 0.90 | 0.88 | 0.87 | 0.85 | 0.83 | 0.81 | 0.77 | 0.75 | 0.72 | 0.69 | 0.63 | 0.57 |
| United States | G0830     | 1              | 1.00 | 0.98 | 0.97 | 0.95 | 0.94 | 0.92 | 0.91 | 0.89 | 0.88 | 0.86 | 0.83 | 0.80 | 0.77 | 0.74 | 0.70 | 0.62 | 0.53 |
| United States | G0831     | 1              | 1.00 | 1.00 | 0.99 | 0.99 | 0.98 | 0.97 | 0.96 | 0.94 | 0.92 | 0.90 | 0.86 | 0.81 | 0.75 | 0.70 | 0.64 | 0.53 | 0.43 |
| United States | G0832     | 1              | 0.98 | 0.92 | 0.87 | 0.83 | 0.77 | 0.72 | 0.68 | 0.65 | 0.61 | 0.57 | 0.52 | 0.47 | 0.41 | 0.36 | 0.35 | 0.28 | 0.22 |
| United States | G0834     | 1              | 0.98 | 0.88 | 0.69 | 0.54 | 0.42 | 0.32 | 0.27 | 0.23 | 0.19 | 0.16 | 0.13 | 0.10 | 0.09 | 0.11 | 0.09 | 0.09 | 0.06 |
| United States | G0835     | 1              | 0.99 | 0.94 | 0.88 | 0.83 | 0.80 | 0.77 | 0.74 | 0.72 | 0.69 | 0.66 | 0.61 | 0.57 | 0.53 | 0.49 | 0.46 | 0.38 | 0.33 |
| United States | G0836     | 1              | 1.00 | 0.99 | 0.98 | 0.96 | 0.92 | 0.89 | 0.85 | 0.81 | 0.78 | 0.74 | 0.68 | 0.63 | 0.58 | 0.54 | 0.50 | 0.42 | 0.36 |
| United States | G0837     | 1              | 0.95 | 0.88 | 0.83 | 0.77 | 0.70 | 0.66 | 0.62 | 0.59 | 0.55 | 0.51 | 0.46 | 0.41 | 0.36 | 0.33 | 0.32 | 0.25 | 0.18 |
| United States | G0838     | 1              | 0.90 | 0.78 | 0.69 | 0.63 | 0.58 | 0.53 | 0.47 | 0.43 | 0.39 | 0.35 | 0.30 | 0.24 | 0.21 | 0.20 | 0.20 | 0.17 | 0.17 |
| United States | G0839     | 1              | 0.90 | 0.82 | 0.77 | 0.70 | 0.66 | 0.61 | 0.59 | 0.57 | 0.55 | 0.52 | 0.46 | 0.43 | 0.41 | 0.38 | 0.36 | 0.31 | 0.30 |
| United States | G0840     | 1              | 0.91 | 0.79 | 0.70 | 0.64 | 0.58 | 0.54 | 0.48 | 0.44 | 0.40 | 0.36 | 0.30 | 0.25 | 0.22 | 0.21 | 0.20 | 0.17 | 0.18 |
| United States | G0841     | 1              | 0.99 | 0.95 | 0.92 | 0.90 | 0.89 | 0.87 | 0.85 | 0.84 | 0.82 | 0.80 | 0.77 | 0.72 | 0.68 | 0.62 | 0.57 | 0.47 | 0.38 |
| United States | G0842     | 1              | 0.99 | 0.95 | 0.88 | 0.81 | 0.71 | 0.66 | 0.65 | 0.63 | 0.60 | 0.57 | 0.51 | 0.45 | 0.38 | 0.34 | 0.32 | 0.22 | 0.15 |
| United States | G0843     | 1              | 0.99 | 0.96 | 0.86 | 0.73 | 0.59 | 0.47 | 0.37 | 0.32 | 0.27 | 0.23 | 0.18 | 0.14 | 0.13 | 0.12 | 0.12 | 0.10 | 0.07 |
| United States | G0844     | 1              | 1.00 | 0.98 | 0.94 | 0.89 | 0.83 | 0.78 | 0.73 | 0.67 | 0.62 | 0.57 | 0.50 | 0.43 | 0.37 | 0.32 | 0.29 | 0.24 | 0.21 |
| United States | G0845     | 1              | 0.98 | 0.90 | 0.84 | 0.79 | 0.73 | 0.68 | 0.66 | 0.63 | 0.59 | 0.57 | 0.54 | 0.52 | 0.49 | 0.50 | 0.48 | 0.46 | 0.43 |
| United States | G0846     | 1              | 1.00 | 0.97 | 0.94 | 0.93 | 0.92 | 0.87 | 0.80 | 0.78 | 0.74 | 0.68 | 0.64 | 0.55 | 0.50 | 0.44 | 0.43 | 0.36 | 0.31 |
| United States | G0847     | 1              | 1.00 | 0.99 | 0.97 | 0.94 | 0.89 | 0.83 | 0.77 | 0.71 | 0.67 | 0.63 | 0.55 | 0.47 | 0.41 | 0.36 | 0.33 | 0.25 | 0.18 |
| United States | G0848     | 1              | 0.99 | 0.95 | 0.89 | 0.84 | 0.80 | 0.75 | 0.71 | 0.67 | 0.64 | 0.61 | 0.55 | 0.51 | 0.47 | 0.43 | 0.40 | 0.33 | 0.27 |
| United States | G0849     | 1              | 0.93 | 0.86 | 0.81 | 0.75 | 0.70 | 0.65 | 0.61 | 0.59 | 0.57 | 0.54 | 0.49 | 0.44 | 0.41 | 0.38 | 0.36 | 0.31 | 0.29 |
| United States | G0850     | 1              | 0.99 | 0.97 | 0.95 | 0.93 | 0.89 | 0.85 | 0.82 | 0.78 | 0.72 | 0.69 | 0.63 | 0.56 | 0.51 | 0.48 | 0.44 | 0.38 | 0.34 |
| United States | G0851     | 1              | 0.98 | 0.91 | 0.84 | 0.78 | 0.73 | 0.69 | 0.65 | 0.61 | 0.57 | 0.54 | 0.50 | 0.46 | 0.43 | 0.42 | 0.40 | 0.36 | 0.32 |
| United States | G0852     | 1              | 0.98 | 0.94 | 0.89 | 0.85 | 0.81 | 0.78 | 0.75 | 0.72 | 0.70 | 0.68 | 0.65 | 0.63 | 0.60 | 0.57 | 0.54 | 0.49 | 0.44 |
| United States | G0853     | 1              | 1.00 | 0.97 | 0.90 | 0.84 | 0.79 | 0.74 | 0.69 | 0.66 | 0.63 | 0.60 | 0.56 | 0.53 | 0.51 | 0.49 | 0.49 | 0.46 | 0.43 |
| United States | G0854     | 1              | 1.00 | 0.99 | 0.99 | 0.98 | 0.97 | 0.97 | 0.96 | 0.95 | 0.93 | 0.92 | 0.90 | 0.89 | 0.86 | 0.84 | 0.82 | 0.74 | 0.68 |
| United States | G0855     | 1              | 0.99 | 0.95 | 0.89 | 0.83 | 0.77 | 0.71 | 0.63 | 0.58 | 0.58 | 0.56 | 0.49 | 0.45 | 0.40 | 0.37 | 0.33 | 0.27 | 0.23 |
| United States | G0856     | 1              | 1.00 | 0.98 | 0.95 | 0.92 | 0.88 | 0.84 | 0.80 | 0.77 | 0.73 | 0.70 | 0.65 | 0.60 | 0.57 | 0.53 | 0.50 | 0.45 | 0.42 |
| United States | G0857     | 1              | 0.94 | 0.87 | 0.79 | 0.73 | 0.69 | 0.65 | 0.60 | 0.56 | 0.55 | 0.51 | 0.47 | 0.41 | 0.39 | 0.38 | 0.37 | 0.32 | 0.29 |
| United States | G0858     | 1              | 1.00 | 0.99 | 0.94 | 0.87 | 0.79 | 0.71 | 0.65 | 0.61 | 0.58 | 0.55 | 0.49 | 0.44 | 0.41 | 0.38 | 0.36 | 0.31 | 0.26 |
| United States | G0859     | 1              | 1.00 | 1.00 | 0.99 | 0.98 | 0.97 | 0.95 | 0.93 | 0.90 | 0.87 | 0.84 | 0.78 | 0.72 | 0.66 | 0.62 | 0.59 | 0.50 | 0.40 |
| United States | G0860     | 1              | 1.00 | 0.99 | 0.97 | 0.93 | 0.89 | 0.86 | 0.82 | 0.77 | 0.74 | 0.70 | 0.65 | 0.61 | 0.57 | 0.54 | 0.51 | 0.44 | 0.39 |



| Country       | GloFAS ID | Station filter | LT1  | LT2  | LT3  | LT4  | LT5  | LT6  | LT7  | LT8  | LT9  | LT10 | LT12 | LT14 | LT16 | LT18 | LT20 | LT25 | L30  |
|---------------|-----------|----------------|------|------|------|------|------|------|------|------|------|------|------|------|------|------|------|------|------|
| United States | G0861     | 1              | 0.98 | 0.88 | 0.73 | 0.62 | 0.54 | 0.48 | 0.44 | 0.40 | 0.37 | 0.34 | 0.30 | 0.26 | 0.24 | 0.21 | 0.19 | 0.15 | 0.12 |
| United States | G0863     | 1              | 0.98 | 0.93 | 0.86 | 0.76 | 0.67 | 0.63 | 0.59 | 0.56 | 0.56 | 0.55 | 0.48 | 0.45 | 0.41 | 0.38 | 0.38 | 0.34 | 0.32 |
| United States | G0865     | 1              | 1.00 | 0.97 | 0.92 | 0.86 | 0.82 | 0.78 | 0.74 | 0.71 | 0.67 | 0.64 | 0.59 | 0.54 | 0.51 | 0.47 | 0.45 | 0.38 | 0.33 |
| United States | G0866     | 1              | 1.00 | 0.99 | 0.97 | 0.93 | 0.89 | 0.83 | 0.78 | 0.73 | 0.69 | 0.66 | 0.59 | 0.54 | 0.49 | 0.45 | 0.42 | 0.35 | 0.29 |
| United States | G0867     | 1              | 1.00 | 1.00 | 0.99 | 0.98 | 0.97 | 0.96 | 0.93 | 0.91 | 0.88 | 0.85 | 0.79 | 0.74 | 0.68 | 0.64 | 0.60 | 0.52 | 0.45 |
| United States | G0868     | 1              | 1.00 | 0.99 | 0.97 | 0.94 | 0.88 | 0.81 | 0.77 | 0.74 | 0.69 | 0.67 | 0.62 | 0.55 | 0.49 | 0.45 | 0.40 | 0.33 | 0.27 |
| United States | G0869     | 1              | 0.98 | 0.94 | 0.91 | 0.87 | 0.85 | 0.84 | 0.83 | 0.79 | 0.77 | 0.76 | 0.72 | 0.72 | 0.68 | 0.67 | 0.67 | 0.64 | 0.63 |
| United States | G0870     | 1              | 1.00 | 1.00 | 0.98 | 0.95 | 0.91 | 0.88 | 0.83 | 0.78 | 0.74 | 0.72 | 0.66 | 0.61 | 0.58 | 0.55 | 0.52 | 0.46 | 0.42 |
| United States | G0871     | 1              | 1.00 | 0.99 | 0.99 | 0.98 | 0.98 | 0.98 | 0.98 | 0.97 | 0.97 | 0.97 | 0.97 | 0.96 | 0.96 | 0.96 | 0.96 | 0.95 | 0.94 |
| United States | G0872     | 1              | 1.00 | 1.00 | 1.00 | 1.00 | 1.00 | 1.00 | 0.99 | 0.98 | 0.97 | 0.97 | 0.94 | 0.91 | 0.85 | 0.81 | 0.76 | 0.67 | 0.58 |
| United States | G0873     | 1              | 1.00 | 0.99 | 0.99 | 0.99 | 0.98 | 0.98 | 0.97 | 0.97 | 0.96 | 0.96 | 0.95 | 0.93 | 0.91 | 0.90 | 0.88 | 0.85 | 0.82 |
| United States | G0876     | 1              | 1.00 | 1.00 | 0.99 | 0.99 | 0.98 | 0.97 | 0.96 | 0.95 | 0.94 | 0.93 | 0.90 | 0.87 | 0.84 | 0.81 | 0.77 | 0.69 | 0.61 |
| United States | G0877     | 1              | 0.99 | 0.96 | 0.91 | 0.88 | 0.85 | 0.83 | 0.81 | 0.80 | 0.78 | 0.76 | 0.75 | 0.73 | 0.72 | 0.71 | 0.71 | 0.68 | 0.66 |
| United States | G0878     | 1              | 0.99 | 0.94 | 0.85 | 0.75 | 0.67 | 0.62 | 0.58 | 0.53 | 0.49 | 0.47 | 0.42 | 0.38 | 0.35 | 0.32 | 0.30 | 0.25 | 0.21 |
| United States | G0879     | 1              | 1.00 | 0.99 | 0.97 | 0.94 | 0.91 | 0.88 | 0.84 | 0.81 | 0.77 | 0.74 | 0.66 | 0.60 | 0.54 | 0.48 | 0.44 | 0.35 | 0.29 |
| United States | G0880     | 1              | 1.00 | 1.00 | 1.00 | 0.99 | 0.99 | 0.98 | 0.97 | 0.96 | 0.94 | 0.93 | 0.87 | 0.80 | 0.71 | 0.64 | 0.57 | 0.43 | 0.33 |
| United States | G0882     | 1              | 1.00 | 0.99 | 0.99 | 0.98 | 0.97 | 0.96 | 0.96 | 0.96 | 0.95 | 0.95 | 0.93 | 0.92 | 0.90 | 0.88 | 0.87 | 0.83 | 0.79 |
| United States | G0883     | 1              | 0.98 | 0.95 | 0.86 | 0.77 | 0.70 | 0.64 | 0.60 | 0.56 | 0.52 | 0.49 | 0.44 | 0.40 | 0.36 | 0.34 | 0.32 | 0.26 | 0.22 |
| United States | G0884     | 1              | 1.00 | 0.99 | 0.98 | 0.97 | 0.95 | 0.93 | 0.91 | 0.88 | 0.85 | 0.82 | 0.76 | 0.71 | 0.67 | 0.63 | 0.59 | 0.51 | 0.46 |
| United States | G0885     | 1              | 1.00 | 0.99 | 0.98 | 0.96 | 0.94 | 0.92 | 0.90 | 0.88 | 0.86 | 0.84 | 0.81 | 0.78 | 0.76 | 0.73 | 0.71 | 0.64 | 0.58 |
| United States | G0886     | 1              | 0.98 | 0.92 | 0.86 | 0.82 | 0.78 | 0.77 | 0.75 | 0.72 | 0.70 | 0.69 | 0.65 | 0.63 | 0.60 | 0.58 | 0.56 | 0.51 | 0.47 |
| United States | G0887     | 1              | 0.99 | 0.94 | 0.84 | 0.78 | 0.72 | 0.67 | 0.64 | 0.57 | 0.56 | 0.55 | 0.54 | 0.52 | 0.48 | 0.45 | 0.44 | 0.41 | 0.40 |
| United States | G0888     | 1              | 1.00 | 0.99 | 0.97 | 0.96 | 0.95 | 0.94 | 0.93 | 0.91 | 0.88 | 0.86 | 0.82 | 0.79 | 0.75 | 0.72 | 0.70 | 0.62 | 0.57 |
| United States | G0889     | 1              | 1.00 | 1.00 | 1.00 | 0.99 | 0.99 | 0.98 | 0.97 | 0.96 | 0.95 | 0.93 | 0.90 | 0.85 | 0.79 | 0.72 | 0.65 | 0.50 | 0.38 |
| United States | G0890     | 1              | 0.99 | 0.93 | 0.84 | 0.77 | 0.72 | 0.67 | 0.64 | 0.61 | 0.58 | 0.55 | 0.50 | 0.46 | 0.43 | 0.40 | 0.38 | 0.33 | 0.30 |
| United States | G0891     | 1              | 1.00 | 0.99 | 0.97 | 0.95 | 0.93 | 0.90 | 0.87 | 0.84 | 0.81 | 0.78 | 0.72 | 0.68 | 0.63 | 0.60 | 0.57 | 0.50 | 0.45 |
| United States | G0892     | 1              | 0.99 | 0.96 | 0.90 | 0.83 | 0.78 | 0.74 | 0.71 | 0.69 | 0.65 | 0.63 | 0.58 | 0.55 | 0.52 | 0.50 | 0.48 | 0.43 | 0.40 |
| United States | G0894     | 1              | 0.95 | 0.87 | 0.76 | 0.71 | 0.67 | 0.62 | 0.52 | 0.51 | 0.51 | 0.46 | 0.44 | 0.39 | 0.42 | 0.37 | 0.38 | 0.31 | 0.32 |
| United States | G0895     | 1              | 1.00 | 1.00 | 0.99 | 0.99 | 0.98 | 0.97 | 0.97 | 0.96 | 0.95 | 0.94 | 0.92 | 0.89 | 0.87 | 0.85 | 0.83 | 0.78 | 0.73 |
| United States | G0896     | 1              | 1.00 | 0.99 | 0.96 | 0.93 | 0.91 | 0.87 | 0.84 | 0.81 | 0.78 | 0.75 | 0.71 | 0.66 | 0.62 | 0.59 | 0.57 | 0.50 | 0.46 |
| United States | G0897     | 1              | 1.00 | 0.98 | 0.94 | 0.89 | 0.83 | 0.78 | 0.73 | 0.70 | 0.67 | 0.64 | 0.58 | 0.53 | 0.50 | 0.47 | 0.44 | 0.39 | 0.35 |
| United States | G0898     | 1              | 1.00 | 1.00 | 0.99 | 0.97 | 0.96 | 0.93 | 0.90 | 0.87 | 0.84 | 0.81 | 0.76 | 0.70 | 0.65 | 0.61 | 0.57 | 0.48 | 0.42 |
| United States | G0899     | 1              | 1.00 | 1.00 | 0.99 | 0.99 | 0.98 | 0.97 | 0.97 | 0.96 | 0.95 | 0.94 | 0.92 | 0.89 | 0.87 | 0.85 | 0.83 | 0.78 | 0.74 |
| United States | G0900     | 1              | 0.98 | 0.96 | 0.94 | 0.93 | 0.91 | 0.90 | 0.88 | 0.86 | 0.85 | 0.83 | 0.80 | 0.77 | 0.75 | 0.71 | 0.69 | 0.62 | 0.56 |
| United States | G0901     | 1              | 0.99 | 0.96 | 0.93 | 0.90 | 0.86 | 0.83 | 0.80 | 0.78 | 0.76 | 0.73 | 0.68 | 0.65 | 0.61 | 0.59 | 0.56 | 0.51 | 0.47 |
| United States | G0902     | 1              | 1.00 | 1.00 | 0.99 | 0.99 | 0.98 | 0.96 | 0.94 | 0.91 | 0.88 | 0.85 | 0.77 | 0.70 | 0.64 | 0.60 | 0.55 | 0.48 | 0.43 |
| United States | G0903     | 1              | 1.00 | 0.99 | 0.97 | 0.94 | 0.92 | 0.89 | 0.87 | 0.86 | 0.84 | 0.82 | 0.79 | 0.77 | 0.75 | 0.73 | 0.71 | 0.68 | 0.65 |
| United States | G0904     | 1              | 0.98 | 0.96 | 0.94 | 0.93 | 0.91 | 0.89 | 0.88 | 0.86 | 0.84 | 0.83 | 0.81 | 0.79 | 0.76 | 0.75 | 0.74 | 0.70 | 0.64 |
| United States | G0905     | 1              | 0.98 | 0.95 | 0.92 | 0.90 | 0.88 | 0.86 | 0.85 | 0.83 | 0.81 | 0.79 | 0.76 | 0.73 | 0.71 | 0.67 | 0.65 | 0.58 | 0.53 |

| Country       | GloFAS ID | Station filter | LT1  | LT2  | LT3  | LT4  | LT5  | LT6  | LT7  | LT8  | LT9  | LT10 | LT12 | LT14 | LT16 | LT18 | LT20 | LT25 | L30   |
|---------------|-----------|----------------|------|------|------|------|------|------|------|------|------|------|------|------|------|------|------|------|-------|
| United States | G0906     | 1              | 0.97 | 0.92 | 0.86 | 0.81 | 0.77 | 0.72 | 0.67 | 0.63 | 0.59 | 0.56 | 0.49 | 0.43 | 0.39 | 0.35 | 0.31 | 0.23 | 0.17  |
| United States | G0907     | 1              | 0.99 | 0.97 | 0.95 | 0.93 | 0.91 | 0.89 | 0.88 | 0.87 | 0.85 | 0.84 | 0.81 | 0.79 | 0.77 | 0.75 | 0.73 | 0.69 | 0.66  |
| United States | G0908     | 1              | 1.00 | 0.98 | 0.96 | 0.92 | 0.88 | 0.84 | 0.80 | 0.76 | 0.73 | 0.69 | 0.62 | 0.56 | 0.51 | 0.46 | 0.43 | 0.33 | 0.26  |
| United States | G0909     | 1              | 1.00 | 1.00 | 1.00 | 0.99 | 0.98 | 0.97 | 0.96 | 0.94 | 0.92 | 0.90 | 0.84 | 0.78 | 0.73 | 0.67 | 0.61 | 0.50 | 0.40  |
| United States | G0910     | 1              | 0.99 | 0.97 | 0.92 | 0.87 | 0.81 | 0.75 | 0.69 | 0.65 | 0.60 | 0.55 | 0.49 | 0.45 | 0.41 | 0.37 | 0.34 | 0.27 | 0.23  |
| United States | G0912     | 1              | 0.97 | 0.92 | 0.90 | 0.87 | 0.83 | 0.78 | 0.76 | 0.74 | 0.69 | 0.67 | 0.65 | 0.62 | 0.58 | 0.59 | 0.56 | 0.53 | 0.46  |
| United States | G0913     | 1              | 0.99 | 0.89 | 0.79 | 0.77 | 0.70 | 0.64 | 0.60 | 0.57 | 0.52 | 0.49 | 0.46 | 0.40 | 0.38 | 0.35 | 0.33 | 0.27 | 0.22  |
| United States | G0914     | 1              | 0.96 | 0.89 | 0.76 | 0.69 | 0.63 | 0.56 | 0.53 | 0.50 | 0.47 | 0.45 | 0.40 | 0.37 | 0.33 | 0.32 | 0.28 | 0.25 | 0.21  |
| United States | G0917     | 1              | 0.99 | 0.97 | 0.95 | 0.92 | 0.89 | 0.87 | 0.84 | 0.80 | 0.76 | 0.73 | 0.67 | 0.64 | 0.58 | 0.55 | 0.51 | 0.43 | 0.36  |
| United States | G0918     | 1              | 1.00 | 0.99 | 0.98 | 0.96 | 0.94 | 0.90 | 0.85 | 0.80 | 0.76 | 0.73 | 0.67 | 0.60 | 0.55 | 0.50 | 0.46 | 0.36 | 0.28  |
| United States | G0919     | 1              | 1.00 | 0.99 | 0.99 | 0.98 | 0.97 | 0.95 | 0.94 | 0.92 | 0.91 | 0.91 | 0.89 | 0.87 | 0.86 | 0.85 | 0.84 | 0.81 | 0.77  |
| United States | G0920     | 1              | 1.00 | 0.99 | 0.98 | 0.97 | 0.96 | 0.95 | 0.93 | 0.91 | 0.90 | 0.90 | 0.88 | 0.86 | 0.84 | 0.83 | 0.82 | 0.79 | 0.76  |
| United States | G0926     | 1              | 1.00 | 1.00 | 1.00 | 1.00 | 0.99 | 0.99 | 0.98 | 0.97 | 0.96 | 0.95 | 0.94 | 0.92 | 0.91 | 0.90 | 0.89 | 0.87 | 0.86  |
| United States | G1731     | 1              | 1.00 | 1.00 | 1.00 | 0.99 | 0.99 | 0.98 | 0.97 | 0.96 | 0.95 | 0.93 | 0.88 | 0.81 | 0.73 | 0.66 | 0.59 | 0.45 | 0.34  |
| United States | G1732     | 1              | 1.00 | 0.99 | 0.98 | 0.95 | 0.92 | 0.89 | 0.85 | 0.81 | 0.77 | 0.73 | 0.66 | 0.60 | 0.54 | 0.50 | 0.46 | 0.40 | 0.36  |
| United States | G1733     | 1              | 0.98 | 0.94 | 0.90 | 0.86 | 0.84 | 0.81 | 0.79 | 0.77 | 0.75 | 0.72 | 0.67 | 0.64 | 0.62 | 0.59 | 0.56 | 0.50 | 0.48  |
| United States | G1734     | 1              | 0.99 | 0.97 | 0.94 | 0.88 | 0.82 | 0.75 | 0.68 | 0.62 | 0.55 | 0.50 | 0.42 | 0.35 | 0.31 | 0.27 | 0.23 | 0.19 | 0.15  |
| United States | G1809     | 1              | 0.99 | 0.97 | 0.94 | 0.90 | 0.84 | 0.79 | 0.74 | 0.69 | 0.64 | 0.60 | 0.52 | 0.47 | 0.43 | 0.39 | 0.36 | 0.30 | 0.26  |
| United States | G1810     | 1              | 1.00 | 0.98 | 0.96 | 0.92 | 0.89 | 0.85 | 0.81 | 0.76 | 0.72 | 0.68 | 0.62 | 0.55 | 0.50 | 0.46 | 0.42 | 0.34 | 0.28  |
| United States | G1811     | 1              | 1.00 | 1.00 | 0.98 | 0.95 | 0.90 | 0.86 | 0.82 | 0.79 | 0.75 | 0.72 | 0.65 | 0.61 | 0.56 | 0.52 | 0.49 | 0.41 | 0.35  |
| United States | G1812     | 1              | 0.96 | 0.88 | 0.82 | 0.77 | 0.71 | 0.66 | 0.61 | 0.56 | 0.53 | 0.51 | 0.45 | 0.43 | 0.39 | 0.36 | 0.33 | 0.27 | 0.24  |
| United States | G1813     | 1              | 0.94 | 0.85 | 0.80 | 0.74 | 0.69 | 0.64 | 0.59 | 0.55 | 0.53 | 0.50 | 0.46 | 0.43 | 0.40 | 0.37 | 0.36 | 0.29 | 0.27  |
| United States | G1814     | 1              | 0.91 | 0.83 | 0.78 | 0.70 | 0.66 | 0.62 | 0.54 | 0.52 | 0.52 | 0.50 | 0.46 | 0.43 | 0.41 | 0.36 | 0.37 | 0.30 | 0.30  |
| United States | G1815     | 1              | 0.98 | 0.94 | 0.88 | 0.84 | 0.79 | 0.74 | 0.72 | 0.68 | 0.65 | 0.63 | 0.59 | 0.57 | 0.55 | 0.52 | 0.49 | 0.44 | 0.41  |
| United States | G1816     | 1              | 0.97 | 0.92 | 0.90 | 0.87 | 0.82 | 0.78 | 0.76 | 0.74 | 0.69 | 0.67 | 0.65 | 0.63 | 0.59 | 0.59 | 0.56 | 0.53 | 0.47  |
| United States | G1817     | 1              | 1.00 | 0.99 | 0.99 | 0.97 | 0.96 | 0.94 | 0.92 | 0.90 | 0.88 | 0.86 | 0.82 | 0.79 | 0.77 | 0.74 | 0.72 | 0.65 | 0.59  |
| United States | G1818     | 1              | 1.00 | 0.99 | 0.98 | 0.97 | 0.96 | 0.94 | 0.93 | 0.91 | 0.90 | 0.88 | 0.85 | 0.81 | 0.79 | 0.76 | 0.73 | 0.67 | 0.61  |
| United States | G1819     | 1              | 0.99 | 0.97 | 0.94 | 0.92 | 0.90 | 0.87 | 0.85 | 0.83 | 0.81 | 0.78 | 0.74 | 0.69 | 0.64 | 0.60 | 0.57 | 0.48 | 0.41  |
| United States | G1820     | 1              | 1.00 | 1.00 | 0.99 | 0.99 | 0.98 | 0.97 | 0.95 | 0.92 | 0.88 | 0.83 | 0.73 | 0.64 | 0.57 | 0.51 | 0.45 | 0.33 | 0.25  |
| United States | G1821     | 1              | 1.00 | 1.00 | 0.99 | 0.97 | 0.93 | 0.89 | 0.83 | 0.77 | 0.72 | 0.68 | 0.60 | 0.54 | 0.48 | 0.42 | 0.38 | 0.28 | 0.22  |
| United States | G1822     | 1              | 1.00 | 1.00 | 0.98 | 0.96 | 0.91 | 0.86 | 0.80 | 0.75 | 0.70 | 0.65 | 0.58 | 0.52 | 0.46 | 0.41 | 0.36 | 0.27 | 0.21  |
| United States | G1823     | 1              | 0.99 | 0.96 | 0.88 | 0.77 | 0.66 | 0.56 | 0.48 | 0.41 | 0.35 | 0.31 | 0.25 | 0.19 | 0.15 | 0.11 | 0.06 | 0.00 | -0.04 |
| United States | G1824     | 1              | 1.00 | 0.98 | 0.94 | 0.88 | 0.81 | 0.72 | 0.63 | 0.54 | 0.46 | 0.40 | 0.28 | 0.21 | 0.14 | 0.09 | 0.05 | 0.02 | -0.01 |
| United States | G1825     | 1              | 0.99 | 0.95 | 0.85 | 0.73 | 0.62 | 0.53 | 0.47 | 0.41 | 0.38 | 0.36 | 0.32 | 0.30 | 0.28 | 0.27 | 0.26 | 0.25 | 0.23  |
| United States | G1826     | 1              | 1.00 | 1.00 | 0.99 | 0.97 | 0.94 | 0.91 | 0.88 | 0.84 | 0.80 | 0.76 | 0.69 | 0.62 | 0.56 | 0.51 | 0.47 | 0.40 | 0.36  |
| United States | G1859     | 1              | 0.95 | 0.81 | 0.70 | 0.62 | 0.57 | 0.55 | 0.54 | 0.51 | 0.50 | 0.51 | 0.49 | 0.49 | 0.47 | 0.48 | 0.48 | 0.47 | 0.46  |
| United States | G2109     | 1              | 0.99 | 0.97 | 0.94 | 0.90 | 0.87 | 0.84 | 0.81 | 0.78 | 0.75 | 0.73 | 0.67 | 0.62 | 0.59 | 0.58 | 0.55 | 0.54 | 0.52  |
| United States | G2110     | 1              | 0.94 | 0.80 | 0.70 | 0.62 | 0.57 | 0.53 | 0.52 | 0.51 | 0.49 | 0.48 | 0.44 | 0.42 | 0.41 | 0.42 | 0.42 | 0.42 | 0.43  |
| United States | G2134     | 1              | 1.00 | 0.99 | 0.98 | 0.96 | 0.94 | 0.92 | 0.88 | 0.85 | 0.81 | 0.78 | 0.71 | 0.66 | 0.63 | 0.60 | 0.57 | 0.54 | 0.51  |

| Country       | GloFAS ID | Station filter | LT1  | LT2  | LT3  | LT4  | LT5  | LT6   | LT7   | LT8   | LT9   | LT10  | LT12  | LT14  | LT16  | LT18  | LT20  | LT25  | L30   |
|---------------|-----------|----------------|------|------|------|------|------|-------|-------|-------|-------|-------|-------|-------|-------|-------|-------|-------|-------|
| United States | G2135     | 1              | 0.97 | 0.90 | 0.83 | 0.77 | 0.71 | 0.67  | 0.66  | 0.65  | 0.62  | 0.60  | 0.57  | 0.54  | 0.53  | 0.52  | 0.47  | 0.47  | 0.46  |
| United States | G2136     | 1              | 0.97 | 0.88 | 0.81 | 0.75 | 0.70 | 0.67  | 0.67  | 0.66  | 0.64  | 0.64  | 0.60  | 0.57  | 0.55  | 0.54  | 0.51  | 0.50  | 0.49  |
| United States | G2137     | 1              | 0.92 | 0.77 | 0.67 | 0.60 | 0.55 | 0.54  | 0.53  | 0.51  | 0.50  | 0.50  | 0.48  | 0.47  | 0.47  | 0.48  | 0.46  | 0.45  | 0.44  |
| United States | G2138     | 1              | 0.89 | 0.74 | 0.65 | 0.59 | 0.56 | 0.56  | 0.54  | 0.52  | 0.52  | 0.52  | 0.50  | 0.50  | 0.49  | 0.48  | 0.49  | 0.47  | 0.46  |
| United States | G2155     | 1              | 0.99 | 0.96 | 0.91 | 0.84 | 0.77 | 0.71  | 0.65  | 0.61  | 0.59  | 0.58  | 0.55  | 0.51  | 0.49  | 0.47  | 0.47  | 0.45  | 0.43  |
| United States | G2156     | 1              | 1.00 | 0.99 | 0.97 | 0.94 | 0.90 | 0.85  | 0.81  | 0.76  | 0.72  | 0.69  | 0.65  | 0.61  | 0.58  | 0.55  | 0.53  | 0.52  | 0.48  |
| United States | G2157     | 1              | 0.99 | 0.93 | 0.86 | 0.79 | 0.74 | 0.70  | 0.66  | 0.64  | 0.62  | 0.59  | 0.55  | 0.50  | 0.45  | 0.43  | 0.39  | 0.37  | 0.36  |
| United States | G2161     | 1              | 0.95 | 0.84 | 0.79 | 0.73 | 0.69 | 0.68  | 0.68  | 0.66  | 0.62  | 0.62  | 0.59  | 0.56  | 0.53  | 0.53  | 0.47  | 0.43  | 0.40  |
| United States | G2260     | 1              | 0.98 | 0.89 | 0.78 | 0.67 | 0.58 | 0.55  | 0.53  | 0.50  | 0.47  | 0.46  | 0.43  | 0.37  | 0.32  | 0.27  | 0.22  | 0.19  | 0.16  |
| United States | G2266     | 1              | 0.99 | 0.93 | 0.81 | 0.69 | 0.62 | 0.58  | 0.55  | 0.51  | 0.47  | 0.45  | 0.38  | 0.32  | 0.27  | 0.23  | 0.20  | 0.16  | 0.15  |
| United States | G2277     | 1              | 0.99 | 0.89 | 0.76 | 0.67 | 0.59 | 0.55  | 0.54  | 0.51  | 0.49  | 0.46  | 0.41  | 0.38  | 0.32  | 0.26  | 0.22  | 0.18  | 0.14  |
| United States | G2278     | 1              | 1.00 | 0.99 | 0.98 | 0.97 | 0.96 | 0.95  | 0.92  | 0.90  | 0.88  | 0.86  | 0.82  | 0.78  | 0.75  | 0.72  | 0.70  | 0.65  | 0.62  |
| United States | G2287     | 1              | 0.93 | 0.82 | 0.77 | 0.71 | 0.66 | 0.64  | 0.62  | 0.58  | 0.56  | 0.55  | 0.51  | 0.50  | 0.46  | 0.42  | 0.40  | 0.37  | 0.35  |
| United States | G2288     | 1              | 0.94 | 0.82 | 0.75 | 0.70 | 0.66 | 0.64  | 0.63  | 0.60  | 0.58  | 0.57  | 0.54  | 0.52  | 0.49  | 0.45  | 0.44  | 0.42  | 0.40  |
| United States | G2299     | 1              | 1.00 | 0.98 | 0.90 | 0.81 | 0.72 | 0.64  | 0.61  | 0.59  | 0.56  | 0.53  | 0.48  | 0.44  | 0.39  | 0.31  | 0.26  | 0.19  | 0.15  |
| United States | G2307     | 1              | 0.98 | 0.90 | 0.82 | 0.77 | 0.72 | 0.68  | 0.65  | 0.61  | 0.57  | 0.55  | 0.51  | 0.48  | 0.46  | 0.40  | 0.36  | 0.32  | 0.28  |
| United States | G2308     | 1              | 0.96 | 0.85 | 0.78 | 0.74 | 0.69 | 0.67  | 0.65  | 0.62  | 0.60  | 0.59  | 0.55  | 0.53  | 0.49  | 0.45  | 0.44  | 0.41  | 0.39  |
| United States | G2309     | 1              | 0.99 | 0.95 | 0.85 | 0.72 | 0.60 | 0.51  | 0.46  | 0.43  | 0.39  | 0.37  | 0.31  | 0.25  | 0.20  | 0.19  | 0.16  | 0.13  | 0.16  |
| United States | G2316     | 1              | 0.99 | 0.97 | 0.93 | 0.85 | 0.78 | 0.72  | 0.67  | 0.62  | 0.59  | 0.57  | 0.51  | 0.46  | 0.41  | 0.41  | 0.40  | 0.35  | 0.34  |
| United States | G2317     | 1              | 0.99 | 0.92 | 0.84 | 0.77 | 0.73 | 0.69  | 0.67  | 0.64  | 0.61  | 0.59  | 0.55  | 0.52  | 0.48  | 0.44  | 0.43  | 0.38  | 0.36  |
| United States | G2318     | 1              | 0.98 | 0.90 | 0.83 | 0.77 | 0.73 | 0.70  | 0.69  | 0.65  | 0.63  | 0.61  | 0.57  | 0.55  | 0.51  | 0.47  | 0.45  | 0.42  | 0.40  |
| United States | G2319     | 1              | 0.96 | 0.87 | 0.78 | 0.71 | 0.66 | 0.62  | 0.60  | 0.58  | 0.57  | 0.56  | 0.52  | 0.50  | 0.47  | 0.47  | 0.43  | 0.37  | 0.36  |
| United States | G2320     | 1              | 1.00 | 0.99 | 0.93 | 0.85 | 0.76 | 0.67  | 0.62  | 0.60  | 0.58  | 0.54  | 0.49  | 0.44  | 0.38  | 0.32  | 0.25  | 0.17  | 0.14  |
| United States | G2321     | 1              | 0.97 | 0.83 | 0.64 | 0.48 | 0.39 | 0.33  | 0.27  | 0.23  | 0.23  | 0.22  | 0.19  | 0.12  | 0.13  | 0.16  | 0.18  | 0.13  | 0.12  |
| United States | G2332     | 1              | 0.98 | 0.87 | 0.66 | 0.40 | 0.16 | -0.04 | -0.20 | -0.31 | -0.38 | -0.43 | -0.51 | -0.55 | -0.59 | -0.63 | -0.64 | -0.68 | -0.67 |
| United States | G2333     | 1              | 1.00 | 0.99 | 0.97 | 0.92 | 0.85 | 0.78  | 0.71  | 0.67  | 0.64  | 0.61  | 0.54  | 0.50  | 0.44  | 0.38  | 0.31  | 0.20  | 0.16  |
| United States | G2334     | 1              | 1.00 | 0.99 | 0.99 | 0.97 | 0.94 | 0.89  | 0.81  | 0.73  | 0.69  | 0.65  | 0.58  | 0.52  | 0.47  | 0.41  | 0.37  | 0.25  | 0.19  |
| United States | G2342     | 1              | 0.97 | 0.85 | 0.68 | 0.54 | 0.43 | 0.34  | 0.26  | 0.23  | 0.23  | 0.21  | 0.17  | 0.12  | 0.11  | 0.05  | 0.07  | 0.11  | 0.13  |
| United States | G2355     | 1              | 1.00 | 1.00 | 0.99 | 0.97 | 0.93 | 0.88  | 0.81  | 0.74  | 0.70  | 0.67  | 0.62  | 0.55  | 0.51  | 0.45  | 0.39  | 0.24  | 0.19  |
| United States | G2356     | 1              | 1.00 | 1.00 | 1.00 | 1.00 | 0.99 | 0.99  | 0.98  | 0.97  | 0.96  | 0.94  | 0.90  | 0.86  | 0.81  | 0.78  | 0.74  | 0.66  | 0.60  |
| United States | G2357     | 1              | 1.00 | 1.00 | 0.99 | 0.97 | 0.94 | 0.89  | 0.81  | 0.73  | 0.63  | 0.54  | 0.43  | 0.38  | 0.31  | 0.26  | 0.25  | 0.20  | 0.16  |
| United States | G2358     | 1              | 0.99 | 0.96 | 0.86 | 0.71 | 0.60 | 0.48  | 0.34  | 0.24  | 0.20  | 0.17  | 0.10  | 0.04  | -0.04 | -0.07 | -0.09 | -0.06 | -0.05 |
| United States | G2363     | 1              | 1.00 | 1.00 | 1.00 | 1.00 | 1.00 | 0.99  | 0.99  | 0.98  | 0.97  | 0.96  | 0.93  | 0.89  | 0.81  | 0.67  | 0.47  | 0.12  | -0.06 |
| United States | G2364     | 1              | 1.00 | 1.00 | 1.00 | 0.99 | 0.98 | 0.97  | 0.96  | 0.95  | 0.93  | 0.90  | 0.82  | 0.66  | 0.42  | 0.19  | 0.04  | -0.19 | -0.32 |
| United States | G2365     | 1              | 1.00 | 1.00 | 0.99 | 0.98 | 0.98 | 0.97  | 0.95  | 0.94  | 0.91  | 0.88  | 0.78  | 0.58  | 0.32  | 0.12  | -0.02 | -0.22 | -0.34 |
| United States | G2366     | 1              | 1.00 | 1.00 | 0.99 | 0.99 | 0.98 | 0.97  | 0.95  | 0.93  | 0.90  | 0.85  | 0.71  | 0.47  | 0.22  | 0.05  | -0.06 | -0.24 | -0.35 |
| United States | G2367     | 1              | 1.00 | 1.00 | 1.00 | 0.99 | 0.99 | 0.97  | 0.96  | 0.93  | 0.90  | 0.85  | 0.69  | 0.43  | 0.20  | 0.04  | -0.07 | -0.24 | -0.35 |
| United States | G2374     | 1              | 0.98 | 0.90 | 0.74 | 0.59 | 0.45 | 0.34  | 0.27  | 0.22  | 0.19  | 0.15  | 0.11  | 0.06  | 0.04  | -0.01 | -0.04 | -0.09 | -0.09 |
| United States | G2375     | 1              | 0.99 | 0.89 | 0.69 | 0.50 | 0.35 | 0.23  | 0.12  | 0.01  | -0.08 | -0.14 | -0.31 | -0.42 | -0.45 | -0.45 | -0.46 | -0.28 | -0.20 |

| Country       | GloFAS ID | Station filter | LT1  | LT2  | LT3  | LT4  | LT5  | LT6  | LT7   | LT8   | LT9   | LT10  | LT12  | LT14  | LT16  | LT18  | LT20  | LT25  | L30   |
|---------------|-----------|----------------|------|------|------|------|------|------|-------|-------|-------|-------|-------|-------|-------|-------|-------|-------|-------|
| United States | G2385     | 1              | 1.00 | 0.99 | 0.95 | 0.89 | 0.84 | 0.78 | 0.73  | 0.70  | 0.68  | 0.64  | 0.59  | 0.53  | 0.48  | 0.43  | 0.38  | 0.33  | 0.29  |
| United States | G2399     | 1              | 0.98 | 0.93 | 0.83 | 0.72 | 0.60 | 0.47 | 0.38  | 0.32  | 0.27  | 0.22  | 0.18  | 0.13  | 0.11  | 0.09  | 0.10  | 0.09  | 0.11  |
| United States | G2400     | 1              | 1.00 | 0.99 | 0.97 | 0.92 | 0.86 | 0.81 | 0.75  | 0.71  | 0.68  | 0.65  | 0.59  | 0.53  | 0.48  | 0.43  | 0.38  | 0.30  | 0.27  |
| United States | G2445     | 1              | 1.00 | 1.00 | 0.99 | 0.98 | 0.96 | 0.93 | 0.88  | 0.81  | 0.73  | 0.61  | 0.34  | 0.13  | -0.01 | -0.10 | -0.17 | -0.29 | -0.39 |
| United States | G2468     | 1              | 1.00 | 1.00 | 0.99 | 0.99 | 0.98 | 0.98 | 0.97  | 0.96  | 0.95  | 0.93  | 0.90  | 0.88  | 0.85  | 0.80  | 0.71  | 0.31  | 0.05  |
| United States | G2482     | 1              | 1.00 | 0.99 | 0.95 | 0.85 | 0.74 | 0.64 | 0.54  | 0.45  | 0.39  | 0.34  | 0.26  | 0.20  | 0.15  | 0.12  | 0.12  | 0.01  | -0.02 |
| United States | G2496     | 1              | 1.00 | 0.99 | 0.98 | 0.96 | 0.92 | 0.87 | 0.82  | 0.76  | 0.71  | 0.67  | 0.60  | 0.54  | 0.48  | 0.42  | 0.37  | 0.27  | 0.23  |
| United States | G2497     | 1              | 1.00 | 1.00 | 0.99 | 0.99 | 0.97 | 0.94 | 0.91  | 0.88  | 0.85  | 0.82  | 0.78  | 0.74  | 0.71  | 0.66  | 0.61  | 0.34  | 0.06  |
| United States | G2498     | 1              | 0.94 | 0.75 | 0.57 | 0.42 | 0.30 | 0.21 | 0.11  | 0.06  | 0.02  | -0.03 | -0.16 | -0.24 | -0.28 | -0.40 | -0.38 | -0.39 | -0.33 |
| United States | G2503     | 1              | 1.00 | 1.00 | 0.99 | 0.98 | 0.97 | 0.96 | 0.94  | 0.92  | 0.89  | 0.86  | 0.79  | 0.74  | 0.69  | 0.66  | 0.62  | 0.45  | 0.14  |
| United States | G2504     | 1              | 0.98 | 0.91 | 0.83 | 0.75 | 0.66 | 0.56 | 0.47  | 0.39  | 0.32  | 0.25  | 0.15  | 0.09  | 0.07  | 0.06  | 0.05  | -0.01 | 0.00  |
| United States | G2505     | 1              | 1.00 | 0.97 | 0.87 | 0.74 | 0.58 | 0.45 | 0.34  | 0.25  | 0.19  | 0.14  | 0.07  | 0.02  | -0.01 | -0.04 | -0.08 | -0.15 | -0.15 |
| United States | G2506     | 1              | 0.99 | 0.96 | 0.90 | 0.85 | 0.79 | 0.74 | 0.69  | 0.64  | 0.60  | 0.56  | 0.49  | 0.42  | 0.37  | 0.30  | 0.25  | 0.16  | 0.14  |
| United States | G2512     | 1              | 1.00 | 1.00 | 0.99 | 0.98 | 0.96 | 0.94 | 0.91  | 0.87  | 0.84  | 0.81  | 0.76  | 0.71  | 0.68  | 0.64  | 0.59  | 0.36  | 0.06  |
| United States | G2513     | 1              | 1.00 | 0.98 | 0.93 | 0.87 | 0.81 | 0.76 | 0.70  | 0.65  | 0.60  | 0.56  | 0.48  | 0.42  | 0.36  | 0.29  | 0.24  | 0.14  | 0.11  |
| United States | G2518     | 1              | 0.98 | 0.83 | 0.56 | 0.32 | 0.15 | 0.02 | -0.07 | -0.11 | -0.14 | -0.16 | -0.16 | -0.17 | -0.16 | -0.09 | -0.28 | -0.14 | -0.13 |
| United States | G2524     | 1              | 0.96 | 0.82 | 0.67 | 0.55 | 0.46 | 0.40 | 0.34  | 0.29  | 0.26  | 0.24  | 0.20  | 0.16  | 0.12  | 0.05  | 0.02  | 0.04  | 0.05  |
| United States | G2531     | 1              | 0.99 | 0.98 | 0.94 | 0.88 | 0.82 | 0.76 | 0.70  | 0.65  | 0.61  | 0.57  | 0.50  | 0.44  | 0.40  | 0.38  | 0.36  | 0.37  | 0.38  |
| United States | G2541     | 1              | 0.98 | 0.87 | 0.69 | 0.53 | 0.42 | 0.33 | 0.26  | 0.22  | 0.18  | 0.15  | 0.10  | 0.06  | 0.04  | 0.01  | -0.02 | -0.04 | -0.06 |
| United States | G2542     | 1              | 0.97 | 0.86 | 0.79 | 0.75 | 0.70 | 0.65 | 0.60  | 0.56  | 0.51  | 0.47  | 0.41  | 0.31  | 0.22  | 0.18  | 0.13  | 0.11  | 0.17  |
| United States | G2566     | 1              | 0.92 | 0.70 | 0.51 | 0.38 | 0.31 | 0.26 | 0.22  | 0.19  | 0.18  | 0.18  | 0.16  | 0.15  | 0.13  | 0.10  | 0.07  | 0.07  | 0.06  |
| United States | G2668     | 1              | 1.00 | 0.98 | 0.93 | 0.86 | 0.78 | 0.70 | 0.64  | 0.60  | 0.56  | 0.53  | 0.50  | 0.48  | 0.45  | 0.44  | 0.43  | 0.41  | 0.38  |
| United States | G2669     | 1              | 1.00 | 0.99 | 0.94 | 0.80 | 0.59 | 0.35 | 0.14  | -0.03 | -0.15 | -0.25 | -0.38 | -0.47 | -0.52 | -0.57 | -0.56 | -0.38 | -0.31 |
| United States | G2676     | 1              | 0.98 | 0.90 | 0.75 | 0.62 | 0.51 | 0.44 | 0.39  | 0.36  | 0.34  | 0.34  | 0.33  | 0.32  | 0.31  | 0.29  | 0.29  | 0.27  | 0.24  |
| United States | G2677     | 1              | 1.00 | 0.95 | 0.80 | 0.61 | 0.45 | 0.33 | 0.26  | 0.20  | 0.14  | 0.11  | 0.05  | 0.02  | -0.02 | 0.04  | 0.13  | 0.07  | 0.05  |
| United States | G2682     | 1              | 1.00 | 0.95 | 0.79 | 0.63 | 0.50 | 0.40 | 0.34  | 0.30  | 0.27  | 0.24  | 0.22  | 0.20  | 0.19  | 0.16  | 0.09  | 0.01  | 0.03  |
| United States | G2683     | 1              | 0.97 | 0.75 | 0.52 | 0.37 | 0.28 | 0.21 | 0.18  | 0.15  | 0.13  | 0.12  | 0.12  | 0.12  | 0.11  | 0.08  | -0.02 | -0.03 | 0.02  |
| United States | G2691     | 1              | 1.00 | 0.96 | 0.87 | 0.75 | 0.64 | 0.56 | 0.51  | 0.46  | 0.42  | 0.39  | 0.35  | 0.31  | 0.28  | 0.21  | 0.14  | 0.11  | 0.10  |
| United States | G2692     | 1              | 0.99 | 0.90 | 0.76 | 0.62 | 0.53 | 0.48 | 0.44  | 0.40  | 0.36  | 0.34  | 0.30  | 0.26  | 0.21  | 0.05  | 0.00  | 0.04  | 0.05  |
| United States | G2722     | 1              | 0.95 | 0.68 | 0.40 | 0.28 | 0.24 | 0.25 | 0.25  | 0.25  | 0.26  | 0.26  | 0.26  | 0.23  | 0.20  | 0.08  | -0.01 | -0.09 | -0.12 |
| United States | G2733     | 1              | 0.92 | 0.71 | 0.61 | 0.56 | 0.52 | 0.48 | 0.46  | 0.42  | 0.38  | 0.35  | 0.27  | 0.23  | 0.17  | 0.02  | -0.07 | -0.14 | -0.21 |
| United States | G2734     | 1              | 0.96 | 0.78 | 0.58 | 0.45 | 0.37 | 0.32 | 0.28  | 0.25  | 0.22  | 0.21  | 0.21  | 0.19  | 0.17  | 0.18  | 0.17  | 0.14  | 0.11  |
| United States | G2744     | 1              | 1.00 | 1.00 | 0.99 | 0.98 | 0.97 | 0.96 | 0.95  | 0.94  | 0.92  | 0.91  | 0.86  | 0.80  | 0.74  | 0.69  | 0.65  | 0.53  | 0.34  |
| United States | G2745     | 1              | 1.00 | 0.98 | 0.95 | 0.90 | 0.85 | 0.79 | 0.72  | 0.65  | 0.60  | 0.56  | 0.50  | 0.46  | 0.44  | 0.42  | 0.40  | 0.38  | 0.35  |
| United States | G2756     | 1              | 0.98 | 0.85 | 0.65 | 0.51 | 0.43 | 0.39 | 0.35  | 0.32  | 0.30  | 0.29  | 0.27  | 0.25  | 0.23  | 0.19  | 0.15  | 0.10  | 0.08  |
| United States | G2760     | 1              | 0.99 | 0.91 | 0.76 | 0.58 | 0.39 | 0.22 | 0.05  | -0.10 | -0.23 | -0.34 | -0.53 | -0.69 | -0.85 | -1.06 | -1.35 | -1.90 | -2.22 |
| United States | G2773     | 1              | 1.00 | 1.00 | 1.00 | 0.99 | 0.98 | 0.97 | 0.96  | 0.95  | 0.93  | 0.92  | 0.89  | 0.85  | 0.81  | 0.76  | 0.71  | 0.60  | 0.47  |
| United States | G2793     | 1              | 1.00 | 0.99 | 0.97 | 0.93 | 0.86 | 0.78 | 0.70  | 0.61  | 0.54  | 0.49  | 0.42  | 0.37  | 0.33  | 0.29  | 0.20  | 0.04  | 0.03  |
| United States | G2794     | 1              | 0.99 | 0.92 | 0.80 | 0.70 | 0.62 | 0.56 | 0.52  | 0.49  | 0.46  | 0.43  | 0.39  | 0.34  | 0.31  | 0.23  | 0.11  | 0.02  | 0.01  |

| Country       | GloFAS ID | Station filter | LT1  | LT2  | LT3  | LT4   | LT5   | LT6   | LT7   | LT8   | LT9   | LT10  | LT12  | LT14  | LT16  | LT18  | LT20  | LT25  | L30   |
|---------------|-----------|----------------|------|------|------|-------|-------|-------|-------|-------|-------|-------|-------|-------|-------|-------|-------|-------|-------|
| United States | G2802     | 1              | 1.00 | 0.98 | 0.93 | 0.84  | 0.73  | 0.63  | 0.54  | 0.47  | 0.41  | 0.36  | 0.29  | 0.24  | 0.19  | 0.15  | 0.08  | -0.05 | -0.09 |
| United States | G2803     | 1              | 1.00 | 0.96 | 0.85 | 0.66  | 0.50  | 0.39  | 0.31  | 0.26  | 0.22  | 0.19  | 0.13  | 0.07  | 0.03  | -0.05 | -0.10 | -0.17 | -0.23 |
| United States | G2813     | 1              | 1.00 | 0.96 | 0.86 | 0.73  | 0.62  | 0.54  | 0.49  | 0.46  | 0.43  | 0.42  | 0.40  | 0.38  | 0.37  | 0.34  | 0.31  | 0.29  | 0.27  |
| United States | G2814     | 1              | 1.00 | 0.96 | 0.79 | 0.52  | 0.29  | 0.15  | 0.06  | 0.00  | -0.05 | -0.09 | -0.17 | -0.23 | -0.29 | -0.39 | -0.40 | -0.45 | -0.55 |
| United States | G2943     | 1              | 1.00 | 0.99 | 0.96 | 0.90  | 0.82  | 0.72  | 0.60  | 0.50  | 0.41  | 0.34  | 0.22  | 0.12  | 0.04  | -0.02 | -0.08 | -0.17 | -0.26 |
| United States | G2951     | 1              | 1.00 | 0.98 | 0.95 | 0.90  | 0.85  | 0.80  | 0.76  | 0.73  | 0.70  | 0.67  | 0.62  | 0.59  | 0.56  | 0.53  | 0.50  | 0.45  | 0.41  |
| United States | G3558     | 1              | 0.93 | 0.87 | 0.81 | 0.77  | 0.74  | 0.70  | 0.65  | 0.62  | 0.60  | 0.58  | 0.55  | 0.53  | 0.52  | 0.50  | 0.50  | 0.49  | 0.47  |
| United States | G3647     | 1              | 0.97 | 0.87 | 0.77 | 0.68  | 0.61  | 0.54  | 0.50  | 0.46  | 0.43  | 0.39  | 0.31  | 0.29  | 0.27  | 0.24  | 0.26  | 0.24  | 0.26  |
| United States | G3654     | 1              | 0.99 | 0.98 | 0.96 | 0.94  | 0.90  | 0.86  | 0.79  | 0.70  | 0.58  | 0.46  | 0.24  | 0.08  | -0.03 | -0.12 | -0.21 | -0.37 | -0.42 |
| United States | G3655     | 1              | 0.98 | 0.95 | 0.94 | 0.93  | 0.92  | 0.91  | 0.91  | 0.91  | 0.88  | 0.86  | 0.84  | 0.83  | 0.80  | 0.77  | 0.75  | 0.67  | 0.58  |
| United States | G3656     | 1              | 1.00 | 0.98 | 0.96 | 0.92  | 0.90  | 0.88  | 0.85  | 0.83  | 0.82  | 0.80  | 0.77  | 0.76  | 0.75  | 0.73  | 0.73  | 0.70  | 0.69  |
| United States | G3664     | 1              | 1.00 | 1.00 | 0.99 | 0.99  | 0.98  | 0.98  | 0.97  | 0.96  | 0.95  | 0.93  | 0.90  | 0.87  | 0.83  | 0.78  | 0.74  | 0.63  | 0.53  |
| United States | G3665     | 1              | 0.99 | 0.98 | 0.96 | 0.93  | 0.91  | 0.89  | 0.86  | 0.85  | 0.84  | 0.82  | 0.80  | 0.79  | 0.78  | 0.76  | 0.76  | 0.74  | 0.72  |
| United States | G3671     | 1              | 1.00 | 0.99 | 0.98 | 0.96  | 0.91  | 0.83  | 0.72  | 0.59  | 0.44  | 0.30  | 0.06  | -0.11 | -0.22 | -0.28 | -0.31 | -0.32 | -0.26 |
| United States | G3672     | 1              | 1.00 | 0.98 | 0.96 | 0.92  | 0.89  | 0.87  | 0.84  | 0.82  | 0.80  | 0.79  | 0.75  | 0.74  | 0.72  | 0.71  | 0.70  | 0.68  | 0.66  |
| United States | G3673     | 1              | 1.00 | 1.00 | 0.99 | 0.99  | 0.99  | 0.98  | 0.96  | 0.94  | 0.91  | 0.86  | 0.76  | 0.64  | 0.50  | 0.38  | 0.27  | 0.07  | 0.00  |
| United States | G3677     | 1              | 0.99 | 0.98 | 0.97 | 0.95  | 0.94  | 0.92  | 0.90  | 0.88  | 0.86  | 0.83  | 0.76  | 0.69  | 0.61  | 0.52  | 0.44  | 0.29  | 0.22  |
| United States | G3688     | 1              | 0.98 | 0.91 | 0.81 | 0.71  | 0.60  | 0.51  | 0.45  | 0.40  | 0.35  | 0.32  | 0.26  | 0.23  | 0.20  | 0.23  | 0.25  | 0.31  | 0.31  |
| United States | G3689     | 1              | 0.97 | 0.87 | 0.82 | 0.79  | 0.76  | 0.67  | 0.66  | 0.65  | 0.58  | 0.56  | 0.53  | 0.44  | 0.38  | 0.37  | 0.30  | 0.22  | 0.17  |
| United States | G3693     | 1              | 0.98 | 0.96 | 0.94 | 0.92  | 0.88  | 0.85  | 0.83  | 0.79  | 0.74  | 0.70  | 0.61  | 0.54  | 0.47  | 0.42  | 0.35  | 0.27  | 0.23  |
| United States | G3702     | 1              | 1.00 | 0.99 | 0.97 | 0.94  | 0.90  | 0.86  | 0.81  | 0.76  | 0.71  | 0.66  | 0.57  | 0.50  | 0.43  | 0.37  | 0.31  | 0.17  | 0.10  |
| United States | G3730     | 1              | 0.97 | 0.70 | 0.27 | -0.13 | -0.50 | -0.86 | -1.18 | -1.47 | -1.75 | -2.00 | -2.43 | -2.81 | -3.13 | -3.33 | -3.51 | -3.75 | -3.86 |
| United States | G3731     | 1              | 1.00 | 0.99 | 0.97 | 0.94  | 0.90  | 0.85  | 0.79  | 0.72  | 0.64  | 0.55  | 0.40  | 0.26  | 0.15  | 0.07  | 0.03  | 0.00  | 0.05  |
| United States | G3732     | 1              | 1.00 | 1.00 | 0.99 | 0.99  | 0.98  | 0.97  | 0.96  | 0.94  | 0.90  | 0.86  | 0.73  | 0.58  | 0.42  | 0.28  | 0.14  | -0.11 | -0.21 |
| United States | G3736     | 1              | 1.00 | 0.97 | 0.92 | 0.86  | 0.79  | 0.73  | 0.67  | 0.63  | 0.59  | 0.55  | 0.49  | 0.44  | 0.40  | 0.36  | 0.34  | 0.33  | 0.34  |
| United States | G3744     | 1              | 1.00 | 0.99 | 0.98 | 0.96  | 0.93  | 0.91  | 0.88  | 0.86  | 0.84  | 0.82  | 0.76  | 0.70  | 0.65  | 0.59  | 0.53  | 0.40  | 0.31  |
| United States | G3745     | 1              | 1.00 | 1.00 | 1.00 | 0.98  | 0.95  | 0.89  | 0.82  | 0.73  | 0.64  | 0.56  | 0.40  | 0.27  | 0.19  | 0.12  | 0.07  | 0.07  | 0.12  |
| United States | G3746     | 1              | 0.95 | 0.87 | 0.78 | 0.70  | 0.65  | 0.59  | 0.55  | 0.51  | 0.48  | 0.45  | 0.41  | 0.38  | 0.34  | 0.31  | 0.30  | 0.26  | 0.22  |
| United States | G3747     | 1              | 0.96 | 0.90 | 0.85 | 0.80  | 0.75  | 0.71  | 0.67  | 0.65  | 0.62  | 0.60  | 0.57  | 0.54  | 0.50  | 0.49  | 0.46  | 0.43  | 0.40  |
| United States | G3750     | 1              | 1.00 | 0.99 | 0.98 | 0.96  | 0.93  | 0.91  | 0.88  | 0.86  | 0.84  | 0.81  | 0.75  | 0.69  | 0.63  | 0.57  | 0.50  | 0.37  | 0.28  |
| United States | G3757     | 1              | 1.00 | 0.99 | 0.95 | 0.90  | 0.84  | 0.78  | 0.73  | 0.69  | 0.65  | 0.62  | 0.55  | 0.49  | 0.42  | 0.37  | 0.33  | 0.29  | 0.25  |
| United States | G3764     | 1              | 0.99 | 0.98 | 0.96 | 0.94  | 0.92  | 0.89  | 0.86  | 0.83  | 0.80  | 0.76  | 0.70  | 0.64  | 0.59  | 0.56  | 0.54  | 0.51  | 0.50  |
| United States | G3772     | 1              | 1.00 | 1.00 | 0.99 | 0.99  | 0.98  | 0.96  | 0.93  | 0.90  | 0.87  | 0.84  | 0.78  | 0.72  | 0.66  | 0.61  | 0.55  | 0.43  | 0.35  |
| United States | G3781     | 1              | 0.99 | 0.98 | 0.97 | 0.97  | 0.96  | 0.95  | 0.94  | 0.93  | 0.91  | 0.90  | 0.86  | 0.81  | 0.76  | 0.71  | 0.66  | 0.53  | 0.43  |
| United States | G3786     | 1              | 1.00 | 0.97 | 0.92 | 0.85  | 0.76  | 0.69  | 0.64  | 0.58  | 0.55  | 0.52  | 0.43  | 0.36  | 0.30  | 0.28  | 0.23  | 0.17  | 0.12  |
| United States | G3806     | 1              | 1.00 | 0.99 | 0.97 | 0.93  | 0.88  | 0.82  | 0.76  | 0.71  | 0.66  | 0.62  | 0.54  | 0.47  | 0.40  | 0.35  | 0.30  | 0.22  | 0.15  |
| United States | G3826     | 1              | 1.00 | 1.00 | 1.00 | 0.99  | 0.99  | 0.99  | 0.99  | 0.99  | 0.99  | 0.98  | 0.98  | 0.97  | 0.96  | 0.94  | 0.93  | 0.89  | 0.85  |
| United States | G3827     | 1              | 0.98 | 0.96 | 0.95 | 0.93  | 0.91  | 0.89  | 0.86  | 0.82  | 0.79  | 0.75  | 0.66  | 0.58  | 0.52  | 0.47  | 0.44  | 0.39  | 0.35  |
| United States | G3830     | 1              | 1.00 | 0.99 | 0.99 | 0.98  | 0.97  | 0.96  | 0.94  | 0.92  | 0.89  | 0.86  | 0.80  | 0.74  | 0.68  | 0.62  | 0.57  | 0.46  | 0.38  |

| Country       | GloFAS ID | Station filter | LT1  | LT2  | LT3  | LT4  | LT5  | LT6  | LT7  | LT8  | LT9   | LT10  | LT12  | LT14  | LT16  | LT18  | LT20  | LT25  | L30   |
|---------------|-----------|----------------|------|------|------|------|------|------|------|------|-------|-------|-------|-------|-------|-------|-------|-------|-------|
| United States | G3835     | 1              | 1.00 | 0.99 | 0.98 | 0.96 | 0.94 | 0.92 | 0.89 | 0.87 | 0.84  | 0.82  | 0.77  | 0.71  | 0.67  | 0.62  | 0.59  | 0.49  | 0.42  |
| United States | G3836     | 1              | 0.97 | 0.92 | 0.85 | 0.81 | 0.77 | 0.73 | 0.69 | 0.66 | 0.63  | 0.60  | 0.56  | 0.53  | 0.51  | 0.48  | 0.45  | 0.40  | 0.36  |
| United States | G3838     | 1              | 0.95 | 0.84 | 0.78 | 0.72 | 0.63 | 0.55 | 0.53 | 0.50 | 0.43  | 0.42  | 0.36  | 0.32  | 0.27  | 0.27  | 0.24  | 0.23  | 0.21  |
| United States | G3839     | 1              | 0.99 | 0.96 | 0.94 | 0.91 | 0.87 | 0.83 | 0.79 | 0.75 | 0.71  | 0.68  | 0.62  | 0.58  | 0.54  | 0.50  | 0.47  | 0.41  | 0.37  |
| United States | G3844     | 1              | 1.00 | 0.98 | 0.91 | 0.75 | 0.59 | 0.45 | 0.36 | 0.29 | 0.25  | 0.22  | 0.19  | 0.18  | 0.18  | 0.17  | 0.15  | 0.11  | 0.11  |
| United States | G3847     | 1              | 1.00 | 0.99 | 0.96 | 0.91 | 0.84 | 0.75 | 0.65 | 0.55 | 0.46  | 0.38  | 0.25  | 0.16  | 0.09  | 0.04  | 0.01  | -0.04 | -0.05 |
| United States | G3857     | 1              | 0.79 | 0.61 | 0.47 | 0.37 | 0.31 | 0.26 | 0.21 | 0.18 | 0.16  | 0.13  | 0.07  | 0.03  | 0.05  | 0.06  | 0.06  | -0.02 | -0.05 |
| United States | G3882     | 1              | 1.00 | 0.99 | 0.99 | 0.98 | 0.97 | 0.95 | 0.94 | 0.93 | 0.91  | 0.89  | 0.85  | 0.81  | 0.77  | 0.73  | 0.69  | 0.60  | 0.52  |
| United States | G3884     | 1              | 0.98 | 0.94 | 0.92 | 0.89 | 0.87 | 0.85 | 0.83 | 0.81 | 0.80  | 0.78  | 0.75  | 0.73  | 0.73  | 0.75  | 0.75  | 0.73  | 0.71  |
| United States | G3885     | 1              | 0.99 | 0.97 | 0.95 | 0.93 | 0.90 | 0.86 | 0.81 | 0.77 | 0.73  | 0.69  | 0.61  | 0.55  | 0.50  | 0.46  | 0.42  | 0.36  | 0.31  |
| United States | G3887     | 1              | 1.00 | 1.00 | 1.00 | 0.99 | 0.99 | 0.99 | 0.99 | 0.99 | 0.98  | 0.98  | 0.98  | 0.98  | 0.97  | 0.97  | 0.97  | 0.96  | 0.95  |
| United States | G3890     | 1              | 1.00 | 1.00 | 0.99 | 0.98 | 0.95 | 0.92 | 0.88 | 0.84 | 0.79  | 0.74  | 0.66  | 0.59  | 0.52  | 0.45  | 0.41  | 0.30  | 0.24  |
| United States | G3891     | 1              | 1.00 | 1.00 | 0.99 | 0.99 | 0.98 | 0.97 | 0.97 | 0.96 | 0.95  | 0.94  | 0.92  | 0.90  | 0.88  | 0.86  | 0.84  | 0.81  | 0.77  |
| United States | G3892     | 1              | 0.99 | 0.98 | 0.95 | 0.92 | 0.87 | 0.84 | 0.82 | 0.79 | 0.75  | 0.71  | 0.64  | 0.60  | 0.56  | 0.52  | 0.48  | 0.42  | 0.37  |
| United States | G3893     | 1              | 0.98 | 0.95 | 0.90 | 0.85 | 0.79 | 0.72 | 0.67 | 0.61 | 0.56  | 0.50  | 0.40  | 0.33  | 0.28  | 0.25  | 0.25  | 0.23  | 0.23  |
| United States | G3897     | 1              | 0.88 | 0.70 | 0.55 | 0.46 | 0.39 | 0.32 | 0.27 | 0.24 | 0.22  | 0.19  | 0.15  | 0.09  | 0.08  | 0.11  | 0.13  | 0.12  | 0.13  |
| United States | G3899     | 1              | 1.00 | 1.00 | 1.00 | 0.99 | 0.98 | 0.98 | 0.97 | 0.96 | 0.94  | 0.93  | 0.91  | 0.88  | 0.86  | 0.83  | 0.81  | 0.76  | 0.72  |
| United States | G3900     | 1              | 1.00 | 0.99 | 0.96 | 0.94 | 0.92 | 0.90 | 0.88 | 0.85 | 0.83  | 0.81  | 0.76  | 0.72  | 0.68  | 0.63  | 0.59  | 0.52  | 0.46  |
| United States | G3902     | 1              | 1.00 | 0.99 | 0.98 | 0.96 | 0.93 | 0.90 | 0.87 | 0.83 | 0.79  | 0.75  | 0.68  | 0.61  | 0.55  | 0.49  | 0.45  | 0.35  | 0.28  |
| United States | G3907     | 1              | 1.00 | 1.00 | 0.99 | 0.97 | 0.95 | 0.92 | 0.88 | 0.84 | 0.81  | 0.77  | 0.70  | 0.63  | 0.57  | 0.50  | 0.43  | 0.31  | 0.23  |
| United States | G3908     | 1              | 0.98 | 0.97 | 0.95 | 0.93 | 0.91 | 0.88 | 0.85 | 0.81 | 0.78  | 0.74  | 0.69  | 0.63  | 0.57  | 0.53  | 0.48  | 0.40  | 0.33  |
| United States | G3910     | 1              | 1.00 | 0.99 | 0.99 | 0.98 | 0.98 | 0.97 | 0.95 | 0.93 | 0.90  | 0.87  | 0.78  | 0.68  | 0.57  | 0.45  | 0.32  | 0.06  | -0.12 |
| United States | G3911     | 1              | 1.00 | 0.98 | 0.97 | 0.95 | 0.93 | 0.91 | 0.89 | 0.87 | 0.84  | 0.82  | 0.76  | 0.71  | 0.65  | 0.61  | 0.57  | 0.47  | 0.38  |
| United States | G3927     | 1              | 0.99 | 0.96 | 0.92 | 0.89 | 0.86 | 0.84 | 0.83 | 0.81 | 0.79  | 0.76  | 0.69  | 0.61  | 0.52  | 0.44  | 0.40  | 0.33  | 0.31  |
| United States | G3928     | 1              | 0.97 | 0.90 | 0.75 | 0.62 | 0.49 | 0.40 | 0.31 | 0.24 | 0.18  | 0.13  | 0.07  | 0.02  | -0.02 | -0.17 | -0.30 | -0.35 | -0.32 |
| United States | G3929     | 1              | 0.99 | 0.93 | 0.81 | 0.66 | 0.50 | 0.34 | 0.21 | 0.08 | -0.03 | -0.12 | -0.24 | -0.31 | -0.37 | -0.45 | -0.58 | -0.67 | -0.64 |
| United States | G3940     | 1              | 0.98 | 0.95 | 0.94 | 0.94 | 0.93 | 0.92 | 0.90 | 0.89 | 0.86  | 0.84  | 0.78  | 0.70  | 0.63  | 0.55  | 0.49  | 0.37  | 0.30  |
| United States | G3946     | 1              | 1.00 | 0.99 | 0.99 | 0.98 | 0.97 | 0.96 | 0.95 | 0.93 | 0.92  | 0.91  | 0.89  | 0.87  | 0.86  | 0.85  | 0.84  | 0.83  | 0.83  |
| United States | G3951     | 1              | 1.00 | 0.99 | 0.99 | 0.99 | 0.98 | 0.96 | 0.92 | 0.88 | 0.82  | 0.75  | 0.61  | 0.45  | 0.31  | 0.19  | 0.08  | -0.07 | -0.06 |
| United States | G3952     | 1              | 1.00 | 0.99 | 0.98 | 0.98 | 0.97 | 0.96 | 0.94 | 0.93 | 0.91  | 0.89  | 0.85  | 0.80  | 0.75  | 0.69  | 0.64  | 0.51  | 0.41  |
| United States | G3953     | 1              | 0.98 | 0.90 | 0.78 | 0.67 | 0.58 | 0.51 | 0.45 | 0.40 | 0.37  | 0.34  | 0.30  | 0.25  | 0.23  | 0.15  | 0.08  | 0.03  | 0.02  |
| United States | G3963     | 1              | 0.95 | 0.84 | 0.75 | 0.67 | 0.59 | 0.54 | 0.48 | 0.45 | 0.42  | 0.38  | 0.34  | 0.28  | 0.27  | 0.17  | 0.10  | 0.04  | 0.04  |
| United States | G3976     | 1              | 0.99 | 0.98 | 0.95 | 0.93 | 0.89 | 0.85 | 0.80 | 0.75 | 0.70  | 0.66  | 0.58  | 0.49  | 0.41  | 0.35  | 0.30  | 0.19  | 0.12  |
| United States | G3984     | 1              | 1.00 | 0.99 | 0.98 | 0.97 | 0.95 | 0.93 | 0.91 | 0.87 | 0.83  | 0.78  | 0.65  | 0.52  | 0.40  | 0.32  | 0.24  | 0.15  | 0.11  |
| United States | G3988     | 1              | 1.00 | 0.99 | 0.97 | 0.95 | 0.93 | 0.90 | 0.87 | 0.83 | 0.79  | 0.76  | 0.69  | 0.64  | 0.58  | 0.53  | 0.49  | 0.41  | 0.36  |
| United States | G4008     | 1              | 0.94 | 0.84 | 0.75 | 0.70 | 0.64 | 0.61 | 0.58 | 0.54 | 0.50  | 0.46  | 0.41  | 0.39  | 0.35  | 0.32  | 0.32  | 0.29  | 0.28  |
| United States | G4009     | 1              | 0.98 | 0.93 | 0.87 | 0.81 | 0.74 | 0.66 | 0.60 | 0.56 | 0.51  | 0.46  | 0.40  | 0.32  | 0.26  | 0.21  | 0.17  | 0.10  | 0.05  |
| United States | G4013     | 1              | 1.00 | 0.99 | 0.98 | 0.97 | 0.96 | 0.94 | 0.93 | 0.91 | 0.90  | 0.88  | 0.85  | 0.82  | 0.79  | 0.76  | 0.73  | 0.67  | 0.62  |
| United States | G4014     | 1              | 0.98 | 0.91 | 0.80 | 0.70 | 0.60 | 0.52 | 0.45 | 0.40 | 0.36  | 0.32  | 0.26  | 0.21  | 0.17  | 0.09  | 0.01  | -0.06 | -0.08 |

| Country       | GloFAS ID | Station filter | LT1  | LT2  | LT3  | LT4  | LT5  | LT6   | LT7   | LT8   | LT9   | LT10  | LT12  | LT14  | LT16  | LT18  | LT20  | LT25  | L30   |
|---------------|-----------|----------------|------|------|------|------|------|-------|-------|-------|-------|-------|-------|-------|-------|-------|-------|-------|-------|
| United States | G4021     | 1              | 1.00 | 0.99 | 0.98 | 0.94 | 0.88 | 0.80  | 0.72  | 0.64  | 0.56  | 0.48  | 0.35  | 0.25  | 0.17  | 0.11  | 0.08  | 0.11  | 0.19  |
| United States | G4025     | 1              | 1.00 | 1.00 | 0.98 | 0.96 | 0.91 | 0.85  | 0.78  | 0.71  | 0.64  | 0.57  | 0.44  | 0.34  | 0.25  | 0.18  | 0.13  | 0.12  | 0.17  |
| United States | G4026     | 1              | 1.00 | 0.98 | 0.96 | 0.94 | 0.92 | 0.89  | 0.87  | 0.84  | 0.81  | 0.78  | 0.72  | 0.67  | 0.61  | 0.55  | 0.50  | 0.39  | 0.33  |
| United States | G4027     | 1              | 0.94 | 0.83 | 0.71 | 0.63 | 0.53 | 0.48  | 0.42  | 0.36  | 0.32  | 0.29  | 0.23  | 0.19  | 0.15  | 0.15  | 0.13  | 0.13  | 0.09  |
| United States | G4028     | 1              | 0.99 | 0.93 | 0.82 | 0.69 | 0.57 | 0.48  | 0.40  | 0.33  | 0.29  | 0.25  | 0.19  | 0.14  | 0.10  | 0.05  | -0.01 | -0.06 | -0.09 |
| United States | G4032     | 1              | 0.99 | 0.97 | 0.90 | 0.79 | 0.66 | 0.54  | 0.41  | 0.30  | 0.20  | 0.12  | -0.01 | -0.10 | -0.17 | -0.20 | -0.17 | -0.08 | -0.05 |
| United States | G4033     | 1              | 0.99 | 0.99 | 0.97 | 0.96 | 0.94 | 0.92  | 0.91  | 0.89  | 0.87  | 0.86  | 0.82  | 0.78  | 0.75  | 0.71  | 0.67  | 0.57  | 0.51  |
| United States | G4034     | 1              | 0.99 | 0.93 | 0.81 | 0.68 | 0.56 | 0.47  | 0.39  | 0.32  | 0.28  | 0.24  | 0.18  | 0.13  | 0.09  | 0.04  | -0.02 | -0.08 | -0.10 |
| United States | G4037     | 1              | 0.99 | 0.97 | 0.91 | 0.82 | 0.71 | 0.61  | 0.51  | 0.43  | 0.36  | 0.30  | 0.22  | 0.15  | 0.10  | 0.07  | 0.10  | 0.13  | 0.13  |
| United States | G4038     | 1              | 0.96 | 0.88 | 0.83 | 0.77 | 0.72 | 0.69  | 0.65  | 0.62  | 0.59  | 0.56  | 0.51  | 0.48  | 0.45  | 0.43  | 0.41  | 0.37  | 0.34  |
| United States | G4039     | 1              | 1.00 | 0.99 | 0.97 | 0.94 | 0.89 | 0.85  | 0.81  | 0.77  | 0.73  | 0.69  | 0.61  | 0.55  | 0.50  | 0.46  | 0.41  | 0.34  | 0.26  |
| United States | G4040     | 1              | 0.98 | 0.91 | 0.82 | 0.72 | 0.62 | 0.53  | 0.46  | 0.40  | 0.35  | 0.31  | 0.25  | 0.19  | 0.15  | 0.08  | 0.01  | -0.06 | -0.09 |
| United States | G4048     | 1              | 0.96 | 0.75 | 0.44 | 0.22 | 0.05 | -0.05 | -0.12 | -0.17 | -0.19 | -0.21 | -0.24 | -0.25 | -0.24 | -0.23 | -0.23 | -0.20 | -0.17 |
| United States | G4049     | 1              | 0.97 | 0.84 | 0.66 | 0.52 | 0.42 | 0.35  | 0.29  | 0.26  | 0.24  | 0.21  | 0.19  | 0.16  | 0.14  | 0.10  | 0.09  | 0.06  | 0.04  |
| United States | G4056     | 1              | 0.98 | 0.91 | 0.80 | 0.69 | 0.58 | 0.49  | 0.41  | 0.36  | 0.31  | 0.27  | 0.21  | 0.15  | 0.11  | 0.06  | -0.01 | -0.07 | -0.10 |
| United States | G4066     | 1              | 0.99 | 0.98 | 0.97 | 0.96 | 0.95 | 0.93  | 0.92  | 0.91  | 0.90  | 0.89  | 0.87  | 0.84  | 0.82  | 0.80  | 0.78  | 0.74  | 0.69  |
| United States | G4067     | 1              | 0.98 | 0.93 | 0.87 | 0.83 | 0.79 | 0.74  | 0.70  | 0.66  | 0.64  | 0.61  | 0.57  | 0.51  | 0.47  | 0.43  | 0.41  | 0.35  | 0.31  |
| United States | G4068     | 1              | 0.99 | 0.98 | 0.95 | 0.93 | 0.91 | 0.88  | 0.86  | 0.84  | 0.82  | 0.80  | 0.75  | 0.70  | 0.65  | 0.61  | 0.57  | 0.49  | 0.43  |
| United States | G4069     | 1              | 0.97 | 0.88 | 0.78 | 0.68 | 0.60 | 0.53  | 0.47  | 0.42  | 0.39  | 0.35  | 0.30  | 0.26  | 0.23  | 0.18  | 0.16  | 0.11  | 0.09  |
| United States | G4070     | 1              | 0.98 | 0.91 | 0.79 | 0.68 | 0.58 | 0.48  | 0.41  | 0.36  | 0.31  | 0.27  | 0.22  | 0.16  | 0.12  | 0.06  | -0.01 | -0.07 | -0.10 |
| United States | G4072     | 1              | 1.00 | 0.99 | 0.96 | 0.93 | 0.90 | 0.87  | 0.84  | 0.82  | 0.79  | 0.77  | 0.72  | 0.68  | 0.64  | 0.61  | 0.58  | 0.52  | 0.46  |
| United States | G4076     | 1              | 0.99 | 0.98 | 0.95 | 0.90 | 0.85 | 0.80  | 0.76  | 0.73  | 0.70  | 0.66  | 0.61  | 0.56  | 0.54  | 0.51  | 0.49  | 0.45  | 0.42  |
| United States | G4079     | 1              | 1.00 | 0.99 | 0.94 | 0.87 | 0.77 | 0.68  | 0.59  | 0.51  | 0.44  | 0.37  | 0.27  | 0.19  | 0.12  | 0.07  | 0.07  | 0.15  | 0.15  |
| United States | G4081     | 1              | 1.00 | 1.00 | 1.00 | 1.00 | 1.00 | 0.99  | 0.99  | 0.97  | 0.95  | 0.92  | 0.83  | 0.72  | 0.60  | 0.48  | 0.37  | 0.16  | 0.10  |
| United States | G4082     | 1              | 0.99 | 0.95 | 0.90 | 0.84 | 0.79 | 0.73  | 0.67  | 0.61  | 0.55  | 0.51  | 0.43  | 0.38  | 0.33  | 0.29  | 0.25  | 0.21  | 0.17  |
| United States | G4083     | 1              | 0.96 | 0.84 | 0.70 | 0.60 | 0.54 | 0.50  | 0.46  | 0.41  | 0.39  | 0.38  | 0.36  | 0.34  | 0.32  | 0.30  | 0.27  | 0.21  | 0.18  |
| United States | G4097     | 1              | 1.00 | 1.00 | 1.00 | 1.00 | 1.00 | 0.99  | 0.99  | 0.99  | 0.99  | 0.98  | 0.96  | 0.91  | 0.84  | 0.75  | 0.66  | 0.41  | 0.22  |
| United States | G4103     | 1              | 1.00 | 1.00 | 0.99 | 0.97 | 0.94 | 0.89  | 0.84  | 0.79  | 0.75  | 0.71  | 0.64  | 0.59  | 0.55  | 0.52  | 0.50  | 0.52  | 0.52  |
| United States | G4109     | 1              | 1.00 | 0.98 | 0.94 | 0.88 | 0.81 | 0.74  | 0.67  | 0.61  | 0.56  | 0.51  | 0.45  | 0.39  | 0.35  | 0.30  | 0.26  | 0.19  | 0.14  |
| United States | G4119     | 1              | 0.86 | 0.75 | 0.70 | 0.66 | 0.63 | 0.61  | 0.59  | 0.58  | 0.57  | 0.57  | 0.55  | 0.54  | 0.55  | 0.57  | 0.57  | 0.54  | 0.52  |
| United States | G4122     | 1              | 0.88 | 0.75 | 0.66 | 0.57 | 0.51 | 0.45  | 0.40  | 0.36  | 0.33  | 0.30  | 0.24  | 0.19  | 0.17  | 0.18  | 0.19  | 0.19  | 0.18  |
| United States | G4123     | 1              | 0.94 | 0.89 | 0.86 | 0.80 | 0.76 | 0.73  | 0.67  | 0.64  | 0.61  | 0.58  | 0.50  | 0.46  | 0.42  | 0.37  | 0.35  | 0.28  | 0.24  |
| United States | G4125     | 1              | 0.92 | 0.82 | 0.75 | 0.68 | 0.62 | 0.57  | 0.51  | 0.49  | 0.45  | 0.42  | 0.35  | 0.30  | 0.31  | 0.31  | 0.31  | 0.27  | 0.26  |
| United States | G4126     | 1              | 0.95 | 0.82 | 0.71 | 0.65 | 0.59 | 0.54  | 0.50  | 0.48  | 0.44  | 0.41  | 0.34  | 0.31  | 0.28  | 0.26  | 0.23  | 0.21  | 0.21  |
| United States | G4133     | 1              | 0.95 | 0.88 | 0.83 | 0.79 | 0.74 | 0.71  | 0.66  | 0.64  | 0.61  | 0.59  | 0.52  | 0.47  | 0.46  | 0.45  | 0.43  | 0.37  | 0.34  |
| United States | G4134     | 1              | 0.95 | 0.88 | 0.80 | 0.75 | 0.69 | 0.66  | 0.61  | 0.57  | 0.54  | 0.51  | 0.42  | 0.39  | 0.35  | 0.32  | 0.29  | 0.25  | 0.22  |
| United States | G4137     | 1              | 0.93 | 0.87 | 0.80 | 0.74 | 0.68 | 0.64  | 0.58  | 0.55  | 0.53  | 0.51  | 0.46  | 0.43  | 0.40  | 0.38  | 0.36  | 0.32  | 0.28  |
| United States | G4145     | 1              | 1.00 | 0.99 | 0.99 | 0.97 | 0.93 | 0.88  | 0.81  | 0.73  | 0.65  | 0.57  | 0.41  | 0.27  | 0.16  | 0.09  | 0.04  | 0.00  | 0.05  |
| United States | G4146     | 1              | 1.00 | 0.99 | 0.97 | 0.95 | 0.91 | 0.86  | 0.81  | 0.76  | 0.71  | 0.67  | 0.59  | 0.53  | 0.48  | 0.45  | 0.42  | 0.35  | 0.30  |



| Country       | GloFAS ID | Station filter | LT1  | LT2  | LT3  | LT4  | LT5  | LT6  | LT7  | LT8  | LT9  | LT10 | LT12 | LT14 | LT16 | LT18 | LT20 | LT25 | L30  |
|---------------|-----------|----------------|------|------|------|------|------|------|------|------|------|------|------|------|------|------|------|------|------|
| United States | G4152     | 1              | 0.93 | 0.82 | 0.76 | 0.70 | 0.64 | 0.60 | 0.56 | 0.50 | 0.46 | 0.44 | 0.36 | 0.34 | 0.29 | 0.28 | 0.25 | 0.25 | 0.22 |
| United States | G4153     | 1              | 0.94 | 0.89 | 0.86 | 0.83 | 0.79 | 0.77 | 0.74 | 0.71 | 0.69 | 0.67 | 0.62 | 0.60 | 0.55 | 0.52 | 0.49 | 0.44 | 0.38 |
| United States | G4157     | 1              | 0.91 | 0.87 | 0.85 | 0.82 | 0.77 | 0.76 | 0.73 | 0.69 | 0.68 | 0.68 | 0.62 | 0.61 | 0.56 | 0.55 | 0.52 | 0.47 | 0.40 |
| United States | G4158     | 1              | 1.00 | 1.00 | 0.99 | 0.97 | 0.94 | 0.92 | 0.89 | 0.85 | 0.82 | 0.79 | 0.72 | 0.65 | 0.59 | 0.54 | 0.50 | 0.41 | 0.34 |
| United States | G4160     | 1              | 0.93 | 0.86 | 0.82 | 0.77 | 0.73 | 0.70 | 0.66 | 0.62 | 0.59 | 0.57 | 0.50 | 0.48 | 0.42 | 0.41 | 0.38 | 0.36 | 0.30 |
| United States | G4161     | 1              | 0.88 | 0.78 | 0.74 | 0.69 | 0.60 | 0.54 | 0.50 | 0.46 | 0.45 | 0.43 | 0.36 | 0.34 | 0.30 | 0.30 | 0.27 | 0.26 | 0.21 |
| United States | G4163     | 1              | 0.93 | 0.85 | 0.80 | 0.75 | 0.69 | 0.64 | 0.58 | 0.56 | 0.54 | 0.52 | 0.46 | 0.44 | 0.40 | 0.38 | 0.35 | 0.33 | 0.29 |
| United States | G4197     | 1              | 0.90 | 0.84 | 0.80 | 0.73 | 0.68 | 0.64 | 0.62 | 0.59 | 0.56 | 0.54 | 0.47 | 0.45 | 0.39 | 0.37 | 0.36 | 0.30 | 0.28 |
| United States | G4198     | 1              | 0.92 | 0.84 | 0.77 | 0.71 | 0.68 | 0.62 | 0.59 | 0.58 | 0.56 | 0.52 | 0.46 | 0.42 | 0.41 | 0.38 | 0.35 | 0.30 | 0.30 |
| United States | G4204     | 1              | 1.00 | 0.99 | 0.99 | 0.99 | 0.98 | 0.98 | 0.98 | 0.98 | 0.97 | 0.97 | 0.97 | 0.97 | 0.96 | 0.96 | 0.95 | 0.95 | 0.94 |
| United States | G4206     | 1              | 0.99 | 0.96 | 0.93 | 0.91 | 0.90 | 0.86 | 0.79 | 0.76 | 0.73 | 0.67 | 0.63 | 0.54 | 0.49 | 0.44 | 0.44 | 0.37 | 0.32 |
| United States | G4207     | 1              | 0.92 | 0.84 | 0.79 | 0.73 | 0.68 | 0.64 | 0.60 | 0.58 | 0.56 | 0.53 | 0.46 | 0.42 | 0.39 | 0.36 | 0.35 | 0.29 | 0.28 |
| United States | G4219     | 1              | 1.00 | 0.98 | 0.97 | 0.94 | 0.92 | 0.89 | 0.86 | 0.82 | 0.79 | 0.75 | 0.69 | 0.64 | 0.59 | 0.53 | 0.48 | 0.40 | 0.34 |
| United States | G4220     | 1              | 1.00 | 1.00 | 1.00 | 0.99 | 0.99 | 0.98 | 0.97 | 0.95 | 0.92 | 0.88 | 0.78 | 0.69 | 0.61 | 0.55 | 0.49 | 0.36 | 0.27 |
| United States | G4229     | 1              | 1.00 | 0.98 | 0.95 | 0.90 | 0.85 | 0.82 | 0.79 | 0.76 | 0.73 | 0.70 | 0.64 | 0.59 | 0.55 | 0.51 | 0.47 | 0.39 | 0.34 |
| United States | G4230     | 1              | 1.00 | 0.98 | 0.93 | 0.87 | 0.82 | 0.76 | 0.71 | 0.68 | 0.65 | 0.61 | 0.57 | 0.53 | 0.51 | 0.49 | 0.49 | 0.46 | 0.43 |
| United States | G4231     | 1              | 1.00 | 1.00 | 0.99 | 0.99 | 0.99 | 0.98 | 0.97 | 0.95 | 0.92 | 0.88 | 0.79 | 0.70 | 0.62 | 0.56 | 0.50 | 0.37 | 0.28 |
| United States | G4232     | 1              | 1.00 | 0.97 | 0.91 | 0.84 | 0.79 | 0.73 | 0.68 | 0.64 | 0.60 | 0.57 | 0.51 | 0.47 | 0.44 | 0.41 | 0.40 | 0.35 | 0.31 |
| United States | G4234     | 1              | 0.99 | 0.97 | 0.95 | 0.94 | 0.91 | 0.87 | 0.84 | 0.81 | 0.75 | 0.71 | 0.66 | 0.59 | 0.53 | 0.50 | 0.46 | 0.40 | 0.36 |
| United States | G4235     | 1              | 0.98 | 0.88 | 0.74 | 0.64 | 0.59 | 0.55 | 0.52 | 0.49 | 0.47 | 0.44 | 0.42 | 0.38 | 0.36 | 0.33 | 0.31 | 0.26 | 0.24 |
| United States | G4236     | 1              | 1.00 | 0.96 | 0.92 | 0.87 | 0.83 | 0.77 | 0.72 | 0.69 | 0.65 | 0.61 | 0.56 | 0.49 | 0.44 | 0.41 | 0.39 | 0.32 | 0.29 |
| United States | G4237     | 1              | 1.00 | 0.99 | 0.97 | 0.94 | 0.91 | 0.87 | 0.84 | 0.80 | 0.76 | 0.73 | 0.67 | 0.63 | 0.59 | 0.55 | 0.52 | 0.45 | 0.40 |
| United States | G4238     | 1              | 1.00 | 1.00 | 0.97 | 0.94 | 0.93 | 0.90 | 0.86 | 0.81 | 0.78 | 0.73 | 0.66 | 0.61 | 0.54 | 0.48 | 0.46 | 0.38 | 0.33 |
| United States | G4242     | 1              | 1.00 | 1.00 | 1.00 | 0.99 | 0.99 | 0.97 | 0.96 | 0.95 | 0.93 | 0.92 | 0.89 | 0.85 | 0.81 | 0.77 | 0.74 | 0.67 | 0.61 |
| United States | G4244     | 1              | 1.00 | 0.99 | 0.99 | 0.98 | 0.95 | 0.90 | 0.86 | 0.84 | 0.83 | 0.82 | 0.80 | 0.73 | 0.65 | 0.59 | 0.55 | 0.44 | 0.34 |
| United States | G4245     | 1              | 1.00 | 1.00 | 1.00 | 1.00 | 0.99 | 0.99 | 0.98 | 0.96 | 0.95 | 0.93 | 0.90 | 0.86 | 0.83 | 0.79 | 0.76 | 0.71 | 0.66 |
| United States | G4248     | 1              | 1.00 | 0.99 | 0.99 | 0.99 | 0.98 | 0.98 | 0.98 | 0.97 | 0.97 | 0.96 | 0.96 | 0.95 | 0.94 | 0.93 | 0.92 | 0.89 | 0.85 |
| United States | G4253     | 1              | 0.98 | 0.94 | 0.89 | 0.82 | 0.77 | 0.71 | 0.66 | 0.61 | 0.57 | 0.52 | 0.45 | 0.39 | 0.34 | 0.31 | 0.30 | 0.24 | 0.19 |
| United States | G4263     | 1              | 1.00 | 0.99 | 0.99 | 0.98 | 0.97 | 0.96 | 0.95 | 0.94 | 0.93 | 0.92 | 0.89 | 0.86 | 0.83 | 0.80 | 0.77 | 0.69 | 0.61 |
| United States | G4270     | 1              | 0.97 | 0.91 | 0.85 | 0.82 | 0.78 | 0.75 | 0.73 | 0.71 | 0.69 | 0.66 | 0.64 | 0.61 | 0.59 | 0.57 | 0.55 | 0.50 | 0.46 |
| United States | G4281     | 1              | 1.00 | 1.00 | 0.99 | 0.98 | 0.97 | 0.95 | 0.92 | 0.90 | 0.87 | 0.84 | 0.79 | 0.74 | 0.70 | 0.66 | 0.63 | 0.56 | 0.52 |
| United States | G4287     | 1              | 1.00 | 0.99 | 0.97 | 0.95 | 0.93 | 0.90 | 0.87 | 0.84 | 0.80 | 0.77 | 0.71 | 0.65 | 0.61 | 0.57 | 0.53 | 0.46 | 0.41 |
| United States | G4305     | 1              | 1.00 | 0.99 | 0.96 | 0.93 | 0.89 | 0.86 | 0.82 | 0.78 | 0.73 | 0.69 | 0.62 | 0.56 | 0.50 | 0.45 | 0.42 | 0.32 | 0.26 |
| United States | G4314     | 1              | 1.00 | 1.00 | 0.99 | 0.99 | 0.98 | 0.96 | 0.94 | 0.91 | 0.88 | 0.86 | 0.79 | 0.73 | 0.67 | 0.62 | 0.58 | 0.48 | 0.41 |
| United States | G4336     | 1              | 0.97 | 0.92 | 0.83 | 0.75 | 0.67 | 0.61 | 0.56 | 0.50 | 0.45 | 0.42 | 0.36 | 0.35 | 0.31 | 0.29 | 0.26 | 0.21 | 0.18 |
| United States | G4340     | 1              | 0.99 | 0.98 | 0.97 | 0.95 | 0.94 | 0.93 | 0.91 | 0.90 | 0.88 | 0.87 | 0.84 | 0.81 | 0.78 | 0.76 | 0.74 | 0.69 | 0.64 |
| United States | G4365     | 1              | 0.99 | 0.98 | 0.97 | 0.97 | 0.96 | 0.96 | 0.95 | 0.95 | 0.94 | 0.94 | 0.92 | 0.91 | 0.90 | 0.89 | 0.88 | 0.86 | 0.83 |
| United States | G4366     | 1              | 1.00 | 1.00 | 0.99 | 0.99 | 0.98 | 0.98 | 0.98 | 0.97 | 0.97 | 0.97 | 0.96 | 0.95 | 0.95 | 0.94 | 0.93 | 0.92 | 0.89 |
| United States | G4370     | 1              | 0.99 | 0.94 | 0.92 | 0.90 | 0.89 | 0.89 | 0.88 | 0.86 | 0.85 | 0.84 | 0.81 | 0.80 | 0.78 | 0.76 | 0.76 | 0.74 | 0.73 |



| Country       | GloFAS ID | Station filter | LT1  | LT2  | LT3  | LT4  | LT5  | LT6  | LT7  | LT8  | LT9  | LT10 | LT12 | LT14 | LT16 | LT18 | LT20 | LT25 | L30  |
|---------------|-----------|----------------|------|------|------|------|------|------|------|------|------|------|------|------|------|------|------|------|------|
| United States | G4371     | 1              | 0.99 | 0.95 | 0.91 | 0.89 | 0.88 | 0.86 | 0.84 | 0.82 | 0.79 | 0.77 | 0.74 | 0.71 | 0.66 | 0.64 | 0.61 | 0.55 | 0.50 |
| United States | G4427     | 1              | 0.99 | 0.94 | 0.84 | 0.76 | 0.70 | 0.64 | 0.58 | 0.56 | 0.53 | 0.50 | 0.45 | 0.40 | 0.36 | 0.34 | 0.31 | 0.26 | 0.22 |
| United States | G4508     | 1              | 1.00 | 0.99 | 0.98 | 0.97 | 0.95 | 0.94 | 0.92 | 0.90 | 0.88 | 0.88 | 0.86 | 0.85 | 0.82 | 0.83 | 0.81 | 0.80 | 0.76 |
| United States | G5038     | 1              | 1.00 | 1.00 | 1.00 | 0.99 | 0.99 | 0.98 | 0.97 | 0.97 | 0.96 | 0.95 | 0.94 | 0.93 | 0.92 | 0.91 | 0.90 | 0.88 | 0.86 |
| United States | G5088     | 1              | 0.99 | 0.99 | 0.98 | 0.98 | 0.97 | 0.97 | 0.97 | 0.96 | 0.96 | 0.96 | 0.95 | 0.94 | 0.94 | 0.93 | 0.93 | 0.91 | 0.89 |
| United States | G5089     | 1              | 0.98 | 0.97 | 0.96 | 0.93 | 0.92 | 0.92 | 0.91 | 0.90 | 0.89 | 0.89 | 0.88 | 0.87 | 0.86 | 0.85 | 0.86 | 0.83 | 0.80 |

Table 6: GloFAS climatology skill scores for South America.

| Country   | GloFAS ID | Station filter | LT1  | LT2  | LT3  | LT4  | LT5  | LT6  | LT7   | LT8   | LT9   | LT10  | LT12  | LT14  | LT16  | LT18  | LT20  | LT25  | L30   |
|-----------|-----------|----------------|------|------|------|------|------|------|-------|-------|-------|-------|-------|-------|-------|-------|-------|-------|-------|
| Argentina | G1477     | 1              | 1.00 | 1.00 | 0.99 | 0.98 | 0.98 | 0.97 | 0.95  | 0.94  | 0.92  | 0.89  | 0.85  | 0.79  | 0.73  | 0.67  | 0.62  | 0.49  | 0.39  |
| Argentina | G1839     | 1              | 1.00 | 1.00 | 1.00 | 0.99 | 0.99 | 0.98 | 0.96  | 0.94  | 0.92  | 0.89  | 0.84  | 0.77  | 0.72  | 0.66  | 0.60  | 0.48  | 0.38  |
| Argentina | G1840     | 1              | 1.00 | 1.00 | 1.00 | 0.99 | 0.99 | 0.98 | 0.98  | 0.97  | 0.96  | 0.96  | 0.94  | 0.92  | 0.90  | 0.86  | 0.82  | 0.69  | 0.56  |
| Argentina | G1841     | 1              | 1.00 | 1.00 | 1.00 | 0.99 | 0.99 | 0.98 | 0.98  | 0.97  | 0.97  | 0.96  | 0.94  | 0.92  | 0.89  | 0.85  | 0.81  | 0.67  | 0.54  |
| Argentina | G1842     | 1              | 1.00 | 1.00 | 1.00 | 0.99 | 0.99 | 0.99 | 0.98  | 0.98  | 0.97  | 0.97  | 0.95  | 0.93  | 0.90  | 0.86  | 0.82  | 0.70  | 0.60  |
| Argentina | G1843     | 1              | 1.00 | 1.00 | 1.00 | 0.99 | 0.99 | 0.99 | 0.98  | 0.98  | 0.97  | 0.96  | 0.94  | 0.91  | 0.88  | 0.84  | 0.79  | 0.67  | 0.58  |
| Argentina | G1844     | 1              | 1.00 | 1.00 | 1.00 | 0.99 | 0.99 | 0.98 | 0.98  | 0.97  | 0.96  | 0.95  | 0.92  | 0.88  | 0.84  | 0.79  | 0.75  | 0.64  | 0.54  |
| Argentina | G1846     | 1              | 1.00 | 0.99 | 0.95 | 0.88 | 0.80 | 0.74 | 0.70  | 0.66  | 0.63  | 0.59  | 0.53  | 0.48  | 0.43  | 0.38  | 0.33  | 0.26  | 0.22  |
| Argentina | G1855     | 1              | 1.00 | 1.00 | 0.99 | 0.99 | 0.98 | 0.97 | 0.95  | 0.93  | 0.90  | 0.87  | 0.80  | 0.72  | 0.64  | 0.56  | 0.48  | 0.32  | 0.20  |
| Argentina | G1887     | 1              | 1.00 | 1.00 | 0.99 | 0.93 | 0.82 | 0.67 | 0.52  | 0.39  | 0.27  | 0.15  | -0.02 | -0.16 | -0.24 | -0.29 | -0.34 | -0.37 | -0.31 |
| Argentina | G1888     | 1              | 0.84 | 0.84 | 0.84 | 0.83 | 0.72 | 0.69 | 0.72  | 0.58  | 0.59  | 0.62  | 0.51  | 0.59  | 0.50  | 0.58  | 0.47  | 0.51  | 0.41  |
| Argentina | G2002     | 1              | 1.00 | 0.99 | 0.98 | 0.96 | 0.94 | 0.91 | 0.89  | 0.86  | 0.83  | 0.81  | 0.75  | 0.69  | 0.63  | 0.58  | 0.52  | 0.41  | 0.30  |
| Argentina | G5886     | 1              | 0.91 | 0.70 | 0.53 | 0.41 | 0.32 | 0.25 | 0.17  | 0.13  | 0.08  | 0.01  | -0.06 | -0.11 | -0.16 | -0.16 | -0.17 | -0.14 | -0.08 |
| Argentina | G5888     | 1              | 0.91 | 0.66 | 0.43 | 0.27 | 0.15 | 0.05 | -0.02 | -0.08 | -0.14 | -0.18 | -0.25 | -0.28 | -0.31 | -0.33 | -0.35 | -0.30 | -0.20 |
| Argentina | G5905     | 1              | 0.98 | 0.86 | 0.75 | 0.70 | 0.66 | 0.62 | 0.60  | 0.57  | 0.54  | 0.51  | 0.46  | 0.41  | 0.38  | 0.33  | 0.30  | 0.25  | 0.22  |
| Argentina | G5917     | 1              | 0.99 | 0.98 | 0.97 | 0.96 | 0.95 | 0.93 | 0.92  | 0.90  | 0.88  | 0.86  | 0.79  | 0.68  | 0.53  | 0.32  | 0.10  | -0.46 | -0.85 |
| Argentina | G5921     | 1              | 1.00 | 0.99 | 0.99 | 0.98 | 0.96 | 0.93 | 0.91  | 0.88  | 0.84  | 0.78  | 0.66  | 0.51  | 0.34  | 0.16  | 0.00  | -0.37 | -0.61 |
| Argentina | G5924     | 1              | 0.99 | 0.98 | 0.95 | 0.92 | 0.89 | 0.84 | 0.80  | 0.75  | 0.71  | 0.66  | 0.57  | 0.49  | 0.40  | 0.34  | 0.28  | 0.19  | 0.09  |
| Argentina | G5926     | 1              | 1.00 | 1.00 | 0.99 | 0.97 | 0.91 | 0.84 | 0.77  | 0.68  | 0.59  | 0.50  | 0.34  | 0.20  | 0.04  | -0.10 | -0.20 | -0.45 | -0.66 |
| Argentina | G5927     | 1              | 1.00 | 1.00 | 0.99 | 0.97 | 0.90 | 0.78 | 0.64  | 0.50  | 0.38  | 0.26  | 0.05  | -0.11 | -0.21 | -0.27 | -0.32 | -0.38 | -0.32 |
| Argentina | G5930     | 1              | 1.00 | 0.99 | 0.98 | 0.95 | 0.91 | 0.87 | 0.80  | 0.74  | 0.69  | 0.64  | 0.52  | 0.43  | 0.35  | 0.27  | 0.22  | 0.12  | 0.03  |
| Argentina | G5931     | 1              | 1.00 | 1.00 | 0.99 | 0.97 | 0.92 | 0.86 | 0.80  | 0.72  | 0.63  | 0.55  | 0.39  | 0.26  | 0.12  | -0.02 | -0.11 | -0.34 | -0.52 |
| Argentina | G5933     | 1              | 1.00 | 0.99 | 0.99 | 0.97 | 0.96 | 0.94 | 0.92  | 0.90  | 0.88  | 0.87  | 0.82  | 0.77  | 0.71  | 0.65  | 0.59  | 0.45  | 0.35  |
| Argentina | G5935     | 1              | 1.00 | 0.99 | 0.98 | 0.96 | 0.94 | 0.92 | 0.89  | 0.86  | 0.83  | 0.79  | 0.70  | 0.59  | 0.47  | 0.35  | 0.22  | -0.07 | -0.29 |
| Argentina | G5946     | 1              | 1.00 | 1.00 | 1.00 | 1.00 | 0.99 | 0.96 | 0.90  | 0.80  | 0.69  | 0.57  | 0.34  | 0.12  | -0.05 | -0.17 | -0.25 | -0.39 | -0.40 |
| Argentina | G5963     | 1              | 1.00 | 1.00 | 1.00 | 0.99 | 0.99 | 0.98 | 0.97  | 0.97  | 0.96  | 0.94  | 0.91  | 0.87  | 0.82  | 0.78  | 0.73  | 0.62  | 0.53  |
| Argentina | G5964     | 1              | 1.00 | 1.00 | 1.00 | 1.00 | 0.99 | 0.99 | 0.99  | 0.99  | 0.99  | 0.98  | 0.98  | 0.97  | 0.95  | 0.93  | 0.92  | 0.87  | 0.81  |

| Country   | GloFAS ID | Station filter | LT1  | LT2  | LT3  | LT4  | LT5   | LT6   | LT7   | LT8   | LT9   | LT10  | LT12  | LT14  | LT16  | LT18  | LT20  | LT25  | L30   |
|-----------|-----------|----------------|------|------|------|------|-------|-------|-------|-------|-------|-------|-------|-------|-------|-------|-------|-------|-------|
| Argentina | G5966     | 1              | 1.00 | 0.99 | 0.96 | 0.91 | 0.87  | 0.83  | 0.77  | 0.72  | 0.67  | 0.62  | 0.53  | 0.44  | 0.37  | 0.30  | 0.25  | 0.15  | 0.09  |
| Argentina | G5967     | 1              | 0.99 | 0.92 | 0.73 | 0.50 | 0.17  | -0.19 | -0.50 | -0.79 | -1.05 | -1.23 | -1.52 | -1.69 | -1.83 | -1.88 | -1.93 | -1.86 | -1.74 |
| Argentina | G5968     | 1              | 1.00 | 0.97 | 0.90 | 0.77 | 0.58  | 0.35  | 0.12  | -0.11 | -0.33 | -0.54 | -0.89 | -1.20 | -1.47 | -1.70 | -1.96 | -2.52 | -2.68 |
| Argentina | G5977     | 1              | 0.98 | 0.88 | 0.77 | 0.70 | 0.66  | 0.62  | 0.60  | 0.58  | 0.54  | 0.51  | 0.46  | 0.41  | 0.37  | 0.33  | 0.29  | 0.24  | 0.21  |
| Argentina | G5985     | 1              | 1.00 | 0.99 | 0.96 | 0.88 | 0.75  | 0.56  | 0.30  | 0.02  | -0.25 | -0.52 | -0.97 | -1.32 | -1.60 | -1.83 | -2.05 | -2.53 | -2.66 |
| Argentina | G5986     | 1              | 0.99 | 0.97 | 0.93 | 0.89 | 0.83  | 0.76  | 0.68  | 0.61  | 0.53  | 0.46  | 0.35  | 0.28  | 0.21  | 0.15  | 0.10  | 0.00  | -0.06 |
| Argentina | G5988     | 1              | 0.93 | 0.79 | 0.49 | 0.02 | -0.49 | -0.96 | -1.34 | -1.65 | -1.92 | -2.16 | -2.48 | -2.70 | -2.81 | -2.92 | -2.95 | -2.67 | -2.34 |
| Argentina | G5992     | 1              | 0.99 | 0.96 | 0.91 | 0.83 | 0.75  | 0.66  | 0.57  | 0.48  | 0.38  | 0.28  | 0.10  | -0.06 | -0.22 | -0.34 | -0.43 | -0.59 | -0.62 |
| Argentina | G5993     | 1              | 1.00 | 1.00 | 1.00 | 1.00 | 0.99  | 0.99  | 0.98  | 0.98  | 0.97  | 0.96  | 0.94  | 0.92  | 0.89  | 0.85  | 0.80  | 0.69  | 0.59  |
| Argentina | G5995     | 1              | 1.00 | 0.98 | 0.96 | 0.90 | 0.80  | 0.58  | 0.20  | -0.35 | -1.08 | -1.95 | -3.74 | -5.22 | -6.30 | -7.04 | -7.58 | -8.23 | -8.27 |
| Argentina | G5996     | 1              | 1.00 | 0.98 | 0.96 | 0.91 | 0.87  | 0.82  | 0.77  | 0.72  | 0.68  | 0.64  | 0.55  | 0.46  | 0.40  | 0.35  | 0.30  | 0.22  | 0.17  |
| Argentina | G6005     | 1              | 0.99 | 0.87 | 0.70 | 0.54 | 0.41  | 0.29  | 0.20  | 0.12  | 0.04  | -0.02 | -0.13 | -0.21 | -0.28 | -0.31 | -0.30 | -0.35 | -0.39 |
| Argentina | G6006     | 1              | 1.00 | 0.96 | 0.85 | 0.66 | 0.33  | -0.15 | -0.72 | -1.28 | -1.77 | -2.17 | -2.78 | -3.17 | -3.43 | -3.59 | -3.76 | -3.71 | -3.36 |
| Argentina | G6007     | 1              | 1.00 | 0.99 | 0.98 | 0.97 | 0.95  | 0.94  | 0.91  | 0.88  | 0.83  | 0.77  | 0.54  | 0.21  | -0.18 | -0.57 | -0.90 | -1.54 | -2.00 |
| Argentina | G6008     | 1              | 1.00 | 0.99 | 0.98 | 0.95 | 0.92  | 0.87  | 0.82  | 0.77  | 0.72  | 0.67  | 0.58  | 0.49  | 0.42  | 0.37  | 0.33  | 0.24  | 0.17  |
| Argentina | G6010     | 1              | 1.00 | 1.00 | 1.00 | 1.00 | 0.99  | 0.99  | 0.98  | 0.98  | 0.97  | 0.96  | 0.94  | 0.92  | 0.89  | 0.85  | 0.80  | 0.69  | 0.59  |
| Argentina | G6011     | 1              | 1.00 | 0.99 | 0.98 | 0.98 | 0.96  | 0.94  | 0.92  | 0.89  | 0.86  | 0.82  | 0.76  | 0.69  | 0.64  | 0.59  | 0.54  | 0.43  | 0.34  |
| Argentina | G6014     | 1              | 1.00 | 0.99 | 0.95 | 0.86 | 0.72  | 0.50  | 0.23  | -0.07 | -0.36 | -0.61 | -1.00 | -1.29 | -1.49 | -1.61 | -1.68 | -1.72 | -1.63 |
| Argentina | G6017     | 1              | 1.00 | 0.99 | 0.98 | 0.96 | 0.93  | 0.89  | 0.85  | 0.81  | 0.76  | 0.72  | 0.64  | 0.58  | 0.52  | 0.47  | 0.42  | 0.33  | 0.26  |
| Argentina | G6019     | 1              | 0.98 | 0.88 | 0.81 | 0.74 | 0.63  | 0.49  | 0.32  | 0.11  | -0.13 | -0.37 | -0.79 | -1.11 | -1.34 | -1.50 | -1.63 | -1.81 | -1.79 |
| Argentina | G6025     | 1              | 1.00 | 0.99 | 0.98 | 0.96 | 0.94  | 0.91  | 0.85  | 0.79  | 0.73  | 0.64  | 0.40  | 0.10  | -0.21 | -0.51 | -0.78 | -1.22 | -1.41 |
| Argentina | G6036     | 1              | 1.00 | 0.98 | 0.96 | 0.94 | 0.92  | 0.89  | 0.85  | 0.82  | 0.79  | 0.75  | 0.66  | 0.55  | 0.39  | 0.19  | -0.03 | -0.49 | -0.83 |
| Argentina | G6038     | 1              | 0.99 | 0.97 | 0.93 | 0.88 | 0.83  | 0.78  | 0.72  | 0.67  | 0.63  | 0.60  | 0.53  | 0.47  | 0.42  | 0.38  | 0.35  | 0.28  | 0.23  |
| Argentina | G6045     | 1              | 1.00 | 0.98 | 0.94 | 0.87 | 0.79  | 0.71  | 0.63  | 0.54  | 0.45  | 0.38  | 0.24  | 0.12  | 0.03  | -0.03 | -0.08 | -0.13 | -0.14 |
| Argentina | G6047     | 1              | 0.99 | 0.95 | 0.85 | 0.74 | 0.66  | 0.57  | 0.47  | 0.40  | 0.34  | 0.29  | 0.18  | 0.09  | 0.04  | -0.01 | -0.03 | -0.05 | -0.05 |
| Argentina | G6050     | 1              | 1.00 | 1.00 | 1.00 | 0.99 | 0.99  | 0.98  | 0.98  | 0.97  | 0.96  | 0.96  | 0.94  | 0.92  | 0.90  | 0.87  | 0.83  | 0.70  | 0.56  |
| Argentina | G6051     | 1              | 1.00 | 0.99 | 0.97 | 0.94 | 0.91  | 0.86  | 0.81  | 0.76  | 0.72  | 0.68  | 0.61  | 0.54  | 0.47  | 0.42  | 0.37  | 0.28  | 0.22  |
| Argentina | G6052     | 1              | 1.00 | 0.99 | 0.97 | 0.94 | 0.85  | 0.67  | 0.40  | 0.06  | -0.30 | -0.63 | -1.17 | -1.54 | -1.78 | -1.93 | -2.02 | -2.06 | -1.88 |
| Argentina | G6053     | 1              | 0.75 | 0.58 | 0.54 | 0.53 | 0.52  | 0.50  | 0.48  | 0.45  | 0.42  | 0.39  | 0.38  | 0.36  | 0.34  | 0.20  | 0.21  | 0.20  | 0.20  |
| Argentina | G6054     | 1              | 1.00 | 1.00 | 1.00 | 0.99 | 0.99  | 0.99  | 0.98  | 0.97  | 0.97  | 0.96  | 0.94  | 0.93  | 0.91  | 0.88  | 0.85  | 0.75  | 0.61  |
| Argentina | G6055     | 1              | 0.99 | 0.96 | 0.91 | 0.83 | 0.76  | 0.69  | 0.61  | 0.54  | 0.48  | 0.42  | 0.33  | 0.27  | 0.22  | 0.17  | 0.14  | 0.06  | 0.04  |
| Argentina | G6059     | 1              | 0.95 | 0.82 | 0.76 | 0.62 | 0.47  | 0.43  | 0.49  | 0.50  | 0.54  | 0.59  | 0.45  | 0.53  | 0.51  | 0.53  | 0.51  | 0.48  | 0.47  |
| Argentina | G6060     | 1              | 1.00 | 0.98 | 0.95 | 0.92 | 0.88  | 0.84  | 0.79  | 0.74  | 0.69  | 0.63  | 0.53  | 0.44  | 0.35  | 0.28  | 0.22  | 0.10  | 0.03  |
| Argentina | G6062     | 1              | 1.00 | 0.99 | 0.96 | 0.92 | 0.89  | 0.86  | 0.82  | 0.77  | 0.74  | 0.70  | 0.63  | 0.56  | 0.49  | 0.44  | 0.39  | 0.29  | 0.22  |
| Argentina | G6063     | 1              | 1.00 | 0.99 | 0.96 | 0.93 | 0.89  | 0.85  | 0.81  | 0.77  | 0.72  | 0.67  | 0.59  | 0.50  | 0.42  | 0.36  | 0.31  | 0.20  | 0.12  |
| Argentina | G6065     | 1              | 1.00 | 0.98 | 0.95 | 0.89 | 0.83  | 0.77  | 0.71  | 0.65  | 0.60  | 0.56  | 0.49  | 0.43  | 0.37  | 0.33  | 0.30  | 0.25  | 0.22  |
| Argentina | G6066     | 1              | 1.00 | 0.99 | 0.99 | 0.97 | 0.95  | 0.91  | 0.87  | 0.82  | 0.78  | 0.73  | 0.64  | 0.57  | 0.49  | 0.42  | 0.36  | 0.26  | 0.19  |
| Argentina | G6068     | 1              | 1.00 | 1.00 | 0.99 | 0.99 | 0.99  | 0.98  | 0.98  | 0.98  | 0.98  | 0.97  | 0.97  | 0.96  | 0.95  | 0.95  | 0.94  | 0.92  | 0.87  |
| Argentina | G6069     | 1              | 0.89 | 0.78 | 0.68 | 0.61 | 0.57  | 0.52  | 0.47  | 0.43  | 0.39  | 0.34  | 0.27  | 0.22  | 0.23  | 0.26  | 0.27  | 0.22  | 0.19  |

| Country   | GloFAS ID | Station filter | LT1  | LT2  | LT3  | LT4  | LT5  | LT6  | LT7  | LT8   | LT9   | LT10  | LT12  | LT14  | LT16  | LT18  | LT20  | LT25  | L30   |
|-----------|-----------|----------------|------|------|------|------|------|------|------|-------|-------|-------|-------|-------|-------|-------|-------|-------|-------|
| Argentina | G6071     | 1              | 1.00 | 1.00 | 0.99 | 0.99 | 0.99 | 0.99 | 0.99 | 0.99  | 0.99  | 0.99  | 0.98  | 0.98  | 0.98  | 0.98  | 0.98  | 0.98  | 0.98  |
| Argentina | G6072     | 1              | 0.96 | 0.80 | 0.66 | 0.56 | 0.50 | 0.46 | 0.42 | 0.38  | 0.36  | 0.33  | 0.27  | 0.24  | 0.23  | 0.33  | 0.37  | 0.37  | 0.36  |
| Argentina | G6073     | 1              | 0.97 | 0.89 | 0.80 | 0.73 | 0.67 | 0.62 | 0.59 | 0.56  | 0.53  | 0.50  | 0.45  | 0.40  | 0.37  | 0.33  | 0.29  | 0.28  | 0.26  |
| Argentina | G6074     | 1              | 1.00 | 1.00 | 1.00 | 0.99 | 0.99 | 0.98 | 0.97 | 0.96  | 0.93  | 0.88  | 0.65  | 0.16  | -0.44 | -0.98 | -1.36 | -1.77 | -1.84 |
| Argentina | G6079     | 1              | 1.00 | 1.00 | 1.00 | 1.00 | 1.00 | 0.99 | 0.99 | 0.99  | 0.99  | 0.99  | 0.98  | 0.97  | 0.97  | 0.96  | 0.96  | 0.94  | 0.92  |
| Bolivia   | G1262     | 1              | 0.98 | 0.94 | 0.87 | 0.81 | 0.74 | 0.67 | 0.61 | 0.57  | 0.52  | 0.48  | 0.42  | 0.35  | 0.30  | 0.26  | 0.22  | 0.14  | 0.09  |
| Bolivia   | G1308     | 1              | 1.00 | 0.99 | 0.99 | 0.98 | 0.96 | 0.95 | 0.93 | 0.91  | 0.88  | 0.86  | 0.79  | 0.72  | 0.65  | 0.57  | 0.49  | 0.32  | 0.17  |
| Bolivia   | G1316     | 1              | 0.99 | 0.97 | 0.94 | 0.90 | 0.84 | 0.79 | 0.72 | 0.65  | 0.58  | 0.52  | 0.40  | 0.30  | 0.23  | 0.17  | 0.11  | -0.01 | -0.12 |
| Bolivia   | G1408     | 1              | 1.00 | 0.99 | 0.98 | 0.95 | 0.92 | 0.88 | 0.83 | 0.79  | 0.74  | 0.71  | 0.64  | 0.59  | 0.55  | 0.49  | 0.45  | 0.37  | 0.32  |
| Bolivia   | G1880     | 1              | 1.00 | 1.00 | 0.99 | 0.99 | 0.98 | 0.98 | 0.97 | 0.96  | 0.94  | 0.93  | 0.90  | 0.86  | 0.82  | 0.78  | 0.73  | 0.60  | 0.46  |
| Bolivia   | G1881     | 1              | 1.00 | 0.99 | 0.99 | 0.98 | 0.97 | 0.97 | 0.96 | 0.94  | 0.93  | 0.92  | 0.89  | 0.85  | 0.80  | 0.75  | 0.70  | 0.59  | 0.49  |
| Bolivia   | G1882     | 1              | 1.00 | 1.00 | 0.99 | 0.99 | 0.98 | 0.96 | 0.94 | 0.91  | 0.88  | 0.85  | 0.79  | 0.73  | 0.67  | 0.61  | 0.55  | 0.45  | 0.36  |
| Bolivia   | G1883     | 1              | 1.00 | 1.00 | 0.99 | 0.98 | 0.96 | 0.93 | 0.89 | 0.83  | 0.76  | 0.69  | 0.54  | 0.43  | 0.34  | 0.26  | 0.20  | 0.08  | 0.02  |
| Bolivia   | G1884     | 1              | 1.00 | 0.99 | 0.97 | 0.94 | 0.90 | 0.87 | 0.83 | 0.80  | 0.77  | 0.74  | 0.67  | 0.62  | 0.57  | 0.53  | 0.49  | 0.41  | 0.34  |
| Bolivia   | G1885     | 1              | 0.99 | 0.93 | 0.86 | 0.78 | 0.72 | 0.66 | 0.62 | 0.57  | 0.54  | 0.51  | 0.45  | 0.40  | 0.34  | 0.29  | 0.23  | 0.13  | 0.06  |
| Bolivia   | G1886     | 1              | 0.99 | 0.96 | 0.92 | 0.87 | 0.83 | 0.80 | 0.76 | 0.72  | 0.69  | 0.67  | 0.61  | 0.56  | 0.52  | 0.48  | 0.44  | 0.36  | 0.29  |
| Bolivia   | G1975     | 1              | 1.00 | 1.00 | 0.98 | 0.96 | 0.92 | 0.88 | 0.85 | 0.82  | 0.79  | 0.76  | 0.71  | 0.66  | 0.60  | 0.55  | 0.50  | 0.41  | 0.35  |
| Bolivia   | G1976     | 1              | 1.00 | 1.00 | 0.98 | 0.93 | 0.87 | 0.80 | 0.75 | 0.69  | 0.64  | 0.60  | 0.53  | 0.46  | 0.39  | 0.33  | 0.29  | 0.26  | 0.22  |
| Bolivia   | G1977     | 1              | 0.99 | 0.93 | 0.85 | 0.78 | 0.71 | 0.66 | 0.62 | 0.57  | 0.53  | 0.49  | 0.41  | 0.34  | 0.26  | 0.19  | 0.13  | 0.02  | -0.05 |
| Bolivia   | G1996     | 1              | 0.97 | 0.85 | 0.70 | 0.58 | 0.44 | 0.28 | 0.13 | -0.01 | -0.16 | -0.28 | -0.53 | -0.68 | -0.82 | -0.94 | -1.09 | -1.28 | -1.26 |
| Bolivia   | G1997     | 1              | 1.00 | 0.99 | 0.96 | 0.92 | 0.87 | 0.81 | 0.74 | 0.67  | 0.59  | 0.51  | 0.35  | 0.19  | 0.06  | -0.06 | -0.15 | -0.28 | -0.34 |
| Bolivia   | G1998     | 1              | 1.00 | 0.99 | 0.97 | 0.94 | 0.89 | 0.84 | 0.77 | 0.70  | 0.63  | 0.55  | 0.38  | 0.22  | 0.07  | -0.06 | -0.17 | -0.33 | -0.39 |
| Bolivia   | G1999     | 1              | 1.00 | 1.00 | 1.00 | 0.99 | 0.99 | 0.98 | 0.98 | 0.96  | 0.95  | 0.93  | 0.89  | 0.85  | 0.80  | 0.75  | 0.70  | 0.59  | 0.49  |
| Bolivia   | G2000     | 1              | 0.93 | 0.77 | 0.63 | 0.52 | 0.43 | 0.35 | 0.29 | 0.24  | 0.20  | 0.16  | 0.09  | 0.02  | -0.01 | -0.05 | -0.06 | -0.07 | -0.04 |
| Bolivia   | G5574     | 1              | 1.00 | 1.00 | 0.99 | 0.99 | 0.98 | 0.97 | 0.95 | 0.93  | 0.90  | 0.86  | 0.77  | 0.67  | 0.57  | 0.48  | 0.41  | 0.25  | 0.13  |
| Bolivia   | G5585     | 1              | 0.99 | 0.98 | 0.95 | 0.92 | 0.88 | 0.84 | 0.79 | 0.74  | 0.69  | 0.65  | 0.57  | 0.49  | 0.43  | 0.36  | 0.30  | 0.15  | 0.04  |
| Bolivia   | G5587     | 1              | 1.00 | 1.00 | 0.99 | 0.98 | 0.97 | 0.95 | 0.92 | 0.87  | 0.81  | 0.74  | 0.59  | 0.47  | 0.37  | 0.29  | 0.23  | 0.11  | 0.00  |
| Bolivia   | G5588     | 1              | 1.00 | 1.00 | 0.99 | 0.98 | 0.97 | 0.96 | 0.94 | 0.91  | 0.87  | 0.82  | 0.71  | 0.61  | 0.51  | 0.43  | 0.36  | 0.21  | 0.10  |
| Bolivia   | G5595     | 1              | 0.99 | 0.96 | 0.92 | 0.87 | 0.81 | 0.75 | 0.70 | 0.66  | 0.61  | 0.57  | 0.50  | 0.44  | 0.39  | 0.34  | 0.30  | 0.20  | 0.12  |
| Bolivia   | G5596     | 1              | 0.99 | 0.95 | 0.90 | 0.84 | 0.78 | 0.71 | 0.65 | 0.60  | 0.55  | 0.50  | 0.41  | 0.34  | 0.27  | 0.20  | 0.14  | 0.01  | -0.10 |
| Bolivia   | G5626     | 1              | 1.00 | 0.99 | 0.99 | 0.98 | 0.96 | 0.93 | 0.88 | 0.81  | 0.74  | 0.66  | 0.52  | 0.41  | 0.32  | 0.25  | 0.20  | 0.08  | -0.02 |
| Bolivia   | G5627     | 1              | 1.00 | 0.99 | 0.98 | 0.96 | 0.94 | 0.92 | 0.90 | 0.88  | 0.86  | 0.84  | 0.79  | 0.75  | 0.72  | 0.67  | 0.63  | 0.53  | 0.44  |
| Bolivia   | G5628     | 1              | 1.00 | 1.00 | 0.99 | 0.99 | 0.98 | 0.97 | 0.96 | 0.95  | 0.93  | 0.91  | 0.85  | 0.80  | 0.74  | 0.68  | 0.61  | 0.45  | 0.33  |
| Bolivia   | G5633     | 1              | 1.00 | 1.00 | 0.98 | 0.95 | 0.89 | 0.81 | 0.72 | 0.62  | 0.53  | 0.45  | 0.33  | 0.24  | 0.16  | 0.10  | 0.05  | -0.03 | -0.03 |
| Bolivia   | G5634     | 1              | 1.00 | 0.99 | 0.98 | 0.95 | 0.93 | 0.90 | 0.86 | 0.83  | 0.80  | 0.77  | 0.70  | 0.64  | 0.59  | 0.54  | 0.50  | 0.40  | 0.31  |
| Bolivia   | G5635     | 1              | 1.00 | 0.99 | 0.98 | 0.97 | 0.96 | 0.94 | 0.93 | 0.92  | 0.91  | 0.90  | 0.87  | 0.85  | 0.82  | 0.78  | 0.74  | 0.63  | 0.54  |
| Bolivia   | G5638     | 1              | 0.99 | 0.98 | 0.96 | 0.94 | 0.92 | 0.90 | 0.87 | 0.84  | 0.80  | 0.76  | 0.70  | 0.63  | 0.56  | 0.49  | 0.43  | 0.30  | 0.19  |
| Bolivia   | G5643     | 1              | 1.00 | 0.99 | 0.98 | 0.96 | 0.93 | 0.89 | 0.85 | 0.80  | 0.74  | 0.67  | 0.56  | 0.44  | 0.34  | 0.27  | 0.20  | 0.07  | -0.05 |
| Bolivia   | G5644     | 1              | 0.99 | 0.98 | 0.95 | 0.92 | 0.88 | 0.84 | 0.79 | 0.74  | 0.70  | 0.65  | 0.57  | 0.50  | 0.44  | 0.38  | 0.32  | 0.19  | 0.10  |

| Country | GloFAS ID | Station filter | LT1  | LT2  | LT3  | LT4   | LT5   | LT6   | LT7   | LT8   | LT9   | LT10  | LT12  | LT14  | LT16  | LT18  | LT20  | LT25  | L30   |
|---------|-----------|----------------|------|------|------|-------|-------|-------|-------|-------|-------|-------|-------|-------|-------|-------|-------|-------|-------|
| Bolivia | G5645     | 1              | 1.00 | 1.00 | 0.99 | 0.98  | 0.96  | 0.94  | 0.92  | 0.89  | 0.86  | 0.84  | 0.79  | 0.73  | 0.68  | 0.63  | 0.59  | 0.48  | 0.40  |
| Bolivia | G5646     | 1              | 1.00 | 1.00 | 1.00 | 0.99  | 0.99  | 0.98  | 0.96  | 0.94  | 0.92  | 0.89  | 0.84  | 0.79  | 0.74  | 0.68  | 0.64  | 0.52  | 0.44  |
| Bolivia | G5647     | 1              | 1.00 | 0.99 | 0.97 | 0.95  | 0.91  | 0.88  | 0.84  | 0.81  | 0.79  | 0.76  | 0.70  | 0.65  | 0.61  | 0.56  | 0.52  | 0.44  | 0.38  |
| Bolivia | G5648     | 1              | 0.99 | 0.97 | 0.95 | 0.92  | 0.88  | 0.84  | 0.79  | 0.75  | 0.71  | 0.66  | 0.58  | 0.49  | 0.42  | 0.36  | 0.31  | 0.21  | 0.12  |
| Bolivia | G5650     | 1              | 0.98 | 0.96 | 0.94 | 0.91  | 0.87  | 0.83  | 0.78  | 0.74  | 0.70  | 0.66  | 0.58  | 0.49  | 0.43  | 0.36  | 0.31  | 0.20  | 0.12  |
| Bolivia | G5659     | 1              | 0.93 | 0.75 | 0.61 | 0.50  | 0.40  | 0.31  | 0.23  | 0.18  | 0.13  | 0.09  | 0.03  | -0.04 | -0.08 | -0.12 | -0.13 | -0.11 | -0.08 |
| Bolivia | G5666     | 1              | 0.85 | 0.58 | 0.44 | 0.35  | 0.27  | 0.21  | 0.17  | 0.12  | 0.07  | 0.03  | -0.02 | -0.09 | -0.13 | -0.18 | -0.21 | -0.25 | -0.32 |
| Bolivia | G5667     | 1              | 0.95 | 0.81 | 0.64 | 0.43  | 0.20  | 0.01  | -0.14 | -0.23 | -0.28 | -0.33 | -0.39 | -0.44 | -0.46 | -0.52 | -0.60 | -0.57 | -0.41 |
| Bolivia | G5680     | 1              | 0.83 | 0.54 | 0.24 | -0.11 | -0.39 | -0.60 | -0.74 | -0.79 | -0.82 | -0.88 | -0.88 | -0.90 | -0.84 | -0.88 | -0.89 | -0.71 | -0.49 |
| Bolivia | G5681     | 1              | 0.92 | 0.75 | 0.60 | 0.41  | 0.24  | 0.13  | 0.03  | -0.04 | -0.08 | -0.12 | -0.19 | -0.23 | -0.27 | -0.37 | -0.49 | -0.48 | -0.36 |
| Bolivia | G5682     | 1              | 1.00 | 1.00 | 0.99 | 0.98  | 0.97  | 0.96  | 0.94  | 0.93  | 0.90  | 0.88  | 0.83  | 0.77  | 0.71  | 0.66  | 0.60  | 0.47  | 0.35  |
| Bolivia | G5718     | 1              | 1.00 | 0.99 | 0.98 | 0.95  | 0.92  | 0.88  | 0.85  | 0.81  | 0.76  | 0.72  | 0.64  | 0.57  | 0.50  | 0.44  | 0.39  | 0.27  | 0.21  |
| Bolivia | G5724     | 1              | 1.00 | 0.98 | 0.96 | 0.93  | 0.89  | 0.85  | 0.81  | 0.77  | 0.72  | 0.68  | 0.60  | 0.53  | 0.46  | 0.40  | 0.34  | 0.23  | 0.16  |
| Bolivia | G5728     | 1              | 1.00 | 1.00 | 0.99 | 0.99  | 0.99  | 0.99  | 0.98  | 0.98  | 0.97  | 0.96  | 0.95  | 0.93  | 0.90  | 0.87  | 0.83  | 0.69  | 0.54  |
| Bolivia | G5729     | 1              | 0.98 | 0.93 | 0.90 | 0.87  | 0.83  | 0.79  | 0.75  | 0.72  | 0.68  | 0.65  | 0.59  | 0.53  | 0.47  | 0.43  | 0.38  | 0.29  | 0.22  |
| Bolivia | G5736     | 1              | 1.00 | 1.00 | 0.99 | 0.99  | 0.98  | 0.98  | 0.97  | 0.97  | 0.96  | 0.95  | 0.93  | 0.90  | 0.85  | 0.80  | 0.72  | 0.51  | 0.32  |
| Bolivia | G5737     | 1              | 1.00 | 0.99 | 0.98 | 0.96  | 0.94  | 0.92  | 0.89  | 0.85  | 0.81  | 0.76  | 0.66  | 0.57  | 0.49  | 0.42  | 0.35  | 0.25  | 0.18  |
| Bolivia | G5778     | 1              | 1.00 | 0.99 | 0.99 | 0.98  | 0.97  | 0.95  | 0.92  | 0.87  | 0.82  | 0.76  | 0.61  | 0.43  | 0.24  | 0.04  | -0.16 | -0.61 | -0.90 |
| Bolivia | G5786     | 1              | 1.00 | 0.98 | 0.97 | 0.96  | 0.95  | 0.94  | 0.93  | 0.93  | 0.92  | 0.92  | 0.92  | 0.90  | 0.86  | 0.79  | 0.70  | 0.36  | -0.05 |
| Bolivia | G5790     | 1              | 1.00 | 0.99 | 0.98 | 0.97  | 0.95  | 0.94  | 0.91  | 0.89  | 0.86  | 0.83  | 0.77  | 0.70  | 0.64  | 0.59  | 0.54  | 0.43  | 0.34  |
| Bolivia | G5794     | 1              | 1.00 | 0.99 | 0.97 | 0.96  | 0.94  | 0.90  | 0.87  | 0.83  | 0.79  | 0.74  | 0.65  | 0.56  | 0.49  | 0.43  | 0.38  | 0.28  | 0.21  |
| Bolivia | G5823     | 1              | 0.89 | 0.74 | 0.64 | 0.53  | 0.42  | 0.33  | 0.24  | 0.16  | 0.09  | -0.01 | -0.15 | -0.25 | -0.35 | -0.49 | -0.66 | -0.84 | -0.80 |
| Bolivia | G5838     | 1              | 0.97 | 0.83 | 0.46 | -0.10 | -0.69 | -1.26 | -1.75 | -2.13 | -2.49 | -2.78 | -3.13 | -3.39 | -3.57 | -3.73 | -3.77 | -3.70 | -3.39 |
| Bolivia | G5839     | 1              | 0.89 | 0.75 | 0.63 | 0.49  | 0.29  | 0.09  | -0.12 | -0.33 | -0.51 | -0.67 | -0.91 | -1.07 | -1.19 | -1.35 | -1.43 | -1.56 | -1.41 |
| Brazil  | G1116     | 1              | 0.99 | 0.95 | 0.89 | 0.83  | 0.76  | 0.71  | 0.66  | 0.63  | 0.59  | 0.56  | 0.51  | 0.46  | 0.42  | 0.37  | 0.33  | 0.26  | 0.20  |
| Brazil  | G1118     | 1              | 0.91 | 0.67 | 0.44 | 0.38  | 0.35  | 0.33  | 0.30  | 0.27  | 0.25  | 0.23  | 0.19  | 0.15  | 0.10  | -0.01 | -0.10 | -0.20 | -0.23 |
| Brazil  | G1120     | 1              | 0.98 | 0.93 | 0.82 | 0.70  | 0.59  | 0.49  | 0.41  | 0.34  | 0.28  | 0.23  | 0.15  | 0.09  | 0.04  | -0.01 | -0.09 | -0.26 | -0.33 |
| Brazil  | G1121     | 1              | 0.98 | 0.93 | 0.84 | 0.73  | 0.63  | 0.53  | 0.45  | 0.38  | 0.31  | 0.25  | 0.15  | 0.09  | 0.03  | -0.02 | -0.09 | -0.27 | -0.35 |
| Brazil  | G1124     | 1              | 0.92 | 0.77 | 0.66 | 0.56  | 0.48  | 0.44  | 0.38  | 0.32  | 0.28  | 0.25  | 0.16  | 0.10  | 0.05  | -0.04 | -0.10 | -0.22 | -0.31 |
| Brazil  | G1127     | 1              | 1.00 | 0.98 | 0.97 | 0.96  | 0.94  | 0.91  | 0.86  | 0.80  | 0.73  | 0.65  | 0.51  | 0.38  | 0.28  | 0.21  | 0.16  | 0.03  | -0.07 |
| Brazil  | G1128     | 1              | 1.00 | 0.99 | 0.97 | 0.96  | 0.93  | 0.90  | 0.87  | 0.82  | 0.76  | 0.69  | 0.55  | 0.41  | 0.31  | 0.23  | 0.17  | 0.04  | -0.07 |
| Brazil  | G1129     | 1              | 0.98 | 0.92 | 0.85 | 0.76  | 0.66  | 0.58  | 0.50  | 0.42  | 0.35  | 0.29  | 0.18  | 0.10  | 0.03  | -0.03 | -0.10 | -0.27 | -0.37 |
| Brazil  | G1131     | 1              | 0.98 | 0.95 | 0.89 | 0.82  | 0.74  | 0.64  | 0.54  | 0.44  | 0.33  | 0.23  | 0.08  | -0.01 | -0.05 | -0.07 | -0.08 | -0.11 | -0.12 |
| Brazil  | G1132     | 1              | 0.98 | 0.94 | 0.88 | 0.81  | 0.75  | 0.70  | 0.65  | 0.60  | 0.56  | 0.52  | 0.45  | 0.39  | 0.34  | 0.28  | 0.24  | 0.15  | 0.10  |
| Brazil  | G1133     | 1              | 0.93 | 0.73 | 0.49 | 0.36  | 0.29  | 0.23  | 0.20  | 0.17  | 0.14  | 0.12  | 0.07  | 0.04  | 0.00  | -0.03 | -0.06 | -0.18 | -0.26 |
| Brazil  | G1134     | 1              | 0.99 | 0.95 | 0.90 | 0.84  | 0.77  | 0.70  | 0.64  | 0.57  | 0.51  | 0.46  | 0.37  | 0.30  | 0.23  | 0.18  | 0.13  | 0.05  | 0.01  |
| Brazil  | G1136     | 1              | 0.98 | 0.93 | 0.86 | 0.80  | 0.75  | 0.70  | 0.66  | 0.62  | 0.58  | 0.55  | 0.47  | 0.41  | 0.35  | 0.30  | 0.26  | 0.16  | 0.08  |
| Brazil  | G1137     | 1              | 1.00 | 0.98 | 0.96 | 0.93  | 0.89  | 0.85  | 0.80  | 0.75  | 0.69  | 0.62  | 0.49  | 0.36  | 0.26  | 0.19  | 0.13  | 0.01  | -0.09 |
| Brazil  | G1138     | 1              | 0.99 | 0.98 | 0.95 | 0.91  | 0.86  | 0.80  | 0.75  | 0.71  | 0.67  | 0.63  | 0.56  | 0.48  | 0.42  | 0.37  | 0.31  | 0.19  | 0.10  |

| Country | GloFAS ID | Station filter | LT1  | LT2  | LT3  | LT4  | LT5  | LT6  | LT7  | LT8  | LT9  | LT10 | LT12 | LT14 | LT16 | LT18  | LT20  | LT25  | L30   |
|---------|-----------|----------------|------|------|------|------|------|------|------|------|------|------|------|------|------|-------|-------|-------|-------|
| Brazil  | G1139     | 1              | 1.00 | 0.99 | 0.98 | 0.97 | 0.95 | 0.93 | 0.89 | 0.86 | 0.81 | 0.77 | 0.65 | 0.53 | 0.41 | 0.31  | 0.23  | 0.09  | -0.03 |
| Brazil  | G1140     | 1              | 0.99 | 0.96 | 0.93 | 0.88 | 0.81 | 0.74 | 0.67 | 0.61 | 0.54 | 0.48 | 0.38 | 0.31 | 0.25 | 0.20  | 0.16  | 0.08  | 0.01  |
| Brazil  | G1141     | 1              | 0.99 | 0.96 | 0.91 | 0.85 | 0.80 | 0.74 | 0.68 | 0.64 | 0.59 | 0.55 | 0.47 | 0.40 | 0.34 | 0.28  | 0.23  | 0.12  | 0.04  |
| Brazil  | G1142     | 1              | 1.00 | 0.99 | 0.98 | 0.97 | 0.95 | 0.93 | 0.91 | 0.88 | 0.85 | 0.82 | 0.75 | 0.67 | 0.57 | 0.47  | 0.38  | 0.19  | 0.05  |
| Brazil  | G1143     | 1              | 0.96 | 0.78 | 0.61 | 0.51 | 0.44 | 0.39 | 0.35 | 0.32 | 0.29 | 0.26 | 0.22 | 0.20 | 0.17 | 0.15  | 0.12  | 0.08  | 0.06  |
| Brazil  | G1144     | 1              | 0.98 | 0.92 | 0.82 | 0.71 | 0.62 | 0.54 | 0.46 | 0.40 | 0.34 | 0.29 | 0.20 | 0.12 | 0.06 | -0.03 | -0.10 | -0.23 | -0.30 |
| Brazil  | G1145     | 1              | 0.98 | 0.94 | 0.87 | 0.78 | 0.69 | 0.60 | 0.53 | 0.45 | 0.39 | 0.34 | 0.25 | 0.17 | 0.09 | 0.02  | -0.04 | -0.18 | -0.26 |
| Brazil  | G1146     | 1              | 0.98 | 0.94 | 0.87 | 0.78 | 0.69 | 0.61 | 0.53 | 0.46 | 0.39 | 0.34 | 0.25 | 0.17 | 0.09 | 0.02  | -0.05 | -0.19 | -0.28 |
| Brazil  | G1147     | 1              | 0.99 | 0.96 | 0.92 | 0.85 | 0.78 | 0.70 | 0.63 | 0.55 | 0.48 | 0.42 | 0.32 | 0.24 | 0.16 | 0.09  | 0.01  | -0.15 | -0.26 |
| Brazil  | G1148     | 1              | 1.00 | 0.99 | 0.97 | 0.92 | 0.86 | 0.78 | 0.70 | 0.62 | 0.55 | 0.48 | 0.36 | 0.27 | 0.19 | 0.12  | 0.04  | -0.13 | -0.24 |
| Brazil  | G1149     | 1              | 0.99 | 0.98 | 0.96 | 0.94 | 0.92 | 0.90 | 0.87 | 0.84 | 0.81 | 0.77 | 0.71 | 0.64 | 0.57 | 0.51  | 0.46  | 0.32  | 0.19  |
| Brazil  | G1151     | 1              | 0.98 | 0.91 | 0.83 | 0.75 | 0.67 | 0.60 | 0.54 | 0.49 | 0.44 | 0.39 | 0.31 | 0.24 | 0.18 | 0.12  | 0.07  | -0.03 | -0.10 |
| Brazil  | G1152     | 1              | 0.91 | 0.77 | 0.69 | 0.62 | 0.54 | 0.48 | 0.43 | 0.38 | 0.33 | 0.29 | 0.21 | 0.15 | 0.09 | 0.02  | -0.03 | -0.11 | -0.15 |
| Brazil  | G1153     | 1              | 0.97 | 0.92 | 0.86 | 0.81 | 0.74 | 0.68 | 0.64 | 0.58 | 0.53 | 0.48 | 0.39 | 0.32 | 0.25 | 0.17  | 0.10  | -0.04 | -0.11 |
| Brazil  | G1154     | 1              | 0.98 | 0.94 | 0.87 | 0.79 | 0.71 | 0.66 | 0.62 | 0.58 | 0.55 | 0.53 | 0.47 | 0.44 | 0.42 | 0.39  | 0.37  | 0.31  | 0.28  |
| Brazil  | G1155     | 1              | 1.00 | 0.99 | 0.98 | 0.98 | 0.97 | 0.96 | 0.95 | 0.94 | 0.94 | 0.93 | 0.90 | 0.87 | 0.82 | 0.76  | 0.69  | 0.48  | 0.32  |
| Brazil  | G1156     | 1              | 1.00 | 1.00 | 1.00 | 0.99 | 0.99 | 0.99 | 0.98 | 0.98 | 0.97 | 0.96 | 0.95 | 0.92 | 0.90 | 0.88  | 0.85  | 0.77  | 0.68  |
| Brazil  | G1157     | 1              | 0.99 | 0.98 | 0.97 | 0.95 | 0.94 | 0.92 | 0.89 | 0.87 | 0.84 | 0.80 | 0.72 | 0.64 | 0.55 | 0.47  | 0.39  | 0.21  | 0.06  |
| Brazil  | G1158     | 1              | 1.00 | 1.00 | 1.00 | 0.99 | 0.99 | 0.99 | 0.98 | 0.98 | 0.97 | 0.96 | 0.95 | 0.92 | 0.90 | 0.88  | 0.85  | 0.77  | 0.68  |
| Brazil  | G1159     | 1              | 0.99 | 0.98 | 0.96 | 0.95 | 0.93 | 0.91 | 0.89 | 0.86 | 0.83 | 0.80 | 0.72 | 0.64 | 0.56 | 0.47  | 0.39  | 0.21  | 0.05  |
| Brazil  | G1160     | 1              | 0.98 | 0.95 | 0.91 | 0.88 | 0.83 | 0.79 | 0.75 | 0.71 | 0.68 | 0.65 | 0.60 | 0.55 | 0.50 | 0.46  | 0.43  | 0.36  | 0.31  |
| Brazil  | G1161     | 1              | 1.00 | 1.00 | 0.99 | 0.99 | 0.99 | 0.99 | 0.98 | 0.98 | 0.97 | 0.97 | 0.96 | 0.94 | 0.92 | 0.89  | 0.86  | 0.77  | 0.68  |
| Brazil  | G1162     | 1              | 1.00 | 1.00 | 0.99 | 0.99 | 0.98 | 0.98 | 0.97 | 0.96 | 0.96 | 0.95 | 0.93 | 0.91 | 0.88 | 0.85  | 0.82  | 0.73  | 0.64  |
| Brazil  | G1163     | 1              | 1.00 | 1.00 | 0.99 | 0.99 | 0.99 | 0.98 | 0.98 | 0.98 | 0.97 | 0.97 | 0.95 | 0.94 | 0.91 | 0.89  | 0.85  | 0.76  | 0.67  |
| Brazil  | G1164     | 1              | 1.00 | 1.00 | 0.99 | 0.98 | 0.97 | 0.96 | 0.94 | 0.93 | 0.91 | 0.89 | 0.85 | 0.81 | 0.76 | 0.71  | 0.66  | 0.54  | 0.43  |
| Brazil  | G1165     | 1              | 1.00 | 1.00 | 1.00 | 0.99 | 0.99 | 0.99 | 0.98 | 0.98 | 0.98 | 0.97 | 0.96 | 0.95 | 0.94 | 0.93  | 0.91  | 0.86  | 0.81  |
| Brazil  | G1166     | 1              | 0.95 | 0.85 | 0.76 | 0.70 | 0.66 | 0.62 | 0.59 | 0.57 | 0.54 | 0.52 | 0.50 | 0.46 | 0.44 | 0.41  | 0.38  | 0.32  | 0.28  |
| Brazil  | G1167     | 1              | 1.00 | 1.00 | 0.99 | 0.99 | 0.98 | 0.97 | 0.97 | 0.96 | 0.95 | 0.94 | 0.92 | 0.90 | 0.87 | 0.83  | 0.80  | 0.71  | 0.61  |
| Brazil  | G1168     | 1              | 1.00 | 0.99 | 0.96 | 0.92 | 0.88 | 0.85 | 0.81 | 0.77 | 0.74 | 0.70 | 0.63 | 0.58 | 0.55 | 0.52  | 0.49  | 0.43  | 0.38  |
| Brazil  | G1169     | 1              | 0.92 | 0.83 | 0.75 | 0.68 | 0.65 | 0.62 | 0.58 | 0.55 | 0.53 | 0.50 | 0.45 | 0.43 | 0.40 | 0.38  | 0.35  | 0.33  | 0.30  |
| Brazil  | G1170     | 1              | 0.96 | 0.91 | 0.88 | 0.84 | 0.80 | 0.76 | 0.72 | 0.68 | 0.64 | 0.61 | 0.54 | 0.48 | 0.45 | 0.41  | 0.38  | 0.33  | 0.29  |
| Brazil  | G1171     | 1              | 0.98 | 0.91 | 0.82 | 0.75 | 0.69 | 0.64 | 0.58 | 0.55 | 0.53 | 0.50 | 0.47 | 0.42 | 0.40 | 0.39  | 0.37  | 0.33  | 0.31  |
| Brazil  | G1172     | 1              | 0.98 | 0.93 | 0.83 | 0.72 | 0.64 | 0.57 | 0.51 | 0.48 | 0.45 | 0.42 | 0.39 | 0.35 | 0.34 | 0.31  | 0.28  | 0.26  | 0.25  |
| Brazil  | G1173     | 1              | 0.98 | 0.93 | 0.86 | 0.76 | 0.67 | 0.57 | 0.50 | 0.44 | 0.38 | 0.34 | 0.26 | 0.20 | 0.15 | 0.10  | 0.06  | 0.00  | -0.05 |
| Brazil  | G1174     | 1              | 1.00 | 1.00 | 1.00 | 0.99 | 0.99 | 0.99 | 0.99 | 0.98 | 0.98 | 0.97 | 0.96 | 0.95 | 0.93 | 0.91  | 0.89  | 0.84  | 0.78  |
| Brazil  | G1175     | 1              | 0.98 | 0.88 | 0.72 | 0.59 | 0.51 | 0.44 | 0.39 | 0.35 | 0.34 | 0.32 | 0.30 | 0.27 | 0.26 | 0.23  | 0.20  | 0.20  | 0.18  |
| Brazil  | G1176     | 1              | 1.00 | 1.00 | 1.00 | 1.00 | 0.99 | 0.99 | 0.99 | 0.98 | 0.98 | 0.97 | 0.96 | 0.95 | 0.94 | 0.92  | 0.90  | 0.85  | 0.78  |
| Brazil  | G1177     | 1              | 0.94 | 0.88 | 0.84 | 0.78 | 0.71 | 0.64 | 0.57 | 0.50 | 0.44 | 0.39 | 0.29 | 0.22 | 0.18 | 0.15  | 0.13  | 0.08  | 0.05  |
| Brazil  | G1178     | 1              | 0.94 | 0.87 | 0.80 | 0.73 | 0.66 | 0.58 | 0.53 | 0.48 | 0.44 | 0.41 | 0.36 | 0.33 | 0.31 | 0.29  | 0.27  | 0.22  | 0.17  |

| Country | GloFAS ID | Station filter | LT1  | LT2  | LT3  | LT4  | LT5  | LT6  | LT7  | LT8  | LT9  | LT10  | LT12  | LT14  | LT16  | LT18  | LT20  | LT25  | L30   |
|---------|-----------|----------------|------|------|------|------|------|------|------|------|------|-------|-------|-------|-------|-------|-------|-------|-------|
| Brazil  | G1179     | 1              | 0.99 | 0.96 | 0.93 | 0.88 | 0.83 | 0.78 | 0.73 | 0.68 | 0.63 | 0.58  | 0.50  | 0.44  | 0.39  | 0.34  | 0.31  | 0.22  | 0.11  |
| Brazil  | G1181     | 1              | 0.98 | 0.92 | 0.83 | 0.71 | 0.60 | 0.51 | 0.44 | 0.38 | 0.35 | 0.33  | 0.29  | 0.28  | 0.26  | 0.24  | 0.23  | 0.18  | 0.11  |
| Brazil  | G1183     | 1              | 0.99 | 0.96 | 0.93 | 0.90 | 0.86 | 0.83 | 0.80 | 0.76 | 0.73 | 0.70  | 0.63  | 0.56  | 0.50  | 0.44  | 0.39  | 0.26  | 0.17  |
| Brazil  | G1184     | 1              | 0.99 | 0.97 | 0.95 | 0.92 | 0.89 | 0.85 | 0.80 | 0.74 | 0.67 | 0.60  | 0.49  | 0.39  | 0.32  | 0.27  | 0.24  | 0.17  | 0.12  |
| Brazil  | G1185     | 1              | 1.00 | 1.00 | 0.99 | 0.99 | 0.98 | 0.98 | 0.97 | 0.96 | 0.95 | 0.94  | 0.92  | 0.89  | 0.86  | 0.83  | 0.79  | 0.68  | 0.54  |
| Brazil  | G1186     | 1              | 0.99 | 0.96 | 0.93 | 0.89 | 0.85 | 0.81 | 0.76 | 0.72 | 0.68 | 0.64  | 0.57  | 0.51  | 0.47  | 0.43  | 0.39  | 0.31  | 0.24  |
| Brazil  | G1187     | 1              | 0.99 | 0.96 | 0.93 | 0.89 | 0.85 | 0.80 | 0.76 | 0.71 | 0.67 | 0.63  | 0.56  | 0.51  | 0.46  | 0.42  | 0.38  | 0.30  | 0.23  |
| Brazil  | G1188     | 1              | 1.00 | 0.99 | 0.99 | 0.98 | 0.97 | 0.96 | 0.95 | 0.95 | 0.94 | 0.93  | 0.90  | 0.86  | 0.80  | 0.72  | 0.64  | 0.48  | 0.35  |
| Brazil  | G1189     | 1              | 0.99 | 0.98 | 0.95 | 0.90 | 0.85 | 0.79 | 0.74 | 0.69 | 0.64 | 0.59  | 0.52  | 0.46  | 0.41  | 0.38  | 0.36  | 0.30  | 0.26  |
| Brazil  | G1190     | 1              | 1.00 | 1.00 | 1.00 | 0.99 | 0.99 | 0.99 | 0.99 | 0.98 | 0.98 | 0.97  | 0.96  | 0.94  | 0.93  | 0.91  | 0.89  | 0.83  | 0.73  |
| Brazil  | G1191     | 1              | 0.94 | 0.82 | 0.71 | 0.68 | 0.67 | 0.64 | 0.63 | 0.61 | 0.60 | 0.57  | 0.55  | 0.50  | 0.49  | 0.45  | 0.43  | 0.41  | 0.39  |
| Brazil  | G1192     | 1              | 1.00 | 0.99 | 0.98 | 0.97 | 0.96 | 0.94 | 0.92 | 0.90 | 0.88 | 0.87  | 0.84  | 0.82  | 0.80  | 0.77  | 0.75  | 0.69  | 0.62  |
| Brazil  | G1194     | 1              | 0.96 | 0.92 | 0.89 | 0.86 | 0.84 | 0.81 | 0.78 | 0.76 | 0.74 | 0.71  | 0.66  | 0.61  | 0.56  | 0.50  | 0.44  | 0.30  | 0.18  |
| Brazil  | G1195     | 1              | 0.98 | 0.86 | 0.74 | 0.68 | 0.63 | 0.57 | 0.54 | 0.53 | 0.49 | 0.46  | 0.44  | 0.41  | 0.39  | 0.38  | 0.36  | 0.34  | 0.33  |
| Brazil  | G1196     | 1              | 0.97 | 0.90 | 0.85 | 0.83 | 0.80 | 0.77 | 0.73 | 0.72 | 0.69 | 0.66  | 0.63  | 0.57  | 0.55  | 0.54  | 0.50  | 0.47  | 0.43  |
| Brazil  | G1197     | 1              | 0.99 | 0.96 | 0.91 | 0.87 | 0.83 | 0.78 | 0.73 | 0.69 | 0.65 | 0.61  | 0.55  | 0.48  | 0.44  | 0.41  | 0.39  | 0.35  | 0.34  |
| Brazil  | G1198     | 1              | 0.99 | 0.98 | 0.97 | 0.96 | 0.94 | 0.92 | 0.90 | 0.88 | 0.87 | 0.86  | 0.83  | 0.81  | 0.79  | 0.77  | 0.74  | 0.68  | 0.61  |
| Brazil  | G1199     | 1              | 0.98 | 0.92 | 0.83 | 0.72 | 0.62 | 0.51 | 0.42 | 0.36 | 0.31 | 0.27  | 0.22  | 0.19  | 0.18  | 0.17  | 0.16  | 0.14  | 0.11  |
| Brazil  | G1200     | 1              | 1.00 | 0.98 | 0.93 | 0.88 | 0.83 | 0.80 | 0.76 | 0.73 | 0.70 | 0.67  | 0.61  | 0.56  | 0.51  | 0.47  | 0.43  | 0.33  | 0.25  |
| Brazil  | G1201     | 1              | 1.00 | 1.00 | 0.99 | 0.99 | 0.98 | 0.98 | 0.97 | 0.97 | 0.96 | 0.96  | 0.94  | 0.93  | 0.90  | 0.88  | 0.85  | 0.76  | 0.68  |
| Brazil  | G1202     | 1              | 0.99 | 0.98 | 0.95 | 0.93 | 0.89 | 0.86 | 0.82 | 0.78 | 0.74 | 0.70  | 0.62  | 0.54  | 0.46  | 0.40  | 0.34  | 0.21  | 0.12  |
| Brazil  | G1203     | 1              | 0.98 | 0.94 | 0.90 | 0.85 | 0.81 | 0.78 | 0.74 | 0.71 | 0.68 | 0.65  | 0.59  | 0.54  | 0.48  | 0.44  | 0.38  | 0.28  | 0.19  |
| Brazil  | G1204     | 1              | 1.00 | 0.99 | 0.97 | 0.93 | 0.89 | 0.85 | 0.82 | 0.79 | 0.76 | 0.74  | 0.71  | 0.68  | 0.65  | 0.63  | 0.61  | 0.55  | 0.50  |
| Brazil  | G1205     | 1              | 1.00 | 1.00 | 0.99 | 0.99 | 0.99 | 0.98 | 0.98 | 0.97 | 0.96 | 0.96  | 0.94  | 0.93  | 0.91  | 0.89  | 0.87  | 0.77  | 0.65  |
| Brazil  | G1206     | 1              | 0.97 | 0.94 | 0.91 | 0.89 | 0.87 | 0.85 | 0.82 | 0.80 | 0.78 | 0.75  | 0.70  | 0.65  | 0.61  | 0.55  | 0.49  | 0.35  | 0.23  |
| Brazil  | G1207     | 1              | 1.00 | 0.99 | 0.97 | 0.92 | 0.88 | 0.85 | 0.81 | 0.78 | 0.76 | 0.74  | 0.71  | 0.68  | 0.65  | 0.63  | 0.61  | 0.55  | 0.50  |
| Brazil  | G1208     | 1              | 0.99 | 0.96 | 0.92 | 0.86 | 0.81 | 0.76 | 0.71 | 0.67 | 0.63 | 0.60  | 0.53  | 0.47  | 0.43  | 0.39  | 0.35  | 0.28  | 0.23  |
| Brazil  | G1209     | 1              | 0.99 | 0.96 | 0.92 | 0.88 | 0.83 | 0.78 | 0.73 | 0.68 | 0.64 | 0.60  | 0.53  | 0.47  | 0.42  | 0.37  | 0.33  | 0.23  | 0.13  |
| Brazil  | G1210     | 1              | 0.98 | 0.94 | 0.89 | 0.86 | 0.80 | 0.74 | 0.71 | 0.66 | 0.61 | 0.58  | 0.49  | 0.41  | 0.35  | 0.33  | 0.30  | 0.26  | 0.24  |
| Brazil  | G1211     | 1              | 0.95 | 0.82 | 0.70 | 0.60 | 0.52 | 0.47 | 0.43 | 0.40 | 0.38 | 0.36  | 0.31  | 0.28  | 0.27  | 0.28  | 0.25  | 0.24  | 0.21  |
| Brazil  | G1212     | 1              | 1.00 | 1.00 | 1.00 | 0.99 | 0.99 | 0.99 | 0.98 | 0.98 | 0.97 | 0.96  | 0.94  | 0.91  | 0.88  | 0.85  | 0.81  | 0.73  | 0.64  |
| Brazil  | G1213     | 1              | 1.00 | 0.99 | 0.99 | 0.98 | 0.98 | 0.97 | 0.95 | 0.92 | 0.87 | 0.82  | 0.72  | 0.63  | 0.56  | 0.50  | 0.43  | 0.28  | 0.21  |
| Brazil  | G1214     | 1              | 1.00 | 0.99 | 0.99 | 0.98 | 0.97 | 0.95 | 0.94 | 0.92 | 0.90 | 0.89  | 0.85  | 0.79  | 0.70  | 0.60  | 0.51  | 0.37  | 0.31  |
| Brazil  | G1215     | 1              | 1.00 | 0.99 | 0.97 | 0.96 | 0.95 | 0.93 | 0.92 | 0.89 | 0.87 | 0.84  | 0.77  | 0.67  | 0.57  | 0.47  | 0.39  | 0.27  | 0.22  |
| Brazil  | G1217     | 1              | 1.00 | 0.99 | 0.99 | 0.98 | 0.98 | 0.97 | 0.97 | 0.96 | 0.95 | 0.94  | 0.93  | 0.91  | 0.90  | 0.87  | 0.85  | 0.76  | 0.66  |
| Brazil  | G1218     | 1              | 1.00 | 0.98 | 0.95 | 0.91 | 0.87 | 0.82 | 0.78 | 0.74 | 0.70 | 0.67  | 0.59  | 0.52  | 0.46  | 0.40  | 0.33  | 0.16  | 0.01  |
| Brazil  | G1219     | 1              | 1.00 | 0.97 | 0.86 | 0.69 | 0.51 | 0.35 | 0.23 | 0.13 | 0.05 | -0.01 | -0.07 | -0.10 | -0.10 | -0.09 | -0.08 | -0.06 | -0.04 |
| Brazil  | G1220     | 1              | 1.00 | 0.94 | 0.78 | 0.58 | 0.41 | 0.26 | 0.15 | 0.07 | 0.01 | -0.04 | -0.09 | -0.11 | -0.10 | -0.09 | -0.08 | -0.07 | -0.05 |
| Brazil  | G1221     | 1              | 0.99 | 0.96 | 0.92 | 0.86 | 0.82 | 0.77 | 0.73 | 0.68 | 0.65 | 0.61  | 0.55  | 0.50  | 0.46  | 0.42  | 0.38  | 0.30  | 0.22  |

| Country | GloFAS ID | Station filter | LT1  | LT2  | LT3  | LT4  | LT5  | LT6  | LT7  | LT8  | LT9  | LT10 | LT12 | LT14 | LT16 | LT18  | LT20  | LT25  | L30   |
|---------|-----------|----------------|------|------|------|------|------|------|------|------|------|------|------|------|------|-------|-------|-------|-------|
| Brazil  | G1222     | 1              | 1.00 | 0.98 | 0.96 | 0.92 | 0.88 | 0.84 | 0.79 | 0.74 | 0.68 | 0.62 | 0.48 | 0.37 | 0.30 | 0.25  | 0.21  | 0.16  | 0.11  |
| Brazil  | G1223     | 1              | 0.98 | 0.90 | 0.79 | 0.74 | 0.72 | 0.67 | 0.62 | 0.58 | 0.55 | 0.50 | 0.47 | 0.43 | 0.41 | 0.37  | 0.37  | 0.30  | 0.28  |
| Brazil  | G1224     | 1              | 1.00 | 0.98 | 0.92 | 0.84 | 0.78 | 0.74 | 0.68 | 0.62 | 0.59 | 0.55 | 0.48 | 0.43 | 0.38 | 0.35  | 0.32  | 0.28  | 0.24  |
| Brazil  | G1225     | 1              | 1.00 | 0.98 | 0.95 | 0.93 | 0.89 | 0.86 | 0.82 | 0.77 | 0.73 | 0.68 | 0.59 | 0.50 | 0.43 | 0.37  | 0.32  | 0.22  | 0.16  |
| Brazil  | G1226     | 1              | 1.00 | 0.98 | 0.96 | 0.92 | 0.86 | 0.84 | 0.81 | 0.77 | 0.71 | 0.68 | 0.60 | 0.56 | 0.50 | 0.48  | 0.44  | 0.37  | 0.33  |
| Brazil  | G1227     | 1              | 1.00 | 0.99 | 0.98 | 0.97 | 0.95 | 0.93 | 0.92 | 0.90 | 0.88 | 0.85 | 0.79 | 0.69 | 0.58 | 0.48  | 0.42  | 0.32  | 0.27  |
| Brazil  | G1228     | 1              | 0.99 | 0.95 | 0.90 | 0.86 | 0.83 | 0.80 | 0.77 | 0.75 | 0.74 | 0.72 | 0.69 | 0.66 | 0.64 | 0.62  | 0.59  | 0.54  | 0.48  |
| Brazil  | G1229     | 1              | 0.99 | 0.96 | 0.94 | 0.92 | 0.91 | 0.89 | 0.87 | 0.85 | 0.83 | 0.80 | 0.75 | 0.71 | 0.66 | 0.60  | 0.54  | 0.39  | 0.27  |
| Brazil  | G1230     | 1              | 0.98 | 0.86 | 0.64 | 0.48 | 0.35 | 0.28 | 0.23 | 0.19 | 0.16 | 0.13 | 0.11 | 0.10 | 0.07 | 0.06  | 0.05  | 0.05  | 0.04  |
| Brazil  | G1231     | 1              | 1.00 | 1.00 | 1.00 | 0.99 | 0.99 | 0.98 | 0.97 | 0.97 | 0.96 | 0.95 | 0.93 | 0.91 | 0.89 | 0.86  | 0.81  | 0.69  | 0.57  |
| Brazil  | G1232     | 1              | 0.99 | 0.98 | 0.94 | 0.89 | 0.84 | 0.78 | 0.71 | 0.65 | 0.59 | 0.53 | 0.43 | 0.35 | 0.30 | 0.26  | 0.25  | 0.21  | 0.16  |
| Brazil  | G1233     | 1              | 0.99 | 0.98 | 0.97 | 0.96 | 0.94 | 0.91 | 0.87 | 0.82 | 0.76 | 0.71 | 0.60 | 0.52 | 0.44 | 0.38  | 0.33  | 0.24  | 0.18  |
| Brazil  | G1234     | 1              | 0.96 | 0.92 | 0.89 | 0.86 | 0.83 | 0.80 | 0.76 | 0.73 | 0.70 | 0.67 | 0.62 | 0.57 | 0.53 | 0.48  | 0.44  | 0.32  | 0.22  |
| Brazil  | G1235     | 1              | 1.00 | 0.99 | 0.97 | 0.94 | 0.90 | 0.84 | 0.77 | 0.68 | 0.59 | 0.51 | 0.38 | 0.30 | 0.26 | 0.22  | 0.19  | 0.13  | 0.09  |
| Brazil  | G1236     | 1              | 0.97 | 0.93 | 0.88 | 0.83 | 0.77 | 0.72 | 0.66 | 0.61 | 0.56 | 0.51 | 0.43 | 0.36 | 0.31 | 0.26  | 0.23  | 0.16  | 0.11  |
| Brazil  | G1237     | 1              | 1.00 | 0.99 | 0.97 | 0.95 | 0.92 | 0.87 | 0.81 | 0.72 | 0.64 | 0.55 | 0.42 | 0.34 | 0.29 | 0.26  | 0.23  | 0.18  | 0.14  |
| Brazil  | G1238     | 1              | 0.99 | 0.98 | 0.97 | 0.96 | 0.96 | 0.95 | 0.94 | 0.93 | 0.92 | 0.90 | 0.86 | 0.80 | 0.74 | 0.68  | 0.60  | 0.44  | 0.31  |
| Brazil  | G1239     | 1              | 0.98 | 0.93 | 0.87 | 0.80 | 0.73 | 0.67 | 0.60 | 0.54 | 0.49 | 0.44 | 0.36 | 0.29 | 0.23 | 0.18  | 0.15  | 0.10  | 0.06  |
| Brazil  | G1240     | 1              | 0.99 | 0.96 | 0.88 | 0.78 | 0.66 | 0.56 | 0.46 | 0.38 | 0.31 | 0.26 | 0.17 | 0.11 | 0.06 | 0.05  | 0.05  | 0.05  | 0.03  |
| Brazil  | G1241     | 1              | 0.98 | 0.84 | 0.57 | 0.32 | 0.17 | 0.09 | 0.05 | 0.02 | 0.02 | 0.02 | 0.03 | 0.03 | 0.03 | 0.03  | 0.03  | 0.03  | 0.02  |
| Brazil  | G1242     | 1              | 1.00 | 1.00 | 0.99 | 0.97 | 0.95 | 0.93 | 0.91 | 0.89 | 0.87 | 0.86 | 0.82 | 0.79 | 0.75 | 0.72  | 0.68  | 0.58  | 0.48  |
| Brazil  | G1243     | 1              | 0.92 | 0.82 | 0.73 | 0.68 | 0.62 | 0.56 | 0.53 | 0.49 | 0.45 | 0.41 | 0.35 | 0.30 | 0.25 | 0.21  | 0.18  | 0.13  | 0.09  |
| Brazil  | G1244     | 1              | 0.99 | 0.96 | 0.91 | 0.85 | 0.79 | 0.73 | 0.68 | 0.63 | 0.58 | 0.54 | 0.47 | 0.41 | 0.36 | 0.32  | 0.29  | 0.23  | 0.17  |
| Brazil  | G1245     | 1              | 0.98 | 0.94 | 0.89 | 0.85 | 0.82 | 0.79 | 0.77 | 0.75 | 0.73 | 0.72 | 0.69 | 0.66 | 0.63 | 0.61  | 0.58  | 0.52  | 0.46  |
| Brazil  | G1246     | 1              | 1.00 | 0.98 | 0.95 | 0.89 | 0.79 | 0.66 | 0.53 | 0.44 | 0.37 | 0.32 | 0.26 | 0.22 | 0.20 | 0.18  | 0.16  | 0.11  | 0.09  |
| Brazil  | G1247     | 1              | 1.00 | 1.00 | 0.99 | 0.99 | 0.99 | 0.98 | 0.97 | 0.97 | 0.96 | 0.95 | 0.93 | 0.89 | 0.84 | 0.78  | 0.73  | 0.59  | 0.46  |
| Brazil  | G1248     | 1              | 1.00 | 0.99 | 0.99 | 0.98 | 0.97 | 0.95 | 0.93 | 0.90 | 0.87 | 0.84 | 0.77 | 0.71 | 0.65 | 0.60  | 0.55  | 0.45  | 0.38  |
| Brazil  | G1249     | 1              | 0.99 | 0.96 | 0.93 | 0.89 | 0.86 | 0.82 | 0.78 | 0.75 | 0.71 | 0.68 | 0.62 | 0.56 | 0.52 | 0.48  | 0.44  | 0.35  | 0.29  |
| Brazil  | G1250     | 1              | 0.98 | 0.94 | 0.90 | 0.87 | 0.84 | 0.80 | 0.77 | 0.73 | 0.70 | 0.67 | 0.61 | 0.56 | 0.52 | 0.48  | 0.43  | 0.32  | 0.22  |
| Brazil  | G1251     | 1              | 0.95 | 0.82 | 0.54 | 0.29 | 0.16 | 0.11 | 0.08 | 0.07 | 0.06 | 0.07 | 0.07 | 0.08 | 0.07 | 0.02  | -0.05 | -0.03 | 0.00  |
| Brazil  | G1252     | 1              | 0.99 | 0.94 | 0.83 | 0.71 | 0.60 | 0.52 | 0.47 | 0.43 | 0.39 | 0.36 | 0.32 | 0.29 | 0.27 | 0.24  | 0.21  | 0.14  | 0.10  |
| Brazil  | G1253     | 1              | 0.90 | 0.71 | 0.47 | 0.28 | 0.16 | 0.10 | 0.07 | 0.03 | 0.03 | 0.02 | 0.03 | 0.03 | 0.02 | 0.00  | -0.02 | -0.01 | -0.01 |
| Brazil  | G1254     | 1              | 0.93 | 0.81 | 0.59 | 0.38 | 0.26 | 0.21 | 0.17 | 0.15 | 0.14 | 0.13 | 0.12 | 0.11 | 0.10 | 0.07  | 0.03  | 0.04  | 0.05  |
| Brazil  | G1255     | 1              | 0.98 | 0.94 | 0.86 | 0.74 | 0.61 | 0.51 | 0.45 | 0.41 | 0.37 | 0.33 | 0.28 | 0.24 | 0.21 | 0.19  | 0.17  | 0.12  | 0.09  |
| Brazil  | G1256     | 1              | 1.00 | 0.98 | 0.95 | 0.91 | 0.87 | 0.83 | 0.80 | 0.77 | 0.75 | 0.73 | 0.69 | 0.65 | 0.62 | 0.59  | 0.57  | 0.53  | 0.49  |
| Brazil  | G1257     | 1              | 0.97 | 0.84 | 0.63 | 0.42 | 0.27 | 0.19 | 0.14 | 0.11 | 0.10 | 0.11 | 0.10 | 0.09 | 0.08 | 0.09  | 0.08  | 0.08  | 0.06  |
| Brazil  | G1258     | 1              | 0.93 | 0.75 | 0.51 | 0.31 | 0.18 | 0.12 | 0.07 | 0.04 | 0.03 | 0.02 | 0.02 | 0.01 | 0.01 | -0.02 | -0.04 | -0.04 | -0.05 |
| Brazil  | G1259     | 1              | 0.97 | 0.91 | 0.86 | 0.83 | 0.80 | 0.77 | 0.75 | 0.73 | 0.71 | 0.70 | 0.67 | 0.64 | 0.61 | 0.58  | 0.55  | 0.48  | 0.42  |
| Brazil  | G1260     | 1              | 1.00 | 0.98 | 0.95 | 0.91 | 0.88 | 0.84 | 0.81 | 0.78 | 0.75 | 0.71 | 0.66 | 0.61 | 0.57 | 0.52  | 0.48  | 0.37  | 0.27  |

| Country | GloFAS ID | Station filter | LT1  | LT2  | LT3  | LT4  | LT5  | LT6  | LT7  | LT8  | LT9  | LT10 | LT12 | LT14 | LT16 | LT18 | LT20 | LT25 | L30  |
|---------|-----------|----------------|------|------|------|------|------|------|------|------|------|------|------|------|------|------|------|------|------|
| Brazil  | G1261     | 1              | 1.00 | 1.00 | 0.99 | 0.99 | 0.98 | 0.98 | 0.97 | 0.96 | 0.95 | 0.93 | 0.88 | 0.81 | 0.75 | 0.69 | 0.63 | 0.49 | 0.37 |
| Brazil  | G1263     | 1              | 0.99 | 0.93 | 0.80 | 0.66 | 0.54 | 0.45 | 0.38 | 0.32 | 0.28 | 0.24 | 0.19 | 0.16 | 0.15 | 0.15 | 0.14 | 0.10 | 0.08 |
| Brazil  | G1266     | 1              | 1.00 | 0.99 | 0.96 | 0.92 | 0.87 | 0.83 | 0.80 | 0.76 | 0.73 | 0.70 | 0.66 | 0.63 | 0.60 | 0.57 | 0.54 | 0.51 | 0.48 |
| Brazil  | G1267     | 1              | 0.98 | 0.88 | 0.69 | 0.53 | 0.42 | 0.35 | 0.31 | 0.27 | 0.24 | 0.22 | 0.19 | 0.17 | 0.14 | 0.12 | 0.11 | 0.07 | 0.03 |
| Brazil  | G1268     | 1              | 1.00 | 0.99 | 0.96 | 0.92 | 0.87 | 0.82 | 0.79 | 0.76 | 0.72 | 0.69 | 0.65 | 0.62 | 0.59 | 0.55 | 0.53 | 0.50 | 0.47 |
| Brazil  | G1270     | 1              | 1.00 | 0.98 | 0.96 | 0.94 | 0.92 | 0.90 | 0.88 | 0.86 | 0.84 | 0.81 | 0.76 | 0.70 | 0.64 | 0.58 | 0.53 | 0.41 | 0.31 |
| Brazil  | G1272     | 1              | 0.99 | 0.98 | 0.96 | 0.93 | 0.89 | 0.85 | 0.82 | 0.78 | 0.75 | 0.72 | 0.66 | 0.61 | 0.57 | 0.53 | 0.49 | 0.40 | 0.33 |
| Brazil  | G1273     | 1              | 0.99 | 0.96 | 0.93 | 0.89 | 0.84 | 0.80 | 0.76 | 0.72 | 0.68 | 0.64 | 0.58 | 0.53 | 0.48 | 0.43 | 0.39 | 0.29 | 0.21 |
| Brazil  | G1274     | 1              | 1.00 | 0.99 | 0.97 | 0.94 | 0.90 | 0.86 | 0.82 | 0.78 | 0.75 | 0.72 | 0.66 | 0.61 | 0.57 | 0.53 | 0.50 | 0.43 | 0.37 |
| Brazil  | G1275     | 1              | 1.00 | 1.00 | 0.99 | 0.99 | 0.99 | 0.98 | 0.98 | 0.97 | 0.97 | 0.96 | 0.95 | 0.93 | 0.90 | 0.87 | 0.84 | 0.74 | 0.63 |
| Brazil  | G1276     | 1              | 0.99 | 0.96 | 0.87 | 0.77 | 0.67 | 0.60 | 0.54 | 0.49 | 0.46 | 0.43 | 0.38 | 0.34 | 0.31 | 0.29 | 0.26 | 0.20 | 0.15 |
| Brazil  | G1278     | 1              | 0.98 | 0.96 | 0.94 | 0.91 | 0.88 | 0.85 | 0.81 | 0.76 | 0.72 | 0.68 | 0.61 | 0.54 | 0.48 | 0.43 | 0.39 | 0.31 | 0.25 |
| Brazil  | G1280     | 1              | 0.99 | 0.89 | 0.85 | 0.84 | 0.83 | 0.74 | 0.73 | 0.74 | 0.70 | 0.67 | 0.66 | 0.58 | 0.55 | 0.52 | 0.49 | 0.44 | 0.39 |
| Brazil  | G1281     | 1              | 1.00 | 0.98 | 0.97 | 0.94 | 0.92 | 0.91 | 0.90 | 0.87 | 0.86 | 0.84 | 0.81 | 0.77 | 0.73 | 0.69 | 0.65 | 0.57 | 0.50 |
| Brazil  | G1282     | 1              | 0.99 | 0.97 | 0.96 | 0.94 | 0.91 | 0.89 | 0.88 | 0.86 | 0.84 | 0.83 | 0.80 | 0.77 | 0.73 | 0.71 | 0.69 | 0.65 | 0.60 |
| Brazil  | G1283     | 1              | 0.97 | 0.89 | 0.82 | 0.77 | 0.73 | 0.69 | 0.66 | 0.62 | 0.59 | 0.56 | 0.50 | 0.45 | 0.41 | 0.37 | 0.33 | 0.26 | 0.22 |
| Brazil  | G1284     | 1              | 0.99 | 0.95 | 0.90 | 0.86 | 0.81 | 0.78 | 0.75 | 0.72 | 0.70 | 0.68 | 0.64 | 0.61 | 0.58 | 0.54 | 0.51 | 0.43 | 0.37 |
| Brazil  | G1285     | 1              | 1.00 | 0.99 | 0.97 | 0.95 | 0.93 | 0.90 | 0.88 | 0.84 | 0.81 | 0.77 | 0.69 | 0.61 | 0.54 | 0.47 | 0.41 | 0.28 | 0.17 |
| Brazil  | G1286     | 1              | 1.00 | 1.00 | 1.00 | 0.99 | 0.99 | 0.99 | 0.99 | 0.98 | 0.97 | 0.97 | 0.94 | 0.92 | 0.88 | 0.85 | 0.81 | 0.74 | 0.66 |
| Brazil  | G1287     | 1              | 1.00 | 1.00 | 0.99 | 0.98 | 0.96 | 0.94 | 0.92 | 0.89 | 0.87 | 0.84 | 0.79 | 0.74 | 0.69 | 0.65 | 0.61 | 0.54 | 0.47 |
| Brazil  | G1288     | 1              | 0.99 | 0.98 | 0.96 | 0.94 | 0.91 | 0.88 | 0.84 | 0.79 | 0.74 | 0.69 | 0.60 | 0.53 | 0.48 | 0.42 | 0.38 | 0.28 | 0.21 |
| Brazil  | G1289     | 1              | 0.98 | 0.94 | 0.88 | 0.83 | 0.78 | 0.73 | 0.69 | 0.65 | 0.61 | 0.57 | 0.51 | 0.45 | 0.40 | 0.35 | 0.29 | 0.20 | 0.14 |
| Brazil  | G1290     | 1              | 0.98 | 0.91 | 0.85 | 0.79 | 0.73 | 0.67 | 0.63 | 0.59 | 0.54 | 0.50 | 0.43 | 0.36 | 0.31 | 0.27 | 0.22 | 0.15 | 0.10 |
| Brazil  | G1291     | 1              | 0.99 | 0.96 | 0.93 | 0.92 | 0.91 | 0.87 | 0.84 | 0.83 | 0.83 | 0.79 | 0.73 | 0.68 | 0.65 | 0.60 | 0.59 | 0.48 | 0.40 |
| Brazil  | G1292     | 1              | 1.00 | 0.98 | 0.95 | 0.91 | 0.87 | 0.83 | 0.78 | 0.73 | 0.69 | 0.64 | 0.56 | 0.49 | 0.42 | 0.37 | 0.32 | 0.20 | 0.12 |
| Brazil  | G1293     | 1              | 1.00 | 1.00 | 0.99 | 0.98 | 0.96 | 0.93 | 0.90 | 0.87 | 0.84 | 0.81 | 0.76 | 0.70 | 0.65 | 0.61 | 0.57 | 0.51 | 0.44 |
| Brazil  | G1295     | 1              | 0.99 | 0.96 | 0.90 | 0.83 | 0.77 | 0.72 | 0.68 | 0.64 | 0.61 | 0.59 | 0.54 | 0.51 | 0.47 | 0.44 | 0.41 | 0.36 | 0.32 |
| Brazil  | G1296     | 1              | 0.99 | 0.95 | 0.91 | 0.88 | 0.85 | 0.82 | 0.80 | 0.78 | 0.76 | 0.75 | 0.72 | 0.69 | 0.67 | 0.65 | 0.62 | 0.57 | 0.52 |
| Brazil  | G1297     | 1              | 1.00 | 0.99 | 0.96 | 0.90 | 0.82 | 0.72 | 0.64 | 0.57 | 0.51 | 0.47 | 0.41 | 0.38 | 0.37 | 0.36 | 0.36 | 0.33 | 0.29 |
| Brazil  | G1298     | 1              | 1.00 | 0.96 | 0.85 | 0.83 | 0.82 | 0.74 | 0.71 | 0.71 | 0.71 | 0.63 | 0.64 | 0.57 | 0.54 | 0.49 | 0.54 | 0.41 | 0.39 |
| Brazil  | G1300     | 1              | 1.00 | 1.00 | 0.99 | 0.98 | 0.97 | 0.96 | 0.95 | 0.94 | 0.92 | 0.91 | 0.87 | 0.82 | 0.77 | 0.73 | 0.68 | 0.58 | 0.50 |
| Brazil  | G1301     | 1              | 0.99 | 0.93 | 0.84 | 0.75 | 0.68 | 0.63 | 0.58 | 0.54 | 0.51 | 0.48 | 0.43 | 0.39 | 0.36 | 0.34 | 0.33 | 0.30 | 0.27 |
| Brazil  | G1302     | 1              | 1.00 | 1.00 | 0.99 | 0.99 | 0.98 | 0.97 | 0.96 | 0.94 | 0.93 | 0.91 | 0.88 | 0.84 | 0.80 | 0.75 | 0.70 | 0.56 | 0.42 |
| Brazil  | G1303     | 1              | 1.00 | 1.00 | 0.97 | 0.94 | 0.90 | 0.89 | 0.85 | 0.79 | 0.74 | 0.71 | 0.64 | 0.61 | 0.55 | 0.51 | 0.48 | 0.42 | 0.34 |
| Brazil  | G1305     | 1              | 0.99 | 0.97 | 0.93 | 0.85 | 0.74 | 0.63 | 0.54 | 0.46 | 0.39 | 0.35 | 0.28 | 0.23 | 0.19 | 0.15 | 0.13 | 0.11 | 0.10 |
| Brazil  | G1306     | 1              | 0.99 | 0.97 | 0.95 | 0.93 | 0.91 | 0.90 | 0.89 | 0.88 | 0.88 | 0.87 | 0.85 | 0.84 | 0.82 | 0.81 | 0.79 | 0.76 | 0.73 |
| Brazil  | G1309     | 1              | 1.00 | 0.99 | 0.98 | 0.97 | 0.96 | 0.94 | 0.92 | 0.90 | 0.88 | 0.85 | 0.78 | 0.71 | 0.63 | 0.55 | 0.47 | 0.31 | 0.16 |
| Brazil  | G1311     | 1              | 0.99 | 0.98 | 0.96 | 0.94 | 0.91 | 0.88 | 0.85 | 0.81 | 0.78 | 0.75 | 0.70 | 0.65 | 0.60 | 0.57 | 0.54 | 0.48 | 0.41 |
| Brazil  | G1313     | 1              | 0.99 | 0.99 | 0.98 | 0.97 | 0.96 | 0.95 | 0.94 | 0.92 | 0.90 | 0.88 | 0.83 | 0.80 | 0.76 | 0.72 | 0.69 | 0.60 | 0.54 |



| Country | GloFAS ID | Station filter | LT1  | LT2  | LT3  | LT4  | LT5  | LT6  | LT7  | LT8  | LT9   | LT10  | LT12  | LT14  | LT16  | LT18  | LT20  | LT25  | L30   |
|---------|-----------|----------------|------|------|------|------|------|------|------|------|-------|-------|-------|-------|-------|-------|-------|-------|-------|
| Brazil  | G1317     | 1              | 0.99 | 0.91 | 0.77 | 0.62 | 0.49 | 0.40 | 0.33 | 0.28 | 0.24  | 0.21  | 0.17  | 0.14  | 0.10  | 0.09  | 0.08  | 0.07  | 0.07  |
| Brazil  | G1318     | 1              | 0.99 | 0.96 | 0.91 | 0.85 | 0.79 | 0.74 | 0.70 | 0.67 | 0.64  | 0.61  | 0.57  | 0.53  | 0.49  | 0.47  | 0.46  | 0.40  | 0.36  |
| Brazil  | G1322     | 1              | 1.00 | 1.00 | 0.99 | 0.98 | 0.96 | 0.93 | 0.90 | 0.86 | 0.83  | 0.80  | 0.74  | 0.68  | 0.63  | 0.59  | 0.56  | 0.49  | 0.42  |
| Brazil  | G1324     | 1              | 1.00 | 0.98 | 0.95 | 0.89 | 0.84 | 0.77 | 0.72 | 0.67 | 0.64  | 0.62  | 0.58  | 0.54  | 0.51  | 0.49  | 0.46  | 0.38  | 0.33  |
| Brazil  | G1326     | 1              | 1.00 | 0.98 | 0.94 | 0.89 | 0.86 | 0.81 | 0.78 | 0.75 | 0.72  | 0.69  | 0.64  | 0.59  | 0.55  | 0.51  | 0.48  | 0.40  | 0.35  |
| Brazil  | G1327     | 1              | 0.98 | 0.95 | 0.92 | 0.90 | 0.87 | 0.84 | 0.83 | 0.81 | 0.78  | 0.76  | 0.74  | 0.72  | 0.69  | 0.68  | 0.66  | 0.64  | 0.61  |
| Brazil  | G1330     | 1              | 0.99 | 0.95 | 0.90 | 0.84 | 0.79 | 0.76 | 0.72 | 0.68 | 0.65  | 0.62  | 0.58  | 0.54  | 0.50  | 0.47  | 0.44  | 0.37  | 0.32  |
| Brazil  | G1332     | 1              | 0.98 | 0.95 | 0.91 | 0.87 | 0.83 | 0.79 | 0.76 | 0.72 | 0.70  | 0.67  | 0.62  | 0.57  | 0.53  | 0.49  | 0.45  | 0.38  | 0.34  |
| Brazil  | G1334     | 1              | 0.99 | 0.95 | 0.87 | 0.81 | 0.77 | 0.73 | 0.69 | 0.65 | 0.63  | 0.60  | 0.55  | 0.52  | 0.48  | 0.45  | 0.43  | 0.36  | 0.31  |
| Brazil  | G1335     | 1              | 1.00 | 0.99 | 0.98 | 0.97 | 0.95 | 0.93 | 0.91 | 0.89 | 0.86  | 0.84  | 0.80  | 0.76  | 0.72  | 0.69  | 0.65  | 0.57  | 0.51  |
| Brazil  | G1336     | 1              | 0.99 | 0.96 | 0.91 | 0.86 | 0.82 | 0.78 | 0.75 | 0.72 | 0.70  | 0.67  | 0.63  | 0.59  | 0.55  | 0.52  | 0.50  | 0.43  | 0.37  |
| Brazil  | G1341     | 1              | 0.96 | 0.87 | 0.82 | 0.77 | 0.72 | 0.69 | 0.67 | 0.63 | 0.61  | 0.60  | 0.55  | 0.52  | 0.47  | 0.46  | 0.41  | 0.37  | 0.33  |
| Brazil  | G1342     | 1              | 0.85 | 0.60 | 0.41 | 0.28 | 0.17 | 0.09 | 0.04 | 0.00 | -0.04 | -0.08 | -0.13 | -0.17 | -0.18 | -0.20 | -0.21 | -0.24 | -0.24 |
| Brazil  | G1345     | 1              | 0.99 | 0.96 | 0.91 | 0.87 | 0.82 | 0.77 | 0.74 | 0.71 | 0.68  | 0.65  | 0.59  | 0.54  | 0.50  | 0.45  | 0.41  | 0.35  | 0.30  |
| Brazil  | G1346     | 1              | 0.99 | 0.94 | 0.85 | 0.80 | 0.75 | 0.72 | 0.67 | 0.64 | 0.62  | 0.58  | 0.55  | 0.51  | 0.48  | 0.45  | 0.44  | 0.36  | 0.32  |
| Brazil  | G1348     | 1              | 1.00 | 0.99 | 0.98 | 0.96 | 0.94 | 0.91 | 0.88 | 0.86 | 0.84  | 0.82  | 0.77  | 0.73  | 0.69  | 0.66  | 0.62  | 0.56  | 0.50  |
| Brazil  | G1350     | 1              | 0.98 | 0.91 | 0.86 | 0.82 | 0.79 | 0.76 | 0.73 | 0.70 | 0.68  | 0.65  | 0.61  | 0.57  | 0.53  | 0.50  | 0.47  | 0.41  | 0.35  |
| Brazil  | G1354     | 1              | 0.97 | 0.91 | 0.87 | 0.83 | 0.79 | 0.76 | 0.73 | 0.70 | 0.68  | 0.65  | 0.61  | 0.57  | 0.54  | 0.50  | 0.46  | 0.39  | 0.31  |
| Brazil  | G1355     | 1              | 0.98 | 0.94 | 0.89 | 0.85 | 0.81 | 0.77 | 0.74 | 0.71 | 0.68  | 0.65  | 0.60  | 0.56  | 0.52  | 0.49  | 0.46  | 0.40  | 0.35  |
| Brazil  | G1357     | 1              | 0.99 | 0.97 | 0.94 | 0.92 | 0.89 | 0.86 | 0.82 | 0.80 | 0.77  | 0.73  | 0.67  | 0.63  | 0.59  | 0.55  | 0.51  | 0.45  | 0.39  |
| Brazil  | G1359     | 1              | 1.00 | 0.98 | 0.95 | 0.92 | 0.88 | 0.84 | 0.79 | 0.75 | 0.70  | 0.65  | 0.56  | 0.49  | 0.43  | 0.38  | 0.34  | 0.25  | 0.19  |
| Brazil  | G1362     | 1              | 0.99 | 0.97 | 0.95 | 0.93 | 0.89 | 0.86 | 0.83 | 0.80 | 0.77  | 0.73  | 0.68  | 0.63  | 0.60  | 0.56  | 0.51  | 0.45  | 0.40  |
| Brazil  | G1364     | 1              | 0.95 | 0.90 | 0.86 | 0.82 | 0.78 | 0.75 | 0.72 | 0.69 | 0.66  | 0.63  | 0.59  | 0.54  | 0.50  | 0.46  | 0.43  | 0.37  | 0.33  |
| Brazil  | G1366     | 1              | 0.93 | 0.76 | 0.40 | 0.23 | 0.16 | 0.15 | 0.16 | 0.16 | 0.17  | 0.19  | 0.18  | 0.18  | 0.17  | 0.17  | 0.17  | 0.14  | 0.12  |
| Brazil  | G1367     | 1              | 0.99 | 0.93 | 0.86 | 0.80 | 0.75 | 0.71 | 0.67 | 0.64 | 0.61  | 0.57  | 0.52  | 0.47  | 0.42  | 0.39  | 0.35  | 0.29  | 0.23  |
| Brazil  | G1368     | 1              | 0.96 | 0.89 | 0.83 | 0.79 | 0.75 | 0.71 | 0.69 | 0.66 | 0.62  | 0.61  | 0.58  | 0.53  | 0.48  | 0.46  | 0.44  | 0.40  | 0.34  |
| Brazil  | G1369     | 1              | 0.99 | 0.97 | 0.93 | 0.89 | 0.86 | 0.82 | 0.78 | 0.75 | 0.72  | 0.69  | 0.63  | 0.59  | 0.55  | 0.51  | 0.47  | 0.39  | 0.32  |
| Brazil  | G1370     | 1              | 0.80 | 0.73 | 0.69 | 0.65 | 0.61 | 0.59 | 0.56 | 0.52 | 0.51  | 0.49  | 0.45  | 0.40  | 0.38  | 0.36  | 0.35  | 0.33  | 0.29  |
| Brazil  | G1375     | 1              | 1.00 | 0.98 | 0.95 | 0.91 | 0.87 | 0.83 | 0.79 | 0.76 | 0.73  | 0.70  | 0.64  | 0.60  | 0.56  | 0.52  | 0.48  | 0.42  | 0.37  |
| Brazil  | G1376     | 1              | 0.90 | 0.81 | 0.65 | 0.54 | 0.49 | 0.48 | 0.47 | 0.44 | 0.44  | 0.43  | 0.39  | 0.36  | 0.32  | 0.30  | 0.29  | 0.25  | 0.22  |
| Brazil  | G1388     | 1              | 1.00 | 0.98 | 0.96 | 0.92 | 0.89 | 0.87 | 0.84 | 0.80 | 0.77  | 0.74  | 0.69  | 0.66  | 0.61  | 0.58  | 0.55  | 0.49  | 0.44  |
| Brazil  | G1393     | 1              | 1.00 | 0.98 | 0.96 | 0.93 | 0.91 | 0.88 | 0.86 | 0.83 | 0.81  | 0.78  | 0.73  | 0.69  | 0.64  | 0.59  | 0.56  | 0.48  | 0.44  |
| Brazil  | G1394     | 1              | 0.86 | 0.77 | 0.71 | 0.67 | 0.61 | 0.59 | 0.55 | 0.52 | 0.49  | 0.46  | 0.42  | 0.39  | 0.37  | 0.36  | 0.34  | 0.34  | 0.31  |
| Brazil  | G1395     | 1              | 0.98 | 0.94 | 0.90 | 0.84 | 0.78 | 0.73 | 0.69 | 0.65 | 0.62  | 0.60  | 0.55  | 0.51  | 0.45  | 0.42  | 0.39  | 0.33  | 0.28  |
| Brazil  | G1401     | 1              | 0.99 | 0.97 | 0.94 | 0.89 | 0.82 | 0.76 | 0.71 | 0.67 | 0.62  | 0.58  | 0.51  | 0.47  | 0.42  | 0.38  | 0.35  | 0.30  | 0.28  |
| Brazil  | G1409     | 1              | 1.00 | 0.99 | 0.97 | 0.95 | 0.93 | 0.90 | 0.86 | 0.82 | 0.78  | 0.75  | 0.68  | 0.62  | 0.57  | 0.54  | 0.51  | 0.45  | 0.42  |
| Brazil  | G1410     | 1              | 0.98 | 0.91 | 0.82 | 0.75 | 0.70 | 0.64 | 0.59 | 0.56 | 0.52  | 0.49  | 0.43  | 0.38  | 0.35  | 0.33  | 0.31  | 0.26  | 0.24  |
| Brazil  | G1412     | 1              | 0.99 | 0.96 | 0.89 | 0.83 | 0.77 | 0.72 | 0.66 | 0.61 | 0.58  | 0.54  | 0.48  | 0.43  | 0.38  | 0.36  | 0.33  | 0.29  | 0.26  |
| Brazil  | G1416     | 1              | 0.86 | 0.77 | 0.72 | 0.64 | 0.58 | 0.56 | 0.49 | 0.45 | 0.42  | 0.41  | 0.35  | 0.35  | 0.30  | 0.29  | 0.28  | 0.25  | 0.21  |

| Country | GloFAS ID | Station filter | LT1  | LT2  | LT3  | LT4  | LT5  | LT6  | LT7  | LT8  | LT9  | LT10 | LT12 | LT14 | LT16  | LT18  | LT20  | LT25  | L30   |
|---------|-----------|----------------|------|------|------|------|------|------|------|------|------|------|------|------|-------|-------|-------|-------|-------|
| Brazil  | G1423     | 1              | 0.99 | 0.97 | 0.94 | 0.91 | 0.87 | 0.84 | 0.80 | 0.76 | 0.73 | 0.69 | 0.64 | 0.58 | 0.54  | 0.49  | 0.45  | 0.38  | 0.33  |
| Brazil  | G1424     | 1              | 0.98 | 0.93 | 0.85 | 0.78 | 0.72 | 0.67 | 0.63 | 0.60 | 0.57 | 0.54 | 0.49 | 0.44 | 0.41  | 0.38  | 0.35  | 0.31  | 0.28  |
| Brazil  | G1425     | 1              | 0.99 | 0.98 | 0.95 | 0.90 | 0.86 | 0.82 | 0.78 | 0.74 | 0.70 | 0.67 | 0.62 | 0.57 | 0.52  | 0.47  | 0.42  | 0.36  | 0.31  |
| Brazil  | G1428     | 1              | 1.00 | 0.98 | 0.96 | 0.92 | 0.87 | 0.83 | 0.78 | 0.73 | 0.69 | 0.65 | 0.59 | 0.53 | 0.48  | 0.43  | 0.39  | 0.32  | 0.26  |
| Brazil  | G1430     | 1              | 0.98 | 0.93 | 0.85 | 0.76 | 0.71 | 0.67 | 0.62 | 0.58 | 0.55 | 0.52 | 0.44 | 0.39 | 0.36  | 0.31  | 0.29  | 0.25  | 0.21  |
| Brazil  | G1438     | 1              | 1.00 | 0.99 | 0.98 | 0.98 | 0.97 | 0.96 | 0.95 | 0.95 | 0.94 | 0.93 | 0.91 | 0.90 | 0.88  | 0.86  | 0.84  | 0.79  | 0.75  |
| Brazil  | G1439     | 1              | 0.99 | 0.94 | 0.92 | 0.90 | 0.88 | 0.86 | 0.85 | 0.84 | 0.82 | 0.81 | 0.78 | 0.75 | 0.72  | 0.69  | 0.67  | 0.61  | 0.56  |
| Brazil  | G1440     | 1              | 0.99 | 0.94 | 0.91 | 0.89 | 0.87 | 0.85 | 0.84 | 0.82 | 0.81 | 0.79 | 0.77 | 0.74 | 0.71  | 0.67  | 0.65  | 0.59  | 0.54  |
| Brazil  | G1442     | 1              | 0.99 | 0.96 | 0.86 | 0.77 | 0.70 | 0.64 | 0.61 | 0.59 | 0.57 | 0.55 | 0.51 | 0.49 | 0.46  | 0.42  | 0.38  | 0.32  | 0.28  |
| Brazil  | G1446     | 1              | 0.94 | 0.80 | 0.70 | 0.63 | 0.57 | 0.53 | 0.49 | 0.47 | 0.43 | 0.40 | 0.37 | 0.33 | 0.31  | 0.28  | 0.26  | 0.22  | 0.18  |
| Brazil  | G1449     | 1              | 0.97 | 0.85 | 0.76 | 0.70 | 0.65 | 0.62 | 0.59 | 0.56 | 0.53 | 0.50 | 0.46 | 0.41 | 0.37  | 0.33  | 0.30  | 0.25  | 0.22  |
| Brazil  | G1461     | 1              | 0.99 | 0.95 | 0.90 | 0.84 | 0.79 | 0.73 | 0.68 | 0.64 | 0.60 | 0.56 | 0.50 | 0.43 | 0.38  | 0.35  | 0.30  | 0.24  | 0.21  |
| Brazil  | G1710     | 1              | 1.00 | 0.99 | 0.98 | 0.98 | 0.97 | 0.96 | 0.95 | 0.93 | 0.91 | 0.89 | 0.85 | 0.82 | 0.78  | 0.75  | 0.71  | 0.63  | 0.56  |
| Brazil  | G1711     | 1              | 0.99 | 0.99 | 0.98 | 0.98 | 0.98 | 0.97 | 0.97 | 0.96 | 0.96 | 0.95 | 0.93 | 0.90 | 0.87  | 0.84  | 0.81  | 0.73  | 0.66  |
| Brazil  | G1758     | 1              | 1.00 | 1.00 | 0.99 | 0.98 | 0.95 | 0.92 | 0.87 | 0.81 | 0.75 | 0.69 | 0.55 | 0.42 | 0.30  | 0.20  | 0.10  | -0.10 | -0.29 |
| Brazil  | G1759     | 1              | 1.00 | 0.99 | 0.99 | 0.98 | 0.96 | 0.94 | 0.93 | 0.90 | 0.88 | 0.86 | 0.80 | 0.73 | 0.65  | 0.56  | 0.46  | 0.26  | 0.10  |
| Brazil  | G1760     | 1              | 1.00 | 1.00 | 0.99 | 0.99 | 0.99 | 0.98 | 0.98 | 0.97 | 0.96 | 0.96 | 0.94 | 0.92 | 0.90  | 0.87  | 0.84  | 0.76  | 0.67  |
| Brazil  | G1761     | 1              | 1.00 | 1.00 | 1.00 | 0.99 | 0.99 | 0.99 | 0.98 | 0.98 | 0.97 | 0.97 | 0.96 | 0.94 | 0.92  | 0.90  | 0.87  | 0.79  | 0.70  |
| Brazil  | G1762     | 1              | 1.00 | 1.00 | 1.00 | 0.99 | 0.99 | 0.99 | 0.98 | 0.98 | 0.97 | 0.97 | 0.95 | 0.93 | 0.90  | 0.88  | 0.85  | 0.78  | 0.68  |
| Brazil  | G1763     | 1              | 1.00 | 1.00 | 0.99 | 0.99 | 0.99 | 0.98 | 0.97 | 0.97 | 0.96 | 0.95 | 0.92 | 0.90 | 0.87  | 0.83  | 0.80  | 0.72  | 0.61  |
| Brazil  | G1845     | 1              | 1.00 | 1.00 | 0.99 | 0.97 | 0.92 | 0.86 | 0.81 | 0.76 | 0.71 | 0.67 | 0.60 | 0.54 | 0.49  | 0.44  | 0.38  | 0.29  | 0.24  |
| Brazil  | G1847     | 1              | 0.99 | 0.97 | 0.92 | 0.87 | 0.81 | 0.75 | 0.70 | 0.66 | 0.62 | 0.58 | 0.51 | 0.45 | 0.40  | 0.37  | 0.33  | 0.27  | 0.23  |
| Brazil  | G1848     | 1              | 1.00 | 0.98 | 0.94 | 0.88 | 0.82 | 0.77 | 0.71 | 0.67 | 0.63 | 0.59 | 0.52 | 0.45 | 0.40  | 0.36  | 0.33  | 0.27  | 0.23  |
| Brazil  | G1849     | 1              | 1.00 | 0.99 | 0.95 | 0.89 | 0.82 | 0.77 | 0.73 | 0.69 | 0.65 | 0.63 | 0.57 | 0.51 | 0.45  | 0.41  | 0.36  | 0.29  | 0.23  |
| Brazil  | G1850     | 1              | 0.99 | 0.96 | 0.88 | 0.82 | 0.76 | 0.72 | 0.68 | 0.65 | 0.62 | 0.59 | 0.54 | 0.48 | 0.45  | 0.41  | 0.37  | 0.32  | 0.28  |
| Brazil  | G1851     | 1              | 0.99 | 0.96 | 0.89 | 0.82 | 0.77 | 0.73 | 0.69 | 0.66 | 0.63 | 0.60 | 0.55 | 0.49 | 0.46  | 0.42  | 0.38  | 0.33  | 0.29  |
| Brazil  | G1856     | 1              | 0.99 | 0.95 | 0.92 | 0.87 | 0.81 | 0.75 | 0.71 | 0.67 | 0.64 | 0.61 | 0.56 | 0.52 | 0.47  | 0.43  | 0.40  | 0.33  | 0.29  |
| Brazil  | G1857     | 1              | 0.94 | 0.90 | 0.85 | 0.77 | 0.71 | 0.66 | 0.62 | 0.58 | 0.56 | 0.54 | 0.49 | 0.44 | 0.40  | 0.37  | 0.34  | 0.29  | 0.25  |
| Brazil  | G1858     | 1              | 0.98 | 0.94 | 0.89 | 0.82 | 0.75 | 0.69 | 0.65 | 0.63 | 0.60 | 0.58 | 0.53 | 0.48 | 0.43  | 0.39  | 0.36  | 0.29  | 0.24  |
| Brazil  | G1868     | 1              | 1.00 | 0.99 | 0.98 | 0.98 | 0.97 | 0.96 | 0.95 | 0.94 | 0.91 | 0.88 | 0.78 | 0.69 | 0.60  | 0.54  | 0.47  | 0.32  | 0.23  |
| Brazil  | G1873     | 1              | 1.00 | 1.00 | 0.99 | 0.99 | 0.99 | 0.98 | 0.97 | 0.96 | 0.95 | 0.94 | 0.93 | 0.91 | 0.88  | 0.85  | 0.80  | 0.68  | 0.55  |
| Brazil  | G1874     | 1              | 1.00 | 0.99 | 0.98 | 0.98 | 0.97 | 0.97 | 0.96 | 0.95 | 0.94 | 0.94 | 0.92 | 0.89 | 0.86  | 0.83  | 0.80  | 0.70  | 0.57  |
| Brazil  | G1877     | 1              | 1.00 | 1.00 | 0.99 | 0.99 | 0.98 | 0.98 | 0.97 | 0.96 | 0.95 | 0.94 | 0.91 | 0.87 | 0.81  | 0.74  | 0.65  | 0.43  | 0.28  |
| Brazil  | G1878     | 1              | 1.00 | 1.00 | 1.00 | 0.99 | 0.99 | 0.99 | 0.98 | 0.98 | 0.97 | 0.97 | 0.95 | 0.94 | 0.92  | 0.90  | 0.88  | 0.81  | 0.71  |
| Brazil  | G1879     | 1              | 1.00 | 0.99 | 0.98 | 0.97 | 0.95 | 0.93 | 0.91 | 0.89 | 0.87 | 0.85 | 0.82 | 0.78 | 0.75  | 0.71  | 0.68  | 0.58  | 0.48  |
| Brazil  | G5167     | 1              | 0.92 | 0.79 | 0.66 | 0.55 | 0.47 | 0.39 | 0.33 | 0.27 | 0.22 | 0.17 | 0.10 | 0.03 | -0.02 | -0.07 | -0.12 | -0.22 | -0.29 |
| Brazil  | G5175     | 1              | 0.97 | 0.88 | 0.78 | 0.66 | 0.56 | 0.49 | 0.43 | 0.35 | 0.30 | 0.26 | 0.17 | 0.11 | 0.05  | 0.00  | -0.05 | -0.17 | -0.25 |
| Brazil  | G5176     | 1              | 0.98 | 0.93 | 0.85 | 0.75 | 0.66 | 0.57 | 0.49 | 0.41 | 0.34 | 0.28 | 0.18 | 0.10 | 0.03  | -0.03 | -0.08 | -0.26 | -0.35 |
| Brazil  | G5209     | 1              | 1.00 | 0.99 | 0.97 | 0.93 | 0.87 | 0.80 | 0.73 | 0.64 | 0.56 | 0.49 | 0.35 | 0.23 | 0.14  | 0.06  | -0.01 | -0.19 | -0.33 |

| Country | GloFAS ID | Station filter | LT1  | LT2  | LT3  | LT4  | LT5  | LT6  | LT7  | LT8  | LT9  | LT10 | LT12  | LT14  | LT16  | LT18  | LT20  | LT25  | L30   |
|---------|-----------|----------------|------|------|------|------|------|------|------|------|------|------|-------|-------|-------|-------|-------|-------|-------|
| Brazil  | G5211     | 1              | 0.99 | 0.95 | 0.88 | 0.80 | 0.73 | 0.66 | 0.59 | 0.52 | 0.47 | 0.42 | 0.33  | 0.25  | 0.17  | 0.08  | -0.01 | -0.21 | -0.33 |
| Brazil  | G5235     | 1              | 1.00 | 0.99 | 0.97 | 0.96 | 0.93 | 0.90 | 0.87 | 0.82 | 0.77 | 0.72 | 0.62  | 0.54  | 0.47  | 0.39  | 0.34  | 0.21  | 0.10  |
| Brazil  | G5250     | 1              | 0.99 | 0.97 | 0.92 | 0.86 | 0.79 | 0.72 | 0.65 | 0.59 | 0.53 | 0.47 | 0.38  | 0.30  | 0.23  | 0.17  | 0.11  | -0.01 | -0.11 |
| Brazil  | G5257     | 1              | 1.00 | 0.99 | 0.98 | 0.97 | 0.96 | 0.93 | 0.91 | 0.88 | 0.84 | 0.80 | 0.70  | 0.58  | 0.46  | 0.36  | 0.27  | 0.12  | 0.00  |
| Brazil  | G5258     | 1              | 1.00 | 0.99 | 0.99 | 0.98 | 0.97 | 0.96 | 0.94 | 0.92 | 0.90 | 0.88 | 0.83  | 0.77  | 0.69  | 0.61  | 0.51  | 0.30  | 0.14  |
| Brazil  | G5262     | 1              | 1.00 | 0.98 | 0.96 | 0.93 | 0.89 | 0.86 | 0.82 | 0.78 | 0.73 | 0.69 | 0.60  | 0.51  | 0.43  | 0.36  | 0.30  | 0.17  | 0.07  |
| Brazil  | G5266     | 1              | 0.99 | 0.98 | 0.97 | 0.94 | 0.90 | 0.85 | 0.80 | 0.74 | 0.69 | 0.64 | 0.54  | 0.46  | 0.38  | 0.31  | 0.24  | 0.08  | -0.04 |
| Brazil  | G5271     | 1              | 0.95 | 0.86 | 0.71 | 0.56 | 0.43 | 0.34 | 0.27 | 0.21 | 0.17 | 0.15 | 0.11  | 0.08  | 0.06  | 0.04  | 0.03  | -0.04 | -0.10 |
| Brazil  | G5274     | 1              | 1.00 | 1.00 | 0.99 | 0.99 | 0.98 | 0.98 | 0.97 | 0.95 | 0.94 | 0.92 | 0.89  | 0.84  | 0.79  | 0.74  | 0.67  | 0.47  | 0.27  |
| Brazil  | G5275     | 1              | 1.00 | 0.99 | 0.98 | 0.97 | 0.95 | 0.93 | 0.91 | 0.87 | 0.82 | 0.77 | 0.65  | 0.52  | 0.41  | 0.32  | 0.24  | 0.07  | -0.07 |
| Brazil  | G5289     | 1              | 1.00 | 0.99 | 0.99 | 0.98 | 0.97 | 0.95 | 0.93 | 0.90 | 0.86 | 0.81 | 0.70  | 0.57  | 0.45  | 0.34  | 0.23  | 0.01  | -0.19 |
| Brazil  | G5290     | 1              | 0.99 | 0.96 | 0.87 | 0.73 | 0.62 | 0.53 | 0.45 | 0.40 | 0.36 | 0.33 | 0.28  | 0.23  | 0.20  | 0.18  | 0.14  | 0.08  | 0.05  |
| Brazil  | G5292     | 1              | 1.00 | 1.00 | 1.00 | 0.99 | 0.99 | 0.98 | 0.98 | 0.97 | 0.96 | 0.95 | 0.92  | 0.88  | 0.83  | 0.78  | 0.72  | 0.57  | 0.39  |
| Brazil  | G5293     | 1              | 1.00 | 0.99 | 0.97 | 0.95 | 0.92 | 0.89 | 0.86 | 0.83 | 0.80 | 0.77 | 0.70  | 0.63  | 0.57  | 0.50  | 0.44  | 0.29  | 0.15  |
| Brazil  | G5294     | 1              | 0.99 | 0.97 | 0.93 | 0.88 | 0.83 | 0.78 | 0.72 | 0.67 | 0.62 | 0.58 | 0.49  | 0.42  | 0.35  | 0.29  | 0.23  | 0.10  | 0.01  |
| Brazil  | G5295     | 1              | 1.00 | 1.00 | 0.99 | 0.99 | 0.98 | 0.98 | 0.97 | 0.97 | 0.96 | 0.95 | 0.93  | 0.90  | 0.87  | 0.84  | 0.80  | 0.71  | 0.61  |
| Brazil  | G5296     | 1              | 1.00 | 1.00 | 0.99 | 0.98 | 0.98 | 0.97 | 0.97 | 0.96 | 0.95 | 0.94 | 0.92  | 0.89  | 0.86  | 0.83  | 0.79  | 0.70  | 0.60  |
| Brazil  | G5301     | 1              | 1.00 | 1.00 | 0.99 | 0.99 | 0.98 | 0.98 | 0.97 | 0.97 | 0.96 | 0.95 | 0.93  | 0.90  | 0.87  | 0.84  | 0.81  | 0.72  | 0.62  |
| Brazil  | G5302     | 1              | 1.00 | 0.99 | 0.99 | 0.98 | 0.97 | 0.95 | 0.94 | 0.92 | 0.90 | 0.89 | 0.85  | 0.80  | 0.76  | 0.71  | 0.67  | 0.55  | 0.44  |
| Brazil  | G5310     | 1              | 1.00 | 1.00 | 0.99 | 0.99 | 0.99 | 0.98 | 0.97 | 0.96 | 0.94 | 0.92 | 0.85  | 0.76  | 0.66  | 0.56  | 0.46  | 0.27  | 0.17  |
| Brazil  | G5311     | 1              | 0.99 | 0.97 | 0.95 | 0.93 | 0.91 | 0.88 | 0.85 | 0.83 | 0.79 | 0.76 | 0.70  | 0.64  | 0.59  | 0.55  | 0.50  | 0.41  | 0.33  |
| Brazil  | G5312     | 1              | 1.00 | 1.00 | 0.99 | 0.96 | 0.93 | 0.87 | 0.81 | 0.74 | 0.67 | 0.60 | 0.47  | 0.36  | 0.28  | 0.20  | 0.12  | -0.06 | -0.20 |
| Brazil  | G5313     | 1              | 0.97 | 0.92 | 0.86 | 0.79 | 0.72 | 0.65 | 0.60 | 0.55 | 0.51 | 0.47 | 0.39  | 0.33  | 0.28  | 0.22  | 0.17  | 0.07  | 0.00  |
| Brazil  | G5314     | 1              | 0.97 | 0.89 | 0.78 | 0.69 | 0.62 | 0.57 | 0.53 | 0.49 | 0.46 | 0.43 | 0.38  | 0.35  | 0.31  | 0.28  | 0.23  | 0.19  | 0.15  |
| Brazil  | G5318     | 1              | 1.00 | 1.00 | 1.00 | 0.99 | 0.99 | 0.98 | 0.97 | 0.95 | 0.93 | 0.91 | 0.86  | 0.80  | 0.73  | 0.66  | 0.58  | 0.40  | 0.21  |
| Brazil  | G5319     | 1              | 1.00 | 0.99 | 0.98 | 0.98 | 0.96 | 0.95 | 0.92 | 0.89 | 0.85 | 0.80 | 0.70  | 0.59  | 0.49  | 0.40  | 0.31  | 0.11  | -0.06 |
| Brazil  | G5320     | 1              | 0.96 | 0.87 | 0.78 | 0.69 | 0.60 | 0.52 | 0.46 | 0.41 | 0.36 | 0.31 | 0.25  | 0.20  | 0.15  | 0.11  | 0.06  | -0.02 | -0.09 |
| Brazil  | G5321     | 1              | 0.98 | 0.92 | 0.84 | 0.74 | 0.65 | 0.56 | 0.49 | 0.42 | 0.37 | 0.32 | 0.25  | 0.20  | 0.16  | 0.12  | 0.09  | 0.00  | -0.06 |
| Brazil  | G5323     | 1              | 0.99 | 0.98 | 0.95 | 0.91 | 0.86 | 0.81 | 0.77 | 0.72 | 0.68 | 0.64 | 0.56  | 0.49  | 0.42  | 0.35  | 0.30  | 0.17  | 0.07  |
| Brazil  | G5324     | 1              | 0.99 | 0.97 | 0.94 | 0.91 | 0.87 | 0.82 | 0.77 | 0.72 | 0.68 | 0.63 | 0.53  | 0.44  | 0.36  | 0.28  | 0.21  | 0.05  | -0.07 |
| Brazil  | G5325     | 1              | 0.99 | 0.98 | 0.97 | 0.96 | 0.95 | 0.93 | 0.91 | 0.90 | 0.88 | 0.85 | 0.81  | 0.76  | 0.72  | 0.68  | 0.63  | 0.51  | 0.40  |
| Brazil  | G5329     | 1              | 1.00 | 1.00 | 1.00 | 0.99 | 0.99 | 0.98 | 0.97 | 0.96 | 0.94 | 0.92 | 0.87  | 0.81  | 0.75  | 0.68  | 0.60  | 0.42  | 0.23  |
| Brazil  | G5330     | 1              | 0.98 | 0.94 | 0.87 | 0.79 | 0.72 | 0.64 | 0.58 | 0.51 | 0.46 | 0.41 | 0.32  | 0.25  | 0.20  | 0.16  | 0.10  | -0.01 | -0.08 |
| Brazil  | G5337     | 1              | 1.00 | 0.99 | 0.98 | 0.96 | 0.95 | 0.93 | 0.92 | 0.90 | 0.88 | 0.86 | 0.81  | 0.76  | 0.70  | 0.63  | 0.55  | 0.36  | 0.18  |
| Brazil  | G5338     | 1              | 0.99 | 0.93 | 0.78 | 0.59 | 0.42 | 0.29 | 0.18 | 0.10 | 0.04 | 0.00 | -0.03 | -0.05 | -0.06 | -0.08 | -0.09 | -0.14 | -0.18 |
| Brazil  | G5339     | 1              | 0.98 | 0.94 | 0.83 | 0.72 | 0.62 | 0.52 | 0.44 | 0.37 | 0.31 | 0.25 | 0.17  | 0.09  | 0.04  | -0.03 | -0.09 | -0.25 | -0.35 |
| Brazil  | G5340     | 1              | 1.00 | 1.00 | 1.00 | 0.99 | 0.99 | 0.99 | 0.98 | 0.98 | 0.97 | 0.97 | 0.95  | 0.93  | 0.90  | 0.88  | 0.85  | 0.78  | 0.68  |
| Brazil  | G5341     | 1              | 0.98 | 0.96 | 0.93 | 0.88 | 0.82 | 0.76 | 0.70 | 0.63 | 0.57 | 0.51 | 0.40  | 0.30  | 0.21  | 0.12  | 0.04  | -0.12 | -0.22 |
| Brazil  | G5343     | 1              | 1.00 | 1.00 | 0.99 | 0.99 | 0.98 | 0.97 | 0.94 | 0.91 | 0.87 | 0.83 | 0.76  | 0.71  | 0.66  | 0.62  | 0.58  | 0.48  | 0.37  |

| Country | GloFAS ID | Station filter | LT1  | LT2  | LT3  | LT4  | LT5  | LT6  | LT7  | LT8   | LT9   | LT10  | LT12  | LT14  | LT16  | LT18  | LT20  | LT25  | L30   |
|---------|-----------|----------------|------|------|------|------|------|------|------|-------|-------|-------|-------|-------|-------|-------|-------|-------|-------|
| Brazil  | G5344     | 1              | 1.00 | 0.99 | 0.99 | 0.97 | 0.94 | 0.91 | 0.88 | 0.84  | 0.81  | 0.78  | 0.71  | 0.64  | 0.58  | 0.52  | 0.46  | 0.30  | 0.14  |
| Brazil  | G5345     | 1              | 1.00 | 1.00 | 1.00 | 0.99 | 0.99 | 0.98 | 0.98 | 0.97  | 0.96  | 0.95  | 0.93  | 0.90  | 0.88  | 0.85  | 0.82  | 0.74  | 0.63  |
| Brazil  | G5346     | 1              | 0.97 | 0.92 | 0.86 | 0.79 | 0.72 | 0.65 | 0.59 | 0.53  | 0.47  | 0.42  | 0.34  | 0.27  | 0.21  | 0.16  | 0.11  | 0.01  | -0.07 |
| Brazil  | G5348     | 1              | 1.00 | 1.00 | 1.00 | 0.99 | 0.99 | 0.99 | 0.98 | 0.98  | 0.97  | 0.96  | 0.95  | 0.93  | 0.91  | 0.88  | 0.86  | 0.78  | 0.69  |
| Brazil  | G5349     | 1              | 1.00 | 1.00 | 1.00 | 1.00 | 0.99 | 0.99 | 0.99 | 0.98  | 0.98  | 0.98  | 0.97  | 0.95  | 0.94  | 0.92  | 0.90  | 0.82  | 0.73  |
| Brazil  | G5350     | 1              | 1.00 | 1.00 | 1.00 | 1.00 | 0.99 | 0.99 | 0.99 | 0.99  | 0.98  | 0.98  | 0.97  | 0.96  | 0.94  | 0.93  | 0.91  | 0.84  | 0.75  |
| Brazil  | G5351     | 1              | 1.00 | 0.99 | 0.97 | 0.94 | 0.91 | 0.87 | 0.84 | 0.81  | 0.77  | 0.74  | 0.68  | 0.62  | 0.56  | 0.51  | 0.45  | 0.29  | 0.16  |
| Brazil  | G5352     | 1              | 1.00 | 1.00 | 1.00 | 0.99 | 0.99 | 0.99 | 0.98 | 0.98  | 0.97  | 0.96  | 0.95  | 0.93  | 0.91  | 0.89  | 0.86  | 0.78  | 0.69  |
| Brazil  | G5353     | 1              | 1.00 | 0.99 | 0.97 | 0.96 | 0.95 | 0.93 | 0.92 | 0.89  | 0.87  | 0.84  | 0.78  | 0.72  | 0.64  | 0.58  | 0.51  | 0.33  | 0.15  |
| Brazil  | G5354     | 1              | 0.98 | 0.94 | 0.87 | 0.78 | 0.70 | 0.61 | 0.54 | 0.47  | 0.42  | 0.37  | 0.28  | 0.22  | 0.16  | 0.11  | 0.08  | 0.01  | -0.06 |
| Brazil  | G5355     | 1              | 0.99 | 0.97 | 0.94 | 0.89 | 0.84 | 0.78 | 0.72 | 0.66  | 0.60  | 0.55  | 0.48  | 0.43  | 0.39  | 0.37  | 0.34  | 0.27  | 0.21  |
| Brazil  | G5356     | 1              | 1.00 | 0.99 | 0.99 | 0.98 | 0.98 | 0.97 | 0.96 | 0.96  | 0.95  | 0.94  | 0.93  | 0.92  | 0.90  | 0.88  | 0.86  | 0.78  | 0.63  |
| Brazil  | G5357     | 1              | 1.00 | 0.99 | 0.98 | 0.97 | 0.96 | 0.95 | 0.92 | 0.90  | 0.87  | 0.84  | 0.77  | 0.70  | 0.62  | 0.54  | 0.46  | 0.29  | 0.12  |
| Brazil  | G5358     | 1              | 0.97 | 0.90 | 0.83 | 0.77 | 0.70 | 0.63 | 0.57 | 0.52  | 0.46  | 0.42  | 0.34  | 0.27  | 0.21  | 0.15  | 0.10  | -0.01 | -0.11 |
| Brazil  | G5361     | 1              | 1.00 | 1.00 | 1.00 | 0.99 | 0.99 | 0.99 | 0.98 | 0.98  | 0.98  | 0.97  | 0.96  | 0.95  | 0.93  | 0.91  | 0.88  | 0.80  | 0.72  |
| Brazil  | G5375     | 1              | 1.00 | 1.00 | 1.00 | 0.99 | 0.99 | 0.99 | 0.98 | 0.98  | 0.97  | 0.97  | 0.96  | 0.94  | 0.92  | 0.90  | 0.88  | 0.82  | 0.73  |
| Brazil  | G5376     | 1              | 0.99 | 0.96 | 0.89 | 0.79 | 0.70 | 0.63 | 0.57 | 0.52  | 0.49  | 0.46  | 0.42  | 0.37  | 0.36  | 0.33  | 0.30  | 0.27  | 0.26  |
| Brazil  | G5379     | 1              | 1.00 | 1.00 | 1.00 | 0.99 | 0.99 | 0.99 | 0.98 | 0.98  | 0.97  | 0.97  | 0.96  | 0.94  | 0.92  | 0.90  | 0.88  | 0.79  | 0.66  |
| Brazil  | G5380     | 1              | 1.00 | 0.99 | 0.98 | 0.97 | 0.95 | 0.92 | 0.89 | 0.85  | 0.81  | 0.77  | 0.70  | 0.62  | 0.55  | 0.48  | 0.41  | 0.21  | 0.02  |
| Brazil  | G5384     | 1              | 1.00 | 1.00 | 1.00 | 0.99 | 0.99 | 0.99 | 0.98 | 0.98  | 0.97  | 0.97  | 0.95  | 0.94  | 0.92  | 0.90  | 0.88  | 0.82  | 0.74  |
| Brazil  | G5385     | 1              | 0.99 | 0.98 | 0.96 | 0.94 | 0.92 | 0.89 | 0.85 | 0.82  | 0.78  | 0.74  | 0.68  | 0.61  | 0.54  | 0.46  | 0.38  | 0.16  | -0.02 |
| Brazil  | G5390     | 1              | 0.99 | 0.97 | 0.94 | 0.91 | 0.87 | 0.84 | 0.80 | 0.77  | 0.73  | 0.70  | 0.64  | 0.58  | 0.52  | 0.47  | 0.42  | 0.32  | 0.23  |
| Brazil  | G5391     | 1              | 1.00 | 0.99 | 0.98 | 0.97 | 0.96 | 0.95 | 0.94 | 0.92  | 0.90  | 0.89  | 0.85  | 0.81  | 0.76  | 0.71  | 0.66  | 0.54  | 0.43  |
| Brazil  | G5392     | 1              | 0.88 | 0.75 | 0.62 | 0.45 | 0.27 | 0.13 | 0.02 | -0.07 | -0.16 | -0.21 | -0.28 | -0.31 | -0.33 | -0.31 | -0.32 | -0.24 | -0.17 |
| Brazil  | G5396     | 1              | 1.00 | 1.00 | 1.00 | 1.00 | 0.99 | 0.99 | 0.99 | 0.98  | 0.98  | 0.97  | 0.96  | 0.95  | 0.94  | 0.92  | 0.90  | 0.85  | 0.79  |
| Brazil  | G5397     | 1              | 1.00 | 1.00 | 1.00 | 0.99 | 0.99 | 0.99 | 0.98 | 0.98  | 0.98  | 0.97  | 0.96  | 0.95  | 0.94  | 0.92  | 0.90  | 0.86  | 0.80  |
| Brazil  | G5398     | 1              | 1.00 | 0.99 | 0.99 | 0.99 | 0.98 | 0.98 | 0.97 | 0.96  | 0.95  | 0.95  | 0.92  | 0.90  | 0.87  | 0.83  | 0.80  | 0.70  | 0.55  |
| Brazil  | G5399     | 1              | 0.98 | 0.93 | 0.88 | 0.82 | 0.74 | 0.66 | 0.59 | 0.51  | 0.44  | 0.38  | 0.29  | 0.22  | 0.16  | 0.13  | 0.10  | 0.05  | 0.03  |
| Brazil  | G5400     | 1              | 0.99 | 0.94 | 0.89 | 0.82 | 0.76 | 0.69 | 0.63 | 0.58  | 0.54  | 0.50  | 0.44  | 0.40  | 0.37  | 0.35  | 0.33  | 0.26  | 0.21  |
| Brazil  | G5402     | 1              | 1.00 | 0.99 | 0.99 | 0.97 | 0.95 | 0.93 | 0.90 | 0.87  | 0.84  | 0.81  | 0.75  | 0.69  | 0.62  | 0.55  | 0.49  | 0.34  | 0.22  |
| Brazil  | G5404     | 1              | 0.98 | 0.95 | 0.90 | 0.83 | 0.74 | 0.65 | 0.56 | 0.48  | 0.43  | 0.39  | 0.33  | 0.31  | 0.28  | 0.26  | 0.24  | 0.19  | 0.13  |
| Brazil  | G5406     | 1              | 1.00 | 0.99 | 0.98 | 0.98 | 0.97 | 0.95 | 0.94 | 0.93  | 0.92  | 0.91  | 0.88  | 0.85  | 0.81  | 0.78  | 0.74  | 0.65  | 0.55  |
| Brazil  | G5413     | 1              | 0.99 | 0.97 | 0.94 | 0.90 | 0.86 | 0.81 | 0.77 | 0.73  | 0.68  | 0.64  | 0.57  | 0.51  | 0.47  | 0.42  | 0.38  | 0.30  | 0.23  |
| Brazil  | G5425     | 1              | 1.00 | 0.99 | 0.99 | 0.97 | 0.95 | 0.93 | 0.90 | 0.87  | 0.84  | 0.80  | 0.71  | 0.62  | 0.53  | 0.46  | 0.41  | 0.31  | 0.24  |
| Brazil  | G5430     | 1              | 0.95 | 0.86 | 0.77 | 0.69 | 0.60 | 0.52 | 0.45 | 0.40  | 0.35  | 0.32  | 0.27  | 0.24  | 0.23  | 0.21  | 0.20  | 0.16  | 0.12  |
| Brazil  | G5434     | 1              | 0.98 | 0.94 | 0.89 | 0.84 | 0.79 | 0.74 | 0.69 | 0.65  | 0.61  | 0.58  | 0.54  | 0.50  | 0.47  | 0.44  | 0.41  | 0.35  | 0.29  |
| Brazil  | G5435     | 1              | 0.95 | 0.91 | 0.87 | 0.83 | 0.81 | 0.77 | 0.74 | 0.72  | 0.69  | 0.66  | 0.60  | 0.55  | 0.49  | 0.43  | 0.37  | 0.23  | 0.11  |
| Brazil  | G5439     | 1              | 0.88 | 0.74 | 0.64 | 0.57 | 0.50 | 0.43 | 0.38 | 0.33  | 0.28  | 0.23  | 0.17  | 0.13  | 0.09  | 0.05  | 0.02  | -0.03 | -0.06 |
| Brazil  | G5453     | 1              | 0.99 | 0.98 | 0.96 | 0.93 | 0.88 | 0.85 | 0.81 | 0.78  | 0.75  | 0.73  | 0.69  | 0.67  | 0.64  | 0.62  | 0.60  | 0.54  | 0.50  |

| Country | GloFAS ID | Station filter | LT1  | LT2  | LT3  | LT4  | LT5  | LT6  | LT7  | LT8  | LT9   | LT10  | LT12  | LT14  | LT16  | LT18  | LT20  | LT25  | L30   |
|---------|-----------|----------------|------|------|------|------|------|------|------|------|-------|-------|-------|-------|-------|-------|-------|-------|-------|
| Brazil  | G5454     | 1              | 0.99 | 0.98 | 0.96 | 0.93 | 0.90 | 0.86 | 0.82 | 0.77 | 0.73  | 0.69  | 0.62  | 0.57  | 0.52  | 0.49  | 0.46  | 0.38  | 0.32  |
| Brazil  | G5458     | 1              | 1.00 | 1.00 | 0.99 | 0.99 | 0.98 | 0.98 | 0.97 | 0.97 | 0.96  | 0.96  | 0.94  | 0.93  | 0.91  | 0.90  | 0.88  | 0.80  | 0.69  |
| Brazil  | G5459     | 1              | 1.00 | 0.99 | 0.98 | 0.97 | 0.96 | 0.95 | 0.93 | 0.91 | 0.89  | 0.87  | 0.83  | 0.77  | 0.69  | 0.61  | 0.53  | 0.35  | 0.23  |
| Brazil  | G5460     | 1              | 0.98 | 0.95 | 0.91 | 0.86 | 0.81 | 0.75 | 0.70 | 0.65 | 0.60  | 0.55  | 0.48  | 0.41  | 0.34  | 0.27  | 0.21  | 0.09  | 0.02  |
| Brazil  | G5462     | 1              | 0.99 | 0.96 | 0.92 | 0.88 | 0.85 | 0.82 | 0.79 | 0.75 | 0.68  | 0.60  | 0.43  | 0.27  | 0.16  | 0.07  | 0.00  | -0.09 | -0.12 |
| Brazil  | G5463     | 1              | 1.00 | 0.99 | 0.99 | 0.98 | 0.98 | 0.97 | 0.97 | 0.96 | 0.96  | 0.95  | 0.94  | 0.92  | 0.90  | 0.87  | 0.84  | 0.76  | 0.68  |
| Brazil  | G5464     | 1              | 0.99 | 0.97 | 0.95 | 0.92 | 0.89 | 0.86 | 0.82 | 0.78 | 0.74  | 0.70  | 0.62  | 0.54  | 0.47  | 0.40  | 0.34  | 0.21  | 0.12  |
| Brazil  | G5468     | 1              | 0.89 | 0.69 | 0.60 | 0.57 | 0.52 | 0.48 | 0.47 | 0.46 | 0.42  | 0.40  | 0.38  | 0.37  | 0.35  | 0.37  | 0.32  | 0.34  | 0.32  |
| Brazil  | G5470     | 1              | 1.00 | 1.00 | 0.99 | 0.99 | 0.98 | 0.97 | 0.96 | 0.95 | 0.93  | 0.92  | 0.88  | 0.84  | 0.80  | 0.75  | 0.70  | 0.52  | 0.40  |
| Brazil  | G5471     | 1              | 0.99 | 0.97 | 0.95 | 0.91 | 0.87 | 0.82 | 0.76 | 0.71 | 0.66  | 0.61  | 0.53  | 0.47  | 0.42  | 0.37  | 0.34  | 0.25  | 0.17  |
| Brazil  | G5472     | 1              | 0.94 | 0.81 | 0.72 | 0.68 | 0.64 | 0.59 | 0.57 | 0.56 | 0.52  | 0.50  | 0.47  | 0.44  | 0.42  | 0.42  | 0.38  | 0.38  | 0.35  |
| Brazil  | G5474     | 1              | 0.99 | 0.96 | 0.93 | 0.90 | 0.85 | 0.81 | 0.77 | 0.73 | 0.69  | 0.65  | 0.59  | 0.54  | 0.49  | 0.45  | 0.41  | 0.33  | 0.27  |
| Brazil  | G5475     | 1              | 0.91 | 0.80 | 0.69 | 0.60 | 0.52 | 0.45 | 0.40 | 0.35 | 0.31  | 0.27  | 0.20  | 0.16  | 0.12  | 0.09  | 0.06  | 0.01  | -0.03 |
| Brazil  | G5478     | 1              | 0.98 | 0.93 | 0.89 | 0.84 | 0.80 | 0.77 | 0.73 | 0.70 | 0.66  | 0.63  | 0.59  | 0.54  | 0.50  | 0.47  | 0.43  | 0.35  | 0.29  |
| Brazil  | G5479     | 1              | 1.00 | 0.99 | 0.99 | 0.98 | 0.97 | 0.96 | 0.95 | 0.93 | 0.91  | 0.89  | 0.86  | 0.81  | 0.75  | 0.67  | 0.58  | 0.41  | 0.33  |
| Brazil  | G5482     | 1              | 1.00 | 1.00 | 0.99 | 0.99 | 0.99 | 0.98 | 0.98 | 0.98 | 0.97  | 0.96  | 0.95  | 0.93  | 0.92  | 0.90  | 0.87  | 0.77  | 0.64  |
| Brazil  | G5483     | 1              | 1.00 | 0.99 | 0.97 | 0.95 | 0.92 | 0.88 | 0.84 | 0.80 | 0.75  | 0.71  | 0.63  | 0.56  | 0.50  | 0.45  | 0.39  | 0.28  | 0.18  |
| Brazil  | G5486     | 1              | 0.99 | 0.96 | 0.93 | 0.89 | 0.85 | 0.81 | 0.77 | 0.73 | 0.69  | 0.65  | 0.58  | 0.52  | 0.47  | 0.43  | 0.39  | 0.29  | 0.22  |
| Brazil  | G5487     | 1              | 1.00 | 0.99 | 0.97 | 0.95 | 0.91 | 0.87 | 0.82 | 0.77 | 0.72  | 0.68  | 0.63  | 0.58  | 0.54  | 0.50  | 0.47  | 0.40  | 0.33  |
| Brazil  | G5488     | 1              | 1.00 | 0.98 | 0.95 | 0.92 | 0.89 | 0.84 | 0.80 | 0.78 | 0.75  | 0.70  | 0.63  | 0.56  | 0.49  | 0.44  | 0.40  | 0.33  | 0.27  |
| Brazil  | G5490     | 1              | 0.99 | 0.97 | 0.94 | 0.91 | 0.87 | 0.83 | 0.78 | 0.74 | 0.70  | 0.67  | 0.59  | 0.53  | 0.48  | 0.43  | 0.39  | 0.28  | 0.20  |
| Brazil  | G5497     | 1              | 0.99 | 0.97 | 0.94 | 0.91 | 0.86 | 0.81 | 0.79 | 0.76 | 0.71  | 0.66  | 0.60  | 0.53  | 0.47  | 0.44  | 0.40  | 0.33  | 0.28  |
| Brazil  | G5498     | 1              | 0.99 | 0.96 | 0.92 | 0.89 | 0.85 | 0.80 | 0.77 | 0.73 | 0.70  | 0.66  | 0.58  | 0.52  | 0.45  | 0.40  | 0.36  | 0.29  | 0.24  |
| Brazil  | G5501     | 1              | 1.00 | 0.99 | 0.95 | 0.83 | 0.68 | 0.54 | 0.42 | 0.34 | 0.28  | 0.24  | 0.19  | 0.16  | 0.13  | 0.11  | 0.09  | 0.07  | 0.06  |
| Brazil  | G5503     | 1              | 1.00 | 0.99 | 0.99 | 0.99 | 0.98 | 0.98 | 0.97 | 0.97 | 0.96  | 0.95  | 0.94  | 0.91  | 0.88  | 0.84  | 0.80  | 0.68  | 0.57  |
| Brazil  | G5506     | 1              | 0.99 | 0.92 | 0.79 | 0.64 | 0.47 | 0.30 | 0.15 | 0.02 | -0.09 | -0.17 | -0.27 | -0.33 | -0.35 | -0.34 | -0.33 | -0.26 | -0.23 |
| Brazil  | G5513     | 1              | 1.00 | 0.99 | 0.98 | 0.97 | 0.96 | 0.94 | 0.93 | 0.91 | 0.90  | 0.87  | 0.79  | 0.68  | 0.56  | 0.45  | 0.38  | 0.29  | 0.23  |
| Brazil  | G5514     | 1              | 1.00 | 0.99 | 0.95 | 0.91 | 0.88 | 0.83 | 0.78 | 0.72 | 0.68  | 0.63  | 0.55  | 0.49  | 0.43  | 0.39  | 0.36  | 0.29  | 0.25  |
| Brazil  | G5517     | 1              | 1.00 | 0.99 | 0.96 | 0.92 | 0.86 | 0.80 | 0.74 | 0.68 | 0.63  | 0.59  | 0.50  | 0.43  | 0.37  | 0.32  | 0.28  | 0.21  | 0.17  |
| Brazil  | G5518     | 1              | 1.00 | 0.99 | 0.96 | 0.93 | 0.89 | 0.84 | 0.79 | 0.74 | 0.69  | 0.64  | 0.56  | 0.49  | 0.43  | 0.37  | 0.33  | 0.26  | 0.21  |
| Brazil  | G5519     | 1              | 0.99 | 0.97 | 0.94 | 0.92 | 0.88 | 0.84 | 0.81 | 0.77 | 0.74  | 0.70  | 0.65  | 0.59  | 0.53  | 0.49  | 0.45  | 0.40  | 0.35  |
| Brazil  | G5522     | 1              | 1.00 | 0.98 | 0.96 | 0.93 | 0.90 | 0.88 | 0.84 | 0.81 | 0.78  | 0.75  | 0.70  | 0.65  | 0.61  | 0.57  | 0.55  | 0.47  | 0.40  |
| Brazil  | G5523     | 1              | 1.00 | 0.99 | 0.96 | 0.93 | 0.89 | 0.85 | 0.81 | 0.77 | 0.74  | 0.70  | 0.65  | 0.60  | 0.56  | 0.53  | 0.51  | 0.46  | 0.43  |
| Brazil  | G5527     | 1              | 1.00 | 1.00 | 1.00 | 0.99 | 0.98 | 0.97 | 0.96 | 0.94 | 0.92  | 0.90  | 0.86  | 0.83  | 0.79  | 0.76  | 0.73  | 0.63  | 0.53  |
| Brazil  | G5529     | 1              | 0.99 | 0.98 | 0.96 | 0.94 | 0.90 | 0.85 | 0.80 | 0.74 | 0.68  | 0.62  | 0.51  | 0.42  | 0.34  | 0.30  | 0.27  | 0.23  | 0.18  |
| Brazil  | G5534     | 1              | 1.00 | 1.00 | 1.00 | 0.99 | 0.99 | 0.99 | 0.98 | 0.98 | 0.97  | 0.97  | 0.95  | 0.93  | 0.90  | 0.86  | 0.81  | 0.67  | 0.54  |
| Brazil  | G5535     | 1              | 1.00 | 0.99 | 0.97 | 0.93 | 0.86 | 0.77 | 0.68 | 0.60 | 0.54  | 0.49  | 0.42  | 0.37  | 0.32  | 0.30  | 0.27  | 0.19  | 0.13  |
| Brazil  | G5542     | 1              | 0.98 | 0.91 | 0.81 | 0.72 | 0.65 | 0.58 | 0.52 | 0.46 | 0.41  | 0.37  | 0.30  | 0.24  | 0.20  | 0.17  | 0.14  | 0.10  | 0.07  |
| Brazil  | G5543     | 1              | 1.00 | 1.00 | 1.00 | 0.99 | 0.99 | 0.98 | 0.98 | 0.97 | 0.97  | 0.96  | 0.94  | 0.91  | 0.87  | 0.81  | 0.76  | 0.62  | 0.49  |

| Country | GloFAS ID | Station filter | LT1  | LT2  | LT3  | LT4  | LT5  | LT6  | LT7  | LT8  | LT9  | LT10 | LT12 | LT14 | LT16 | LT18 | LT20 | LT25 | L30   |
|---------|-----------|----------------|------|------|------|------|------|------|------|------|------|------|------|------|------|------|------|------|-------|
| Brazil  | G5544     | 1              | 0.98 | 0.90 | 0.82 | 0.73 | 0.64 | 0.63 | 0.62 | 0.56 | 0.54 | 0.55 | 0.48 | 0.47 | 0.42 | 0.40 | 0.38 | 0.34 | 0.31  |
| Brazil  | G5546     | 1              | 1.00 | 1.00 | 1.00 | 1.00 | 1.00 | 1.00 | 0.99 | 0.99 | 0.99 | 0.99 | 0.98 | 0.98 | 0.98 | 0.97 | 0.97 | 0.94 | 0.92  |
| Brazil  | G5549     | 1              | 0.99 | 0.98 | 0.94 | 0.86 | 0.72 | 0.56 | 0.42 | 0.33 | 0.27 | 0.23 | 0.18 | 0.15 | 0.14 | 0.12 | 0.09 | 0.05 | 0.05  |
| Brazil  | G5550     | 1              | 0.99 | 0.96 | 0.90 | 0.79 | 0.67 | 0.56 | 0.48 | 0.43 | 0.39 | 0.35 | 0.29 | 0.25 | 0.22 | 0.19 | 0.17 | 0.13 | 0.09  |
| Brazil  | G5551     | 1              | 0.97 | 0.91 | 0.86 | 0.83 | 0.80 | 0.77 | 0.75 | 0.73 | 0.71 | 0.70 | 0.67 | 0.64 | 0.61 | 0.59 | 0.55 | 0.49 | 0.42  |
| Brazil  | G5552     | 1              | 1.00 | 1.00 | 0.99 | 0.99 | 0.98 | 0.98 | 0.97 | 0.96 | 0.95 | 0.95 | 0.91 | 0.87 | 0.81 | 0.75 | 0.69 | 0.55 | 0.42  |
| Brazil  | G5553     | 1              | 0.96 | 0.90 | 0.86 | 0.81 | 0.76 | 0.71 | 0.66 | 0.61 | 0.56 | 0.52 | 0.45 | 0.39 | 0.33 | 0.26 | 0.18 | 0.04 | -0.05 |
| Brazil  | G5555     | 1              | 0.98 | 0.95 | 0.90 | 0.85 | 0.81 | 0.77 | 0.73 | 0.70 | 0.66 | 0.63 | 0.58 | 0.53 | 0.48 | 0.45 | 0.42 | 0.35 | 0.30  |
| Brazil  | G5556     | 1              | 0.95 | 0.90 | 0.85 | 0.80 | 0.76 | 0.72 | 0.69 | 0.65 | 0.62 | 0.59 | 0.54 | 0.49 | 0.45 | 0.41 | 0.37 | 0.28 | 0.21  |
| Brazil  | G5557     | 1              | 0.99 | 0.97 | 0.95 | 0.93 | 0.89 | 0.86 | 0.83 | 0.80 | 0.77 | 0.74 | 0.68 | 0.63 | 0.58 | 0.54 | 0.49 | 0.38 | 0.28  |
| Brazil  | G5559     | 1              | 1.00 | 1.00 | 1.00 | 0.99 | 0.99 | 0.99 | 0.99 | 0.99 | 0.98 | 0.98 | 0.98 | 0.97 | 0.96 | 0.96 | 0.95 | 0.92 | 0.88  |
| Brazil  | G5560     | 1              | 0.99 | 0.95 | 0.90 | 0.88 | 0.85 | 0.81 | 0.77 | 0.75 | 0.72 | 0.68 | 0.63 | 0.60 | 0.55 | 0.52 | 0.51 | 0.44 | 0.38  |
| Brazil  | G5562     | 1              | 1.00 | 1.00 | 0.99 | 0.99 | 0.98 | 0.98 | 0.97 | 0.96 | 0.95 | 0.93 | 0.90 | 0.86 | 0.82 | 0.77 | 0.72 | 0.60 | 0.49  |
| Brazil  | G5565     | 1              | 1.00 | 0.99 | 0.97 | 0.94 | 0.91 | 0.88 | 0.84 | 0.81 | 0.77 | 0.74 | 0.69 | 0.63 | 0.58 | 0.53 | 0.48 | 0.37 | 0.28  |
| Brazil  | G5566     | 1              | 1.00 | 1.00 | 0.99 | 0.98 | 0.97 | 0.96 | 0.94 | 0.92 | 0.90 | 0.88 | 0.85 | 0.81 | 0.77 | 0.74 | 0.70 | 0.61 | 0.53  |
| Brazil  | G5567     | 1              | 1.00 | 0.99 | 0.98 | 0.95 | 0.91 | 0.87 | 0.84 | 0.80 | 0.77 | 0.75 | 0.70 | 0.66 | 0.62 | 0.58 | 0.54 | 0.46 | 0.38  |
| Brazil  | G5568     | 1              | 0.98 | 0.92 | 0.86 | 0.80 | 0.76 | 0.72 | 0.69 | 0.67 | 0.65 | 0.63 | 0.60 | 0.55 | 0.52 | 0.49 | 0.48 | 0.44 | 0.39  |
| Brazil  | G5569     | 1              | 0.94 | 0.87 | 0.83 | 0.79 | 0.77 | 0.74 | 0.74 | 0.71 | 0.72 | 0.72 | 0.69 | 0.67 | 0.63 | 0.59 | 0.58 | 0.54 | 0.50  |
| Brazil  | G5570     | 1              | 0.94 | 0.85 | 0.77 | 0.75 | 0.72 | 0.63 | 0.61 | 0.61 | 0.58 | 0.53 | 0.53 | 0.45 | 0.43 | 0.41 | 0.36 | 0.30 | 0.25  |
| Brazil  | G5572     | 1              | 0.99 | 0.97 | 0.94 | 0.91 | 0.88 | 0.85 | 0.82 | 0.80 | 0.77 | 0.74 | 0.67 | 0.60 | 0.54 | 0.48 | 0.43 | 0.30 | 0.20  |
| Brazil  | G5575     | 1              | 1.00 | 0.98 | 0.95 | 0.91 | 0.87 | 0.83 | 0.80 | 0.76 | 0.72 | 0.69 | 0.61 | 0.55 | 0.49 | 0.44 | 0.39 | 0.29 | 0.21  |
| Brazil  | G5577     | 1              | 1.00 | 1.00 | 0.99 | 0.99 | 0.98 | 0.97 | 0.96 | 0.95 | 0.93 | 0.91 | 0.85 | 0.78 | 0.72 | 0.65 | 0.59 | 0.46 | 0.35  |
| Brazil  | G5578     | 1              | 1.00 | 0.99 | 0.96 | 0.92 | 0.85 | 0.77 | 0.70 | 0.65 | 0.61 | 0.59 | 0.54 | 0.51 | 0.48 | 0.45 | 0.41 | 0.30 | 0.19  |
| Brazil  | G5581     | 1              | 0.99 | 0.95 | 0.92 | 0.88 | 0.84 | 0.80 | 0.76 | 0.72 | 0.68 | 0.65 | 0.59 | 0.53 | 0.48 | 0.43 | 0.39 | 0.29 | 0.21  |
| Brazil  | G5582     | 1              | 1.00 | 1.00 | 0.99 | 0.99 | 0.98 | 0.96 | 0.95 | 0.93 | 0.91 | 0.88 | 0.83 | 0.78 | 0.74 | 0.69 | 0.65 | 0.56 | 0.49  |
| Brazil  | G5583     | 1              | 1.00 | 0.99 | 0.95 | 0.89 | 0.83 | 0.78 | 0.75 | 0.71 | 0.68 | 0.66 | 0.61 | 0.57 | 0.53 | 0.50 | 0.47 | 0.39 | 0.33  |
| Brazil  | G5586     | 1              | 0.99 | 0.97 | 0.94 | 0.91 | 0.89 | 0.86 | 0.84 | 0.82 | 0.80 | 0.77 | 0.70 | 0.63 | 0.56 | 0.49 | 0.43 | 0.30 | 0.19  |
| Brazil  | G5589     | 1              | 0.99 | 0.96 | 0.91 | 0.86 | 0.81 | 0.76 | 0.71 | 0.68 | 0.64 | 0.60 | 0.54 | 0.49 | 0.44 | 0.41 | 0.39 | 0.34 | 0.29  |
| Brazil  | G5590     | 1              | 0.99 | 0.93 | 0.86 | 0.80 | 0.76 | 0.72 | 0.68 | 0.64 | 0.61 | 0.58 | 0.52 | 0.47 | 0.43 | 0.38 | 0.34 | 0.27 | 0.22  |
| Brazil  | G5591     | 1              | 0.99 | 0.98 | 0.96 | 0.93 | 0.90 | 0.87 | 0.83 | 0.79 | 0.74 | 0.70 | 0.61 | 0.53 | 0.46 | 0.40 | 0.35 | 0.23 | 0.13  |
| Brazil  | G5592     | 1              | 0.99 | 0.96 | 0.92 | 0.88 | 0.85 | 0.81 | 0.78 | 0.75 | 0.72 | 0.69 | 0.63 | 0.58 | 0.54 | 0.49 | 0.45 | 0.36 | 0.29  |
| Brazil  | G5593     | 1              | 1.00 | 0.99 | 0.99 | 0.97 | 0.96 | 0.94 | 0.91 | 0.89 | 0.86 | 0.83 | 0.76 | 0.70 | 0.64 | 0.59 | 0.54 | 0.44 | 0.35  |
| Brazil  | G5597     | 1              | 0.99 | 0.97 | 0.95 | 0.93 | 0.90 | 0.89 | 0.88 | 0.85 | 0.84 | 0.83 | 0.80 | 0.77 | 0.73 | 0.71 | 0.69 | 0.65 | 0.60  |
| Brazil  | G5599     | 1              | 1.00 | 1.00 | 0.99 | 0.98 | 0.97 | 0.95 | 0.93 | 0.90 | 0.87 | 0.83 | 0.75 | 0.68 | 0.62 | 0.57 | 0.52 | 0.43 | 0.34  |
| Brazil  | G5600     | 1              | 0.99 | 0.97 | 0.94 | 0.90 | 0.86 | 0.82 | 0.78 | 0.74 | 0.71 | 0.69 | 0.64 | 0.59 | 0.54 | 0.50 | 0.47 | 0.37 | 0.30  |
| Brazil  | G5601     | 1              | 0.99 | 0.94 | 0.90 | 0.86 | 0.82 | 0.80 | 0.77 | 0.75 | 0.73 | 0.72 | 0.69 | 0.66 | 0.64 | 0.62 | 0.58 | 0.54 | 0.49  |
| Brazil  | G5605     | 1              | 0.99 | 0.97 | 0.94 | 0.90 | 0.86 | 0.82 | 0.78 | 0.74 | 0.70 | 0.67 | 0.60 | 0.55 | 0.50 | 0.45 | 0.41 | 0.30 | 0.21  |
| Brazil  | G5606     | 1              | 1.00 | 0.98 | 0.96 | 0.94 | 0.92 | 0.90 | 0.87 | 0.84 | 0.81 | 0.77 | 0.69 | 0.61 | 0.55 | 0.49 | 0.44 | 0.33 | 0.25  |
| Brazil  | G5609     | 1              | 0.95 | 0.86 | 0.79 | 0.74 | 0.68 | 0.64 | 0.60 | 0.56 | 0.52 | 0.48 | 0.41 | 0.36 | 0.31 | 0.28 | 0.24 | 0.17 | 0.13  |

| Country | GloFAS ID | Station filter | LT1  | LT2  | LT3  | LT4  | LT5  | LT6  | LT7  | LT8  | LT9  | LT10 | LT12 | LT14 | LT16 | LT18 | LT20 | LT25 | L30  |
|---------|-----------|----------------|------|------|------|------|------|------|------|------|------|------|------|------|------|------|------|------|------|
| Brazil  | G5610     | 1              | 0.99 | 0.91 | 0.70 | 0.48 | 0.30 | 0.18 | 0.14 | 0.13 | 0.14 | 0.16 | 0.20 | 0.23 | 0.24 | 0.26 | 0.26 | 0.23 | 0.20 |
| Brazil  | G5611     | 1              | 0.96 | 0.87 | 0.79 | 0.74 | 0.72 | 0.69 | 0.65 | 0.63 | 0.61 | 0.58 | 0.54 | 0.49 | 0.47 | 0.43 | 0.40 | 0.34 | 0.30 |
| Brazil  | G5612     | 1              | 1.00 | 0.99 | 0.97 | 0.95 | 0.91 | 0.88 | 0.84 | 0.81 | 0.77 | 0.73 | 0.67 | 0.61 | 0.55 | 0.50 | 0.45 | 0.33 | 0.25 |
| Brazil  | G5613     | 1              | 1.00 | 0.98 | 0.96 | 0.92 | 0.88 | 0.84 | 0.80 | 0.76 | 0.72 | 0.69 | 0.62 | 0.56 | 0.50 | 0.45 | 0.40 | 0.28 | 0.19 |
| Brazil  | G5616     | 1              | 1.00 | 0.99 | 0.97 | 0.95 | 0.92 | 0.88 | 0.84 | 0.80 | 0.77 | 0.74 | 0.68 | 0.63 | 0.58 | 0.55 | 0.51 | 0.46 | 0.41 |
| Brazil  | G5619     | 1              | 0.92 | 0.81 | 0.74 | 0.68 | 0.63 | 0.60 | 0.56 | 0.52 | 0.49 | 0.45 | 0.39 | 0.34 | 0.30 | 0.27 | 0.24 | 0.18 | 0.14 |
| Brazil  | G5621     | 1              | 1.00 | 1.00 | 0.99 | 0.98 | 0.97 | 0.96 | 0.95 | 0.93 | 0.92 | 0.90 | 0.86 | 0.82 | 0.78 | 0.73 | 0.67 | 0.52 | 0.37 |
| Brazil  | G5622     | 1              | 1.00 | 0.99 | 0.97 | 0.90 | 0.86 | 0.85 | 0.79 | 0.76 | 0.75 | 0.73 | 0.65 | 0.62 | 0.59 | 0.52 | 0.49 | 0.45 | 0.35 |
| Brazil  | G5629     | 1              | 0.96 | 0.89 | 0.83 | 0.79 | 0.76 | 0.75 | 0.73 | 0.72 | 0.70 | 0.69 | 0.66 | 0.63 | 0.60 | 0.58 | 0.55 | 0.50 | 0.45 |
| Brazil  | G5630     | 1              | 0.99 | 0.99 | 0.96 | 0.93 | 0.89 | 0.87 | 0.83 | 0.78 | 0.73 | 0.70 | 0.63 | 0.59 | 0.54 | 0.51 | 0.48 | 0.41 | 0.33 |
| Brazil  | G5637     | 1              | 0.96 | 0.91 | 0.87 | 0.83 | 0.78 | 0.74 | 0.70 | 0.66 | 0.64 | 0.62 | 0.58 | 0.55 | 0.50 | 0.48 | 0.44 | 0.37 | 0.33 |
| Brazil  | G5641     | 1              | 1.00 | 1.00 | 0.99 | 0.98 | 0.96 | 0.93 | 0.90 | 0.86 | 0.83 | 0.80 | 0.74 | 0.68 | 0.63 | 0.60 | 0.56 | 0.49 | 0.42 |
| Brazil  | G5642     | 1              | 0.98 | 0.94 | 0.89 | 0.84 | 0.79 | 0.74 | 0.70 | 0.67 | 0.64 | 0.62 | 0.57 | 0.54 | 0.50 | 0.48 | 0.47 | 0.41 | 0.37 |
| Brazil  | G5654     | 1              | 1.00 | 1.00 | 0.99 | 0.99 | 0.98 | 0.96 | 0.95 | 0.93 | 0.91 | 0.89 | 0.84 | 0.80 | 0.77 | 0.73 | 0.70 | 0.61 | 0.54 |
| Brazil  | G5684     | 1              | 0.98 | 0.95 | 0.90 | 0.85 | 0.81 | 0.77 | 0.73 | 0.70 | 0.67 | 0.64 | 0.59 | 0.54 | 0.51 | 0.48 | 0.45 | 0.39 | 0.35 |
| Brazil  | G5686     | 1              | 0.96 | 0.91 | 0.87 | 0.83 | 0.79 | 0.76 | 0.72 | 0.70 | 0.67 | 0.64 | 0.59 | 0.55 | 0.51 | 0.47 | 0.44 | 0.38 | 0.33 |
| Brazil  | G5690     | 1              | 0.99 | 0.97 | 0.94 | 0.91 | 0.87 | 0.83 | 0.79 | 0.75 | 0.72 | 0.69 | 0.63 | 0.59 | 0.55 | 0.50 | 0.46 | 0.39 | 0.34 |
| Brazil  | G5691     | 1              | 1.00 | 0.99 | 0.96 | 0.94 | 0.91 | 0.89 | 0.87 | 0.84 | 0.82 | 0.79 | 0.76 | 0.73 | 0.69 | 0.66 | 0.62 | 0.55 | 0.50 |
| Brazil  | G5705     | 1              | 0.99 | 0.96 | 0.93 | 0.91 | 0.89 | 0.86 | 0.85 | 0.83 | 0.80 | 0.79 | 0.76 | 0.74 | 0.71 | 0.68 | 0.65 | 0.60 | 0.56 |
| Brazil  | G5712     | 1              | 1.00 | 0.99 | 0.97 | 0.94 | 0.91 | 0.87 | 0.83 | 0.79 | 0.75 | 0.72 | 0.66 | 0.61 | 0.56 | 0.52 | 0.48 | 0.40 | 0.33 |
| Brazil  | G5716     | 1              | 0.99 | 0.95 | 0.88 | 0.82 | 0.76 | 0.71 | 0.67 | 0.63 | 0.59 | 0.56 | 0.51 | 0.46 | 0.43 | 0.40 | 0.36 | 0.30 | 0.23 |
| Brazil  | G5719     | 1              | 0.99 | 0.98 | 0.97 | 0.96 | 0.94 | 0.91 | 0.88 | 0.84 | 0.80 | 0.76 | 0.69 | 0.63 | 0.57 | 0.51 | 0.46 | 0.36 | 0.29 |
| Brazil  | G5720     | 1              | 0.90 | 0.81 | 0.65 | 0.54 | 0.49 | 0.48 | 0.47 | 0.45 | 0.44 | 0.43 | 0.39 | 0.36 | 0.33 | 0.31 | 0.29 | 0.25 | 0.22 |
| Brazil  | G5721     | 1              | 0.90 | 0.85 | 0.83 | 0.80 | 0.77 | 0.75 | 0.73 | 0.69 | 0.67 | 0.65 | 0.60 | 0.54 | 0.50 | 0.46 | 0.43 | 0.36 | 0.31 |
| Brazil  | G5722     | 1              | 0.98 | 0.94 | 0.91 | 0.90 | 0.88 | 0.87 | 0.86 | 0.85 | 0.83 | 0.82 | 0.81 | 0.80 | 0.78 | 0.76 | 0.74 | 0.70 | 0.67 |
| Brazil  | G5725     | 1              | 0.99 | 0.98 | 0.97 | 0.96 | 0.94 | 0.93 | 0.90 | 0.87 | 0.84 | 0.80 | 0.73 | 0.67 | 0.61 | 0.56 | 0.50 | 0.39 | 0.31 |
| Brazil  | G5738     | 1              | 0.99 | 0.97 | 0.95 | 0.92 | 0.89 | 0.86 | 0.82 | 0.79 | 0.75 | 0.72 | 0.65 | 0.59 | 0.53 | 0.47 | 0.42 | 0.32 | 0.25 |
| Brazil  | G5739     | 1              | 0.99 | 0.95 | 0.90 | 0.83 | 0.75 | 0.70 | 0.66 | 0.64 | 0.61 | 0.58 | 0.54 | 0.49 | 0.44 | 0.40 | 0.36 | 0.30 | 0.24 |
| Brazil  | G5745     | 1              | 0.99 | 0.95 | 0.89 | 0.82 | 0.76 | 0.70 | 0.66 | 0.62 | 0.59 | 0.56 | 0.52 | 0.47 | 0.43 | 0.41 | 0.39 | 0.34 | 0.31 |
| Brazil  | G5746     | 1              | 1.00 | 0.99 | 0.97 | 0.94 | 0.90 | 0.85 | 0.80 | 0.75 | 0.69 | 0.64 | 0.55 | 0.48 | 0.42 | 0.38 | 0.36 | 0.32 | 0.29 |
| Brazil  | G5752     | 1              | 0.99 | 0.97 | 0.95 | 0.91 | 0.88 | 0.84 | 0.81 | 0.77 | 0.74 | 0.71 | 0.66 | 0.61 | 0.56 | 0.52 | 0.48 | 0.41 | 0.36 |
| Brazil  | G5754     | 1              | 0.99 | 0.98 | 0.97 | 0.95 | 0.92 | 0.88 | 0.83 | 0.79 | 0.75 | 0.71 | 0.65 | 0.60 | 0.55 | 0.51 | 0.48 | 0.40 | 0.35 |
| Brazil  | G5755     | 1              | 0.99 | 0.97 | 0.95 | 0.92 | 0.89 | 0.86 | 0.83 | 0.80 | 0.77 | 0.74 | 0.68 | 0.63 | 0.59 | 0.55 | 0.51 | 0.44 | 0.39 |
| Brazil  | G5760     | 1              | 0.99 | 0.97 | 0.94 | 0.90 | 0.85 | 0.81 | 0.76 | 0.72 | 0.67 | 0.63 | 0.56 | 0.50 | 0.45 | 0.42 | 0.40 | 0.34 | 0.31 |
| Brazil  | G5761     | 1              | 1.00 | 0.99 | 0.99 | 0.99 | 0.99 | 0.98 | 0.98 | 0.97 | 0.97 | 0.96 | 0.95 | 0.94 | 0.92 | 0.90 | 0.89 | 0.84 | 0.79 |
| Brazil  | G5765     | 1              | 0.99 | 0.96 | 0.91 | 0.87 | 0.84 | 0.81 | 0.77 | 0.73 | 0.70 | 0.67 | 0.63 | 0.59 | 0.56 | 0.52 | 0.51 | 0.45 | 0.41 |
| Brazil  | G5766     | 1              | 1.00 | 0.99 | 0.98 | 0.97 | 0.97 | 0.96 | 0.95 | 0.94 | 0.93 | 0.92 | 0.90 | 0.89 | 0.87 | 0.85 | 0.83 | 0.79 | 0.74 |
| Brazil  | G5769     | 1              | 1.00 | 0.99 | 0.97 | 0.96 | 0.92 | 0.89 | 0.86 | 0.82 | 0.79 | 0.77 | 0.72 | 0.68 | 0.63 | 0.60 | 0.56 | 0.50 | 0.45 |
| Brazil  | G5771     | 1              | 1.00 | 0.98 | 0.98 | 0.98 | 0.97 | 0.96 | 0.96 | 0.95 | 0.94 | 0.93 | 0.92 | 0.91 | 0.89 | 0.88 | 0.86 | 0.83 | 0.79 |

| Country | GloFAS ID | Station filter | LT1  | LT2  | LT3  | LT4  | LT5  | LT6  | LT7  | LT8  | LT9  | LT10 | LT12 | LT14 | LT16 | LT18 | LT20 | LT25 | L30  |
|---------|-----------|----------------|------|------|------|------|------|------|------|------|------|------|------|------|------|------|------|------|------|
| Brazil  | G5772     | 1              | 0.99 | 0.98 | 0.95 | 0.92 | 0.88 | 0.84 | 0.80 | 0.77 | 0.75 | 0.73 | 0.68 | 0.63 | 0.59 | 0.56 | 0.53 | 0.48 | 0.44 |
| Brazil  | G5774     | 1              | 0.95 | 0.83 | 0.73 | 0.66 | 0.63 | 0.60 | 0.58 | 0.54 | 0.52 | 0.52 | 0.49 | 0.48 | 0.48 | 0.46 | 0.44 | 0.40 | 0.36 |
| Brazil  | G5779     | 1              | 0.93 | 0.91 | 0.88 | 0.84 | 0.80 | 0.78 | 0.75 | 0.71 | 0.68 | 0.66 | 0.61 | 0.58 | 0.53 | 0.50 | 0.48 | 0.43 | 0.39 |
| Brazil  | G5780     | 1              | 0.99 | 0.95 | 0.87 | 0.77 | 0.69 | 0.64 | 0.59 | 0.54 | 0.51 | 0.49 | 0.44 | 0.40 | 0.36 | 0.34 | 0.32 | 0.27 | 0.25 |
| Brazil  | G5781     | 1              | 0.96 | 0.92 | 0.87 | 0.80 | 0.73 | 0.67 | 0.64 | 0.60 | 0.58 | 0.56 | 0.51 | 0.46 | 0.41 | 0.38 | 0.35 | 0.28 | 0.23 |
| Brazil  | G5782     | 1              | 0.95 | 0.91 | 0.87 | 0.79 | 0.72 | 0.67 | 0.64 | 0.60 | 0.58 | 0.55 | 0.51 | 0.46 | 0.41 | 0.38 | 0.35 | 0.29 | 0.24 |
| Brazil  | G5783     | 1              | 0.99 | 0.96 | 0.90 | 0.82 | 0.75 | 0.67 | 0.62 | 0.56 | 0.52 | 0.48 | 0.43 | 0.38 | 0.34 | 0.31 | 0.28 | 0.24 | 0.21 |
| Brazil  | G5784     | 1              | 1.00 | 0.99 | 0.98 | 0.97 | 0.96 | 0.95 | 0.94 | 0.93 | 0.92 | 0.91 | 0.88 | 0.86 | 0.84 | 0.82 | 0.79 | 0.74 | 0.70 |
| Brazil  | G5785     | 1              | 1.00 | 1.00 | 1.00 | 0.99 | 0.99 | 0.98 | 0.97 | 0.97 | 0.96 | 0.95 | 0.92 | 0.90 | 0.88 | 0.85 | 0.83 | 0.78 | 0.73 |
| Brazil  | G5787     | 1              | 1.00 | 0.99 | 0.97 | 0.94 | 0.91 | 0.87 | 0.83 | 0.80 | 0.77 | 0.74 | 0.68 | 0.63 | 0.58 | 0.55 | 0.52 | 0.47 | 0.41 |
| Brazil  | G5795     | 1              | 1.00 | 0.99 | 0.98 | 0.96 | 0.93 | 0.90 | 0.85 | 0.80 | 0.76 | 0.72 | 0.63 | 0.55 | 0.49 | 0.42 | 0.37 | 0.28 | 0.25 |
| Brazil  | G5796     | 1              | 0.98 | 0.92 | 0.85 | 0.76 | 0.70 | 0.65 | 0.60 | 0.55 | 0.51 | 0.48 | 0.43 | 0.39 | 0.36 | 0.33 | 0.31 | 0.28 | 0.26 |
| Brazil  | G5799     | 1              | 1.00 | 0.99 | 0.97 | 0.95 | 0.93 | 0.91 | 0.89 | 0.87 | 0.85 | 0.84 | 0.81 | 0.78 | 0.75 | 0.73 | 0.71 | 0.66 | 0.62 |
| Brazil  | G5801     | 1              | 1.00 | 1.00 | 0.99 | 0.99 | 0.98 | 0.98 | 0.97 | 0.97 | 0.96 | 0.96 | 0.95 | 0.94 | 0.93 | 0.92 | 0.91 | 0.89 | 0.86 |
| Brazil  | G5805     | 1              | 0.99 | 0.97 | 0.95 | 0.91 | 0.87 | 0.84 | 0.80 | 0.75 | 0.72 | 0.69 | 0.63 | 0.59 | 0.54 | 0.51 | 0.48 | 0.43 | 0.38 |
| Brazil  | G5811     | 1              | 1.00 | 1.00 | 1.00 | 1.00 | 0.99 | 0.99 | 0.98 | 0.98 | 0.97 | 0.97 | 0.95 | 0.93 | 0.92 | 0.90 | 0.88 | 0.84 | 0.80 |
| Brazil  | G5816     | 1              | 1.00 | 0.99 | 0.97 | 0.94 | 0.90 | 0.86 | 0.81 | 0.77 | 0.73 | 0.69 | 0.61 | 0.55 | 0.49 | 0.44 | 0.39 | 0.30 | 0.22 |
| Brazil  | G5817     | 1              | 1.00 | 1.00 | 1.00 | 1.00 | 0.99 | 0.99 | 0.98 | 0.98 | 0.97 | 0.97 | 0.95 | 0.94 | 0.92 | 0.91 | 0.89 | 0.85 | 0.81 |
| Brazil  | G5818     | 1              | 1.00 | 1.00 | 1.00 | 1.00 | 0.99 | 0.99 | 0.99 | 0.99 | 0.98 | 0.98 | 0.98 | 0.97 | 0.96 | 0.95 | 0.94 | 0.92 | 0.89 |
| Brazil  | G5820     | 1              | 1.00 | 0.99 | 0.99 | 0.99 | 0.99 | 0.99 | 0.98 | 0.98 | 0.97 | 0.97 | 0.96 | 0.95 | 0.93 | 0.92 | 0.90 | 0.87 | 0.83 |
| Brazil  | G5832     | 1              | 1.00 | 0.99 | 0.99 | 0.98 | 0.97 | 0.96 | 0.94 | 0.91 | 0.88 | 0.84 | 0.77 | 0.71 | 0.65 | 0.60 | 0.55 | 0.45 | 0.38 |
| Brazil  | G5833     | 1              | 1.00 | 0.99 | 0.97 | 0.94 | 0.91 | 0.87 | 0.83 | 0.80 | 0.76 | 0.73 | 0.67 | 0.63 | 0.59 | 0.58 | 0.58 | 0.56 | 0.53 |
| Brazil  | G5834     | 1              | 1.00 | 1.00 | 1.00 | 1.00 | 0.99 | 0.99 | 0.99 | 0.98 | 0.97 | 0.97 | 0.95 | 0.93 | 0.91 | 0.89 | 0.88 | 0.83 | 0.79 |
| Brazil  | G5840     | 1              | 1.00 | 0.99 | 0.97 | 0.94 | 0.91 | 0.87 | 0.83 | 0.78 | 0.75 | 0.71 | 0.63 | 0.57 | 0.52 | 0.48 | 0.43 | 0.35 | 0.28 |
| Brazil  | G5841     | 1              | 0.99 | 0.95 | 0.89 | 0.83 | 0.77 | 0.73 | 0.69 | 0.65 | 0.63 | 0.61 | 0.57 | 0.54 | 0.51 | 0.49 | 0.48 | 0.44 | 0.41 |
| Brazil  | G5842     | 1              | 1.00 | 1.00 | 1.00 | 0.99 | 0.99 | 0.99 | 0.98 | 0.97 | 0.97 | 0.96 | 0.94 | 0.92 | 0.90 | 0.89 | 0.87 | 0.83 | 0.79 |
| Brazil  | G5843     | 1              | 0.99 | 0.95 | 0.90 | 0.86 | 0.81 | 0.76 | 0.72 | 0.68 | 0.64 | 0.60 | 0.54 | 0.50 | 0.45 | 0.43 | 0.42 | 0.40 | 0.37 |
| Brazil  | G5850     | 1              | 0.97 | 0.92 | 0.87 | 0.84 | 0.81 | 0.77 | 0.73 | 0.71 | 0.68 | 0.65 | 0.61 | 0.56 | 0.54 | 0.51 | 0.49 | 0.44 | 0.43 |
| Brazil  | G5851     | 1              | 1.00 | 1.00 | 0.99 | 0.99 | 0.98 | 0.98 | 0.97 | 0.96 | 0.95 | 0.94 | 0.92 | 0.90 | 0.88 | 0.87 | 0.85 | 0.81 | 0.77 |
| Brazil  | G5853     | 1              | 0.99 | 0.98 | 0.96 | 0.95 | 0.93 | 0.92 | 0.91 | 0.89 | 0.88 | 0.87 | 0.84 | 0.82 | 0.79 | 0.77 | 0.74 | 0.69 | 0.63 |
| Brazil  | G5863     | 1              | 1.00 | 0.99 | 0.99 | 0.98 | 0.97 | 0.97 | 0.96 | 0.95 | 0.94 | 0.93 | 0.91 | 0.89 | 0.87 | 0.85 | 0.83 | 0.79 | 0.76 |
| Brazil  | G5870     | 1              | 1.00 | 1.00 | 1.00 | 0.99 | 0.99 | 0.99 | 0.98 | 0.98 | 0.97 | 0.97 | 0.95 | 0.94 | 0.92 | 0.91 | 0.89 | 0.85 | 0.81 |
| Brazil  | G5871     | 1              | 0.99 | 0.94 | 0.88 | 0.82 | 0.77 | 0.72 | 0.69 | 0.67 | 0.64 | 0.62 | 0.59 | 0.55 | 0.51 | 0.51 | 0.49 | 0.47 | 0.44 |
| Brazil  | G5872     | 1              | 0.99 | 0.95 | 0.91 | 0.84 | 0.79 | 0.74 | 0.70 | 0.66 | 0.63 | 0.60 | 0.53 | 0.49 | 0.46 | 0.44 | 0.41 | 0.37 | 0.33 |
| Brazil  | G5873     | 1              | 0.93 | 0.82 | 0.72 | 0.64 | 0.57 | 0.52 | 0.47 | 0.42 | 0.38 | 0.35 | 0.29 | 0.25 | 0.22 | 0.22 | 0.21 | 0.20 | 0.20 |
| Brazil  | G5879     | 1              | 1.00 | 0.99 | 0.99 | 0.98 | 0.98 | 0.97 | 0.97 | 0.96 | 0.95 | 0.94 | 0.92 | 0.90 | 0.88 | 0.86 | 0.84 | 0.80 | 0.76 |
| Brazil  | G5887     | 1              | 1.00 | 1.00 | 0.99 | 0.98 | 0.97 | 0.95 | 0.94 | 0.93 | 0.92 | 0.91 | 0.88 | 0.86 | 0.83 | 0.81 | 0.79 | 0.75 | 0.72 |
| Brazil  | G5897     | 1              | 1.00 | 0.99 | 0.99 | 0.98 | 0.97 | 0.95 | 0.94 | 0.93 | 0.91 | 0.90 | 0.87 | 0.84 | 0.81 | 0.78 | 0.75 | 0.68 | 0.61 |
| Brazil  | G5902     | 1              | 1.00 | 0.99 | 0.98 | 0.97 | 0.97 | 0.96 | 0.95 | 0.94 | 0.93 | 0.93 | 0.91 | 0.89 | 0.87 | 0.86 | 0.84 | 0.79 | 0.74 |



| Country  | GloFAS ID | Station filter | LT1  | LT2  | LT3   | LT4   | LT5   | LT6   | LT7   | LT8   | LT9   | LT10  | LT12  | LT14  | LT16  | LT18  | LT20  | LT25  | L30   |
|----------|-----------|----------------|------|------|-------|-------|-------|-------|-------|-------|-------|-------|-------|-------|-------|-------|-------|-------|-------|
| Brazil   | G5903     | 1              | 1.00 | 1.00 | 0.99  | 0.99  | 0.98  | 0.97  | 0.96  | 0.95  | 0.94  | 0.93  | 0.90  | 0.87  | 0.84  | 0.81  | 0.78  | 0.73  | 0.68  |
| Brazil   | G5970     | 1              | 0.96 | 0.85 | 0.75  | 0.69  | 0.63  | 0.59  | 0.56  | 0.53  | 0.50  | 0.47  | 0.43  | 0.39  | 0.36  | 0.33  | 0.30  | 0.25  | 0.21  |
| Brazil   | G5973     | 1              | 0.96 | 0.83 | 0.72  | 0.65  | 0.60  | 0.56  | 0.53  | 0.51  | 0.47  | 0.44  | 0.40  | 0.36  | 0.32  | 0.29  | 0.25  | 0.21  | 0.18  |
| Brazil   | G6009     | 1              | 0.96 | 0.79 | 0.69  | 0.63  | 0.60  | 0.56  | 0.54  | 0.51  | 0.49  | 0.45  | 0.41  | 0.36  | 0.32  | 0.29  | 0.24  | 0.19  | 0.16  |
| Brazil   | G6012     | 1              | 1.00 | 0.97 | 0.91  | 0.84  | 0.78  | 0.73  | 0.69  | 0.66  | 0.62  | 0.60  | 0.54  | 0.49  | 0.44  | 0.41  | 0.37  | 0.31  | 0.27  |
| Brazil   | G6018     | 1              | 1.00 | 1.00 | 0.99  | 0.97  | 0.94  | 0.89  | 0.84  | 0.79  | 0.74  | 0.70  | 0.63  | 0.57  | 0.52  | 0.46  | 0.41  | 0.31  | 0.26  |
| Chile    | G5804     | 1              | 0.99 | 0.92 | 0.79  | 0.65  | 0.53  | 0.42  | 0.35  | 0.30  | 0.25  | 0.21  | 0.16  | 0.12  | 0.08  | 0.07  | 0.12  | 0.16  | 0.12  |
| Chile    | G5830     | 1              | 0.54 | 0.25 | 0.04  | -0.08 | -0.15 | -0.21 | -0.25 | -0.27 | -0.29 | -0.32 | -0.34 | -0.39 | -0.33 | -0.24 | -0.23 | -0.28 | -0.32 |
| Chile    | G5984     | 1              | 0.83 | 0.62 | 0.56  | 0.54  | 0.53  | 0.50  | 0.47  | 0.44  | 0.41  | 0.39  | 0.35  | 0.27  | 0.20  | -0.03 | -0.07 | -0.10 | -0.09 |
| Chile    | G6016     | 1              | 0.97 | 0.84 | 0.70  | 0.61  | 0.55  | 0.51  | 0.46  | 0.40  | 0.36  | 0.33  | 0.31  | 0.25  | 0.18  | -0.22 | -0.26 | -0.07 | 0.02  |
| Chile    | G6028     | 1              | 0.72 | 0.46 | 0.37  | 0.31  | 0.27  | 0.23  | 0.20  | 0.17  | 0.16  | 0.14  | 0.13  | 0.12  | 0.13  | -0.18 | -0.27 | -0.49 | -0.51 |
| Chile    | G6031     | 1              | 0.66 | 0.51 | 0.48  | 0.43  | 0.36  | 0.28  | 0.21  | 0.16  | 0.09  | 0.05  | -0.01 | -0.04 | 0.05  | 0.09  | 0.09  | 0.02  | -0.08 |
| Chile    | G6042     | 1              | 0.79 | 0.62 | 0.54  | 0.48  | 0.42  | 0.39  | 0.38  | 0.37  | 0.33  | 0.34  | 0.30  | 0.32  | 0.27  | 0.28  | 0.27  | 0.29  | 0.24  |
| Chile    | G6043     | 1              | 0.84 | 0.74 | 0.69  | 0.66  | 0.62  | 0.58  | 0.54  | 0.51  | 0.47  | 0.43  | 0.39  | 0.35  | 0.35  | 0.37  | 0.33  | 0.28  | 0.24  |
| Chile    | G6044     | 0              | 0.55 | 0.30 | 0.15  | 0.07  | 0.01  | 0.02  | 0.02  | 0.05  | 0.07  | 0.12  | 0.14  | 0.17  | 0.12  | 0.12  | 0.12  | 0.13  | 0.10  |
| Chile    | G6046     | 1              | 0.99 | 0.96 | 0.93  | 0.91  | 0.89  | 0.86  | 0.83  | 0.82  | 0.80  | 0.76  | 0.73  | 0.67  | 0.64  | 0.60  | 0.58  | 0.52  | 0.47  |
| Chile    | G6057     | 1              | 0.92 | 0.83 | 0.75  | 0.71  | 0.69  | 0.66  | 0.63  | 0.61  | 0.59  | 0.55  | 0.50  | 0.45  | 0.40  | 0.31  | 0.30  | 0.21  | 0.15  |
| Chile    | G6058     | 1              | 1.00 | 0.98 | 0.95  | 0.92  | 0.89  | 0.86  | 0.84  | 0.81  | 0.78  | 0.74  | 0.69  | 0.65  | 0.61  | 0.57  | 0.54  | 0.48  | 0.43  |
| Chile    | G6075     | 0              | 0.92 | 0.89 | 0.87  | 0.85  | 0.83  | 0.80  | 0.78  | 0.75  | 0.73  | 0.70  | 0.67  | 0.62  | 0.56  | 0.52  | 0.47  | 0.39  | 0.32  |
| Chile    | G6076     | 1              | 0.98 | 0.96 | 0.94  | 0.92  | 0.90  | 0.89  | 0.86  | 0.85  | 0.83  | 0.81  | 0.77  | 0.73  | 0.70  | 0.67  | 0.64  | 0.56  | 0.48  |
| Chile    | G6077     | 1              | 0.98 | 0.90 | 0.82  | 0.76  | 0.72  | 0.67  | 0.62  | 0.58  | 0.54  | 0.50  | 0.41  | 0.35  | 0.30  | 0.26  | 0.23  | 0.13  | 0.04  |
| Chile    | G6078     | 1              | 0.97 | 0.93 | 0.89  | 0.86  | 0.83  | 0.81  | 0.78  | 0.76  | 0.73  | 0.70  | 0.65  | 0.62  | 0.60  | 0.57  | 0.56  | 0.50  | 0.47  |
| Chile    | G6080     | 1              | 0.91 | 0.79 | 0.72  | 0.69  | 0.64  | 0.61  | 0.57  | 0.53  | 0.49  | 0.45  | 0.39  | 0.32  | 0.26  | 0.23  | 0.22  | 0.17  | 0.12  |
| Chile    | G6081     | 1              | 0.94 | 0.85 | 0.78  | 0.72  | 0.67  | 0.62  | 0.56  | 0.51  | 0.46  | 0.42  | 0.37  | 0.30  | 0.27  | 0.25  | 0.23  | 0.16  | 0.13  |
| Chile    | G6082     | 1              | 0.89 | 0.80 | 0.74  | 0.69  | 0.64  | 0.58  | 0.54  | 0.48  | 0.42  | 0.38  | 0.31  | 0.25  | 0.24  | 0.23  | 0.21  | 0.16  | 0.12  |
| Colombia | G1150     | 1              | 1.00 | 0.99 | 0.97  | 0.95  | 0.92  | 0.88  | 0.84  | 0.78  | 0.73  | 0.67  | 0.55  | 0.45  | 0.36  | 0.28  | 0.23  | 0.14  | 0.08  |
| Colombia | G1690     | 1              | 1.00 | 0.99 | 0.95  | 0.86  | 0.73  | 0.57  | 0.39  | 0.24  | 0.12  | 0.03  | -0.08 | -0.14 | -0.18 | -0.21 | -0.19 | -0.10 | -0.12 |
| Colombia | G1691     | 1              | 0.76 | 0.28 | 0.01  | -0.11 | -0.18 | -0.21 | -0.22 | -0.24 | -0.23 | -0.24 | -0.27 | -0.28 | -0.33 | -0.48 | -0.52 | -0.59 | -0.58 |
| Colombia | G1692     | 1              | 0.98 | 0.86 | 0.60  | 0.28  | -0.02 | -0.26 | -0.46 | -0.61 | -0.71 | -0.78 | -0.87 | -0.91 | -0.90 | -0.70 | -0.61 | -0.91 | -1.07 |
| Colombia | G1693     | 1              | 0.82 | 0.65 | 0.53  | 0.42  | 0.34  | 0.28  | 0.22  | 0.18  | 0.15  | 0.11  | 0.04  | -0.01 | 0.00  | 0.07  | 0.01  | -0.15 | -0.23 |
| Colombia | G1694     | 1              | 0.84 | 0.64 | 0.52  | 0.43  | 0.38  | 0.33  | 0.29  | 0.25  | 0.23  | 0.19  | 0.13  | 0.08  | 0.09  | 0.11  | 0.02  | -0.17 | -0.25 |
| Colombia | G1695     | 1              | 0.95 | 0.74 | 0.38  | 0.03  | -0.28 | -0.52 | -0.72 | -0.86 | -0.95 | -1.03 | -1.11 | -1.15 | -1.10 | -0.84 | -0.83 | -1.24 | -1.41 |
| Colombia | G1721     | 1              | 0.95 | 0.77 | 0.52  | 0.31  | 0.14  | 0.00  | -0.10 | -0.19 | -0.25 | -0.31 | -0.40 | -0.48 | -0.53 | -0.58 | -0.68 | -0.95 | -1.10 |
| Colombia | G1752     | 1              | 0.97 | 0.87 | 0.73  | 0.60  | 0.49  | 0.42  | 0.37  | 0.32  | 0.28  | 0.23  | 0.17  | 0.13  | 0.12  | 0.09  | 0.08  | 0.05  | 0.05  |
| Colombia | G1753     | 1              | 0.80 | 0.49 | 0.27  | 0.16  | 0.11  | 0.07  | 0.04  | 0.02  | 0.01  | 0.00  | -0.03 | -0.05 | 0.00  | 0.00  | -0.01 | 0.00  | 0.04  |
| Colombia | G1865     | 1              | 1.00 | 0.98 | 0.92  | 0.84  | 0.75  | 0.66  | 0.58  | 0.52  | 0.47  | 0.42  | 0.35  | 0.30  | 0.25  | 0.20  | 0.15  | 0.11  | 0.07  |
| Colombia | G1866     | 1              | 1.00 | 0.99 | 0.95  | 0.90  | 0.84  | 0.77  | 0.71  | 0.65  | 0.59  | 0.54  | 0.46  | 0.39  | 0.33  | 0.27  | 0.23  | 0.19  | 0.15  |
| Colombia | G1983     | 1              | 0.65 | 0.19 | 0.02  | -0.06 | -0.11 | -0.17 | -0.21 | -0.22 | -0.25 | -0.27 | -0.27 | -0.27 | -0.29 | -0.37 | -0.45 | -0.63 | -0.65 |
| Colombia | G1984     | 1              | 0.68 | 0.24 | -0.09 | -0.30 | -0.40 | -0.45 | -0.48 | -0.50 | -0.50 | -0.51 | -0.52 | -0.52 | -0.56 | -0.82 | -1.07 | -1.43 | -1.52 |

| Country  | GloFAS ID | Station filter | LT1  | LT2  | LT3   | LT4   | LT5   | LT6   | LT7   | LT8   | LT9   | LT10  | LT12  | LT14  | LT16  | LT18  | LT20  | LT25  | L30   |
|----------|-----------|----------------|------|------|-------|-------|-------|-------|-------|-------|-------|-------|-------|-------|-------|-------|-------|-------|-------|
| Colombia | G1985     | 1              | 0.78 | 0.37 | 0.04  | -0.19 | -0.35 | -0.44 | -0.48 | -0.49 | -0.51 | -0.51 | -0.50 | -0.49 | -0.54 | -0.85 | -1.17 | -1.62 | -1.73 |
| Colombia | G5017     | 1              | 1.00 | 1.00 | 0.99  | 0.97  | 0.90  | 0.79  | 0.64  | 0.46  | 0.28  | 0.11  | -0.18 | -0.35 | -0.45 | -0.50 | -0.49 | -0.40 | -0.46 |
| Colombia | G5018     | 1              | 0.67 | 0.43 | 0.34  | 0.29  | 0.25  | 0.24  | 0.21  | 0.19  | 0.16  | 0.14  | 0.10  | 0.05  | -0.01 | -0.07 | -0.10 | -0.17 | -0.21 |
| Colombia | G5023     | 1              | 0.99 | 0.96 | 0.88  | 0.75  | 0.58  | 0.41  | 0.26  | 0.15  | 0.07  | 0.02  | -0.04 | -0.08 | -0.12 | -0.13 | -0.08 | -0.02 | -0.05 |
| Colombia | G5052     | 1              | 0.56 | 0.36 | 0.24  | 0.16  | 0.11  | 0.06  | 0.03  | -0.02 | -0.07 | -0.11 | -0.17 | -0.25 | -0.39 | -0.79 | -0.95 | -1.00 | -0.90 |
| Colombia | G5069     | 1              | 0.79 | 0.48 | 0.26  | 0.16  | 0.10  | 0.06  | 0.03  | 0.02  | 0.01  | -0.01 | -0.03 | -0.05 | 0.00  | -0.01 | -0.01 | 0.00  | 0.03  |
| Colombia | G5083     | 1              | 0.46 | 0.10 | -0.05 | -0.14 | -0.20 | -0.22 | -0.24 | -0.25 | -0.26 | -0.27 | -0.29 | -0.31 | -0.43 | -0.50 | -0.54 | -0.58 | -0.56 |
| Colombia | G5085     | 1              | 0.94 | 0.71 | 0.46  | 0.29  | 0.21  | 0.15  | 0.12  | 0.09  | 0.07  | 0.06  | 0.03  | 0.01  | 0.01  | 0.07  | 0.07  | 0.06  | 0.08  |
| Colombia | G5086     | 1              | 0.99 | 0.94 | 0.84  | 0.74  | 0.66  | 0.59  | 0.53  | 0.48  | 0.44  | 0.41  | 0.36  | 0.31  | 0.27  | 0.25  | 0.24  | 0.18  | 0.12  |
| Colombia | G5110     | 1              | 0.99 | 0.97 | 0.94  | 0.90  | 0.86  | 0.81  | 0.75  | 0.69  | 0.63  | 0.58  | 0.48  | 0.39  | 0.31  | 0.25  | 0.21  | 0.12  | 0.05  |
| Colombia | G5113     | 1              | 0.59 | 0.45 | 0.40  | 0.36  | 0.34  | 0.32  | 0.30  | 0.28  | 0.23  | 0.22  | 0.17  | 0.13  | 0.00  | -0.17 | -0.26 | -0.33 | -0.36 |
| Colombia | G5121     | 1              | 0.99 | 0.93 | 0.74  | 0.44  | 0.13  | -0.14 | -0.36 | -0.53 | -0.66 | -0.74 | -0.86 | -0.90 | -0.92 | -0.76 | -0.62 | -0.88 | -1.06 |
| Colombia | G5123     | 1              | 0.99 | 0.95 | 0.91  | 0.86  | 0.80  | 0.74  | 0.67  | 0.60  | 0.54  | 0.48  | 0.38  | 0.30  | 0.23  | 0.18  | 0.14  | 0.06  | -0.01 |
| Colombia | G5129     | 1              | 1.00 | 0.98 | 0.93  | 0.83  | 0.69  | 0.53  | 0.36  | 0.22  | 0.12  | 0.05  | -0.03 | -0.08 | -0.12 | -0.14 | -0.11 | -0.03 | -0.05 |
| Colombia | G5133     | 1              | 0.98 | 0.84 | 0.60  | 0.40  | 0.28  | 0.21  | 0.17  | 0.14  | 0.12  | 0.10  | 0.07  | 0.04  | 0.03  | 0.11  | 0.12  | 0.11  | 0.11  |
| Colombia | G5153     | 1              | 1.00 | 0.99 | 0.97  | 0.94  | 0.91  | 0.87  | 0.83  | 0.78  | 0.74  | 0.68  | 0.57  | 0.47  | 0.39  | 0.33  | 0.28  | 0.20  | 0.14  |
| Colombia | G5154     | 1              | 1.00 | 0.99 | 0.96  | 0.93  | 0.88  | 0.83  | 0.79  | 0.73  | 0.68  | 0.62  | 0.50  | 0.39  | 0.30  | 0.24  | 0.19  | 0.13  | 0.09  |
| Colombia | G5156     | 1              | 1.00 | 0.97 | 0.93  | 0.87  | 0.81  | 0.74  | 0.68  | 0.61  | 0.55  | 0.48  | 0.34  | 0.23  | 0.14  | 0.07  | 0.03  | -0.02 | -0.04 |
| Colombia | G5182     | 0              | 0.60 | 0.44 | 0.40  | 0.37  | 0.35  | 0.30  | 0.28  | 0.26  | 0.22  | 0.20  | 0.15  | 0.12  | 0.02  | -0.06 | -0.08 | -0.11 | -0.13 |
| Colombia | G5241     | 1              | 0.89 | 0.77 | 0.74  | 0.71  | 0.66  | 0.62  | 0.59  | 0.55  | 0.51  | 0.48  | 0.41  | 0.36  | 0.31  | 0.29  | 0.26  | 0.22  | 0.16  |
| Colombia | G5256     | 1              | 0.93 | 0.66 | 0.27  | -0.09 | -0.39 | -0.63 | -0.83 | -0.96 | -1.04 | -1.12 | -1.19 | -1.24 | -1.17 | -0.94 | -0.96 | -1.39 | -1.56 |
| Colombia | G5263     | 1              | 0.87 | 0.52 | 0.15  | -0.16 | -0.39 | -0.54 | -0.63 | -0.68 | -0.70 | -0.72 | -0.72 | -0.70 | -0.68 | -0.83 | -1.10 | -1.58 | -1.72 |
| Colombia | G5265     | 1              | 0.94 | 0.65 | 0.26  | -0.10 | -0.40 | -0.64 | -0.84 | -0.96 | -1.04 | -1.12 | -1.19 | -1.23 | -1.17 | -0.94 | -0.97 | -1.40 | -1.56 |
| Colombia | G5270     | 1              | 0.93 | 0.60 | 0.20  | -0.17 | -0.46 | -0.70 | -0.89 | -1.01 | -1.09 | -1.16 | -1.22 | -1.27 | -1.21 | -0.99 | -1.05 | -1.49 | -1.66 |
| Colombia | G5282     | 1              | 0.88 | 0.52 | 0.15  | -0.13 | -0.34 | -0.47 | -0.55 | -0.58 | -0.60 | -0.61 | -0.61 | -0.60 | -0.60 | -0.82 | -1.12 | -1.61 | -1.73 |
| Colombia | G5288     | 1              | 0.98 | 0.86 | 0.59  | 0.26  | -0.03 | -0.27 | -0.46 | -0.61 | -0.71 | -0.77 | -0.86 | -0.90 | -0.88 | -0.67 | -0.59 | -0.89 | -1.04 |
| Colombia | G5291     | 1              | 0.97 | 0.81 | 0.48  | 0.12  | -0.19 | -0.45 | -0.66 | -0.81 | -0.91 | -0.99 | -1.08 | -1.13 | -1.10 | -0.85 | -0.79 | -1.20 | -1.39 |
| Colombia | G5300     | 1              | 0.69 | 0.22 | -0.19 | -0.52 | -0.79 | -1.00 | -1.13 | -1.20 | -1.27 | -1.31 | -1.34 | -1.36 | -1.27 | -1.15 | -1.35 | -1.77 | -1.93 |
| Colombia | G5306     | 1              | 0.52 | 0.00 | -0.45 | -0.80 | -1.08 | -1.28 | -1.40 | -1.47 | -1.51 | -1.54 | -1.56 | -1.56 | -1.54 | -1.58 | -1.86 | -2.31 | -2.49 |
| Colombia | G5307     | 1              | 0.60 | 0.09 | -0.35 | -0.71 | -0.99 | -1.20 | -1.33 | -1.41 | -1.47 | -1.50 | -1.52 | -1.53 | -1.47 | -1.44 | -1.70 | -2.14 | -2.32 |
| Colombia | G5308     | 1              | 0.65 | 0.16 | -0.27 | -0.62 | -0.90 | -1.11 | -1.25 | -1.32 | -1.39 | -1.43 | -1.46 | -1.47 | -1.40 | -1.33 | -1.55 | -1.98 | -2.16 |
| Colombia | G5328     | 1              | 0.99 | 0.98 | 0.95  | 0.92  | 0.89  | 0.85  | 0.81  | 0.76  | 0.70  | 0.64  | 0.50  | 0.35  | 0.23  | 0.14  | 0.06  | -0.07 | -0.13 |
| Colombia | G5333     | 1              | 0.99 | 0.96 | 0.92  | 0.88  | 0.83  | 0.77  | 0.71  | 0.65  | 0.59  | 0.53  | 0.43  | 0.36  | 0.30  | 0.26  | 0.22  | 0.13  | 0.06  |
| Colombia | G5335     | 1              | 1.00 | 0.99 | 0.98  | 0.97  | 0.95  | 0.93  | 0.91  | 0.89  | 0.86  | 0.83  | 0.76  | 0.70  | 0.65  | 0.59  | 0.54  | 0.42  | 0.28  |
| Colombia | G5383     | 1              | 0.80 | 0.39 | 0.04  | -0.21 | -0.38 | -0.49 | -0.53 | -0.55 | -0.57 | -0.57 | -0.56 | -0.55 | -0.58 | -0.88 | -1.19 | -1.66 | -1.77 |
| Colombia | G5401     | 1              | 0.86 | 0.42 | 0.01  | -0.35 | -0.63 | -0.86 | -1.02 | -1.12 | -1.19 | -1.25 | -1.29 | -1.33 | -1.26 | -1.07 | -1.20 | -1.64 | -1.79 |
| Colombia | G5405     | 1              | 0.83 | 0.38 | -0.04 | -0.39 | -0.67 | -0.89 | -1.05 | -1.14 | -1.21 | -1.26 | -1.30 | -1.34 | -1.26 | -1.08 | -1.23 | -1.66 | -1.82 |
| Colombia | G5437     | 1              | 0.59 | 0.20 | 0.10  | 0.04  | -0.01 | -0.07 | -0.10 | -0.12 | -0.15 | -0.17 | -0.18 | -0.17 | -0.21 | -0.26 | -0.32 | -0.44 | -0.46 |
| Colombia | G5438     | 1              | 0.59 | 0.20 | 0.13  | 0.06  | 0.00  | -0.04 | -0.08 | -0.11 | -0.13 | -0.16 | -0.19 | -0.19 | -0.20 | -0.22 | -0.24 | -0.29 | -0.29 |

| Country            | GloFAS ID | Station filter | LT1  | LT2  | LT3   | LT4   | LT5   | LT6   | LT7   | LT8   | LT9   | LT10  | LT12  | LT14  | LT16  | LT18  | LT20  | LT25  | L30   |
|--------------------|-----------|----------------|------|------|-------|-------|-------|-------|-------|-------|-------|-------|-------|-------|-------|-------|-------|-------|-------|
| Colombia           | G5668     | 1              | 0.42 | 0.16 | 0.12  | 0.05  | -0.01 | -0.04 | -0.09 | -0.11 | -0.13 | -0.16 | -0.19 | -0.19 | -0.22 | -0.26 | -0.29 | -0.36 | -0.36 |
| Colombia           | G5685     | 1              | 0.30 | 0.11 | 0.07  | -0.02 | -0.08 | -0.11 | -0.16 | -0.17 | -0.20 | -0.22 | -0.24 | -0.23 | -0.30 | -0.38 | -0.43 | -0.51 | -0.52 |
| Colombia           | G5689     | 1              | 0.42 | 0.16 | 0.12  | 0.05  | -0.01 | -0.04 | -0.09 | -0.11 | -0.13 | -0.16 | -0.19 | -0.19 | -0.22 | -0.26 | -0.29 | -0.36 | -0.36 |
| Colombia           | G5965     | 1              | 0.95 | 0.74 | 0.50  | 0.33  | 0.24  | 0.18  | 0.15  | 0.12  | 0.10  | 0.09  | 0.06  | 0.04  | 0.04  | 0.08  | 0.08  | 0.07  | 0.08  |
| Colombia           | G6113     | 1              | 1.00 | 1.00 | 1.00  | 0.99  | 0.99  | 0.96  | 0.92  | 0.83  | 0.70  | 0.55  | 0.22  | -0.07 | -0.28 | -0.40 | -0.46 | -0.43 | -0.42 |
| Colombia           | G6114     | 1              | 1.00 | 1.00 | 1.00  | 0.99  | 0.96  | 0.91  | 0.80  | 0.66  | 0.50  | 0.32  | 0.00  | -0.24 | -0.38 | -0.46 | -0.49 | -0.40 | -0.44 |
| Colombia           | G6115     | 1              | 0.99 | 0.93 | 0.81  | 0.64  | 0.46  | 0.29  | 0.18  | 0.10  | 0.06  | 0.03  | -0.02 | -0.05 | -0.08 | -0.08 | -0.01 | 0.01  | -0.01 |
| Colombia           | G6116     | 1              | 0.99 | 0.93 | 0.76  | 0.54  | 0.38  | 0.28  | 0.22  | 0.19  | 0.17  | 0.15  | 0.12  | 0.08  | 0.06  | 0.11  | 0.14  | 0.12  | 0.12  |
| Colombia           | G6117     | 1              | 0.79 | 0.29 | 0.03  | -0.09 | -0.17 | -0.20 | -0.21 | -0.23 | -0.23 | -0.25 | -0.27 | -0.28 | -0.33 | -0.46 | -0.49 | -0.55 | -0.54 |
| Colombia           | G6118     | 1              | 0.84 | 0.60 | 0.48  | 0.42  | 0.38  | 0.36  | 0.33  | 0.30  | 0.27  | 0.26  | 0.20  | 0.16  | 0.12  | 0.08  | 0.05  | -0.01 | -0.05 |
| Colombia           | G6119     | 1              | 0.90 | 0.70 | 0.63  | 0.60  | 0.56  | 0.53  | 0.50  | 0.47  | 0.44  | 0.41  | 0.36  | 0.30  | 0.26  | 0.24  | 0.21  | 0.15  | 0.10  |
| Colombia           | G6120     | 1              | 0.43 | 0.27 | 0.22  | 0.18  | 0.16  | 0.14  | 0.13  | 0.11  | 0.08  | 0.08  | 0.04  | 0.03  | 0.02  | 0.05  | 0.03  | 0.02  | 0.00  |
| Colombia           | G6121     | 1              | 0.44 | 0.29 | 0.24  | 0.18  | 0.14  | 0.11  | 0.10  | 0.07  | 0.03  | 0.03  | -0.01 | -0.02 | -0.07 | -0.32 | -0.42 | -0.36 | -0.27 |
| Colombia           | G6122     | 1              | 0.56 | 0.35 | 0.23  | 0.14  | 0.09  | 0.03  | 0.00  | -0.05 | -0.09 | -0.13 | -0.19 | -0.26 | -0.41 | -0.86 | -1.05 | -1.11 | -1.01 |
| Dominican Republic | G1698     | 1              | 0.83 | 0.62 | 0.51  | 0.43  | 0.39  | 0.36  | 0.31  | 0.29  | 0.26  | 0.25  | 0.21  | 0.19  | 0.18  | 0.19  | 0.21  | 0.20  | 0.18  |
| Dominican Republic | G1699     | 1              | 0.94 | 0.77 | 0.63  | 0.53  | 0.45  | 0.40  | 0.36  | 0.31  | 0.28  | 0.26  | 0.21  | 0.18  | 0.17  | 0.17  | 0.18  | 0.17  | 0.17  |
| Dominican Republic | G1700     | 0              | 0.67 | 0.53 | 0.49  | 0.43  | 0.39  | 0.38  | 0.32  | 0.31  | 0.30  | 0.29  | 0.27  | 0.25  | 0.23  | 0.18  | 0.16  | 0.14  | 0.12  |
| Dominican Republic | G1701     | 1              | 0.78 | 0.57 | 0.48  | 0.40  | 0.39  | 0.36  | 0.33  | 0.31  | 0.28  | 0.27  | 0.25  | 0.22  | 0.22  | 0.23  | 0.24  | 0.22  | 0.21  |
| Dominican Republic | G1702     | 1              | 0.84 | 0.63 | 0.52  | 0.44  | 0.40  | 0.36  | 0.32  | 0.30  | 0.27  | 0.25  | 0.21  | 0.19  | 0.18  | 0.20  | 0.21  | 0.20  | 0.18  |
| Dominican Republic | G1703     | 1              | 0.85 | 0.63 | 0.50  | 0.41  | 0.35  | 0.31  | 0.26  | 0.23  | 0.21  | 0.19  | 0.14  | 0.12  | 0.12  | 0.14  | 0.15  | 0.15  | 0.12  |
| Dominican Republic | G1704     | 1              | 0.88 | 0.67 | 0.54  | 0.46  | 0.41  | 0.38  | 0.33  | 0.30  | 0.27  | 0.25  | 0.21  | 0.19  | 0.18  | 0.19  | 0.20  | 0.19  | 0.18  |
| Dominican Republic | G1705     | 0              | 0.76 | 0.52 | 0.39  | 0.29  | 0.23  | 0.20  | 0.16  | 0.12  | 0.10  | 0.08  | 0.04  | 0.03  | 0.03  | 0.06  | 0.08  | 0.07  | 0.04  |
| Dominican Republic | G1706     | 0              | 0.74 | 0.51 | 0.39  | 0.29  | 0.25  | 0.22  | 0.18  | 0.14  | 0.12  | 0.10  | 0.06  | 0.05  | 0.05  | 0.08  | 0.09  | 0.09  | 0.06  |
| Dominican Republic | G1707     | 1              | 0.81 | 0.57 | 0.44  | 0.35  | 0.28  | 0.25  | 0.20  | 0.17  | 0.15  | 0.13  | 0.08  | 0.07  | 0.06  | 0.10  | 0.12  | 0.11  | 0.09  |
| Ecuador            | G1135     | 1              | 0.64 | 0.11 | -0.21 | -0.32 | -0.35 | -0.35 | -0.33 | -0.35 | -0.33 | -0.31 | -0.32 | -0.29 | -0.29 | -0.22 | -0.18 | -0.20 | -0.29 |
| Ecuador            | G5327     | 1              | 0.91 | 0.70 | 0.56  | 0.46  | 0.40  | 0.36  | 0.33  | 0.29  | 0.26  | 0.24  | 0.22  | 0.20  | 0.16  | 0.10  | 0.06  | 0.05  | 0.04  |
| Ecuador            | G5336     | 1              | 0.68 | 0.53 | 0.51  | 0.47  | 0.45  | 0.41  | 0.40  | 0.37  | 0.34  | 0.30  | 0.27  | 0.24  | 0.20  | 0.13  | 0.13  | 0.12  | 0.09  |
| Ecuador            | G5423     | 1              | 0.98 | 0.89 | 0.75  | 0.59  | 0.45  | 0.34  | 0.26  | 0.20  | 0.16  | 0.12  | 0.09  | 0.06  | 0.04  | 0.03  | 0.00  | -0.12 | -0.22 |
| French Guyana      | G1110     | 1              | 0.99 | 0.98 | 0.94  | 0.89  | 0.83  | 0.76  | 0.70  | 0.65  | 0.60  | 0.55  | 0.48  | 0.41  | 0.36  | 0.31  | 0.26  | 0.17  | 0.11  |
| French Guyana      | G5138     | 1              | 0.99 | 0.96 | 0.91  | 0.85  | 0.78  | 0.72  | 0.67  | 0.62  | 0.57  | 0.53  | 0.46  | 0.41  | 0.36  | 0.31  | 0.27  | 0.19  | 0.14  |
| French Guyana      | G5143     | 1              | 1.00 | 0.97 | 0.92  | 0.86  | 0.79  | 0.71  | 0.65  | 0.59  | 0.53  | 0.48  | 0.40  | 0.33  | 0.27  | 0.22  | 0.17  | 0.07  | 0.00  |
| French Guyana      | G5168     | 1              | 0.99 | 0.95 | 0.89  | 0.82  | 0.74  | 0.66  | 0.60  | 0.54  | 0.47  | 0.42  | 0.32  | 0.24  | 0.17  | 0.10  | 0.03  | -0.09 | -0.17 |
| Guyana             | G1094     | 1              | 0.99 | 0.98 | 0.97  | 0.95  | 0.92  | 0.89  | 0.85  | 0.79  | 0.74  | 0.68  | 0.56  | 0.46  | 0.37  | 0.30  | 0.24  | 0.19  | 0.15  |
| Guyana             | G1095     | 1              | 0.98 | 0.94 | 0.88  | 0.80  | 0.75  | 0.70  | 0.65  | 0.60  | 0.56  | 0.53  | 0.46  | 0.41  | 0.36  | 0.32  | 0.29  | 0.20  | 0.11  |
| Guyana             | G1104     | 1              | 0.99 | 0.96 | 0.92  | 0.88  | 0.84  | 0.79  | 0.73  | 0.68  | 0.62  | 0.56  | 0.46  | 0.36  | 0.27  | 0.19  | 0.12  | -0.05 | -0.18 |
| Guyana             | G5104     | 1              | 0.99 | 0.98 | 0.95  | 0.92  | 0.88  | 0.84  | 0.80  | 0.75  | 0.70  | 0.66  | 0.59  | 0.52  | 0.46  | 0.41  | 0.37  | 0.27  | 0.19  |
| Guyana             | G5150     | 1              | 0.99 | 0.97 | 0.94  | 0.89  | 0.84  | 0.77  | 0.69  | 0.62  | 0.55  | 0.48  | 0.37  | 0.27  | 0.18  | 0.11  | 0.03  | -0.12 | -0.24 |
| Guyana             | G5155     | 1              | 0.99 | 0.96 | 0.91  | 0.85  | 0.78  | 0.71  | 0.65  | 0.59  | 0.54  | 0.50  | 0.41  | 0.34  | 0.28  | 0.21  | 0.14  | -0.01 | -0.13 |
| Guyana             | G5169     | 1              | 0.99 | 0.96 | 0.90  | 0.81  | 0.73  | 0.64  | 0.56  | 0.49  | 0.43  | 0.37  | 0.27  | 0.19  | 0.11  | 0.04  | -0.01 | -0.15 | -0.23 |

| Country   | GloFAS ID | Station filter | LT1  | LT2  | LT3  | LT4  | LT5  | LT6  | LT7  | LT8  | LT9  | LT10 | LT12 | LT14 | LT16 | LT18 | LT20 | LT25 | L30  |
|-----------|-----------|----------------|------|------|------|------|------|------|------|------|------|------|------|------|------|------|------|------|------|
| Nicaragua | G1054     | 1              | 0.98 | 0.91 | 0.84 | 0.80 | 0.76 | 0.73 | 0.71 | 0.69 | 0.65 | 0.63 | 0.58 | 0.53 | 0.49 | 0.49 | 0.48 | 0.43 | 0.39 |
| Nicaragua | G1696     | 1              | 0.91 | 0.79 | 0.71 | 0.61 | 0.60 | 0.60 | 0.52 | 0.51 | 0.52 | 0.50 | 0.44 | 0.38 | 0.39 | 0.34 | 0.36 | 0.30 | 0.32 |
| Nicaragua | G1697     | 1              | 0.84 | 0.74 | 0.66 | 0.59 | 0.60 | 0.58 | 0.50 | 0.52 | 0.53 | 0.50 | 0.45 | 0.38 | 0.41 | 0.35 | 0.39 | 0.32 | 0.36 |
| Nicaragua | G1789     | 1              | 0.94 | 0.76 | 0.60 | 0.52 | 0.46 | 0.40 | 0.36 | 0.34 | 0.29 | 0.24 | 0.20 | 0.16 | 0.13 | 0.15 | 0.16 | 0.11 | 0.09 |
| Panama    | G1069     | 1              | 0.96 | 0.90 | 0.86 | 0.83 | 0.80 | 0.76 | 0.73 | 0.70 | 0.67 | 0.64 | 0.58 | 0.52 | 0.47 | 0.43 | 0.39 | 0.32 | 0.27 |
| Paraguay  | G1411     | 1              | 1.00 | 1.00 | 0.99 | 0.99 | 0.98 | 0.97 | 0.96 | 0.94 | 0.92 | 0.89 | 0.83 | 0.77 | 0.71 | 0.66 | 0.61 | 0.50 | 0.42 |
| Paraguay  | G1852     | 1              | 1.00 | 0.99 | 0.97 | 0.94 | 0.90 | 0.85 | 0.80 | 0.75 | 0.69 | 0.65 | 0.57 | 0.50 | 0.45 | 0.39 | 0.35 | 0.26 | 0.19 |
| Paraguay  | G1853     | 1              | 1.00 | 0.98 | 0.96 | 0.91 | 0.85 | 0.79 | 0.74 | 0.68 | 0.63 | 0.59 | 0.52 | 0.46 | 0.41 | 0.37 | 0.32 | 0.24 | 0.18 |
| Paraguay  | G1854     | 1              | 1.00 | 0.99 | 0.99 | 0.98 | 0.96 | 0.95 | 0.93 | 0.91 | 0.90 | 0.88 | 0.83 | 0.79 | 0.73 | 0.69 | 0.64 | 0.54 | 0.46 |
| Paraguay  | G5815     | 1              | 1.00 | 1.00 | 1.00 | 0.99 | 0.99 | 0.98 | 0.95 | 0.91 | 0.88 | 0.85 | 0.75 | 0.67 | 0.56 | 0.47 | 0.38 | 0.21 | 0.10 |
| Paraguay  | G5824     | 1              | 1.00 | 1.00 | 0.99 | 0.98 | 0.97 | 0.93 | 0.88 | 0.83 | 0.79 | 0.74 | 0.64 | 0.54 | 0.43 | 0.34 | 0.26 | 0.13 | 0.03 |
| Paraguay  | G5825     | 1              | 1.00 | 1.00 | 1.00 | 0.99 | 0.99 | 0.98 | 0.96 | 0.94 | 0.92 | 0.89 | 0.83 | 0.76 | 0.68 | 0.59 | 0.50 | 0.29 | 0.13 |
| Paraguay  | G5831     | 1              | 1.00 | 1.00 | 0.99 | 0.99 | 0.98 | 0.98 | 0.96 | 0.95 | 0.93 | 0.90 | 0.85 | 0.78 | 0.70 | 0.62 | 0.53 | 0.31 | 0.15 |
| Paraguay  | G5852     | 1              | 0.99 | 0.95 | 0.90 | 0.85 | 0.79 | 0.74 | 0.70 | 0.64 | 0.61 | 0.58 | 0.51 | 0.46 | 0.40 | 0.36 | 0.32 | 0.23 | 0.19 |
| Paraguay  | G5855     | 1              | 0.95 | 0.84 | 0.77 | 0.71 | 0.63 | 0.58 | 0.53 | 0.47 | 0.44 | 0.41 | 0.35 | 0.33 | 0.28 | 0.28 | 0.24 | 0.22 | 0.19 |
| Paraguay  | G5868     | 1              | 1.00 | 0.99 | 0.97 | 0.93 | 0.87 | 0.80 | 0.74 | 0.68 | 0.62 | 0.57 | 0.50 | 0.43 | 0.38 | 0.36 | 0.33 | 0.29 | 0.26 |
| Paraguay  | G5869     | 1              | 1.00 | 0.99 | 0.98 | 0.97 | 0.96 | 0.95 | 0.94 | 0.92 | 0.90 | 0.88 | 0.83 | 0.78 | 0.72 | 0.67 | 0.62 | 0.51 | 0.44 |
| Paraguay  | G5878     | 1              | 1.00 | 1.00 | 0.99 | 0.98 | 0.97 | 0.96 | 0.95 | 0.93 | 0.91 | 0.89 | 0.84 | 0.79 | 0.74 | 0.69 | 0.64 | 0.53 | 0.45 |
| Paraguay  | G5882     | 1              | 1.00 | 0.99 | 0.99 | 0.98 | 0.97 | 0.96 | 0.94 | 0.93 | 0.91 | 0.89 | 0.84 | 0.79 | 0.74 | 0.69 | 0.64 | 0.53 | 0.45 |
| Paraguay  | G5883     | 1              | 0.99 | 0.96 | 0.92 | 0.88 | 0.84 | 0.80 | 0.76 | 0.70 | 0.66 | 0.62 | 0.53 | 0.46 | 0.39 | 0.36 | 0.34 | 0.27 | 0.22 |
| Paraguay  | G5900     | 1              | 1.00 | 0.98 | 0.97 | 0.94 | 0.88 | 0.83 | 0.79 | 0.76 | 0.71 | 0.68 | 0.63 | 0.61 | 0.58 | 0.55 | 0.54 | 0.52 | 0.50 |
| Paraguay  | G5918     | 1              | 1.00 | 0.99 | 0.98 | 0.97 | 0.95 | 0.94 | 0.92 | 0.90 | 0.88 | 0.86 | 0.82 | 0.77 | 0.70 | 0.64 | 0.58 | 0.44 | 0.34 |
| Paraguay  | G5928     | 1              | 1.00 | 1.00 | 1.00 | 0.99 | 0.99 | 0.99 | 0.98 | 0.98 | 0.97 | 0.97 | 0.95 | 0.94 | 0.92 | 0.90 | 0.87 | 0.81 | 0.75 |
| Paraguay  | G5947     | 1              | 1.00 | 0.99 | 0.98 | 0.95 | 0.92 | 0.88 | 0.84 | 0.79 | 0.74 | 0.69 | 0.61 | 0.54 | 0.47 | 0.42 | 0.37 | 0.27 | 0.20 |
| Peru      | G1182     | 1              | 0.99 | 0.97 | 0.94 | 0.90 | 0.87 | 0.82 | 0.77 | 0.71 | 0.65 | 0.58 | 0.46 | 0.37 | 0.31 | 0.26 | 0.23 | 0.17 | 0.12 |
| Peru      | G1193     | 1              | 0.99 | 0.93 | 0.83 | 0.71 | 0.58 | 0.46 | 0.36 | 0.27 | 0.21 | 0.16 | 0.10 | 0.08 | 0.08 | 0.07 | 0.06 | 0.05 | 0.04 |
| Peru      | G1867     | 1              | 1.00 | 0.99 | 0.98 | 0.96 | 0.94 | 0.91 | 0.88 | 0.85 | 0.81 | 0.76 | 0.66 | 0.55 | 0.46 | 0.39 | 0.34 | 0.24 | 0.18 |
| Peru      | G1869     | 1              | 1.00 | 0.99 | 0.99 | 0.98 | 0.97 | 0.95 | 0.93 | 0.91 | 0.87 | 0.82 | 0.69 | 0.54 | 0.42 | 0.33 | 0.25 | 0.16 | 0.12 |
| Peru      | G1870     | 1              | 1.00 | 0.99 | 0.98 | 0.97 | 0.95 | 0.93 | 0.89 | 0.85 | 0.81 | 0.76 | 0.65 | 0.55 | 0.47 | 0.42 | 0.38 | 0.29 | 0.21 |
| Peru      | G1871     | 1              | 1.00 | 0.99 | 0.98 | 0.96 | 0.93 | 0.90 | 0.86 | 0.81 | 0.75 | 0.69 | 0.57 | 0.48 | 0.42 | 0.38 | 0.34 | 0.26 | 0.19 |
| Peru      | G1872     | 1              | 1.00 | 1.00 | 0.99 | 0.99 | 0.99 | 0.98 | 0.97 | 0.97 | 0.96 | 0.95 | 0.93 | 0.91 | 0.87 | 0.83 | 0.78 | 0.61 | 0.49 |
| Peru      | G1875     | 1              | 0.99 | 0.94 | 0.89 | 0.82 | 0.74 | 0.66 | 0.58 | 0.52 | 0.47 | 0.44 | 0.39 | 0.36 | 0.31 | 0.27 | 0.24 | 0.17 | 0.12 |
| Peru      | G1876     | 1              | 1.00 | 0.99 | 0.98 | 0.97 | 0.95 | 0.93 | 0.91 | 0.88 | 0.86 | 0.83 | 0.77 | 0.70 | 0.64 | 0.58 | 0.52 | 0.40 | 0.29 |
| Peru      | G5249     | 1              | 0.98 | 0.89 | 0.79 | 0.71 | 0.66 | 0.62 | 0.58 | 0.55 | 0.54 | 0.52 | 0.49 | 0.45 | 0.44 | 0.40 | 0.40 | 0.37 | 0.35 |
| Peru      | G5334     | 1              | 1.00 | 0.99 | 0.97 | 0.96 | 0.94 | 0.92 | 0.90 | 0.88 | 0.86 | 0.84 | 0.79 | 0.74 | 0.68 | 0.60 | 0.52 | 0.36 | 0.24 |
| Peru      | G5378     | 1              | 1.00 | 0.99 | 0.99 | 0.98 | 0.97 | 0.96 | 0.95 | 0.93 | 0.91 | 0.89 | 0.85 | 0.81 | 0.76 | 0.71 | 0.66 | 0.50 | 0.35 |
| Peru      | G5389     | 1              | 0.99 | 0.95 | 0.90 | 0.84 | 0.78 | 0.73 | 0.67 | 0.62 | 0.58 | 0.55 | 0.48 | 0.44 | 0.40 | 0.37 | 0.34 | 0.27 | 0.21 |
| Peru      | G5393     | 1              | 0.98 | 0.92 | 0.85 | 0.77 | 0.70 | 0.63 | 0.58 | 0.55 | 0.52 | 0.49 | 0.45 | 0.41 | 0.38 | 0.36 | 0.33 | 0.26 | 0.19 |
| Peru      | G5394     | 1              | 0.97 | 0.91 | 0.81 | 0.71 | 0.62 | 0.54 | 0.47 | 0.42 | 0.38 | 0.35 | 0.30 | 0.27 | 0.25 | 0.21 | 0.18 | 0.11 | 0.03 |

| Country | GloFAS ID | Station filter | LT1  | LT2   | LT3   | LT4   | LT5   | LT6   | LT7   | LT8   | LT9   | LT10  | LT12  | LT14  | LT16  | LT18  | LT20  | LT25  | L30   |
|---------|-----------|----------------|------|-------|-------|-------|-------|-------|-------|-------|-------|-------|-------|-------|-------|-------|-------|-------|-------|
| Peru    | G5395     | 1              | 1.00 | 1.00  | 0.99  | 0.98  | 0.98  | 0.97  | 0.96  | 0.95  | 0.93  | 0.92  | 0.89  | 0.84  | 0.79  | 0.72  | 0.66  | 0.51  | 0.40  |
| Peru    | G5417     | 1              | 0.88 | 0.71  | 0.67  | 0.62  | 0.58  | 0.55  | 0.51  | 0.50  | 0.47  | 0.44  | 0.38  | 0.31  | 0.28  | 0.21  | 0.18  | 0.12  | 0.06  |
| Peru    | G5418     | 1              | 0.99 | 0.97  | 0.94  | 0.91  | 0.87  | 0.82  | 0.77  | 0.71  | 0.66  | 0.62  | 0.54  | 0.47  | 0.42  | 0.39  | 0.36  | 0.28  | 0.21  |
| Peru    | G5419     | 1              | 1.00 | 0.99  | 0.99  | 0.98  | 0.98  | 0.97  | 0.96  | 0.96  | 0.95  | 0.94  | 0.92  | 0.89  | 0.87  | 0.83  | 0.80  | 0.69  | 0.57  |
| Peru    | G5424     | 1              | 1.00 | 0.99  | 0.98  | 0.97  | 0.95  | 0.94  | 0.92  | 0.90  | 0.87  | 0.85  | 0.78  | 0.68  | 0.57  | 0.48  | 0.40  | 0.27  | 0.21  |
| Peru    | G5426     | 1              | 1.00 | 0.99  | 0.99  | 0.98  | 0.97  | 0.96  | 0.94  | 0.92  | 0.90  | 0.87  | 0.77  | 0.64  | 0.52  | 0.41  | 0.33  | 0.21  | 0.15  |
| Peru    | G5427     | 1              | 1.00 | 0.99  | 0.99  | 0.99  | 0.98  | 0.97  | 0.96  | 0.95  | 0.94  | 0.93  | 0.91  | 0.89  | 0.87  | 0.85  | 0.81  | 0.69  | 0.56  |
| Peru    | G5429     | 1              | 0.99 | 0.97  | 0.93  | 0.89  | 0.85  | 0.81  | 0.77  | 0.72  | 0.67  | 0.61  | 0.50  | 0.41  | 0.35  | 0.31  | 0.27  | 0.17  | 0.11  |
| Peru    | G5433     | 1              | 0.97 | 0.85  | 0.69  | 0.55  | 0.43  | 0.34  | 0.28  | 0.22  | 0.18  | 0.15  | 0.10  | 0.06  | 0.03  | 0.04  | 0.07  | 0.08  | 0.05  |
| Peru    | G5447     | 1              | 1.00 | 1.00  | 0.99  | 0.97  | 0.95  | 0.91  | 0.85  | 0.78  | 0.71  | 0.64  | 0.52  | 0.42  | 0.35  | 0.30  | 0.26  | 0.21  | 0.18  |
| Peru    | G5451     | 1              | 0.84 | 0.53  | 0.28  | 0.13  | 0.03  | -0.03 | -0.05 | -0.08 | -0.10 | -0.11 | -0.13 | -0.11 | -0.10 | -0.08 | -0.12 | -0.19 | -0.23 |
| Peru    | G5452     | 1              | 0.99 | 0.97  | 0.94  | 0.91  | 0.87  | 0.82  | 0.78  | 0.74  | 0.69  | 0.66  | 0.59  | 0.53  | 0.48  | 0.44  | 0.40  | 0.32  | 0.27  |
| Peru    | G5469     | 1              | 0.71 | 0.54  | 0.48  | 0.42  | 0.38  | 0.35  | 0.30  | 0.28  | 0.25  | 0.21  | 0.18  | 0.13  | 0.11  | 0.04  | 0.02  | -0.05 | -0.06 |
| Peru    | G5515     | 1              | 0.78 | 0.47  | 0.27  | 0.17  | 0.10  | 0.08  | 0.06  | 0.04  | 0.02  | 0.02  | 0.00  | 0.00  | 0.00  | 0.00  | -0.03 | -0.09 | -0.12 |
| Peru    | G5516     | 1              | 0.81 | 0.52  | 0.28  | 0.10  | 0.02  | -0.02 | -0.05 | -0.05 | -0.05 | -0.06 | -0.03 | -0.02 | -0.01 | -0.03 | -0.01 | 0.00  | 0.01  |
| Peru    | G5548     | 1              | 0.99 | 0.94  | 0.81  | 0.65  | 0.48  | 0.34  | 0.24  | 0.17  | 0.12  | 0.09  | 0.06  | 0.05  | 0.04  | 0.06  | 0.08  | 0.07  | 0.05  |
| Peru    | G5580     | 1              | 0.91 | 0.76  | 0.29  | -0.50 | -1.29 | -1.81 | -2.05 | -2.10 | -2.03 | -1.90 | -1.52 | -1.15 | -0.81 | -0.76 | -0.87 | -0.49 | -0.11 |
| Peru    | G5584     | 1              | 0.98 | 0.92  | 0.83  | 0.72  | 0.61  | 0.52  | 0.45  | 0.41  | 0.38  | 0.35  | 0.29  | 0.24  | 0.19  | 0.15  | 0.12  | 0.06  | 0.03  |
| Peru    | G5594     | 1              | 0.91 | 0.74  | 0.58  | 0.44  | 0.33  | 0.26  | 0.22  | 0.20  | 0.18  | 0.17  | 0.12  | 0.09  | 0.07  | 0.06  | 0.04  | 0.01  | 0.01  |
| Peru    | G5598     | 1              | 0.96 | 0.83  | 0.69  | 0.59  | 0.51  | 0.47  | 0.44  | 0.41  | 0.38  | 0.36  | 0.29  | 0.24  | 0.20  | 0.17  | 0.13  | 0.09  | 0.06  |
| Peru    | G5617     | 1              | 0.94 | 0.88  | 0.81  | 0.74  | 0.67  | 0.59  | 0.52  | 0.46  | 0.40  | 0.35  | 0.26  | 0.18  | 0.11  | 0.09  | 0.09  | 0.06  | 0.03  |
| Peru    | G5618     | 1              | 0.96 | 0.90  | 0.87  | 0.83  | 0.78  | 0.74  | 0.70  | 0.67  | 0.64  | 0.60  | 0.50  | 0.42  | 0.35  | 0.29  | 0.25  | 0.14  | 0.08  |
| Peru    | G5620     | 1              | 0.99 | 0.94  | 0.86  | 0.76  | 0.66  | 0.57  | 0.49  | 0.41  | 0.34  | 0.27  | 0.16  | 0.07  | 0.00  | -0.04 | -0.08 | -0.11 | -0.12 |
| Peru    | G5625     | 1              | 1.00 | 0.98  | 0.91  | 0.79  | 0.68  | 0.57  | 0.47  | 0.39  | 0.34  | 0.29  | 0.21  | 0.16  | 0.13  | 0.08  | 0.03  | -0.07 | -0.16 |
| Peru    | G5631     | 1              | 1.00 | 0.96  | 0.88  | 0.75  | 0.61  | 0.46  | 0.34  | 0.25  | 0.18  | 0.13  | 0.06  | 0.01  | 0.00  | -0.02 | -0.02 | -0.07 | -0.14 |
| Peru    | G5632     | 1              | 0.99 | 0.97  | 0.91  | 0.82  | 0.73  | 0.66  | 0.60  | 0.54  | 0.50  | 0.46  | 0.39  | 0.32  | 0.26  | 0.22  | 0.19  | 0.14  | 0.09  |
| Peru    | G5636     | 1              | 0.99 | 0.86  | 0.68  | 0.54  | 0.47  | 0.41  | 0.37  | 0.35  | 0.33  | 0.29  | 0.23  | 0.18  | 0.14  | 0.08  | 0.04  | -0.06 | -0.12 |
| Peru    | G5639     | 1              | 0.83 | 0.60  | 0.40  | 0.24  | 0.13  | 0.05  | -0.04 | -0.10 | -0.14 | -0.19 | -0.26 | -0.34 | -0.38 | -0.31 | -0.26 | -0.33 | -0.42 |
| Peru    | G5640     | 1              | 0.93 | 0.80  | 0.71  | 0.65  | 0.59  | 0.55  | 0.50  | 0.46  | 0.43  | 0.40  | 0.33  | 0.27  | 0.22  | 0.20  | 0.18  | 0.13  | 0.14  |
| Peru    | G5688     | 1              | 0.84 | 0.63  | 0.04  | -0.83 | -1.41 | -1.69 | -1.73 | -1.70 | -1.64 | -1.55 | -1.30 | -1.08 | -0.84 | -0.95 | -1.44 | -1.14 | -0.64 |
| Peru    | G6091     | 1              | 0.95 | 0.83  | 0.70  | 0.58  | 0.49  | 0.41  | 0.34  | 0.28  | 0.24  | 0.20  | 0.12  | 0.07  | 0.02  | 0.02  | 0.03  | 0.01  | 0.01  |
| Peru    | G6092     | 1              | 0.82 | -1.45 | -2.81 | -3.22 | -3.43 | -3.43 | -3.28 | -3.01 | -2.85 | -2.63 | -2.19 | -1.84 | -1.51 | -1.29 | -1.08 | -0.65 | -0.40 |
| Peru    | G6093     | 1              | 0.51 | 0.26  | 0.12  | 0.05  | 0.00  | -0.03 | -0.06 | -0.08 | -0.09 | -0.10 | -0.12 | -0.15 | 0.04  | 0.19  | 0.20  | 0.17  | 0.15  |
| Peru    | G6094     | 1              | 0.85 | 0.62  | 0.30  | 0.04  | -0.12 | -0.19 | -0.24 | -0.26 | -0.26 | -0.25 | -0.24 | -0.25 | -0.22 | -0.09 | -0.05 | -0.05 | -0.08 |
| Peru    | G6095     | 1              | 0.94 | 0.68  | 0.36  | 0.11  | -0.06 | -0.16 | -0.23 | -0.28 | -0.33 | -0.36 | -0.41 | -0.44 | -0.49 | -0.41 | -0.26 | -0.21 | -0.27 |
| Peru    | G6096     | 1              | 0.62 | 0.21  | -0.05 | -0.21 | -0.33 | -0.42 | -0.49 | -0.54 | -0.59 | -0.63 | -0.70 | -0.77 | -0.73 | -0.63 | -0.67 | -0.85 | -0.99 |
| Peru    | G6097     | 1              | 0.48 | 0.26  | 0.09  | -0.01 | -0.10 | -0.18 | -0.24 | -0.28 | -0.33 | -0.38 | -0.43 | -0.52 | -0.52 | -0.58 | -0.67 | -0.84 | -0.93 |
| Peru    | G6098     | 1              | 0.38 | -0.02 | -0.23 | -0.36 | -0.45 | -0.54 | -0.63 | -0.68 | -0.73 | -0.78 | -0.85 | -0.95 | -1.10 | -1.23 | -1.30 | -1.37 | -1.44 |
| Peru    | G6099     | 1              | 0.55 | 0.32  | 0.19  | 0.16  | 0.11  | 0.05  | 0.01  | -0.02 | -0.06 | -0.09 | -0.14 | -0.20 | -0.33 | -0.47 | -0.55 | -0.65 | -0.71 |

| Country   | GloFAS ID | Station filter | LT1  | LT2  | LT3   | LT4   | LT5   | LT6   | LT7   | LT8   | LT9   | LT10  | LT12  | LT14  | LT16  | LT18  | LT20  | LT25  | L30   |
|-----------|-----------|----------------|------|------|-------|-------|-------|-------|-------|-------|-------|-------|-------|-------|-------|-------|-------|-------|-------|
| Peru      | G6100     | 1              | 0.80 | 0.56 | 0.30  | 0.10  | -0.01 | -0.08 | -0.15 | -0.19 | -0.24 | -0.29 | -0.35 | -0.41 | -0.44 | -0.35 | -0.28 | -0.33 | -0.44 |
| Peru      | G6101     | 1              | 0.71 | 0.47 | 0.35  | 0.28  | 0.25  | 0.20  | 0.15  | 0.11  | 0.06  | 0.01  | -0.05 | -0.11 | -0.15 | -0.13 | -0.12 | -0.16 | -0.19 |
| Peru      | G6102     | 1              | 0.66 | 0.43 | 0.33  | 0.29  | 0.26  | 0.22  | 0.21  | 0.18  | 0.13  | 0.11  | 0.06  | 0.03  | 0.01  | -0.02 | -0.04 | -0.09 | -0.12 |
| Peru      | G6103     | 1              | 0.57 | 0.40 | 0.30  | 0.22  | 0.19  | 0.21  | 0.18  | 0.15  | 0.14  | 0.12  | 0.09  | 0.10  | -0.04 | -0.24 | -0.28 | -0.38 | -0.40 |
| Peru      | G6104     | 1              | 0.60 | 0.30 | 0.13  | 0.01  | -0.07 | -0.13 | -0.16 | -0.18 | -0.20 | -0.21 | -0.23 | -0.24 | -0.16 | -0.14 | -0.13 | -0.15 | -0.16 |
| Peru      | G6105     | 1              | 1.00 | 0.99 | 0.95  | 0.90  | 0.82  | 0.72  | 0.61  | 0.49  | 0.37  | 0.26  | 0.05  | -0.11 | -0.24 | -0.37 | -0.52 | -0.57 | -0.48 |
| Uruguay   | G1478     | 1              | 0.98 | 0.91 | 0.83  | 0.76  | 0.71  | 0.66  | 0.60  | 0.56  | 0.53  | 0.51  | 0.46  | 0.41  | 0.38  | 0.36  | 0.34  | 0.30  | 0.28  |
| Uruguay   | G1479     | 1              | 0.96 | 0.87 | 0.78  | 0.73  | 0.68  | 0.61  | 0.55  | 0.51  | 0.48  | 0.45  | 0.41  | 0.39  | 0.36  | 0.34  | 0.33  | 0.28  | 0.26  |
| Uruguay   | G1480     | 1              | 0.98 | 0.93 | 0.85  | 0.77  | 0.72  | 0.67  | 0.61  | 0.56  | 0.54  | 0.52  | 0.47  | 0.43  | 0.39  | 0.37  | 0.36  | 0.30  | 0.29  |
| Uruguay   | G1481     | 1              | 0.99 | 0.97 | 0.92  | 0.85  | 0.79  | 0.73  | 0.68  | 0.62  | 0.58  | 0.55  | 0.49  | 0.45  | 0.41  | 0.37  | 0.36  | 0.30  | 0.25  |
| Uruguay   | G1483     | 1              | 0.98 | 0.93 | 0.86  | 0.80  | 0.75  | 0.69  | 0.64  | 0.59  | 0.55  | 0.53  | 0.47  | 0.45  | 0.42  | 0.39  | 0.38  | 0.33  | 0.30  |
| Uruguay   | G1489     | 1              | 1.00 | 0.99 | 0.97  | 0.95  | 0.92  | 0.88  | 0.84  | 0.80  | 0.76  | 0.71  | 0.64  | 0.57  | 0.51  | 0.45  | 0.41  | 0.32  | 0.26  |
| Uruguay   | G1491     | 1              | 0.93 | 0.86 | 0.78  | 0.71  | 0.66  | 0.62  | 0.56  | 0.52  | 0.50  | 0.47  | 0.40  | 0.38  | 0.36  | 0.34  | 0.32  | 0.28  | 0.27  |
| Uruguay   | G1496     | 1              | 0.93 | 0.84 | 0.78  | 0.72  | 0.65  | 0.60  | 0.57  | 0.53  | 0.51  | 0.49  | 0.43  | 0.41  | 0.37  | 0.36  | 0.33  | 0.30  | 0.27  |
| Uruguay   | G1501     | 1              | 0.97 | 0.90 | 0.84  | 0.79  | 0.73  | 0.68  | 0.63  | 0.60  | 0.57  | 0.53  | 0.49  | 0.44  | 0.40  | 0.37  | 0.34  | 0.29  | 0.25  |
| Uruguay   | G1505     | 1              | 0.89 | 0.80 | 0.77  | 0.74  | 0.70  | 0.64  | 0.61  | 0.61  | 0.57  | 0.53  | 0.51  | 0.46  | 0.45  | 0.42  | 0.39  | 0.36  | 0.34  |
| Uruguay   | G1836     | 1              | 0.92 | 0.80 | 0.70  | 0.64  | 0.56  | 0.50  | 0.47  | 0.42  | 0.40  | 0.38  | 0.36  | 0.34  | 0.32  | 0.30  | 0.27  | 0.24  | 0.22  |
| Uruguay   | G1837     | 1              | 0.96 | 0.87 | 0.78  | 0.71  | 0.65  | 0.59  | 0.54  | 0.49  | 0.47  | 0.44  | 0.40  | 0.38  | 0.35  | 0.32  | 0.30  | 0.24  | 0.23  |
| Uruguay   | G1838     | 1              | 0.95 | 0.85 | 0.77  | 0.70  | 0.63  | 0.57  | 0.53  | 0.49  | 0.46  | 0.44  | 0.39  | 0.35  | 0.32  | 0.31  | 0.29  | 0.26  | 0.23  |
| Uruguay   | G6020     | 1              | 1.00 | 0.96 | 0.90  | 0.83  | 0.77  | 0.70  | 0.64  | 0.59  | 0.56  | 0.53  | 0.46  | 0.41  | 0.36  | 0.33  | 0.30  | 0.25  | 0.22  |
| Uruguay   | G6026     | 1              | 1.00 | 1.00 | 1.00  | 0.99  | 0.98  | 0.97  | 0.96  | 0.94  | 0.92  | 0.89  | 0.84  | 0.77  | 0.71  | 0.66  | 0.60  | 0.47  | 0.38  |
| Venezuela | G1075     | 1              | 0.63 | 0.44 | 0.35  | 0.26  | 0.19  | 0.14  | 0.10  | 0.05  | 0.00  | -0.03 | -0.10 | -0.15 | -0.03 | 0.00  | 0.01  | 0.01  | -0.03 |
| Venezuela | G1079     | 1              | 1.00 | 1.00 | 0.99  | 0.99  | 0.98  | 0.96  | 0.94  | 0.92  | 0.89  | 0.86  | 0.78  | 0.70  | 0.61  | 0.53  | 0.45  | 0.30  | 0.19  |
| Venezuela | G1080     | 0              | 0.48 | 0.10 | -0.16 | -0.32 | -0.45 | -0.57 | -0.65 | -0.70 | -0.77 | -0.84 | -0.93 | -0.99 | -0.89 | -0.65 | -0.56 | -0.50 | -0.46 |
| Venezuela | G1096     | 1              | 0.97 | 0.90 | 0.80  | 0.67  | 0.54  | 0.42  | 0.32  | 0.23  | 0.16  | 0.09  | -0.03 | -0.11 | -0.18 | -0.26 | -0.34 | -0.50 | -0.63 |
| Venezuela | G1100     | 1              | 0.98 | 0.90 | 0.78  | 0.63  | 0.48  | 0.35  | 0.24  | 0.15  | 0.07  | 0.00  | -0.12 | -0.20 | -0.27 | -0.35 | -0.43 | -0.61 | -0.76 |
| Venezuela | G1101     | 1              | 0.97 | 0.89 | 0.77  | 0.63  | 0.50  | 0.38  | 0.29  | 0.21  | 0.14  | 0.08  | -0.02 | -0.10 | -0.17 | -0.25 | -0.31 | -0.41 | -0.51 |
| Venezuela | G1102     | 1              | 0.97 | 0.86 | 0.70  | 0.53  | 0.38  | 0.27  | 0.17  | 0.09  | 0.02  | -0.04 | -0.14 | -0.22 | -0.28 | -0.36 | -0.46 | -0.73 | -0.92 |
| Venezuela | G1123     | 1              | 0.97 | 0.84 | 0.67  | 0.51  | 0.36  | 0.25  | 0.15  | 0.06  | -0.02 | -0.09 | -0.21 | -0.31 | -0.41 | -0.43 | -0.43 | -0.52 | -0.64 |
| Venezuela | G1130     | 1              | 1.00 | 0.99 | 0.97  | 0.95  | 0.90  | 0.83  | 0.75  | 0.66  | 0.57  | 0.49  | 0.36  | 0.26  | 0.20  | 0.15  | 0.11  | 0.00  | -0.10 |
| Venezuela | G1754     | 1              | 0.95 | 0.74 | 0.51  | 0.31  | 0.15  | 0.03  | -0.07 | -0.16 | -0.23 | -0.29 | -0.43 | -0.53 | -0.62 | -0.74 | -0.86 | -1.12 | -1.29 |
| Venezuela | G1755     | 1              | 1.00 | 0.98 | 0.96  | 0.94  | 0.91  | 0.88  | 0.84  | 0.81  | 0.77  | 0.72  | 0.64  | 0.56  | 0.49  | 0.43  | 0.39  | 0.29  | 0.21  |
| Venezuela | G1756     | 1              | 1.00 | 0.99 | 0.96  | 0.92  | 0.87  | 0.82  | 0.76  | 0.71  | 0.66  | 0.61  | 0.53  | 0.46  | 0.39  | 0.33  | 0.28  | 0.19  | 0.12  |
| Venezuela | G1757     | 1              | 0.81 | 0.27 | -0.30 | -0.63 | -0.87 | -1.07 | -1.24 | -1.38 | -1.46 | -1.54 | -1.62 | -1.65 | -1.59 | -1.45 | -1.21 | -0.85 | -0.55 |
| Venezuela | G1863     | 1              | 1.00 | 0.97 | 0.90  | 0.77  | 0.63  | 0.52  | 0.43  | 0.37  | 0.32  | 0.28  | 0.22  | 0.16  | 0.11  | 0.07  | 0.03  | -0.07 | -0.16 |
| Venezuela | G1864     | 1              | 0.99 | 0.98 | 0.96  | 0.93  | 0.90  | 0.87  | 0.83  | 0.79  | 0.74  | 0.70  | 0.62  | 0.54  | 0.47  | 0.42  | 0.37  | 0.28  | 0.20  |
| Venezuela | G1989     | 1              | 0.97 | 0.88 | 0.79  | 0.73  | 0.66  | 0.60  | 0.55  | 0.49  | 0.44  | 0.40  | 0.33  | 0.27  | 0.21  | 0.18  | 0.15  | 0.08  | 0.04  |
| Venezuela | G1990     | 1              | 0.99 | 0.96 | 0.89  | 0.83  | 0.76  | 0.70  | 0.65  | 0.60  | 0.55  | 0.50  | 0.43  | 0.36  | 0.30  | 0.25  | 0.21  | 0.13  | 0.07  |
| Venezuela | G1991     | 1              | 1.00 | 0.99 | 0.97  | 0.91  | 0.82  | 0.71  | 0.61  | 0.52  | 0.46  | 0.40  | 0.32  | 0.26  | 0.20  | 0.15  | 0.11  | 0.00  | -0.07 |

| Country   | GloFAS ID | Station filter | LT1  | LT2  | LT3  | LT4  | LT5   | LT6   | LT7   | LT8   | LT9   | LT10  | LT12  | LT14  | LT16  | LT18  | LT20  | LT25  | L30   |
|-----------|-----------|----------------|------|------|------|------|-------|-------|-------|-------|-------|-------|-------|-------|-------|-------|-------|-------|-------|
| Venezuela | G1992     | 1              | 0.97 | 0.91 | 0.81 | 0.75 | 0.69  | 0.65  | 0.61  | 0.58  | 0.54  | 0.51  | 0.44  | 0.40  | 0.32  | 0.27  | 0.21  | 0.10  | 0.03  |
| Venezuela | G1993     | 1              | 0.96 | 0.90 | 0.79 | 0.70 | 0.63  | 0.60  | 0.57  | 0.53  | 0.51  | 0.49  | 0.45  | 0.40  | 0.35  | 0.32  | 0.30  | 0.22  | 0.15  |
| Venezuela | G1994     | 1              | 1.00 | 0.98 | 0.96 | 0.92 | 0.86  | 0.80  | 0.74  | 0.68  | 0.63  | 0.57  | 0.48  | 0.40  | 0.34  | 0.28  | 0.22  | 0.08  | -0.02 |
| Venezuela | G1995     | 1              | 1.00 | 1.00 | 0.99 | 0.98 | 0.97  | 0.96  | 0.93  | 0.90  | 0.87  | 0.84  | 0.76  | 0.67  | 0.58  | 0.50  | 0.43  | 0.29  | 0.18  |
| Venezuela | G5028     | 1              | 0.99 | 0.96 | 0.92 | 0.85 | 0.77  | 0.71  | 0.64  | 0.59  | 0.54  | 0.49  | 0.42  | 0.35  | 0.29  | 0.24  | 0.17  | 0.05  | -0.04 |
| Venezuela | G5047     | 1              | 1.00 | 0.99 | 0.98 | 0.96 | 0.95  | 0.93  | 0.91  | 0.89  | 0.87  | 0.85  | 0.82  | 0.79  | 0.76  | 0.74  | 0.71  | 0.65  | 0.59  |
| Venezuela | G5053     | 1              | 1.00 | 1.00 | 0.99 | 0.98 | 0.97  | 0.94  | 0.92  | 0.89  | 0.85  | 0.81  | 0.73  | 0.64  | 0.55  | 0.48  | 0.41  | 0.27  | 0.17  |
| Venezuela | G5057     | 1              | 0.99 | 0.97 | 0.94 | 0.91 | 0.88  | 0.83  | 0.77  | 0.72  | 0.66  | 0.61  | 0.52  | 0.45  | 0.38  | 0.32  | 0.26  | 0.17  | 0.09  |
| Venezuela | G5058     | 1              | 0.97 | 0.89 | 0.79 | 0.71 | 0.64  | 0.57  | 0.51  | 0.48  | 0.45  | 0.40  | 0.33  | 0.26  | 0.22  | 0.17  | 0.15  | 0.08  | 0.01  |
| Venezuela | G5060     | 1              | 1.00 | 0.99 | 0.96 | 0.89 | 0.78  | 0.67  | 0.56  | 0.49  | 0.42  | 0.37  | 0.29  | 0.23  | 0.18  | 0.13  | 0.09  | -0.01 | -0.09 |
| Venezuela | G5063     | 1              | 1.00 | 0.99 | 0.96 | 0.92 | 0.86  | 0.80  | 0.75  | 0.69  | 0.63  | 0.58  | 0.49  | 0.43  | 0.36  | 0.31  | 0.27  | 0.22  | 0.18  |
| Venezuela | G5064     | 1              | 1.00 | 1.00 | 1.00 | 0.99 | 0.99  | 0.97  | 0.95  | 0.92  | 0.89  | 0.85  | 0.77  | 0.69  | 0.61  | 0.54  | 0.47  | 0.34  | 0.24  |
| Venezuela | G5065     | 1              | 1.00 | 0.99 | 0.98 | 0.96 | 0.94  | 0.92  | 0.89  | 0.85  | 0.81  | 0.77  | 0.69  | 0.61  | 0.53  | 0.46  | 0.41  | 0.30  | 0.21  |
| Venezuela | G5066     | 1              | 1.00 | 1.00 | 0.99 | 0.97 | 0.95  | 0.93  | 0.91  | 0.88  | 0.85  | 0.81  | 0.72  | 0.64  | 0.56  | 0.49  | 0.42  | 0.30  | 0.21  |
| Venezuela | G5070     | 1              | 0.98 | 0.90 | 0.75 | 0.58 | 0.42  | 0.29  | 0.18  | 0.09  | 0.01  | -0.07 | -0.22 | -0.34 | -0.41 | -0.46 | -0.48 | -0.58 | -0.66 |
| Venezuela | G5071     | 1              | 0.99 | 0.97 | 0.93 | 0.86 | 0.78  | 0.69  | 0.59  | 0.49  | 0.41  | 0.33  | 0.18  | 0.06  | -0.03 | -0.11 | -0.18 | -0.36 | -0.50 |
| Venezuela | G5103     | 1              | 1.00 | 1.00 | 0.99 | 0.98 | 0.97  | 0.94  | 0.91  | 0.86  | 0.81  | 0.76  | 0.66  | 0.56  | 0.48  | 0.41  | 0.35  | 0.26  | 0.21  |
| Venezuela | G5109     | 1              | 0.98 | 0.97 | 0.94 | 0.91 | 0.87  | 0.82  | 0.76  | 0.70  | 0.65  | 0.59  | 0.50  | 0.43  | 0.36  | 0.30  | 0.25  | 0.16  | 0.09  |
| Venezuela | G5130     | 1              | 0.84 | 0.51 | 0.29 | 0.11 | -0.04 | -0.16 | -0.27 | -0.37 | -0.45 | -0.52 | -0.65 | -0.74 | -0.78 | -0.64 | -0.57 | -0.60 | -0.66 |
| Venezuela | G5134     | 1              | 0.99 | 0.98 | 0.96 | 0.92 | 0.87  | 0.82  | 0.77  | 0.73  | 0.69  | 0.65  | 0.60  | 0.54  | 0.49  | 0.45  | 0.41  | 0.32  | 0.26  |
| Venezuela | G5148     | 1              | 0.99 | 0.96 | 0.90 | 0.81 | 0.69  | 0.56  | 0.44  | 0.32  | 0.22  | 0.13  | 0.00  | -0.11 | -0.19 | -0.28 | -0.36 | -0.48 | -0.59 |
| Venezuela | G5149     | 1              | 0.97 | 0.88 | 0.79 | 0.67 | 0.53  | 0.39  | 0.26  | 0.16  | 0.07  | 0.00  | -0.11 | -0.20 | -0.26 | -0.27 | -0.27 | -0.33 | -0.43 |
| Venezuela | G5157     | 1              | 0.99 | 0.93 | 0.83 | 0.71 | 0.59  | 0.47  | 0.36  | 0.26  | 0.18  | 0.11  | 0.00  | -0.09 | -0.18 | -0.31 | -0.39 | -0.51 | -0.63 |
| Venezuela | G5183     | 1              | 1.00 | 0.98 | 0.94 | 0.86 | 0.76  | 0.66  | 0.55  | 0.46  | 0.38  | 0.32  | 0.23  | 0.18  | 0.14  | 0.10  | 0.05  | -0.09 | -0.17 |
| Venezuela | G5247     | 1              | 1.00 | 0.98 | 0.95 | 0.89 | 0.80  | 0.71  | 0.62  | 0.55  | 0.48  | 0.43  | 0.33  | 0.24  | 0.18  | 0.12  | 0.03  | -0.23 | -0.42 |
| Venezuela | G5259     | 1              | 0.99 | 0.96 | 0.89 | 0.80 | 0.68  | 0.55  | 0.42  | 0.31  | 0.21  | 0.12  | -0.01 | -0.11 | -0.20 | -0.29 | -0.36 | -0.48 | -0.59 |
| Venezuela | G5279     | 1              | 0.99 | 0.98 | 0.95 | 0.92 | 0.89  | 0.85  | 0.81  | 0.77  | 0.72  | 0.68  | 0.60  | 0.52  | 0.46  | 0.40  | 0.36  | 0.27  | 0.18  |
| Venezuela | G5280     | 1              | 0.99 | 0.92 | 0.81 | 0.67 | 0.55  | 0.46  | 0.38  | 0.31  | 0.27  | 0.22  | 0.12  | 0.06  | 0.00  | -0.04 | -0.06 | -0.15 | -0.22 |
