# Supplementary material for: Daily ensemble river discharge reforecasts and real-time forecasts from the operational Global Flood Awareness System
Source: Copernicus journal article supplement (doi:10.5194/hess-2020-532), 2020-10-16
Supplement: Supplementary file 3 [file hess-2020-532-supplement.zip]

---

# Global Flood Awareness System

---

## GloFAS Diagnostic Points

|                                                                      |            |
|----------------------------------------------------------------------|------------|
| <i>Table 1: GloFAS diagnostic points for Africa.....</i>             | <i>1</i>   |
| <i>Table 2: GloFAS diagnostic points for Asia. ....</i>              | <i>30</i>  |
| <i>Table 3: GloFAS diagnostic points for Australia-Oceania. ....</i> | <i>84</i>  |
| <i>Table 4: GloFAS diagnostic points for Europe.....</i>             | <i>98</i>  |
| <i>Table 5: GloFAS diagnostic points for North America.....</i>      | <i>114</i> |
| <i>Table 6: GloFAS diagnostic points for South America.....</i>      | <i>145</i> |

Table 1: GloFAS diagnostic points for Africa.

| Country      | Continent | Station Name | River Name | River Basin | GloFAS ID | Provider  | Provider ID | Catchment Area Provided km <sup>2</sup> | Catchment Area GloFAS km <sup>2</sup> | LAT Prov | LON Prov | LAT GloFAS | LON GloFAS |
|--------------|-----------|--------------|------------|-------------|-----------|-----------|-------------|-----------------------------------------|---------------------------------------|----------|----------|------------|------------|
| Abyei Region | Africa    | -            | -          | -           | G4992     | Synthetic | -           | -                                       | 146420                                | -        | -        | 9.65       | 28.45      |
| Abyei Region | Africa    | -            | -          | -           | G4995     | Synthetic | -           | -                                       | 149158                                | -        | -        | 9.55       | 28.35      |
| Algeria      | Africa    | Sidi Belatar | Chelif     | Chelif      | G0814     | GRDC      | 1104150     | 43750                                   | 44624                                 | 36.02    | -0.27    | 35.95      | -0.45      |
| Algeria      | Africa    | -            | -          | -           | G4208     | Synthetic | -           | -                                       | 39966                                 | -        | -        | 34.25      | 6.05       |
| Algeria      | Africa    | -            | -          | -           | G4209     | Synthetic | -           | -                                       | 28033                                 | -        | -        | 34.25      | 6.45       |
| Algeria      | Africa    | -            | -          | -           | G4212     | Synthetic | -           | -                                       | 18190                                 | -        | -        | 34.15      | 6.05       |
| Algeria      | Africa    | -            | -          | -           | G4213     | Synthetic | -           | -                                       | 58568                                 | -        | -        | 34.15      | 6.25       |
| Algeria      | Africa    | -            | -          | -           | G4274     | Synthetic | -           | -                                       | 34339                                 | -        | -        | 32.35      | 7.15       |
| Algeria      | Africa    | -            | -          | -           | G4280     | Synthetic | -           | -                                       | 54844                                 | -        | -        | 32.15      | 7.25       |
| Algeria      | Africa    | -            | -          | -           | G4302     | Synthetic | -           | -                                       | 20348                                 | -        | -        | 31.45      | 7.65       |
| Algeria      | Africa    | -            | -          | -           | G4306     | Synthetic | -           | -                                       | 21957                                 | -        | -        | 31.35      | 7.55       |
| Algeria      | Africa    | -            | -          | -           | G4319     | Synthetic | -           | -                                       | 21586                                 | -        | -        | 31.15      | 5.75       |
| Algeria      | Africa    | -            | -          | -           | G4320     | Synthetic | -           | -                                       | 11031                                 | -        | -        | 31.15      | 5.85       |
| Algeria      | Africa    | -            | -          | -           | G4325     | Synthetic | -           | -                                       | 32614                                 | -        | -        | 31.05      | 5.05       |
| Algeria      | Africa    | -            | -          | -           | G4326     | Synthetic | -           | -                                       | 20250                                 | -        | -        | 31.05      | 5.15       |
| Algeria      | Africa    | -            | -          | -           | G4346     | Synthetic | -           | -                                       | 14311                                 | -        | -        | 30.65      | -4.35      |
| Algeria      | Africa    | -            | -          | -           | G4347     | Synthetic | -           | -                                       | 27597                                 | -        | -        | 31.45      | -2.85      |
| Algeria      | Africa    | -            | -          | -           | G4352     | Synthetic | -           | -                                       | 14186                                 | -        | -        | 30.55      | -2.25      |
| Algeria      | Africa    | -            | -          | -           | G4390     | Synthetic | -           | -                                       | 80361                                 | -        | -        | 29.35      | -1.15      |
| Algeria      | Africa    | -            | -          | -           | G4397     | Synthetic | -           | -                                       | 16143                                 | -        | -        | 29.25      | -0.95      |
| Algeria      | Africa    | -            | -          | -           | G4404     | Synthetic | -           | -                                       | 15295                                 | -        | -        | 29.05      | -0.05      |
| Algeria      | Africa    | -            | -          | -           | G4405     | Synthetic | -           | -                                       | 34595                                 | -        | -        | 29.05      | -0.15      |
| Algeria      | Africa    | -            | -          | -           | G4452     | Synthetic | -           | -                                       | 19156                                 | -        | -        | 27.75      | -7.65      |
| Algeria      | Africa    | -            | -          | -           | G4459     | Synthetic | -           | -                                       | 24138                                 | -        | -        | 27.65      | -7.85      |
| Algeria      | Africa    | -            | -          | -           | G4473     | Synthetic | -           | -                                       | 14284                                 | -        | -        | 27.05      | 8.65       |
| Algeria      | Africa    | -            | -          | -           | G4477     | Synthetic | -           | -                                       | 22833                                 | -        | -        | 26.95      | -0.25      |
| Algeria      | Africa    | -            | -          | -           | G4478     | Synthetic | -           | -                                       | 12649                                 | -        | -        | 26.95      | 8.55       |
| Algeria      | Africa    | -            | -          | -           | G4524     | Synthetic | -           | -                                       | 26752                                 | -        | -        | 25.95      | 5.25       |
| Algeria      | Africa    | -            | -          | -           | G4525     | Synthetic | -           | -                                       | 27955                                 | -        | -        | 25.95      | 5.35       |
| Algeria      | Africa    | -            | -          | -           | G4527     | Synthetic | -           | -                                       | 11382                                 | -        | -        | 25.85      | 5.25       |
| Algeria      | Africa    | -            | -          | -           | G4528     | Synthetic | -           | -                                       | 15257                                 | -        | -        | 25.85      | 5.35       |
| Algeria      | Africa    | -            | -          | -           | G4609     | Synthetic | -           | -                                       | 28723                                 | -        | -        | 23.45      | 1.05       |
| Algeria      | Africa    | -            | -          | -           | G4613     | Synthetic | -           | -                                       | 20946                                 | -        | -        | 23.35      | 1.05       |
| Algeria      | Africa    | -            | -          | -           | G4637     | Synthetic | -           | -                                       | 23623                                 | -        | -        | 22.25      | 2.35       |
| Algeria      | Africa    | -            | -          | -           | G4638     | Synthetic | -           | -                                       | 17630                                 | -        | -        | 22.25      | 3.35       |
| Algeria      | Africa    | -            | -          | -           | G4639     | Synthetic | -           | -                                       | 71899                                 | -        | -        | 22.15      | 1.55       |
| Algeria      | Africa    | -            | -          | -           | G4640     | Synthetic | -           | -                                       | 46205                                 | -        | -        | 22.15      | 2.35       |

| Country | Continent | Station Name | River Name | River Basin | GloFAS ID | Provider  | Provider ID | Catchment Area Provided km² | Catchment Area GloFAS km² | LAT Prov | LON Prov | LAT GloFAS | LON GloFAS |
|---------|-----------|--------------|------------|-------------|-----------|-----------|-------------|-----------------------------|---------------------------|----------|----------|------------|------------|
| Algeria | Africa    | -            | -          | -           | G4641     | Synthetic | -           | -                           | 17493                     | -        | -        | 22.15      | 3.35       |
| Algeria | Africa    | -            | -          | -           | G4642     | Synthetic | -           | -                           | 19228                     | -        | -        | 22.05      | 1.55       |
| Algeria | Africa    | -            | -          | -           | G4666     | Synthetic | -           | -                           | 19604                     | -        | -        | 21.45      | 7.45       |
| Algeria | Africa    | -            | -          | -           | G4669     | Synthetic | -           | -                           | 32870                     | -        | -        | 21.35      | 7.25       |
| Algeria | Africa    | -            | -          | -           | G4687     | Synthetic | -           | -                           | 53749                     | -        | -        | 20.95      | 7.45       |
| Algeria | Africa    | -            | -          | -           | G4717     | Synthetic | -           | -                           | 16281                     | -        | -        | 19.75      | 6.15       |
| Angola  | Africa    | -            | -          | -           | G5480     | Synthetic | -           | -                           | 101957                    | -        | -        | -5.95      | 16.55      |
| Angola  | Africa    | -            | -          | -           | G5520     | Synthetic | -           | -                           | 13888                     | -        | -        | -7.45      | 17.05      |
| Angola  | Africa    | -            | -          | -           | G5521     | Synthetic | -           | -                           | 76833                     | -        | -        | -7.45      | 17.15      |
| Angola  | Africa    | -            | -          | -           | G5530     | Synthetic | -           | -                           | 13474                     | -        | -        | -7.75      | 17.15      |
| Angola  | Africa    | -            | -          | -           | G5540     | Synthetic | -           | -                           | 14762                     | -        | -        | -8.45      | 17.45      |
| Angola  | Africa    | -            | -          | -           | G5541     | Synthetic | -           | -                           | 39959                     | -        | -        | -8.45      | 17.65      |
| Angola  | Africa    | -            | -          | -           | G5561     | Synthetic | -           | -                           | 22902                     | -        | -        | -9.55      | 14.25      |
| Angola  | Africa    | -            | -          | -           | G5563     | Synthetic | -           | -                           | 119033                    | -        | -        | -9.65      | 14.35      |
| Angola  | Africa    | -            | -          | -           | G5571     | Synthetic | -           | -                           | 26295                     | -        | -        | -10.35     | 16.55      |
| Angola  | Africa    | -            | -          | -           | G5573     | Synthetic | -           | -                           | 61257                     | -        | -        | -10.45     | 16.45      |
| Angola  | Africa    | -            | -          | -           | G5576     | Synthetic | -           | -                           | 46292                     | -        | -        | -10.55     | 16.65      |
| Angola  | Africa    | -            | -          | -           | G5579     | Synthetic | -           | -                           | 13522                     | -        | -        | -10.65     | 16.55      |
| Angola  | Africa    | -            | -          | -           | G5614     | Synthetic | -           | -                           | 17355                     | -        | -        | -12.15     | 22.55      |
| Angola  | Africa    | -            | -          | -           | G5615     | Synthetic | -           | -                           | 20945                     | -        | -        | -12.15     | 22.65      |
| Angola  | Africa    | -            | -          | -           | G5623     | Synthetic | -           | -                           | 23876                     | -        | -        | -12.45     | 22.45      |
| Angola  | Africa    | -            | -          | -           | G5624     | Synthetic | -           | -                           | 40686                     | -        | -        | -12.45     | 22.55      |
| Angola  | Africa    | -            | -          | -           | G5673     | Synthetic | -           | -                           | 13690                     | -        | -        | -15.45     | 17.25      |
| Angola  | Africa    | -            | -          | -           | G5675     | Synthetic | -           | -                           | 16298                     | -        | -        | -15.55     | 17.25      |
| Angola  | Africa    | -            | -          | -           | G5692     | Synthetic | -           | -                           | 31677                     | -        | -        | -16.25     | 19.05      |
| Angola  | Africa    | -            | -          | -           | G5695     | Synthetic | -           | -                           | 13010                     | -        | -        | -16.35     | 18.95      |
| Angola  | Africa    | -            | -          | -           | G5706     | Synthetic | -           | -                           | 53448                     | -        | -        | -16.65     | 15.05      |
| Angola  | Africa    | -            | -          | -           | G5709     | Synthetic | -           | -                           | 24288                     | -        | -        | -16.75     | 14.85      |
| Angola  | Africa    | -            | -          | -           | G5713     | Synthetic | -           | -                           | 56042                     | -        | -        | -16.95     | 18.05      |
| Angola  | Africa    | -            | -          | -           | G5714     | Synthetic | -           | -                           | 12002                     | -        | -        | -16.95     | 18.15      |
| Angola  | Africa    | -            | -          | -           | G5715     | Synthetic | -           | -                           | 12092                     | -        | -        | -16.95     | 21.85      |
| Angola  | Africa    | -            | -          | -           | G5717     | Synthetic | -           | -                           | 15514                     | -        | -        | -17.05     | 21.85      |
| Angola  | Africa    | -            | -          | -           | G5723     | Synthetic | -           | -                           | 63838                     | -        | -        | -17.25     | 22.95      |
| Angola  | Africa    | -            | -          | -           | G5726     | Synthetic | -           | -                           | 36374                     | -        | -        | -17.35     | 22.95      |
| Angola  | Africa    | -            | -          | -           | G5733     | Synthetic | -           | -                           | 76129                     | -        | -        | -17.75     | 18.75      |
| Angola  | Africa    | -            | -          | -           | G5740     | Synthetic | -           | -                           | 105447                    | -        | -        | -17.85     | 20.35      |
| Angola  | Africa    | -            | -          | -           | G5741     | Synthetic | -           | -                           | 56940                     | -        | -        | -17.85     | 20.55      |
| Angola  | Africa    | -            | -          | -           | G5743     | Synthetic | -           | -                           | 164383                    | -        | -        | -17.95     | 20.55      |
| Benin   | Africa    | Malanville   | Niger      | Niger       | G1042     | GRDC      | 1734500     | 1000000                     | 1300460                   | 11.86    | 3.38     | 11.85      | 3.35       |

| Country  | Continent | Station Name           | River Name         | River Basin | GloFAS ID | Provider  | Provider ID | Catchment Area Provided km² | Catchment Area GloFAS km² | LAT Prov | LON Prov | LAT GloFAS | LON GloFAS |
|----------|-----------|------------------------|--------------------|-------------|-----------|-----------|-------------|-----------------------------|---------------------------|----------|----------|------------|------------|
| Benin    | Africa    | Couberi                | Sota               | Niger       | G1044     | GRDC      | 1734600     | 13410                       | 13410                     | 11.75    | 3.33     | 11.75      | 3.35       |
| Benin    | Africa    | Porga                  | Pendjari           | Volta       | G1062     | GRDC      | 1731400     | 22280                       | 22873                     | 10.2     | -0.97    | 11.05      | 1.05       |
| Benin    | Africa    | Pont De Beterou        | Oueme              | Oueme       | G1070     | GRDC      | 1733100     | 10326                       | 10151                     | 9.2      | 2.67     | 9.15       | 2.25       |
| Benin    | Africa    | Pont De Save           | Oueme              | Oueme       | G1081     | GRDC      | 1733300     | 23600                       | 23268                     | 8        | 2.42     | 8.05       | 2.35       |
| Benin    | Africa    | Sagon                  | Oueme              | Oueme       | G1087     | GRDC      | 1733500     | 37980                       | 37858                     | 7.17     | 2.43     | 7.25       | 2.45       |
| Benin    | Africa    | Bonou                  | Oueme              | Oueme       | G1090     | GRDC      | 1733600     | 46990                       | 47935                     | 6.9      | 2.45     | 6.95       | 2.45       |
| Benin    | Africa    | -                      | -                  | -           | G4943     | Synthetic | -           | -                           | 13765                     | -        | -        | 11.95      | 3.15       |
| Botswana | Africa    | Mukwe 64932102         | Okavango - Cubango | Okavango    | G1382     | GRDC      | 1257101     | 244572                      | 240290                    | -        | 21.43    | -19.85     | 23.35      |
| Botswana | Africa    | Mohembo Mtaembo        | Okavango - Cubango | Okavango    | G1387     | OKA       | -           | 410000                      | 227861                    | -        | 21.8     | -18.35     | 21.85      |
| Botswana | Africa    | Boro Junction 67932113 | Boro               | Okavango    | G1398     | GRDC      | 1357530     | -                           | 244821                    | -        | 23.4     | -19.95     | 23.45      |
| Botswana | Africa    | Samedupe 67922012      | Boteti             | Okavango    | G1399     | GRDC      | 1357501     | -                           | 371768                    | -        | 23.516   | -20.15     | 23.55      |
| Botswana | Africa    | Bund 67932115          | Lake               | Okavango    | G1400     | GRDC      | 1357510     | -                           | 125708                    | -        | 23.35    | -20.15     | 23.25      |
| Botswana | Africa    | Maun Bridge 67932114   | Thamalakane        | Okavango    | G1403     | OKA       | -           | -                           | 245272                    | -20.35   | 23.433   | -20.05     | 23.35      |
| Botswana | Africa    | Rakops 67922022        | Boteti             | Okavango    | G1405     | GRDC      | 1357500     | -                           | 411770                    | -21      | 24.366   | -20.95     | 24.35      |
| Botswana | Africa    | Tobane D S 67536021    | Motloutse          | Limpopo     | G1413     | GRDC      | 1396100     | 11370                       | 11516                     | -        | 28.016   | -21.85     | 27.95      |
| Botswana | Africa    | Tobane U S 67536031    | Motloutse          | Limpopo     | G1414     | GRDC      | 1396101     | 11213                       | 11381                     | -        | 28.016   | -21.55     | 28.05      |
| Botswana | Africa    | -                      | Okavango - Cubango | Okavango    | G1793     | DFO       | 282         | -                           | 237000                    | -        | 22.275   | -18.75     | 22.25      |
| Botswana | Africa    | -                      | -                  | -           | G5742     | Synthetic | -           | -                           | 152350                    | -        | -        | -17.85     | 25.05      |
| Botswana | Africa    | -                      | -                  | -           | G5759     | Synthetic | -           | -                           | 117041                    | -        | -        | -18.45     | 23.55      |
| Botswana | Africa    | -                      | -                  | -           | G5764     | Synthetic | -           | -                           | 22455                     | -        | -        | -18.55     | 23.55      |
| Botswana | Africa    | -                      | -                  | -           | G5775     | Synthetic | -           | -                           | 11458                     | -        | -        | -18.95     | 24.05      |
| Botswana | Africa    | -                      | -                  | -           | G5798     | Synthetic | -           | -                           | 29235                     | -        | -        | -19.95     | 21.95      |
| Botswana | Africa    | -                      | -                  | -           | G5800     | Synthetic | -           | -                           | 32862                     | -        | -        | -20.05     | 21.85      |
| Botswana | Africa    | -                      | -                  | -           | G5802     | Synthetic | -           | -                           | 62999                     | -        | -        | -20.15     | 22.05      |
| Botswana | Africa    | -                      | -                  | -           | G5807     | Synthetic | -           | -                           | 18429                     | -        | -        | -20.35     | 21.15      |
| Botswana | Africa    | -                      | -                  | -           | G5808     | Synthetic | -           | -                           | 25618                     | -        | -        | -20.35     | 22.05      |
| Botswana | Africa    | -                      | -                  | -           | G5809     | Synthetic | -           | -                           | 11733                     | -        | -        | -20.45     | 21.15      |
| Botswana | Africa    | -                      | -                  | -           | G5810     | Synthetic | -           | -                           | 97218                     | -        | -        | -20.45     | 22.45      |
| Botswana | Africa    | -                      | -                  | -           | G5821     | Synthetic | -           | -                           | 24155                     | -        | -        | -20.75     | 25.45      |
| Botswana | Africa    | -                      | -                  | -           | G5826     | Synthetic | -           | -                           | 556604                    | -        | -        | -20.85     | 25.45      |
| Botswana | Africa    | -                      | -                  | -           | G5827     | Synthetic | -           | -                           | 30448                     | -        | -        | -20.85     | 25.95      |
| Botswana | Africa    | -                      | -                  | -           | G5835     | Synthetic | -           | -                           | 584773                    | -        | -        | -20.95     | 25.85      |
| Botswana | Africa    | -                      | -                  | -           | G5845     | Synthetic | -           | -                           | 414336                    | -        | -        | -21.25     | 24.75      |
| Botswana | Africa    | -                      | -                  | -           | G5846     | Synthetic | -           | -                           | 130618                    | -        | -        | -21.25     | 24.85      |
| Botswana | Africa    | -                      | -                  | -           | G5856     | Synthetic | -           | -                           | 146141                    | -        | -        | -22.15     | 29.15      |
| Botswana | Africa    | -                      | -                  | -           | G5857     | Synthetic | -           | -                           | 58128                     | -        | -        | -22.25     | 23.95      |
| Botswana | Africa    | -                      | -                  | -           | G5858     | Synthetic | -           | -                           | 12375                     | -        | -        | -22.35     | 22.15      |
| Botswana | Africa    | -                      | -                  | -           | G5859     | Synthetic | -           | -                           | 57544                     | -        | -        | -22.35     | 24.05      |
| Botswana | Africa    | -                      | -                  | -           | G5860     | Synthetic | -           | -                           | 126344                    | -        | -        | -22.35     | 28.95      |

| Country         | Continent | Station Name | River Name       | River Basin | GloFAS ID | Provider  | Provider ID | Catchment Area Provided km² | Catchment Area GloFAS km² | LAT Prov | LON Prov | LAT GloFAS | LON GloFAS |
|-----------------|-----------|--------------|------------------|-------------|-----------|-----------|-------------|-----------------------------|---------------------------|----------|----------|------------|------------|
| Botswana        | Africa    | -            | -                | -           | G5861     | Synthetic | -           | -                           | 23620                     | -        | -        | -22.45     | 22.15      |
| Botswana        | Africa    | -            | -                | -           | G5874     | Synthetic | -           | -                           | 15900                     | -        | -        | -22.85     | 24.35      |
| Botswana        | Africa    | -            | -                | -           | G5880     | Synthetic | -           | -                           | 27413                     | -        | -        | -22.95     | 24.25      |
| Botswana        | Africa    | -            | -                | -           | G5892     | Synthetic | -           | -                           | 11538                     | -        | -        | -23.55     | 27.05      |
| Botswana        | Africa    | -            | -                | -           | G5894     | Synthetic | -           | -                           | 61652                     | -        | -        | -23.65     | 27.05      |
| Botswana        | Africa    | -            | -                | -           | G5898     | Synthetic | -           | -                           | 15902                     | -        | -        | -23.85     | 26.85      |
| Botswana        | Africa    | -            | -                | -           | G5911     | Synthetic | -           | -                           | 19446                     | -        | -        | -24.95     | 23.05      |
| Botswana        | Africa    | -            | -                | -           | G5914     | Synthetic | -           | -                           | 14055                     | -        | -        | -25.05     | 23.25      |
| Botswana        | Africa    | -            | -                | -           | G5919     | Synthetic | -           | -                           | 48308                     | -        | -        | -25.25     | 23.05      |
| Botswana        | Africa    | -            | -                | -           | G5936     | Synthetic | -           | -                           | 23115                     | -        | -        | -25.85     | 20.85      |
| Botswana        | Africa    | -            | -                | -           | G5938     | Synthetic | -           | -                           | 77490                     | -        | -        | -25.95     | 20.85      |
| Botswana        | Africa    | -            | -                | -           | G5939     | Synthetic | -           | -                           | 15057                     | -        | -        | -25.95     | 20.95      |
| Botswana        | Africa    | -            | -                | -           | G5943     | Synthetic | -           | -                           | 97501                     | -        | -        | -26.35     | 20.75      |
| Botswana        | Africa    | -            | -                | -           | G5944     | Synthetic | -           | -                           | 10844                     | -        | -        | -26.35     | 22.05      |
| Botswana        | Africa    | -            | -                | -           | G5945     | Synthetic | -           | -                           | 88813                     | -        | -        | -26.35     | 22.25      |
| Botswana        | Africa    | -            | -                | -           | G5955     | Synthetic | -           | -                           | 108442                    | -        | -        | -26.85     | 20.75      |
| Burkina Faso    | Africa    | Bassieri     | Sirba / Koulouko | Niger       | G4887     | DIST      | 4           | 8000                        | 8240                      | 12.8     | -0.33    | 12.75      | -0.35      |
| Burkina Faso    | Africa    | Sebba        | Yali (Diele)     | Niger       | G4900     | DIST      | 3           | 2280                        | 2413                      | 13.433   | -        | 13.45      | -0.45      |
| Burkina Faso    | Africa    | Liptougou    | Faga             | Niger       | G4915     | DIST      | 5           | 15700                       | 17508                     | 13.184   | -        | 13.15      | -0.25      |
| Burkina Faso    | Africa    | -            | -                | -           | G4923     | Synthetic | -           | -                           | 31477                     | -        | -        | 12.85      | -3.45      |
| Cameroon        | Africa    | -            | -                | -           | G5004     | Synthetic | -           | -                           | 27882                     | -        | -        | 9.25       | 12.95      |
| Cameroon        | Africa    | -            | -                | -           | G5005     | Synthetic | -           | -                           | 66014                     | -        | -        | 9.25       | 13.05      |
| Cameroon        | Africa    | -            | -                | -           | G5006     | Synthetic | -           | -                           | 29468                     | -        | -        | 9.25       | 13.65      |
| Cameroon        | Africa    | -            | -                | -           | G5011     | Synthetic | -           | -                           | 31770                     | -        | -        | 9.15       | 13.65      |
| Cameroon        | Africa    | -            | -                | -           | G5031     | Synthetic | -           | -                           | 13628                     | -        | -        | 8.75       | 13.95      |
| Cameroon        | Africa    | -            | -                | -           | G5120     | Synthetic | -           | -                           | 22654                     | -        | -        | 6.25       | 12.75      |
| Cameroon        | Africa    | -            | -                | -           | G5122     | Synthetic | -           | -                           | 19971                     | -        | -        | 5.35       | 13.45      |
| Cameroon        | Africa    | -            | -                | -           | G5136     | Synthetic | -           | -                           | 43533                     | -        | -        | 4.45       | 11.25      |
| Cameroon        | Africa    | Mbalmayo     | Nyong            | -           | G5137     | mtropics  | 106096      | -                           | 14706                     | 3.52     | 11.5     | 3.55       | 11.55      |
| Cameroon        | Africa    | -            | -                | -           | G5180     | Synthetic | -           | -                           | 27572                     | -        | -        | 2.15       | 15.15      |
| Cameroon        | Africa    | -            | -                | -           | G5184     | Synthetic | -           | -                           | 39695                     | -        | -        | 2.05       | 15.15      |
| Central African | Africa    | Batangafo    | Ouham            | Lake Chad   | G1086     | GRDC      | 1737210     | 44700                       | 44355                     | 7.3      | 18.28    | 7.45       | 18.15      |
| Central African | Africa    | Bac Bea      | Ouham            | Lake Chad   | G1092     | GRDC      | 1737100     | 13350                       | 13308                     | 6.48     | 17.08    | 6.45       | 16.85      |
| Central African | Africa    | Bossangoa    | Ouham            | Lake Chad   | G1093     | GRDC      | 1737150     | 22800                       | 22677                     | 6.47     | 17.45    | 6.45       | 17.45      |
| Central African | Africa    | Zemio        | Mbomou           | Congo       | G1109     | GRDC      | 1749600     | 29300                       | 28257                     | 5.03     | 25.15    | 5.05       | 25.15      |
| Central African | Africa    | Loungoumba   | Mbari            | Congo       | G1111     | GRDC      | 1749510     | 23300                       | 24172                     | 4.73     | 22.68    | 4.75       | 22.65      |
| Central African | Africa    | Bangassou    | Mbomou           | Congo       | G1112     | GRDC      | 1749500     | 115000                      | 114740                    | 4.72     | 22.82    | 4.75       | 23.65      |
| Central African | Africa    | Bossele Bali | Mpoko            | Congo       | G1113     | GRDC      | 1749080     | 10800                       | 11104                     | 4.53     | 18.47    | 4.55       | 18.45      |
| Central African | Africa    | Bangui       | Ubangi           | Congo       | G1115     | GRDC      | 1749100     | 500000                      | 495752                    | 4.37     | 18.58    | 4.35       | 18.65      |

| Country         | Continent | Station Name          | River Name | River Basin | GloFAS ID | Provider  | Provider ID | Catchment Area Provided km² | Catchment Area GloFAS km² | LAT Prov | LON Prov | LAT GloFAS | LON GloFAS |
|-----------------|-----------|-----------------------|------------|-------------|-----------|-----------|-------------|-----------------------------|---------------------------|----------|----------|------------|------------|
| Central African | Africa    | M Bata                | Lobaye     | Congo       | G1117     | GRDC      | 1749050     | 31000                       | 30998                     | 3.67     | 18.3     | 3.65       | 18.25      |
| Central African | Africa    | Salo                  | Sangha     | Congo       | G1122     | GRDC      | 1748500     | 68300                       | 70875                     | 3.18     | 16.12    | 3.45       | 16.05      |
| Central African | Africa    | -                     | -          | -           | G4984     | Synthetic | -           | -                           | 46503                     | -        | -        | 9.75       | 21.45      |
| Central African | Africa    | -                     | -          | -           | G4991     | Synthetic | -           | -                           | 16289                     | -        | -        | 9.65       | 21.45      |
| Central African | Africa    | -                     | -          | -           | G5034     | Synthetic | -           | -                           | 17795                     | -        | -        | 8.65       | 19.15      |
| Central African | Africa    | -                     | -          | -           | G5040     | Synthetic | -           | -                           | 45499                     | -        | -        | 8.55       | 19.05      |
| Central African | Africa    | -                     | -          | -           | G5042     | Synthetic | -           | -                           | 21405                     | -        | -        | 8.45       | 19.05      |
| Central African | Africa    | -                     | -          | -           | G5043     | Synthetic | -           | -                           | 20165                     | -        | -        | 8.45       | 19.15      |
| Central African | Africa    | -                     | -          | -           | G5090     | Synthetic | -           | -                           | 17575                     | -        | -        | 6.75       | 22.05      |
| Central African | Africa    | -                     | -          | -           | G5091     | Synthetic | -           | -                           | 42517                     | -        | -        | 6.75       | 22.15      |
| Central African | Africa    | -                     | -          | -           | G5114     | Synthetic | -           | -                           | 16381                     | -        | -        | 5.75       | 24.45      |
| Central African | Africa    | -                     | -          | -           | G5117     | Synthetic | -           | -                           | 31989                     | -        | -        | 5.65       | 24.25      |
| Central African | Africa    | -                     | -          | -           | G5124     | Synthetic | -           | -                           | 13933                     | -        | -        | 5.15       | 19.35      |
| Central African | Africa    | -                     | -          | -           | G5125     | Synthetic | -           | -                           | 20706                     | -        | -        | 5.15       | 24.45      |
| Central African | Africa    | -                     | -          | -           | G5126     | Synthetic | -           | -                           | 468485                    | -        | -        | 5.05       | 19.35      |
| Central African | Africa    | -                     | -          | -           | G5127     | Synthetic | -           | -                           | 40669                     | -        | -        | 5.05       | 19.95      |
| Central African | Africa    | -                     | -          | -           | G5128     | Synthetic | -           | -                           | 37272                     | -        | -        | 5.05       | 24.55      |
| Central African | Africa    | -                     | -          | -           | G5131     | Synthetic | -           | -                           | 417944                    | -        | -        | 4.95       | 20.05      |
| Central African | Africa    | -                     | -          | -           | G5132     | Synthetic | -           | -                           | 53553                     | -        | -        | 4.95       | 23.85      |
| Central African | Africa    | -                     | -          | -           | G5135     | Synthetic | -           | -                           | 60447                     | -        | -        | 4.85       | 23.95      |
| Central African | Africa    | -                     | -          | -           | G5139     | Synthetic | -           | -                           | 26783                     | -        | -        | 4.35       | 18.45      |
| Central African | Africa    | -                     | -          | -           | G5140     | Synthetic | -           | -                           | 81060                     | -        | -        | 4.35       | 22.05      |
| Central African | Africa    | -                     | -          | -           | G5146     | Synthetic | -           | -                           | 312927                    | -        | -        | 4.15       | 22.15      |
| Central African | Africa    | -                     | -          | -           | G5158     | Synthetic | -           | -                           | 531061                    | -        | -        | 3.75       | 18.55      |
| Chad            | Africa    | Ndjamena Fort Lamy    | Chari      | Lake Chad   | G1038     | GRDC      | 1537100     | 600000                      | 606645                    | 12.12    | 15.03    | 12.05      | 15.05      |
| Chad            | Africa    | Chagoua               | Chari      | Lake Chad   | G1039     | GRDC      | 1537120     | -                           | 606645                    | 12.05    | 15.05    | 12.05      | 15.05      |
| Chad            | Africa    | Mailao                | Chari      | Lake Chad   | G1047     | GRDC      | 1537130     | 500000                      | 500201                    | 11.58    | 15.28    | 10.85      | 15.75      |
| Chad            | Africa    | Bongor                | Logone     | Lake Chad   | G1060     | GRDC      | 1537150     | 73700                       | 73897                     | 10.27    | 15.42    | 10.85      | 15.05      |
| Chad            | Africa    | Lai                   | Logone     | Lake Chad   | G1066     | GRDC      | 1537200     | 56700                       | 56408                     | 9.4      | 16.3     | 9.15       | 16.45      |
| Chad            | Africa    | Sarh Fort Archambault | Chari      | Lake Chad   | G1072     | GRDC      | 1537500     | 193000                      | 202322                    | 9.15     | 18.42    | 8.85       | 18.85      |
| Chad            | Africa    | Manda                 | Ouham      | Lake Chad   | G1073     | GRDC      | 1537480     | 80000                       | 80601                     | 9.08     | 18.2     | 8.95       | 17.95      |
| Chad            | Africa    | -                     | Logone     | Lake Chad   | G1744     | DFO       | 109         | -                           | 66330                     | 9.854    | 15.795   | 9.85       | 15.75      |
| Chad            | Africa    | -                     | Ouham      | Lake Chad   | G1745     | DFO       | 111         | -                           | 319381                    | 9.224    | 18.225   | 9.25       | 18.25      |
| Chad            | Africa    | -                     | -          | -           | G4727     | Synthetic | -           | -                           | 14656                     | -        | -        | 19.45      | 20.25      |
| Chad            | Africa    | -                     | -          | -           | G4728     | Synthetic | -           | -                           | 23659                     | -        | -        | 19.45      | 20.35      |
| Chad            | Africa    | -                     | -          | -           | G4800     | Synthetic | -           | -                           | 13425                     | -        | -        | 17.75      | 16.35      |
| Chad            | Africa    | -                     | -          | -           | G4801     | Synthetic | -           | -                           | 26348                     | -        | -        | 17.75      | 16.45      |
| Chad            | Africa    | -                     | -          | -           | G4811     | Synthetic | -           | -                           | 25169                     | -        | -        | 17.45      | 19.45      |
| Chad            | Africa    | -                     | -          | -           | G4827     | Synthetic | -           | -                           | 45960                     | -        | -        | 17.15      | 18.85      |

| Country | Continent | Station Name | River Name | River Basin | GloFAS ID | Provider  | Provider ID | Catchment Area Provided km² | Catchment Area GloFAS km² | LAT Prov | LON Prov | LAT GloFAS | LON GloFAS |
|---------|-----------|--------------|------------|-------------|-----------|-----------|-------------|-----------------------------|---------------------------|----------|----------|------------|------------|
| Chad    | Africa    | -            | -          | -           | G4831     | Synthetic | -           | -                           | 21454                     | -        | -        | 16.95      | 17.35      |
| Chad    | Africa    | -            | -          | -           | G4832     | Synthetic | -           | -                           | 73323                     | -        | -        | 16.95      | 17.65      |
| Chad    | Africa    | -            | -          | -           | G4833     | Synthetic | -           | -                           | 171855                    | -        | -        | 16.95      | 17.75      |
| Chad    | Africa    | -            | -          | -           | G4834     | Synthetic | -           | -                           | 258421                    | -        | -        | 16.95      | 17.95      |
| Chad    | Africa    | -            | -          | -           | G4835     | Synthetic | -           | -                           | 89216                     | -        | -        | 16.95      | 18.15      |
| Chad    | Africa    | -            | -          | -           | G4836     | Synthetic | -           | -                           | 34122                     | -        | -        | 16.95      | 18.85      |
| Chad    | Africa    | -            | -          | -           | G4839     | Synthetic | -           | -                           | 46062                     | -        | -        | 16.85      | 17.35      |
| Chad    | Africa    | -            | -          | -           | G4840     | Synthetic | -           | -                           | 98295                     | -        | -        | 16.85      | 17.75      |
| Chad    | Africa    | -            | -          | -           | G4841     | Synthetic | -           | -                           | 167544                    | -        | -        | 16.75      | 18.15      |
| Chad    | Africa    | -            | -          | -           | G4843     | Synthetic | -           | -                           | 42942                     | -        | -        | 16.65      | 16.25      |
| Chad    | Africa    | -            | -          | -           | G4846     | Synthetic | -           | -                           | 31887                     | -        | -        | 16.55      | 16.25      |
| Chad    | Africa    | -            | -          | -           | G4852     | Synthetic | -           | -                           | 16344                     | -        | -        | 16.45      | 16.15      |
| Chad    | Africa    | -            | -          | -           | G4853     | Synthetic | -           | -                           | 15304                     | -        | -        | 16.45      | 16.25      |
| Chad    | Africa    | -            | -          | -           | G4866     | Synthetic | -           | -                           | 142102                    | -        | -        | 15.75      | 18.35      |
| Chad    | Africa    | -            | -          | -           | G4867     | Synthetic | -           | -                           | 14237                     | -        | -        | 15.75      | 18.45      |
| Chad    | Africa    | -            | -          | -           | G4868     | Synthetic | -           | -                           | 129281                    | -        | -        | 15.65      | 18.25      |
| Chad    | Africa    | -            | -          | -           | G4869     | Synthetic | -           | -                           | 12342                     | -        | -        | 15.65      | 18.35      |
| Chad    | Africa    | -            | -          | -           | G4874     | Synthetic | -           | -                           | 81129                     | -        | -        | 15.35      | 17.95      |
| Chad    | Africa    | -            | -          | -           | G4875     | Synthetic | -           | -                           | 43961                     | -        | -        | 15.35      | 18.05      |
| Chad    | Africa    | -            | -          | -           | G4882     | Synthetic | -           | -                           | 12973                     | -        | -        | 14.75      | 18.25      |
| Chad    | Africa    | -            | -          | -           | G4884     | Synthetic | -           | -                           | 37208                     | -        | -        | 14.55      | 16.95      |
| Chad    | Africa    | -            | -          | -           | G4885     | Synthetic | -           | -                           | 32052                     | -        | -        | 14.55      | 17.15      |
| Chad    | Africa    | -            | -          | -           | G4925     | Synthetic | -           | -                           | 15904                     | -        | -        | 12.85      | 16.65      |
| Chad    | Africa    | -            | -          | -           | G4926     | Synthetic | -           | -                           | 37744                     | -        | -        | 12.85      | 16.85      |
| Chad    | Africa    | -            | -          | -           | G4928     | Synthetic | -           | -                           | 64728                     | -        | -        | 12.75      | 17.55      |
| Chad    | Africa    | -            | -          | -           | G4940     | Synthetic | -           | -                           | 43259                     | -        | -        | 12.15      | 22.45      |
| Chad    | Africa    | -            | -          | -           | G4941     | Synthetic | -           | -                           | 35946                     | -        | -        | 12.05      | 22.55      |
| Chad    | Africa    | -            | -          | -           | G4961     | Synthetic | -           | -                           | 37320                     | -        | -        | 10.75      | 19.75      |
| Chad    | Africa    | -            | -          | -           | G4962     | Synthetic | -           | -                           | 96815                     | -        | -        | 10.75      | 19.85      |
| Chad    | Africa    | -            | -          | -           | G4964     | Synthetic | -           | -                           | 478807                    | -        | -        | 10.55      | 16.55      |
| Chad    | Africa    | -            | -          | -           | G4967     | Synthetic | -           | -                           | 17857                     | -        | -        | 10.45      | 16.45      |
| Chad    | Africa    | -            | -          | -           | G5000     | Synthetic | -           | -                           | 35098                     | -        | -        | 9.35       | 20.45      |
| Chad    | Africa    | -            | -          | -           | G5001     | Synthetic | -           | -                           | 75288                     | -        | -        | 9.35       | 20.55      |
| Chad    | Africa    | -            | -          | -           | G5012     | Synthetic | -           | -                           | 25050                     | -        | -        | 9.15       | 18.45      |
| Chad    | Africa    | -            | -          | -           | G5022     | Synthetic | -           | -                           | 37118                     | -        | -        | 8.95       | 16.55      |
| Chad    | Africa    | -            | -          | -           | G5059     | Synthetic | -           | -                           | 54073                     | -        | -        | 7.85       | 17.75      |
| Congo   | Africa    | Kinshasa     | Congo      | Congo       | G1180     | GRDC      | 1147010     | 3475000                     | 3618130                   | -4.3     | 15.3     | -4.05      | 15.65      |
| Congo   | Africa    | -            | Lake Mweru | Congo       | G1827     | DFO       | 543         | -                           | 170816                    | -9.765   | 28.665   | -9.75      | 28.65      |
| Congo   | Africa    | -            | Lake Mweru | Congo       | G1828     | DFO       | 544         | -                           | 162009                    | -        | 28.575   | -10.25     | 28.55      |

| Country | Continent | Station Name | River Name | River Basin | GloFAS ID | Provider  | Provider ID | Catchment Area Provided km² | Catchment Area GloFAS km² | LAT Prov | LON Prov | LAT GloFAS | LON GloFAS |
|---------|-----------|--------------|------------|-------------|-----------|-----------|-------------|-----------------------------|---------------------------|----------|----------|------------|------------|
| Congo   | Africa    | -            | Lufira     | Congo       | G1891     | DFO       | 1275        | -                           | 17639                     | -        | 27.405   | -10.45     | 27.45      |
| Congo   | Africa    | -            | -          | -           | G5144     | Synthetic | -           | -                           | 147927                    | -        | -        | 4.25       | 22.55      |
| Congo   | Africa    | -            | -          | -           | G5147     | Synthetic | -           | -                           | 21497                     | -        | -        | 4.15       | 22.55      |
| Congo   | Africa    | -            | -          | -           | G5151     | Synthetic | -           | -                           | 140538                    | -        | -        | 4.05       | 22.55      |
| Congo   | Africa    | -            | -          | -           | G5159     | Synthetic | -           | -                           | 70947                     | -        | -        | 3.75       | 26.25      |
| Congo   | Africa    | -            | -          | -           | G5160     | Synthetic | -           | -                           | 16807                     | -        | -        | 3.75       | 28.65      |
| Congo   | Africa    | -            | -          | -           | G5162     | Synthetic | -           | -                           | 17664                     | -        | -        | 3.65       | 25.35      |
| Congo   | Africa    | -            | -          | -           | G5164     | Synthetic | -           | -                           | 100127                    | -        | -        | 3.55       | 25.35      |
| Congo   | Africa    | -            | -          | -           | G5165     | Synthetic | -           | -                           | 24854                     | -        | -        | 3.55       | 26.15      |
| Congo   | Africa    | -            | -          | -           | G5166     | Synthetic | -           | -                           | 22380                     | -        | -        | 3.55       | 28.55      |
| Congo   | Africa    | -            | -          | -           | G5172     | Synthetic | -           | -                           | 565644                    | -        | -        | 2.85       | 18.45      |
| Congo   | Africa    | -            | -          | -           | G5174     | Synthetic | -           | -                           | 24721                     | -        | -        | 2.75       | 18.55      |
| Congo   | Africa    | -            | -          | -           | G5177     | Synthetic | -           | -                           | 14466                     | -        | -        | 2.45       | 18.15      |
| Congo   | Africa    | -            | -          | -           | G5178     | Synthetic | -           | -                           | 594322                    | -        | -        | 2.45       | 18.25      |
| Congo   | Africa    | -            | -          | -           | G5181     | Synthetic | -           | -                           | 53547                     | -        | -        | 2.15       | 22.65      |
| Congo   | Africa    | -            | -          | -           | G5185     | Synthetic | -           | -                           | 1270660                   | -        | -        | 2.05       | 22.65      |
| Congo   | Africa    | -            | -          | -           | G5186     | Synthetic | -           | -                           | 52547                     | -        | -        | 1.95       | 19.85      |
| Congo   | Africa    | -            | -          | -           | G5187     | Synthetic | -           | -                           | 1344620                   | -        | -        | 1.85       | 19.85      |
| Congo   | Africa    | -            | -          | -           | G5188     | Synthetic | -           | -                           | 75060                     | -        | -        | 1.75       | 16.05      |
| Congo   | Africa    | -            | -          | -           | G5189     | Synthetic | -           | -                           | 20903                     | -        | -        | 1.75       | 26.95      |
| Congo   | Africa    | -            | -          | -           | G5192     | Synthetic | -           | -                           | 83859                     | -        | -        | 1.65       | 16.15      |
| Congo   | Africa    | -            | -          | -           | G5193     | Synthetic | -           | -                           | 61598                     | -        | -        | 1.65       | 27.05      |
| Congo   | Africa    | -            | -          | -           | G5199     | Synthetic | -           | -                           | 37973                     | -        | -        | 1.35       | 19.95      |
| Congo   | Africa    | -            | -          | -           | G5203     | Synthetic | -           | -                           | 120847                    | -        | -        | 1.25       | 23.65      |
| Congo   | Africa    | -            | -          | -           | G5204     | Synthetic | -           | -                           | 13359                     | -        | -        | 1.25       | 28.35      |
| Congo   | Africa    | -            | -          | -           | G5205     | Synthetic | -           | -                           | 32523                     | -        | -        | 1.15       | 19.95      |
| Congo   | Africa    | -            | -          | -           | G5206     | Synthetic | -           | -                           | 1138680                   | -        | -        | 1.15       | 23.65      |
| Congo   | Africa    | -            | -          | -           | G5207     | Synthetic | -           | -                           | 30798                     | -        | -        | 1.15       | 28.35      |
| Congo   | Africa    | -            | -          | -           | G5214     | Synthetic | -           | -                           | 1411020                   | -        | -        | -0.75      | 18.35      |
| Congo   | Africa    | -            | -          | -           | G5215     | Synthetic | -           | -                           | 82989                     | -        | -        | -0.75      | 18.45      |
| Congo   | Africa    | -            | -          | -           | G5216     | Synthetic | -           | -                           | 103587                    | -        | -        | -0.75      | 24.25      |
| Congo   | Africa    | -            | -          | -           | G5217     | Synthetic | -           | -                           | 1028790                   | -        | -        | -0.75      | 24.35      |
| Congo   | Africa    | -            | -          | -           | G5219     | Synthetic | -           | -                           | 40809                     | -        | -        | -0.65      | 25.15      |
| Congo   | Africa    | -            | -          | -           | G5220     | Synthetic | -           | -                           | 18798                     | -        | -        | -0.65      | 25.25      |
| Congo   | Africa    | -            | -          | -           | G5223     | Synthetic | -           | -                           | 982168                    | -        | -        | -0.55      | 25.15      |
| Congo   | Africa    | -            | -          | -           | G5225     | Synthetic | -           | -                           | 625236                    | -        | -        | -0.45      | 17.95      |
| Congo   | Africa    | -            | -          | -           | G5226     | Synthetic | -           | -                           | 21893                     | -        | -        | -0.45      | 18.05      |
| Congo   | Africa    | -            | -          | -           | G5227     | Synthetic | -           | -                           | 963122                    | -        | -        | -0.45      | 25.25      |
| Congo   | Africa    | -            | -          | -           | G5231     | Synthetic | -           | -                           | 13358                     | -        | -        | -0.15      | 16.05      |



| Country | Continent | Station Name | River Name | River Basin | GloFAS ID | Provider  | Provider ID | Catchment Area Provided km² | Catchment Area GloFAS km² | LAT Prov | LON Prov | LAT GloFAS | LON GloFAS |
|---------|-----------|--------------|------------|-------------|-----------|-----------|-------------|-----------------------------|---------------------------|----------|----------|------------|------------|
| Congo   | Africa    | -            | -          | -           | G5232     | Synthetic | -           | -                           | 13358                     | -        | -        | -0.15      | 16.25      |
| Congo   | Africa    | -            | -          | -           | G5233     | Synthetic | -           | -                           | 1495620                   | -        | -        | -0.15      | 18.25      |
| Congo   | Africa    | -            | -          | -           | G5234     | Synthetic | -           | -                           | 14716                     | -        | -        | -0.15      | 18.35      |
| Congo   | Africa    | -            | -          | -           | G5236     | Synthetic | -           | -                           | 17434                     | -        | -        | -0.05      | 15.95      |
| Congo   | Africa    | -            | -          | -           | G5237     | Synthetic | -           | -                           | 31657                     | -        | -        | -0.05      | 16.25      |
| Congo   | Africa    | -            | -          | -           | G5238     | Synthetic | -           | -                           | 174849                    | -        | -        | -0.05      | 18.35      |
| Congo   | Africa    | -            | -          | -           | G5242     | Synthetic | -           | -                           | 945938                    | -        | -        | -0.05      | 25.55      |
| Congo   | Africa    | -            | -          | -           | G5243     | Synthetic | -           | -                           | 13104                     | -        | -        | -0.05      | 25.65      |
| Congo   | Africa    | -            | -          | -           | G5252     | Synthetic | -           | -                           | 123362                    | -        | -        | -0.25      | 19.15      |
| Congo   | Africa    | -            | -          | -           | G5253     | Synthetic | -           | -                           | 95327                     | -        | -        | -0.25      | 19.95      |
| Congo   | Africa    | -            | -          | -           | G5254     | Synthetic | -           | -                           | 50887                     | -        | -        | -0.25      | 20.85      |
| Congo   | Africa    | -            | -          | -           | G5260     | Synthetic | -           | -                           | 21606                     | -        | -        | -0.35      | 19.95      |
| Congo   | Africa    | -            | -          | -           | G5261     | Synthetic | -           | -                           | 39248                     | -        | -        | -0.35      | 20.85      |
| Congo   | Africa    | -            | -          | -           | G5264     | Synthetic | -           | -                           | 43452                     | -        | -        | -0.45      | 19.15      |
| Congo   | Africa    | -            | -          | -           | G5268     | Synthetic | -           | -                           | 651333                    | -        | -        | -0.55      | 17.65      |
| Congo   | Africa    | -            | -          | -           | G5269     | Synthetic | -           | -                           | 1687780                   | -        | -        | -0.55      | 17.75      |
| Congo   | Africa    | -            | -          | -           | G5273     | Synthetic | -           | -                           | 51938                     | -        | -        | -0.65      | 16.65      |
| Congo   | Africa    | -            | -          | -           | G5276     | Synthetic | -           | -                           | 17549                     | -        | -        | -0.75      | 16.55      |
| Congo   | Africa    | -            | -          | -           | G5277     | Synthetic | -           | -                           | 182540                    | -        | -        | -0.75      | 17.15      |
| Congo   | Africa    | -            | -          | -           | G5278     | Synthetic | -           | -                           | 29684                     | -        | -        | -0.75      | 17.25      |
| Congo   | Africa    | -            | -          | -           | G5281     | Synthetic | -           | -                           | 16186                     | -        | -        | -1.05      | 27.25      |
| Congo   | Africa    | -            | -          | -           | G5283     | Synthetic | -           | -                           | 71958                     | -        | -        | -1.15      | 16.75      |
| Congo   | Africa    | -            | -          | -           | G5284     | Synthetic | -           | -                           | 213212                    | -        | -        | -1.15      | 16.85      |
| Congo   | Africa    | -            | -          | -           | G5285     | Synthetic | -           | -                           | 285294                    | -        | -        | -1.25      | 16.75      |
| Congo   | Africa    | -            | -          | -           | G5286     | Synthetic | -           | -                           | 2352830                   | -        | -        | -1.25      | 16.85      |
| Congo   | Africa    | -            | -          | -           | G5287     | Synthetic | -           | -                           | 16543                     | -        | -        | -1.25      | 27.45      |
| Congo   | Africa    | -            | -          | -           | G5297     | Synthetic | -           | -                           | 873922                    | -        | -        | -1.45      | 25.75      |
| Congo   | Africa    | -            | -          | -           | G5298     | Synthetic | -           | -                           | 51873                     | -        | -        | -1.45      | 25.85      |
| Congo   | Africa    | -            | -          | -           | G5303     | Synthetic | -           | -                           | 23086                     | -        | -        | -1.55      | 16.55      |
| Congo   | Africa    | -            | -          | -           | G5304     | Synthetic | -           | -                           | 2640470                   | -        | -        | -1.55      | 16.65      |
| Congo   | Africa    | -            | -          | -           | G5315     | Synthetic | -           | -                           | 20474                     | -        | -        | -1.75      | 18.45      |
| Congo   | Africa    | -            | -          | -           | G5316     | Synthetic | -           | -                           | 840994                    | -        | -        | -1.75      | 25.75      |
| Congo   | Africa    | -            | -          | -           | G5317     | Synthetic | -           | -                           | 31694                     | -        | -        | -1.75      | 25.85      |
| Congo   | Africa    | -            | -          | -           | G5331     | Synthetic | -           | -                           | 2670960                   | -        | -        | -2.05      | 16.35      |
| Congo   | Africa    | -            | -          | -           | G5359     | Synthetic | -           | -                           | 119068                    | -        | -        | -2.75      | 18.15      |
| Congo   | Africa    | -            | -          | -           | G5360     | Synthetic | -           | -                           | 28694                     | -        | -        | -2.75      | 25.95      |
| Congo   | Africa    | -            | -          | -           | G5362     | Synthetic | -           | -                           | 2689590                   | -        | -        | -2.85      | 16.15      |
| Congo   | Africa    | -            | -          | -           | G5363     | Synthetic | -           | -                           | 795660                    | -        | -        | -2.85      | 25.95      |
| Congo   | Africa    | -            | -          | -           | G5364     | Synthetic | -           | -                           | 14912                     | -        | -        | -2.95      | 16.05      |

| Country | Continent | Station Name | River Name | River Basin | GloFAS ID | Provider  | Provider ID | Catchment Area Provided km² | Catchment Area GloFAS km² | LAT Prov | LON Prov | LAT GloFAS | LON GloFAS |
|---------|-----------|--------------|------------|-------------|-----------|-----------|-------------|-----------------------------|---------------------------|----------|----------|------------|------------|
| Congo   | Africa    | -            | -          | -           | G5370     | Synthetic | -           | -                           | 2706110                   | -        | -        | -3.05      | 16.15      |
| Congo   | Africa    | -            | -          | -           | G5371     | Synthetic | -           | -                           | 135716                    | -        | -        | -3.05      | 17.05      |
| Congo   | Africa    | -            | -          | -           | G5373     | Synthetic | -           | -                           | 889647                    | -        | -        | -3.15      | 16.25      |
| Congo   | Africa    | -            | -          | -           | G5374     | Synthetic | -           | -                           | 748632                    | -        | -        | -3.15      | 17.05      |
| Congo   | Africa    | -            | -          | -           | G5377     | Synthetic | -           | -                           | 474475                    | -        | -        | -3.25      | 17.45      |
| Congo   | Africa    | -            | -          | -           | G5381     | Synthetic | -           | -                           | 16267                     | -        | -        | -3.35      | 12.65      |
| Congo   | Africa    | -            | -          | -           | G5382     | Synthetic | -           | -                           | 269109                    | -        | -        | -3.35      | 17.35      |
| Congo   | Africa    | -            | -          | -           | G5386     | Synthetic | -           | -                           | 174132                    | -        | -        | -3.45      | 17.35      |
| Congo   | Africa    | -            | -          | -           | G5387     | Synthetic | -           | -                           | 94730                     | -        | -        | -3.45      | 17.45      |
| Congo   | Africa    | -            | -          | -           | G5388     | Synthetic | -           | -                           | 27682                     | -        | -        | -3.55      | 12.65      |
| Congo   | Africa    | -            | -          | -           | G5403     | Synthetic | -           | -                           | 65052                     | -        | -        | -3.85      | 18.05      |
| Congo   | Africa    | -            | -          | -           | G5407     | Synthetic | -           | -                           | 25986                     | -        | -        | -3.95      | 17.95      |
| Congo   | Africa    | -            | -          | -           | G5408     | Synthetic | -           | -                           | 133907                    | -        | -        | -4.05      | 17.05      |
| Congo   | Africa    | -            | -          | -           | G5409     | Synthetic | -           | -                           | 35796                     | -        | -        | -4.05      | 17.15      |
| Congo   | Africa    | -            | -          | -           | G5410     | Synthetic | -           | -                           | 125768                    | -        | -        | -4.05      | 21.45      |
| Congo   | Africa    | -            | -          | -           | G5411     | Synthetic | -           | -                           | 15956                     | -        | -        | -4.15      | 21.45      |
| Congo   | Africa    | -            | -          | -           | G5412     | Synthetic | -           | -                           | 18787                     | -        | -        | -4.15      | 23.05      |
| Congo   | Africa    | -            | -          | -           | G5414     | Synthetic | -           | -                           | 147135                    | -        | -        | -4.25      | 20.45      |
| Congo   | Africa    | -            | -          | -           | G5415     | Synthetic | -           | -                           | 98004                     | -        | -        | -4.25      | 23.05      |
| Congo   | Africa    | -            | -          | -           | G5420     | Synthetic | -           | -                           | 41647                     | -        | -        | -4.35      | 20.05      |
| Congo   | Africa    | -            | -          | -           | G5421     | Synthetic | -           | -                           | 399033                    | -        | -        | -4.35      | 20.15      |
| Congo   | Africa    | -            | -          | -           | G5422     | Synthetic | -           | -                           | 246374                    | -        | -        | -4.35      | 20.45      |
| Congo   | Africa    | -            | -          | -           | G5431     | Synthetic | -           | -                           | 3634350                   | -        | -        | -4.35      | 15.25      |
| Congo   | Africa    | -            | -          | -           | G5436     | Synthetic | -           | -                           | 24074                     | -        | -        | -4.75      | 26.95      |
| Congo   | Africa    | -            | -          | -           | G5440     | Synthetic | -           | -                           | 14067                     | -        | -        | -4.85      | 14.95      |
| Congo   | Africa    | -            | -          | -           | G5441     | Synthetic | -           | -                           | 15149                     | -        | -        | -4.85      | 18.65      |
| Congo   | Africa    | -            | -          | -           | G5442     | Synthetic | -           | -                           | 727957                    | -        | -        | -4.85      | 26.95      |
| Congo   | Africa    | -            | -          | -           | G5443     | Synthetic | -           | -                           | 41300                     | -        | -        | -4.95      | 18.75      |
| Congo   | Africa    | -            | -          | -           | G5444     | Synthetic | -           | -                           | 78400                     | -        | -        | -4.95      | 23.55      |
| Congo   | Africa    | -            | -          | -           | G5448     | Synthetic | -           | -                           | 71488                     | -        | -        | -5.05      | 21.15      |
| Congo   | Africa    | -            | -          | -           | G5449     | Synthetic | -           | -                           | 12483                     | -        | -        | -5.05      | 23.45      |
| Congo   | Africa    | -            | -          | -           | G5455     | Synthetic | -           | -                           | 164691                    | -        | -        | -5.15      | 21.05      |
| Congo   | Africa    | -            | -          | -           | G5465     | Synthetic | -           | -                           | 25034                     | -        | -        | -5.45      | 19.05      |
| Congo   | Africa    | -            | -          | -           | G5473     | Synthetic | -           | -                           | 447910                    | -        | -        | -5.75      | 26.85      |
| Congo   | Africa    | -            | -          | -           | G5476     | Synthetic | -           | -                           | 20042                     | -        | -        | -5.85      | 16.45      |
| Congo   | Africa    | -            | -          | -           | G5477     | Synthetic | -           | -                           | 265941                    | -        | -        | -5.85      | 27.05      |
| Congo   | Africa    | -            | -          | -           | G5481     | Synthetic | -           | -                           | 13638                     | -        | -        | -6.05      | 23.65      |
| Congo   | Africa    | -            | -          | -           | G5484     | Synthetic | -           | -                           | 57159                     | -        | -        | -6.15      | 23.85      |
| Congo   | Africa    | -            | -          | -           | G5485     | Synthetic | -           | -                           | 16146                     | -        | -        | -6.25      | 19.55      |

| Country       | Continent | Station Name | River Name    | River Basin | GloFAS ID | Provider  | Provider ID | Catchment Area Provided km² | Catchment Area GloFAS km² | LAT Prov | LON Prov | LAT GloFAS | LON GloFAS |
|---------------|-----------|--------------|---------------|-------------|-----------|-----------|-------------|-----------------------------|---------------------------|----------|----------|------------|------------|
| Congo         | Africa    | -            | -             | -           | G5489     | Synthetic | -           | -                           | 13619                     | -        | -        | -6.35      | 19.65      |
| Congo         | Africa    | -            | -             | -           | G5491     | Synthetic | -           | -                           | 18429                     | -        | -        | -6.45      | 20.75      |
| Congo         | Africa    | -            | -             | -           | G5492     | Synthetic | -           | -                           | 127555                    | -        | -        | -6.45      | 20.85      |
| Congo         | Africa    | -            | -             | -           | G5493     | Synthetic | -           | -                           | 12899                     | -        | -        | -6.45      | 23.85      |
| Congo         | Africa    | -            | -             | -           | G5494     | Synthetic | -           | -                           | 42303                     | -        | -        | -6.45      | 23.95      |
| Congo         | Africa    | -            | -             | -           | G5495     | Synthetic | -           | -                           | 106850                    | -        | -        | -6.55      | 21.05      |
| Congo         | Africa    | -            | -             | -           | G5496     | Synthetic | -           | -                           | 424446                    | -        | -        | -6.55      | 26.95      |
| Congo         | Africa    | -            | -             | -           | G5499     | Synthetic | -           | -                           | 19972                     | -        | -        | -6.65      | 20.95      |
| Congo         | Africa    | -            | -             | -           | G5500     | Synthetic | -           | -                           | 62698                     | -        | -        | -6.65      | 21.15      |
| Congo         | Africa    | -            | -             | -           | G5502     | Synthetic | -           | -                           | 42318                     | -        | -        | -6.75      | 21.05      |
| Congo         | Africa    | -            | -             | -           | G5504     | Synthetic | -           | -                           | 163169                    | -        | -        | -6.85      | 26.95      |
| Congo         | Africa    | -            | -             | -           | G5505     | Synthetic | -           | -                           | 259934                    | -        | -        | -6.85      | 27.05      |
| Congo         | Africa    | -            | -             | -           | G5507     | Synthetic | -           | -                           | 20913                     | -        | -        | -7.05      | 21.15      |
| Congo         | Africa    | -            | -             | -           | G5508     | Synthetic | -           | -                           | 20794                     | -        | -        | -7.05      | 21.25      |
| Congo         | Africa    | -            | -             | -           | G5509     | Synthetic | -           | -                           | 13492                     | -        | -        | -7.05      | 21.75      |
| Congo         | Africa    | -            | -             | -           | G5511     | Synthetic | -           | -                           | 44323                     | -        | -        | -7.15      | 21.65      |
| Congo         | Africa    | -            | -             | -           | G5531     | Synthetic | -           | -                           | 61288                     | -        | -        | -7.75      | 17.35      |
| Congo         | Africa    | -            | -             | -           | G5536     | Synthetic | -           | -                           | 20054                     | -        | -        | -8.15      | 26.65      |
| Congo         | Africa    | -            | -             | -           | G5537     | Synthetic | -           | -                           | 71839                     | -        | -        | -8.25      | 26.35      |
| Congo         | Africa    | -            | -             | -           | G5538     | Synthetic | -           | -                           | 124259                    | -        | -        | -8.25      | 26.55      |
| Congo         | Africa    | -            | -             | -           | G5539     | Synthetic | -           | -                           | 52056                     | -        | -        | -8.35      | 26.45      |
| Congo         | Africa    | -            | -             | -           | G5554     | Synthetic | -           | -                           | 27380                     | -        | -        | -9.15      | 25.65      |
| Congo         | Africa    | -            | -             | -           | G5558     | Synthetic | -           | -                           | 32827                     | -        | -        | -9.25      | 25.55      |
| Congo         | Africa    | -            | -             | -           | G5564     | Synthetic | -           | -                           | 31888                     | -        | -        | -9.65      | 27.15      |
| Cote d'Ivoire | Africa    | Kouto Amont  | Bagoé         | Niger       | G1063     | GRDC      | 1434820     | -                           | 4771                      | 9.8833   | -        | 9.85       | -6.35      |
| Cote d'Ivoire | Africa    | Kafolo       | Comoe         | Comoe       | G1065     | GRDC      | 1428200     | 21300                       | 21614                     | 9.59     | -4.29    | 9.55       | -4.25      |
| Cote d'Ivoire | Africa    | Vonkoro      | Black Volta   | Volta       | G1071     | GRDC      | 1431300     | 111500                      | 112832                    | 9.19     | -2.71    | 9.95       | -2.75      |
| Cote d'Ivoire | Africa    | Dabala       | Sassandra     | Sassandra   | G1076     | GRDC      | 1427200     | 16800                       | 16672                     | 8.4      | -7.13    | 8.45       | -7.15      |
| Cote d'Ivoire | Africa    | Serebou      | Comoe         | Comoe       | G1082     | GRDC      | 1428300     | 48700                       | 48687                     | 7.95     | -3.94    | 8.05       | -4.05      |
| Cote d'Ivoire | Africa    | Fetekro      | Nzi           | Bandama     | G1084     | GRDC      | 1426260     | 10300                       | 10427                     | 7.77     | -4.68    | 7.85       | -4.75      |
| Cote d'Ivoire | Africa    | Semien       | Sassandra     | Sassandra   | G1085     | GRDC      | 1427350     | 28800                       | 30057                     | 7.69     | -7.06    | 7.75       | -7.05      |
| Cote d'Ivoire | Africa    | Bouafle      | Bandama Rouge | Bandama     | G1088     | GRDC      | 1426300     | 19800                       | 19391                     | 6.96     | -5.76    | 7.15       | -5.95      |
| Cote d'Ivoire | Africa    | Aniassue     | Comoe         | Comoe       | G1091     | GRDC      | 1428400     | 67400                       | 67615                     | 6.62     | -3.72    | 6.95       | -3.75      |
| Cote d'Ivoire | Africa    | Mbasso       | Comoe         | Comoe       | G1097     | GRDC      | 1428500     | 69900                       | 71678                     | 6.29     | -3.49    | 6.35       | -3.55      |
| Cote d'Ivoire | Africa    | Bafecao      | Bandama       | Bandama     | G1098     | GRDC      | 1426200     | 59500                       | 59873                     | 6.06     | -4.49    | 6.35       | -5.25      |
| Cote d'Ivoire | Africa    | Zienoa       | Nzi           | Bandama     | G1099     | GRDC      | 1426350     | 35000                       | 34540                     | 6        | -4.82    | 6.15       | -4.75      |
| Cote d'Ivoire | Africa    | Tiassale     | Bandama       | Bandama     | G1103     | GRDC      | 1426380     | 95500                       | 97248                     | 5.88     | -4.75    | 5.85       | -4.85      |
| Cote d'Ivoire | Africa    | Soubre       | Sassandra     | Sassandra   | G1106     | GRDC      | 1427500     | 62000                       | 63782                     | 5.76     | -6.6     | 5.75       | -6.65      |
| Cote d'Ivoire | Africa    | Tate         | Cavally       | Cavally     | G1114     | GRDC      | 1425500     | 28800                       | 29588                     | 4.38     | -7.59    | 4.45       | -7.55      |

| Country  | Continent | Station Name    | River Name  | River Basin   | GloFAS ID | Provider  | Provider ID | Catchment Area Provided km² | Catchment Area GloFAS km² | LAT Prov | LON Prov | LAT GloFAS | LON GloFAS |
|----------|-----------|-----------------|-------------|---------------|-----------|-----------|-------------|-----------------------------|---------------------------|----------|----------|------------|------------|
| Egypt    | Africa    | -               | -           | -             | G4433     | Synthetic | -           | -                           | 11422                     | -        | -        | 28.35      | 30.85      |
| Egypt    | Africa    | -               | -           | -             | G4436     | Synthetic | -           | -                           | 2893310                   | -        | -        | 28.25      | 30.75      |
| Egypt    | Africa    | -               | -           | -             | G4512     | Synthetic | -           | -                           | 15853                     | -        | -        | 26.25      | 32.75      |
| Egypt    | Africa    | -               | -           | -             | G4519     | Synthetic | -           | -                           | 2838730                   | -        | -        | 26.05      | 32.75      |
| Egypt    | Africa    | -               | -           | -             | G4580     | Synthetic | -           | -                           | 21476                     | -        | -        | 24.45      | 32.95      |
| Egypt    | Africa    | -               | -           | -             | G4584     | Synthetic | -           | -                           | 2779450                   | -        | -        | 24.35      | 32.85      |
| Egypt    | Africa    | -               | -           | -             | G4614     | Synthetic | -           | -                           | 56462                     | -        | -        | 23.35      | 30.15      |
| Egypt    | Africa    | -               | -           | -             | G4617     | Synthetic | -           | -                           | 46447                     | -        | -        | 23.25      | 30.25      |
| Egypt    | Africa    | -               | -           | -             | G4633     | Synthetic | -           | -                           | 44630                     | -        | -        | 22.55      | 33.25      |
| Egypt    | Africa    | -               | -           | -             | G4634     | Synthetic | -           | -                           | 24891                     | -        | -        | 22.55      | 33.35      |
| Eritrea  | Africa    | -               | -           | -             | G4837     | Synthetic | -           | -                           | 26888                     | -        | -        | 16.95      | 37.35      |
| Eritrea  | Africa    | -               | -           | -             | G4838     | Synthetic | -           | -                           | 12742                     | -        | -        | 16.95      | 37.45      |
| Ethiopia | Africa    | Tendaho         | Awash       | -             | G1045     | GRDC      | 1577603     | 62088                       | 62930                     | 11.683   | 40.95    | 11.75      | 40.95      |
| Ethiopia | Africa    | Adaitu          | Awash       | -             | G1053     | GRDC      | 1577602     | 52835                       | 51380                     | 11.133   | 40.783   | 11.35      | 40.95      |
| Ethiopia | Africa    | Melka Sedi      | Awash       | -             | G1067     | GRDC      | 1577601     | 21520                       | 21582                     | 9.39     | 40.13    | 9.15       | 40.15      |
| Ethiopia | Africa    | Metahara        | Awash       | -             | G1074     | GRDC      | 1577102     | 16416                       | 16556                     | 8.85     | 39.85    | 8.85       | 39.95      |
| Ethiopia | Africa    | Gambella        | Baro        | Nile          | G1603     | National  | -           | 20740                       | 21475                     | 8.25     | 34.57    | 8.25       | 34.95      |
| Ethiopia | Africa    | Omo River Delta | Omu Delta   | Upper Ghibe   | G1901     | DFO       | 1505        | -                           | 70253                     | 4.814    | 36.045   | 4.85       | 36.05      |
| Ethiopia | Africa    | -               | Webe Gestro | Juba Shabelle | G1902     | DFO       | 1517        | -                           | 24034                     | 4.724    | 42.075   | 4.75       | 42.05      |
| Ethiopia | Africa    | -               | Shabelle    | Juba Shabelle | G1904     | DFO       | 1522        | -                           | 145482                    | 5.084    | 44.775   | 5.05       | 44.85      |
| Ethiopia | Africa    | -               | Shabelle    | Juba Shabelle | G1905     | DFO       | 1525        | -                           | 140545                    | 5.444    | 44.505   | 5.45       | 44.45      |
| Ethiopia | Africa    | -               | Shabelle    | Juba Shabelle | G1906     | DFO       | 1526        | -                           | 138324                    | 5.624    | 44.145   | 5.55       | 44.15      |
| Ethiopia | Africa    | -               | Shabelle    | Juba Shabelle | G1907     | DFO       | 1527        | -                           | 107146                    | 6.074    | 43.065   | 6.05       | 43.05      |
| Ethiopia | Africa    | -               | -           | -             | G4951     | Synthetic | -           | -                           | 70226                     | -        | -        | 11.15      | 41.65      |
| Ethiopia | Africa    | -               | -           | -             | G4953     | Synthetic | -           | -                           | 24558                     | -        | -        | 11.05      | 38.35      |
| Ethiopia | Africa    | -               | -           | -             | G4954     | Synthetic | -           | -                           | 22233                     | -        | -        | 11.05      | 41.65      |
| Ethiopia | Africa    | -               | -           | -             | G4957     | Synthetic | -           | -                           | 12299                     | -        | -        | 10.95      | 35.25      |
| Ethiopia | Africa    | -               | -           | -             | G4960     | Synthetic | -           | -                           | 161059                    | -        | -        | 10.85      | 35.15      |
| Ethiopia | Africa    | -               | -           | -             | G4965     | Synthetic | -           | -                           | 14800                     | -        | -        | 10.55      | 35.05      |
| Ethiopia | Africa    | -               | -           | -             | G4969     | Synthetic | -           | -                           | 144917                    | -        | -        | 10.45      | 35.25      |
| Ethiopia | Africa    | -               | -           | -             | G4977     | Synthetic | -           | -                           | 47336                     | -        | -        | 10.25      | 38.45      |
| Ethiopia | Africa    | -               | -           | -             | G4979     | Synthetic | -           | -                           | 111852                    | -        | -        | 10.05      | 35.75      |
| Ethiopia | Africa    | -               | -           | -             | G4980     | Synthetic | -           | -                           | 15887                     | -        | -        | 10.05      | 38.35      |
| Ethiopia | Africa    | -               | -           | -             | G4983     | Synthetic | -           | -                           | 27691                     | -        | -        | 9.85       | 35.75      |
| Ethiopia | Africa    | -               | -           | -             | G5056     | Synthetic | -           | -                           | 12421                     | -        | -        | 8.05       | 33.15      |
| Ethiopia | Africa    | -               | -           | -             | G5068     | Synthetic | -           | -                           | 15207                     | -        | -        | 7.65       | 42.05      |
| Ethiopia | Africa    | -               | -           | -             | G5076     | Synthetic | -           | -                           | 41136                     | -        | -        | 7.55       | 41.95      |
| Ethiopia | Africa    | -               | -           | -             | G5081     | Synthetic | -           | -                           | 64089                     | -        | -        | 7.35       | 42.15      |
| Ethiopia | Africa    | -               | -           | -             | G5082     | Synthetic | -           | -                           | 15106                     | -        | -        | 7.35       | 42.25      |

| Country  | Continent | Station Name | River Name  | River Basin | GloFAS ID | Provider  | Provider ID | Catchment Area Provided km² | Catchment Area GloFAS km² | LAT Prov | LON Prov | LAT GloFAS | LON GloFAS |
|----------|-----------|--------------|-------------|-------------|-----------|-----------|-------------|-----------------------------|---------------------------|----------|----------|------------|------------|
| Ethiopia | Africa    | -            | -           | -           | G5115     | Synthetic | -           | -                           | 14663                     | -        | -        | 5.75       | 40.85      |
| Ethiopia | Africa    | -            | -           | -           | G5118     | Synthetic | -           | -                           | 18987                     | -        | -        | 5.65       | 40.85      |
| Ethiopia | Africa    | -            | -           | -           | G5141     | Synthetic | -           | -                           | 56719                     | -        | -        | 4.35       | 41.95      |
| Ethiopia | Africa    | -            | -           | -           | G5142     | Synthetic | -           | -                           | 25392                     | -        | -        | 4.35       | 42.05      |
| Ethiopia | Africa    | -            | -           | -           | G5145     | Synthetic | -           | -                           | 82605                     | -        | -        | 4.25       | 42.05      |
| Ethiopia | Africa    | Abetliti     | Great Ghbe  | Upper Ghibe | G6107     | -         | -           | -                           | 16078                     | 8.2333   | 37.583   | 8.25       | 37.55      |
| Ethiopia | Africa    | Woltkite     | Wabi        | Upper Ghibe | G6108     | -         | -           | -                           | 1964                      | 8.25     | 37.766   | 8.25       | 37.75      |
| Ethiopia | Africa    | Asetndabo    | Gilgel G.   | Upper Ghibe | G6109     | -         | -           | -                           | 3810                      | 7.75     | 37.183   | 7.75       | 37.25      |
| Ethiopia | Africa    | Woltkite     | Walga       | Upper Ghibe | G6110     | -         | -           | -                           | 1840                      | 8.3333   | 37.6     | 8.35       | 37.55      |
| Ethiopia | Africa    | Shetbe       | Gojeb       | Upper Ghibe | G6111     | -         | -           | -                           | 3196                      | 7.4166   | 36.383   | 7.45       | 36.35      |
| Ethiopia | Africa    | Sekta        | Seka        | Upper Ghibe | G6112     | -         | -           | -                           | 861                       | 7.6      | 36.75    | 7.65       | 36.75      |
| Gabon    | Africa    | -            | -           | -           | G5248     | Synthetic | -           | -                           | 62708                     | -        | -        | -0.15      | 12.25      |
| Gabon    | Africa    | -            | -           | -           | G5251     | Synthetic | -           | -                           | 66942                     | -        | -        | -0.25      | 12.15      |
| Gabon    | Africa    | -            | -           | -           | G5267     | Synthetic | -           | -                           | 171563                    | -        | -        | -0.55      | 10.25      |
| Gabon    | Africa    | -            | -           | -           | G5272     | Synthetic | -           | -                           | 33087                     | -        | -        | -0.65      | 10.35      |
| Ghana    | Africa    | Yarugu       | White Volta | Volta       | G1055     | GRDC      | 1531600     | 41550                       | 42282                     | 10.98    | -0.4     | 11.05      | -0.35      |
| Ghana    | Africa    | Nangodi      | Volta Rouge | Volta       | G1056     | GRDC      | 1531650     | 11570                       | 11546                     | 10.866   | -        | 10.65      | -0.55      |
| Ghana    | Africa    | Lawra        | Black Volta | Volta       | G1058     | GRDC      | 1531050     | 93820                       | 86730                     | 10.633   | -        | 10.75      | -2.95      |
| Ghana    | Africa    | Pwalagu      | White Volta | Volta       | G1059     | GRDC      | 1531550     | 63350                       | 58339                     | 10.583   | -0.85    | 10.55      | -0.85      |
| Ghana    | Africa    | Yagaba       | Kulpawn     | Volta       | G1061     | GRDC      | 1531420     | 10600                       | 10133                     | 10.23    | -        | 10.25      | -1.35      |
| Ghana    | Africa    | Nawuni       | White Volta | Volta       | G1064     | GRDC      | 1531450     | 92950                       | 93343                     | 9.7      | -1.08    | 9.75       | -0.95      |
| Ghana    | Africa    | Sabari       | Oti         | Volta       | G1068     | GRDC      | 1531800     | 58670                       | 60465                     | 9.28     | -0.23    | 9.25       | -0.25      |
| Ghana    | Africa    | Bamboi       | Black Volta | Volta       | G1078     | GRDC      | 1531100     | 134200                      | 140787                    | 8.15     | -        | 8.15       | -2.05      |
| Ghana    | Africa    | Daboasi      | Pra         | Pra         | G1108     | GRDC      | 1526300     | 22714                       | 23290                     | 5.1667   | -        | 5.15       | -1.65      |
| Ghana    | Africa    | -            | -           | -           | G5029     | Synthetic | -           | -                           | 111576                    | -        | -        | 8.75       | -1.05      |
| Ghana    | Africa    | -            | -           | -           | G5032     | Synthetic | -           | -                           | 155505                    | -        | -        | 8.65       | -1.05      |
| Ghana    | Africa    | -            | -           | -           | G5096     | Synthetic | -           | -                           | 408487                    | -        | -        | 6.05       | -0.15      |
| Guinea   | Africa    | Kouroussa    | Niger       | Niger       | G1057     | GRDC      | 1634400     | 18000                       | 17346                     | 10.65    | -        | 10.65      | -9.85      |
| Guinea   | Africa    | -            | Milo        | Niger       | G1787     | DFO       | 267         | -                           | 11984                     | 10.664   | -9.224   | 10.65      | -9.25      |
| Kenya    | Africa    | -            | -           | -           | G5170     | Synthetic | -           | -                           | 23746                     | -        | -        | 3.15       | 36.05      |
| Kenya    | Africa    | -            | -           | -           | G5171     | Synthetic | -           | -                           | 17192                     | -        | -        | 2.95       | 36.15      |
| Kenya    | Africa    | -            | -           | -           | G5173     | Synthetic | -           | -                           | 32503                     | -        | -        | 2.85       | 37.45      |
| Kenya    | Africa    | -            | -           | -           | G5197     | Synthetic | -           | -                           | 22512                     | -        | -        | 1.45       | 38.75      |
| Kenya    | Africa    | -            | -           | -           | G5198     | Synthetic | -           | -                           | 12616                     | -        | -        | 1.45       | 38.85      |
| Kenya    | Africa    | -            | -           | -           | G5208     | Synthetic | -           | -                           | 36737                     | -        | -        | 1.15       | 39.25      |
| Kenya    | Africa    | -            | -           | -           | G5210     | Synthetic | -           | -                           | 22260                     | -        | -        | 1.05       | 39.25      |
| Kenya    | Africa    | -            | -           | -           | G5299     | Synthetic | -           | -                           | 15198                     | -        | -        | -0.75      | 37.75      |
| Kenya    | Africa    | -            | -           | -           | G5305     | Synthetic | -           | -                           | 13338                     | -        | -        | -1.55      | 39.95      |
| Kenya    | Africa    | -            | -           | -           | G5326     | Synthetic | -           | -                           | 73147                     | -        | -        | -1.95      | 40.15      |

| Country    | Continent | Station Name            | River Name   | River Basin | GloFAS ID | Provider  | Provider ID | Catchment Area Provided km² | Catchment Area GloFAS km² | LAT Prov | LON Prov | LAT GloFAS | LON GloFAS |
|------------|-----------|-------------------------|--------------|-------------|-----------|-----------|-------------|-----------------------------|---------------------------|----------|----------|------------|------------|
| Kenya      | Africa    | -                       | -            | -           | G5332     | Synthetic | -           | -                           | 12465                     | -        | -        | -2.05      | 40.05      |
| Lesotho    | Africa    | Whitehall 66819304      | Orange       | Orange      | G1469     | GRDC      | 1259151     | 10774                       | 10434                     | -        | 28.508   | -30.05     | 28.25      |
| Lesotho    | Africa    | Seaka Bridge 66819303   | Orange       | Orange      | G1472     | GRDC      | 1259150     | 19756                       | 19972                     | -        | 27.575   | -30.35     | 27.45      |
| Libya      | Africa    | -                       | -            | -           | G4337     | Synthetic | -           | -                           | 30463                     | -        | -        | 30.85      | 15.35      |
| Libya      | Africa    | -                       | -            | -           | G4338     | Synthetic | -           | -                           | 20049                     | -        | -        | 30.85      | 15.45      |
| Libya      | Africa    | -                       | -            | -           | G4414     | Synthetic | -           | -                           | 115714                    | -        | -        | 28.85      | 21.85      |
| Libya      | Africa    | -                       | -            | -           | G4415     | Synthetic | -           | -                           | 182082                    | -        | -        | 28.85      | 21.95      |
| Libya      | Africa    | -                       | -            | -           | G4438     | Synthetic | -           | -                           | 51980                     | -        | -        | 28.15      | 22.25      |
| Libya      | Africa    | -                       | -            | -           | G4442     | Synthetic | -           | -                           | 117272                    | -        | -        | 28.05      | 22.35      |
| Libya      | Africa    | -                       | -            | -           | G4460     | Synthetic | -           | -                           | 47059                     | -        | -        | 27.65      | 22.35      |
| Libya      | Africa    | -                       | -            | -           | G4461     | Synthetic | -           | -                           | 68559                     | -        | -        | 27.65      | 22.45      |
| Libya      | Africa    | -                       | -            | -           | G4463     | Synthetic | -           | -                           | 17557                     | -        | -        | 27.45      | 13.95      |
| Libya      | Africa    | -                       | -            | -           | G4464     | Synthetic | -           | -                           | 46365                     | -        | -        | 27.45      | 14.15      |
| Libya      | Africa    | -                       | -            | -           | G4479     | Synthetic | -           | -                           | 35658                     | -        | -        | 26.95      | 21.85      |
| Libya      | Africa    | -                       | -            | -           | G4480     | Synthetic | -           | -                           | 17217                     | -        | -        | 26.95      | 21.95      |
| Libya      | Africa    | -                       | -            | -           | G4499     | Synthetic | -           | -                           | 15378                     | -        | -        | 26.55      | 21.35      |
| Libya      | Africa    | -                       | -            | -           | G4506     | Synthetic | -           | -                           | 22325                     | -        | -        | 26.45      | 21.35      |
| Libya      | Africa    | -                       | -            | -           | G4535     | Synthetic | -           | -                           | 13143                     | -        | -        | 25.75      | 18.85      |
| Libya      | Africa    | -                       | -            | -           | G4536     | Synthetic | -           | -                           | 66784                     | -        | -        | 25.75      | 19.15      |
| Libya      | Africa    | -                       | -            | -           | G4545     | Synthetic | -           | -                           | 52856                     | -        | -        | 25.65      | 18.85      |
| Libya      | Africa    | -                       | -            | -           | G4546     | Synthetic | -           | -                           | 26607                     | -        | -        | 25.65      | 19.15      |
| Libya      | Africa    | -                       | -            | -           | G4588     | Synthetic | -           | -                           | 64051                     | -        | -        | 24.15      | 23.25      |
| Libya      | Africa    | -                       | -            | -           | G4589     | Synthetic | -           | -                           | 51630                     | -        | -        | 24.15      | 23.35      |
| Libya      | Africa    | -                       | -            | -           | G4598     | Synthetic | -           | -                           | 12620                     | -        | -        | 23.85      | 18.25      |
| Libya      | Africa    | -                       | -            | -           | G4603     | Synthetic | -           | -                           | 13181                     | -        | -        | 23.65      | 17.15      |
| Libya      | Africa    | -                       | -            | -           | G4605     | Synthetic | -           | -                           | 23179                     | -        | -        | 23.55      | 17.15      |
| Madagascar | Africa    | -                       | Mahavavy     | -           | G1916     | DFO       | 1582        | -                           | 2958                      | -        | 49.005   | -13.15     | 49.05      |
| Madagascar | Africa    | -                       | -            | -           | G5678     | Synthetic | -           | -                           | 15933                     | -        | -        | -15.55     | 47.65      |
| Madagascar | Africa    | -                       | -            | -           | G5699     | Synthetic | -           | -                           | 12717                     | -        | -        | -16.45     | 46.75      |
| Madagascar | Africa    | -                       | -            | -           | G5703     | Synthetic | -           | -                           | 39236                     | -        | -        | -16.55     | 46.65      |
| Madagascar | Africa    | -                       | -            | -           | G5710     | Synthetic | -           | -                           | 23359                     | -        | -        | -16.85     | 46.85      |
| Madagascar | Africa    | -                       | -            | -           | G5711     | Synthetic | -           | -                           | 11825                     | -        | -        | -16.85     | 46.95      |
| Madagascar | Africa    | -                       | -            | -           | G5791     | Synthetic | -           | -                           | 16685                     | -        | -        | -19.65     | 45.45      |
| Madagascar | Africa    | -                       | -            | -           | G5797     | Synthetic | -           | -                           | 23961                     | -        | -        | -19.85     | 45.45      |
| Malawi     | Africa    | Phewzi 65312414         | South Rukuru | Zambezi     | G1277     | GRDC      | 1992401     | 11132                       | 11383                     | -10.9    | 34.05    | -10.95     | 33.95      |
| Malawi     | Africa    | S53 Roadbridge 65312601 | Bua          | Zambezi     | G1307     | GRDC      | 1992480     | 10659                       | 10545                     | -        | 34.183   | -12.85     | 34.15      |
| Malawi     | Africa    | -                       | Shire        | Zambezi     | G1724     | DFO       | 56          | -                           | 150488                    | -        | 35.145   | -16.55     | 35.15      |
| Malawi     | Africa    | -                       | Shire        | Zambezi     | G2001     | DFO       | 253         | -                           | 142811                    | -        | 34.965   | -16.25     | 34.95      |
| Mali       | Africa    | Tossaye                 | Niger        | Niger       | G0959     | GRDC      | 1134850     | 348000                      | 342635                    | 16.93    | -0.58    | 16.15      | -3.55      |

| Country | Continent | Station Name  | River Name           | River Basin | GloFAS ID | Provider  | Provider ID | Catchment Area Provided km² | Catchment Area GloFAS km² | LAT Prov | LON Prov | LAT GloFAS | LON GloFAS |
|---------|-----------|---------------|----------------------|-------------|-----------|-----------|-------------|-----------------------------|---------------------------|----------|----------|------------|------------|
| Mali    | Africa    | Koryoume      | Niger                | Niger       | G0960     | GRDC      | 1134730     | 342000                      | 386083                    | 16.666   | -        | 16.65      | -3.05      |
| Mali    | Africa    | Goundam       | Tassakan             | Niger       | G0963     | GRDC      | 1134620     | -                           | 13562                     | 16.42    | -3.65    | 16.45      | -3.65      |
| Mali    | Africa    | Dire          | Niger                | Niger       | G0966     | GRDC      | 1134700     | 340000                      | 364536                    | 16.266   | -        | 16.25      | -3.35      |
| Mali    | Africa    | Tonka         | Niger                | Niger       | G0968     | GRDC      | 1134630     | -                           | 341920                    | 16.13    | -3.75    | 16.15      | -3.75      |
| Mali    | Africa    | Sarafere      | Bara Issa            | Niger       | G0970     | GRDC      | 1134650     | -                           | 19991                     | 15.82    | -3.7     | 15.85      | -3.65      |
| Mali    | Africa    | Ansongo       | Niger                | Niger       | G0976     | GRDC      | 1134900     | 566000                      | 548879                    | 15.666   | -0.5     | 15.65      | -0.45      |
| Mali    | Africa    | Akka          | Niger                | Niger       | G0979     | GRDC      | 1134600     | -                           | 303537                    | 15.4     | -4.23    | 15.45      | -4.25      |
| Mali    | Africa    | Bakel         | Senegal              | Senegal     | G0988     | GRDC      | 1812500     | 218000                      | 253631                    | 14.9     | -12.45   | 14.45      | -11.55     |
| Mali    | Africa    | Nantaka Mopti | Niger                | Niger       | G0994     | GRDC      | 1134500     | 281600                      | 276868                    | 14.53    | -4.22    | 14.65      | -4.15      |
| Mali    | Africa    | Kayes         | Senegal              | Senegal     | G0995     | GRDC      | 1112100     | 157400                      | 148919                    | 14.45    | -11.28   | 14.35      | -11.35     |
| Mali    | Africa    | Kabate        | Kolimbine            | Senegal     | G0998     | GRDC      | 1112110     | 25000                       | 29483                     | 14.31    | -11.13   | 16.75      | -9.05      |
| Mali    | Africa    | Kara          | Diaka                | Niger       | G0999     | GRDC      | 1134420     | -                           | 135146                    | 14.17    | -5.02    | 14.15      | -5.05      |
| Mali    | Africa    | Tilembeya     | Niger                | Niger       | G1000     | GRDC      | 1134460     | 143300                      | 145399                    | 14.15    | -4.98    | 14.25      | -4.55      |
| Mali    | Africa    | Sofara        | Bani                 | Niger       | G1001     | GRDC      | 1134480     | 129000                      | 128944                    | 14.02    | -4.25    | 14.25      | -4.15      |
| Mali    | Africa    | Ke Macina     | Niger                | Niger       | G1002     | GRDC      | 1134400     | 141000                      | 134785                    | 13.95    | -5.37    | 13.95      | -5.25      |
| Mali    | Africa    | Galougo       | Senegal              | Senegal     | G1003     | GRDC      | 1112300     | 127000                      | 141689                    | 13.83    | -11.13   | 13.85      | -10.85     |
| Mali    | Africa    | Kirango Aval  | Niger                | Niger       | G1005     | GRDC      | 1134250     | 137000                      | 133338                    | 13.716   | -6.05    | 13.75      | -6.05      |
| Mali    | Africa    | Toukoto       | Bakoye               | Senegal     | G1009     | GRDC      | 1112340     | 16000                       | 16370                     | 13.45    | -9.88    | 13.35      | -9.75      |
| Mali    | Africa    | Beneny Kegny  | Bani                 | Niger       | G1010     | GRDC      | 1134450     | 116000                      | 113481                    | 13.38    | -4.92    | 13.35      | -4.95      |
| Mali    | Africa    | Oualia        | Bakoye               | Senegal     | G1011     | GRDC      | 1112320     | 84400                       | 91284                     | 13.36    | -9.23    | 13.55      | -9.95      |
| Mali    | Africa    | Siramakana    | Baoule (Trib. Atui)  | Senegal     | G1014     | GRDC      | 1112330     | 58000                       | 60549                     | 13.34    | -9.53    | 14.25      | -9.05      |
| Mali    | Africa    | Gourbassy     | Faleme               | Senegal     | G1015     | GRDC      | 1112200     | 15000                       | 14911                     | 13.23    | -11.38   | 13.15      | -11.55     |
| Mali    | Africa    | Douna         | Bani                 | Niger       | G1016     | GRDC      | 1134300     | 101600                      | 102344                    | 13.216   | -5.9     | 13.25      | -5.85      |
| Mali    | Africa    | Dibia         | Bafing               | Senegal     | G1017     | GRDC      | 1112350     | 33000                       | 34612                     | 13.14    | -10.48   | 13.25      | -10.75     |
| Mali    | Africa    | Koulikoro     | Niger                | Niger       | G1023     | GRDC      | 1134100     | 120000                      | 119316                    | 12.866   | -7.55    | 12.85      | -7.55      |
| Mali    | Africa    | Dioila        | Baoule (Trib. Niger) | Niger       | G1029     | GRDC      | 1134200     | 32500                       | 31891                     | 12.52    | -6.8     | 12.55      | -6.65      |
| Mali    | Africa    | Bafing Makana | Bafing               | Senegal     | G1034     | GRDC      | 1112500     | 21700                       | 21658                     | 12.33    | -10.16   | 12.35      | -10.35     |
| Mali    | Africa    | Daka Saydou   | Bafing               | Senegal     | G1037     | GRDC      | 1112480     | 15500                       | 15710                     | 12.15    | -10.2    | 11.75      | -10.75     |
| Mali    | Africa    | Kouoro 2      | Banifing             | Niger       | G1040     | GRDC      | 1134310     | 14300                       | 14584                     | 12.02    | -6.68    | 11.95      | -5.65      |
| Mali    | Africa    | Gouala        | Sankarani            | Niger       | G1041     | GRDC      | 1134040     | 35300                       | 33713                     | 11.97    | -8.23    | 11.95      | -8.25      |
| Mali    | Africa    | Banankoro     | Niger                | Niger       | G1046     | GRDC      | 1134030     | 71750                       | 71518                     | 11.683   | -        | 11.65      | -8.65      |
| Mali    | Africa    | Selingue      | Sankarani            | Niger       | G1048     | GRDC      | 1134050     | 34200                       | 33227                     | 11.58    | -8.17    | 11.85      | -8.15      |
| Mali    | Africa    | Pankourou     | Bagoe                | Niger       | G1049     | GRDC      | 1134220     | 31800                       | 31482                     | 11.42    | -6.57    | 11.35      | -6.55      |
| Mali    | Africa    | Bougouni      | Baoule (Trib. Niger) | Niger       | G1050     | GRDC      | 1134110     | 15700                       | 14890                     | 11.4     | -7.45    | 11.45      | -7.35      |
| Mali    | Africa    | -             | Niger                | Niger       | G1784     | DFO       | 262         | -                           | 364298                    | 16.154   | -3.464   | 16.15      | -3.45      |
| Mali    | Africa    | -             | Niger                | Niger       | G1785     | DFO       | 263         | -                           | 444563                    | 16.604   | -0.224   | 16.65      | -0.25      |
| Mali    | Africa    | -             | Niger                | Niger       | G1786     | DFO       | 265         | -                           | 131768                    | 13.364   | -6.524   | 13.35      | -6.45      |
| Mali    | Africa    | -             | -                    | -           | G4726     | Synthetic | -           | -                           | 15981                     | -        | -        | 19.45      | -3.45      |
| Mali    | Africa    | -             | -                    | -           | G4729     | Synthetic | -           | -                           | 50760                     | -        | -        | 19.35      | -3.25      |

| Country    | Continent | Station Name          | River Name | River Basin | GloFAS ID | Provider  | Provider ID | Catchment Area Provided km² | Catchment Area GloFAS km² | LAT Prov | LON Prov | LAT GloFAS | LON GloFAS |
|------------|-----------|-----------------------|------------|-------------|-----------|-----------|-------------|-----------------------------|---------------------------|----------|----------|------------|------------|
| Mali       | Africa    | -                     | -          | -           | G4730     | Synthetic | -           | -                           | 18431                     | -        | -        | 19.35      | -3.05      |
| Mali       | Africa    | -                     | -          | -           | G4731     | Synthetic | -           | -                           | 12549                     | -        | -        | 19.25      | -3.75      |
| Mali       | Africa    | -                     | -          | -           | G4732     | Synthetic | -           | -                           | 32434                     | -        | -        | 19.25      | -3.55      |
| Mali       | Africa    | -                     | -          | -           | G4733     | Synthetic | -           | -                           | 19651                     | -        | -        | 19.15      | -3.75      |
| Mali       | Africa    | -                     | -          | -           | G4734     | Synthetic | -           | -                           | 16265                     | -        | -        | 19.15      | -0.55      |
| Mali       | Africa    | -                     | -          | -           | G4740     | Synthetic | -           | -                           | 12614                     | -        | -        | 19.05      | -0.45      |
| Mali       | Africa    | -                     | -          | -           | G4782     | Synthetic | -           | -                           | 48520                     | -        | -        | 18.05      | -0.45      |
| Mali       | Africa    | -                     | -          | -           | G4791     | Synthetic | -           | -                           | 14407                     | -        | -        | 17.95      | -0.55      |
| Mali       | Africa    | -                     | -          | -           | G4816     | Synthetic | -           | -                           | 28535                     | -        | -        | 17.35      | 4.15       |
| Mali       | Africa    | -                     | -          | -           | G4829     | Synthetic | -           | -                           | 410335                    | -        | -        | 16.95      | -1.45      |
| Mali       | Africa    | -                     | -          | -           | G4830     | Synthetic | -           | -                           | 14196                     | -        | -        | 16.95      | -1.35      |
| Mali       | Africa    | -                     | -          | -           | G4842     | Synthetic | -           | -                           | 49861                     | -        | -        | 16.65      | -4.95      |
| Mali       | Africa    | -                     | -          | -           | G4845     | Synthetic | -           | -                           | 23086                     | -        | -        | 16.55      | -5.05      |
| Mali       | Africa    | -                     | -          | -           | G4850     | Synthetic | -           | -                           | 74666                     | -        | -        | 16.45      | -0.05      |
| Mali       | Africa    | -                     | -          | -           | G4851     | Synthetic | -           | -                           | 13190                     | -        | -        | 16.45      | -0.15      |
| Mali       | Africa    | -                     | -          | -           | G4857     | Synthetic | -           | -                           | 447540                    | -        | -        | 16.35      | -0.05      |
| Mali       | Africa    | -                     | -          | -           | G4859     | Synthetic | -           | -                           | 88333                     | -        | -        | 16.25      | -0.05      |
| Mali       | Africa    | -                     | -          | -           | G4872     | Synthetic | -           | -                           | 33604                     | -        | -        | 15.65      | -4.55      |
| Mali       | Africa    | -                     | -          | -           | G4880     | Synthetic | -           | -                           | 299840                    | -        | -        | 14.75      | -12.15     |
| Mali       | Africa    | -                     | -          | -           | G4881     | Synthetic | -           | -                           | 42484                     | -        | -        | 14.75      | -11.95     |
| Mali       | Africa    | -                     | -          | -           | G4883     | Synthetic | -           | -                           | 256636                    | -        | -        | 14.65      | -11.95     |
| Mali       | Africa    | -                     | -          | -           | G4886     | Synthetic | -           | -                           | 37743                     | -        | -        | 14.45      | -8.85      |
| Mali       | Africa    | -                     | -          | -           | G4890     | Synthetic | -           | -                           | 18721                     | -        | -        | 14.35      | -8.85      |
| Mali       | Africa    | -                     | -          | -           | G4930     | Synthetic | -           | -                           | 19922                     | -        | -        | 12.65      | -6.45      |
| Morocco    | Africa    | -                     | -          | -           | G4195     | Synthetic | -           | -                           | 25882                     | -        | -        | 34.55      | -6.35      |
| Morocco    | Africa    | -                     | -          | -           | G4199     | Synthetic | -           | -                           | 29660                     | -        | -        | 34.45      | -3.15      |
| Morocco    | Africa    | -                     | -          | -           | G4200     | Synthetic | -           | -                           | 19084                     | -        | -        | 34.45      | -2.95      |
| Morocco    | Africa    | -                     | -          | -           | G4341     | Synthetic | -           | -                           | 11439                     | -        | -        | 30.75      | -4.55      |
| Morocco    | Africa    | -                     | -          | -           | G4342     | Synthetic | -           | -                           | 12844                     | -        | -        | 30.75      | -4.45      |
| Mauritania | Africa    | -                     | -          | -           | G4746     | Synthetic | -           | -                           | 21118                     | -        | -        | 18.85      | -12.15     |
| Mauritania | Africa    | -                     | -          | -           | G4752     | Synthetic | -           | -                           | 31890                     | -        | -        | 18.75      | -12.15     |
| Mauritania | Africa    | -                     | -          | -           | G4861     | Synthetic | -           | -                           | 21427                     | -        | -        | 16.15      | -13.45     |
| Mozambique | Africa    | Est Nairoto Montepuz  | Messalo    | Messalo     | G1304     | GRDC      | 1889100     | 10450                       | 10327                     | -        | 39       | -12.55     | 39.05      |
| Mozambique | Africa    | Matundo Cais 58316087 | Zambezi    | Zambezi     | G1363     | GRDC      | 1891500     | 940000                      | 989851                    | -16.15   | 33.591   | -15.65     | 30.55      |
| Mozambique | Africa    | Combomune 58510033    | Limpopo    | Limpopo     | G1426     | GRDC      | 1896502     | 266350                      | 327729                    | -        | 32.433   | -24.15     | 32.65      |
| Mozambique | Africa    | Sicacate 58510036     | Limpopo    | Limpopo     | G1431     | GRDC      | 1896501     | 416522                      | 388820                    | -        | 33.543   | -24.85     | 33.55      |
| Mozambique | Africa    | Ressano Garcia C F    | Incomati   | Incomati    | G1437     | GRDC      | 1897501     | 217773                      | 20637                     | -        | 31.936   | -25.45     | 31.95      |
| Mozambique | Africa    | -                     | Pungue     | -           | G1782     | DFO       | 260         | -                           | 25477                     | -        | 34.515   | -19.35     | 34.55      |
| Mozambique | Africa    | -                     | Limpopo    | Limpopo     | G1889     | DFO       | 1247        | -                           | 328159                    | -        | 32.895   | -24.45     | 32.85      |



| Country    | Continent | Station Name           | River Name         | River Basin | GloFAS ID | Provider  | Provider ID | Catchment Area Provided km² | Catchment Area GloFAS km² | LAT Prov | LON Prov | LAT GloFAS | LON GloFAS |
|------------|-----------|------------------------|--------------------|-------------|-----------|-----------|-------------|-----------------------------|---------------------------|----------|----------|------------|------------|
| Mozambique | Africa    | -                      | Limpopo            | Limpopo     | G1890     | DFO       | 1251        | -                           | 248554                    | -        | 32.445   | -23.55     | 32.45      |
| Mozambique | Africa    | -                      | -                  | -           | G5603     | Synthetic | -           | -                           | 59600                     | -        | -        | -11.55     | 38.45      |
| Mozambique | Africa    | -                      | -                  | -           | G5669     | Synthetic | -           | -                           | 15050                     | -        | -        | -15.35     | 32.85      |
| Mozambique | Africa    | -                      | -                  | -           | G5670     | Synthetic | -           | -                           | 13177                     | -        | -        | -15.35     | 32.95      |
| Mozambique | Africa    | -                      | -                  | -           | G5674     | Synthetic | -           | -                           | 28461                     | -        | -        | -15.45     | 32.95      |
| Mozambique | Africa    | -                      | -                  | -           | G5677     | Synthetic | -           | -                           | 1048350                   | -        | -        | -15.55     | 32.85      |
| Mozambique | Africa    | -                      | -                  | -           | G5693     | Synthetic | -           | -                           | 1086730                   | -        | -        | -16.25     | 33.65      |
| Mozambique | Africa    | -                      | -                  | -           | G5694     | Synthetic | -           | -                           | 16981                     | -        | -        | -16.25     | 33.75      |
| Mozambique | Africa    | -                      | -                  | -           | G5697     | Synthetic | -           | -                           | 1103950                   | -        | -        | -16.35     | 33.75      |
| Mozambique | Africa    | -                      | -                  | -           | G5698     | Synthetic | -           | -                           | 53578                     | -        | -        | -16.45     | 33.75      |
| Mozambique | Africa    | -                      | -                  | -           | G5701     | Synthetic | -           | -                           | 11722                     | -        | -        | -16.55     | 33.15      |
| Mozambique | Africa    | -                      | -                  | -           | G5702     | Synthetic | -           | -                           | 33769                     | -        | -        | -16.55     | 33.35      |
| Mozambique | Africa    | -                      | -                  | -           | G5707     | Synthetic | -           | -                           | 21002                     | -        | -        | -16.65     | 33.15      |
| Mozambique | Africa    | -                      | -                  | -           | G5708     | Synthetic | -           | -                           | 18533                     | -        | -        | -16.65     | 33.35      |
| Mozambique | Africa    | -                      | -                  | -           | G5734     | Synthetic | -           | -                           | 1183300                   | -        | -        | -17.75     | 35.25      |
| Mozambique | Africa    | -                      | -                  | -           | G5735     | Synthetic | -           | -                           | 159279                    | -        | -        | -17.75     | 35.45      |
| Mozambique | Africa    | -                      | -                  | -           | G5864     | Synthetic | -           | -                           | 230391                    | -        | -        | -22.55     | 31.65      |
| Mozambique | Africa    | -                      | -                  | -           | G5865     | Synthetic | -           | -                           | 14230                     | -        | -        | -22.55     | 31.75      |
| Mozambique | Africa    | -                      | -                  | -           | G5908     | Synthetic | -           | -                           | 58626                     | -        | -        | -24.65     | 33.45      |
| Namibia    | Africa    | Ruacana 64740001       | Cunene- unene      | Cunene      | G1372     | GRDC      | 1255100     | 91815                       | 85253                     | -17.4    | 14.216   | -17.45     | 14.15      |
| Namibia    | Africa    | Katima Mulilo 64370001 | Zambezi            | Zambezi     | G1373     | GRDC      | 1291100     | 339521                      | 331113                    | -        | 24.3     | -17.45     | 24.35      |
| Namibia    | Africa    | Kongola                | Kwando             | Zambezi     | G1378     | GRDC      | 1291200     | 170000                      | 110835                    | -        | 23.34    | -17.65     | 23.35      |
| Namibia    | Africa    | Rundu 64932101         | Okavango - Cubango | Okavango    | G1381     | GRDC      | 1257100     | 104058                      | 100280                    | -17.9    | 19.766   | -17.85     | 19.65      |
| Namibia    | Africa    | Sesfontein             | Hoanib             | -           | G1391     | GRDC      | 1258100     | 11000                       | 11016                     | -        | 13.566   | -19.25     | 13.55      |
| Namibia    | Africa    | Vingerklip 64734002    | Ugab               | -           | G1404     | GRDC      | 1258200     | 14290                       | 14721                     | -        | 15.466   | -20.45     | 15.45      |
| Namibia    | Africa    | Ugab Slab 64734003     | Ugab               | -           | G1406     | GRDC      | 1258201     | 29139                       | 28916                     | -        | 13.8     | -21.15     | 13.75      |
| Namibia    | Africa    | Rooibank 64731011      | Kuiseb             | -           | G1422     | GRDC      | 1258503     | 14882                       | 15477                     | -        | 14.65    | -23.25     | 14.75      |
| Namibia    | Africa    | Gobabeb                | Kuiseb             | -           | G1427     | GRDC      | 1258500     | 11770                       | 11883                     | -23.5    | 14.966   | -23.65     | 15.15      |
| Namibia    | Africa    | Gochas                 | Auob               | Orange      | G1434     | GRDC      | 1259350     | 19600                       | 20542                     | -        | 18.883   | -24.45     | 18.55      |
| Namibia    | Africa    | Tses 64812009          | Fish               | Orange      | G1441     | GRDC      | 1259102     | 37950                       | 36476                     | -25.9    | 17.983   | -26.05     | 17.85      |
| Namibia    | Africa    | Seeheim 64812008       | Fish               | Orange      | G1444     | GRDC      | 1259101     | 46852                       | 44978                     | -        | 17.08    | -26.85     | 17.75      |
| Namibia    | Africa    | Ai Ais 64812014        | Fish               | Orange      | G1453     | GRDC      | 1259100     | 63940                       | 60457                     | -        | 17.483   | -27.95     | 17.45      |
| Namibia    | Africa    | -                      | Zambezi            | Zambezi     | G1727     | DFO       | 64          | -                           | 331689                    | -        | 24.615   | -17.55     | 24.65      |
| Namibia    | Africa    | -                      | Chobe              | Zambezi     | G1790     | DFO       | 275         | -                           | 150167                    | -        | 24.615   | -18.05     | 24.55      |
| Namibia    | Africa    | -                      | Okavango - Cubango | Okavango    | G1979     | DFO       | 14973       | -                           | 100280                    | -        | 19.62    | -17.85     | 19.65      |
| Namibia    | Africa    | -                      | -                  | -           | G5731     | Synthetic | -           | -                           | 356094                    | -        | -        | -17.65     | 25.05      |
| Namibia    | Africa    | -                      | -                  | -           | G5747     | Synthetic | -           | -                           | 58133                     | -        | -        | -18.05     | 20.35      |
| Namibia    | Africa    | -                      | -                  | -           | G5753     | Synthetic | -           | -                           | 19545                     | -        | -        | -18.35     | 16.05      |
| Namibia    | Africa    | -                      | -                  | -           | G5756     | Synthetic | -           | -                           | 26014                     | -        | -        | -18.45     | 15.85      |

| Country | Continent | Station Name   | River Name | River Basin | GloFAS ID | Provider  | Provider ID | Catchment Area Provided km² | Catchment Area GloFAS km² | LAT Prov | LON Prov | LAT GloFAS | LON GloFAS |
|---------|-----------|----------------|------------|-------------|-----------|-----------|-------------|-----------------------------|---------------------------|----------|----------|------------|------------|
| Namibia | Africa    | -              | -          | -           | G5757     | Synthetic | -           | -                           | 46436                     | -        | -        | -18.45     | 15.95      |
| Namibia | Africa    | -              | -          | -           | G5758     | Synthetic | -           | -                           | 16263                     | -        | -        | -18.45     | 16.15      |
| Namibia | Africa    | -              | -          | -           | G5762     | Synthetic | -           | -                           | 72792                     | -        | -        | -18.55     | 15.95      |
| Namibia | Africa    | -              | -          | -           | G5763     | Synthetic | -           | -                           | 36151                     | -        | -        | -18.55     | 16.05      |
| Namibia | Africa    | -              | -          | -           | G5770     | Synthetic | -           | -                           | 109628                    | -        | -        | -18.75     | 16.05      |
| Namibia | Africa    | -              | -          | -           | G5773     | Synthetic | -           | -                           | 46585                     | -        | -        | -18.85     | 16.25      |
| Namibia | Africa    | -              | -          | -           | G5906     | Synthetic | -           | -                           | 10995                     | -        | -        | -24.55     | 19.75      |
| Namibia | Africa    | -              | -          | -           | G5907     | Synthetic | -           | -                           | 25413                     | -        | -        | -24.65     | 19.65      |
| Namibia | Africa    | -              | -          | -           | G5922     | Synthetic | -           | -                           | 13567                     | -        | -        | -25.35     | 19.35      |
| Namibia | Africa    | -              | -          | -           | G5925     | Synthetic | -           | -                           | 23211                     | -        | -        | -25.45     | 19.35      |
| Niger   | Africa    | Alcongui       | Gorouol    | Niger       | G0990     | GRDC      | 1234080     | 44900                       | 43322                     | 14.75    | -0.6     | 14.85      | -0.25      |
| Niger   | Africa    | Kandadji       | Niger      | Niger       | G0991     | GRDC      | 1234090     | -                           | 616202                    | 14.616   | -        | 14.65      | -0.95      |
| Niger   | Africa    | Garbé Kourou   | Sirba      | Niger       | G1004     | GRDC      | 1234130     | 38750                       | 38917                     | 13.733   | 1.6167   | 13.65      | 1.45       |
| Niger   | Africa    | Niamey         | Niger      | Niger       | G1007     | GRDC      | 1234150     | 700000                      | 686808                    | 13.52    | 2.08     | 13.55      | 2.05       |
| Niger   | Africa    | Diongore Amont | Goroubi    | Niger       | G1020     | GRDC      | 1234180     | 15350                       | 15498                     | 12.96    | 2.32     | 12.95      | 2.15       |
| Niger   | Africa    | W              | Niger      | Niger       | G1028     | GRDC      | 1234201     | -                           | 735590                    | 12.583   | 2.6167   | 12.55      | 2.65       |
| Niger   | Africa    | -              | Niger      | Niger       | G1894     | DFO       | 1418        | -                           | 1373360                   | 11.834   | 3.555    | 11.75      | 3.55       |
| Niger   | Africa    | -              | -          | -           | G4670     | Synthetic | -           | -                           | 50206                     | -        | -        | 21.35      | 10.95      |
| Niger   | Africa    | -              | -          | -           | G4671     | Synthetic | -           | -                           | 28977                     | -        | -        | 21.35      | 11.05      |
| Niger   | Africa    | -              | -          | -           | G4690     | Synthetic | -           | -                           | 13936                     | -        | -        | 20.85      | 7.55       |
| Niger   | Africa    | -              | -          | -           | G4699     | Synthetic | -           | -                           | 90999                     | -        | -        | 20.45      | 11.35      |
| Niger   | Africa    | -              | -          | -           | G4700     | Synthetic | -           | -                           | 14753                     | -        | -        | 20.45      | 11.45      |
| Niger   | Africa    | -              | -          | -           | G4714     | Synthetic | -           | -                           | 36549                     | -        | -        | 19.85      | 10.95      |
| Niger   | Africa    | -              | -          | -           | G4718     | Synthetic | -           | -                           | 84773                     | -        | -        | 19.75      | 6.25       |
| Niger   | Africa    | -              | -          | -           | G4721     | Synthetic | -           | -                           | 33902                     | -        | -        | 19.65      | 10.95      |
| Niger   | Africa    | -              | -          | -           | G4722     | Synthetic | -           | -                           | 71035                     | -        | -        | 19.65      | 11.05      |
| Niger   | Africa    | -              | -          | -           | G4723     | Synthetic | -           | -                           | 118447                    | -        | -        | 19.65      | 11.25      |
| Niger   | Africa    | -              | -          | -           | G4744     | Synthetic | -           | -                           | 27978                     | -        | -        | 18.95      | 4.95       |
| Niger   | Africa    | -              | -          | -           | G4747     | Synthetic | -           | -                           | 13322                     | -        | -        | 18.85      | 4.95       |
| Niger   | Africa    | -              | -          | -           | G4753     | Synthetic | -           | -                           | 43534                     | -        | -        | 18.75      | 5.35       |
| Niger   | Africa    | -              | -          | -           | G4754     | Synthetic | -           | -                           | 17882                     | -        | -        | 18.75      | 5.45       |
| Niger   | Africa    | -              | -          | -           | G4755     | Synthetic | -           | -                           | 16147                     | -        | -        | 18.75      | 6.55       |
| Niger   | Africa    | -              | -          | -           | G4756     | Synthetic | -           | -                           | 30779                     | -        | -        | 18.75      | 6.65       |
| Niger   | Africa    | -              | -          | -           | G4768     | Synthetic | -           | -                           | 48104                     | -        | -        | 18.35      | 6.35       |
| Niger   | Africa    | -              | -          | -           | G4778     | Synthetic | -           | -                           | 63654                     | -        | -        | 18.15      | 5.35       |
| Niger   | Africa    | -              | -          | -           | G4779     | Synthetic | -           | -                           | 15227                     | -        | -        | 18.15      | 5.55       |
| Niger   | Africa    | -              | -          | -           | G4780     | Synthetic | -           | -                           | 107981                    | -        | -        | 18.15      | 6.05       |
| Niger   | Africa    | -              | -          | -           | G4783     | Synthetic | -           | -                           | 242658                    | -        | -        | 18.05      | 5.45       |
| Niger   | Africa    | -              | -          | -           | G4784     | Synthetic | -           | -                           | 227195                    | -        | -        | 18.05      | 5.55       |

| Country | Continent | Station Name | River Name    | River Basin | GloFAS ID | Provider  | Provider ID | Catchment Area Provided km² | Catchment Area GloFAS km² | LAT Prov | LON Prov | LAT GloFAS | LON GloFAS |
|---------|-----------|--------------|---------------|-------------|-----------|-----------|-------------|-----------------------------|---------------------------|----------|----------|------------|------------|
| Niger   | Africa    | -            | -             | -           | G4785     | Synthetic | -           | -                           | 214011                    | -        | -        | 18.05      | 5.85       |
| Niger   | Africa    | -            | -             | -           | G4786     | Synthetic | -           | -                           | 64984                     | -        | -        | 18.05      | 6.05       |
| Niger   | Africa    | -            | -             | -           | G4792     | Synthetic | -           | -                           | 17851                     | -        | -        | 17.95      | 4.95       |
| Niger   | Africa    | -            | -             | -           | G4793     | Synthetic | -           | -                           | 307376                    | -        | -        | 17.95      | 5.15       |
| Niger   | Africa    | -            | -             | -           | G4794     | Synthetic | -           | -                           | 40455                     | -        | -        | 17.95      | 6.05       |
| Niger   | Africa    | -            | -             | -           | G4809     | Synthetic | -           | -                           | 17365                     | -        | -        | 17.45      | 4.25       |
| Niger   | Africa    | -            | -             | -           | G4810     | Synthetic | -           | -                           | 329015                    | -        | -        | 17.45      | 4.45       |
| Niger   | Africa    | -            | -             | -           | G4817     | Synthetic | -           | -                           | 348277                    | -        | -        | 17.35      | 4.25       |
| Niger   | Africa    | -            | -             | -           | G4862     | Synthetic | -           | -                           | 26914                     | -        | -        | 16.15      | 11.25      |
| Niger   | Africa    | -            | -             | -           | G4865     | Synthetic | -           | -                           | 22128                     | -        | -        | 15.95      | 11.25      |
| Niger   | Africa    | -            | -             | -           | G4876     | Synthetic | -           | -                           | 399782                    | -        | -        | 15.25      | 3.35       |
| Niger   | Africa    | -            | -             | -           | G4877     | Synthetic | -           | -                           | 38540                     | -        | -        | 15.25      | 3.45       |
| Niger   | Africa    | -            | -             | -           | G4891     | Synthetic | -           | -                           | 20016                     | -        | -        | 14.35      | 12.95      |
| Niger   | Africa    | -            | -             | -           | G4893     | Synthetic | -           | -                           | 16444                     | -        | -        | 14.25      | 12.95      |
| Niger   | Africa    | -            | -             | -           | G4898     | Synthetic | -           | -                           | 12270                     | -        | -        | 13.95      | 7.75       |
| Niger   | Africa    | -            | -             | -           | G4901     | Synthetic | -           | -                           | 41614                     | -        | -        | 13.85      | 2.95       |
| Niger   | Africa    | -            | -             | -           | G4902     | Synthetic | -           | -                           | 464940                    | -        | -        | 13.85      | 3.05       |
| Niger   | Africa    | -            | -             | -           | G4903     | Synthetic | -           | -                           | 12205                     | -        | -        | 13.85      | 7.85       |
| Niger   | Africa    | -            | -             | -           | G4904     | Synthetic | -           | -                           | 23116                     | -        | -        | 13.75      | 13.25      |
| Niger   | Africa    | Bossé bangou | Sirba         | Niger       | G4912     | DIST      | 2           | 37000                       | 37227                     | 13.353   | 1.2874   | 13.35      | 1.25       |
| Niger   | Africa    | -            | -             | -           | G4918     | Synthetic | -           | -                           | 707847                    | -        | -        | 13.05      | 2.35       |
| Niger   | Africa    | -            | -             | -           | G4921     | Synthetic | -           | -                           | 135169                    | -        | -        | 13.05      | 12.35      |
| Niger   | Africa    | -            | -             | -           | G4934     | Synthetic | -           | -                           | 521522                    | -        | -        | 12.45      | 2.85       |
| Nigeria | Africa    | Geidam       | Yobe          | Lake Chad   | G1019     | GRDC      | 1837106     | 67340                       | 67412                     | 12.989   | 11.970   | 13.05      | 11.65      |
| Nigeria | Africa    | Gashua       | Yobe          | Lake Chad   | G1024     | GRDC      | 1837107     | 62150                       | 57501                     | 12.861   | 11.045   | 12.85      | 11.85      |
| Nigeria | Africa    | Kasaga       | Marma Channel | Lake Chad   | G1026     | GRDC      | 1837561     | -                           | 32546                     | 12.804   | 10.386   | 12.85      | 10.35      |
| Nigeria | Africa    | Likori       | Marma Channel | Lake Chad   | G1027     | GRDC      | 1837560     | -                           | 22735                     | 12.636   | 10.303   | 12.55      | 10.35      |
| Nigeria | Africa    | Dapchi       | Komadugu Gana | Lake Chad   | G1031     | GRDC      | 1837200     | 14504                       | 14838                     | 12.493   | 11.507   | 12.65      | 11.75      |
| Nigeria | Africa    | Hadejia      | Hadejia       | Lake Chad   | G1032     | GRDC      | 1837401     | 30435                       | 22250                     | 12.440   | 10.030   | 12.45      | 10.05      |
| Nigeria | Africa    | Katagum      | Jama'are      | Lake Chad   | G1035     | GRDC      | 1837250     | 15000                       | 14132                     | 12.280   | 10.367   | 12.25      | 10.35      |
| Nigeria | Africa    | Kafin Hausa  | Kafin Hausa   | Lake Chad   | G1036     | GRDC      | 1837420     | -                           | 22129                     | 12.260   | 9.9183   | 12.35      | 9.95       |
| Nigeria | Africa    | Wudil        | Hadejia       | Lake Chad   | G1043     | GRDC      | 1837410     | 16380                       | 16420                     | 11.797   | 8.8341   | 11.75      | 8.75       |
| Nigeria | Africa    | Yidere Bode  | Niger         | Niger       | G1051     | GRDC      | 1834110     | -                           | 1565480                   | 11.383   | 4.1333   | 11.35      | 4.15       |
| Nigeria | Africa    | Ibi          | Benue         | Niger       | G1077     | GRDC      | 1835900     | -                           | 261126                    | 8.2      | 9.7333   | 8.15       | 9.75       |
| Nigeria | Africa    | Lokoja       | Niger         | Niger       | G1083     | GRDC      | 1834101     | -                           | 2094830                   | 7.8      | 6.7667   | 7.75       | 6.75       |
| Nigeria | Africa    | -            | Niger         | Niger       | G1895     | DFO       | 1419        | -                           | 1381880                   | 11.474   | 4.095    | 11.45      | 4.05       |
| Nigeria | Africa    | -            | Niger         | Niger       | G1896     | DFO       | 1420        | -                           | 1567550                   | 11.204   | 4.365    | 11.15      | 4.35       |
| Nigeria | Africa    | -            | Niger         | Niger       | G1897     | DFO       | 1432        | -                           | 1638670                   | 9.044    | 5.175    | 9.05       | 5.15       |
| Nigeria | Africa    | -            | Niger         | Niger       | G1898     | DFO       | 1437        | -                           | 2120920                   | 6.254    | 6.705    | 6.25       | 6.75       |

| Country             | Continent | Station Name        | River Name | River Basin | GloFAS ID | Provider  | Provider ID | Catchment Area Provided km² | Catchment Area GloFAS km² | LAT Prov | LON Prov | LAT GloFAS | LON GloFAS |
|---------------------|-----------|---------------------|------------|-------------|-----------|-----------|-------------|-----------------------------|---------------------------|----------|----------|------------|------------|
| Nigeria             | Africa    | -                   | Anambra    | Niger       | G1899     | DFO       | 1438        | -                           | 8736                      | 6.524    | 6.885    | 6.55       | 6.85       |
| Nigeria             | Africa    | -                   | Benue      | Niger       | G1900     | DFO       | 1441        | -                           | 301938                    | 7.784    | 8.865    | 7.75       | 8.85       |
| Nigeria             | Africa    | -                   | -          | -           | G4905     | Synthetic | -           | -                           | 47488                     | -        | -        | 13.65      | 5.75       |
| Nigeria             | Africa    | -                   | -          | -           | G4906     | Synthetic | -           | -                           | 154359                    | -        | -        | 13.65      | 13.25      |
| Nigeria             | Africa    | -                   | -          | -           | G4908     | Synthetic | -           | -                           | 87746                     | -        | -        | 13.55      | 5.75       |
| Nigeria             | Africa    | -                   | -          | -           | G4909     | Synthetic | -           | -                           | 40137                     | -        | -        | 13.55      | 5.85       |
| Nigeria             | Africa    | -                   | -          | -           | G4913     | Synthetic | -           | -                           | 30626                     | -        | -        | 13.45      | 5.75       |
| Nigeria             | Africa    | -                   | -          | -           | G4917     | Synthetic | -           | -                           | 125247                    | -        | -        | 13.15      | 5.25       |
| Nigeria             | Africa    | -                   | -          | -           | G4919     | Synthetic | -           | -                           | 12844                     | -        | -        | 13.05      | 5.25       |
| Nigeria             | Africa    | -                   | -          | -           | G4920     | Synthetic | -           | -                           | 44146                     | -        | -        | 13.05      | 11.45      |
| Nigeria             | Africa    | -                   | -          | -           | G4922     | Synthetic | -           | -                           | 16412                     | -        | -        | 12.95      | 12.35      |
| Nigeria             | Africa    | -                   | -          | -           | G4924     | Synthetic | -           | -                           | 13564                     | -        | -        | 12.85      | 9.85       |
| Nigeria             | Africa    | -                   | -          | -           | G4927     | Synthetic | -           | -                           | 23461                     | -        | -        | 12.75      | 10.65      |
| Nigeria             | Africa    | -                   | -          | -           | G4932     | Synthetic | -           | -                           | 24462                     | -        | -        | 12.65      | 10.65      |
| Nigeria             | Africa    | -                   | -          | -           | G4933     | Synthetic | -           | -                           | 28274                     | -        | -        | 12.55      | 13.45      |
| Nigeria             | Africa    | -                   | -          | -           | G4935     | Synthetic | -           | -                           | 12891                     | -        | -        | 12.45      | 13.55      |
| Nigeria             | Africa    | -                   | -          | -           | G4938     | Synthetic | -           | -                           | 152623                    | -        | -        | 12.15      | 3.95       |
| Nigeria             | Africa    | -                   | -          | -           | G4939     | Synthetic | -           | -                           | 17113                     | -        | -        | 12.15      | 4.15       |
| Nigeria             | Africa    | -                   | -          | -           | G4978     | Synthetic | -           | -                           | 39286                     | -        | -        | 10.05      | 11.85      |
| Nigeria             | Africa    | -                   | -          | -           | G4989     | Synthetic | -           | -                           | 17319                     | -        | -        | 9.65       | 5.85       |
| Nigeria             | Africa    | -                   | -          | -           | G4990     | Synthetic | -           | -                           | 43204                     | -        | -        | 9.65       | 5.95       |
| Nigeria             | Africa    | -                   | -          | -           | G4993     | Synthetic | -           | -                           | 53811                     | -        | -        | 9.55       | 12.05      |
| Nigeria             | Africa    | -                   | -          | -           | G4994     | Synthetic | -           | -                           | 112991                    | -        | -        | 9.55       | 12.15      |
| Nigeria             | Africa    | -                   | -          | -           | G5024     | Synthetic | -           | -                           | 1647870                   | -        | -        | 8.85       | 5.65       |
| Nigeria             | Africa    | -                   | -          | -           | G5025     | Synthetic | -           | -                           | 65786                     | -        | -        | 8.85       | 5.85       |
| Nigeria             | Africa    | -                   | -          | -           | G5026     | Synthetic | -           | -                           | 15036                     | -        | -        | 8.85       | 10.75      |
| Nigeria             | Africa    | -                   | -          | -           | G5027     | Synthetic | -           | -                           | 181987                    | -        | -        | 8.85       | 10.95      |
| Nigeria             | Africa    | -                   | -          | -           | G5030     | Synthetic | -           | -                           | 1715500                   | -        | -        | 8.75       | 6.15       |
| Nigeria             | Africa    | -                   | -          | -           | G5033     | Synthetic | -           | -                           | 204991                    | -        | -        | 8.65       | 10.35      |
| Nigeria             | Africa    | -                   | -          | -           | G5039     | Synthetic | -           | -                           | 22238                     | -        | -        | 8.55       | 10.35      |
| Nigeria             | Africa    | -                   | -          | -           | G5045     | Synthetic | -           | -                           | 234458                    | -        | -        | 8.35       | 10.05      |
| Nigeria             | Africa    | -                   | -          | -           | G5048     | Synthetic | -           | -                           | 1735850                   | -        | -        | 8.25       | 6.65       |
| Nigeria             | Africa    | -                   | -          | -           | G5049     | Synthetic | -           | -                           | 15678                     | -        | -        | 8.25       | 6.75       |
| Nigeria             | Africa    | -                   | -          | -           | G5050     | Synthetic | -           | -                           | 20048                     | -        | -        | 8.25       | 10.05      |
| Nigeria             | Africa    | -                   | -          | -           | G5094     | Synthetic | -           | -                           | 22110                     | -        | -        | 6.65       | 3.35       |
| Nigeria             | Africa    | -                   | -          | -           | G5097     | Synthetic | -           | -                           | 25463                     | -        | -        | 6.55       | 3.55       |
| Nigeria             | Africa    | -                   | -          | -           | G5105     | Synthetic | -           | -                           | 15388                     | -        | -        | 6.25       | 8.45       |
| Nigeria             | Africa    | -                   | -          | -           | G5112     | Synthetic | -           | -                           | 20225                     | -        | -        | 6.05       | 8.45       |
| Republic of Liberia | Africa    | Cestos River at Iti | Cestos     | -           | G4931     | LHS       | -           | 11584                       | 20770                     | -5.617   | 9.319    | 5.65       | -9.25      |

| Country             | Continent | Station Name            | River Name | River Basin   | GloFAS ID | Provider  | Provider ID | Catchment Area Provided km² | Catchment Area GloFAS km² | LAT Prov | LON Prov | LAT GloFAS | LON GloFAS |
|---------------------|-----------|-------------------------|------------|---------------|-----------|-----------|-------------|-----------------------------|---------------------------|----------|----------|------------|------------|
| Republic of Liberia | Africa    | Lofa Bridge (03LO001)=  | Lofa       | -             | G4947     | LHS       | -           | 8194                        | 8107                      | 7.067    | -10.88   | 7.15       | -10.75     |
| Republic of Liberia | Africa    | Kaiha at Kolba          | Kaiha      | -             | G4948     | LHS       | -           | 673                         | 613                       | -8.278   | 10.078   | 8.35       | -10.05     |
| Republic of Liberia | Africa    | St.Paul River at Haindi | Saint Paul | -             | G4952     | LHS       | -           | 18276                       | 16122                     | 6.9021   | 10.361   | 6.05       | -9.95      |
| Republic of Liberia | Africa    | St.John River at Mount  | Saint John | -             | G5087     | LHS       | -           | 15723                       | 17325                     | 6.084    | -9.87    | 7.05       | -10.15     |
| Republic of Liberia | Africa    | St.John River at Frank  | Saint John | -             | G5108     | LHS       | -           | 10862                       | 10704                     | 6.466    | -9.526   | 6.55       | -9.45      |
| Republic of Liberia | Africa    | Mano Kongo (01MA003)=   | Mano       | -             | G5111     | LHS       | -           | 5514                        | 5405                      | 7.328    | -        | 7.35       | -11.05     |
| Rwanda              | Africa    | -                       | -          | -             | G5342     | Synthetic | -           | -                           | 18260                     | -        | -        | -2.35      | 30.65      |
| Senegal             | Africa    | Kidira                  | Faleme     | Senegal       | G0996     | GRDC      | 1812600     | 28900                       | 29025                     | 14.45    | -12.22   | 14.35      | -12.25     |
| Senegal             | Africa    | Gouloumbou              | Gambia     | Gambia        | G1008     | GRDC      | 1813200     | 42000                       | 42346                     | 13.47    | -13.73   | 13.45      | -13.75     |
| Senegal             | Africa    | Wassadou Amont          | Gambia     | Gambia        | G1012     | GRDC      | 1813460     | 21200                       | 20965                     | 13.35    | -13.37   | 13.25      | -13.35     |
| Senegal             | Africa    | Wassadou Aval           | Gambia     | Gambia        | G1013     | GRDC      | 1813450     | 33500                       | 33507                     | 13.35    | -13.38   | 13.25      | -13.55     |
| Senegal             | Africa    | Simenti                 | Gambia     | Gambia        | G1018     | GRDC      | 1813500     | 20500                       | 20361                     | 13.03    | -13.3    | 13.05      | -13.35     |
| Senegal             | Africa    | Mako                    | Gambia     | Gambia        | G1022     | GRDC      | 1813700     | 10450                       | 10558                     | 12.87    | -12.35   | 12.75      | -12.45     |
| Senegal             | Africa    | -                       | -          | -             | G4849     | Synthetic | -           | -                           | 396482                    | -        | -        | 16.45      | -15.65     |
| Senegal             | Africa    | -                       | -          | -             | G4856     | Synthetic | -           | -                           | 45385                     | -        | -        | 16.35      | -15.75     |
| Senegal             | Africa    | -                       | -          | -             | G4863     | Synthetic | -           | -                           | 348261                    | -        | -        | 16.05      | -13.55     |
| Somalia             | Africa    | Luuq                    | Juba       | Juba Shabelle | G1604     | National  | -           | 168925                      | 171144                    | 3.75     | 42.55    | 3.85       | 42.55      |
| Somalia             | Africa    | Bardheere               | Juba       | Juba Shabelle | G1605     | National  | -           | 200822                      | 200320                    | 2.35     | 42.25    | 2.35       | 42.25      |
| Somalia             | Africa    | Beletweyne              | Shabelle   | Juba Shabelle | G1606     | National  | -           | 197537                      | 196780                    | 4.75     | 45.25    | 4.65       | 45.25      |
| Somalia             | Africa    | Bulo Burti              | Shabelle   | Juba Shabelle | G1607     | National  | -           | 210015                      | 210122                    | 3.85     | 45.55    | 3.85       | 45.55      |
| Somalia             | Africa    | -                       | Shabelle   | Juba Shabelle | G1903     | DFO       | 1521        | -                           | 217911                    | 2.564    | 45.495   | 2.55       | 45.45      |
| Somalia             | Africa    | Jowhar                  | Shabelle   | Juba Shabelle | G1908     | DFO       | 1529        | -                           | 212965                    | 2.834    | 45.405   | 2.85       | 45.55      |
| Somalia             | Africa    | -                       | -          | -             | G5084     | Synthetic | -           | -                           | 39107                     | -        | -        | 7.25       | 47.25      |
| Somalia             | Africa    | -                       | -          | -             | G5099     | Synthetic | -           | -                           | 19185                     | -        | -        | 6.45       | 48.75      |
| Somalia             | Africa    | -                       | -          | -             | G5101     | Synthetic | -           | -                           | 55450                     | -        | -        | 6.35       | 47.25      |
| Somalia             | Africa    | -                       | -          | -             | G5102     | Synthetic | -           | -                           | 145909                    | -        | -        | 6.35       | 48.65      |
| Somalia             | Africa    | -                       | -          | -             | G5107     | Synthetic | -           | -                           | 18323                     | -        | -        | 6.25       | 47.15      |
| Somalia             | Africa    | -                       | -          | -             | G5116     | Synthetic | -           | -                           | 77963                     | -        | -        | 5.75       | 48.25      |
| Somalia             | Africa    | -                       | -          | -             | G5119     | Synthetic | -           | -                           | 54523                     | -        | -        | 5.65       | 48.25      |
| Somalia             | Africa    | -                       | -          | -             | G5152     | Synthetic | -           | -                           | 61493                     | -        | -        | 4.05       | 41.95      |
| Somalia             | Africa    | -                       | -          | -             | G5190     | Synthetic | -           | -                           | 33253                     | -        | -        | 1.75       | 41.55      |
| Somalia             | Africa    | -                       | -          | -             | G5191     | Synthetic | -           | -                           | 14592                     | -        | -        | 1.75       | 41.65      |
| Somalia             | Africa    | -                       | -          | -             | G5201     | Synthetic | -           | -                           | 43771                     | -        | -        | 1.35       | 43.75      |
| Somalia             | Africa    | -                       | -          | -             | G5202     | Synthetic | -           | -                           | 231515                    | -        | -        | 1.35       | 43.85      |
| Somalia             | Africa    | -                       | -          | -             | G5212     | Synthetic | -           | -                           | 26592                     | -        | -        | -0.85      | 41.35      |
| Somalia             | Africa    | -                       | -          | -             | G5213     | Synthetic | -           | -                           | 50196                     | -        | -        | -0.85      | 41.85      |
| Somalia             | Africa    | -                       | -          | -             | G5218     | Synthetic | -           | -                           | 65919                     | -        | -        | -0.75      | 41.75      |
| Somalia             | Africa    | -                       | -          | -             | G5221     | Synthetic | -           | -                           | 28443                     | -        | -        | -0.65      | 41.35      |
| Somalia             | Africa    | -                       | -          | -             | G5222     | Synthetic | -           | -                           | 123165                    | -        | -        | -0.65      | 42.05      |

| Country      | Continent | Station Name           | River Name              | River Basin   | GloFAS ID | Provider  | Provider ID | Catchment Area Provided km² | Catchment Area GloFAS km² | LAT Prov | LON Prov | LAT GloFAS | LON GloFAS |
|--------------|-----------|------------------------|-------------------------|---------------|-----------|-----------|-------------|-----------------------------|---------------------------|----------|----------|------------|------------|
| Somalia      | Africa    | -                      | -                       | -             | G5224     | Synthetic | -           | -                           | 93131                     | -        | -        | -0.55      | 41.95      |
| Somalia      | Africa    | -                      | -                       | -             | G5228     | Synthetic | -           | -                           | 215905                    | -        | -        | -0.35      | 42.75      |
| Somalia      | Africa    | -                      | -                       | -             | G5229     | Synthetic | -           | -                           | 299406                    | -        | -        | -0.35      | 42.85      |
| Somalia      | Africa    | -                      | -                       | -             | G5239     | Synthetic | -           | -                           | 231259                    | -        | -        | -0.05      | 42.55      |
| Somalia      | Africa    | Jamaame                | Juba                    | Juba Shabelle | G5244     | SWALIM    | -           | -                           | 517042                    | -        | 42.680   | -0.05      | 42.65      |
| Somalia      | Africa    | Jilib                  | Juba                    | Juba Shabelle | G6083     | SWALIM    | -           | -                           | 215658                    | -        | 42.764   | -0.55      | 42.75      |
| Somalia      | Africa    | Kaytooy                | Juba                    | Juba Shabelle | G6084     | SWALIM    | -           | -                           | 215163                    | -        | 42.669   | -0.75      | 42.65      |
| Somalia      | Africa    | Kamsuma                | Juba                    | Juba Shabelle | G6085     | SWALIM    | -           | -                           | 516424                    | -        | 42.772   | -0.25      | 42.75      |
| Somalia      | Africa    | Marerey                | Juba                    | Juba Shabelle | G6086     | SWALIM    | -           | -                           | 215781                    | -        | 42.720   | -0.45      | 42.75      |
| Somalia      | Africa    | Bu Ale                 | Juba                    | Juba Shabelle | G6087     | SWALIM    | -           | -                           | 213555                    | 1.2447   | 42.573   | 1.25       | 42.55      |
| Somalia      | Africa    | Afgooye                | Shabelle                | Juba Shabelle | G6088     | SWALIM    | -           | -                           | 219148                    | 2.1479   | 45.123   | 2.15       | 45.15      |
| Somalia      | Africa    | Audegle                | Shabelle                | Juba Shabelle | G6089     | SWALIM    | -           | -                           | 220261                    | 1.9818   | 44.832   | 1.95       | 44.85      |
| Somalia      | Africa    | Balcad                 | Shabelle                | Juba Shabelle | G6090     | SWALIM    | -           | -                           | 218530                    | 2.3497   | 45.390   | 2.35       | 45.35      |
| South Africa | Africa    | Beitbrug U S           | Limpopo                 | Limpopo       | G1417     | GRDC      | 1196550     | 201000                      | 195376                    | -        | 29.986   | -22.25     | 30.05      |
| South Africa | Africa    | Beibrug D S            | Limpopo                 | Limpopo       | G1418     | GRDC      | 1196551     | 201001                      | 195376                    | -        | 29.990   | -22.25     | 30.05      |
| South Africa | Africa    | Botswana Oxenham       | Limpopo                 | Limpopo       | G1420     | GRDC      | 1196400     | 98160                       | 97645                     | -        | 27.973   | -22.75     | 28.15      |
| South Africa | Africa    | Finale 27521009        | Elefantes -             | Limpopo       | G1429     | GRDC      | 1196100     | 42714                       | 43157                     | -        | 30.741   | -24.25     | 30.85      |
| South Africa | Africa    | Loskop Noord 27527001  | Elefantes -             | Limpopo       | G1433     | GRDC      | 1196102     | 16622                       | 15430                     | -        | 29.389   | -24.95     | 29.35      |
| South Africa | Africa    | Tenbosch 27613216      | Crocodile -             | Incomati      | G1436     | GRDC      | 1197500     | 10379                       | 9979                      | -        | 31.955   | -25.35     | 31.95      |
| South Africa | Africa    | Elandsfontein          | Vaal                    | Orange        | G1445     | GRDC      | 1159800     | 38564                       | 36607                     | -26.82   | 28.063   | -26.75     | 27.95      |
| South Africa | Africa    | Slabberts 27817822     | Wilge                   | Orange        | G1447     | GRDC      | 1159810     | 15522                       | 15597                     | -        | 28.495   | -27.25     | 28.45      |
| South Africa | Africa    | Taung 27817303         | Harts                   | Orange        | G1450     | GRDC      | 1159400     | 11044                       | 10543                     | -        | 24.745   | -27.55     | 24.75      |
| South Africa | Africa    | Uppington              | Orange                  | Orange        | G1454     | GRDC      | 1159300     | 364560                      | 313982                    | -        | 21.239   | -28.75     | 20.85      |
| South Africa | Africa    | De Hoop 65             | Vaal                    | Orange        | G1455     | GRDC      | 1159500     | 120982                      | 110883                    | -        | 24.603   | -28.55     | 24.55      |
| South Africa | Africa    | Vioolsdrif 27811003    | Orange                  | Orange        | G1457     | GRDC      | 1159100     | 866486                      | 734698                    | -        | 17.721   | -28.75     | 17.65      |
| South Africa | Africa    | Mandini 27661102       | Tugela                  | Tugela        | G1459     | GRDC      | 1160880     | 28920                       | 27578                     | -        | 31.392   | -29.25     | 31.45      |
| South Africa | Africa    | Marksdrift 27815208    | Orange                  | Orange        | G1460     | GRDC      | 1159302     | 99316                       | 89613                     | -        | 23.695   | -29.15     | 23.65      |
| South Africa | Africa    | Prieska 27815102       | Orange                  | Orange        | G1465     | GRDC      | 1159301     | 339310                      | 290367                    | -        | 22.745   | -29.65     | 22.75      |
| South Africa | Africa    | Vluytjeskraal 27815205 | Orange                  | Orange        | G1466     | GRDC      | 1159303     | 92346                       | 88610                     | -        | 24.437   | -29.35     | 23.85      |
| South Africa | Africa    | Oranjedraai 27819109   | Orange                  | Orange        | G1471     | GRDC      | 1159651     | 24745                       | 24542                     | -        | 27.358   | -30.55     | 27.15      |
| South Africa | Africa    | Hol Pads Leegte        | Sak                     | Orange        | G1473     | GRDC      | 1159130     | 40073                       | 39235                     | -        | 20.519   | -29.75     | 21.05      |
| South Africa | Africa    | Aliwal Noord 27819103  | Orange                  | Orange        | G1475     | GRDC      | 1159650     | 37070                       | 35209                     | -        | 26.716   | -30.65     | 26.55      |
| South Africa | Africa    | Windhoek 27814013      | Sak                     | Orange        | G1476     | GRDC      | 1159131     | 13116                       | 12788                     | -        | 21.322   | -31.35     | 21.25      |
| South Africa | Africa    | Brandt Legte Piggot S  | Great Fish - Groot Vis  | Groot Vis     | G1488     | GRDC      | 1160510     | 23067                       | 21869                     | -        | 26.444   | -33.15     | 26.55      |
| South Africa | Africa    | Matolema S Location    | Great Fish - Groot Vis  | Groot Vis     | G1490     | GRDC      | 1160580     | 29745                       | 28205                     | -        | 26.994   | -33.45     | 27.05      |
| South Africa | Africa    | Grootrivierspoort      | Grootrivier (Za Eastern | -             | G1493     | GRDC      | 1160460     | 29571                       | 31189                     | -        | 24.617   | -33.75     | 24.65      |
| South Africa | Africa    | Orange Rivier At       | Orange                  | Orange        | G1608     | DWA       | -           | 851580                      | 735613                    | -        | 17.626   | -28.75     | 17.55      |
| South Africa | Africa    | Orange River At        | Orange                  | Orange        | G1609     | DWA       | -           | 833200                      | 729008                    | -        | 18.237   | -28.95     | 18.15      |
| South Africa | Africa    | Orange River At Pella  | Orange                  | Orange        | G1610     | DWA       | -           | 821850                      | 715309                    | -        | 19.151   | -28.95     | 19.05      |

| Country      | Continent | Station Name               | River Name | River Basin | GloFAS ID | Provider | Provider ID | Catchment Area Provided km² | Catchment Area GloFAS km² | LAT Prov | LON Prov | LAT GloFAS | LON GloFAS |
|--------------|-----------|----------------------------|------------|-------------|-----------|----------|-------------|-----------------------------|---------------------------|----------|----------|------------|------------|
| South Africa | Africa    | Orange River At            | Orange     | Orange      | G1611     | DWA      | -           | 818300                      | 711579                    | -        | 19.305   | -28.85     | 19.25      |
| South Africa | Africa    | Orange River At Kakamas    | Orange     | Orange      | G1612     | DWA      | -           | 462870                      | 390212                    | -        | 20.428   | -28.55     | 20.25      |
| South Africa | Africa    | Orange River At Kakamas    | Orange     | Orange      | G1613     | DWA      | -           | 368830                      | 388186                    | -        | 20.622   | -28.75     | 20.55      |
| South Africa | Africa    | Orange River At Kakamas    | Orange     | Orange      | G1614     | DWA      | -           | 368549                      | 314995                    | -        | 20.722   | -28.75     | 20.65      |
| South Africa | Africa    | Orange River At Kanon      | Orange     | Orange      | G1615     | DWA      | -           | 365355                      | 388186                    | -        | 21.092   | -28.75     | 20.55      |
| South Africa | Africa    | Orange River At Kanon      | Orange     | Orange      | G1616     | DWA      | -           | 365355                      | 388186                    | -        | 21.092   | -28.75     | 20.55      |
| South Africa | Africa    | Orange River At            | Orange     | Orange      | G1617     | DWA      | -           | 342967                      | 302699                    | -        | 22.187   | -28.95     | 22.15      |
| South Africa | Africa    | Orange River At            | Orange     | Orange      | G1618     | DWA      | -           | 340157                      | 294078                    | -        | 22.317   | -29.25     | 22.25      |
| South Africa | Africa    | Orange River At Irene      | Orange     | Orange      | G1619     | DWA      | -           | 295272                      | 289668                    | -        | 23.575   | -29.65     | 22.85      |
| South Africa | Africa    | Vaal River At Schmidtsdrif | Vaal       | Orange      | G1620     | DWA      | -           | 157508                      | 145629                    | -        | 24.072   | -28.95     | 23.95      |
| South Africa | Africa    | Vaal River At Gamagara     | Vaal       | Orange      | G1621     | DWA      | -           | 153093                      | 145528                    | -        | 24.271   | -28.85     | 23.95      |
| South Africa | Africa    | Vaal River At De Hoop 65   | Vaal       | Orange      | G1622     | DWA      | -           | 121052                      | 110883                    | -        | 24.600   | -28.55     | 24.55      |
| South Africa | Africa    | Vaal River At Riverton     | Vaal       | Orange      | G1623     | DWA      | -           | 120902                      | 110883                    | -        | 24.697   | -28.55     | 24.55      |
| South Africa | Africa    | Vaal River At Schoolplaats | Vaal       | Orange      | G1624     | DWA      | -           | 115057                      | 110171                    | -        | 24.914   | -28.45     | 24.75      |
| South Africa | Africa    | Vaal River At Port         | Vaal       | Orange      | G1625     | DWA      | -           | 108652                      | 104243                    | -        | 25.617   | -27.75     | 25.35      |
| South Africa | Africa    | Limpopo River At           | Limpopo    | Limpopo     | G1626     | DWA      | -           | 98240                       | 97206                     | -        | 28.003   | -22.85     | 28.05      |
| South Africa | Africa    | Vaal River At              | Vaal       | Orange      | G1627     | DWA      | -           | 79903                       | 79269                     | -        | 26.463   | -27.55     | 26.15      |
| South Africa | Africa    | Orange River At            | Orange     | Orange      | G1628     | DWA      | -           | 70897                       | 69276                     | -        | 25.420   | -30.45     | 25.15      |
| South Africa | Africa    | Vaal River At Pilgrims     | Vaal       | Orange      | G1629     | DWA      | -           | 63437                       | 66689                     | -        | 26.698   | -27.05     | 26.65      |
| South Africa | Africa    | Olifants River At Kruger   | Elefant -  | Limpopo     | G1630     | DWA      | -           | 53820                       | 51785                     | -        | 31.720   | -24.05     | 31.85      |
| South Africa | Africa    | Olifants River At Kruger   | Elefant -  | Limpopo     | G1631     | DWA      | -           | 49826                       | 49631                     | -        | 31.242   | -24.05     | 31.45      |
| South Africa | Africa    | Vaal River At De Vaal      | Vaal       | Orange      | G1632     | DWA      | -           | 49120                       | 46957                     | -        | 27.209   | -26.95     | 27.05      |
| South Africa | Africa    | Vaal River At Woodlands    | Vaal       | Orange      | G1633     | DWA      | -           | 47222                       | 46957                     | -        | 27.591   | -26.95     | 27.05      |
| South Africa | Africa    | Vaal River At Woodlands    | Vaal       | Orange      | G1634     | DWA      | -           | 47214                       | 46541                     | -        | 27.608   | -26.95     | 27.25      |
| South Africa | Africa    | Olifants River At Oxford   | Elefant -  | Limpopo     | G1635     | DWA      | -           | 46583                       | 47260                     | -        | 30.822   | -24.05     | 31.15      |
| South Africa | Africa    | Gourits River At           | Gourits    | Gamka       | G1636     | DWA      | -           | 43451                       | 39864                     | -        | 21.653   | -33.95     | 21.65      |
| South Africa | Africa    | Vaal River At Annie S Rust | Vaal       | Orange      | G1637     | DWA      | -           | 38523                       | 36503                     | -        | 28.121   | -26.85     | 28.05      |
| South Africa | Africa    | -                          | -          | Orange      | G1638     | DWA      | -           | 34602                       | 17956                     | -        | 23.982   | -29.05     | 23.95      |
| South Africa | Africa    | Riet River At Estate       | Riet       | Orange      | G1639     | DWA      | -           | 33351                       | 17048                     | -        | 24.242   | -28.95     | 24.25      |
| South Africa | Africa    | Riet River At Klipdrift    | Riet       | Orange      | G1640     | DWA      | -           | 31233                       | 14923                     | -        | 24.599   | -29.05     | 24.55      |
| South Africa | Africa    | Harts River At Lloyds      | Harts      | Orange      | G1641     | DWA      | -           | 29370                       | 28635                     | -        | 24.297   | -28.35     | 24.35      |
| South Africa | Africa    | Faure Crocodile River      | Faure      | Limpopo     | G1642     | DWA      | -           | -                           | 27759                     | -        | 27.089   | -24.25     | 26.95      |
| South Africa | Africa    | Groot River At Sandpoort   | Groot      | -           | G1643     | DWA      | -           | 28451                       | 26631                     | -        | 24.689   | -33.45     | 24.65      |
| South Africa | Africa    | Harts River At Spitskop    | Harts      | Orange      | G1644     | DWA      | -           | 28145                       | 26692                     | -        | 24.470   | -28.25     | 24.45      |
| South Africa | Africa    | Olifants River At          | Elefant -  | Limpopo     | G1645     | DWA      | -           | -                           | 23970                     | -        | 29.421   | -24.65     | 29.45      |
| South Africa | Africa    | Harts River At Espagsdrif  | Harts      | Orange      | G1646     | DWA      | -           | 24097                       | 24947                     | -        | 24.615   | -28.05     | 24.55      |
| South Africa | Africa    | Doring River At            | Doring     | Doring      | G1647     | DWA      | -           | 24044                       | 24905                     | -        | 18.686   | -31.85     | 18.65      |
| South Africa | Africa    | Krokodil River At          | Krokodil   | Limpopo     | G1648     | DWA      | -           | 22270                       | 22618                     | -        | 27.409   | -24.65     | 27.45      |
| South Africa | Africa    | Krokodil River At          | Krokodil   | Limpopo     | G1649     | DWA      | -           | 22270                       | 22618                     | -        | 27.409   | -24.65     | 27.45      |



| Country      | Continent | Station Name             | River Name             | River Basin | GloFAS ID | Provider  | Provider ID | Catchment Area Provided km² | Catchment Area GloFAS km² | LAT Prov | LON Prov | LAT GloFAS | LON GloFAS |
|--------------|-----------|--------------------------|------------------------|-------------|-----------|-----------|-------------|-----------------------------|---------------------------|----------|----------|------------|------------|
| South Africa | Africa    | Komati River At          | Komati                 | Incomati    | G1650     | DWA       | -           | 21652                       | 21380                     | -        | 31.982   | -25.45     | 32.25      |
| South Africa | Africa    | Krokodil River At        | Krokodil               | Limpopo     | G1651     | DWA       | -           | 21349                       | 21010                     | -        | 27.548   | -24.75     | 27.45      |
| South Africa | Africa    | Krokodil River At        | Krokodil               | Limpopo     | G1652     | DWA       | -           | 20627                       | 20261                     | -        | 27.52    | -24.95     | 27.55      |
| South Africa | Africa    | Harts River At Tlapeng   | Harts                  | Orange      | G1653     | DWA       | -           | 19733                       | 20937                     | -        | 24.930   | -27.65     | 24.65      |
| South Africa | Africa    | Mzimvubu River At        | Mzimvubu               | -           | G1654     | DWA       | -           | 19273                       | 18060                     | -        | 29.265   | -31.55     | 29.45      |
| South Africa | Africa    | Great Fish River At Sout | Great Fish - Groot Vis | Groot Vis   | G1655     | DWA       | -           | 19134                       | 20457                     | -        | 25.893   | -33.05     | 25.95      |
| South Africa | Africa    | Vaal River At Villiers   | Vaal                   | Orange      | G1656     | DWA       | -           | 18616                       | 18307                     | -        | 28.593   | -26.95     | 28.45      |
| South Africa | Africa    | Modder River At Twee     | Modder                 | Orange      | G1657     | DWA       | -           | 17315                       | 14721                     | -        | 24.640   | -29.05     | 24.65      |
| South Africa | Africa    | Modder River At          | Modder                 | Orange      | G1658     | DWA       | -           | 17313                       | 14721                     | -        | 24.638   | -29.05     | 24.65      |
| South Africa | Africa    | Sak River At Williston   | Sak                    | Orange      | G1659     | DWA       | -           | 16835                       | 16968                     | -        | 20.892   | -31.15     | 20.65      |
| South Africa | Africa    | Vet River At Fisantkraal | Vet                    | Orange      | G1660     | DWA       | -           | 16153                       | 16202                     | -        | 2.6124   | -27.85     | 25.95      |
| South Africa | Africa    | Mogalakwena River At     | Mogalakwena            | Limpopo     | G1661     | DWA       | -           | 15845                       | 15288                     | -        | 28.897   | -22.55     | 28.85      |
| South Africa | Africa    | Wilge River At Frankfort | Wilge                  | Orange      | G1662     | DWA       | -           | 15673                       | 15701                     | -        | 28.491   | -27.15     | 28.35      |
| South Africa | Africa    | Vaal River At            | Vaal                   | Orange      | G1663     | DWA       | -           | 15500                       | 15073                     | -        | 28.765   | -27.05     | 28.75      |
| South Africa | Africa    | Wilge River At Slabberts | Wilge                  | Orange      | G1664     | DWA       | -           | 15466                       | 14459                     | -        | 28.488   | -27.35     | 28.55      |
| South Africa | Africa    | Caledon River At         | Caledon                | Orange      | G1665     | DWA       | -           | -                           | 15495                     | -        | 26.858   | -30.05     | 26.85      |
| South Africa | Africa    | Mogalakwena River At     | Mogalakwena            | Limpopo     | G1666     | DWA       | -           | 14733                       | 14412                     | -        | 28.886   | -22.65     | 28.85      |
| South Africa | Africa    | Sondags River At De      | Sondags                | -           | G1667     | DWA       | -           | 13422                       | 12576                     | -        | 25.011   | -33.15     | 25.05      |
| South Africa | Africa    | Letaba River At Kruger   | Letaba                 | Limpopo     | G1668     | DWA       | -           | 12938                       | 13141                     | -        | 31.637   | -23.85     | 31.65      |
| South Africa | Africa    | Tugela River At Tugela   | Tugela                 | Tugela      | G1669     | DWA       | -           | 12862                       | 12277                     | -28.75   | 30.442   | -28.75     | 30.45      |
| South Africa | Africa    | Caledon River At         | Caledon                | Orange      | G1670     | DWA       | -           | 12852                       | 12307                     | -        | 27.065   | -29.65     | 27.05      |
| South Africa | Africa    | Tugela River At Impafana | Tugela                 | Tugela      | G1671     | DWA       | -           | 12498                       | 12176                     | -        | 30.378   | -28.75     | 30.35      |
| South Africa | Africa    | Groot River At           | Groot                  | Gamka       | G1672     | DWA       | -           | 12493                       | 11797                     | -        | 21.444   | -33.75     | 21.55      |
| South Africa | Africa    | Olifants River At Loskop | Elefantes -            | Limpopo     | G1673     | DWA       | -           | 12286                       | 12344                     | -        | 29.358   | -25.35     | 29.35      |
| South Africa | Africa    | Sondags River At         | Sondags                | -           | G1674     | DWA       | -           | 11395                       | 10501                     | -        | 24.666   | -32.95     | 24.65      |
| South Africa | Africa    | Mogalakwena River At     | Mogalakwena            | Limpopo     | G1675     | DWA       | -           | 11292                       | 11023                     | -        | 28.699   | -23.25     | 28.65      |
| South Africa | Africa    | Komati River At M Weti   | Komati                 | Incomati    | G1676     | DWA       | -           | 11182                       | 10234                     | -        | 31.951   | -25.55     | 31.95      |
| South Africa | Africa    | Olifants River At Warm   | Olifants               | Gamka       | G1677     | DWA       | -           | 10927                       | 10096                     | -33.66   | 21.773   | -33.65     | 21.75      |
| South Africa | Africa    | Great Fish River At      | Great Fish - Groot Vis | Groot Vis   | G1678     | DWA       | -           | 10830                       | 10146                     | -        | 25.575   | -32.05     | 25.55      |
| South Africa | Africa    | Orange River At Lesotho  | Orange                 | Orange      | G1679     | DWA       | -           | 10680                       | 10335                     | -        | 28.505   | -30.05     | 28.35      |
| South Africa | Africa    | Great Letaba River At    | Great                  | Limpopo     | G1680     | DWA       | -           | 10652                       | 10970                     | -        | 31.214   | -23.75     | 31.35      |
| South Africa | Africa    | Riet River At Philippia  | Riet                   | Orange      | G1681     | DWA       | -           | 10568                       | 10584                     | -        | 25.208   | -29.35     | 24.95      |
| South Africa | Africa    | Orange River At Lesotho  | Orange                 | Orange      | G1682     | DWA       | -           | 10497                       | 10037                     | -        | 28.509   | -30.05     | 28.45      |
| South Africa | Africa    | Wilge River At           | Wilge                  | Orange      | G1683     | DWA       | -           | 10489                       | 9634                      | -        | 28.585   | -27.45     | 28.65      |
| South Africa | Africa    | -                        | -                      | -           | G5862     | Synthetic | -           | -                           | 12865                     | -        | -        | -22.45     | 30.05      |
| South Africa | Africa    | -                        | -                      | -           | G5899     | Synthetic | -           | -                           | 41428                     | -        | -        | -23.85     | 26.95      |
| South Africa | Africa    | -                        | -                      | -           | G5923     | Synthetic | -           | -                           | 23627                     | -        | -        | -25.35     | 23.15      |
| South Africa | Africa    | -                        | -                      | -           | G5937     | Synthetic | -           | -                           | 54270                     | -        | -        | -25.95     | 20.75      |
| South Africa | Africa    | -                        | -                      | -           | G5940     | Synthetic | -           | -                           | 44764                     | -        | -        | -26.05     | 20.45      |



| Country      | Continent | Station Name | River Name | River Basin | GloFAS ID | Provider  | Provider ID | Catchment Area Provided km² | Catchment Area GloFAS km² | LAT Prov | LON Prov | LAT GloFAS | LON GloFAS |
|--------------|-----------|--------------|------------|-------------|-----------|-----------|-------------|-----------------------------|---------------------------|----------|----------|------------|------------|
| South Africa | Africa    | -            | -          | -           | G5942     | Synthetic | -           | -                           | 56106                     | -        | -        | -26.35     | 20.55      |
| South Africa | Africa    | -            | -          | -           | G5954     | Synthetic | -           | -                           | 154864                    | -        | -        | -26.85     | 20.65      |
| South Africa | Africa    | -            | -          | -           | G5956     | Synthetic | -           | -                           | 15871                     | -        | -        | -26.85     | 32.25      |
| South Africa | Africa    | -            | -          | -           | G5959     | Synthetic | -           | -                           | 33400                     | -        | -        | -26.95     | 20.75      |
| South Africa | Africa    | -            | -          | -           | G5960     | Synthetic | -           | -                           | 19140                     | -        | -        | -26.95     | 28.25      |
| South Africa | Africa    | -            | -          | -           | G5971     | Synthetic | -           | -                           | 83202                     | -        | -        | -27.65     | 25.75      |
| South Africa | Africa    | -            | -          | -           | G5974     | Synthetic | -           | -                           | 17638                     | -        | -        | -27.75     | 25.65      |
| South Africa | Africa    | -            | -          | -           | G5980     | Synthetic | -           | -                           | 743185                    | -        | -        | -28.25     | 17.25      |
| South Africa | Africa    | -            | -          | -           | G6037     | Synthetic | -           | -                           | 15462                     | -        | -        | -31.55     | 18.45      |
| Sudan        | Africa    | Eddiem       | Blue Nile  | Nile        | G1684     | -         | -           | -                           | 176160                    | 11.23    | 34.98    | 11.25      | 34.95      |
| Sudan        | Africa    | Ros Old      | Blue Nile  | Nile        | G1685     | -         | -           | -                           | 190039                    | 11.85    | 34.38    | 11.85      | 34.35      |
| Sudan        | Africa    | Sennar U S   | Blue Nile  | Nile        | G1686     | -         | -           | -                           | 203978                    | 13.55    | 33.63    | 13.55      | 33.65      |
| Sudan        | Africa    | Khartoum     | Blue Nile  | Nile        | G1687     | -         | -           | -                           | 309828                    | 15.6     | 32.51    | 15.65      | 32.55      |
| Sudan        | Africa    | Dongola      | Nile       | Nile        | G1688     | -         | -           | -                           | 2586140                   | 19.16    | 30.53    | 19.15      | 30.45      |
| Sudan        | Africa    | Malakal      | Nile       | Nile        | G1689     | -         | -           | -                           | 1417660                   | 9.55     | 31.66    | 9.55       | 31.65      |
| Sudan        | Africa    | -            | Nile       | Nile        | G1909     | DFO       | 1541        | -                           | 1547210                   | 12.374   | 32.805   | 12.35      | 32.75      |
| Sudan        | Africa    | -            | Nile       | Nile        | G1910     | DFO       | 1542        | -                           | 1575890                   | 13.814   | 32.445   | 13.75      | 32.45      |
| Sudan        | Africa    | -            | Nile       | Nile        | G1911     | DFO       | 1543        | -                           | 1662940                   | 14.804   | 32.265   | 14.75      | 32.25      |
| Sudan        | Africa    | -            | Blue Nile  | Nile        | G1912     | DFO       | 1544        | -                           | 200349                    | 13.094   | 33.975   | 13.25      | 33.95      |
| Sudan        | Africa    | -            | Blue Nile  | Nile        | G1913     | DFO       | 1545        | -                           | 206392                    | 13.724   | 33.615   | 13.75      | 33.55      |
| Sudan        | Africa    | -            | Nile       | Nile        | G1914     | DFO       | 1547        | -                           | 1676510                   | 15.524   | 32.445   | 15.55      | 32.45      |
| Sudan        | Africa    | -            | Nile       | Nile        | G1915     | DFO       | 1548        | -                           | 1995400                   | 16.514   | 32.895   | 16.45      | 32.85      |
| Sudan        | Africa    | -            | -          | -           | G4648     | Synthetic | -           | -                           | 13857                     | -        | -        | 21.95      | 27.95      |
| Sudan        | Africa    | -            | -          | -           | G4653     | Synthetic | -           | -                           | 18675                     | -        | -        | 21.85      | 28.05      |
| Sudan        | Africa    | -            | -          | -           | G4706     | Synthetic | -           | -                           | 17490                     | -        | -        | 20.25      | 30.65      |
| Sudan        | Africa    | -            | -          | -           | G4710     | Synthetic | -           | -                           | 2606140                   | -        | -        | 20.15      | 30.55      |
| Sudan        | Africa    | -            | -          | -           | G4748     | Synthetic | -           | -                           | 2282260                   | -        | -        | 18.85      | 33.55      |
| Sudan        | Africa    | -            | -          | -           | G4749     | Synthetic | -           | -                           | 32468                     | -        | -        | 18.85      | 33.65      |
| Sudan        | Africa    | -            | -          | -           | G4757     | Synthetic | -           | -                           | 18075                     | -        | -        | 18.75      | 25.25      |
| Sudan        | Africa    | -            | -          | -           | G4762     | Synthetic | -           | -                           | 15202                     | -        | -        | 18.65      | 25.45      |
| Sudan        | Africa    | -            | -          | -           | G4765     | Synthetic | -           | -                           | 52791                     | -        | -        | 18.55      | 25.35      |
| Sudan        | Africa    | -            | -          | -           | G4766     | Synthetic | -           | -                           | 18433                     | -        | -        | 18.45      | 25.35      |
| Sudan        | Africa    | -            | -          | -           | G4769     | Synthetic | -           | -                           | 33652                     | -        | -        | 18.35      | 25.55      |
| Sudan        | Africa    | -            | -          | -           | G4772     | Synthetic | -           | -                           | 15205                     | -        | -        | 18.25      | 25.65      |
| Sudan        | Africa    | -            | -          | -           | G4773     | Synthetic | -           | -                           | 61356                     | -        | -        | 18.25      | 30.65      |
| Sudan        | Africa    | -            | -          | -           | G4774     | Synthetic | -           | -                           | 2520430                   | -        | -        | 18.25      | 30.75      |
| Sudan        | Africa    | -            | -          | -           | G4781     | Synthetic | -           | -                           | 2367390                   | -        | -        | 18.15      | 31.55      |
| Sudan        | Africa    | -            | -          | -           | G4787     | Synthetic | -           | -                           | 2422910                   | -        | -        | 18.05      | 31.05      |
| Sudan        | Africa    | -            | -          | -           | G4788     | Synthetic | -           | -                           | 51029                     | -        | -        | 18.05      | 31.55      |

| Country | Continent | Station Name | River Name | River Basin | GloFAS ID | Provider  | Provider ID | Catchment Area Provided km² | Catchment Area GloFAS km² | LAT Prov | LON Prov | LAT GloFAS | LON GloFAS |
|---------|-----------|--------------|------------|-------------|-----------|-----------|-------------|-----------------------------|---------------------------|----------|----------|------------|------------|
| Sudan   | Africa    | -            | -          | -           | G4789     | Synthetic | -           | -                           | 15396                     | -        | -        | 18.05      | 31.65      |
| Sudan   | Africa    | -            | -          | -           | G4795     | Synthetic | -           | -                           | 94328                     | -        | -        | 17.95      | 30.95      |
| Sudan   | Africa    | -            | -          | -           | G4796     | Synthetic | -           | -                           | 35397                     | -        | -        | 17.95      | 31.65      |
| Sudan   | Africa    | -            | -          | -           | G4803     | Synthetic | -           | -                           | 206018                    | -        | -        | 17.65      | 34.05      |
| Sudan   | Africa    | -            | -          | -           | G4804     | Synthetic | -           | -                           | 15408                     | -        | -        | 17.65      | 37.35      |
| Sudan   | Africa    | -            | -          | -           | G4805     | Synthetic | -           | -                           | 44613                     | -        | -        | 17.65      | 37.45      |
| Sudan   | Africa    | -            | -          | -           | G4807     | Synthetic | -           | -                           | 2054320                   | -        | -        | 17.55      | 33.95      |
| Sudan   | Africa    | -            | -          | -           | G4812     | Synthetic | -           | -                           | 25369                     | -        | -        | 17.45      | 29.05      |
| Sudan   | Africa    | -            | -          | -           | G4813     | Synthetic | -           | -                           | 13917                     | -        | -        | 17.45      | 34.55      |
| Sudan   | Africa    | -            | -          | -           | G4818     | Synthetic | -           | -                           | 19646                     | -        | -        | 17.35      | 29.15      |
| Sudan   | Africa    | -            | -          | -           | G4819     | Synthetic | -           | -                           | 2019320                   | -        | -        | 17.35      | 33.75      |
| Sudan   | Africa    | -            | -          | -           | G4820     | Synthetic | -           | -                           | 32507                     | -        | -        | 17.35      | 33.95      |
| Sudan   | Africa    | -            | -          | -           | G4821     | Synthetic | -           | -                           | 74199                     | -        | -        | 17.35      | 34.45      |
| Sudan   | Africa    | -            | -          | -           | G4822     | Synthetic | -           | -                           | 60164                     | -        | -        | 17.35      | 34.55      |
| Sudan   | Africa    | -            | -          | -           | G4823     | Synthetic | -           | -                           | 16667                     | -        | -        | 17.25      | 26.05      |
| Sudan   | Africa    | -            | -          | -           | G4824     | Synthetic | -           | -                           | 88150                     | -        | -        | 17.25      | 26.65      |
| Sudan   | Africa    | -            | -          | -           | G4825     | Synthetic | -           | -                           | 35521                     | -        | -        | 17.25      | 26.75      |
| Sudan   | Africa    | -            | -          | -           | G4826     | Synthetic | -           | -                           | 118562                    | -        | -        | 17.25      | 34.45      |
| Sudan   | Africa    | -            | -          | -           | G4828     | Synthetic | -           | -                           | 57784                     | -        | -        | 17.15      | 26.05      |
| Sudan   | Africa    | -            | -          | -           | G4854     | Synthetic | -           | -                           | 44822                     | -        | -        | 16.45      | 29.35      |
| Sudan   | Africa    | -            | -          | -           | G4858     | Synthetic | -           | -                           | 26923                     | -        | -        | 16.35      | 29.45      |
| Sudan   | Africa    | -            | -          | -           | G4878     | Synthetic | -           | -                           | 12350                     | -        | -        | 15.05      | 33.25      |
| Sudan   | Africa    | -            | -          | -           | G4879     | Synthetic | -           | -                           | 288983                    | -        | -        | 14.95      | 33.25      |
| Sudan   | Africa    | -            | -          | -           | G4888     | Synthetic | -           | -                           | 35516                     | -        | -        | 14.45      | 32.05      |
| Sudan   | Africa    | -            | -          | -           | G4889     | Synthetic | -           | -                           | 41397                     | -        | -        | 14.45      | 33.65      |
| Sudan   | Africa    | -            | -          | -           | G4892     | Synthetic | -           | -                           | 244823                    | -        | -        | 14.35      | 33.55      |
| Sudan   | Africa    | -            | -          | -           | G4894     | Synthetic | -           | -                           | 30442                     | -        | -        | 14.25      | 35.85      |
| Sudan   | Africa    | -            | -          | -           | G4895     | Synthetic | -           | -                           | 67651                     | -        | -        | 14.25      | 35.95      |
| Sudan   | Africa    | -            | -          | -           | G4899     | Synthetic | -           | -                           | 36504                     | -        | -        | 13.95      | 33.75      |
| Sudan   | Africa    | -            | -          | -           | G4942     | Synthetic | -           | -                           | 41332                     | -        | -        | 12.05      | 27.05      |
| Sudan   | Africa    | -            | -          | -           | G4944     | Synthetic | -           | -                           | 13042                     | -        | -        | 11.95      | 26.95      |
| Sudan   | Africa    | -            | -          | -           | G4949     | Synthetic | -           | -                           | 18886                     | -        | -        | 11.25      | 28.05      |
| Sudan   | Africa    | -            | -          | -           | G4950     | Synthetic | -           | -                           | 17947                     | -        | -        | 11.25      | 28.15      |
| Sudan   | Africa    | -            | -          | -           | G4955     | Synthetic | -           | -                           | 1499890                   | -        | -        | 10.95      | 32.55      |
| Sudan   | Africa    | -            | -          | -           | G4956     | Synthetic | -           | -                           | 14144                     | -        | -        | 10.95      | 32.75      |
| Sudan   | Africa    | -            | -          | -           | G4958     | Synthetic | -           | -                           | 69202                     | -        | -        | 10.85      | 27.55      |
| Sudan   | Africa    | -            | -          | -           | G4959     | Synthetic | -           | -                           | 38173                     | -        | -        | 10.85      | 27.65      |
| Sudan   | Africa    | -            | -          | -           | G4968     | Synthetic | -           | -                           | 28838                     | -        | -        | 10.45      | 25.35      |
| Sudan   | Africa    | -            | -          | -           | G4970     | Synthetic | -           | -                           | 21790                     | -        | -        | 10.35      | 25.35      |

| Country | Continent | Station Name | River Name | River Basin | GloFAS ID | Provider  | Provider ID | Catchment Area Provided km² | Catchment Area GloFAS km² | LAT Prov | LON Prov | LAT GloFAS | LON GloFAS |
|---------|-----------|--------------|------------|-------------|-----------|-----------|-------------|-----------------------------|---------------------------|----------|----------|------------|------------|
| Sudan   | Africa    | -            | -          | -           | G4971     | Synthetic | -           | -                           | 32085                     | -        | -        | 10.35      | 27.35      |
| Sudan   | Africa    | -            | -          | -           | G4972     | Synthetic | -           | -                           | 109448                    | -        | -        | 10.35      | 27.45      |
| Sudan   | Africa    | -            | -          | -           | G4973     | Synthetic | -           | -                           | 15369                     | -        | -        | 10.35      | 32.05      |
| Sudan   | Africa    | -            | -          | -           | G4974     | Synthetic | -           | -                           | 1471850                   | -        | -        | 10.35      | 32.25      |
| Sudan   | Africa    | -            | -          | -           | G4975     | Synthetic | -           | -                           | 43305                     | -        | -        | 10.35      | 32.35      |
| Sudan   | Africa    | -            | -          | -           | G4976     | Synthetic | -           | -                           | 1428180                   | -        | -        | 10.25      | 32.25      |
| Sudan   | Africa    | -            | -          | -           | G4981     | Synthetic | -           | -                           | 59039                     | -        | -        | 9.85       | 27.55      |
| Sudan   | Africa    | -            | -          | -           | G4982     | Synthetic | -           | -                           | 15853                     | -        | -        | 9.85       | 29.15      |
| Sudan   | Africa    | -            | -          | -           | G4985     | Synthetic | -           | -                           | 82654                     | -        | -        | 9.75       | 27.55      |
| Sudan   | Africa    | -            | -          | -           | G4986     | Synthetic | -           | -                           | 23160                     | -        | -        | 9.75       | 29.05      |
| Sudan   | Africa    | -            | -          | -           | G4987     | Synthetic | -           | -                           | 16296                     | -        | -        | 9.75       | 32.75      |
| Sudan   | Africa    | -            | -          | -           | G4988     | Synthetic | -           | -                           | 16505                     | -        | -        | 9.75       | 32.85      |
| Sudan   | Africa    | -            | -          | -           | G4996     | Synthetic | -           | -                           | 12306                     | -        | -        | 9.55       | 30.35      |
| Sudan   | Africa    | -            | -          | -           | G4997     | Synthetic | -           | -                           | 589088                    | -        | -        | 9.45       | 30.35      |
| Sudan   | Africa    | -            | -          | -           | G4998     | Synthetic | -           | -                           | 551604                    | -        | -        | 9.45       | 30.45      |
| Sudan   | Africa    | -            | -          | -           | G4999     | Synthetic | -           | -                           | 1166680                   | -        | -        | 9.45       | 31.05      |
| Sudan   | Africa    | -            | -          | -           | G5002     | Synthetic | -           | -                           | 23604                     | -        | -        | 9.35       | 31.15      |
| Sudan   | Africa    | -            | -          | -           | G5003     | Synthetic | -           | -                           | 1200570                   | -        | -        | 9.35       | 31.45      |
| Sudan   | Africa    | -            | -          | -           | G5007     | Synthetic | -           | -                           | 302435                    | -        | -        | 9.25       | 29.05      |
| Sudan   | Africa    | -            | -          | -           | G5008     | Synthetic | -           | -                           | 43537                     | -        | -        | 9.25       | 29.65      |
| Sudan   | Africa    | -            | -          | -           | G5009     | Synthetic | -           | -                           | 215498                    | -        | -        | 9.25       | 31.65      |
| Sudan   | Africa    | -            | -          | -           | G5010     | Synthetic | -           | -                           | 197076                    | -        | -        | 9.25       | 31.75      |
| Sudan   | Africa    | -            | -          | -           | G5013     | Synthetic | -           | -                           | 33247                     | -        | -        | 9.15       | 26.75      |
| Sudan   | Africa    | -            | -          | -           | G5014     | Synthetic | -           | -                           | 378532                    | -        | -        | 9.15       | 29.45      |
| Sudan   | Africa    | -            | -          | -           | G5015     | Synthetic | -           | -                           | 540901                    | -        | -        | 9.15       | 29.65      |
| Sudan   | Africa    | -            | -          | -           | G5016     | Synthetic | -           | -                           | 17809                     | -        | -        | 9.15       | 31.75      |
| Sudan   | Africa    | -            | -          | -           | G5019     | Synthetic | -           | -                           | 18673                     | -        | -        | 9.05       | 26.85      |
| Sudan   | Africa    | -            | -          | -           | G5020     | Synthetic | -           | -                           | 75362                     | -        | -        | 9.05       | 29.05      |
| Sudan   | Africa    | -            | -          | -           | G5021     | Synthetic | -           | -                           | 154895                    | -        | -        | 9.05       | 29.35      |
| Sudan   | Africa    | -            | -          | -           | G5035     | Synthetic | -           | -                           | 61834                     | -        | -        | 8.65       | 29.15      |
| Sudan   | Africa    | -            | -          | -           | G5036     | Synthetic | -           | -                           | 75836                     | -        | -        | 8.65       | 29.25      |
| Sudan   | Africa    | -            | -          | -           | G5037     | Synthetic | -           | -                           | 77466                     | -        | -        | 8.65       | 29.35      |
| Sudan   | Africa    | -            | -          | -           | G5041     | Synthetic | -           | -                           | 13879                     | -        | -        | 8.55       | 29.25      |
| Sudan   | Africa    | -            | -          | -           | G5044     | Synthetic | -           | -                           | 38785                     | -        | -        | 8.45       | 33.25      |
| Sudan   | Africa    | -            | -          | -           | G5046     | Synthetic | -           | -                           | 139025                    | -        | -        | 8.35       | 33.15      |
| Sudan   | Africa    | -            | -          | -           | G5051     | Synthetic | -           | -                           | 41519                     | -        | -        | 8.15       | 29.85      |
| Sudan   | Africa    | -            | -          | -           | G5054     | Synthetic | -           | -                           | 29196                     | -        | -        | 8.05       | 29.75      |
| Sudan   | Africa    | -            | -          | -           | G5055     | Synthetic | -           | -                           | 124517                    | -        | -        | 8.05       | 33.05      |
| Sudan   | Africa    | -            | -          | -           | G5061     | Synthetic | -           | -                           | 101006                    | -        | -        | 7.75       | 32.95      |

| Country   | Continent | Station Name         | River Name  | River Basin | GloFAS ID | Provider  | Provider ID | Catchment Area Provided km² | Catchment Area GloFAS km² | LAT Prov | LON Prov | LAT GloFAS | LON GloFAS |
|-----------|-----------|----------------------|-------------|-------------|-----------|-----------|-------------|-----------------------------|---------------------------|----------|----------|------------|------------|
| Sudan     | Africa    | -                    | -           | -           | G5062     | Synthetic | -           | -                           | 23020                     | -        | -        | 7.75       | 33.05      |
| Sudan     | Africa    | -                    | -           | -           | G5072     | Synthetic | -           | -                           | 19702                     | -        | -        | 7.55       | 27.95      |
| Sudan     | Africa    | -                    | -           | -           | G5073     | Synthetic | -           | -                           | 31940                     | -        | -        | 7.55       | 28.15      |
| Sudan     | Africa    | -                    | -           | -           | G5074     | Synthetic | -           | -                           | 82419                     | -        | -        | 7.55       | 32.95      |
| Sudan     | Africa    | -                    | -           | -           | G5075     | Synthetic | -           | -                           | 13788                     | -        | -        | 7.55       | 33.05      |
| Sudan     | Africa    | -                    | -           | -           | G5077     | Synthetic | -           | -                           | 17990                     | -        | -        | 7.45       | 29.65      |
| Sudan     | Africa    | -                    | -           | -           | G5078     | Synthetic | -           | -                           | 13936                     | -        | -        | 7.45       | 29.75      |
| Sudan     | Africa    | -                    | -           | -           | G5079     | Synthetic | -           | -                           | 26530                     | -        | -        | 7.45       | 30.45      |
| Sudan     | Africa    | -                    | -           | -           | G5080     | Synthetic | -           | -                           | 513045                    | -        | -        | 7.35       | 30.65      |
| Sudan     | Africa    | -                    | -           | -           | G5092     | Synthetic | -           | -                           | 39502                     | -        | -        | 6.75       | 33.05      |
| Sudan     | Africa    | -                    | -           | -           | G5093     | Synthetic | -           | -                           | 39102                     | -        | -        | 6.75       | 33.15      |
| Sudan     | Africa    | -                    | -           | -           | G5095     | Synthetic | -           | -                           | 13079                     | -        | -        | 6.65       | 32.85      |
| Sudan     | Africa    | -                    | -           | -           | G5098     | Synthetic | -           | -                           | 26053                     | -        | -        | 6.55       | 32.95      |
| Sudan     | Africa    | -                    | -           | -           | G5100     | Synthetic | -           | -                           | 12704                     | -        | -        | 6.35       | 31.35      |
| Sudan     | Africa    | -                    | -           | -           | G5106     | Synthetic | -           | -                           | 491230                    | -        | -        | 6.25       | 31.55      |
| Sudan     | Africa    | -                    | -           | -           | G5161     | Synthetic | -           | -                           | 31776                     | -        | -        | 3.75       | 31.95      |
| Sudan     | Africa    | -                    | -           | -           | G5163     | Synthetic | -           | -                           | 431174                    | -        | -        | 3.65       | 31.95      |
| Swaziland | Africa    | Siphofaneni 68632206 | Usutu       | Maputo      | G1443     | GRDC      | 1599100     | 12869                       | 12427                     | -        | 31.680   | -26.65     | 31.65      |
| Tanzania  | Africa    | Morogoro Road Bridge | Ruvu        | Ruvu        | G1216     | GRDC      | 1289450     | 15916                       | 15007                     | -        | 38.698   | -6.75      | 38.65      |
| Tanzania  | Africa    | -                    | Great Ruaha | Rufiji      | G1892     | DFO       | 1290        | -                           | 172994                    | -8.055   | 39.015   | -8.05      | 38.95      |
| Tanzania  | Africa    | -                    | Kilombero   | Rufiji      | G1893     | DFO       | 1292        | -                           | 31392                     | -8.145   | 36.765   | -8.15      | 36.75      |
| Tanzania  | Africa    | -                    | -           | -           | G5347     | Synthetic | -           | -                           | 12689                     | -        | -        | -2.45      | 30.75      |
| Tanzania  | Africa    | -                    | -           | -           | G5428     | Synthetic | -           | -                           | 28314                     | -        | -        | -4.55      | 31.45      |
| Tanzania  | Africa    | -                    | -           | -           | G5432     | Synthetic | -           | -                           | 17200                     | -        | -        | -4.65      | 31.55      |
| Tanzania  | Africa    | -                    | -           | -           | G5445     | Synthetic | -           | -                           | 16108                     | -        | -        | -4.95      | 30.95      |
| Tanzania  | Africa    | -                    | -           | -           | G5446     | Synthetic | -           | -                           | 49934                     | -        | -        | -4.95      | 31.05      |
| Tanzania  | Africa    | -                    | -           | -           | G5450     | Synthetic | -           | -                           | 13665                     | -        | -        | -3.85      | 37.45      |
| Tanzania  | Africa    | -                    | -           | -           | G5456     | Synthetic | -           | -                           | 67024                     | -        | -        | -5.15      | 30.75      |
| Tanzania  | Africa    | -                    | -           | -           | G5457     | Synthetic | -           | -                           | 13132                     | -        | -        | -5.15      | 38.25      |
| Tanzania  | Africa    | -                    | -           | -           | G5461     | Synthetic | -           | -                           | 53384                     | -        | -        | -5.25      | 30.75      |
| Tanzania  | Africa    | -                    | -           | -           | G5510     | Synthetic | -           | -                           | 27477                     | -        | -        | -7.05      | 35.75      |
| Tanzania  | Africa    | -                    | -           | -           | G5512     | Synthetic | -           | -                           | 37796                     | -        | -        | -7.15      | 35.75      |
| Tanzania  | Africa    | -                    | -           | -           | G5524     | Synthetic | -           | -                           | 21713                     | -        | -        | -7.55      | 31.75      |
| Tanzania  | Africa    | -                    | -           | -           | G5528     | Synthetic | -           | -                           | 17569                     | -        | -        | -7.65      | 31.75      |
| Tanzania  | Africa    | -                    | -           | -           | G5532     | Synthetic | -           | -                           | 86482                     | -        | -        | -7.85      | 37.75      |
| Tanzania  | Africa    | -                    | -           | -           | G5533     | Synthetic | -           | -                           | 71193                     | -        | -        | -7.95      | 37.75      |
| Tanzania  | Africa    | -                    | -           | -           | G5545     | Synthetic | -           | -                           | 40008                     | -        | -        | -8.55      | 37.25      |
| Tanzania  | Africa    | -                    | -           | -           | G5547     | Synthetic | -           | -                           | 25356                     | -        | -        | -8.65      | 37.35      |
| Tanzania  | Africa    | -                    | -           | -           | G5602     | Synthetic | -           | -                           | 75083                     | -        | -        | -11.35     | 38.35      |

| Country        | Continent | Station Name            | River Name       | River Basin | GloFAS ID | Provider  | Provider ID | Catchment Area Provided km² | Catchment Area GloFAS km² | LAT Prov | LON Prov | LAT GloFAS | LON GloFAS |
|----------------|-----------|-------------------------|------------------|-------------|-----------|-----------|-------------|-----------------------------|---------------------------|----------|----------|------------|------------|
| Togo           | Africa    | Athieme                 | Mono             | Mono        | G1089     | GRDC      | 1732100     | 21575                       | 21614                     | 6.92     | 1.67     | 6.85       | 1.55       |
| Togo           | Africa    | Reservoir Nangbeto      | Mono             | Mono        | G5067     | Red       | -           | -                           | 15832                     | -        | -        | 7.45       | 1.45       |
| Tunisia        | Africa    | -                       | -                | -           | G4233     | Synthetic | -           | -                           | 28960                     | -        | -        | 33.75      | 8.35       |
| Uganda         | Africa    | -                       | -                | -           | G5179     | Synthetic | -           | -                           | 352038                    | -        | -        | 2.25       | 31.45      |
| Uganda         | Africa    | -                       | -                | -           | G5194     | Synthetic | -           | -                           | 323961                    | -        | -        | 1.65       | 32.15      |
| Uganda         | Africa    | -                       | -                | -           | G5195     | Synthetic | -           | -                           | 16327                     | -        | -        | 1.55       | 32.05      |
| Uganda         | Africa    | Uganda Gauge            | Akokoro          | Nile        | G5196     | Red       | -           | -                           | 13356                     | 1.8      | 33.9     | 1.75       | 33.85      |
| Uganda         | Africa    | Magoro Ngariam          | Apapi            | Nile        | G5200     | Red       | -           | -                           | 10019                     | 1.6      | 34.1     | 1.65       | 33.95      |
| Uganda         | Africa    | -                       | -                | -           | G5230     | Synthetic | -           | -                           | 244186                    | -        | -        | -0.25      | 33.15      |
| Uganda         | Africa    | Kapelebyong             | Akokoro          | Nile        | G6106     | Red       | -           | -                           | 5070                      | 2.2      | 33.9     | 2.45       | 34.05      |
| Western Sahara | Africa    | -                       | -                | -           | G4476     | Synthetic | -           | -                           | 11725                     | -        | -        | 26.95      | -11.45     |
| Western Sahara | Africa    | -                       | -                | -           | G4484     | Synthetic | -           | -                           | 32734                     | -        | -        | 26.85      | -13.05     |
| Western Sahara | Africa    | -                       | -                | -           | G4485     | Synthetic | -           | -                           | 37098                     | -        | -        | 26.85      | -12.95     |
| Western Sahara | Africa    | -                       | -                | -           | G4486     | Synthetic | -           | -                           | 17154                     | -        | -        | 26.85      | -11.45     |
| Zambia         | Africa    | Near Chibote            | Lufubu           | Congo       | G1264     | GRDC      | 1593202     | -                           | 10872                     | -        | 29.55    | -9.55      | 29.45      |
| Zambia         | Africa    | Chunga Ranch            | Kalungu Wa Bwiba | Congo       | G1265     | GRDC      | 1593710     | -                           | 5076                      | -9.93    | 32.13    | -9.85      | 32.05      |
| Zambia         | Africa    | Mbesuma Pontoon         | Chambeshi        | Congo       | G1269     | GRDC      | 1593702     | 13276                       | 10758                     | -10      | 32.166   | -9.85      | 32.15      |
| Zambia         | Africa    | Pump House              | Lukupa           | Congo       | G1271     | GRDC      | 1593730     | -                           | 6517                      | -        | 30.966   | -10.15     | 30.95      |
| Zambia         | Africa    | Old Pontoon             | Chambeshi        | Congo       | G1279     | GRDC      | 1593700     | 34745                       | 30884                     | -10.95   | 31.07    | -10.95     | 31.15      |
| Zambia         | Africa    | Chembe Ferry            | Luapula          | Congo       | G1294     | GRDC      | 1593100     | 123072                      | 122560                    | -        | 28.75    | -11.95     | 28.75      |
| Zambia         | Africa    | Konikombe Hills         | Kafue            | Zambezi     | G1299     | GRDC      | 1591482     | 11655                       | 716                       | -        | 26.8     | -12.25     | 26.75      |
| Zambia         | Africa    | Katete Boma             | Katete           | Zambezi     | G1310     | GRDC      | 1591710     | -                           | 237                       | -13.15   | 32.816   | -13.25     | 32.75      |
| Zambia         | Africa    | Mpatamato               | Kafue            | Zambezi     | G1312     | GRDC      | 1591471     | 12001                       | 11439                     | -13.25   | 28.133   | -13.15     | 28.15      |
| Zambia         | Africa    | Ndubeni                 | Kafue            | Zambezi     | G1314     | GRDC      | 1591470     | 18509                       | 18553                     | -13.4    | 27.82    | -13.35     | 27.85      |
| Zambia         | Africa    | Manyinga                | Manyinga         | Zambezi     | G1315     | GRDC      | 1591235     | -                           | 118                       | -        | 24.333   | -13.45     | 24.25      |
| Zambia         | Africa    | Kabompo Pontoon         | Kabompo          | Zambezi     | G1319     | GRDC      | 1591231     | 42740                       | 41852                     | -13.6    | 24.216   | -13.55     | 24.25      |
| Zambia         | Africa    | Kafironda               | Kafue            | Zambezi     | G1320     | GRDC      | 1591474     | -                           | 23182                     | -        | 27.59    | -13.65     | 27.65      |
| Zambia         | Africa    | Machiya Ferry 60334280  | Kafue            | Zambezi     | G1321     | GRDC      | 1591406     | 23065                       | 23182                     | -13.65   | 27.616   | -13.65     | 27.65      |
| Zambia         | Africa    | Kelongwa School         | Lunga            | Zambezi     | G1323     | GRDC      | 1591435     | 19779                       | 19861                     | -13.7    | 26.333   | -13.65     | 26.35      |
| Zambia         | Africa    | Lukulu 60370030         | Zambezi          | Zambezi     | G1328     | GRDC      | 1591002     | 206531                      | 210570                    | -        | 23.233   | -14.45     | 23.15      |
| Zambia         | Africa    | Mswebi                  | Kafue            | Zambezi     | G1329     | GRDC      | 1591405     | 50479                       | 49997                     | -        | 27       | -14.45     | 27.05      |
| Zambia         | Africa    | Lubungu 60334450        | Kafue            | Zambezi     | G1331     | GRDC      | 1591408     | 55669                       | 54120                     | -        | 26.45    | -14.45     | 26.55      |
| Zambia         | Africa    | Kafue Hook Bridge       | Kafue            | Zambezi     | G1338     | GRDC      | 1591404     | 96239                       | 95090                     | -        | 25.916   | -14.95     | 25.95      |
| Zambia         | Africa    | Kalabo                  | Luanginga        | Zambezi     | G1339     | GRDC      | 1591820     | 34621                       | 32860                     | -        | 22.683   | -14.95     | 22.65      |
| Zambia         | Africa    | Luangwa Road Bridge     | Luangwa          | Zambezi     | G1340     | GRDC      | 1591730     | 142760                      | 142698                    | -        | 30.216   | -15.15     | 30.25      |
| Zambia         | Africa    | Great North Road Bridge | Mwembeshi        | Zambezi     | G1343     | GRDC      | 1591430     | -                           | 821                       | -        | 28.166   | -15.15     | 28.05      |
| Zambia         | Africa    | Ngwerere Confluence     | Chongwe          | Zambezi     | G1344     | GRDC      | 1591800     | -                           | 1406                      | -        | 28.5     | -15.25     | 28.55      |
| Zambia         | Africa    | Nyimba                  | Kafue            | Zambezi     | G1351     | GRDC      | 1591402     | 136234                      | 137196                    | -15.75   | 27.03    | -15.75     | 27.45      |
| Zambia         | Africa    | Itezhi Tezhi            | Kafue            | Zambezi     | G1352     | GRDC      | 1591403     | 105672                      | 105737                    | -        | 26.016   | -15.75     | 26.05      |

| Country  | Continent | Station Name             | River Name | River Basin | GloFAS ID | Provider  | Provider ID | Catchment Area Provided km² | Catchment Area GloFAS km² | LAT Prov | LON Prov | LAT GloFAS | LON GloFAS |
|----------|-----------|--------------------------|------------|-------------|-----------|-----------|-------------|-----------------------------|---------------------------|----------|----------|------------|------------|
| Zambia   | Africa    | Kasaka 60334977          | Kafue      | Zambezi     | G1353     | GRDC      | 1591401     | 153351                      | 150062                    | -        | 28.216   | -15.85     | 28.25      |
| Zambia   | Africa    | Senanga 60370001         | Zambezi    | Zambezi     | G1361     | GRDC      | 1591001     | 284538                      | 285458                    | -        | 23.25    | -16.05     | 23.25      |
| Zambia   | Africa    | -                        | Chambeshi  | Congo       | G1735     | DFO       | 94          | -                           | 49544                     | -        | 30.555   | -11.35     | 30.55      |
| Zambia   | Africa    | -                        | Luangwa    | Zambezi     | G1783     | DFO       | 261         | -                           | 143167                    | -        | 30.375   | -15.35     | 30.35      |
| Zambia   | Africa    | -                        | Zambezi    | Zambezi     | G1791     | DFO       | 277         | -                           | 294562                    | -        | 23.265   | -16.25     | 23.25      |
| Zambia   | Africa    | -                        | Zambezi    | Zambezi     | G1792     | DFO       | 278         | -                           | 276915                    | -        | 22.995   | -15.35     | 22.95      |
| Zambia   | Africa    | -                        | -          | -           | G5604     | Synthetic | -           | -                           | 127929                    | -        | -        | -11.65     | 28.45      |
| Zambia   | Africa    | -                        | -          | -           | G5607     | Synthetic | -           | -                           | 16341                     | -        | -        | -11.45     | 29.85      |
| Zambia   | Africa    | -                        | -          | -           | G5608     | Synthetic | -           | -                           | 18016                     | -        | -        | -11.85     | 29.75      |
| Zambia   | Africa    | -                        | -          | -           | G5649     | Synthetic | -           | -                           | 44102                     | -        | -        | -13.95     | 23.95      |
| Zambia   | Africa    | -                        | -          | -           | G5651     | Synthetic | -           | -                           | 21278                     | -        | -        | -14.05     | 23.95      |
| Zambia   | Africa    | -                        | -          | -           | G5652     | Synthetic | -           | -                           | 92129                     | -        | -        | -14.25     | 23.15      |
| Zambia   | Africa    | -                        | -          | -           | G5653     | Synthetic | -           | -                           | 35623                     | -        | -        | -14.25     | 27.35      |
| Zambia   | Africa    | -                        | -          | -           | G5655     | Synthetic | -           | -                           | 24467                     | -        | -        | -14.45     | 26.35      |
| Zambia   | Africa    | -                        | -          | -           | G5656     | Synthetic | -           | -                           | 12491                     | -        | -        | -14.45     | 27.35      |
| Zambia   | Africa    | -                        | -          | -           | G5657     | Synthetic | -           | -                           | 14899                     | -        | -        | -14.55     | 29.95      |
| Zambia   | Africa    | -                        | -          | -           | G5658     | Synthetic | -           | -                           | 27572                     | -        | -        | -14.65     | 29.85      |
| Zambia   | Africa    | -                        | -          | -           | G5660     | Synthetic | -           | -                           | 22537                     | -        | -        | -14.85     | 23.15      |
| Zambia   | Africa    | -                        | -          | -           | G5661     | Synthetic | -           | -                           | 43411                     | -        | -        | -14.85     | 30.15      |
| Zambia   | Africa    | -                        | -          | -           | G5662     | Synthetic | -           | -                           | 95298                     | -        | -        | -14.85     | 30.25      |
| Zambia   | Africa    | -                        | -          | -           | G5664     | Synthetic | -           | -                           | 13616                     | -        | -        | -14.95     | 22.45      |
| Zambia   | Africa    | -                        | -          | -           | G5665     | Synthetic | -           | -                           | 234635                    | -        | -        | -15.15     | 22.95      |
| Zambia   | Africa    | -                        | -          | -           | G5676     | Synthetic | -           | -                           | 146328                    | -        | -        | -15.55     | 30.35      |
| Zambia   | Africa    | -                        | -          | -           | G5683     | Synthetic | -           | -                           | 151696                    | -        | -        | -15.95     | 28.55      |
| Zambia   | Africa    | -                        | -          | -           | G5696     | Synthetic | -           | -                           | 12500                     | -        | -        | -16.35     | 23.45      |
| Zambia   | Africa    | -                        | -          | -           | G5727     | Synthetic | -           | -                           | 17948                     | -        | -        | -17.45     | 24.95      |
| Zimbabwe | Africa    | Copper Queen C S         | Munyati    | Zambezi     | G1374     | GRDC      | 1491590     | 37300                       | 37614                     | -17.5    | 29.4     | -17.45     | 29.35      |
| Zimbabwe | Africa    | Dahlia Control Section   | Gwaai      | Zambezi     | G1389     | GRDC      | 1491210     | 20371                       | 37564                     | -18.6    | 27.166   | -18.55     | 27.15      |
| Zimbabwe | Africa    | Condo D S G W 63422121   | Save       | Save        | G1392     | GRDC      | 1495700     | 11174                       | 9928                      | -        | 32.016   | -19.15     | 31.95      |
| Zimbabwe | Africa    | Beitbridge Pumpstation C | Limpopo    | Limpopo     | G1415     | GRDC      | 1496500     | 208784                      | 208681                    | -        | 29.983   | -22.35     | 30.25      |
| Zimbabwe | Africa    | -                        | -          | -           | G5687     | Synthetic | -           | -                           | 666857                    | -        | -        | -16.45     | 28.85      |
| Zimbabwe | Africa    | -                        | -          | -           | G5732     | Synthetic | -           | -                           | 24414                     | -        | -        | -17.65     | 29.35      |
| Zimbabwe | Africa    | -                        | -          | -           | G5748     | Synthetic | -           | -                           | 530381                    | -        | -        | -18.05     | 26.75      |
| Zimbabwe | Africa    | -                        | -          | -           | G5751     | Synthetic | -           | -                           | 42476                     | -        | -        | -18.15     | 26.85      |
| Zimbabwe | Africa    | -                        | -          | -           | G5847     | Synthetic | -           | -                           | 42026                     | -        | -        | -21.25     | 32.35      |
| Zimbabwe | Africa    | -                        | -          | -           | G5848     | Synthetic | -           | -                           | 39618                     | -        | -        | -21.35     | 32.35      |
| Zimbabwe | Africa    | -                        | -          | -           | G5854     | Synthetic | -           | -                           | 28099                     | -        | -        | -22.05     | 29.25      |

Table 2: GloFAS diagnostic points for Asia.

| Country     | Continent | Station Name    | River Name  | River Basin | GloFAS ID | Provider  | Provider ID | Catchment Area Provided km <sup>2</sup> | Catchment Area GloFAS km <sup>2</sup> | LAT Prov | LON Prov | LAT GloFAS | LON GloFAS |
|-------------|-----------|-----------------|-------------|-------------|-----------|-----------|-------------|-----------------------------------------|---------------------------------------|----------|----------|------------|------------|
| Afghanistan | Asia      | -               | Kabul       | Indus       | G1802     | DFO       | 296         | -                                       | 68192                                 | 34.334   | 70.785   | 34.35      | 70.75      |
| Afghanistan | Asia      | -               | -           | -           | G4085     | Synthetic | -           | -                                       | 31190                                 | -        | -        | 37.85      | 71.55      |
| Afghanistan | Asia      | -               | -           | -           | G4092     | Synthetic | -           | -                                       | 15448                                 | -        | -        | 37.45      | 71.45      |
| Afghanistan | Asia      | -               | -           | -           | G4094     | Synthetic | -           | -                                       | 232473                                | -        | -        | 37.35      | 66.85      |
| Afghanistan | Asia      | -               | -           | -           | G4100     | Synthetic | -           | -                                       | 14671                                 | -        | -        | 37.25      | 66.75      |
| Afghanistan | Asia      | -               | -           | -           | G4102     | Synthetic | -           | -                                       | 91819                                 | -        | -        | 37.25      | 69.45      |
| Afghanistan | Asia      | -               | -           | -           | G4112     | Synthetic | -           | -                                       | 117352                                | -        | -        | 37.05      | 68.35      |
| Afghanistan | Asia      | -               | -           | -           | G4113     | Synthetic | -           | -                                       | 21253                                 | -        | -        | 37.05      | 69.45      |
| Afghanistan | Asia      | -               | -           | -           | G4115     | Synthetic | -           | -                                       | 37327                                 | -        | -        | 36.95      | 68.25      |
| Afghanistan | Asia      | -               | -           | -           | G4116     | Synthetic | -           | -                                       | 12370                                 | -        | -        | 36.85      | 68.65      |
| Afghanistan | Asia      | -               | -           | -           | G4121     | Synthetic | -           | -                                       | 23560                                 | -        | -        | 36.75      | 68.65      |
| Afghanistan | Asia      | -               | -           | -           | G4181     | Synthetic | -           | -                                       | 12148                                 | -        | -        | 34.75      | 69.55      |
| Afghanistan | Asia      | -               | -           | -           | G4196     | Synthetic | -           | -                                       | 14241                                 | -        | -        | 34.55      | 69.55      |
| Afghanistan | Asia      | -               | -           | -           | G4201     | Synthetic | -           | -                                       | 39300                                 | -        | -        | 34.45      | 70.45      |
| Afghanistan | Asia      | -               | -           | -           | G4202     | Synthetic | -           | -                                       | 26316                                 | -        | -        | 34.45      | 70.55      |
| Afghanistan | Asia      | -               | -           | -           | G4250     | Synthetic | -           | -                                       | 11731                                 | -        | -        | 32.95      | 65.45      |
| Afghanistan | Asia      | -               | -           | -           | G4251     | Synthetic | -           | -                                       | 24428                                 | -        | -        | 32.95      | 65.65      |
| Afghanistan | Asia      | -               | -           | -           | G4282     | Synthetic | -           | -                                       | 15532                                 | -        | -        | 32.05      | 61.15      |
| Afghanistan | Asia      | -               | -           | -           | G4299     | Synthetic | -           | -                                       | 61262                                 | -        | -        | 31.55      | 64.35      |
| Afghanistan | Asia      | -               | -           | -           | G4300     | Synthetic | -           | -                                       | 76983                                 | -        | -        | 31.55      | 64.45      |
| Afghanistan | Asia      | -               | -           | -           | G4301     | Synthetic | -           | -                                       | 15342                                 | -        | -        | 31.55      | 65.45      |
| Afghanistan | Asia      | -               | -           | -           | G4303     | Synthetic | -           | -                                       | 54420                                 | -        | -        | 31.45      | 65.45      |
| Afghanistan | Asia      | -               | -           | -           | G4310     | Synthetic | -           | -                                       | 11615                                 | -        | -        | 31.35      | 61.85      |
| Afghanistan | Asia      | -               | -           | -           | G4334     | Synthetic | -           | -                                       | 167262                                | -        | -        | 30.95      | 61.85      |
| Afghanistan | Asia      | -               | -           | -           | G4335     | Synthetic | -           | -                                       | 22672                                 | -        | -        | 30.95      | 61.95      |
| Azerbaijan  | Asia      | Surra           | Kura        | Kura        | G0728     | GRDC      | 6990700     | 178000                                  | 181968                                | 40.079   | 48.525   | 40.05      | 48.45      |
| Azerbaijan  | Asia      | -               | -           | -           | G3921     | Synthetic | -           | -                                       | 11886                                 | -        | -        | 41.05      | 46.65      |
| Azerbaijan  | Asia      | -               | -           | -           | G4015     | Synthetic | -           | -                                       | 78766                                 | -        | -        | 39.35      | 47.25      |
| Bangladesh  | Asia      | Kaunia          | Tista       | Brahmaputra | G0927     | GRDC      | 2651080     | -                                       | 12507                                 | 25.75    | 89.5     | 25.75      | 89.45      |
| Bangladesh  | Asia      | Bahadurabad     | Brahmaputra | Brahmaputra | G0928     | Red       | -           | 520829                                  | 518898                                | 25.11    | 89.67    | 25.15      | 89.65      |
| Bangladesh  | Asia      | Hardinge Bridge | Ganges      | Ganges      | G0930     | Red       | -           | 955098                                  | 951786                                | 24.064   | 89.03    | 24.05      | 89.05      |
| Bangladesh  | Asia      | -               | Jamuna      | Brahmaputra | G1709     | DFO       | 20          | -                                       | 503361                                | 25.514   | 89.775   | 25.55      | 89.75      |
| Bangladesh  | Asia      | -               | -           | -           | G4523     | Synthetic | -           | -                                       | 12073                                 | -        | -        | 26.05      | 89.75      |
| Bangladesh  | Asia      | -               | -           | -           | G4534     | Synthetic | -           | -                                       | 23675                                 | -        | -        | 25.85      | 89.75      |
| Bangladesh  | Asia      | -               | -           | -           | G4556     | Synthetic | -           | -                                       | 13179                                 | -        | -        | 25.55      | 89.55      |
| Bangladesh  | Asia      | -               | -           | -           | G4591     | Synthetic | -           | -                                       | 17251                                 | -        | -        | 24.15      | 89.55      |
| Bangladesh  | Asia      | -               | -           | -           | G4592     | Synthetic | -           | -                                       | 526323                                | -        | -        | 24.15      | 89.65      |

| Country    | Continent | Station Name  | River Name        | River Basin       | GloFAS ID | Provider  | Provider ID | Catchment Area Provided km² | Catchment Area GloFAS km² | LAT Prov | LON Prov | LAT GloFAS | LON GloFAS |
|------------|-----------|---------------|-------------------|-------------------|-----------|-----------|-------------|-----------------------------|---------------------------|----------|----------|------------|------------|
| Bangladesh | Asia      | Bhairab bazar | Meghna            | Meghna            | G4593     | -         | -           | -                           | 67016                     | -        | -        | 24.05      | 90.95      |
| Bangladesh | Asia      | -             | -                 | -                 | G4599     | Synthetic | -           | -                           | 544028                    | -        | -        | 23.85      | 89.65      |
| Bangladesh | Asia      | -             | -                 | -                 | G4601     | Synthetic | -           | -                           | 953151                    | -        | -        | 23.75      | 89.65      |
| Bangladesh | Asia      | -             | -                 | -                 | G4604     | Synthetic | -           | -                           | 71565                     | -        | -        | 23.65      | 90.65      |
| Bangladesh | Asia      | -             | -                 | -                 | G4606     | Synthetic | -           | -                           | 11787                     | -        | -        | 23.55      | 90.45      |
| Bangladesh | Asia      | -             | -                 | -                 | G4615     | Synthetic | -           | -                           | 86091                     | -        | -        | 23.35      | 90.55      |
| Cambodia   | Asia      | Stung Treng   | Mekong            | Mekong            | G1006     | GRDC      | 2569005     | 635000                      | 646247                    | 13.533   | 105.94   | 13.55      | 105.95     |
| Cambodia   | Asia      | -             | Mekong            | Mekong            | G1719     | DFO       | 34          | -                           | 763955                    | 11.294   | 105.25   | 11.25      | 105.25     |
| Cambodia   | Asia      | -             | Tonle             | Mekong            | G1778     | DFO       | 223         | -                           | 84124                     | 12.104   | 104.80   | 12.05      | 104.75     |
| Cambodia   | Asia      | -             | -                 | -                 | G4907     | Synthetic | -           | -                           | 29393                     | -        | -        | 13.65      | 106.15     |
| Cambodia   | Asia      | -             | -                 | -                 | G4911     | Synthetic | -           | -                           | 19254                     | -        | -        | 13.55      | 106.35     |
| Cambodia   | Asia      | -             | -                 | -                 | G4914     | Synthetic | -           | -                           | 31580                     | -        | -        | 13.45      | 106.35     |
| Cambodia   | Asia      | -             | -                 | -                 | G4916     | Synthetic | -           | -                           | 15213                     | -        | -        | 13.25      | 103.45     |
| Cambodia   | Asia      | -             | -                 | -                 | G4929     | Synthetic | -           | -                           | 40700                     | -        | -        | 12.75      | 104.05     |
| Cambodia   | Asia      | -             | -                 | -                 | G4936     | Synthetic | -           | -                           | 60802                     | -        | -        | 12.35      | 104.65     |
| Cambodia   | Asia      | -             | -                 | -                 | G4937     | Synthetic | -           | -                           | 20774                     | -        | -        | 12.35      | 104.85     |
| Cambodia   | Asia      | -             | -                 | -                 | G4946     | Synthetic | -           | -                           | 672904                    | -        | -        | 11.65      | 104.95     |
| China      | Asia      | Tanglai Qu    | Yellow - Huang He | Yellow - Huang He | G0744     | GRDC      | 2180711     | 121972                      | 306739                    | 39.133   | 106.66   | 39.15      | 106.85     |
| China      | Asia      | Minhe         | Huang Shui        | Yellow - Huang He | G0804     | GRDC      | 2180400     | 15342                       | 15364                     | 36.335   | 102.81   | 36.45      | 102.85     |
| China      | Asia      | Huangheyan    | Yellow - Huang He | Yellow - Huang He | G0833     | GRDC      | 2180712     | 21000                       | 20995                     | 34.9     | 98.2     | 34.85      | 98.15      |
| China      | Asia      | Zhimenda      | Tongtian He       | Yangtze - Chang   | G0862     | GRDC      | 2181500     | 137704                      | 136740                    | 33.433   | 96.6     | 33.45      | 96.65      |
| China      | Asia      | Tiane         | Hongshui He       | Xi Jiang          | G0893     | GRDC      | 2182050     | 105535                      | 93984                     | 30.766   | 113.58   | 24.95      | 107.15     |
| China      | Asia      | Luning        | Yalong Jiang      | Yangtze - Chang   | G0916     | GRDC      | 2181300     | 58943                       | 107872                    | 28.5     | 101.83   | 28.55      | 101.75     |
| China      | Asia      | Tongmeng      | Nen Jiang         | Amur              | G0931     | GRDC      | 2178100     | 108029                      | 110367                    | 23.285   | 116.42   | 48.15      | 124.45     |
| China      | Asia      | -             | Poyang            | Yangtze - Chang   | G1720     | DFO       | 38          | -                           | 162569                    | 29.294   | 116.05   | 29.35      | 116.05     |
| China      | Asia      | -             | Gan               | Yangtze - Chang   | G1746     | DFO       | 114         | -                           | 82692                     | 28.394   | 115.78   | 28.45      | 115.85     |
| China      | Asia      | -             | Poyang            | Yangtze - Chang   | G1747     | DFO       | 116         | -                           | 163436                    | 29.564   | 116.14   | 29.65      | 116.15     |
| China      | Asia      | -             | Ju                | Yangtze - Chang   | G1748     | DFO       | 118         | -                           | 3515                      | 30.824   | 114.79   | 30.85      | 114.75     |
| China      | Asia      | -             | Han               | Yangtze - Chang   | G1749     | DFO       | 119         | -                           | 1068                      | 30.734   | 114.16   | 30.75      | 114.15     |
| China      | Asia      | -             | Shahu             | Yangtze - Chang   | G1750     | DFO       | 121         | -                           | 4940                      | 30.104   | 113.62   | 30.15      | 113.65     |
| China      | Asia      | -             | Yangtze           | Yangtze - Chang   | G1751     | DFO       | 123         | -                           | 1021250                   | 29.744   | 112.63   | 29.75      | 112.55     |
| China      | Asia      | -             | Muluwusuhe        | Yangtze - Chang   | G1933     | DFO       | 2021        | -                           | 83828                     | 34.694   | 94.725   | 34.75      | 94.75      |
| China      | Asia      | -             | Yellow - Huang He | Yellow - Huang He | G1944     | DFO       | 2074        | -                           | 296924                    | 38.924   | 106.78   | 38.95      | 106.75     |
| China      | Asia      | -             | Yellow - Huang He | Yellow - Huang He | G1945     | DFO       | 2075        | -                           | 278780                    | 37.574   | 105.79   | 37.55      | 105.75     |
| China      | Asia      | -             | Yellow - Huang He | Yellow - Huang He | G1946     | DFO       | 2077        | -                           | 511265                    | 35.504   | 110.56   | 35.55      | 110.55     |
| China      | Asia      | -             | Yiluo He          | Yellow - Huang He | G1947     | DFO       | 2078        | -                           | 17926                     | 34.694   | 112.81   | 34.65      | 112.85     |
| China      | Asia      | -             | Yellow - Huang He | Yellow - Huang He | G1948     | DFO       | 2079        | -                           | 739953                    | 34.964   | 113.53   | 34.95      | 113.45     |
| China      | Asia      | -             | Yellow - Huang He | Yellow - Huang He | G1949     | DFO       | 2080        | -                           | 742510                    | 35.144   | 114.88   | 35.15      | 114.85     |
| China      | Asia      | -             | Yellow - Huang He | Yellow - Huang He | G1950     | DFO       | 2081        | -                           | 746585                    | 35.864   | 115.78   | 35.85      | 115.75     |



| Country | Continent | Station Name | River Name | River Basin     | GloFAS ID | Provider  | Provider ID | Catchment Area Provided km² | Catchment Area GloFAS km² | LAT Prov | LON Prov | LAT GloFAS | LON GloFAS |
|---------|-----------|--------------|------------|-----------------|-----------|-----------|-------------|-----------------------------|---------------------------|----------|----------|------------|------------|
| China   | Asia      | Weishan Lake | -          | -               | G1951     | DFO       | 2082        | -                           | 23754                     | 34.784   | 117.04   | 34.85      | 117.05     |
| China   | Asia      | -            | Pi         | Huai He         | G1952     | DFO       | 2085        | -                           | 5740                      | 31.994   | 116.50   | 32.05      | 116.55     |
| China   | Asia      | -            | Yangtze    | Yangtze - Chang | G1953     | DFO       | 2087        | -                           | 1735840                   | 31.724   | 118.39   | 31.75      | 118.45     |
| China   | Asia      | -            | Xiu Lake   | Yangtze - Chang | G1954     | DFO       | 2088        | -                           | 9470                      | 29.294   | 115.33   | 29.25      | 115.35     |
| China   | Asia      | -            | Xin        | Yangtze - Chang | G1955     | DFO       | 2089        | -                           | 16000                     | 28.484   | 116.77   | 28.45      | 116.75     |
| China   | Asia      | -            | Ganjan     | Yangtze - Chang | G1956     | DFO       | 2090        | -                           | 5030                      | 28.394   | 117.94   | 28.45      | 117.95     |
| China   | Asia      | -            | Qu         | Fuchun Jiang    | G1957     | DFO       | 2091        | -                           | 10251                     | 29.024   | 119.11   | 29.05      | 119.15     |
| China   | Asia      | -            | Fuchun     | Fuchun Jiang    | G1958     | DFO       | 2094        | -                           | 38186                     | 30.014   | 120.01   | 30.05      | 120.05     |
| China   | Asia      | -            | Min Mouth  | Min Jiang       | G1959     | DFO       | 2095        | -                           | 55532                     | 26.054   | 119.20   | 26.05      | 119.25     |
| China   | Asia      | -            | Min        | Min Jiang       | G1960     | DFO       | 2096        | -                           | 44258                     | 26.414   | 118.48   | 26.45      | 118.45     |
| China   | Asia      | -            | Jian       | Min Jiang       | G1961     | DFO       | 2097        | -                           | 15003                     | 27.044   | 118.30   | 27.05      | 118.25     |
| China   | Asia      | -            | Gan        | Yangtze - Chang | G1962     | DFO       | 2098        | -                           | 41312                     | 26.684   | 114.79   | 26.65      | 114.75     |
| China   | Asia      | -            | Han        | Han Jiang       | G1963     | DFO       | 2100        | -                           | 29743                     | 23.624   | 116.68   | 23.65      | 116.65     |
| China   | Asia      | -            | -          | -               | G3341     | Synthetic | -           | -                           | 460837                    | -        | -        | 53.55      | 123.25     |
| China   | Asia      | -            | -          | -               | G3355     | Synthetic | -           | -                           | 16561                     | -        | -        | 53.35      | 123.95     |
| China   | Asia      | -            | -          | -               | G3414     | Synthetic | -           | -                           | 16489                     | -        | -        | 52.05      | 120.75     |
| China   | Asia      | -            | -          | -               | G3445     | Synthetic | -           | -                           | 31507                     | -        | -        | 51.65      | 126.65     |
| China   | Asia      | -            | -          | -               | G3519     | Synthetic | -           | -                           | 154445                    | -        | -        | 50.35      | 119.25     |
| China   | Asia      | -            | -          | -               | G3533     | Synthetic | -           | -                           | 16078                     | -        | -        | 50.25      | 119.45     |
| China   | Asia      | -            | -          | -               | G3534     | Synthetic | -           | -                           | 563397                    | -        | -        | 50.25      | 127.45     |
| China   | Asia      | -            | -          | -               | G3541     | Synthetic | -           | -                           | 131073                    | -        | -        | 50.15      | 119.35     |
| China   | Asia      | -            | -          | -               | G3575     | Synthetic | -           | -                           | 51552                     | -        | -        | 49.55      | 117.95     |
| China   | Asia      | -            | -          | -               | G3577     | Synthetic | -           | -                           | 817516                    | -        | -        | 49.45      | 128.85     |
| China   | Asia      | -            | -          | -               | G3584     | Synthetic | -           | -                           | 33114                     | -        | -        | 49.35      | 125.25     |
| China   | Asia      | -            | -          | -               | G3585     | Synthetic | -           | -                           | 8501                      | -        | -        | 49.35      | 125.35     |
| China   | Asia      | -            | -          | -               | G3586     | Synthetic | -           | -                           | 21136                     | -        | -        | 49.35      | 128.85     |
| China   | Asia      | -            | -          | -               | G3594     | Synthetic | -           | -                           | 21151                     | -        | -        | 49.25      | 119.85     |
| China   | Asia      | -            | -          | -               | G3595     | Synthetic | -           | -                           | 20279                     | -        | -        | 49.25      | 125.05     |
| China   | Asia      | -            | -          | -               | G3596     | Synthetic | -           | -                           | 42110                     | -        | -        | 49.25      | 125.25     |
| China   | Asia      | -            | -          | -               | G3604     | Synthetic | -           | -                           | 21380                     | -        | -        | 49.15      | 119.75     |
| China   | Asia      | -            | -          | -               | G3605     | Synthetic | -           | -                           | 914855                    | -        | -        | 49.15      | 129.75     |
| China   | Asia      | -            | -          | -               | G3620     | Synthetic | -           | -                           | 10237                     | -        | -        | 48.95      | 119.65     |
| China   | Asia      | -            | -          | -               | G3621     | Synthetic | -           | -                           | 10813                     | -        | -        | 48.95      | 119.75     |
| China   | Asia      | -            | -          | -               | G3646     | Synthetic | -           | -                           | 13619                     | -        | -        | 48.35      | 124.65     |
| China   | Asia      | -            | -          | -               | G3669     | Synthetic | -           | -                           | 17226                     | -        | -        | 48.05      | 117.85     |
| China   | Asia      | -            | -          | -               | G3670     | Synthetic | -           | -                           | 1525530                   | -        | -        | 48.05      | 133.15     |
| China   | Asia      | -            | -          | -               | G3675     | Synthetic | -           | -                           | 41382                     | -        | -        | 47.85      | 86.25      |
| China   | Asia      | -            | -          | -               | G3679     | Synthetic | -           | -                           | 10282                     | -        | -        | 47.75      | 86.85      |
| China   | Asia      | -            | -          | -               | G3681     | Synthetic | -           | -                           | 957021                    | -        | -        | 47.75      | 132.45     |

| Country | Continent | Station Name | River Name | River Basin | GloFAS ID | Provider  | Provider ID | Catchment Area Provided km² | Catchment Area GloFAS km² | LAT Prov | LON Prov | LAT GloFAS | LON GloFAS |
|---------|-----------|--------------|------------|-------------|-----------|-----------|-------------|-----------------------------|---------------------------|----------|----------|------------|------------|
| China   | Asia      | -            | -          | -           | G3682     | Synthetic | -           | -                           | 165891                    | -        | -        | 47.75      | 134.75     |
| China   | Asia      | -            | -          | -           | G3685     | Synthetic | -           | -                           | 27890                     | -        | -        | 47.65      | 86.95      |
| China   | Asia      | -            | -          | -           | G3687     | Synthetic | -           | -                           | 563342                    | -        | -        | 47.65      | 132.45     |
| China   | Asia      | -            | -          | -           | G3701     | Synthetic | -           | -                           | 23750                     | -        | -        | 47.35      | 134.15     |
| China   | Asia      | -            | -          | -           | G3705     | Synthetic | -           | -                           | 136520                    | -        | -        | 47.25      | 134.15     |
| China   | Asia      | -            | -          | -           | G3711     | Synthetic | -           | -                           | 128010                    | -        | -        | 47.05      | 123.55     |
| China   | Asia      | -            | -          | -           | G3715     | Synthetic | -           | -                           | 19728                     | -        | -        | 46.95      | 123.45     |
| China   | Asia      | -            | -          | -           | G3720     | Synthetic | -           | -                           | 147996                    | -        | -        | 46.85      | 123.45     |
| China   | Asia      | -            | -          | -           | G3721     | Synthetic | -           | -                           | 15314                     | -        | -        | 46.85      | 123.95     |
| China   | Asia      | -            | -          | -           | G3722     | Synthetic | -           | -                           | 10344                     | -        | -        | 46.85      | 124.05     |
| China   | Asia      | -            | -          | -           | G3728     | Synthetic | -           | -                           | 17938                     | -        | -        | 46.75      | 123.55     |
| China   | Asia      | -            | -          | -           | G3734     | Synthetic | -           | -                           | 9462                      | -        | -        | 46.65      | 126.25     |
| China   | Asia      | -            | -          | -           | G3735     | Synthetic | -           | -                           | 20961                     | -        | -        | 46.65      | 129.75     |
| China   | Asia      | -            | -          | -           | G3739     | Synthetic | -           | -                           | 16544                     | -        | -        | 46.55      | 126.45     |
| China   | Asia      | -            | -          | -           | G3740     | Synthetic | -           | -                           | 523643                    | -        | -        | 46.55      | 129.85     |
| China   | Asia      | -            | -          | -           | G3749     | Synthetic | -           | -                           | 11333                     | -        | -        | 46.35      | 129.65     |
| China   | Asia      | -            | -          | -           | G3753     | Synthetic | -           | -                           | 471401                    | -        | -        | 46.25      | 129.45     |
| China   | Asia      | -            | -          | -           | G3754     | Synthetic | -           | -                           | 37967                     | -        | -        | 46.25      | 129.55     |
| China   | Asia      | -            | -          | -           | G3761     | Synthetic | -           | -                           | 31469                     | -        | -        | 45.95      | 126.65     |
| China   | Asia      | -            | -          | -           | G3762     | Synthetic | -           | -                           | 454514                    | -        | -        | 45.95      | 128.65     |
| China   | Asia      | -            | -          | -           | G3766     | Synthetic | -           | -                           | 9227                      | -        | -        | 45.85      | 123.85     |
| China   | Asia      | -            | -          | -           | G3767     | Synthetic | -           | -                           | 171320                    | -        | -        | 45.85      | 124.05     |
| China   | Asia      | -            | -          | -           | G3768     | Synthetic | -           | -                           | 410472                    | -        | -        | 45.85      | 126.65     |
| China   | Asia      | -            | -          | -           | G3769     | Synthetic | -           | -                           | 10961                     | -        | -        | 45.85      | 128.75     |
| China   | Asia      | -            | -          | -           | G3770     | Synthetic | -           | -                           | 17823                     | -        | -        | 45.85      | 133.35     |
| China   | Asia      | -            | -          | -           | G3771     | Synthetic | -           | -                           | 72644                     | -        | -        | 45.85      | 133.55     |
| China   | Asia      | -            | -          | -           | G3776     | Synthetic | -           | -                           | 13140                     | -        | -        | 45.75      | 85.45      |
| China   | Asia      | -            | -          | -           | G3777     | Synthetic | -           | -                           | 33007                     | -        | -        | 45.75      | 123.85     |
| China   | Asia      | -            | -          | -           | G3778     | Synthetic | -           | -                           | 9014                      | -        | -        | 45.75      | 124.85     |
| China   | Asia      | -            | -          | -           | G3779     | Synthetic | -           | -                           | 401208                    | -        | -        | 45.75      | 126.65     |
| China   | Asia      | -            | -          | -           | G3780     | Synthetic | -           | -                           | 54558                     | -        | -        | 45.75      | 133.45     |
| China   | Asia      | -            | -          | -           | G3785     | Synthetic | -           | -                           | 31753                     | -        | -        | 45.65      | 124.75     |
| China   | Asia      | -            | -          | -           | G3790     | Synthetic | -           | -                           | 50188                     | -        | -        | 45.55      | 85.35      |
| China   | Asia      | -            | -          | -           | G3792     | Synthetic | -           | -                           | 34747                     | -        | -        | 45.55      | 116.35     |
| China   | Asia      | -            | -          | -           | G3793     | Synthetic | -           | -                           | 36294                     | -        | -        | 45.55      | 116.45     |
| China   | Asia      | -            | -          | -           | G3794     | Synthetic | -           | -                           | 42346                     | -        | -        | 45.55      | 124.95     |
| China   | Asia      | -            | -          | -           | G3795     | Synthetic | -           | -                           | 24908                     | -        | -        | 45.55      | 133.35     |
| China   | Asia      | -            | -          | -           | G3800     | Synthetic | -           | -                           | 19717                     | -        | -        | 45.45      | 122.65     |
| China   | Asia      | -            | -          | -           | G3801     | Synthetic | -           | -                           | 215225                    | -        | -        | 45.45      | 124.45     |

| Country | Continent | Station Name | River Name | River Basin | GloFAS ID | Provider  | Provider ID | Catchment Area Provided km² | Catchment Area GloFAS km² | LAT Prov | LON Prov | LAT GloFAS | LON GloFAS |
|---------|-----------|--------------|------------|-------------|-----------|-----------|-------------|-----------------------------|---------------------------|----------|----------|------------|------------|
| China   | Asia      | -            | -          | -           | G3802     | Synthetic | -           | -                           | 251750                    | -        | -        | 45.45      | 124.55     |
| China   | Asia      | -            | -          | -           | G3803     | Synthetic | -           | -                           | 329808                    | -        | -        | 45.45      | 124.85     |
| China   | Asia      | -            | -          | -           | G3804     | Synthetic | -           | -                           | 376395                    | -        | -        | 45.45      | 125.55     |
| China   | Asia      | -            | -          | -           | G3805     | Synthetic | -           | -                           | 19538                     | -        | -        | 45.45      | 125.65     |
| China   | Asia      | -            | -          | -           | G3809     | Synthetic | -           | -                           | 24700                     | -        | -        | 45.35      | 85.15      |
| China   | Asia      | -            | -          | -           | G3810     | Synthetic | -           | -                           | 25047                     | -        | -        | 45.35      | 85.25      |
| China   | Asia      | -            | -          | -           | G3811     | Synthetic | -           | -                           | 9681                      | -        | -        | 45.35      | 122.65     |
| China   | Asia      | -            | -          | -           | G3812     | Synthetic | -           | -                           | 36436                     | -        | -        | 45.35      | 124.45     |
| China   | Asia      | -            | -          | -           | G3813     | Synthetic | -           | -                           | 75658                     | -        | -        | 45.35      | 124.65     |
| China   | Asia      | -            | -          | -           | G3819     | Synthetic | -           | -                           | 14584                     | -        | -        | 45.15      | 123.45     |
| China   | Asia      | -            | -          | -           | G3825     | Synthetic | -           | -                           | 13785                     | -        | -        | 44.95      | 123.45     |
| China   | Asia      | -            | -          | -           | G3829     | Synthetic | -           | -                           | 53932                     | -        | -        | 44.85      | 125.85     |
| China   | Asia      | -            | -          | -           | G3832     | Synthetic | -           | -                           | 18438                     | -        | -        | 44.75      | 125.65     |
| China   | Asia      | -            | -          | -           | G3846     | Synthetic | -           | -                           | 15298                     | -        | -        | 44.05      | 123.15     |
| China   | Asia      | -            | -          | -           | G3850     | Synthetic | -           | -                           | 28280                     | -        | -        | 43.95      | 123.15     |
| China   | Asia      | -            | -          | -           | G3856     | Synthetic | -           | -                           | 13193                     | -        | -        | 43.85      | 120.65     |
| China   | Asia      | -            | -          | -           | G3861     | Synthetic | -           | -                           | 10144                     | -        | -        | 43.75      | 81.85      |
| China   | Asia      | -            | -          | -           | G3864     | Synthetic | -           | -                           | 38145                     | -        | -        | 43.65      | 81.85      |
| China   | Asia      | -            | -          | -           | G3866     | Synthetic | -           | -                           | 85681                     | -        | -        | 43.65      | 123.35     |
| China   | Asia      | -            | -          | -           | G3867     | Synthetic | -           | -                           | 47285                     | -        | -        | 43.65      | 123.55     |
| China   | Asia      | -            | -          | -           | G3870     | Synthetic | -           | -                           | 28916                     | -        | -        | 43.45      | 120.65     |
| China   | Asia      | -            | -          | -           | G3871     | Synthetic | -           | -                           | 60616                     | -        | -        | 43.45      | 121.65     |
| China   | Asia      | -            | -          | -           | G3872     | Synthetic | -           | -                           | 134240                    | -        | -        | 43.45      | 123.55     |
| China   | Asia      | -            | -          | -           | G3873     | Synthetic | -           | -                           | 10477                     | -        | -        | 43.45      | 123.75     |
| China   | Asia      | -            | -          | -           | G3875     | Synthetic | -           | -                           | 11409                     | -        | -        | 43.35      | 118.85     |
| China   | Asia      | -            | -          | -           | G3876     | Synthetic | -           | -                           | 29510                     | -        | -        | 43.35      | 120.65     |
| China   | Asia      | -            | -          | -           | G3877     | Synthetic | -           | -                           | 12518                     | -        | -        | 43.35      | 121.75     |
| China   | Asia      | -            | -          | -           | G3878     | Synthetic | -           | -                           | 12376                     | -        | -        | 43.25      | 118.85     |
| China   | Asia      | -            | -          | -           | G3881     | Synthetic | -           | -                           | 14945                     | -        | -        | 43.15      | 126.85     |
| China   | Asia      | -            | -          | -           | G3883     | Synthetic | -           | -                           | 21075                     | -        | -        | 43.05      | 126.95     |
| China   | Asia      | -            | -          | -           | G3886     | Synthetic | -           | -                           | 13903                     | -        | -        | 42.95      | 129.75     |
| China   | Asia      | -            | -          | -           | G3889     | Synthetic | -           | -                           | 18158                     | -        | -        | 42.75      | 89.15      |
| China   | Asia      | -            | -          | -           | G3898     | Synthetic | -           | -                           | 27729                     | -        | -        | 42.05      | 86.75      |
| China   | Asia      | -            | -          | -           | G3909     | Synthetic | -           | -                           | 26601                     | -        | -        | 41.45      | 104.65     |
| China   | Asia      | -            | -          | -           | G3914     | Synthetic | -           | -                           | 11333                     | -        | -        | 41.35      | 104.45     |
| China   | Asia      | -            | -          | -           | G3915     | Synthetic | -           | -                           | 15291                     | -        | -        | 41.25      | 79.95      |
| China   | Asia      | -            | -          | -           | G3918     | Synthetic | -           | -                           | 27779                     | -        | -        | 41.15      | 79.95      |
| China   | Asia      | -            | -          | -           | G3919     | Synthetic | -           | -                           | 41339                     | -        | -        | 41.15      | 86.45      |
| China   | Asia      | -            | -          | -           | G3923     | Synthetic | -           | -                           | 15913                     | -        | -        | 41.05      | 82.55      |

| Country | Continent | Station Name | River Name | River Basin | GloFAS ID | Provider  | Provider ID | Catchment Area Provided km² | Catchment Area GloFAS km² | LAT Prov | LON Prov | LAT GloFAS | LON GloFAS |
|---------|-----------|--------------|------------|-------------|-----------|-----------|-------------|-----------------------------|---------------------------|----------|----------|------------|------------|
| China   | Asia      | -            | -          | -           | G3924     | Synthetic | -           | -                           | 393835                    | -        | -        | 41.05      | 86.05      |
| China   | Asia      | -            | -          | -           | G3925     | Synthetic | -           | -                           | 599661                    | -        | -        | 41.05      | 86.45      |
| China   | Asia      | -            | -          | -           | G3926     | Synthetic | -           | -                           | 11680                     | -        | -        | 41.05      | 122.45     |
| China   | Asia      | -            | -          | -           | G3931     | Synthetic | -           | -                           | 367063                    | -        | -        | 40.95      | 82.55      |
| China   | Asia      | -            | -          | -           | G3932     | Synthetic | -           | -                           | 205448                    | -        | -        | 40.95      | 86.15      |
| China   | Asia      | -            | -          | -           | G3933     | Synthetic | -           | -                           | 12969                     | -        | -        | 40.95      | 101.25     |
| China   | Asia      | -            | -          | -           | G3934     | Synthetic | -           | -                           | 15487                     | -        | -        | 40.95      | 101.35     |
| China   | Asia      | -            | -          | -           | G3935     | Synthetic | -           | -                           | 14140                     | -        | -        | 40.95      | 122.45     |
| China   | Asia      | -            | -          | -           | G3938     | Synthetic | -           | -                           | 15857                     | -        | -        | 40.85      | 125.55     |
| China   | Asia      | -            | -          | -           | G3945     | Synthetic | -           | -                           | 26655                     | -        | -        | 40.75      | 108.65     |
| China   | Asia      | -            | -          | -           | G3947     | Synthetic | -           | -                           | 325744                    | -        | -        | 40.65      | 108.55     |
| China   | Asia      | -            | -          | -           | G3948     | Synthetic | -           | -                           | 45996                     | -        | -        | 40.55      | 80.65      |
| China   | Asia      | -            | -          | -           | G3949     | Synthetic | -           | -                           | 13580                     | -        | -        | 40.55      | 83.35      |
| China   | Asia      | -            | -          | -           | G3950     | Synthetic | -           | -                           | 34912                     | -        | -        | 40.55      | 94.45      |
| China   | Asia      | -            | -          | -           | G3956     | Synthetic | -           | -                           | 281189                    | -        | -        | 40.45      | 80.85      |
| China   | Asia      | -            | -          | -           | G3957     | Synthetic | -           | -                           | 22823                     | -        | -        | 40.45      | 83.85      |
| China   | Asia      | -            | -          | -           | G3958     | Synthetic | -           | -                           | 85792                     | -        | -        | 40.45      | 84.15      |
| China   | Asia      | -            | -          | -           | G3959     | Synthetic | -           | -                           | 111746                    | -        | -        | 40.45      | 84.65      |
| China   | Asia      | -            | -          | -           | G3960     | Synthetic | -           | -                           | 33061                     | -        | -        | 40.45      | 94.45      |
| China   | Asia      | -            | -          | -           | G3961     | Synthetic | -           | -                           | 15614                     | -        | -        | 40.45      | 94.75      |
| China   | Asia      | -            | -          | -           | G3962     | Synthetic | -           | -                           | 14992                     | -        | -        | 40.45      | 115.25     |
| China   | Asia      | -            | -          | -           | G3965     | Synthetic | -           | -                           | 14300                     | -        | -        | 40.35      | 80.35      |
| China   | Asia      | -            | -          | -           | G3966     | Synthetic | -           | -                           | 77916                     | -        | -        | 40.35      | 80.85      |
| China   | Asia      | -            | -          | -           | G3967     | Synthetic | -           | -                           | 36909                     | -        | -        | 40.35      | 83.35      |
| China   | Asia      | -            | -          | -           | G3968     | Synthetic | -           | -                           | 62208                     | -        | -        | 40.35      | 83.85      |
| China   | Asia      | -            | -          | -           | G3969     | Synthetic | -           | -                           | 24426                     | -        | -        | 40.35      | 84.15      |
| China   | Asia      | -            | -          | -           | G3970     | Synthetic | -           | -                           | 59166                     | -        | -        | 40.35      | 84.65      |
| China   | Asia      | -            | -          | -           | G3971     | Synthetic | -           | -                           | 82155                     | -        | -        | 40.35      | 92.95      |
| China   | Asia      | -            | -          | -           | G3972     | Synthetic | -           | -                           | 16875                     | -        | -        | 40.35      | 94.65      |
| China   | Asia      | -            | -          | -           | G3973     | Synthetic | -           | -                           | 16520                     | -        | -        | 40.35      | 99.45      |
| China   | Asia      | -            | -          | -           | G3974     | Synthetic | -           | -                           | 17914                     | -        | -        | 40.35      | 111.15     |
| China   | Asia      | -            | -          | -           | G3975     | Synthetic | -           | -                           | 25829                     | -        | -        | 40.35      | 115.25     |
| China   | Asia      | -            | -          | -           | G3978     | Synthetic | -           | -                           | 199865                    | -        | -        | 40.25      | 80.35      |
| China   | Asia      | -            | -          | -           | G3979     | Synthetic | -           | -                           | 16073                     | -        | -        | 40.25      | 84.55      |
| China   | Asia      | -            | -          | -           | G3981     | Synthetic | -           | -                           | 13021                     | -        | -        | 40.25      | 90.65      |
| China   | Asia      | -            | -          | -           | G3982     | Synthetic | -           | -                           | 36321                     | -        | -        | 40.25      | 99.45      |
| China   | Asia      | -            | -          | -           | G3983     | Synthetic | -           | -                           | 372702                    | -        | -        | 40.25      | 111.05     |
| China   | Asia      | -            | -          | -           | G3986     | Synthetic | -           | -                           | 45489                     | -        | -        | 40.15      | 90.45      |
| China   | Asia      | -            | -          | -           | G3987     | Synthetic | -           | -                           | 30450                     | -        | -        | 40.15      | 90.65      |

| Country | Continent | Station Name | River Name | River Basin | GloFAS ID | Provider  | Provider ID | Catchment Area Provided km² | Catchment Area GloFAS km² | LAT Prov | LON Prov | LAT GloFAS | LON GloFAS |
|---------|-----------|--------------|------------|-------------|-----------|-----------|-------------|-----------------------------|---------------------------|----------|----------|------------|------------|
| China   | Asia      | -            | -          | -           | G3989     | Synthetic | -           | -                           | 789455                    | -        | -        | 40.05      | 90.35      |
| China   | Asia      | -            | -          | -           | G3990     | Synthetic | -           | -                           | 77868                     | -        | -        | 39.85      | 79.35      |
| China   | Asia      | -            | -          | -           | G3992     | Synthetic | -           | -                           | 9978                      | -        | -        | 39.75      | 77.95      |
| China   | Asia      | -            | -          | -           | G3993     | Synthetic | -           | -                           | 37018                     | -        | -        | 39.75      | 78.25      |
| China   | Asia      | -            | -          | -           | G3994     | Synthetic | -           | -                           | 115740                    | -        | -        | 39.75      | 79.35      |
| China   | Asia      | -            | -          | -           | G3998     | Synthetic | -           | -                           | 26751                     | -        | -        | 39.65      | 77.95      |
| China   | Asia      | -            | -          | -           | G3999     | Synthetic | -           | -                           | 37583                     | -        | -        | 39.65      | 78.25      |
| China   | Asia      | -            | -          | -           | G4000     | Synthetic | -           | -                           | 65114                     | -        | -        | 39.65      | 78.75      |
| China   | Asia      | -            | -          | -           | G4001     | Synthetic | -           | -                           | 90757                     | -        | -        | 39.65      | 78.85      |
| China   | Asia      | -            | -          | -           | G4005     | Synthetic | -           | -                           | 25546                     | -        | -        | 39.55      | 78.85      |
| China   | Asia      | -            | -          | -           | G4006     | Synthetic | -           | -                           | 22566                     | -        | -        | 39.55      | 78.95      |
| China   | Asia      | -            | -          | -           | G4007     | Synthetic | -           | -                           | 681476                    | -        | -        | 39.55      | 88.45      |
| China   | Asia      | -            | -          | -           | G4011     | Synthetic | -           | -                           | 54072                     | -        | -        | 39.45      | 88.35      |
| China   | Asia      | -            | -          | -           | G4018     | Synthetic | -           | -                           | 23166                     | -        | -        | 39.35      | 88.45      |
| China   | Asia      | -            | -          | -           | G4019     | Synthetic | -           | -                           | 50700                     | -        | -        | 39.35      | 116.95     |
| China   | Asia      | -            | -          | -           | G4020     | Synthetic | -           | -                           | 21345                     | -        | -        | 39.35      | 117.05     |
| China   | Asia      | -            | -          | -           | G4023     | Synthetic | -           | -                           | 11734                     | -        | -        | 39.25      | 78.95      |
| China   | Asia      | -            | -          | -           | G4024     | Synthetic | -           | -                           | 72529                     | -        | -        | 39.25      | 117.05     |
| China   | Asia      | -            | -          | -           | G4030     | Synthetic | -           | -                           | 10155                     | -        | -        | 39.15      | 79.05      |
| China   | Asia      | -            | -          | -           | G4031     | Synthetic | -           | -                           | 140045                    | -        | -        | 39.15      | 117.05     |
| China   | Asia      | -            | -          | -           | G4036     | Synthetic | -           | -                           | 31538                     | -        | -        | 39.05      | 116.75     |
| China   | Asia      | -            | -          | -           | G4042     | Synthetic | -           | -                           | 10575                     | -        | -        | 38.95      | 100.35     |
| China   | Asia      | -            | -          | -           | G4043     | Synthetic | -           | -                           | 59305                     | -        | -        | 38.95      | 116.75     |
| China   | Asia      | -            | -          | -           | G4044     | Synthetic | -           | -                           | 48619                     | -        | -        | 38.95      | 116.85     |
| China   | Asia      | -            | -          | -           | G4047     | Synthetic | -           | -                           | 19558                     | -        | -        | 38.85      | 116.15     |
| China   | Asia      | -            | -          | -           | G4054     | Synthetic | -           | -                           | 49002                     | -        | -        | 38.75      | 77.45      |
| China   | Asia      | -            | -          | -           | G4055     | Synthetic | -           | -                           | 13304                     | -        | -        | 38.75      | 77.55      |
| China   | Asia      | -            | -          | -           | G4071     | Synthetic | -           | -                           | 28104                     | -        | -        | 38.25      | 115.95     |
| China   | Asia      | -            | -          | -           | G4074     | Synthetic | -           | -                           | 16106                     | -        | -        | 38.15      | 80.65      |
| China   | Asia      | -            | -          | -           | G4075     | Synthetic | -           | -                           | 25826                     | -        | -        | 38.15      | 116.05     |
| China   | Asia      | -            | -          | -           | G4078     | Synthetic | -           | -                           | 23553                     | -        | -        | 38.05      | 80.45      |
| China   | Asia      | -            | -          | -           | G4080     | Synthetic | -           | -                           | 18735                     | -        | -        | 37.95      | 80.45      |
| China   | Asia      | -            | -          | -           | G4086     | Synthetic | -           | -                           | 11780                     | -        | -        | 37.85      | 76.05      |
| China   | Asia      | -            | -          | -           | G4087     | Synthetic | -           | -                           | 29639                     | -        | -        | 37.75      | 76.15      |
| China   | Asia      | -            | -          | -           | G4096     | Synthetic | -           | -                           | 14324                     | -        | -        | 37.35      | 105.65     |
| China   | Asia      | -            | -          | -           | G4106     | Synthetic | -           | -                           | 10157                     | -        | -        | 37.15      | 93.15      |
| China   | Asia      | -            | -          | -           | G4107     | Synthetic | -           | -                           | 37014                     | -        | -        | 37.15      | 110.45     |
| China   | Asia      | -            | -          | -           | G4108     | Synthetic | -           | -                           | 445865                    | -        | -        | 37.15      | 110.55     |
| China   | Asia      | -            | -          | -           | G4114     | Synthetic | -           | -                           | 22518                     | -        | -        | 37.05      | 93.15      |

| Country | Continent | Station Name | River Name | River Basin | GloFAS ID | Provider  | Provider ID | Catchment Area Provided km² | Catchment Area GloFAS km² | LAT Prov | LON Prov | LAT GloFAS | LON GloFAS |
|---------|-----------|--------------|------------|-------------|-----------|-----------|-------------|-----------------------------|---------------------------|----------|----------|------------|------------|
| China   | Asia      | -            | -          | -           | G4117     | Synthetic | -           | -                           | 21571                     | -        | -        | 36.85      | 95.15      |
| China   | Asia      | -            | -          | -           | G4118     | Synthetic | -           | -                           | 60754                     | -        | -        | 36.85      | 95.25      |
| China   | Asia      | -            | -          | -           | G4124     | Synthetic | -           | -                           | 10714                     | -        | -        | 36.65      | 96.55      |
| China   | Asia      | -            | -          | -           | G4129     | Synthetic | -           | -                           | 29848                     | -        | -        | 36.55      | 96.55      |
| China   | Asia      | -            | -          | -           | G4130     | Synthetic | -           | -                           | 233745                    | -        | -        | 36.45      | 104.55     |
| China   | Asia      | -            | -          | -           | G4131     | Synthetic | -           | -                           | 10816                     | -        | -        | 36.45      | 104.65     |
| China   | Asia      | -            | -          | -           | G4132     | Synthetic | -           | -                           | 19941                     | -        | -        | 36.35      | 115.15     |
| China   | Asia      | -            | -          | -           | G4136     | Synthetic | -           | -                           | 14291                     | -        | -        | 36.25      | 115.25     |
| China   | Asia      | -            | -          | -           | G4139     | Synthetic | -           | -                           | 32981                     | -        | -        | 36.15      | 103.25     |
| China   | Asia      | -            | -          | -           | G4144     | Synthetic | -           | -                           | 185609                    | -        | -        | 36.05      | 103.25     |
| China   | Asia      | -            | -          | -           | G4156     | Synthetic | -           | -                           | 24987                     | -        | -        | 35.85      | 103.45     |
| China   | Asia      | -            | -          | -           | G4162     | Synthetic | -           | -                           | 19394                     | -        | -        | 35.35      | 107.85     |
| China   | Asia      | -            | -          | -           | G4168     | Synthetic | -           | -                           | 14490                     | -        | -        | 35.25      | 107.85     |
| China   | Asia      | -            | -          | -           | G4174     | Synthetic | -           | -                           | 14062                     | -        | -        | 35.05      | 113.35     |
| China   | Asia      | -            | -          | -           | G4180     | Synthetic | -           | -                           | 706121                    | -        | -        | 34.85      | 112.95     |
| China   | Asia      | -            | -          | -           | G4182     | Synthetic | -           | -                           | 21610                     | -        | -        | 34.75      | 94.95      |
| China   | Asia      | -            | -          | -           | G4183     | Synthetic | -           | -                           | 12792                     | -        | -        | 34.75      | 105.55     |
| China   | Asia      | -            | -          | -           | G4184     | Synthetic | -           | -                           | 11084                     | -        | -        | 34.75      | 105.65     |
| China   | Asia      | -            | -          | -           | G4185     | Synthetic | -           | -                           | 27437                     | -        | -        | 34.75      | 110.15     |
| China   | Asia      | -            | -          | -           | G4186     | Synthetic | -           | -                           | 554653                    | -        | -        | 34.75      | 110.25     |
| China   | Asia      | -            | -          | -           | G4193     | Synthetic | -           | -                           | 109186                    | -        | -        | 34.65      | 110.05     |
| China   | Asia      | -            | -          | -           | G4194     | Synthetic | -           | -                           | 136931                    | -        | -        | 34.65      | 110.15     |
| China   | Asia      | -            | -          | -           | G4203     | Synthetic | -           | -                           | 46042                     | -        | -        | 34.45      | 108.85     |
| China   | Asia      | -            | -          | -           | G4205     | Synthetic | -           | -                           | 49699                     | -        | -        | 34.35      | 108.85     |
| China   | Asia      | -            | -          | -           | G4211     | Synthetic | -           | -                           | 12908                     | -        | -        | 34.25      | 118.15     |
| China   | Asia      | -            | -          | -           | G4218     | Synthetic | -           | -                           | 17313                     | -        | -        | 34.15      | 92.65      |
| China   | Asia      | -            | -          | -           | G4227     | Synthetic | -           | -                           | 14975                     | -        | -        | 33.95      | 92.65      |
| China   | Asia      | -            | -          | -           | G4228     | Synthetic | -           | -                           | 16406                     | -        | -        | 33.95      | 92.75      |
| China   | Asia      | -            | -          | -           | G4246     | Synthetic | -           | -                           | 13060                     | -        | -        | 33.15      | 117.85     |
| China   | Asia      | -            | -          | -           | G4247     | Synthetic | -           | -                           | 155592                    | -        | -        | 33.15      | 118.65     |
| China   | Asia      | -            | -          | -           | G4249     | Synthetic | -           | -                           | 126281                    | -        | -        | 33.05      | 117.85     |
| China   | Asia      | -            | -          | -           | G4252     | Synthetic | -           | -                           | 22139                     | -        | -        | 32.95      | 117.05     |
| China   | Asia      | -            | -          | -           | G4254     | Synthetic | -           | -                           | 61739                     | -        | -        | 32.85      | 110.55     |
| China   | Asia      | -            | -          | -           | G4255     | Synthetic | -           | -                           | 99959                     | -        | -        | 32.85      | 117.15     |
| China   | Asia      | -            | -          | -           | G4261     | Synthetic | -           | -                           | 12667                     | -        | -        | 32.65      | 110.55     |
| China   | Asia      | -            | -          | -           | G4262     | Synthetic | -           | -                           | 17152                     | -        | -        | 32.65      | 111.55     |
| China   | Asia      | -            | -          | -           | G4267     | Synthetic | -           | -                           | 79024                     | -        | -        | 32.55      | 111.35     |
| China   | Asia      | -            | -          | -           | G4268     | Synthetic | -           | -                           | 13068                     | -        | -        | 32.55      | 115.35     |
| China   | Asia      | -            | -          | -           | G4269     | Synthetic | -           | -                           | 37820                     | -        | -        | 32.55      | 116.35     |

| Country | Continent | Station Name | River Name | River Basin | GloFAS ID | Provider  | Provider ID | Catchment Area Provided km² | Catchment Area GloFAS km² | LAT Prov | LON Prov | LAT GloFAS | LON GloFAS |
|---------|-----------|--------------|------------|-------------|-----------|-----------|-------------|-----------------------------|---------------------------|----------|----------|------------|------------|
| China   | Asia      | -            | -          | -           | G4272     | Synthetic | -           | -                           | 16136                     | -        | -        | 32.45      | 115.35     |
| China   | Asia      | -            | -          | -           | G4273     | Synthetic | -           | -                           | 44187                     | -        | -        | 32.45      | 116.35     |
| China   | Asia      | -            | -          | -           | G4275     | Synthetic | -           | -                           | 33008                     | -        | -        | 32.35      | 105.65     |
| China   | Asia      | -            | -          | -           | G4276     | Synthetic | -           | -                           | 28534                     | -        | -        | 32.35      | 105.75     |
| China   | Asia      | -            | -          | -           | G4277     | Synthetic | -           | -                           | 174504                    | -        | -        | 32.35      | 119.75     |
| China   | Asia      | -            | -          | -           | G4279     | Synthetic | -           | -                           | 1751040                   | -        | -        | 32.25      | 119.75     |
| China   | Asia      | -            | -          | -           | G4284     | Synthetic | -           | -                           | 13041                     | -        | -        | 32.05      | 96.95      |
| China   | Asia      | -            | -          | -           | G4285     | Synthetic | -           | -                           | 107574                    | -        | -        | 32.05      | 112.15     |
| China   | Asia      | -            | -          | -           | G4286     | Synthetic | -           | -                           | 24403                     | -        | -        | 32.05      | 112.25     |
| China   | Asia      | -            | -          | -           | G4289     | Synthetic | -           | -                           | 18834                     | -        | -        | 31.95      | 96.85      |
| China   | Asia      | -            | -          | -           | G4290     | Synthetic | -           | -                           | 16242                     | -        | -        | 31.85      | 101.85     |
| China   | Asia      | -            | -          | -           | G4291     | Synthetic | -           | -                           | 23410                     | -        | -        | 31.85      | 101.95     |
| China   | Asia      | -            | -          | -           | G4296     | Synthetic | -           | -                           | 14022                     | -        | -        | 31.65      | 93.85      |
| China   | Asia      | -            | -          | -           | G4304     | Synthetic | -           | -                           | 28922                     | -        | -        | 31.45      | 93.85      |
| China   | Asia      | -            | -          | -           | G4311     | Synthetic | -           | -                           | 12213                     | -        | -        | 31.35      | 118.25     |
| China   | Asia      | -            | -          | -           | G4312     | Synthetic | -           | -                           | 1703320                   | -        | -        | 31.35      | 118.35     |
| China   | Asia      | -            | -          | -           | G4318     | Synthetic | -           | -                           | 36546                     | -        | -        | 31.25      | 97.15      |
| China   | Asia      | -            | -          | -           | G4322     | Synthetic | -           | -                           | 16992                     | -        | -        | 31.15      | 97.05      |
| China   | Asia      | -            | -          | -           | G4323     | Synthetic | -           | -                           | 19755                     | -        | -        | 31.15      | 107.15     |
| China   | Asia      | -            | -          | -           | G4331     | Synthetic | -           | -                           | 11376                     | -        | -        | 31.05      | 107.25     |
| China   | Asia      | -            | -          | -           | G4345     | Synthetic | -           | -                           | 19680                     | -        | -        | 30.75      | 113.85     |
| China   | Asia      | -            | -          | -           | G4351     | Synthetic | -           | -                           | 147199                    | -        | -        | 30.65      | 113.85     |
| China   | Asia      | -            | -          | -           | G4353     | Synthetic | -           | -                           | 992616                    | -        | -        | 30.55      | 111.35     |
| China   | Asia      | -            | -          | -           | G4354     | Synthetic | -           | -                           | 167415                    | -        | -        | 30.55      | 114.15     |
| China   | Asia      | -            | -          | -           | G4356     | Synthetic | -           | -                           | 16871                     | -        | -        | 30.45      | 111.35     |
| China   | Asia      | -            | -          | -           | G4357     | Synthetic | -           | -                           | 1307230                   | -        | -        | 30.45      | 114.15     |
| China   | Asia      | -            | -          | -           | G4359     | Synthetic | -           | -                           | 19057                     | -        | -        | 30.35      | 100.95     |
| China   | Asia      | -            | -          | -           | G4360     | Synthetic | -           | -                           | 13512                     | -        | -        | 30.15      | 95.05      |
| China   | Asia      | -            | -          | -           | G4361     | Synthetic | -           | -                           | 44506                     | -        | -        | 30.15      | 100.85     |
| China   | Asia      | -            | -          | -           | G4362     | Synthetic | -           | -                           | 12411                     | -        | -        | 30.05      | 95.15      |
| China   | Asia      | -            | -          | -           | G4363     | Synthetic | -           | -                           | 82888                     | -        | -        | 30.05      | 106.25     |
| China   | Asia      | -            | -          | -           | G4364     | Synthetic | -           | -                           | 39792                     | -        | -        | 30.05      | 106.35     |
| China   | Asia      | -            | -          | -           | G4368     | Synthetic | -           | -                           | 36508                     | -        | -        | 29.95      | 106.25     |
| China   | Asia      | -            | -          | -           | G4369     | Synthetic | -           | -                           | 207740                    | -        | -        | 29.85      | 95.05      |
| China   | Asia      | -            | -          | -           | G4372     | Synthetic | -           | -                           | 859627                    | -        | -        | 29.75      | 107.25     |
| China   | Asia      | -            | -          | -           | G4374     | Synthetic | -           | -                           | 13900                     | -        | -        | 29.65      | 103.65     |
| China   | Asia      | -            | -          | -           | G4375     | Synthetic | -           | -                           | 33683                     | -        | -        | 29.65      | 103.75     |
| China   | Asia      | -            | -          | -           | G4376     | Synthetic | -           | -                           | 88204                     | -        | -        | 29.65      | 107.35     |
| China   | Asia      | -            | -          | -           | G4377     | Synthetic | -           | -                           | 17697                     | -        | -        | 29.55      | 94.45      |

| Country | Continent | Station Name | River Name | River Basin | GloFAS ID | Provider  | Provider ID | Catchment Area Provided km² | Catchment Area GloFAS km² | LAT Prov | LON Prov | LAT GloFAS | LON GloFAS |
|---------|-----------|--------------|------------|-------------|-----------|-----------|-------------|-----------------------------|---------------------------|----------|----------|------------|------------|
| China   | Asia      | -            | -          | -           | G4378     | Synthetic | -           | -                           | 78209                     | -        | -        | 29.55      | 103.65     |
| China   | Asia      | -            | -          | -           | G4379     | Synthetic | -           | -                           | 161348                    | -        | -        | 29.55      | 106.45     |
| China   | Asia      | -            | -          | -           | G4380     | Synthetic | -           | -                           | 11895                     | -        | -        | 29.55      | 119.45     |
| China   | Asia      | -            | -          | -           | G4386     | Synthetic | -           | -                           | 33021                     | -        | -        | 29.45      | 90.95      |
| China   | Asia      | -            | -          | -           | G4387     | Synthetic | -           | -                           | 686959                    | -        | -        | 29.45      | 106.45     |
| China   | Asia      | -            | -          | -           | G4388     | Synthetic | -           | -                           | 1023200                   | -        | -        | 29.45      | 113.05     |
| China   | Asia      | -            | -          | -           | G4389     | Synthetic | -           | -                           | 19062                     | -        | -        | 29.45      | 119.55     |
| China   | Asia      | -            | -          | -           | G4394     | Synthetic | -           | -                           | 82983                     | -        | -        | 29.35      | 88.75      |
| China   | Asia      | -            | -          | -           | G4395     | Synthetic | -           | -                           | 109614                    | -        | -        | 29.35      | 89.65      |
| China   | Asia      | -            | -          | -           | G4396     | Synthetic | -           | -                           | 187769                    | -        | -        | 29.35      | 94.35      |
| China   | Asia      | -            | -          | -           | G4400     | Synthetic | -           | -                           | 11671                     | -        | -        | 29.25      | 89.85      |
| China   | Asia      | -            | -          | -           | G4401     | Synthetic | -           | -                           | 126812                    | -        | -        | 29.25      | 90.75      |
| China   | Asia      | -            | -          | -           | G4406     | Synthetic | -           | -                           | 14702                     | -        | -        | 29.05      | 115.85     |
| China   | Asia      | -            | -          | -           | G4407     | Synthetic | -           | -                           | 84219                     | -        | -        | 29.05      | 115.95     |
| China   | Asia      | -            | -          | -           | G4410     | Synthetic | -           | -                           | 27792                     | -        | -        | 28.95      | 105.35     |
| China   | Asia      | -            | -          | -           | G4411     | Synthetic | -           | -                           | 26834                     | -        | -        | 28.95      | 112.35     |
| China   | Asia      | -            | -          | -           | G4412     | Synthetic | -           | -                           | 152836                    | -        | -        | 28.95      | 112.85     |
| China   | Asia      | -            | -          | -           | G4413     | Synthetic | -           | -                           | 102784                    | -        | -        | 28.95      | 112.95     |
| China   | Asia      | -            | -          | -           | G4417     | Synthetic | -           | -                           | 625889                    | -        | -        | 28.85      | 105.35     |
| China   | Asia      | -            | -          | -           | G4418     | Synthetic | -           | -                           | 654879                    | -        | -        | 28.85      | 105.75     |
| China   | Asia      | -            | -          | -           | G4420     | Synthetic | -           | -                           | 136884                    | -        | -        | 28.75      | 104.45     |
| China   | Asia      | -            | -          | -           | G4421     | Synthetic | -           | -                           | 17478                     | -        | -        | 28.75      | 105.75     |
| China   | Asia      | -            | -          | -           | G4422     | Synthetic | -           | -                           | 29573                     | -        | -        | 28.75      | 112.55     |
| China   | Asia      | -            | -          | -           | G4424     | Synthetic | -           | -                           | 461533                    | -        | -        | 28.65      | 104.35     |
| China   | Asia      | -            | -          | -           | G4426     | Synthetic | -           | -                           | 17754                     | -        | -        | 28.65      | 116.35     |
| China   | Asia      | -            | -          | -           | G4428     | Synthetic | -           | -                           | 14773                     | -        | -        | 28.55      | 104.35     |
| China   | Asia      | -            | -          | -           | G4429     | Synthetic | -           | -                           | 192172                    | -        | -        | 28.45      | 99.15      |
| China   | Asia      | -            | -          | -           | G4430     | Synthetic | -           | -                           | 12602                     | -        | -        | 28.45      | 99.25      |
| China   | Asia      | -            | -          | -           | G4431     | Synthetic | -           | -                           | 20058                     | -        | -        | 28.45      | 110.25     |
| China   | Asia      | -            | -          | -           | G4434     | Synthetic | -           | -                           | 60238                     | -        | -        | 28.35      | 110.25     |
| China   | Asia      | -            | -          | -           | G4443     | Synthetic | -           | -                           | 83154                     | -        | -        | 28.05      | 101.45     |
| China   | Asia      | -            | -          | -           | G4447     | Synthetic | -           | -                           | 19043                     | -        | -        | 27.95      | 101.55     |
| China   | Asia      | -            | -          | -           | G4451     | Synthetic | -           | -                           | 13323                     | -        | -        | 27.85      | 100.45     |
| China   | Asia      | -            | -          | -           | G4462     | Synthetic | -           | -                           | 221200                    | -        | -        | 27.65      | 100.25     |
| China   | Asia      | -            | -          | -           | G4466     | Synthetic | -           | -                           | 437417                    | -        | -        | 27.45      | 103.05     |
| China   | Asia      | -            | -          | -           | G4468     | Synthetic | -           | -                           | 12932                     | -        | -        | 27.35      | 103.15     |
| China   | Asia      | -            | -          | -           | G4488     | Synthetic | -           | -                           | 117588                    | -        | -        | 26.85      | 101.75     |
| China   | Asia      | -            | -          | -           | G4489     | Synthetic | -           | -                           | 38712                     | -        | -        | 26.85      | 112.65     |
| China   | Asia      | -            | -          | -           | G4490     | Synthetic | -           | -                           | 11291                     | -        | -        | 26.85      | 112.75     |



| Country | Continent | Station Name | River Name | River Basin | GloFAS ID | Provider  | Provider ID | Catchment Area Provided km² | Catchment Area GloFAS km² | LAT Prov | LON Prov | LAT GloFAS | LON GloFAS |
|---------|-----------|--------------|------------|-------------|-----------|-----------|-------------|-----------------------------|---------------------------|----------|----------|------------|------------|
| China   | Asia      | -            | -          | -           | G4493     | Synthetic | -           | -                           | 16667                     | -        | -        | 26.75      | 118.25     |
| China   | Asia      | -            | -          | -           | G4497     | Synthetic | -           | -                           | 129155                    | -        | -        | 26.65      | 101.85     |
| China   | Asia      | -            | -          | -           | G4498     | Synthetic | -           | -                           | 13528                     | -        | -        | 26.65      | 117.95     |
| China   | Asia      | -            | -          | -           | G4503     | Synthetic | -           | -                           | 260247                    | -        | -        | 26.55      | 101.65     |
| China   | Asia      | -            | -          | -           | G4504     | Synthetic | -           | -                           | 11838                     | -        | -        | 26.55      | 117.95     |
| China   | Asia      | -            | -          | -           | G4505     | Synthetic | -           | -                           | 25811                     | -        | -        | 26.55      | 118.05     |
| China   | Asia      | -            | -          | -           | G4515     | Synthetic | -           | -                           | 408312                    | -        | -        | 26.25      | 102.65     |
| China   | Asia      | -            | -          | -           | G4518     | Synthetic | -           | -                           | 12028                     | -        | -        | 26.15      | 102.75     |
| China   | Asia      | -            | -          | -           | G4570     | Synthetic | -           | -                           | 76374                     | -        | -        | 25.15      | 106.85     |
| China   | Asia      | -            | -          | -           | G4571     | Synthetic | -           | -                           | 25060                     | -        | -        | 24.95      | 106.05     |
| China   | Asia      | -            | -          | -           | G4572     | Synthetic | -           | -                           | 12205                     | -        | -        | 24.85      | 100.15     |
| China   | Asia      | -            | -          | -           | G4573     | Synthetic | -           | -                           | 47937                     | -        | -        | 24.85      | 106.15     |
| China   | Asia      | -            | -          | -           | G4574     | Synthetic | -           | -                           | 95581                     | -        | -        | 24.75      | 99.95      |
| China   | Asia      | -            | -          | -           | G4575     | Synthetic | -           | -                           | 26907                     | -        | -        | 24.65      | 109.25     |
| China   | Asia      | -            | -          | -           | G4579     | Synthetic | -           | -                           | 16568                     | -        | -        | 24.55      | 109.15     |
| China   | Asia      | -            | -          | -           | G4583     | Synthetic | -           | -                           | 14056                     | -        | -        | 24.45      | 116.45     |
| China   | Asia      | -            | -          | -           | G4600     | Synthetic | -           | -                           | 58518                     | -        | -        | 23.85      | 109.55     |
| China   | Asia      | -            | -          | -           | G4602     | Synthetic | -           | -                           | 121807                    | -        | -        | 23.75      | 109.45     |
| China   | Asia      | -            | -          | -           | G4607     | Synthetic | -           | -                           | 18756                     | -        | -        | 23.55      | 111.25     |
| China   | Asia      | -            | -          | -           | G4608     | Synthetic | -           | -                           | 11454                     | -        | -        | 23.55      | 111.55     |
| China   | Asia      | -            | -          | -           | G4610     | Synthetic | -           | -                           | 184197                    | -        | -        | 23.45      | 110.05     |
| China   | Asia      | -            | -          | -           | G4611     | Synthetic | -           | -                           | 293283                    | -        | -        | 23.45      | 111.15     |
| China   | Asia      | -            | -          | -           | G4612     | Synthetic | -           | -                           | 313181                    | -        | -        | 23.45      | 111.35     |
| China   | Asia      | -            | -          | -           | G4621     | Synthetic | -           | -                           | 40361                     | -        | -        | 23.25      | 112.85     |
| China   | Asia      | -            | -          | -           | G4625     | Synthetic | -           | -                           | 337686                    | -        | -        | 23.15      | 112.65     |
| China   | Asia      | -            | -          | -           | G4626     | Synthetic | -           | -                           | 38125                     | -        | -        | 22.95      | 108.05     |
| China   | Asia      | -            | -          | -           | G4630     | Synthetic | -           | -                           | 34122                     | -        | -        | 22.75      | 107.95     |
| India   | Asia      | -            | Ganges     | Ganges      | G1722     | DFO       | 51          | -                           | 933784                    | 24.974   | 87.975   | 24.95      | 87.95      |
| India   | Asia      | -            | Saptkosi   | Ganges      | G1723     | DFO       | 52          | -                           | 63514                     | 25.964   | 86.445   | 25.95      | 86.45      |
| India   | Asia      | -            | Ganges     | Ganges      | G1768     | DFO       | 193         | -                           | 936945                    | 24.614   | 88.065   | 24.65      | 88.05      |
| India   | Asia      | -            | Ganges     | Ganges      | G1769     | DFO       | 195         | -                           | 787040                    | 25.334   | 86.175   | 25.35      | 86.15      |
| India   | Asia      | -            | Gandak     | Ganges      | G1770     | DFO       | 198         | -                           | 39149                     | 26.774   | 84.375   | 26.75      | 84.35      |
| India   | Asia      | -            | Ghaghra    | Ganges      | G1771     | DFO       | 199         | -                           | 86132                     | 26.864   | 81.765   | 26.85      | 81.75      |
| India   | Asia      | -            | Ghaghra    | Ganges      | G1772     | DFO       | 200         | -                           | 80057                     | 27.494   | 81.315   | 27.45      | 81.35      |
| India   | Asia      | -            | Ghaghra    | Ganges      | G1773     | DFO       | 203         | -                           | 89014                     | 26.684   | 82.395   | 26.65      | 82.35      |
| India   | Asia      | -            | Ganges     | Ganges      | G1774     | DFO       | 205         | -                           | 461470                    | 25.244   | 82.395   | 25.25      | 82.35      |
| India   | Asia      | -            | Ramganga   | Ganges      | G1775     | DFO       | 208         | -                           | 27821                     | 29.204   | 78.075   | 29.25      | 78.05      |
| India   | Asia      | -            | Ramganga   | Ganges      | G1776     | DFO       | 210         | -                           | 20318                     | 28.034   | 79.515   | 28.05      | 79.45      |
| India   | Asia      | -            | Ganges     | Ganges      | G1777     | DFO       | 211         | -                           | 15316                     | 29.564   | 77.085   | 29.55      | 77.05      |

| Country | Continent | Station Name | River Name  | River Basin         | GloFAS ID | Provider  | Provider ID | Catchment Area Provided km² | Catchment Area GloFAS km² | LAT Prov | LON Prov | LAT GloFAS | LON GloFAS |
|---------|-----------|--------------|-------------|---------------------|-----------|-----------|-------------|-----------------------------|---------------------------|----------|----------|------------|------------|
| India   | Asia      | -            | Brahmaputra | Brahmaputra         | G1918     | DFO       | 1936        | -                           | 393796                    | 26.324   | 92.025   | 26.35      | 92.05      |
| India   | Asia      | -            | Brahmaputra | Brahmaputra         | G1919     | DFO       | 1937        | -                           | 313411                    | 27.134   | 94.545   | 27.15      | 94.55      |
| India   | Asia      | -            | Lohit       | Brahmaputra         | G1920     | DFO       | 1938        | -                           | 40920                     | 27.764   | 95.535   | 27.75      | 95.55      |
| India   | Asia      | Perur        | Godavari    | Godavari            | G1926     | WRIS      | -           | -                           | 271023                    | 18.547   | 80.384   | 18.55      | 80.35      |
| India   | Asia      | Bhadrachalam | Godavari    | Godavari            | G1927     | WRIS      | -           | -                           | 280817                    | 17.675   | 80.883   | 17.75      | 80.85      |
| India   | Asia      | Polavaram    | Godavari    | Godavari            | G1928     | WRIS      | -           | -                           | 311631                    | 17.242   | 81.648   | 17.15      | 81.65      |
| India   | Asia      | Vijayawada   | Krishna     | Krishna             | G1929     | WRIS      | -           | 251360                      | 257437                    | 16.521   | 80.588   | 16.55      | 80.35      |
| India   | Asia      | K Agharam    | Krishna     | Krishna             | G1930     | WRIS      | -           | -                           | 131081                    | 16.259   | 77.844   | 16.35      | 77.75      |
| India   | Asia      | -            | Son         | Ganges              | G1931     | DFO       | 2015        | -                           | 68262                     | 24.884   | 84.195   | 24.95      | 84.25      |
| India   | Asia      | -            | Hugli       | Ganges              | G1932     | DFO       | 2016        | -                           | 19522                     | 23.534   | 88.335   | 23.55      | 88.35      |
| India   | Asia      | Tikarapara   | Mahanadi    | Mahanadi            | G1934     | WRIS      | -           | 124450                      | 127207                    | 20.601   | 84.776   | 20.55      | 84.75      |
| India   | Asia      | Basantpur    | Mahanadi    | Mahanadi            | G1935     | WRIS      | -           | -                           | 60443                     | 21.722   | 82.789   | 21.65      | 82.85      |
| India   | Asia      | Pauni        | Wainganga   | Godavari            | G1936     | WRIS      | -           | -                           | 36946                     | 20.796   | 79.644   | 20.75      | 79.65      |
| India   | Asia      | -            | Wainganga   | Godavari            | G1937     | DFO       | 2035        | -                           | 21116                     | 21.194   | 79.695   | 21.15      | 79.65      |
| India   | Asia      | Tekra        | Pranhita    | Godavari            | G1938     | WRIS      | -           | -                           | 109587                    | 18.981   | 79.943   | 19.05      | 79.85      |
| India   | Asia      | Naidupet     | Swarnamukhi | East flowing rivers | G1939     | WRIS      | -           | -                           | 2775                      | 13.948   | 79.896   | 13.85      | 79.85      |
| India   | Asia      | Musiri       | Cauvery     | Cauvery             | G1940     | WRIS      | -           | 66243                       | 71409                     | 10.944   | 78.433   | 10.95      | 78.35      |
| India   | Asia      | -            | Cauvery     | Cauvery             | G1941     | DFO       | 2043        | -                           | 79572                     | 11.204   | 79.605   | 11.25      | 79.55      |
| India   | Asia      | -            | -           | -                   | G4317     | Synthetic | -           | -                           | 16599                     | -        | -        | 31.25      | 75.05      |
| India   | Asia      | -            | -           | -                   | G4321     | Synthetic | -           | -                           | 66736                     | -        | -        | 31.15      | 75.05      |
| India   | Asia      | -            | -           | -                   | G4384     | Synthetic | -           | -                           | 20481                     | -        | -        | 29.45      | 74.05      |
| India   | Asia      | -            | -           | -                   | G4392     | Synthetic | -           | -                           | 38285                     | -        | -        | 29.35      | 74.05      |
| India   | Asia      | -            | -           | -                   | G4423     | Synthetic | -           | -                           | 18512                     | -        | -        | 28.65      | 77.15      |
| India   | Asia      | -            | -           | -                   | G4450     | Synthetic | -           | -                           | 259903                    | -        | -        | 27.85      | 95.35      |
| India   | Asia      | Parigaun     | Mahakali    | Ganges              | G4455     | Red       | -           | -                           | 14793                     | 29.172   | 80.260   | 29.15      | 80.25      |
| India   | Asia      | -            | -           | -                   | G4472     | Synthetic | -           | -                           | 50077                     | -        | -        | 27.15      | 79.75      |
| India   | Asia      | -            | -           | -                   | G4474     | Synthetic | -           | -                           | 52736                     | -        | -        | 27.05      | 78.35      |
| India   | Asia      | -            | -           | -                   | G4481     | Synthetic | -           | -                           | 25558                     | -        | -        | 26.95      | 78.35      |
| India   | Asia      | -            | -           | -                   | G4483     | Synthetic | -           | -                           | 34280                     | -        | -        | 26.95      | 93.95      |
| India   | Asia      | -            | -           | -                   | G4487     | Synthetic | -           | -                           | 324187                    | -        | -        | 26.85      | 93.95      |
| India   | Asia      | -            | -           | -                   | G4492     | Synthetic | -           | -                           | 359021                    | -        | -        | 26.75      | 93.75      |
| India   | Asia      | -            | -           | -                   | G4494     | Synthetic | -           | -                           | 81942                     | -        | -        | 26.65      | 79.05      |
| India   | Asia      | -            | -           | -                   | G4495     | Synthetic | -           | -                           | 376638                    | -        | -        | 26.65      | 92.95      |
| India   | Asia      | -            | -           | -                   | G4496     | Synthetic | -           | -                           | 12619                     | -        | -        | 26.65      | 93.65      |
| India   | Asia      | Garudeshwar  | Narmada     | Narmada             | G4501     | WRIS      | -           | -                           | 88440                     | 21.886   | 73.645   | 21.85      | 73.65      |
| India   | Asia      | -            | -           | -                   | G4507     | Synthetic | -           | -                           | 21755                     | -        | -        | 26.45      | 79.15      |
| India   | Asia      | -            | -           | -                   | G4513     | Synthetic | -           | -                           | 98232                     | -        | -        | 26.25      | 83.55      |
| India   | Asia      | -            | -           | -                   | G4516     | Synthetic | -           | -                           | 423307                    | -        | -        | 26.15      | 90.85      |
| India   | Asia      | -            | -           | -                   | G4517     | Synthetic | -           | -                           | 19812                     | -        | -        | 26.15      | 91.95      |

| Country | Continent | Station Name    | River Name  | River Basin         | GloFAS ID | Provider  | Provider ID | Catchment Area Provided km² | Catchment Area GloFAS km² | LAT Prov | LON Prov | LAT GloFAS | LON GloFAS |
|---------|-----------|-----------------|-------------|---------------------|-----------|-----------|-------------|-----------------------------|---------------------------|----------|----------|------------|------------|
| India   | Asia      | -               | -           | -                   | G4522     | Synthetic | -           | -                           | 47938                     | -        | -        | 26.05      | 76.65      |
| India   | Asia      | -               | -           | -                   | G4526     | Synthetic | -           | -                           | 256102                    | -        | -        | 25.95      | 80.05      |
| India   | Asia      | -               | -           | -                   | G4529     | Synthetic | -           | -                           | 61613                     | -        | -        | 25.85      | 76.45      |
| India   | Asia      | Gandhav         | Luni        | West flowing rivers | G4530     | WRIS      | -           | -                           | 55038                     | 24.989   | 71.682   | 24.95      | 71.65      |
| India   | Asia      | -               | -           | -                   | G4531     | Synthetic | -           | -                           | 43890                     | -        | -        | 25.85      | 80.05      |
| India   | Asia      | -               | -           | -                   | G4532     | Synthetic | -           | -                           | 307765                    | -        | -        | 25.85      | 80.45      |
| India   | Asia      | -               | -           | -                   | G4533     | Synthetic | -           | -                           | 132299                    | -        | -        | 25.85      | 84.55      |
| India   | Asia      | -               | -           | -                   | G4538     | Synthetic | -           | -                           | 15282                     | -        | -        | 25.75      | 76.55      |
| India   | Asia      | Rajghat         | Narmada     | Narmada             | G4539     | WRIS      | -           | 16540                       | 79108                     | 22.079   | 74.885   | 22.05      | 74.95      |
| India   | Asia      | Wadenapalli     | Krishna     | Krishna             | G4540     | WRIS      | -           | -                           | 245220                    | 16.789   | 80.131   | 16.85      | 80.15      |
| India   | Asia      | Khanpur         | Mahi        | Mahi                | G4542     | WRIS      | -           | -                           | 33541                     | 22.533   | 73.138   | 22.45      | 73.05      |
| India   | Asia      | -               | -           | -                   | G4548     | Synthetic | -           | -                           | 11367                     | -        | -        | 25.65      | 82.65      |
| India   | Asia      | -               | -           | -                   | G4549     | Synthetic | -           | -                           | 525439                    | -        | -        | 25.65      | 84.55      |
| India   | Asia      | -               | -           | -                   | G4551     | Synthetic | -           | -                           | 731715                    | -        | -        | 25.65      | 85.05      |
| India   | Asia      | Mantralayam     | Tungabhadra | Krishna             | G4555     | WRIS      | -           | -                           | 65120                     | 15.948   | 77.430   | 15.95      | 77.55      |
| India   | Asia      | -               | -           | -                   | G4558     | Synthetic | -           | -                           | 29228                     | -        | -        | 25.45      | 76.15      |
| India   | Asia      | Savkheda        | Tapi        | Tapi                | G4559     | WRIS      | -           | -                           | 44561                     | 21.149   | 75.231   | 21.15      | 75.15      |
| India   | Asia      | -               | -           | -                   | G4560     | Synthetic | -           | -                           | 93260                     | -        | -        | 25.45      | 81.75      |
| India   | Asia      | -               | -           | -                   | G4561     | Synthetic | -           | -                           | 13351                     | -        | -        | 25.45      | 86.45      |
| India   | Asia      | -               | -           | -                   | G4562     | Synthetic | -           | -                           | 89133                     | -        | -        | 25.45      | 87.15      |
| India   | Asia      | -               | -           | -                   | G4563     | Synthetic | -           | -                           | 349242                    | -        | -        | 25.35      | 81.75      |
| India   | Asia      | -               | -           | -                   | G4564     | Synthetic | -           | -                           | 467990                    | -        | -        | 25.35      | 83.15      |
| India   | Asia      | -               | -           | -                   | G4565     | Synthetic | -           | -                           | 826902                    | -        | -        | 25.35      | 87.25      |
| India   | Asia      | Kodumudi        | Cauvery     | Cauvery             | G4567     | WRIS      | -           | 53233                       | 53126                     | 11.084   | 77.888   | 11.15      | 77.85      |
| India   | Asia      | -               | -           | -                   | G4568     | Synthetic | -           | -                           | 17169                     | -        | -        | 25.15      | 82.05      |
| India   | Asia      | -               | -           | -                   | G4576     | Synthetic | -           | -                           | 31868                     | -        | -        | 24.55      | 82.85      |
| India   | Asia      | Nalammaranpatti | Amaravathi  | Cauvery             | G4577     | WRIS      | -           | -                           | 9272                      | 10.881   | 77.984   | 10.85      | 77.95      |
| India   | Asia      | -               | -           | -                   | G4581     | Synthetic | -           | -                           | 13676                     | -        | -        | 24.45      | 82.95      |
| India   | Asia      | -               | -           | -                   | G4582     | Synthetic | -           | -                           | 11598                     | -        | -        | 24.45      | 83.85      |
| India   | Asia      | -               | -           | -                   | G4594     | Synthetic | -           | -                           | 204820                    | -        | -        | 24.05      | 69.05      |
| India   | Asia      | -               | -           | -                   | G4596     | Synthetic | -           | -                           | 106490                    | -        | -        | 23.95      | 69.05      |
| India   | Asia      | -               | -           | -                   | G4632     | Synthetic | -           | -                           | 23323                     | -        | -        | 22.65      | 87.85      |
| India   | Asia      | Bamnidihi       | Hasdeo      | Mahanadi            | G4658     | WRIS      | -           | 46020                       | 10317                     | 21.897   | 82.714   | 21.85      | 82.75      |
| India   | Asia      | Rajim           | Mahanadi    | Mahanadi            | G4662     | WRIS      | -           | -                           | 8734                      | 20.975   | 81.877   | 20.95      | 81.85      |
| India   | Asia      | Urachikottai    | Cauvery     | Cauvery             | G4663     | WRIS      | -           | -                           | 45217                     | 11.478   | 77.700   | 11.55      | 77.75      |
| India   | Asia      | -               | -           | -                   | G4664     | Synthetic | -           | -                           | 12428                     | -        | -        | 21.55      | 83.95      |
| India   | Asia      | Sarangkheda     | Tapi        | Tapi                | G4685     | WRIS      | -           | -                           | 55691                     | 21.427   | 74.530   | 21.45      | 74.55      |
| India   | Asia      | Salebhata       | Ong         | Mahanadi            | G4688     | WRIS      | -           | -                           | 4755                      | 20.978   | 83.551   | 20.95      | 83.65      |
| India   | Asia      | Kantamal        |             | Mahanadi            | G4692     | WRIS      | -           | -                           | 20303                     | 20.652   | 83.723   | 20.65      | 83.75      |

| Country   | Continent | Station Name          | River Name          | River Basin    | GloFAS ID | Provider  | Provider ID | Catchment Area Provided km² | Catchment Area GloFAS km² | LAT Prov | LON Prov | LAT GloFAS | LON GloFAS |
|-----------|-----------|-----------------------|---------------------|----------------|-----------|-----------|-------------|-----------------------------|---------------------------|----------|----------|------------|------------|
| India     | Asia      | Jenapur               | Brahmani            | Brahmani and   | G4693     | WRIS      | -           | 33955                       | 36863                     | 20.884   | 86.016   | 20.85      | 86.05      |
| India     | Asia      | Ghugus                | Wardha              | Godavari       | G4711     | WRIS      | -           | -                           | 20211                     | 19.934   | 79.088   | 19.95      | 79.05      |
| India     | Asia      | P G Penganga Bridge   | Penganga            | Godavari       | G4716     | WRIS      | -           | -                           | 20675                     | 19.816   | 78.574   | 19.75      | 78.45      |
| India     | Asia      | Ashti                 | Wainganga           | Godavari       | G4724     | WRIS      | -           | 50990                       | 52666                     | 19.684   | 79.786   | 19.65      | 79.75      |
| India     | Asia      | Sirpur                | Wardha              | Godavari       | G4725     | WRIS      | -           | -                           | 48599                     | 19.549   | 79.545   | 19.55      | 79.55      |
| India     | Asia      | Purna                 | Purna               | Godavari       | G4739     | WRIS      | -           | -                           | 15779                     | 19.179   | 77.013   | 19.15      | 77.05      |
| India     | Asia      | G R Bridge            | Godavari            | Godavari       | G4743     | WRIS      | -           | -                           | 35484                     | 19.020   | 76.726   | 19.05      | 76.95      |
| India     | Asia      | Mandleshwar           | Narmada             | Narmada        | G4750     | WRIS      | -           | -                           | 73122                     | 22.169   | 75.659   | 22.15      | 75.65      |
| India     | Asia      | Paleru Bridge         | Krishna/Paleru      | Krishna        | G4758     | WRIS      | -           | -                           | 2491                      | 16.951   | 80.048   | 16.95      | 80.05      |
| India     | Asia      | Chennur               | Pennar              | Pennar         | G4759     | WRIS      | -           | -                           | 39069                     | 14.567   | 78.800   | 14.55      | 78.85      |
| India     | Asia      | Pathagudem            | Godavari/Indravathi | Godavari       | G4760     | WRIS      | -           | 40000                       | 40422                     | 18.848   | 80.347   | 18.85      | 80.35      |
| India     | Asia      | Mancherial            | Godavari            | Godavari       | G4763     | WRIS      | -           | -                           | 102268                    | 18.833   | 79.448   | 18.85      | 79.45      |
| India     | Asia      | Somanpally            | Maner               | Godavari       | G4764     | WRIS      | -           | -                           | 13686                     | 18.619   | 79.807   | 18.65      | 79.85      |
| India     | Asia      | Konta                 | Sabari              | Godavari       | G4806     | WRIS      | -           | -                           | 20867                     | 17.820   | 81.389   | 17.85      | 81.35      |
| India     | Asia      | Kunavaram             | Godavari            | Godavari       | G4808     | WRIS      | -           | -                           | 286025                    | 17.571   | 81.252   | 17.55      | 81.15      |
| India     | Asia      | Takli                 | Bhima               | Krishna        | G4814     | WRIS      | -           | 33916                       | 33642                     | 17.414   | 75.845   | 17.45      | 75.85      |
| India     | Asia      | Wadakbal              | Sina                | Krishna        | G4815     | WRIS      | -           | -                           | 12380                     | 17.534   | 75.885   | 17.45      | 75.95      |
| India     | Asia      | Pondugala             | Krishna             | Krishna        | G4844     | WRIS      | -           | -                           | 240113                    | 16.684   | 79.659   | 16.65      | 79.65      |
| India     | Asia      | Yadgir                | Krishna             | Krishna        | G4847     | WRIS      | -           | 69863                       | 69982                     | 16.737   | 77.122   | 16.75      | 77.05      |
| India     | Asia      | Huvinhedgi            | Krishna             | Krishna        | G4855     | WRIS      | -           | -                           | 54905                     | 16.490   | 76.920   | 16.45      | 76.85      |
| India     | Asia      | Cholachguda           | Krishna/Malaprabha  | Krishna        | G4860     | WRIS      | -           | -                           | 10524                     | 15.870   | 75.725   | 15.85      | 75.75      |
| India     | Asia      | Ollenur               | Tungabhadra         | Krishna        | G4870     | WRIS      | -           | -                           | 33288                     | 15.491   | 76.718   | 15.45      | 76.75      |
| India     | Asia      | T Ramapuram           | Hagari              | Krishna        | G4871     | WRIS      | -           | -                           | 23350                     | 15.657   | 76.964   | 15.65      | 76.95      |
| Indonesia | Asia      | -                     | -                   | -              | G5240     | Synthetic | -           | -                           | 38712                     | -        | -        | -0.05      | 111.55     |
| Indonesia | Asia      | -                     | -                   | -              | G5245     | Synthetic | -           | -                           | 22744                     | -        | -        | -0.05      | 111.55     |
| Indonesia | Asia      | S CENRANAE            | Sungai              | -              | G5246     | Ind       | 4073001     | -                           | 1231                      | -3.9     | 120      | -3.85      | 119.95     |
| Indonesia | Asia      | -                     | Mahakam             | Sungai Mahakam | G5255     | Ind       | 3014000     | -                           | 39568                     | -        | 116.58   | -0.25      | 116.45     |
| Indonesia | Asia      | BATANG KUMPEH         | BATANG HARI         | Batang Hari    | G5309     | Ind       | 1071001     | -                           | 24329                     | -        | 102.82   | -1.65      | 102.95     |
| Indonesia | Asia      | BATANG HARI SEI DUREN | BATANG HARI         | Batang Hari    | G5322     | Ind       | 1071001     | -                           | 39876                     | -        | 103.52   | -1.55      | 103.45     |
| Indonesia | Asia      | CISADANE SERPONG      | CISADANE            | -              | G5365     | Ind       | 2010030     | -                           | 1833                      | -        | 106.64   | -6.35      | 106.65     |
| Indonesia | Asia      | SEI KAHAYAN           | SUNGAI KAHAYAN      | -              | G5366     | Ind       | 3029000     | -                           | 6918                      | -        | 113.94   | -2.05      | 113.95     |
| Indonesia | Asia      | SEI KAPUAS PUJON      | Barito              | -              | G5367     | Ind       | 3028000     | -                           | 30781                     | -        | 114.9    | -0.95      | 114.85     |
| Indonesia | Asia      | BATANG TAPUNG KIRI    | SUNGAI SIAK         | Batang Kuantan | G5372     | Ind       | 1060000     | -                           | 7168                      | -0.59    | 101.19   | -0.65      | 101.25     |
| Indonesia | Asia      | S BALIEM PIKHE        | S.BALIEM            | Mamberamo      | G5466     | Ind       | 5050000     | -                           | 5658                      | -        | 138.88   | -4.15      | 138.95     |
| Indonesia | Asia      | -                     | -                   | -              | G5467     | Synthetic | -           | -                           | 13861                     | -        | -        | -5.45      | 138.95     |
| Iran      | Asia      | -                     | -                   | -              | G4016     | Synthetic | -           | -                           | 14378                     | -        | -        | 39.35      | 47.45      |
| Iran      | Asia      | -                     | -                   | -              | G4120     | Synthetic | -           | -                           | 10869                     | -        | -        | 36.75      | 56.35      |
| Iran      | Asia      | -                     | -                   | -              | G4135     | Synthetic | -           | -                           | 26912                     | -        | -        | 36.25      | 56.55      |
| Iran      | Asia      | -                     | -                   | -              | G4138     | Synthetic | -           | -                           | 23540                     | -        | -        | 36.15      | 56.55      |

| Country | Continent | Station Name | River Name | River Basin | GloFAS ID | Provider  | Provider ID | Catchment Area Provided km² | Catchment Area GloFAS km² | LAT Prov | LON Prov | LAT GloFAS | LON GloFAS |
|---------|-----------|--------------|------------|-------------|-----------|-----------|-------------|-----------------------------|---------------------------|----------|----------|------------|------------|
| Iran    | Asia      | -            | -          | -           | G4148     | Synthetic | -           | -                           | 16797                     | -        | -        | 35.95      | 61.05      |
| Iran    | Asia      | -            | -          | -           | G4154     | Synthetic | -           | -                           | 54271                     | -        | -        | 35.85      | 61.25      |
| Iran    | Asia      | -            | -          | -           | G4166     | Synthetic | -           | -                           | 64953                     | -        | -        | 35.25      | 56.25      |
| Iran    | Asia      | -            | -          | -           | G4173     | Synthetic | -           | -                           | 17804                     | -        | -        | 35.05      | 56.35      |
| Iran    | Asia      | -            | -          | -           | G4176     | Synthetic | -           | -                           | 26818                     | -        | -        | 34.95      | 51.45      |
| Iran    | Asia      | -            | -          | -           | G4177     | Synthetic | -           | -                           | 24666                     | -        | -        | 34.85      | 50.85      |
| Iran    | Asia      | -            | -          | -           | G4178     | Synthetic | -           | -                           | 39266                     | -        | -        | 34.85      | 51.35      |
| Iran    | Asia      | -            | -          | -           | G4179     | Synthetic | -           | -                           | 19534                     | -        | -        | 34.85      | 57.95      |
| Iran    | Asia      | -            | -          | -           | G4188     | Synthetic | -           | -                           | 13883                     | -        | -        | 34.65      | 50.85      |
| Iran    | Asia      | -            | -          | -           | G4189     | Synthetic | -           | -                           | 23948                     | -        | -        | 34.65      | 53.45      |
| Iran    | Asia      | -            | -          | -           | G4190     | Synthetic | -           | -                           | 13114                     | -        | -        | 34.65      | 57.75      |
| Iran    | Asia      | -            | -          | -           | G4266     | Synthetic | -           | -                           | 10546                     | -        | -        | 32.55      | 52.15      |
| Iran    | Asia      | -            | -          | -           | G4271     | Synthetic | -           | -                           | 15677                     | -        | -        | 32.45      | 52.15      |
| Iran    | Asia      | -            | -          | -           | G4278     | Synthetic | -           | -                           | 31053                     | -        | -        | 32.25      | 52.85      |
| Iran    | Asia      | -            | -          | -           | G4292     | Synthetic | -           | -                           | 36859                     | -        | -        | 31.75      | 48.85      |
| Iran    | Asia      | -            | -          | -           | G4294     | Synthetic | -           | -                           | 23416                     | -        | -        | 31.65      | 48.75      |
| Iran    | Asia      | -            | -          | -           | G4295     | Synthetic | -           | -                           | 16477                     | -        | -        | 31.65      | 55.35      |
| Iran    | Asia      | -            | -          | -           | G4297     | Synthetic | -           | -                           | 26162                     | -        | -        | 31.55      | 55.25      |
| Iran    | Asia      | -            | -          | -           | G4298     | Synthetic | -           | -                           | 22565                     | -        | -        | 31.55      | 57.55      |
| Iran    | Asia      | -            | -          | -           | G4309     | Synthetic | -           | -                           | 190680                    | -        | -        | 31.35      | 61.65      |
| Iran    | Asia      | -            | -          | -           | G4339     | Synthetic | -           | -                           | 13012                     | -        | -        | 30.85      | 58.25      |
| Iran    | Asia      | -            | -          | -           | G4343     | Synthetic | -           | -                           | 49029                     | -        | -        | 30.75      | 58.25      |
| Iran    | Asia      | -            | -          | -           | G4355     | Synthetic | -           | -                           | 73598                     | -        | -        | 30.45      | 48.25      |
| Iran    | Asia      | -            | -          | -           | G4382     | Synthetic | -           | -                           | 36289                     | -        | -        | 29.45      | 59.25      |
| Iran    | Asia      | -            | -          | -           | G4465     | Synthetic | -           | -                           | 33334                     | -        | -        | 27.45      | 58.75      |
| Iran    | Asia      | -            | -          | -           | G4467     | Synthetic | -           | -                           | 21428                     | -        | -        | 27.35      | 58.95      |
| Iraq    | Asia      | -            | -          | -           | G4141     | Synthetic | -           | -                           | 57417                     | -        | -        | 36.05      | 43.25      |
| Iraq    | Asia      | -            | -          | -           | G4142     | Synthetic | -           | -                           | 27125                     | -        | -        | 36.05      | 43.45      |
| Iraq    | Asia      | -            | -          | -           | G4164     | Synthetic | -           | -                           | 89904                     | -        | -        | 35.25      | 43.35      |
| Iraq    | Asia      | -            | -          | -           | G4165     | Synthetic | -           | -                           | 19700                     | -        | -        | 35.25      | 43.45      |
| Iraq    | Asia      | -            | -          | -           | G4214     | Synthetic | -           | -                           | 12852                     | -        | -        | 34.15      | 44.35      |
| Iraq    | Asia      | -            | -          | -           | G4221     | Synthetic | -           | -                           | 249444                    | -        | -        | 34.05      | 42.45      |
| Iraq    | Asia      | -            | -          | -           | G4222     | Synthetic | -           | -                           | 117203                    | -        | -        | 34.05      | 44.15      |
| Iraq    | Asia      | -            | -          | -           | G4225     | Synthetic | -           | -                           | 18070                     | -        | -        | 33.95      | 42.45      |
| Iraq    | Asia      | -            | -          | -           | G4239     | Synthetic | -           | -                           | 279894                    | -        | -        | 33.45      | 43.45      |
| Iraq    | Asia      | -            | -          | -           | G4240     | Synthetic | -           | -                           | 27507                     | -        | -        | 33.55      | 43.55      |
| Iraq    | Asia      | -            | -          | -           | G4241     | Synthetic | -           | -                           | 136902                    | -        | -        | 33.35      | 44.35      |
| Iraq    | Asia      | -            | -          | -           | G4243     | Synthetic | -           | -                           | 33900                     | -        | -        | 33.25      | 44.55      |
| Iraq    | Asia      | -            | -          | -           | G4257     | Synthetic | -           | -                           | 69076                     | -        | -        | 32.65      | 44.15      |

| Country       | Continent | Station Name      | River Name    | River Basin   | GloFAS ID | Provider  | Provider ID | Catchment Area Provided km² | Catchment Area GloFAS km² | LAT Prov | LON Prov | LAT GloFAS | LON GloFAS |
|---------------|-----------|-------------------|---------------|---------------|-----------|-----------|-------------|-----------------------------|---------------------------|----------|----------|------------|------------|
| Iraq          | Asia      | -                 | -             | -             | G4258     | Synthetic | -           | -                           | 310848                    | -        | -        | 32.65      | 44.25      |
| Iraq          | Asia      | -                 | -             | -             | G4259     | Synthetic | -           | -                           | 22267                     | -        | -        | 32.65      | 45.95      |
| Iraq          | Asia      | -                 | -             | -             | G4264     | Synthetic | -           | -                           | 46023                     | -        | -        | 32.55      | 43.75      |
| Iraq          | Asia      | -                 | -             | -             | G4265     | Synthetic | -           | -                           | 175303                    | -        | -        | 32.55      | 45.95      |
| Iraq          | Asia      | -                 | -             | -             | G4293     | Synthetic | -           | -                           | 384457                    | -        | -        | 31.65      | 44.65      |
| Iraq          | Asia      | -                 | -             | -             | G4307     | Synthetic | -           | -                           | 12815                     | -        | -        | 31.35      | 42.05      |
| Iraq          | Asia      | -                 | -             | -             | G4308     | Synthetic | -           | -                           | 400393                    | -        | -        | 31.35      | 45.15      |
| Iraq          | Asia      | -                 | -             | -             | G4315     | Synthetic | -           | -                           | 48448                     | -        | -        | 31.25      | 47.55      |
| Iraq          | Asia      | -                 | -             | -             | G4327     | Synthetic | -           | -                           | 428788                    | -        | -        | 31.05      | 46.25      |
| Iraq          | Asia      | -                 | -             | -             | G4328     | Synthetic | -           | -                           | 18476                     | -        | -        | 31.05      | 46.35      |
| Iraq          | Asia      | -                 | -             | -             | G4329     | Synthetic | -           | -                           | 224734                    | -        | -        | 31.05      | 47.45      |
| Iraq          | Asia      | -                 | -             | -             | G4330     | Synthetic | -           | -                           | 273822                    | -        | -        | 31.05      | 47.55      |
| Iraq          | Asia      | -                 | -             | -             | G4332     | Synthetic | -           | -                           | 14880                     | -        | -        | 30.95      | 46.25      |
| Iraq          | Asia      | -                 | -             | -             | G4333     | Synthetic | -           | -                           | 471091                    | -        | -        | 30.95      | 47.35      |
| Iraq          | Asia      | -                 | -             | -             | G4348     | Synthetic | -           | -                           | 14977                     | -        | -        | 30.65      | 47.65      |
| Iraq          | Asia      | -                 | -             | -             | G4349     | Synthetic | -           | -                           | 747260                    | -        | -        | 30.65      | 47.75      |
| Iraq          | Asia      | -                 | -             | -             | G4358     | Synthetic | -           | -                           | 766310                    | -        | -        | 30.35      | 48.15      |
| Israel        | Asia      | Sede Nehemya      | Jordan        | -             | G0864     | GRDC      | 6594070     | -                           | 1865                      | 33.186   | 35.621   | 33.35      | 35.55      |
| Israel        | Asia      | Agan Naharayim    | Jordan        | Dead Sea      | G0875     | GRDC      | 6594080     | -                           | 10681                     | 32.633   | 35.583   | 32.65      | 35.55      |
| Jammu Kashmir | Asia      | -                 | -             | -             | G4143     | Synthetic | -           | -                           | 14050                     | -        | -        | 36.05      | 74.25      |
| Jammu Kashmir | Asia      | -                 | -             | -             | G4151     | Synthetic | -           | -                           | 12885                     | -        | -        | 35.95      | 74.25      |
| Jammu Kashmir | Asia      | -                 | -             | -             | G4155     | Synthetic | -           | -                           | 145988                    | -        | -        | 35.85      | 74.65      |
| Jammu Kashmir | Asia      | -                 | -             | -             | G4167     | Synthetic | -           | -                           | 62149                     | -        | -        | 35.25      | 75.95      |
| Jammu Kashmir | Asia      | -                 | -             | -             | G4171     | Synthetic | -           | -                           | 72079                     | -        | -        | 35.15      | 75.95      |
| Jammu Kashmir | Asia      | -                 | -             | -             | G4191     | Synthetic | -           | -                           | 10485                     | -        | -        | 34.65      | 76.15      |
| Jammu Kashmir | Asia      | -                 | -             | -             | G4192     | Synthetic | -           | -                           | 58936                     | -        | -        | 34.65      | 76.25      |
| Jammu Kashmir | Asia      | -                 | -             | -             | G4216     | Synthetic | -           | -                           | 38907                     | -        | -        | 34.15      | 77.35      |
| Jammu Kashmir | Asia      | -                 | -             | -             | G4217     | Synthetic | -           | -                           | 14343                     | -        | -        | 34.15      | 78.25      |
| Jammu Kashmir | Asia      | -                 | -             | -             | G4223     | Synthetic | -           | -                           | 14984                     | -        | -        | 34.05      | 77.15      |
| Jammu Kashmir | Asia      | -                 | -             | -             | G4224     | Synthetic | -           | -                           | 30428                     | -        | -        | 34.05      | 78.15      |
| Japan         | Asia      | Ishikari Ohashi   | Ishikari      | Ishikari      | G0651     | GRDC      | 2587100     | 12697                       | 13022                     | 43.119   | 141.54   | 43.15      | 141.55     |
| Japan         | Asia      | Fukawa Tone North | Tone          | Tone          | G0823     | GRDC      | 2588551     | 12458                       | 12851                     | 35.85    | 140.14   | 35.85      | 140.15     |
| Jordan        | Asia      | New Jerash Bridge | Nahr Az Zarqa | -             | G0881     | GRDC      | 6794255     | -                           | 3270                      | 32.2     | 35.87    | 32.15      | 35.85      |
| Kazakhstan    | Asia      | Kameny Kar Er     | Ishim         | Ob            | G0328     | GRDC      | 2911206     | 86200                       | 86773                     | 52.02    | 66.28    | 52.15      | 66.25      |
| Kazakhstan    | Asia      | Semiyarskoje      | Irtys         | Ob            | G0360     | GRDC      | 2911104     | 230000                      | 230807                    | 50.88    | 78.32    | 50.65      | 79.15      |
| Kazakhstan    | Asia      | Kushum            | Ural          | Ural          | G0364     | GRDC      | 2919200     | 190000                      | 190125                    | 50.85    | 51.28    | 51.15      | 51.35      |
| Kazakhstan    | Asia      | Buran             | Irtys         | Ob            | G0478     | GRDC      | 2911109     | 55900                       | 56226                     | 48       | 85.22    | 48.05      | 85.55      |
| Kazakhstan    | Asia      | Tyumen Aryk       | Syr Darya     | Aral Drainage | G0629     | GRDC      | 2916200     | 219000                      | 226899                    | 44.05    | 67.05    | 42.85      | 68.15      |
| Kazakhstan    | Asia      | -                 | Ishim         | Ob            | G1917     | DFO       | 1652        | -                           | 74180                     | 51.164   | 66.735   | 51.15      | 66.75      |

| Country    | Continent | Station Name | River Name | River Basin | GloFAS ID | Provider  | Provider ID | Catchment Area Provided km² | Catchment Area GloFAS km² | LAT Prov | LON Prov | LAT GloFAS | LON GloFAS |
|------------|-----------|--------------|------------|-------------|-----------|-----------|-------------|-----------------------------|---------------------------|----------|----------|------------|------------|
| Kazakhstan | Asia      | -            | -          | -           | G3299     | Synthetic | -           | -                           | 33054                     | -        | -        | 54.35      | 64.65      |
| Kazakhstan | Asia      | -            | -          | -           | G3305     | Synthetic | -           | -                           | 28536                     | -        | -        | 54.25      | 63.85      |
| Kazakhstan | Asia      | -            | -          | -           | G3307     | Synthetic | -           | -                           | 46475                     | -        | -        | 54.15      | 63.85      |
| Kazakhstan | Asia      | -            | -          | -           | G3323     | Synthetic | -           | -                           | 37567                     | -        | -        | 53.75      | 63.75      |
| Kazakhstan | Asia      | -            | -          | -           | G3367     | Synthetic | -           | -                           | 14477                     | -        | -        | 52.85      | 62.85      |
| Kazakhstan | Asia      | -            | -          | -           | G3375     | Synthetic | -           | -                           | 16544                     | -        | -        | 52.75      | 62.85      |
| Kazakhstan | Asia      | -            | -          | -           | G3432     | Synthetic | -           | -                           | 9086                      | -        | -        | 51.75      | 68.35      |
| Kazakhstan | Asia      | -            | -          | -           | G3433     | Synthetic | -           | -                           | 15814                     | -        | -        | 51.75      | 69.15      |
| Kazakhstan | Asia      | -            | -          | -           | G3442     | Synthetic | -           | -                           | 36072                     | -        | -        | 51.65      | 68.45      |
| Kazakhstan | Asia      | -            | -          | -           | G3443     | Synthetic | -           | -                           | 18055                     | -        | -        | 51.65      | 69.15      |
| Kazakhstan | Asia      | -            | -          | -           | G3458     | Synthetic | -           | -                           | 167423                    | -        | -        | 51.45      | 52.75      |
| Kazakhstan | Asia      | -            | -          | -           | G3459     | Synthetic | -           | -                           | 42197                     | -        | -        | 51.45      | 53.45      |
| Kazakhstan | Asia      | -            | -          | -           | G3465     | Synthetic | -           | -                           | 51526                     | -        | -        | 51.35      | 67.15      |
| Kazakhstan | Asia      | -            | -          | -           | G3475     | Synthetic | -           | -                           | 19946                     | -        | -        | 51.25      | 67.25      |
| Kazakhstan | Asia      | -            | -          | -           | G3508     | Synthetic | -           | -                           | 57953                     | -        | -        | 50.45      | 69.45      |
| Kazakhstan | Asia      | -            | -          | -           | G3514     | Synthetic | -           | -                           | 179629                    | -        | -        | 50.35      | 80.95      |
| Kazakhstan | Asia      | -            | -          | -           | G3515     | Synthetic | -           | -                           | 10041                     | -        | -        | 50.35      | 81.75      |
| Kazakhstan | Asia      | -            | -          | -           | G3527     | Synthetic | -           | -                           | 25899                     | -        | -        | 50.25      | 69.45      |
| Kazakhstan | Asia      | -            | -          | -           | G3528     | Synthetic | -           | -                           | 14564                     | -        | -        | 50.25      | 80.85      |
| Kazakhstan | Asia      | -            | -          | -           | G3529     | Synthetic | -           | -                           | 163499                    | -        | -        | 50.25      | 81.75      |
| Kazakhstan | Asia      | -            | -          | -           | G3536     | Synthetic | -           | -                           | 11345                     | -        | -        | 50.15      | 69.45      |
| Kazakhstan | Asia      | -            | -          | -           | G3537     | Synthetic | -           | -                           | 14472                     | -        | -        | 50.15      | 69.55      |
| Kazakhstan | Asia      | -            | -          | -           | G3546     | Synthetic | -           | -                           | 22477                     | -        | -        | 49.95      | 63.85      |
| Kazakhstan | Asia      | -            | -          | -           | G3548     | Synthetic | -           | -                           | 29449                     | -        | -        | 49.85      | 63.85      |
| Kazakhstan | Asia      | -            | -          | -           | G3549     | Synthetic | -           | -                           | 11794                     | -        | -        | 49.85      | 78.85      |
| Kazakhstan | Asia      | -            | -          | -           | G3550     | Synthetic | -           | -                           | 11877                     | -        | -        | 49.85      | 78.95      |
| Kazakhstan | Asia      | -            | -          | -           | G3565     | Synthetic | -           | -                           | 27813                     | -        | -        | 49.65      | 71.85      |
| Kazakhstan | Asia      | -            | -          | -           | G3572     | Synthetic | -           | -                           | 15299                     | -        | -        | 49.55      | 71.85      |
| Kazakhstan | Asia      | -            | -          | -           | G3580     | Synthetic | -           | -                           | 14110                     | -        | -        | 49.35      | 52.45      |
| Kazakhstan | Asia      | -            | -          | -           | G3591     | Synthetic | -           | -                           | 14186                     | -        | -        | 49.25      | 52.55      |
| Kazakhstan | Asia      | -            | -          | -           | G3609     | Synthetic | -           | -                           | 14118                     | -        | -        | 49.05      | 49.65      |
| Kazakhstan | Asia      | -            | -          | -           | G3610     | Synthetic | -           | -                           | 12848                     | -        | -        | 49.05      | 49.95      |
| Kazakhstan | Asia      | -            | -          | -           | G3611     | Synthetic | -           | -                           | 21472                     | -        | -        | 49.05      | 50.05      |
| Kazakhstan | Asia      | -            | -          | -           | G3617     | Synthetic | -           | -                           | 12422                     | -        | -        | 48.95      | 49.55      |
| Kazakhstan | Asia      | -            | -          | -           | G3618     | Synthetic | -           | -                           | 34486                     | -        | -        | 48.95      | 49.95      |
| Kazakhstan | Asia      | -            | -          | -           | G3623     | Synthetic | -           | -                           | 28621                     | -        | -        | 48.85      | 49.95      |
| Kazakhstan | Asia      | -            | -          | -           | G3634     | Synthetic | -           | -                           | 10210                     | -        | -        | 48.65      | 50.45      |
| Kazakhstan | Asia      | -            | -          | -           | G3637     | Synthetic | -           | -                           | 65442                     | -        | -        | 48.55      | 50.35      |
| Kazakhstan | Asia      | -            | -          | -           | G3638     | Synthetic | -           | -                           | 28444                     | -        | -        | 48.55      | 52.55      |

| Country    | Continent | Station Name | River Name | River Basin | GloFAS ID | Provider  | Provider ID | Catchment Area Provided km² | Catchment Area GloFAS km² | LAT Prov | LON Prov | LAT GloFAS | LON GloFAS |
|------------|-----------|--------------|------------|-------------|-----------|-----------|-------------|-----------------------------|---------------------------|----------|----------|------------|------------|
| Kazakhstan | Asia      | -            | -          | -           | G3639     | Synthetic | -           | -                           | 15137                     | -        | -        | 48.55      | 71.05      |
| Kazakhstan | Asia      | -            | -          | -           | G3645     | Synthetic | -           | -                           | 64228                     | -        | -        | 48.35      | 62.05      |
| Kazakhstan | Asia      | -            | -          | -           | G3651     | Synthetic | -           | -                           | 30321                     | -        | -        | 48.25      | 61.95      |
| Kazakhstan | Asia      | -            | -          | -           | G3661     | Synthetic | -           | -                           | 28328                     | -        | -        | 48.15      | 63.35      |
| Kazakhstan | Asia      | -            | -          | -           | G3667     | Synthetic | -           | -                           | 100195                    | -        | -        | 48.05      | 63.15      |
| Kazakhstan | Asia      | -            | -          | -           | G3674     | Synthetic | -           | -                           | 62010                     | -        | -        | 47.85      | 84.65      |
| Kazakhstan | Asia      | -            | -          | -           | G3690     | Synthetic | -           | -                           | 8656                      | -        | -        | 47.55      | 64.85      |
| Kazakhstan | Asia      | -            | -          | -           | G3696     | Synthetic | -           | -                           | 12648                     | -        | -        | 47.45      | 64.85      |
| Kazakhstan | Asia      | -            | -          | -           | G3697     | Synthetic | -           | -                           | 20291                     | -        | -        | 47.45      | 67.95      |
| Kazakhstan | Asia      | -            | -          | -           | G3698     | Synthetic | -           | -                           | 46361                     | -        | -        | 47.45      | 68.05      |
| Kazakhstan | Asia      | -            | -          | -           | G3709     | Synthetic | -           | -                           | 32396                     | -        | -        | 47.05      | 53.05      |
| Kazakhstan | Asia      | -            | -          | -           | G3714     | Synthetic | -           | -                           | 38408                     | -        | -        | 46.95      | 53.15      |
| Kazakhstan | Asia      | -            | -          | -           | G3719     | Synthetic | -           | -                           | 10116                     | -        | -        | 46.85      | 75.65      |
| Kazakhstan | Asia      | -            | -          | -           | G3726     | Synthetic | -           | -                           | 22513                     | -        | -        | 46.75      | 75.25      |
| Kazakhstan | Asia      | -            | -          | -           | G3727     | Synthetic | -           | -                           | 28177                     | -        | -        | 46.75      | 79.25      |
| Kazakhstan | Asia      | -            | -          | -           | G3733     | Synthetic | -           | -                           | 8706                      | -        | -        | 46.65      | 76.45      |
| Kazakhstan | Asia      | -            | -          | -           | G3743     | Synthetic | -           | -                           | 18659                     | -        | -        | 46.45      | 77.15      |
| Kazakhstan | Asia      | -            | -          | -           | G3775     | Synthetic | -           | -                           | 12204                     | -        | -        | 45.75      | 63.85      |
| Kazakhstan | Asia      | -            | -          | -           | G3783     | Synthetic | -           | -                           | 282416                    | -        | -        | 45.65      | 63.75      |
| Kazakhstan | Asia      | -            | -          | -           | G3798     | Synthetic | -           | -                           | 10816                     | -        | -        | 45.45      | 54.05      |
| Kazakhstan | Asia      | -            | -          | -           | G3799     | Synthetic | -           | -                           | 300891                    | -        | -        | 45.45      | 62.75      |
| Kazakhstan | Asia      | -            | -          | -           | G3808     | Synthetic | -           | -                           | 9003                      | -        | -        | 45.35      | 62.65      |
| Kazakhstan | Asia      | -            | -          | -           | G3816     | Synthetic | -           | -                           | 9303                      | -        | -        | 45.25      | 54.15      |
| Kazakhstan | Asia      | -            | -          | -           | G3840     | Synthetic | -           | -                           | 13559                     | -        | -        | 44.25      | 76.65      |
| Kazakhstan | Asia      | -            | -          | -           | G3841     | Synthetic | -           | -                           | 117139                    | -        | -        | 44.25      | 76.85      |
| Kazakhstan | Asia      | -            | -          | -           | G3845     | Synthetic | -           | -                           | 9948                      | -        | -        | 44.05      | 69.75      |
| Kazakhstan | Asia      | -            | -          | -           | G3848     | Synthetic | -           | -                           | 254093                    | -        | -        | 43.95      | 66.65      |
| Kazakhstan | Asia      | -            | -          | -           | G3849     | Synthetic | -           | -                           | 30452                     | -        | -        | 43.95      | 69.75      |
| Kazakhstan | Asia      | -            | -          | -           | G3852     | Synthetic | -           | -                           | 11841                     | -        | -        | 43.85      | 66.55      |
| Kazakhstan | Asia      | -            | -          | -           | G3853     | Synthetic | -           | -                           | 15836                     | -        | -        | 43.85      | 70.65      |
| Kazakhstan | Asia      | -            | -          | -           | G3854     | Synthetic | -           | -                           | 9820                      | -        | -        | 43.85      | 73.55      |
| Kazakhstan | Asia      | -            | -          | -           | G3855     | Synthetic | -           | -                           | 28362                     | -        | -        | 43.85      | 73.65      |
| Kazakhstan | Asia      | -            | -          | -           | G3859     | Synthetic | -           | -                           | 40657                     | -        | -        | 43.75      | 62.65      |
| Kazakhstan | Asia      | -            | -          | -           | G3860     | Synthetic | -           | -                           | 9628                      | -        | -        | 43.75      | 70.65      |
| Kazakhstan | Asia      | -            | -          | -           | G3879     | Synthetic | -           | -                           | 228828                    | -        | -        | 43.15      | 67.85      |
| Kazakhstan | Asia      | -            | -          | -           | G3880     | Synthetic | -           | -                           | 13346                     | -        | -        | 43.15      | 67.95      |
| Korea      | Asia      | Yeo Ju       | Han Gang   | Han Gang    | G0784     | GRDC      | 2677300     | 11104                       | 11738                     | 37.296   | 127.64   | 37.25      | 127.65     |
| Korea      | Asia      | Wae Gwan     | Naktong    | Naktong     | G0816     | GRDC      | 2694450     | 11074                       | 10936                     | 36.000   | 128.39   | 36.05      | 128.35     |
| Korea      | Asia      | -            | -          | -           | G3888     | Synthetic | -           | -                           | 11254                     | -        | -        | 42.85      | 129.85     |



| Country      | Continent | Station Name      | River Name    | River Basin  | GloFAS ID | Provider  | Provider ID | Catchment Area Provided km² | Catchment Area GloFAS km² | LAT Prov | LON Prov | LAT GloFAS | LON GloFAS |
|--------------|-----------|-------------------|---------------|--------------|-----------|-----------|-------------|-----------------------------|---------------------------|----------|----------|------------|------------|
| Korea        | Asia      | -                 | -             | -            | G3939     | Synthetic | -           | -                           | 33110                     | -        | -        | 40.85      | 125.75     |
| Korea        | Asia      | -                 | -             | -            | G4088     | Synthetic | -           | -                           | 10810                     | -        | -        | 37.65      | 127.35     |
| Korea        | Asia      | -                 | -             | -            | G4090     | Synthetic | -           | -                           | 13027                     | -        | -        | 37.55      | 127.35     |
| Kyrgyzstan   | Asia      | -                 | -             | -            | G3901     | Synthetic | -           | -                           | 9586                      | -        | -        | 41.75      | 73.95      |
| Kyrgyzstan   | Asia      | -                 | -             | -            | G3905     | Synthetic | -           | -                           | 34679                     | -        | -        | 41.65      | 73.85      |
| Kyrgyzstan   | Asia      | -                 | -             | -            | G3922     | Synthetic | -           | -                           | 58378                     | -        | -        | 41.05      | 71.95      |
| Kyrgyzstan   | Asia      | -                 | -             | -            | G3936     | Synthetic | -           | -                           | 95920                     | -        | -        | 40.85      | 71.15      |
| Lao People's | Asia      | Muong Ngoy        | Nam Ou        | Mekong       | G0937     | GRDC      | 2469060     | 19700                       | 19660                     | 20.701   | 102.75   | 20.75      | 102.65     |
| Lao People's | Asia      | Luang Prabang     | Mekong        | Mekong       | G0940     | GRDC      | 2469050     | 268000                      | 267333                    | 19.891   | 102.13   | 19.95      | 102.15     |
| Lao People's | Asia      | Ban Tha Lat       | Nam Ngum      | Mekong       | G0945     | GRDC      | 2469141     | 14200                       | 5171                      | 18.516   | 102.51   | 18.55      | 102.45     |
| Lao People's | Asia      | Ban Pak Kanhoung  | Nam Ngum      | Mekong       | G0946     | GRDC      | 2469058     | 14300                       | 14331                     | 18.418   | 102.55   | 18.35      | 102.55     |
| Lao People's | Asia      | Ban Phone Sy      | Nam Ca Dinh   | Mekong       | G0947     | GRDC      | 2469130     | 14200                       | 14267                     | 18.301   | 104.09   | 18.45      | 104.15     |
| Lao People's | Asia      | Tha Ngon          | Nam Ngum      | Mekong       | G0949     | GRDC      | 2469140     | 16500                       | 16456                     | 18.135   | 102.62   | 18.15      | 102.95     |
| Lao People's | Asia      | Near Vientiane    | Mekong        | Mekong       | G0952     | GRDC      | 2469072     | 299000                      | 298752                    | 17.928   | 102.62   | 17.85      | 101.65     |
| Lao People's | Asia      | Ban Keng Done     | Se Bang Hieng | Mekong       | G0967     | GRDC      | 2469120     | 19400                       | 19889                     | 16.185   | 105.31   | 16.15      | 105.35     |
| Lao People's | Asia      | Saravane          | Sedone        | Mekong       | G0973     | GRDC      | 2469269     | -                           | 1435                      | 15.716   | 106.4    | 15.75      | 106.35     |
| Lao People's | Asia      | Khong Sedone      | Sedone        | Mekong       | G0977     | GRDC      | 2469267     | -                           | 5501                      | 15.575   | 105.81   | 15.55      | 105.85     |
| Lao People's | Asia      | Pakse             | Mekong        | Mekong       | G0986     | GRDC      | 2469260     | 545000                      | 545489                    | 15.116   | 105.8    | 15.25      | 105.65     |
| Lao People's | Asia      | Attopeu Muong May | Se Kong       | Mekong       | G0989     | GRDC      | 2469300     | 10500                       | 10050                     | 14.806   | 106.84   | 14.85      | 106.75     |
| Lao People's | Asia      | -                 | Mekong        | Mekong       | G1779     | DFO       | 239         | -                           | 377916                    | 17.324   | 104.80   | 17.35      | 104.75     |
| Malaysia     | Asia      | Guillemard Bridge | Kelantan      | Kelantan     | G1105     | GRDC      | 5223100     | 11900                       | 11972                     | 5.77     | 102.15   | 5.55       | 102.15     |
| Malaysia     | Asia      | Balat Sabah       | Kinabatangan  | Kinabatangan | G1107     | GRDC      | 5231700     | 10800                       | 10368                     | 5.3      | 117.59   | 5.25       | 117.45     |
| Malaysia     | Asia      | Temerloh          | Pahang        | Pahang       | G1119     | GRDC      | 5224500     | 19000                       | 19769                     | 3.45     | 102.43   | 3.45       | 102.45     |
| Malaysia     | Asia      | Balaga            | Rajang        | Rajang       | G1125     | GRDC      | 5230500     | 18190                       | 18428                     | 2.7      | 113.77   | 2.65       | 113.75     |
| Malaysia     | Asia      | Ng Benin          | Rajang        | Rajang       | G1126     | GRDC      | 5230400     | 21192                       | 21026                     | 2.15     | 113.07   | 2.25       | 113.15     |
| Mongolia     | Asia      | -                 | -             | -            | G3517     | Synthetic | -           | -                           | 13526                     | -        | -        | 50.35      | 101.85     |
| Mongolia     | Asia      | -                 | -             | -            | G3531     | Synthetic | -           | -                           | 15987                     | -        | -        | 50.25      | 101.85     |
| Mongolia     | Asia      | -                 | -             | -            | G3532     | Synthetic | -           | -                           | 150938                    | -        | -        | 50.25      | 106.05     |
| Mongolia     | Asia      | -                 | -             | -            | G3540     | Synthetic | -           | -                           | 133564                    | -        | -        | 50.15      | 106.15     |
| Mongolia     | Asia      | -                 | -             | -            | G3551     | Synthetic | -           | -                           | 121777                    | -        | -        | 49.85      | 106.15     |
| Mongolia     | Asia      | -                 | -             | -            | G3552     | Synthetic | -           | -                           | 10812                     | -        | -        | 49.85      | 106.25     |
| Mongolia     | Asia      | -                 | -             | -            | G3573     | Synthetic | -           | -                           | 103093                    | -        | -        | 49.55      | 105.75     |
| Mongolia     | Asia      | -                 | -             | -            | G3574     | Synthetic | -           | -                           | 14828                     | -        | -        | 49.55      | 105.85     |
| Mongolia     | Asia      | -                 | -             | -            | G3576     | Synthetic | -           | -                           | 42280                     | -        | -        | 49.45      | 103.55     |
| Mongolia     | Asia      | -                 | -             | -            | G3581     | Synthetic | -           | -                           | 19850                     | -        | -        | 49.35      | 100.65     |
| Mongolia     | Asia      | -                 | -             | -            | G3582     | Synthetic | -           | -                           | 75792                     | -        | -        | 49.35      | 102.25     |
| Mongolia     | Asia      | -                 | -             | -            | G3583     | Synthetic | -           | -                           | 96886                     | -        | -        | 49.35      | 103.55     |
| Mongolia     | Asia      | -                 | -             | -            | G3592     | Synthetic | -           | -                           | 26873                     | -        | -        | 49.25      | 90.55      |
| Mongolia     | Asia      | -                 | -             | -            | G3593     | Synthetic | -           | -                           | 15982                     | -        | -        | 49.25      | 102.35     |

| Country  | Continent | Station Name | River Name | River Basin | GloFAS ID | Provider  | Provider ID | Catchment Area Provided km² | Catchment Area GloFAS km² | LAT Prov | LON Prov | LAT GloFAS | LON GloFAS |
|----------|-----------|--------------|------------|-------------|-----------|-----------|-------------|-----------------------------|---------------------------|----------|----------|------------|------------|
| Mongolia | Asia      | -            | -          | -           | G3602     | Synthetic | -           | -                           | 43689                     | -        | -        | 49.15      | 100.65     |
| Mongolia | Asia      | -            | -          | -           | G3603     | Synthetic | -           | -                           | 8992                      | -        | -        | 49.15      | 111.75     |
| Mongolia | Asia      | -            | -          | -           | G3612     | Synthetic | -           | -                           | 23632                     | -        | -        | 49.05      | 100.55     |
| Mongolia | Asia      | -            | -          | -           | G3613     | Synthetic | -           | -                           | 19726                     | -        | -        | 49.05      | 100.75     |
| Mongolia | Asia      | -            | -          | -           | G3619     | Synthetic | -           | -                           | 22710                     | -        | -        | 48.95      | 111.75     |
| Mongolia | Asia      | -            | -          | -           | G3624     | Synthetic | -           | -                           | 43770                     | -        | -        | 48.85      | 104.65     |
| Mongolia | Asia      | -            | -          | -           | G3625     | Synthetic | -           | -                           | 51216                     | -        | -        | 48.85      | 104.75     |
| Mongolia | Asia      | -            | -          | -           | G3652     | Synthetic | -           | -                           | 57923                     | -        | -        | 48.25      | 92.25      |
| Mongolia | Asia      | -            | -          | -           | G3653     | Synthetic | -           | -                           | 34418                     | -        | -        | 48.25      | 93.55      |
| Mongolia | Asia      | -            | -          | -           | G3662     | Synthetic | -           | -                           | 12255                     | -        | -        | 48.15      | 104.15     |
| Mongolia | Asia      | -            | -          | -           | G3668     | Synthetic | -           | -                           | 35364                     | -        | -        | 48.05      | 104.35     |
| Mongolia | Asia      | -            | -          | -           | G3680     | Synthetic | -           | -                           | 12956                     | -        | -        | 47.75      | 102.55     |
| Mongolia | Asia      | -            | -          | -           | G3686     | Synthetic | -           | -                           | 9624                      | -        | -        | 47.65      | 102.55     |
| Mongolia | Asia      | -            | -          | -           | G3691     | Synthetic | -           | -                           | 10694                     | -        | -        | 47.55      | 115.85     |
| Mongolia | Asia      | -            | -          | -           | G3692     | Synthetic | -           | -                           | 104431                    | -        | -        | 47.55      | 115.95     |
| Mongolia | Asia      | -            | -          | -           | G3700     | Synthetic | -           | -                           | 10355                     | -        | -        | 47.35      | 95.95      |
| Mongolia | Asia      | -            | -          | -           | G3704     | Synthetic | -           | -                           | 9236                      | -        | -        | 47.25      | 95.95      |
| Mongolia | Asia      | -            | -          | -           | G3706     | Synthetic | -           | -                           | 28434                     | -        | -        | 47.15      | 110.35     |
| Mongolia | Asia      | -            | -          | -           | G3707     | Synthetic | -           | -                           | 82019                     | -        | -        | 47.15      | 116.15     |
| Mongolia | Asia      | -            | -          | -           | G3710     | Synthetic | -           | -                           | 20275                     | -        | -        | 47.05      | 116.05     |
| Mongolia | Asia      | -            | -          | -           | G3784     | Synthetic | -           | -                           | 17853                     | -        | -        | 45.65      | 99.25      |
| Mongolia | Asia      | -            | -          | -           | G3791     | Synthetic | -           | -                           | 19484                     | -        | -        | 45.55      | 91.65      |
| Mongolia | Asia      | -            | -          | -           | G3842     | Synthetic | -           | -                           | 10824                     | -        | -        | 44.15      | 101.55     |
| Mongolia | Asia      | -            | -          | -           | G3843     | Synthetic | -           | -                           | 11442                     | -        | -        | 44.15      | 101.65     |
| Mongolia | Asia      | -            | -          | -           | G3865     | Synthetic | -           | -                           | 9593                      | -        | -        | 43.65      | 99.55      |
| Mongolia | Asia      | -            | -          | -           | G3895     | Synthetic | -           | -                           | 11742                     | -        | -        | 42.25      | 106.15     |
| Mongolia | Asia      | -            | -          | -           | G3896     | Synthetic | -           | -                           | 18361                     | -        | -        | 42.25      | 106.35     |
| Myanmar  | Asia      | Hkamti       | Chindwin   | Irrawaddy   | G0924     | GRDC      | 2260100     | 27420                       | 27506                     | 26       | 95.7     | 25.95      | 95.65      |
| Myanmar  | Asia      | Sagaing      | Irrawaddy  | Irrawaddy   | G0934     | GRDC      | 2260500     | 117900                      | 117961                    | 21.98    | 96.1     | 22.95      | 95.95      |
| Myanmar  | Asia      | Toungoo      | Sittang    | Sittanga    | G0942     | GRDC      | 2261500     | 14660                       | 14852                     | 18.92    | 96.47    | 19.05      | 96.45      |
| Myanmar  | Asia      | -            | Chindwin   | Irrawaddy   | G1712     | DFO       | 23          | -                           | 111300                    | 22.004   | 95.175   | 22.05      | 95.15      |
| Myanmar  | Asia      | -            | Chindwin   | Irrawaddy   | G1713     | DFO       | 24          | -                           | 55272                     | 24.794   | 94.905   | 24.75      | 94.95      |
| Myanmar  | Asia      | -            | Irrawaddy  | Irrawaddy   | G1714     | DFO       | 25          | -                           | 3551                      | 17.324   | 94.995   | 17.35      | 94.95      |
| Myanmar  | Asia      | -            | Irrawaddy  | Irrawaddy   | G1715     | DFO       | 26          | -                           | 80498                     | 24.344   | 96.615   | 24.35      | 96.65      |
| Myanmar  | Asia      | -            | Irrawaddy  | Irrawaddy   | G1716     | DFO       | 27          | -                           | 114762                    | 23.624   | 96.075   | 23.65      | 96.05      |
| Myanmar  | Asia      | -            | Irrawaddy  | Irrawaddy   | G1717     | DFO       | 29          | -                           | 329205                    | 20.564   | 94.815   | 20.55      | 94.75      |
| Myanmar  | Asia      | -            | Irrawaddy  | Irrawaddy   | G1718     | DFO       | 30          | -                           | 371791                    | 18.044   | 95.445   | 18.05      | 95.45      |
| Myanmar  | Asia      | -            | Chindwin   | Irrawaddy   | G1743     | DFO       | 108         | -                           | 60137                     | 24.254   | 94.815   | 24.25      | 94.75      |
| Myanmar  | Asia      | -            | -          | -           | G4543     | Synthetic | -           | -                           | 23429                     | -        | -        | 25.75      | 97.45      |

| Country | Continent | Station Name            | River Name   | River Basin | GloFAS ID | Provider  | Provider ID | Catchment Area Provided km² | Catchment Area GloFAS km² | LAT Prov | LON Prov | LAT GloFAS | LON GloFAS |
|---------|-----------|-------------------------|--------------|-------------|-----------|-----------|-------------|-----------------------------|---------------------------|----------|----------|------------|------------|
| Myanmar | Asia      | -                       | -            | -           | G4544     | Synthetic | -           | -                           | 25030                     | -        | -        | 25.75      | 97.55      |
| Myanmar | Asia      | -                       | -            | -           | G4595     | Synthetic | -           | -                           | 85363                     | -        | -        | 24.05      | 96.25      |
| Myanmar | Asia      | -                       | -            | -           | G4620     | Synthetic | -           | -                           | 73314                     | -        | -        | 23.25      | 94.35      |
| Myanmar | Asia      | -                       | -            | -           | G4624     | Synthetic | -           | -                           | 24210                     | -        | -        | 23.15      | 94.25      |
| Myanmar | Asia      | -                       | -            | -           | G4645     | Synthetic | -           | -                           | 19416                     | -        | -        | 22.05      | 95.65      |
| Myanmar | Asia      | -                       | -            | -           | G4649     | Synthetic | -           | -                           | 174406                    | -        | -        | 21.95      | 95.65      |
| Myanmar | Asia      | -                       | -            | -           | G4650     | Synthetic | -           | -                           | 125653                    | -        | -        | 21.95      | 96.05      |
| Myanmar | Asia      | -                       | -            | -           | G4654     | Synthetic | -           | -                           | 31023                     | -        | -        | 21.85      | 96.05      |
| Myanmar | Asia      | -                       | -            | -           | G4659     | Synthetic | -           | -                           | 15770                     | -        | -        | 21.75      | 95.95      |
| Myanmar | Asia      | -                       | -            | -           | G4665     | Synthetic | -           | -                           | 114416                    | -        | -        | 21.55      | 95.25      |
| Myanmar | Asia      | -                       | -            | -           | G4668     | Synthetic | -           | -                           | 196940                    | -        | -        | 21.45      | 95.35      |
| Myanmar | Asia      | -                       | -            | -           | G4672     | Synthetic | -           | -                           | 15580                     | -        | -        | 21.35      | 100.75     |
| Myanmar | Asia      | -                       | -            | -           | G4673     | Synthetic | -           | -                           | 163203                    | -        | -        | 21.35      | 100.85     |
| Myanmar | Asia      | -                       | -            | -           | G4686     | Synthetic | -           | -                           | 12454                     | -        | -        | 21.05      | 98.45      |
| Myanmar | Asia      | -                       | -            | -           | G4689     | Synthetic | -           | -                           | 164822                    | -        | -        | 20.95      | 98.55      |
| Myanmar | Asia      | -                       | -            | -           | G4713     | Synthetic | -           | -                           | 190783                    | -        | -        | 19.95      | 97.85      |
| Myanmar | Asia      | -                       | -            | -           | G4745     | Synthetic | -           | -                           | 19832                     | -        | -        | 18.95      | 97.25      |
| Myanmar | Asia      | -                       | -            | -           | G4751     | Synthetic | -           | -                           | 218546                    | -        | -        | 18.85      | 97.45      |
| Myanmar | Asia      | -                       | -            | -           | G4802     | Synthetic | -           | -                           | 15407                     | -        | -        | 17.75      | 97.75      |
| Nepal   | Asia      | Chisapani               | Karnali      | Ganges      | G0915     | DHM       | 280         | 42890                       | 46325                     | 28.64    | 81.29    | 28.75      | 81.25      |
| Nepal   | Asia      | Bimalnagar              | Marshyandi   | Ganges      | G3955     | DHM       | 439         | 3774                        | 3607                      | 27.950   | 84.428   | 28.15      | 84.45      |
| Nepal   | Asia      | Jomsom                  | Kali Gandaki | Ganges      | G3980     | DHM       | 403         | -                           | 3592                      | 28.791   | 83.75    | 28.65      | 83.55      |
| Nepal   | Asia      | Majhitar                | Tamur        | Ganges      | G4012     | DHM       | 684         | 4050                        | 4192                      | 27.149   | 87.705   | 27.25      | 87.65      |
| Nepal   | Asia      | Pachuwarghat            | Sunkosi      | Ganges      | G4073     | DHM       | 630         | 4920                        | 4723                      | 27.551   | 85.749   | 27.55      | 85.75      |
| Nepal   | Asia      | Darchula                | Mahakali     | Ganges      | G4159     | Red       | -           | -                           | 3445                      | 29.797   | 80.421   | 29.75      | 80.45      |
| Nepal   | Asia      | Turkighat               | Arun         | Ganges      | G4367     | DHM       | 604         | 28200                       | 28257                     | 27.311   | 87.188   | 27.45      | 87.15      |
| Nepal   | Asia      | Asaraghat               | Karnali      | Ganges      | G4385     | DHM       | 240         | 19260                       | 20859                     | 28.949   | 81.446   | 29.15      | 81.55      |
| Nepal   | Asia      | Samajhighat             | Bheri        | Ganges      | G4393     | DHM       | 269         | 12200                       | 12208                     | 28.517   | 81.666   | 28.45      | 81.95      |
| Nepal   | Asia      | Rai goan                | Bagmati      | Ganges      | G4399     | DHM       | 586         | -                           | 2871                      | 27.16    | 85.49    | 27.25      | 85.45      |
| Nepal   | Asia      | Kampughat               | Sunkosi      | Ganges      | G4403     | DHM       | 680         | 17600                       | 17627                     | 26.871   | 86.828   | 26.85      | 86.85      |
| Nepal   | Asia      | Chepang                 | Babai        | Ganges      | G4416     | DHM       | 289         | 2557                        | 2632                      | 28.341   | 81.733   | 28.25      | 81.85      |
| Nepal   | Asia      | Majhitar                | Tamur        | Ganges      | G4425     | DHM       | 690         | 5640                        | 5520                      | 26.930   | 87.321   | 27.05      | 87.55      |
| Nepal   | Asia      | Devghat                 | Narayani     | Ganges      | G4449     | DHM       | 450         | 31100                       | 32081                     | 27.708   | 84.431   | 27.75      | 84.45      |
| Nepal   | Asia      | Kusum                   | West Rapti   | Ganges      | G4456     | DHM       | 375         | 5200                        | 5269                      | 28.007   | 82.093   | 27.85      | 82.35      |
| Nepal   | Asia      | Dipayal                 | Seti         | Ganges      | G4469     | DHM       | -           | -                           | 4872                      | 29.251   | 80.946   | 29.25      | 80.95      |
| Nepal   | Asia      | Chatara                 | Saptakoshi   | Ganges      | G4475     | DHM       | 695         | 54100                       | 54948                     | 26.853   | 87.151   | 26.95      | 87.15      |
| Nepal   | Asia      | After Lothar Confluence | East Rapti   | Ganges      | G4482     | DHM       | -           | -                           | 1876                      | 27.568   | 84.667   | 27.55      | 84.55      |
| Nepal   | Asia      | Betrawati               | Trishuli     | Ganges      | G4502     | DHM       | 447         | 4110                        | 4594                      | 27.967   | 85.178   | 28.05      | 85.25      |
| Nepal   | Asia      | Khurkot                 | Sunkosi      | Ganges      | G4510     | DHM       | 652         | 10000                       | 9898                      | 27.336   | 85.993   | 27.25      | 86.05      |

| Country  | Continent | Station Name | River Name    | River Basin | GloFAS ID | Provider  | Provider ID | Catchment Area Provided km² | Catchment Area GloFAS km² | LAT Prov | LON Prov | LAT GloFAS | LON GloFAS |
|----------|-----------|--------------|---------------|-------------|-----------|-----------|-------------|-----------------------------|---------------------------|----------|----------|------------|------------|
| Nepal    | Asia      | Rabuwabazar  | Dudhakosi     | Ganges      | G4514     | DHM       | 670         | 4100                        | 4189                      | 27.268   | 86.658   | 27.25      | 86.55      |
| Nepal    | Asia      | Angsing      | Kaligandaki   | Ganges      | G4541     | DHM       | 419         | 10020                       | 9510                      | 27.89    | 83.8     | 27.95      | 83.55      |
| Nepal    | Asia      | Shisaghat    | Madi          | Ganges      | G4550     | DHM       | 438         | 858                         | 986                       | 28.094   | 84.232   | 28.15      | 84.25      |
| Nepal    | Asia      | Mainachuli   | Kankai        | Ganges      | G4569     | DHM       | 795         | 1148                        | 1110                      | 26.686   | 87.876   | 26.55      | 87.85      |
| Nepal    | Asia      | Arughat      | Burhi Gandaki | Ganges      | G4578     | DHM       | 445         | 4270                        | 4046                      | 28.037   | 84.817   | 28.05      | 84.85      |
| Nepal    | Asia      | Simle        | Arun          | Ganges      | G4619     | DHM       | 606         | 30380                       | 30580                     | 26.928   | 87.158   | 27.05      | 87.15      |
| Nepal    | Asia      | Butwal       | Tinaukhola    | Ganges      | G4674     | DHM       | 390         | 554                         | 661                       | 27.702   | 83.463   | 27.75      | 83.45      |
| Oman     | Asia      | Ibra         | Wadi Ibra     | -           | G0932     | GRDC      | 2124300     | -                           | 1720                      | 22.590   | 58.623   | 22.55      | 58.65      |
| Oman     | Asia      | -            | -             | -           | G4657     | Synthetic | -           | -                           | 25060                     | -        | -        | 21.75      | 55.95      |
| Oman     | Asia      | -            | -             | -           | G4661     | Synthetic | -           | -                           | 15203                     | -        | -        | 21.65      | 55.95      |
| Oman     | Asia      | -            | -             | -           | G4737     | Synthetic | -           | -                           | 37392                     | -        | -        | 19.15      | 54.35      |
| Oman     | Asia      | -            | -             | -           | G4738     | Synthetic | -           | -                           | 14402                     | -        | -        | 19.15      | 54.45      |
| Pakistan | Asia      | -            | Chenab        | Indus       | G1728     | DFO       | 68          | 54111                       | 38897                     | 31.904   | 73.125   | 31.95      | 73.15      |
| Pakistan | Asia      | -            | Chenab        | Indus       | G1794     | DFO       | 284         | 55688                       | 43231                     | 31.544   | 72.495   | 31.55      | 72.45      |
| Pakistan | Asia      | -            | Jhelum        | Indus       | G1795     | DFO       | 285         | -                           | 45827                     | 31.904   | 72.225   | 31.85      | 72.25      |
| Pakistan | Asia      | -            | Chenab        | Indus       | G1796     | DFO       | 286         | 53587                       | 36050                     | 32.264   | 73.575   | 32.25      | 73.55      |
| Pakistan | Asia      | -            | Ravi          | Indus       | G1797     | DFO       | 288         | -                           | 17717                     | 31.364   | 74.025   | 31.35      | 74.05      |
| Pakistan | Asia      | -            | Indus         | Indus       | G1798     | DFO       | 290         | 422834                      | 409279                    | 31.094   | 70.785   | 31.05      | 70.75      |
| Pakistan | Asia      | -            | Indus         | Indus       | G1799     | DFO       | 291         | 372272                      | 362667                    | 31.634   | 70.875   | 31.65      | 70.85      |
| Pakistan | Asia      | -            | Indus         | Indus       | G1800     | DFO       | 292         | 366514                      | 352546                    | 32.174   | 71.235   | 32.15      | 71.25      |
| Pakistan | Asia      | -            | Indus         | Indus       | G1801     | DFO       | 294         | 201449                      | 202925                    | 33.974   | 72.495   | 33.95      | 72.55      |
| Pakistan | Asia      | -            | Indus         | Indus       | G1923     | DFO       | 2000        | 630577                      | 717916                    | 29.024   | 70.605   | 29.05      | 70.55      |
| Pakistan | Asia      | -            | Indus         | Indus       | G1924     | DFO       | 2001        | 799013                      | 853424                    | 25.874   | 68.265   | 25.85      | 68.25      |
| Pakistan | Asia      | -            | Indus         | Indus       | G1925     | DFO       | 2002        | 813113                      | 866131                    | 24.254   | 67.815   | 24.25      | 67.75      |
| Pakistan | Asia      | -            | Chenab        | Indus       | G1986     | DFO       | 100052      | 630577                      | 290910                    | 29.294   | 70.965   | 29.25      | 70.95      |
| Pakistan | Asia      | Pakistan 2   | Indus         | Indus       | G1987     | DFO       | 100053      | 778949                      | 743250                    | 27.764   | 68.625   | 27.75      | 68.65      |
| Pakistan | Asia      | -            | -             | -           | G4210     | Synthetic | -           | -                           | 14196                     | -        | -        | 34.25      | 71.65      |
| Pakistan | Asia      | -            | -             | -           | G4215     | Synthetic | -           | -                           | 71080                     | -        | -        | 34.15      | 71.55      |
| Pakistan | Asia      | -            | -             | -           | G4226     | Synthetic | -           | -                           | 94470                     | -        | -        | 33.95      | 72.15      |
| Pakistan | Asia      | -            | -             | -           | G4256     | Synthetic | -           | -                           | 323523                    | -        | -        | 32.75      | 71.45      |
| Pakistan | Asia      | -            | -             | -           | G4260     | Synthetic | -           | -                           | 25875                     | -        | -        | 32.65      | 71.25      |
| Pakistan | Asia      | -            | -             | -           | G4283     | Synthetic | -           | -                           | 17656                     | -        | -        | 32.05      | 69.75      |
| Pakistan | Asia      | -            | -             | -           | G4288     | Synthetic | -           | -                           | 15888                     | -        | -        | 31.95      | 69.75      |
| Pakistan | Asia      | -            | -             | -           | G4316     | Synthetic | -           | -                           | 49954                     | -        | -        | 31.25      | 72.15      |
| Pakistan | Asia      | -            | -             | -           | G4344     | Synthetic | -           | -                           | 101271                    | -        | -        | 30.75      | 71.85      |
| Pakistan | Asia      | -            | -             | -           | G4350     | Synthetic | -           | -                           | 38445                     | -        | -        | 30.65      | 71.95      |
| Pakistan | Asia      | -            | -             | -           | G4383     | Synthetic | -           | -                           | 17730                     | -        | -        | 29.45      | 71.15      |
| Pakistan | Asia      | -            | -             | -           | G4391     | Synthetic | -           | -                           | 110304                    | -        | -        | 29.35      | 71.25      |
| Pakistan | Asia      | -            | -             | -           | G4398     | Synthetic | -           | -                           | 11340                     | -        | -        | 29.25      | 64.75      |

| Country            | Continent | Station Name          | River Name     | River Basin | GloFAS ID | Provider  | Provider ID | Catchment Area Provided km² | Catchment Area GloFAS km² | LAT Prov | LON Prov | LAT GloFAS | LON GloFAS |
|--------------------|-----------|-----------------------|----------------|-------------|-----------|-----------|-------------|-----------------------------|---------------------------|----------|----------|------------|------------|
| Pakistan           | Asia      | -                     | -              | -           | G4402     | Synthetic | -           | -                           | 24886                     | -        | -        | 29.15      | 64.85      |
| Pakistan           | Asia      | -                     | -              | -           | G4408     | Synthetic | -           | -                           | 13859                     | -        | -        | 28.95      | 70.35      |
| Pakistan           | Asia      | -                     | -              | -           | G4409     | Synthetic | -           | -                           | 19856                     | -        | -        | 28.95      | 71.65      |
| Pakistan           | Asia      | -                     | -              | -           | G4419     | Synthetic | -           | -                           | 74776                     | -        | -        | 28.75      | 71.75      |
| Pakistan           | Asia      | -                     | -              | -           | G4437     | Synthetic | -           | -                           | 42562                     | -        | -        | 28.25      | 63.05      |
| Pakistan           | Asia      | -                     | -              | -           | G4439     | Synthetic | -           | -                           | 21863                     | -        | -        | 28.15      | 62.85      |
| Pakistan           | Asia      | -                     | -              | -           | G4440     | Synthetic | -           | -                           | 36391                     | -        | -        | 28.15      | 63.05      |
| Pakistan           | Asia      | -                     | -              | -           | G4441     | Synthetic | -           | -                           | 13655                     | -        | -        | 28.15      | 68.05      |
| Pakistan           | Asia      | -                     | -              | -           | G4444     | Synthetic | -           | -                           | 16415                     | -        | -        | 27.95      | 67.55      |
| Pakistan           | Asia      | -                     | -              | -           | G4445     | Synthetic | -           | -                           | 32049                     | -        | -        | 27.95      | 67.65      |
| Pakistan           | Asia      | -                     | -              | -           | G4446     | Synthetic | -           | -                           | 20133                     | -        | -        | 27.95      | 71.35      |
| Pakistan           | Asia      | -                     | -              | -           | G4448     | Synthetic | -           | -                           | 15834                     | -        | -        | 27.85      | 71.25      |
| Pakistan           | Asia      | -                     | -              | -           | G4453     | Synthetic | -           | -                           | 49565                     | -        | -        | 27.75      | 67.65      |
| Pakistan           | Asia      | -                     | -              | -           | G4454     | Synthetic | -           | -                           | 29138                     | -        | -        | 27.75      | 67.75      |
| Pakistan           | Asia      | -                     | -              | -           | G4470     | Synthetic | -           | -                           | 15703                     | -        | -        | 27.15      | 63.35      |
| Pakistan           | Asia      | -                     | -              | -           | G4471     | Synthetic | -           | -                           | 12856                     | -        | -        | 27.15      | 63.45      |
| Pakistan           | Asia      | -                     | -              | -           | G4500     | Synthetic | -           | -                           | 749669                    | -        | -        | 26.55      | 67.95      |
| Pakistan           | Asia      | -                     | -              | -           | G4509     | Synthetic | -           | -                           | 97965                     | -        | -        | 26.35      | 67.75      |
| Pakistan           | Asia      | -                     | -              | -           | G4520     | Synthetic | -           | -                           | 12492                     | -        | -        | 26.05      | 62.85      |
| Pakistan           | Asia      | -                     | -              | -           | G4521     | Synthetic | -           | -                           | 12868                     | -        | -        | 26.05      | 65.15      |
| Pakistan           | Asia      | -                     | -              | -           | G4566     | Synthetic | -           | -                           | 177604                    | -        | -        | 25.25      | 69.55      |
| Papua New Guinea   | Asia      | -                     | Fly            | -           | G1729     | DFO       | 70          | -                           | 57246                     | -7.785   | 141.61   | -7.75      | 141.65     |
| Papua New Guinea   | Asia      | -                     | -              | -           | G5416     | Synthetic | -           | -                           | 57411                     | -        | -        | -4.25      | 143.75     |
| Papua New Guinea   | Asia      | -                     | -              | -           | G5525     | Synthetic | -           | -                           | 19452                     | -        | -        | -7.55      | 141.25     |
| Papua New Guinea   | Asia      | -                     | -              | -           | G5526     | Synthetic | -           | -                           | 34871                     | -        | -        | -7.55      | 141.45     |
| Philippines        | Asia      | -                     | Cagayan Mouth  | -           | G1964     | DFO       | 2190        | -                           | 27202                     | 18.134   | 121.63   | 18.15      | 121.65     |
| Philippines        | Asia      | -                     | Tarlac         | -           | G1965     | DFO       | 2201        | -                           | 1795                      | 15.614   | 120.55   | 15.65      | 120.55     |
| Philippines        | Asia      | -                     | Pampanga Delta | -           | G1966     | DFO       | 2205        | -                           | 9459                      | 14.894   | 120.73   | 14.95      | 120.75     |
| Philippines        | Asia      | -                     | Tarlac         | -           | G1967     | DFO       | 2206        | -                           | 240                       | 15.344   | 120.46   | 15.35      | 120.45     |
| Philippines        | Asia      | -                     | Tineg          | -           | G1968     | DFO       | 2209        | -                           | 4977                      | 17.594   | 120.64   | 17.55      | 120.55     |
| Philippines        | Asia      | -                     | Mindanao       | -           | G1969     | DFO       | 2214        | -                           | 20544                     | 7.154    | 124.33   | 7.15       | 124.35     |
| Philippines        | Asia      | -                     | Pulangi        | -           | G1970     | DFO       | 2216        | -                           | 6759                      | 7.154    | 124.78   | 7.15       | 124.75     |
| Philippines        | Asia      | -                     | Samar          | Samar       | G4616     | Philippin | -           | -                           | 606                       | -        | -        | 12.45      | 124.65     |
| Philippines        | Asia      | -                     | Agustan        | Agustan     | G4945     | Philippin | -           | -                           | 7859                      | -        | -        | 8.35       | 125.85     |
| Philippines        | Asia      | -                     | Agustan        | Agustan     | G5368     | Philippin | -           | -                           | 11783                     | -        | -        | 8.75       | 125.55     |
| Philippines        | Asia      | -                     | Panay          | Panay       | G5369     | Philippin | -           | -                           | 1703                      | -        | -        | 11.45      | 122.75     |
| Russian Federation | Asia      | Stolb                 | Lena           | Lena        | G0001     | GRDC      | 2903430     | 2460000                     | 2443690                   | 72.37    | 126.8    | 72.25      | 126.75     |
| Russian Federation | Asia      | 7 5Km D S Of Mouth Of | Olenek         | Olenek      | G0002     | GRDC      | 2999910     | 198000                      | 218622                    | 72.12    | 123.22   | 72.15      | 123.35     |
| Russian Federation | Asia      | Saskylakh             | Anabar         | Anabar      | G0003     | GRDC      | 2999150     | 78800                       | 86783                     | 71.98    | 114.05   | 71.95      | 114.05     |

| Country            | Continent | Station Name         | River Name        | River Basin | GloFAS ID | Provider | Provider ID | Catchment Area Provided km² | Catchment Area GloFAS km² | LAT Prov | LON Prov | LAT GloFAS | LON GloFAS |
|--------------------|-----------|----------------------|-------------------|-------------|-----------|----------|-------------|-----------------------------|---------------------------|----------|----------|------------|------------|
| Russian Federation | Asia      | Khatanga             | Khatanga          | Khatanga    | G0004     | GRDC     | 2999850     | 275000                      | 285113                    | 71.98    | 102.45   | 71.95      | 102.15     |
| Russian Federation | Asia      | Ubileynaya           | Yana              | Yana        | G0005     | GRDC     | 2998110     | 224000                      | 239824                    | 70.75    | 136.08   | 70.75      | 136.05     |
| Russian Federation | Asia      | Kyusyur Kusur        | Lena              | Lena        | G0006     | GRDC     | 2903420     | 2430000                     | 2422810                   | 70.7     | 127.65   | 70.85      | 127.55     |
| Russian Federation | Asia      | Vorontsovo           | Indigirka         | Indigirka   | G0011     | GRDC     | 2998400     | 305000                      | 306379                    | 69.58    | 147.35   | 68.55      | 147.05     |
| Russian Federation | Asia      | Namu                 | Omoloy            | Omoloy      | G0012     | GRDC     | 2998150     | 10800                       | 10674                     | 69.51    | 132.07   | 69.45      | 132.25     |
| Russian Federation | Asia      | Andrushkino          | Alazeya           | Alazeya     | G0014     | GRDC     | 2998450     | 29000                       | 28085                     | 69.17    | 154.5    | 69.25      | 154.75     |
| Russian Federation | Asia      | Kolymskaya           | Kolyma            | Kolyma      | G0016     | GRDC     | 2998510     | 526000                      | 570460                    | 68.73    | 158.72   | 68.75      | 158.75     |
| Russian Federation | Asia      | Sukhana              | Olenek            | Olenek      | G0018     | GRDC     | 2999920     | 127000                      | 127062                    | 68.62    | 118.33   | 67.75      | 116.35     |
| Russian Federation | Asia      | Argahtah             | Alazeya           | Alazeya     | G0020     | GRDC     | 2998451     | 17700                       | 16293                     | 68.5     | 153.42   | 68.45      | 153.35     |
| Russian Federation | Asia      | Konstantinovo        | Bol. Anyuy        | Kolyma      | G0023     | GRDC     | 2998720     | 49600                       | 52084                     | 68.15    | 161.17   | 68.15      | 161.15     |
| Russian Federation | Asia      | Ostrovnoje           | Anyuy             | Kolyma      | G0024     | GRDC     | 2998702     | 30000                       | 32418                     | 68.1     | 164.17   | 68.15      | 164.15     |
| Russian Federation | Asia      | Igarka               | Yenisey           | Yenisei     | G0031     | GRDC     | 2909150     | 2440000                     | 2651150                   | 67.48    | 86.5     | 67.45      | 86.45      |
| Russian Federation | Asia      | Sredne Kolymsk       | Kolyma            | Kolyma      | G0035     | GRDC     | 2998500     | 361000                      | 392174                    | 67.37    | 153.67   | 67.25      | 153.65     |
| Russian Federation | Asia      | Samburg              | Pur               | Pur         | G0040     | GRDC     | 2999500     | 95100                       | 94633                     | 67       | 78.22    | 66.55      | 78.05      |
| Russian Federation | Asia      | Sidorovsk            | Taz               | Taz         | G0046     | GRDC     | 2999250     | 100000                      | 134688                    | 66.6     | 82.28    | 66.65      | 82.25      |
| Russian Federation | Asia      | Salekhard            | Ob                | Ob          | G0047     | GRDC     | 2912600     | 2949998                     | 2541170                   | 66.57    | 66.53    | 66.55      | 66.45      |
| Russian Federation | Asia      | Bol Porog            | Nizhnaya Tunguska | Yenisei     | G0058     | GRDC     | 2909705     | 447000                      | 464991                    | 65.63    | 90.02    | 63.85      | 97.85      |
| Russian Federation | Asia      | Nadym                | Nadym             | Nadym       | G0059     | GRDC     | 2999200     | 48000                       | 49934                     | 65.62    | 72.67    | 65.45      | 72.75      |
| Russian Federation | Asia      | Snezhnoye            | Anadyr            | Anadyr      | G0062     | GRDC     | 2901201     | 106000                      | 109281                    | 65.45    | 172.97   | 65.15      | 172.25     |
| Russian Federation | Asia      | Yurty                | Indigirka         | Indigirka   | G0089     | GRDC     | 2998401     | 51100                       | 52635                     | 64.05    | 141.88   | 63.95      | 141.95     |
| Russian Federation | Asia      | Hatyrik Homo         | Vilyuy            | Lena        | G0091     | GRDC     | 2903700     | 452000                      | 370905                    | 63.95    | 124.83   | 64.05      | 126.65     |
| Russian Federation | Asia      | Verkhoyanski Perevoz | Aldan             | Lena        | G0100     | GRDC     | 2903600     | 696000                      | 726296                    | 63.32    | 132.02   | 63.25      | 132.05     |
| Russian Federation | Asia      | Kamenskoye           | Penzhina          | -           | G0116     | GRDC     | 2901300     | 71600                       | 62743                     | 62.42    | 166.03   | 62.45      | 165.25     |
| Russian Federation | Asia      | Tabaga               | Lena              | Lena        | G0126     | GRDC     | 2903429     | 897000                      | 899098                    | 61.83    | 129.6    | 61.05      | 126.95     |
| Russian Federation | Asia      | Pod Tunguska         | Yenisey           | Yenisei     | G0129     | GRDC     | 2909152     | 1760000                     | 1814930                   | 61.6     | 90.08    | 61.55      | 90.05      |
| Russian Federation | Asia      | Belogorje            | Ob                | Ob          | G0141     | GRDC     | 2912602     | 2690000                     | 2261080                   | 61.07    | 68.6     | 61.05      | 68.75      |
| Russian Federation | Asia      | Hanti Mansisk        | Irtys             | Ob          | G0142     | GRDC     | 2911095     | 1200000                     | 1180900                   | 60.97    | 69.07    | 60.95      | 69.05      |
| Russian Federation | Asia      | Solyanka             | Lena              | Lena        | G0155     | GRDC     | 2903428     | 770000                      | 794079                    | 60.48    | 120.7    | 60.45      | 120.75     |
| Russian Federation | Asia      | Krestovski           | Lena              | Lena        | G0166     | GRDC     | 2903427     | 440000                      | 461132                    | 59.73    | 113.17   | 59.75      | 113.15     |
| Russian Federation | Asia      | Yeniseisk            | Yenisey           | Yenisei     | G0191     | GRDC     | 2909153     | 1400000                     | 1444160                   | 58.45    | 92.15    | 58.15      | 92.85      |
| Russian Federation | Asia      | Kolpashevo           | Ob                | Ob          | G0194     | GRDC     | 2910601     | 486000                      | 489861                    | 58.3     | 82.88    | 57.75      | 83.75      |
| Russian Federation | Asia      | Tobolsk              | Irtys             | Ob          | G0195     | GRDC     | 2911097     | 1500000                     | 1024150                   | 58.2     | 68.23    | 58.25      | 68.15      |
| Russian Federation | Asia      | Tatarka              | Angara            | Yenisei     | G0197     | GRDC     | 2908100     | 1040000                     | 1069040                   | 58.18    | 93.37    | 58.05      | 93.95      |
| Russian Federation | Asia      | Bodaibo              | Vitim             | Lena        | G0204     | GRDC     | 2903050     | 186000                      | 186758                    | 57.82    | 114.17   | 57.55      | 116.45     |
| Russian Federation | Asia      | Mashukovka           | Taseeva           | Yenisei     | G0205     | GRDC     | 2908305     | 127000                      | 128179                    | 57.82    | 94.32    | 57.75      | 94.55      |
| Russian Federation | Asia      | Zmeinovo             | Lena              | Lena        | G0206     | GRDC     | 2903426     | 140000                      | 141303                    | 57.78    | 108.32   | 57.65      | 108.05     |
| Russian Federation | Asia      | Baturino             | Chulym            | Ob          | G0207     | GRDC     | 2910310     | 131000                      | 133661                    | 57.78    | 85.15    | 57.75      | 85.45      |
| Russian Federation | Asia      | Chulbu               | Uchur             | Lena        | G0208     | GRDC     | 2903087     | 108000                      | 109159                    | 57.77    | 130.9    | 57.75      | 130.65     |
| Russian Federation | Asia      | Ust Ishim            | Irtys             | Ob          | G0209     | GRDC     | 2911098     | 564000                      | 586993                    | 57.7     | 71.17    | 57.75      | 71.15      |

| Country            | Continent | Station Name             | River Name | River Basin | GloFAS ID | Provider | Provider ID | Catchment Area Provided km² | Catchment Area GloFAS km² | LAT Prov | LON Prov | LAT GloFAS | LON GloFAS |
|--------------------|-----------|--------------------------|------------|-------------|-----------|----------|-------------|-----------------------------|---------------------------|----------|----------|------------|------------|
| Russian Federation | Asia      | Vikulovo                 | Ishim      | Ob          | G0216     | GRDC     | 2911303     | 151000                      | 130857                    | 56.82    | 70.63    | 56.85      | 70.65      |
| Russian Federation | Asia      | Yalutorovsk              | Tobol      | Ob          | G0221     | GRDC     | 2912302     | 241000                      | 209840                    | 56.67    | 66.35    | 56.65      | 66.35      |
| Russian Federation | Asia      | Tomsk                    | Tom        | Ob          | G0223     | GRDC     | 2910300     | 57000                       | 59858                     | 56.5     | 84.92    | 56.45      | 84.95      |
| Russian Federation | Asia      | Bratskaya                | Angara     | Yenisei     | G0229     | GRDC     | 2908102     | 736000                      | 753241                    | 56.28    | 101.73   | 56.25      | 101.75     |
| Russian Federation | Asia      | Bolshie Scheki           | Kamchatka  | Kamchatka   | G0231     | GRDC     | 2902850     | 51600                       | 51964                     | 56.27    | 161.67   | 56.25      | 161.25     |
| Russian Federation | Asia      | Krasnoyarskaya Ges       | Yenisey    | Yenisei     | G0253     | GRDC     | 2909156     | 289000                      | 300317                    | 55.46    | 92.3     | 55.95      | 92.35      |
| Russian Federation | Asia      | Omsk                     | Irtys      | Ob          | G0264     | GRDC     | 2911100     | 769000                      | 345387                    | 55.02    | 73.21    | 55.15      | 73.15      |
| Russian Federation | Asia      | Kamen - Obi              | Ob         | Ob          | G0282     | GRDC     | 2910606     | 216000                      | 216034                    | 53.8     | 81.33    | 53.75      | 81.55      |
| Russian Federation | Asia      | Chasovaya                | Shilka     | Amur        | G0289     | GRDC     | 2906201     | 200000                      | 201973                    | 53.42    | 119.97   | 53.45      | 119.85     |
| Russian Federation | Asia      | Nemilen                  | Nimelen    | Amur        | G0312     | GRDC     | 2906880     | -                           | 10441                     | 52.56    | 136.5    | 52.55      | 136.45     |
| Russian Federation | Asia      | Bogorodskoye             | Amur       | Amur        | G0314     | GRDC     | 2906901     | 1790000                     | 1809880                   | 52.53    | 140.47   | 49.55      | 136.65     |
| Russian Federation | Asia      | Mostovoy                 | Selenga    | Yenisei     | G0327     | GRDC     | 2907400     | 440200                      | 447050                    | 52.03    | 107.48   | 52.05      | 107.45     |
| Russian Federation | Asia      | Kyzyl                    | Yenisey    | Yenisei     | G0341     | GRDC     | 2909160     | 115000                      | 119865                    | 51.72    | 94.4     | 51.75      | 94.45      |
| Russian Federation | Asia      | Komsomolsk               | Amur       | Amur        | G0376     | GRDC     | 2906900     | 1730000                     | 1846250                   | 50.63    | 137.12   | 50.55      | 137.15     |
| Russian Federation | Asia      | Malinovka                | Bureya     | Amur        | G0409     | GRDC     | 2906300     | 67400                       | 67449                     | 49.78    | 129.92   | 50.05      | 130.05     |
| Russian Federation | Asia      | Khabarovsk               | Amur       | Amur        | G0457     | GRDC     | 2906700     | 1630000                     | 1546670                   | 48.43    | 135.05   | 48.45      | 134.95     |
| Russian Federation | Asia      | Kolyma At Orotuk         | Kolyma     | Kolyma      | G1514     | SHI      | 1001        | 43600                       | 43063                     | 62.12    | 148.47   | 62.15      | 148.05     |
| Russian Federation | Asia      | Kulu At Kulu             | Kulu       | Kolyma      | G1515     | SHI      | 1095        | 10300                       | 10952                     | 61.9     | 147.42   | 61.65      | 147.45     |
| Russian Federation | Asia      | Bokhalcha At 5 4 Km From | Bokhalcha  | Kolyma      | G1516     | SHI      | 1176        | 13600                       | 13629                     | 62.1     | 150.67   | 61.95      | 150.85     |
| Russian Federation | Asia      | Anuy At Ostrovnoye       | Anyuy      | Kolyma      | G1517     | SHI      | 1397        | 30000                       | 32418                     | 68.1     | 164.17   | 68.15      | 164.15     |
| Russian Federation | Asia      | Lena At Kachug           | Lena       | Lena        | G1518     | SHI      | 3003        | 17400                       | 17536                     | 53.97    | 105.88   | 53.95      | 105.85     |
| Russian Federation | Asia      | Kirenga At Shorokhovo    | Kirenga    | Lena        | G1519     | SHI      | 3087        | 46500                       | 46458                     | 57.63    | 108.12   | 57.25      | 108.05     |
| Russian Federation | Asia      | Nuya At Kurum            | Nuya       | Lena        | G1520     | SHI      | 3156        | 32600                       | 35650                     | 60.27    | 114.73   | 60.95      | 115.05     |
| Russian Federation | Asia      | Bol Shoy Patom At        | Bol'shoy   | Lena        | G1521     | SHI      | 3157        | 27600                       | 27912                     | 60.17    | 116.8    | 60.05      | 116.95     |
| Russian Federation | Asia      | Namana At Myakinda       | Namana     | Lena        | G1522     | SHI      | 3202        | 16600                       | 16560                     | 60.9     | 120.8    | 61.05      | 120.65     |
| Russian Federation | Asia      | Tuolba At Alekseevka     | Tuolba     | Lena        | G1523     | SHI      | 3206        | 14400                       | 14362                     | 60.28    | 124      | 60.35      | 124.15     |
| Russian Federation | Asia      | Buotama At Brolog        | Buotama    | Lena        | G1524     | SHI      | 3210        | 12200                       | 12338                     | 61.05    | 128.65   | 61.05      | 127.95     |
| Russian Federation | Asia      | Aldan At Tommot          | Aldan      | Lena        | G1525     | SHI      | 3219        | 49500                       | 49645                     | 58.97    | 126.27   | 59.05      | 125.75     |
| Russian Federation | Asia      | Allakh Yun At Allakh     | Allakh     | Lena        | G1526     | SHI      | 3277        | 24200                       | 24296                     | 60.68    | 135.03   | 60.65      | 135.95     |
| Russian Federation | Asia      | Amga At Buyaga           | Amga       | Lena        | G1527     | SHI      | 3291        | 23900                       | 23022                     | 59.67    | 127.05   | 59.65      | 127.05     |
| Russian Federation | Asia      | Malaya Kuonapka At       | Malaya     | Anabar      | G1528     | SHI      | 3403        | 20300                       | 21705                     | 70.13    | 113.97   | 70.15      | 113.95     |
| Russian Federation | Asia      | Yana At Verkhoyansk      | Yana       | Yana        | G1529     | SHI      | 3414        | 45300                       | 47446                     | 67.34    | 133.38   | 67.55      | 133.25     |
| Russian Federation | Asia      | Bytantay At Asar         | Bytantay   | Yana        | G1530     | SHI      | 3483        | 40000                       | 37939                     | 68.62    | 134.12   | 68.65      | 133.55     |
| Russian Federation | Asia      | Algi At Algi 42 Km Up Of | Algi       | Indigirka   | G1531     | SHI      | 3507        | 17600                       | 17587                     | 64.4     | 142      | 64.65      | 141.45     |
| Russian Federation | Asia      | Nera At Nerskaya Truda   | Nera       | Indigirka   | G1532     | SHI      | 3518        | 22300                       | 22526                     | 64.43    | 144.37   | 64.45      | 144.45     |
| Russian Federation | Asia      | Verkhnyaya Angara At     | Verkhnyaya | Yenisei     | G1533     | SHI      | 7015        | 20600                       | 20388                     | 55.85    | 110.15   | 55.85      | 109.95     |
| Russian Federation | Asia      | Barguzin At Barguzin     | Barguzin   | Yenisei     | G1534     | SHI      | 7024        | 19800                       | 20052                     | 53.6     | 109.6    | 53.55      | 109.65     |
| Russian Federation | Asia      | Chikoy At Gremyachka     | Chikoy     | Yenisei     | G1535     | SHI      | 7072        | 15600                       | 15607                     | 50.3     | 108.63   | 50.35      | 108.85     |
| Russian Federation | Asia      | Khilok At Khailastuy     | Khilok     | Yenisei     | G1536     | SHI      | 7102        | 38300                       | 38980                     | 51.2     | 106.97   | 51.05      | 107.05     |



| Country            | Continent | Station Name            | River Name | River Basin | GloFAS ID | Provider  | Provider ID | Catchment Area Provided km² | Catchment Area GloFAS km² | LAT Prov | LON Prov | LAT GloFAS | LON GloFAS |
|--------------------|-----------|-------------------------|------------|-------------|-----------|-----------|-------------|-----------------------------|---------------------------|----------|----------|------------|------------|
| Russian Federation | Asia      | Iya At Tulun            | Iya        | Yenisei     | G1537     | SHI       | 8233        | 14500                       | 14730                     | 54.58    | 100.62   | 54.45      | 100.55     |
| Russian Federation | Asia      | Biryusa At Biryusinsk   | Biryusa    | Yenisei     | G1538     | SHI       | 8331        | 24700                       | 25259                     | 55.97    | 97.78    | 55.95      | 97.55      |
| Russian Federation | Asia      | Abakan At Abaza         | Abakan     | Yenisei     | G1539     | SHI       | 9207        | 14400                       | 14607                     | 52.65    | 90.1     | 52.55      | 89.75      |
| Russian Federation | Asia      | Tuba At Bugurtak        | Tuba       | Yenisei     | G1540     | SHI       | 9252        | 31800                       | 32572                     | 53.8     | 92.87    | 53.75      | 92.85      |
| Russian Federation | Asia      | Kan At Kansk            | Kan        | Yenisei     | G1541     | SHI       | 9337        | 23000                       | 23028                     | 56.22    | 95.7     | 56.15      | 95.75      |
| Russian Federation | Asia      | Bol Shoy Pit At Bryanka | Bol'shoy   | Yenisei     | G1542     | SHI       | 9372        | 15100                       | 15547                     | 59.12    | 93.48    | 59.15      | 93.55      |
| Russian Federation | Asia      | Tembenchy At            | Tembenchy  | Yenisei     | G1543     | SHI       | 9419        | 18900                       | 19076                     | 64.95    | 98.9     | 65.15      | 98.25      |
| Russian Federation | Asia      | Turukhan At Yanov Stan  | Turukhan   | Taz         | G1544     | SHI       | 9425        | 10100                       | 9427                      | 65.98    | 84.27    | 66.35      | 83.45      |
| Russian Federation | Asia      | Norilka At Valek        | Norilka    | Pyasina     | G1545     | SHI       | 9455        | 19800                       | 20845                     | 69.42    | 88.32    | 69.35      | 88.45      |
| Russian Federation | Asia      | Chulyshman At Balukhcha | Chulyshman | Ob          | G1546     | SHI       | 10062       | 16600                       | 16822                     | 51.28    | 87.72    | 51.15      | 87.75      |
| Russian Federation | Asia      | Katun At Tyungur        | Katun'     | Ob          | G1547     | SHI       | 10066       | 13500                       | 13617                     | 50.13    | 86.32    | 50.15      | 86.15      |
| Russian Federation | Asia      | Chumish At Zarinsk      | Chumish    | Ob          | G1548     | SHI       | 10176       | 15900                       | 15953                     | 53.73    | 84.95    | 53.75      | 84.95      |
| Russian Federation | Asia      | Inya Nyzhnyaya At Kaily | Inya       | Ob          | G1549     | SHI       | 10219       | 15700                       | 15818                     | 55.32    | 84.1     | 55.25      | 84.25      |
| Russian Federation | Asia      | Chulym At Balakhta      | Chulym     | Ob          | G1550     | SHI       | 10317       | 14700                       | 14730                     | 55.38    | 91.62    | 55.25      | 91.45      |
| Russian Federation | Asia      | Chaya At Podgoenoye     | Chaya      | Ob          | G1551     | SHI       | 10428       | 25000                       | 25378                     | 57.78    | 82.63    | 57.85      | 82.65      |
| Russian Federation | Asia      | Vasyugan At Sredny      | Vasyugan   | Ob          | G1552     | SHI       | 10478       | 31700                       | 32484                     | 59.22    | 78.22    | 59.15      | 77.65      |
| Russian Federation | Asia      | Tim At Napas            | Tim        | Ob          | G1553     | SHI       | 10489       | 24500                       | 24599                     | 59.85    | 81.95    | 59.85      | 81.95      |
| Russian Federation | Asia      | Bol Shoy Yugan At Ugut  | Bol'shoy   | Ob          | G1554     | SHI       | 10505       | 22100                       | 21701                     | 60.5     | 74.02    | 60.25      | 73.85      |
| Russian Federation | Asia      | Kulunda At Shimolino    | Kulunda    | Ob          | G1555     | SHI       | 10524       | 12300                       | 12969                     | 52.97    | 80.18    | 52.95      | 80.05      |
| Russian Federation | Asia      | Om At Kuibyshev         | Om'        | Ob          | G1556     | SHI       | 11309       | 12200                       | 13199                     | 55.45    | 78.32    | 55.65      | 79.15      |
| Russian Federation | Asia      | Tara At Muromtsevo      | Tara       | Ob          | G1557     | SHI       | 11353       | 16400                       | 16352                     | 56.38    | 75.25    | 56.35      | 75.55      |
| Russian Federation | Asia      | Lyapin At Saran Paul    | Lyapin     | Ob          | G1558     | SHI       | 11548       | 18500                       | 19840                     | 64.25    | 60.95    | 64.25      | 60.95      |
| Russian Federation | Asia      | Poluy At Poluy          | Poluy      | Ob          | G1559     | SHI       | 11558       | 15100                       | 14873                     | 66.03    | 68.73    | 65.85      | 68.85      |
| Russian Federation | Asia      | Pyaku Pur At Tarko Sale | Pyaku      | Pur         | G1560     | SHI       | 11574       | 31400                       | 27814                     | 64.93    | 77.8     | 64.85      | 77.65      |
| Russian Federation | Asia      | Nadym At Nadym          | Nadym      | Nadym       | G1561     | SHI       | 11805       | 48000                       | 49934                     | 65.62    | 72.67    | 65.45      | 72.75      |
| Russian Federation | Asia      | -                       | Lena       | Lena        | G1803     | DFO       | 297         | -                           | 2388600                   | 69.614   | 124.96   | 69.65      | 124.95     |
| Russian Federation | Asia      | -                       | Ob         | Ob          | G1804     | DFO       | 317         | -                           | 634743                    | 59.084   | 80.955   | 59.05      | 80.95      |
| Russian Federation | Asia      | -                       | Ob         | Ob          | G1805     | DFO       | 318         | -                           | 773954                    | 59.894   | 78.975   | 59.85      | 78.95      |
| Russian Federation | Asia      | -                       | Ob         | Ob          | G1806     | DFO       | 320         | -                           | 888992                    | 61.064   | 75.735   | 61.05      | 75.75      |
| Russian Federation | Asia      | -                       | Jenisei    | Yenisei     | G1807     | DFO       | 421         | -                           | 2552610                   | 66.104   | 87.435   | 66.15      | 87.45      |
| Russian Federation | Asia      | -                       | Pur        | Pur         | G1808     | DFO       | 435         | -                           | 64737                     | 65.384   | 77.985   | 65.35      | 77.95      |
| Russian Federation | Asia      | -                       | -          | -           | G2005     | Synthetic | -           | -                           | 8427                      | -        | -        | 75.55      | 99.25      |
| Russian Federation | Asia      | -                       | -          | -           | G2006     | Synthetic | -           | -                           | 20090                     | -        | -        | 75.45      | 99.25      |
| Russian Federation | Asia      | -                       | -          | -           | G2007     | Synthetic | -           | -                           | 5264                      | -        | -        | 75.35      | 97.35      |
| Russian Federation | Asia      | -                       | -          | -           | G2008     | Synthetic | -           | -                           | 11120                     | -        | -        | 75.25      | 97.45      |
| Russian Federation | Asia      | -                       | -          | -           | G2009     | Synthetic | -           | -                           | 4405                      | -        | -        | 75.15      | 107.15     |
| Russian Federation | Asia      | -                       | -          | -           | G2010     | Synthetic | -           | -                           | 7270                      | -        | -        | 74.95      | 106.35     |
| Russian Federation | Asia      | -                       | -          | -           | G2011     | Synthetic | -           | -                           | 8566                      | -        | -        | 74.95      | 106.55     |
| Russian Federation | Asia      | -                       | -          | -           | G2012     | Synthetic | -           | -                           | 47637                     | -        | -        | 74.45      | 100.35     |



| Country            | Continent | Station Name | River Name | River Basin | GloFAS ID | Provider  | Provider ID | Catchment Area Provided km² | Catchment Area GloFAS km² | LAT Prov | LON Prov | LAT GloFAS | LON GloFAS |
|--------------------|-----------|--------------|------------|-------------|-----------|-----------|-------------|-----------------------------|---------------------------|----------|----------|------------|------------|
| Russian Federation | Asia      | -            | -          | -           | G2013     | Synthetic | -           | -                           | 9147                      | -        | -        | 73.45      | 91.15      |
| Russian Federation | Asia      | -            | -          | -           | G2014     | Synthetic | -           | -                           | 107545                    | -        | -        | 73.35      | 91.35      |
| Russian Federation | Asia      | -            | -          | -           | G2015     | Synthetic | -           | -                           | 6121                      | -        | -        | 73.35      | 93.05      |
| Russian Federation | Asia      | -            | -          | -           | G2016     | Synthetic | -           | -                           | 116932                    | -        | -        | 73.25      | 90.95      |
| Russian Federation | Asia      | -            | -          | -           | G2017     | Synthetic | -           | -                           | 97993                     | -        | -        | 73.25      | 93.05      |
| Russian Federation | Asia      | -            | -          | -           | G2018     | Synthetic | -           | -                           | 86070                     | -        | -        | 73.25      | 94.05      |
| Russian Federation | Asia      | -            | -          | -           | G2019     | Synthetic | -           | -                           | 69502                     | -        | -        | 73.25      | 95.45      |
| Russian Federation | Asia      | -            | -          | -           | G2020     | Synthetic | -           | -                           | 126921                    | -        | -        | 73.15      | 90.95      |
| Russian Federation | Asia      | -            | -          | -           | G2021     | Synthetic | -           | -                           | 7343                      | -        | -        | 73.15      | 94.05      |
| Russian Federation | Asia      | -            | -          | -           | G2022     | Synthetic | -           | -                           | 13157                     | -        | -        | 73.15      | 95.45      |
| Russian Federation | Asia      | -            | -          | -           | G2023     | Synthetic | -           | -                           | 27581                     | -        | -        | 72.95      | 86.65      |
| Russian Federation | Asia      | -            | -          | -           | G2024     | Synthetic | -           | -                           | 256667                    | -        | -        | 72.95      | 86.85      |
| Russian Federation | Asia      | -            | -          | -           | G2025     | Synthetic | -           | -                           | 226296                    | -        | -        | 72.95      | 119.95     |
| Russian Federation | Asia      | -            | -          | -           | G2026     | Synthetic | -           | -                           | 14370                     | -        | -        | 72.85      | 91.35      |
| Russian Federation | Asia      | -            | -          | -           | G2027     | Synthetic | -           | -                           | 8417                      | -        | -        | 72.85      | 116.15     |
| Russian Federation | Asia      | -            | -          | -           | G2028     | Synthetic | -           | -                           | 10863                     | -        | -        | 72.85      | 119.85     |
| Russian Federation | Asia      | -            | -          | -           | G2029     | Synthetic | -           | -                           | 110644                    | -        | -        | 72.75      | 91.25      |
| Russian Federation | Asia      | -            | -          | -           | G2030     | Synthetic | -           | -                           | 4720                      | -        | -        | 72.75      | 101.05     |
| Russian Federation | Asia      | -            | -          | -           | G2031     | Synthetic | -           | -                           | 12827                     | -        | -        | 72.65      | 101.05     |
| Russian Federation | Asia      | -            | -          | -           | G2032     | Synthetic | -           | -                           | 313228                    | -        | -        | 72.45      | 103.85     |
| Russian Federation | Asia      | -            | -          | -           | G2033     | Synthetic | -           | -                           | 4933                      | -        | -        | 72.35      | 85.95      |
| Russian Federation | Asia      | -            | -          | -           | G2034     | Synthetic | -           | -                           | 22104                     | -        | -        | 72.35      | 103.05     |
| Russian Federation | Asia      | -            | -          | -           | G2035     | Synthetic | -           | -                           | 4569                      | -        | -        | 72.35      | 103.95     |
| Russian Federation | Asia      | -            | -          | -           | G2036     | Synthetic | -           | -                           | 8606                      | -        | -        | 72.35      | 126.55     |
| Russian Federation | Asia      | -            | -          | -           | G2037     | Synthetic | -           | -                           | 7939                      | -        | -        | 72.25      | 85.45      |
| Russian Federation | Asia      | -            | -          | -           | G2038     | Synthetic | -           | -                           | 15611                     | -        | -        | 72.25      | 85.75      |
| Russian Federation | Asia      | -            | -          | -           | G2039     | Synthetic | -           | -                           | 4590                      | -        | -        | 72.25      | 92.25      |
| Russian Federation | Asia      | -            | -          | -           | G2040     | Synthetic | -           | -                           | 8039                      | -        | -        | 72.25      | 92.45      |
| Russian Federation | Asia      | -            | -          | -           | G2041     | Synthetic | -           | -                           | 289544                    | -        | -        | 72.25      | 103.05     |
| Russian Federation | Asia      | -            | -          | -           | G2042     | Synthetic | -           | -                           | 6752                      | -        | -        | 72.15      | 85.45      |
| Russian Federation | Asia      | -            | -          | -           | G2043     | Synthetic | -           | -                           | 14460                     | -        | -        | 72.15      | 110.45     |
| Russian Federation | Asia      | -            | -          | -           | G2044     | Synthetic | -           | -                           | 26702                     | -        | -        | 72.05      | 110.65     |
| Russian Federation | Asia      | -            | -          | -           | G2045     | Synthetic | -           | -                           | 4709                      | -        | -        | 72.05      | 123.85     |
| Russian Federation | Asia      | -            | -          | -           | G2046     | Synthetic | -           | -                           | 213280                    | -        | -        | 71.95      | 123.65     |
| Russian Federation | Asia      | -            | -          | -           | G2047     | Synthetic | -           | -                           | 100482                    | -        | -        | 71.85      | 89.95      |
| Russian Federation | Asia      | -            | -          | -           | G2048     | Synthetic | -           | -                           | 14537                     | -        | -        | 71.85      | 110.55     |
| Russian Federation | Asia      | -            | -          | -           | G2049     | Synthetic | -           | -                           | 11442                     | -        | -        | 71.85      | 110.75     |
| Russian Federation | Asia      | -            | -          | -           | G2050     | Synthetic | -           | -                           | 4519                      | -        | -        | 71.75      | 102.05     |
| Russian Federation | Asia      | -            | -          | -           | G2051     | Synthetic | -           | -                           | 18273                     | -        | -        | 71.75      | 114.35     |

| Country            | Continent | Station Name | River Name | River Basin | GloFAS ID | Provider  | Provider ID | Catchment Area Provided km² | Catchment Area GloFAS km² | LAT Prov | LON Prov | LAT GloFAS | LON GloFAS |
|--------------------|-----------|--------------|------------|-------------|-----------|-----------|-------------|-----------------------------|---------------------------|----------|----------|------------|------------|
| Russian Federation | Asia      | -            | -          | -           | G2052     | Synthetic | -           | -                           | 15880                     | -        | -        | 71.75      | 123.55     |
| Russian Federation | Asia      | -            | -          | -           | G2053     | Synthetic | -           | -                           | 4406                      | -        | -        | 71.65      | 88.55      |
| Russian Federation | Asia      | -            | -          | -           | G2054     | Synthetic | -           | -                           | 192362                    | -        | -        | 71.65      | 123.55     |
| Russian Federation | Asia      | -            | -          | -           | G2055     | Synthetic | -           | -                           | 8774                      | -        | -        | 71.55      | 88.55      |
| Russian Federation | Asia      | -            | -          | -           | G2056     | Synthetic | -           | -                           | 7526                      | -        | -        | 71.45      | 88.65      |
| Russian Federation | Asia      | -            | -          | -           | G2057     | Synthetic | -           | -                           | 16822                     | -        | -        | 71.45      | 89.05      |
| Russian Federation | Asia      | -            | -          | -           | G2058     | Synthetic | -           | -                           | 80139                     | -        | -        | 71.35      | 89.15      |
| Russian Federation | Asia      | -            | -          | -           | G2059     | Synthetic | -           | -                           | 168415                    | -        | -        | 71.35      | 103.05     |
| Russian Federation | Asia      | -            | -          | -           | G2060     | Synthetic | -           | -                           | 8269                      | -        | -        | 71.35      | 103.15     |
| Russian Federation | Asia      | -            | -          | -           | G2061     | Synthetic | -           | -                           | 35116                     | -        | -        | 71.35      | 144.45     |
| Russian Federation | Asia      | -            | -          | -           | G2062     | Synthetic | -           | -                           | 62728                     | -        | -        | 71.25      | 99.35      |
| Russian Federation | Asia      | -            | -          | -           | G2063     | Synthetic | -           | -                           | 29770                     | -        | -        | 71.25      | 99.55      |
| Russian Federation | Asia      | -            | -          | -           | G2064     | Synthetic | -           | -                           | 18012                     | -        | -        | 71.15      | 92.85      |
| Russian Federation | Asia      | -            | -          | -           | G2065     | Synthetic | -           | -                           | 4581                      | -        | -        | 71.15      | 135.95     |
| Russian Federation | Asia      | -            | -          | -           | G2066     | Synthetic | -           | -                           | 31030                     | -        | -        | 71.05      | 91.55      |
| Russian Federation | Asia      | -            | -          | -           | G2067     | Synthetic | -           | -                           | 7944                      | -        | -        | 71.05      | 92.85      |
| Russian Federation | Asia      | -            | -          | -           | G2068     | Synthetic | -           | -                           | 244397                    | -        | -        | 71.05      | 136.05     |
| Russian Federation | Asia      | -            | -          | -           | G2069     | Synthetic | -           | -                           | 9288                      | -        | -        | 70.95      | 95.35      |
| Russian Federation | Asia      | -            | -          | -           | G2070     | Synthetic | -           | -                           | 16522                     | -        | -        | 70.95      | 144.25     |
| Russian Federation | Asia      | -            | -          | -           | G2071     | Synthetic | -           | -                           | 17102                     | -        | -        | 70.95      | 144.45     |
| Russian Federation | Asia      | -            | -          | -           | G2072     | Synthetic | -           | -                           | 355908                    | -        | -        | 70.95      | 150.75     |
| Russian Federation | Asia      | -            | -          | -           | G2073     | Synthetic | -           | -                           | 39107                     | -        | -        | 70.85      | 89.75      |
| Russian Federation | Asia      | -            | -          | -           | G2074     | Synthetic | -           | -                           | 38523                     | -        | -        | 70.85      | 89.95      |
| Russian Federation | Asia      | -            | -          | -           | G2075     | Synthetic | -           | -                           | 31230                     | -        | -        | 70.85      | 95.15      |
| Russian Federation | Asia      | -            | -          | -           | G2076     | Synthetic | -           | -                           | 44924                     | -        | -        | 70.85      | 97.45      |
| Russian Federation | Asia      | -            | -          | -           | G2077     | Synthetic | -           | -                           | 52913                     | -        | -        | 70.85      | 97.85      |
| Russian Federation | Asia      | -            | -          | -           | G2078     | Synthetic | -           | -                           | 4921                      | -        | -        | 70.85      | 112.55     |
| Russian Federation | Asia      | -            | -          | -           | G2079     | Synthetic | -           | -                           | 5931                      | -        | -        | 70.85      | 145.15     |
| Russian Federation | Asia      | -            | -          | -           | G2080     | Synthetic | -           | -                           | 6670                      | -        | -        | 70.85      | 150.75     |
| Russian Federation | Asia      | -            | -          | -           | G2082     | Synthetic | -           | -                           | 7498                      | -        | -        | 70.75      | 97.45      |
| Russian Federation | Asia      | -            | -          | -           | G2083     | Synthetic | -           | -                           | 5141                      | -        | -        | 70.75      | 98.05      |
| Russian Federation | Asia      | -            | -          | -           | G2084     | Synthetic | -           | -                           | 27660                     | -        | -        | 70.75      | 112.55     |
| Russian Federation | Asia      | -            | -          | -           | G2085     | Synthetic | -           | -                           | 33075                     | -        | -        | 70.75      | 113.25     |
| Russian Federation | Asia      | -            | -          | -           | G2086     | Synthetic | -           | -                           | 26993                     | -        | -        | 70.75      | 113.35     |
| Russian Federation | Asia      | -            | -          | -           | G2087     | Synthetic | -           | -                           | 34526                     | -        | -        | 70.75      | 133.35     |
| Russian Federation | Asia      | -            | -          | -           | G2088     | Synthetic | -           | -                           | 5365                      | -        | -        | 70.75      | 142.95     |
| Russian Federation | Asia      | -            | -          | -           | G2089     | Synthetic | -           | -                           | 10189                     | -        | -        | 70.75      | 145.15     |
| Russian Federation | Asia      | -            | -          | -           | G2090     | Synthetic | -           | -                           | 4676                      | -        | -        | 70.75      | 148.05     |
| Russian Federation | Asia      | -            | -          | -           | G2091     | Synthetic | -           | -                           | 26717                     | -        | -        | 70.65      | 103.45     |

| Country            | Continent | Station Name | River Name | River Basin | GloFAS ID | Provider  | Provider ID | Catchment Area Provided km² | Catchment Area GloFAS km² | LAT Prov | LON Prov | LAT GloFAS | LON GloFAS |
|--------------------|-----------|--------------|------------|-------------|-----------|-----------|-------------|-----------------------------|---------------------------|----------|----------|------------|------------|
| Russian Federation | Asia      | -            | -          | -           | G2092     | Synthetic | -           | -                           | 10827                     | -        | -        | 70.65      | 105.35     |
| Russian Federation | Asia      | -            | -          | -           | G2093     | Synthetic | -           | -                           | 7451                      | -        | -        | 70.65      | 142.95     |
| Russian Federation | Asia      | -            | -          | -           | G2094     | Synthetic | -           | -                           | 341821                    | -        | -        | 70.65      | 148.05     |
| Russian Federation | Asia      | -            | -          | -           | G2095     | Synthetic | -           | -                           | 134233                    | -        | -        | 70.55      | 103.35     |
| Russian Federation | Asia      | -            | -          | -           | G2096     | Synthetic | -           | -                           | 17192                     | -        | -        | 70.55      | 104.45     |
| Russian Federation | Asia      | -            | -          | -           | G2097     | Synthetic | -           | -                           | 5418                      | -        | -        | 70.55      | 105.35     |
| Russian Federation | Asia      | -            | -          | -           | G2098     | Synthetic | -           | -                           | 177896                    | -        | -        | 70.55      | 121.35     |
| Russian Federation | Asia      | -            | -          | -           | G2099     | Synthetic | -           | -                           | 5461                      | -        | -        | 70.45      | 88.95      |
| Russian Federation | Asia      | -            | -          | -           | G2100     | Synthetic | -           | -                           | 8036                      | -        | -        | 70.45      | 104.45     |
| Russian Federation | Asia      | -            | -          | -           | G2101     | Synthetic | -           | -                           | 172235                    | -        | -        | 70.45      | 120.45     |
| Russian Federation | Asia      | -            | -          | -           | G2102     | Synthetic | -           | -                           | 31673                     | -        | -        | 70.35      | 88.75      |
| Russian Federation | Asia      | -            | -          | -           | G2103     | Synthetic | -           | -                           | 6427                      | -        | -        | 70.35      | 125.95     |
| Russian Federation | Asia      | -            | -          | -           | G2104     | Synthetic | -           | -                           | 21171                     | -        | -        | 70.25      | 81.55      |
| Russian Federation | Asia      | -            | -          | -           | G2105     | Synthetic | -           | -                           | 2406790                   | -        | -        | 70.25      | 125.95     |
| Russian Federation | Asia      | -            | -          | -           | G2106     | Synthetic | -           | -                           | 4765                      | -        | -        | 70.15      | 81.55      |
| Russian Federation | Asia      | -            | -          | -           | G2107     | Synthetic | -           | -                           | 11204                     | -        | -        | 70.15      | 95.75      |
| Russian Federation | Asia      | -            | -          | -           | G2108     | Synthetic | -           | -                           | 10646                     | -        | -        | 70.15      | 95.85      |
| Russian Federation | Asia      | -            | -          | -           | G2111     | Synthetic | -           | -                           | 7245                      | -        | -        | 70.05      | 100.95     |
| Russian Federation | Asia      | -            | -          | -           | G2112     | Synthetic | -           | -                           | 13907                     | -        | -        | 69.95      | 101.15     |
| Russian Federation | Asia      | -            | -          | -           | G2113     | Synthetic | -           | -                           | 9143                      | -        | -        | 69.95      | 132.45     |
| Russian Federation | Asia      | -            | -          | -           | G2115     | Synthetic | -           | -                           | 17340                     | -        | -        | 69.85      | 85.25      |
| Russian Federation | Asia      | -            | -          | -           | G2116     | Synthetic | -           | -                           | 6143                      | -        | -        | 69.85      | 125.35     |
| Russian Federation | Asia      | -            | -          | -           | G2117     | Synthetic | -           | -                           | 15771                     | -        | -        | 69.85      | 132.45     |
| Russian Federation | Asia      | -            | -          | -           | G2118     | Synthetic | -           | -                           | 73188                     | -        | -        | 69.85      | 157.65     |
| Russian Federation | Asia      | -            | -          | -           | G2120     | Synthetic | -           | -                           | 2709310                   | -        | -        | 69.75      | 85.25      |
| Russian Federation | Asia      | -            | -          | -           | G2121     | Synthetic | -           | -                           | 13287                     | -        | -        | 69.75      | 125.15     |
| Russian Federation | Asia      | -            | -          | -           | G2122     | Synthetic | -           | -                           | 6910                      | -        | -        | 69.75      | 125.35     |
| Russian Federation | Asia      | -            | -          | -           | G2123     | Synthetic | -           | -                           | 13763                     | -        | -        | 69.75      | 157.65     |
| Russian Federation | Asia      | -            | -          | -           | G2124     | Synthetic | -           | -                           | 6006                      | -        | -        | 69.65      | 114.45     |
| Russian Federation | Asia      | -            | -          | -           | G2125     | Synthetic | -           | -                           | 8820                      | -        | -        | 69.65      | 118.05     |
| Russian Federation | Asia      | -            | -          | -           | G2126     | Synthetic | -           | -                           | 9464                      | -        | -        | 69.65      | 147.25     |
| Russian Federation | Asia      | -            | -          | -           | G2127     | Synthetic | -           | -                           | 18385                     | -        | -        | 69.55      | 84.15      |
| Russian Federation | Asia      | -            | -          | -           | G2128     | Synthetic | -           | -                           | 9683                      | -        | -        | 69.55      | 114.35     |
| Russian Federation | Asia      | -            | -          | -           | G2129     | Synthetic | -           | -                           | 148066                    | -        | -        | 69.55      | 118.05     |
| Russian Federation | Asia      | -            | -          | -           | G2130     | Synthetic | -           | -                           | 142327                    | -        | -        | 69.55      | 118.25     |
| Russian Federation | Asia      | -            | -          | -           | G2131     | Synthetic | -           | -                           | 30934                     | -        | -        | 69.55      | 124.75     |
| Russian Federation | Asia      | -            | -          | -           | G2132     | Synthetic | -           | -                           | 323710                    | -        | -        | 69.55      | 147.45     |
| Russian Federation | Asia      | -            | -          | -           | G2133     | Synthetic | -           | -                           | 28464                     | -        | -        | 69.55      | 155.05     |
| Russian Federation | Asia      | -            | -          | -           | G2139     | Synthetic | -           | -                           | 6431                      | -        | -        | 69.45      | 84.05      |

| Country            | Continent | Station Name | River Name | River Basin | GloFAS ID | Provider  | Provider ID | Catchment Area Provided km² | Catchment Area GloFAS km² | LAT Prov | LON Prov | LAT GloFAS | LON GloFAS |
|--------------------|-----------|--------------|------------|-------------|-----------|-----------|-------------|-----------------------------|---------------------------|----------|----------|------------|------------|
| Russian Federation | Asia      | -            | -          | -           | G2140     | Synthetic | -           | -                           | 6856                      | -        | -        | 69.45      | 86.15      |
| Russian Federation | Asia      | -            | -          | -           | G2141     | Synthetic | -           | -                           | 5550                      | -        | -        | 69.45      | 118.05     |
| Russian Federation | Asia      | -            | -          | -           | G2142     | Synthetic | -           | -                           | 318880                    | -        | -        | 69.45      | 147.65     |
| Russian Federation | Asia      | -            | -          | -           | G2143     | Synthetic | -           | -                           | 32520                     | -        | -        | 69.45      | 154.85     |
| Russian Federation | Asia      | -            | -          | -           | G2144     | Synthetic | -           | -                           | 2700760                   | -        | -        | 69.35      | 85.95      |
| Russian Federation | Asia      | -            | -          | -           | G2145     | Synthetic | -           | -                           | 9528                      | -        | -        | 69.35      | 122.75     |
| Russian Federation | Asia      | -            | -          | -           | G2146     | Synthetic | -           | -                           | 5374                      | -        | -        | 69.25      | 89.25      |
| Russian Federation | Asia      | -            | -          | -           | G2147     | Synthetic | -           | -                           | 8716                      | -        | -        | 69.25      | 175.15     |
| Russian Federation | Asia      | -            | -          | -           | G2148     | Synthetic | -           | -                           | 10528                     | -        | -        | 69.15      | 122.75     |
| Russian Federation | Asia      | -            | -          | -           | G2149     | Synthetic | -           | -                           | 8842                      | -        | -        | 69.15      | 174.95     |
| Russian Federation | Asia      | -            | -          | -           | G2150     | Synthetic | -           | -                           | 8848                      | -        | -        | 69.05      | 103.55     |
| Russian Federation | Asia      | -            | -          | -           | G2151     | Synthetic | -           | -                           | 112979                    | -        | -        | 69.05      | 103.95     |
| Russian Federation | Asia      | -            | -          | -           | G2152     | Synthetic | -           | -                           | 6629                      | -        | -        | 69.05      | 104.15     |
| Russian Federation | Asia      | -            | -          | -           | G2153     | Synthetic | -           | -                           | 6586                      | -        | -        | 69.05      | 147.55     |
| Russian Federation | Asia      | -            | -          | -           | G2154     | Synthetic | -           | -                           | 5968                      | -        | -        | 69.05      | 151.55     |
| Russian Federation | Asia      | -            | -          | -           | G2158     | Synthetic | -           | -                           | 103601                    | -        | -        | 68.95      | 103.55     |
| Russian Federation | Asia      | -            | -          | -           | G2159     | Synthetic | -           | -                           | 309429                    | -        | -        | 68.95      | 147.45     |
| Russian Federation | Asia      | -            | -          | -           | G2160     | Synthetic | -           | -                           | 12847                     | -        | -        | 68.95      | 151.65     |
| Russian Federation | Asia      | -            | -          | -           | G2162     | Synthetic | -           | -                           | 6222                      | -        | -        | 68.85      | 65.05      |
| Russian Federation | Asia      | -            | -          | -           | G2163     | Synthetic | -           | -                           | 7720                      | -        | -        | 68.85      | 80.35      |
| Russian Federation | Asia      | -            | -          | -           | G2165     | Synthetic | -           | -                           | 33151                     | -        | -        | 68.75      | 103.65     |
| Russian Federation | Asia      | -            | -          | -           | G2166     | Synthetic | -           | -                           | 12438                     | -        | -        | 68.75      | 124.05     |
| Russian Federation | Asia      | -            | -          | -           | G2167     | Synthetic | -           | -                           | 43305                     | -        | -        | 68.75      | 134.35     |
| Russian Federation | Asia      | -            | -          | -           | G2169     | Synthetic | -           | -                           | 69723                     | -        | -        | 68.65      | 103.45     |
| Russian Federation | Asia      | -            | -          | -           | G2170     | Synthetic | -           | -                           | 2338830                   | -        | -        | 68.65      | 123.95     |
| Russian Federation | Asia      | -            | -          | -           | G2171     | Synthetic | -           | -                           | 171921                    | -        | -        | 68.65      | 134.55     |
| Russian Federation | Asia      | -            | -          | -           | G2172     | Synthetic | -           | -                           | 7739                      | -        | -        | 68.65      | 136.45     |
| Russian Federation | Asia      | -            | -          | -           | G2173     | Synthetic | -           | -                           | 6918                      | -        | -        | 68.65      | 163.95     |
| Russian Federation | Asia      | -            | -          | -           | G2174     | Synthetic | -           | -                           | 25738                     | -        | -        | 68.65      | 170.75     |
| Russian Federation | Asia      | -            | -          | -           | G2175     | Synthetic | -           | -                           | 14876                     | -        | -        | 68.65      | 171.45     |
| Russian Federation | Asia      | -            | -          | -           | G2176     | Synthetic | -           | -                           | 8151                      | -        | -        | 68.55      | 111.85     |
| Russian Federation | Asia      | -            | -          | -           | G2177     | Synthetic | -           | -                           | 9978                      | -        | -        | 68.55      | 143.85     |
| Russian Federation | Asia      | -            | -          | -           | G2178     | Synthetic | -           | -                           | 5122                      | -        | -        | 68.55      | 163.85     |
| Russian Federation | Asia      | -            | -          | -           | G2179     | Synthetic | -           | -                           | 7290                      | -        | -        | 68.55      | 170.55     |
| Russian Federation | Asia      | -            | -          | -           | G2180     | Synthetic | -           | -                           | 15772                     | -        | -        | 68.45      | 78.95      |
| Russian Federation | Asia      | -            | -          | -           | G2181     | Synthetic | -           | -                           | 9918                      | -        | -        | 68.45      | 94.25      |
| Russian Federation | Asia      | -            | -          | -           | G2182     | Synthetic | -           | -                           | 6331                      | -        | -        | 68.45      | 110.75     |
| Russian Federation | Asia      | -            | -          | -           | G2183     | Synthetic | -           | -                           | 43005                     | -        | -        | 68.45      | 111.85     |
| Russian Federation | Asia      | -            | -          | -           | G2184     | Synthetic | -           | -                           | 51352                     | -        | -        | 68.45      | 112.05     |

| Country            | Continent | Station Name | River Name | River Basin | GloFAS ID | Provider  | Provider ID | Catchment Area Provided km² | Catchment Area GloFAS km² | LAT Prov | LON Prov | LAT GloFAS | LON GloFAS |
|--------------------|-----------|--------------|------------|-------------|-----------|-----------|-------------|-----------------------------|---------------------------|----------|----------|------------|------------|
| Russian Federation | Asia      | -            | -          | -           | G2185     | Synthetic | -           | -                           | 24941                     | -        | -        | 68.45      | 143.85     |
| Russian Federation | Asia      | -            | -          | -           | G2186     | Synthetic | -           | -                           | 574256                    | -        | -        | 68.45      | 160.55     |
| Russian Federation | Asia      | -            | -          | -           | G2187     | Synthetic | -           | -                           | 116156                    | -        | -        | 68.45      | 160.75     |
| Russian Federation | Asia      | -            | -          | -           | G2188     | Synthetic | -           | -                           | 53405                     | -        | -        | 68.45      | 160.85     |
| Russian Federation | Asia      | -            | -          | -           | G2189     | Synthetic | -           | -                           | 9783                      | -        | -        | 68.45      | 171.35     |
| Russian Federation | Asia      | -            | -          | -           | G2193     | Synthetic | -           | -                           | 5436                      | -        | -        | 68.35      | 79.05      |
| Russian Federation | Asia      | -            | -          | -           | G2194     | Synthetic | -           | -                           | 22448                     | -        | -        | 68.35      | 94.25      |
| Russian Federation | Asia      | -            | -          | -           | G2195     | Synthetic | -           | -                           | 14814                     | -        | -        | 68.35      | 109.75     |
| Russian Federation | Asia      | -            | -          | -           | G2196     | Synthetic | -           | -                           | 43780                     | -        | -        | 68.35      | 112.25     |
| Russian Federation | Asia      | -            | -          | -           | G2197     | Synthetic | -           | -                           | 100308                    | -        | -        | 68.35      | 114.85     |
| Russian Federation | Asia      | -            | -          | -           | G2198     | Synthetic | -           | -                           | 2332930                   | -        | -        | 68.35      | 123.85     |
| Russian Federation | Asia      | -            | -          | -           | G2199     | Synthetic | -           | -                           | 5560                      | -        | -        | 68.35      | 123.95     |
| Russian Federation | Asia      | -            | -          | -           | G2200     | Synthetic | -           | -                           | 153233                    | -        | -        | 68.35      | 134.85     |
| Russian Federation | Asia      | -            | -          | -           | G2201     | Synthetic | -           | -                           | 17756                     | -        | -        | 68.35      | 134.95     |
| Russian Federation | Asia      | -            | -          | -           | G2202     | Synthetic | -           | -                           | 42020                     | -        | -        | 68.35      | 145.75     |
| Russian Federation | Asia      | -            | -          | -           | G2203     | Synthetic | -           | -                           | 13900                     | -        | -        | 68.35      | 145.95     |
| Russian Federation | Asia      | -            | -          | -           | G2204     | Synthetic | -           | -                           | 62554                     | -        | -        | 68.35      | 160.75     |
| Russian Federation | Asia      | -            | -          | -           | G2205     | Synthetic | -           | -                           | 15763                     | -        | -        | 68.25      | 109.75     |
| Russian Federation | Asia      | -            | -          | -           | G2206     | Synthetic | -           | -                           | 34300                     | -        | -        | 68.25      | 110.85     |
| Russian Federation | Asia      | -            | -          | -           | G2207     | Synthetic | -           | -                           | 12965                     | -        | -        | 68.25      | 114.95     |
| Russian Federation | Asia      | -            | -          | -           | G2208     | Synthetic | -           | -                           | 244829                    | -        | -        | 68.25      | 145.75     |
| Russian Federation | Asia      | -            | -          | -           | G2209     | Synthetic | -           | -                           | 56337                     | -        | -        | 68.25      | 160.95     |
| Russian Federation | Asia      | -            | -          | -           | G2210     | Synthetic | -           | -                           | 14108                     | -        | -        | 68.25      | 163.55     |
| Russian Federation | Asia      | -            | -          | -           | G2212     | Synthetic | -           | -                           | 33170                     | -        | -        | 68.15      | 86.55      |
| Russian Federation | Asia      | -            | -          | -           | G2213     | Synthetic | -           | -                           | 57674                     | -        | -        | 68.15      | 134.75     |
| Russian Federation | Asia      | -            | -          | -           | G2214     | Synthetic | -           | -                           | 95162                     | -        | -        | 68.15      | 134.85     |
| Russian Federation | Asia      | -            | -          | -           | G2215     | Synthetic | -           | -                           | 33215                     | -        | -        | 68.15      | 163.55     |
| Russian Federation | Asia      | -            | -          | -           | G2218     | Synthetic | -           | -                           | 2659140                   | -        | -        | 68.05      | 86.35      |
| Russian Federation | Asia      | -            | -          | -           | G2219     | Synthetic | -           | -                           | 9798                      | -        | -        | 68.05      | 122.85     |
| Russian Federation | Asia      | -            | -          | -           | G2220     | Synthetic | -           | -                           | 39316                     | -        | -        | 68.05      | 123.15     |
| Russian Federation | Asia      | -            | -          | -           | G2221     | Synthetic | -           | -                           | 2314070                   | -        | -        | 68.05      | 123.25     |
| Russian Federation | Asia      | -            | -          | -           | G2222     | Synthetic | -           | -                           | 17671                     | -        | -        | 68.05      | 123.35     |
| Russian Federation | Asia      | -            | -          | -           | G2224     | Synthetic | -           | -                           | 11877                     | -        | -        | 67.95      | 87.65      |
| Russian Federation | Asia      | -            | -          | -           | G2225     | Synthetic | -           | -                           | 12058                     | -        | -        | 67.95      | 102.15     |
| Russian Federation | Asia      | -            | -          | -           | G2226     | Synthetic | -           | -                           | 60052                     | -        | -        | 67.95      | 102.55     |
| Russian Federation | Asia      | -            | -          | -           | G2227     | Synthetic | -           | -                           | 5649                      | -        | -        | 67.95      | 120.35     |
| Russian Federation | Asia      | -            | -          | -           | G2228     | Synthetic | -           | -                           | 28665                     | -        | -        | 67.95      | 122.75     |
| Russian Federation | Asia      | -            | -          | -           | G2229     | Synthetic | -           | -                           | 2274700                   | -        | -        | 67.95      | 123.15     |
| Russian Federation | Asia      | -            | -          | -           | G2230     | Synthetic | -           | -                           | 5195                      | -        | -        | 67.95      | 134.55     |

| Country            | Continent | Station Name | River Name | River Basin | GloFAS ID | Provider  | Provider ID | Catchment Area Provided km² | Catchment Area GloFAS km² | LAT Prov | LON Prov | LAT GloFAS | LON GloFAS |
|--------------------|-----------|--------------|------------|-------------|-----------|-----------|-------------|-----------------------------|---------------------------|----------|----------|------------|------------|
| Russian Federation | Asia      | -            | -          | -           | G2231     | Synthetic | -           | -                           | 52129                     | -        | -        | 67.95      | 134.75     |
| Russian Federation | Asia      | -            | -          | -           | G2232     | Synthetic | -           | -                           | 33277                     | -        | -        | 67.95      | 144.55     |
| Russian Federation | Asia      | -            | -          | -           | G2233     | Synthetic | -           | -                           | 47643                     | -        | -        | 67.85      | 102.15     |
| Russian Federation | Asia      | -            | -          | -           | G2234     | Synthetic | -           | -                           | 18331                     | -        | -        | 67.85      | 120.35     |
| Russian Federation | Asia      | -            | -          | -           | G2235     | Synthetic | -           | -                           | 21327                     | -        | -        | 67.85      | 135.55     |
| Russian Federation | Asia      | -            | -          | -           | G2236     | Synthetic | -           | -                           | 197449                    | -        | -        | 67.85      | 144.55     |
| Russian Federation | Asia      | -            | -          | -           | G2237     | Synthetic | -           | -                           | 231280                    | -        | -        | 67.85      | 144.95     |
| Russian Federation | Asia      | -            | -          | -           | G2238     | Synthetic | -           | -                           | 5212                      | -        | -        | 67.75      | 86.15      |
| Russian Federation | Asia      | -            | -          | -           | G2239     | Synthetic | -           | -                           | 72684                     | -        | -        | 67.75      | 135.55     |
| Russian Federation | Asia      | -            | -          | -           | G2240     | Synthetic | -           | -                           | 8926                      | -        | -        | 67.75      | 145.05     |
| Russian Federation | Asia      | -            | -          | -           | G2242     | Synthetic | -           | -                           | 2265270                   | -        | -        | 67.65      | 123.15     |
| Russian Federation | Asia      | -            | -          | -           | G2243     | Synthetic | -           | -                           | 7361                      | -        | -        | 67.65      | 130.75     |
| Russian Federation | Asia      | -            | -          | -           | G2244     | Synthetic | -           | -                           | 399413                    | -        | -        | 67.65      | 155.35     |
| Russian Federation | Asia      | -            | -          | -           | G2247     | Synthetic | -           | -                           | 41335                     | -        | -        | 67.55      | 101.65     |
| Russian Federation | Asia      | -            | -          | -           | G2248     | Synthetic | -           | -                           | 18702                     | -        | -        | 67.55      | 130.75     |
| Russian Federation | Asia      | -            | -          | -           | G2249     | Synthetic | -           | -                           | 30502                     | -        | -        | 67.55      | 155.35     |
| Russian Federation | Asia      | -            | -          | -           | G2252     | Synthetic | -           | -                           | 41197                     | -        | -        | 67.45      | 90.95      |
| Russian Federation | Asia      | -            | -          | -           | G2256     | Synthetic | -           | -                           | 17320                     | -        | -        | 67.35      | 90.95      |
| Russian Federation | Asia      | -            | -          | -           | G2257     | Synthetic | -           | -                           | 15800                     | -        | -        | 67.35      | 103.95     |
| Russian Federation | Asia      | -            | -          | -           | G2258     | Synthetic | -           | -                           | 5839                      | -        | -        | 67.35      | 104.15     |
| Russian Federation | Asia      | -            | -          | -           | G2259     | Synthetic | -           | -                           | 19757                     | -        | -        | 67.35      | 155.55     |
| Russian Federation | Asia      | -            | -          | -           | G2262     | Synthetic | -           | -                           | 8850                      | -        | -        | 67.25      | 123.15     |
| Russian Federation | Asia      | -            | -          | -           | G2263     | Synthetic | -           | -                           | 2255810                   | -        | -        | 67.25      | 123.25     |
| Russian Federation | Asia      | -            | -          | -           | G2264     | Synthetic | -           | -                           | 14244                     | -        | -        | 67.25      | 123.35     |
| Russian Federation | Asia      | -            | -          | -           | G2265     | Synthetic | -           | -                           | 10312                     | -        | -        | 67.25      | 135.45     |
| Russian Federation | Asia      | -            | -          | -           | G2271     | Synthetic | -           | -                           | 5669                      | -        | -        | 67.15      | 81.45      |
| Russian Federation | Asia      | -            | -          | -           | G2272     | Synthetic | -           | -                           | 8925                      | -        | -        | 67.15      | 91.05      |
| Russian Federation | Asia      | -            | -          | -           | G2273     | Synthetic | -           | -                           | 18420                     | -        | -        | 67.15      | 109.85     |
| Russian Federation | Asia      | -            | -          | -           | G2274     | Synthetic | -           | -                           | 2240850                   | -        | -        | 67.15      | 123.35     |
| Russian Federation | Asia      | -            | -          | -           | G2275     | Synthetic | -           | -                           | 58537                     | -        | -        | 67.15      | 135.65     |
| Russian Federation | Asia      | -            | -          | -           | G2276     | Synthetic | -           | -                           | 9413                      | -        | -        | 67.15      | 155.45     |
| Russian Federation | Asia      | -            | -          | -           | G2282     | Synthetic | -           | -                           | 149706                    | -        | -        | 67.05      | 80.95      |
| Russian Federation | Asia      | -            | -          | -           | G2283     | Synthetic | -           | -                           | 23884                     | -        | -        | 67.05      | 100.45     |
| Russian Federation | Asia      | -            | -          | -           | G2284     | Synthetic | -           | -                           | 12548                     | -        | -        | 67.05      | 109.95     |
| Russian Federation | Asia      | -            | -          | -           | G2285     | Synthetic | -           | -                           | 8472                      | -        | -        | 67.05      | 142.45     |
| Russian Federation | Asia      | -            | -          | -           | G2286     | Synthetic | -           | -                           | 18906                     | -        | -        | 67.05      | 152.95     |
| Russian Federation | Asia      | -            | -          | -           | G2289     | Synthetic | -           | -                           | 143206                    | -        | -        | 66.95      | 81.45      |
| Russian Federation | Asia      | -            | -          | -           | G2290     | Synthetic | -           | -                           | 7107                      | -        | -        | 66.95      | 90.95      |
| Russian Federation | Asia      | -            | -          | -           | G2291     | Synthetic | -           | -                           | 178323                    | -        | -        | 66.95      | 142.65     |

| Country            | Continent | Station Name | River Name | River Basin | GloFAS ID | Provider  | Provider ID | Catchment Area Provided km² | Catchment Area GloFAS km² | LAT Prov | LON Prov | LAT GloFAS | LON GloFAS |
|--------------------|-----------|--------------|------------|-------------|-----------|-----------|-------------|-----------------------------|---------------------------|----------|----------|------------|------------|
| Russian Federation | Asia      | -            | -          | -           | G2292     | Synthetic | -           | -                           | 371669                    | -        | -        | 66.95      | 152.95     |
| Russian Federation | Asia      | -            | -          | -           | G2293     | Synthetic | -           | -                           | 6525                      | -        | -        | 66.95      | 164.45     |
| Russian Federation | Asia      | -            | -          | -           | G2296     | Synthetic | -           | -                           | 11900                     | -        | -        | 66.85      | 100.65     |
| Russian Federation | Asia      | -            | -          | -           | G2297     | Synthetic | -           | -                           | 6121                      | -        | -        | 66.85      | 163.25     |
| Russian Federation | Asia      | -            | -          | -           | G2298     | Synthetic | -           | -                           | 31122                     | -        | -        | 66.85      | 163.35     |
| Russian Federation | Asia      | -            | -          | -           | G2301     | Synthetic | -           | -                           | 13609                     | -        | -        | 66.75      | 68.65      |
| Russian Federation | Asia      | -            | -          | -           | G2302     | Synthetic | -           | -                           | 47335                     | -        | -        | 66.75      | 136.65     |
| Russian Federation | Asia      | -            | -          | -           | G2303     | Synthetic | -           | -                           | 8654                      | -        | -        | 66.75      | 136.75     |
| Russian Federation | Asia      | -            | -          | -           | G2304     | Synthetic | -           | -                           | 362970                    | -        | -        | 66.75      | 152.55     |
| Russian Federation | Asia      | -            | -          | -           | G2305     | Synthetic | -           | -                           | 6146                      | -        | -        | 66.75      | 152.65     |
| Russian Federation | Asia      | -            | -          | -           | G2306     | Synthetic | -           | -                           | 21136                     | -        | -        | 66.75      | 164.35     |
| Russian Federation | Asia      | -            | -          | -           | G2313     | Synthetic | -           | -                           | 2550200                   | -        | -        | 66.65      | 68.65      |
| Russian Federation | Asia      | -            | -          | -           | G2314     | Synthetic | -           | -                           | 16214                     | -        | -        | 66.65      | 136.35     |
| Russian Federation | Asia      | -            | -          | -           | G2315     | Synthetic | -           | -                           | 6311                      | -        | -        | 66.65      | 159.65     |
| Russian Federation | Asia      | -            | -          | -           | G2326     | Synthetic | -           | -                           | 73002                     | -        | -        | 66.55      | 87.35      |
| Russian Federation | Asia      | -            | -          | -           | G2327     | Synthetic | -           | -                           | 30177                     | -        | -        | 66.55      | 136.45     |
| Russian Federation | Asia      | -            | -          | -           | G2328     | Synthetic | -           | -                           | 355221                    | -        | -        | 66.55      | 151.95     |
| Russian Federation | Asia      | -            | -          | -           | G2329     | Synthetic | -           | -                           | 99620                     | -        | -        | 66.55      | 159.45     |
| Russian Federation | Asia      | -            | -          | -           | G2330     | Synthetic | -           | -                           | 17677                     | -        | -        | 66.55      | 173.95     |
| Russian Federation | Asia      | -            | -          | -           | G2331     | Synthetic | -           | -                           | 10488                     | -        | -        | 66.55      | 174.05     |
| Russian Federation | Asia      | -            | -          | -           | G2340     | Synthetic | -           | -                           | 5800                      | -        | -        | 66.45      | 151.95     |
| Russian Federation | Asia      | -            | -          | -           | G2341     | Synthetic | -           | -                           | 24448                     | -        | -        | 66.45      | 159.55     |
| Russian Federation | Asia      | -            | -          | -           | G2349     | Synthetic | -           | -                           | 2214080                   | -        | -        | 66.35      | 123.75     |
| Russian Federation | Asia      | -            | -          | -           | G2350     | Synthetic | -           | -                           | 16102                     | -        | -        | 66.35      | 123.85     |
| Russian Federation | Asia      | -            | -          | -           | G2351     | Synthetic | -           | -                           | 31588                     | -        | -        | 66.35      | 143.25     |
| Russian Federation | Asia      | -            | -          | -           | G2352     | Synthetic | -           | -                           | 73587                     | -        | -        | 66.35      | 159.35     |
| Russian Federation | Asia      | -            | -          | -           | G2353     | Synthetic | -           | -                           | 12997                     | -        | -        | 66.35      | 173.45     |
| Russian Federation | Asia      | -            | -          | -           | G2354     | Synthetic | -           | -                           | 29864                     | -        | -        | 66.35      | 173.65     |
| Russian Federation | Asia      | -            | -          | -           | G2360     | Synthetic | -           | -                           | 2505600                   | -        | -        | 66.25      | 66.05      |
| Russian Federation | Asia      | -            | -          | -           | G2361     | Synthetic | -           | -                           | 138360                    | -        | -        | 66.25      | 143.25     |
| Russian Federation | Asia      | -            | -          | -           | G2362     | Synthetic | -           | -                           | 24250                     | -        | -        | 66.25      | 150.85     |
| Russian Federation | Asia      | -            | -          | -           | G2371     | Synthetic | -           | -                           | 14789                     | -        | -        | 66.15      | 136.75     |
| Russian Federation | Asia      | -            | -          | -           | G2372     | Synthetic | -           | -                           | 12138                     | -        | -        | 66.15      | 136.85     |
| Russian Federation | Asia      | -            | -          | -           | G2373     | Synthetic | -           | -                           | 323448                    | -        | -        | 66.15      | 150.75     |
| Russian Federation | Asia      | -            | -          | -           | G2379     | Synthetic | -           | -                           | 32671                     | -        | -        | 66.05      | 65.65      |
| Russian Federation | Asia      | -            | -          | -           | G2380     | Synthetic | -           | -                           | 2472450                   | -        | -        | 66.05      | 65.85      |
| Russian Federation | Asia      | -            | -          | -           | G2381     | Synthetic | -           | -                           | 14511                     | -        | -        | 66.05      | 87.25      |
| Russian Federation | Asia      | -            | -          | -           | G2382     | Synthetic | -           | -                           | 5902                      | -        | -        | 66.05      | 131.25     |
| Russian Federation | Asia      | -            | -          | -           | G2383     | Synthetic | -           | -                           | 11575                     | -        | -        | 66.05      | 131.45     |

| Country            | Continent | Station Name | River Name | River Basin | GloFAS ID | Provider  | Provider ID | Catchment Area Provided km² | Catchment Area GloFAS km² | LAT Prov | LON Prov | LAT GloFAS | LON GloFAS |
|--------------------|-----------|--------------|------------|-------------|-----------|-----------|-------------|-----------------------------|---------------------------|----------|----------|------------|------------|
| Russian Federation | Asia      | -            | -          | -           | G2384     | Synthetic | -           | -                           | 17731                     | -        | -        | 66.05      | 144.65     |
| Russian Federation | Asia      | -            | -          | -           | G2392     | Synthetic | -           | -                           | 81014                     | -        | -        | 65.95      | 78.25      |
| Russian Federation | Asia      | -            | -          | -           | G2393     | Synthetic | -           | -                           | 6036                      | -        | -        | 65.95      | 78.35      |
| Russian Federation | Asia      | -            | -          | -           | G2394     | Synthetic | -           | -                           | 7388                      | -        | -        | 65.95      | 81.95      |
| Russian Federation | Asia      | -            | -          | -           | G2395     | Synthetic | -           | -                           | 123949                    | -        | -        | 65.95      | 82.15      |
| Russian Federation | Asia      | -            | -          | -           | G2396     | Synthetic | -           | -                           | 20072                     | -        | -        | 65.95      | 114.65     |
| Russian Federation | Asia      | -            | -          | -           | G2397     | Synthetic | -           | -                           | 7216                      | -        | -        | 65.95      | 144.65     |
| Russian Federation | Asia      | -            | -          | -           | G2398     | Synthetic | -           | -                           | 6027                      | -        | -        | 65.95      | 177.45     |
| Russian Federation | Asia      | -            | -          | -           | G2404     | Synthetic | -           | -                           | 20044                     | -        | -        | 65.85      | 82.35      |
| Russian Federation | Asia      | -            | -          | -           | G2405     | Synthetic | -           | -                           | 5514                      | -        | -        | 65.85      | 114.65     |
| Russian Federation | Asia      | -            | -          | -           | G2406     | Synthetic | -           | -                           | 8207                      | -        | -        | 65.85      | 177.65     |
| Russian Federation | Asia      | -            | -          | -           | G2410     | Synthetic | -           | -                           | 5809                      | -        | -        | 65.75      | 78.15      |
| Russian Federation | Asia      | -            | -          | -           | G2411     | Synthetic | -           | -                           | 74935                     | -        | -        | 65.75      | 78.25      |
| Russian Federation | Asia      | -            | -          | -           | G2412     | Synthetic | -           | -                           | 103419                    | -        | -        | 65.75      | 82.25      |
| Russian Federation | Asia      | -            | -          | -           | G2413     | Synthetic | -           | -                           | 610884                    | -        | -        | 65.75      | 88.05      |
| Russian Federation | Asia      | -            | -          | -           | G2414     | Synthetic | -           | -                           | 9481                      | -        | -        | 65.75      | 142.65     |
| Russian Federation | Asia      | -            | -          | -           | G2415     | Synthetic | -           | -                           | 6852                      | -        | -        | 65.75      | 150.75     |
| Russian Federation | Asia      | -            | -          | -           | G2416     | Synthetic | -           | -                           | 314979                    | -        | -        | 65.75      | 150.85     |
| Russian Federation | Asia      | -            | -          | -           | G2417     | Synthetic | -           | -                           | 270014                    | -        | -        | 65.75      | 150.95     |
| Russian Federation | Asia      | -            | -          | -           | G2423     | Synthetic | -           | -                           | 1938940                   | -        | -        | 65.65      | 88.05      |
| Russian Federation | Asia      | -            | -          | -           | G2424     | Synthetic | -           | -                           | 9651                      | -        | -        | 65.65      | 90.15      |
| Russian Federation | Asia      | -            | -          | -           | G2425     | Synthetic | -           | -                           | 125579                    | -        | -        | 65.65      | 142.65     |
| Russian Federation | Asia      | -            | -          | -           | G2426     | Synthetic | -           | -                           | 18011                     | -        | -        | 65.65      | 150.85     |
| Russian Federation | Asia      | -            | -          | -           | G2427     | Synthetic | -           | -                           | 26900                     | -        | -        | 65.65      | 150.95     |
| Russian Federation | Asia      | -            | -          | -           | G2428     | Synthetic | -           | -                           | 48406                     | -        | -        | 65.65      | 159.45     |
| Russian Federation | Asia      | -            | -          | -           | G2429     | Synthetic | -           | -                           | 48782                     | -        | -        | 65.65      | 173.35     |
| Russian Federation | Asia      | -            | -          | -           | G2434     | Synthetic | -           | -                           | 19182                     | -        | -        | 65.55      | 64.65      |
| Russian Federation | Asia      | -            | -          | -           | G2435     | Synthetic | -           | -                           | 88910                     | -        | -        | 65.55      | 82.25      |
| Russian Federation | Asia      | -            | -          | -           | G2436     | Synthetic | -           | -                           | 13314                     | -        | -        | 65.55      | 82.45      |
| Russian Federation | Asia      | -            | -          | -           | G2437     | Synthetic | -           | -                           | 590001                    | -        | -        | 65.55      | 89.95      |
| Russian Federation | Asia      | -            | -          | -           | G2438     | Synthetic | -           | -                           | 13702                     | -        | -        | 65.55      | 159.35     |
| Russian Federation | Asia      | -            | -          | -           | G2439     | Synthetic | -           | -                           | 113547                    | -        | -        | 65.55      | 173.15     |
| Russian Federation | Asia      | -            | -          | -           | G2443     | Synthetic | -           | -                           | 18143                     | -        | -        | 65.45      | 100.65     |
| Russian Federation | Asia      | -            | -          | -           | G2444     | Synthetic | -           | -                           | 21881                     | -        | -        | 65.45      | 168.65     |
| Russian Federation | Asia      | -            | -          | -           | G2451     | Synthetic | -           | -                           | 5498                      | -        | -        | 65.35      | 73.25      |
| Russian Federation | Asia      | -            | -          | -           | G2452     | Synthetic | -           | -                           | 14570                     | -        | -        | 65.35      | 100.65     |
| Russian Federation | Asia      | -            | -          | -           | G2453     | Synthetic | -           | -                           | 8564                      | -        | -        | 65.35      | 155.55     |
| Russian Federation | Asia      | -            | -          | -           | G2454     | Synthetic | -           | -                           | 8806                      | -        | -        | 65.35      | 155.65     |
| Russian Federation | Asia      | -            | -          | -           | G2455     | Synthetic | -           | -                           | 10028                     | -        | -        | 65.35      | 168.45     |



| Country            | Continent | Station Name | River Name | River Basin | GloFAS ID | Provider  | Provider ID | Catchment Area Provided km² | Catchment Area GloFAS km² | LAT Prov | LON Prov | LAT GloFAS | LON GloFAS |
|--------------------|-----------|--------------|------------|-------------|-----------|-----------|-------------|-----------------------------|---------------------------|----------|----------|------------|------------|
| Russian Federation | Asia      | -            | -          | -           | G2456     | Synthetic | -           | -                           | 31964                     | -        | -        | 65.35      | 168.55     |
| Russian Federation | Asia      | -            | -          | -           | G2459     | Synthetic | -           | -                           | 35295                     | -        | -        | 65.25      | 73.25      |
| Russian Federation | Asia      | -            | -          | -           | G2460     | Synthetic | -           | -                           | 23505                     | -        | -        | 65.25      | 73.35      |
| Russian Federation | Asia      | -            | -          | -           | G2461     | Synthetic | -           | -                           | 35853                     | -        | -        | 65.25      | 101.15     |
| Russian Federation | Asia      | -            | -          | -           | G2462     | Synthetic | -           | -                           | 11015                     | -        | -        | 65.25      | 101.35     |
| Russian Federation | Asia      | -            | -          | -           | G2463     | Synthetic | -           | -                           | 31846                     | -        | -        | 65.25      | 115.75     |
| Russian Federation | Asia      | -            | -          | -           | G2464     | Synthetic | -           | -                           | 258301                    | -        | -        | 65.25      | 151.65     |
| Russian Federation | Asia      | -            | -          | -           | G2465     | Synthetic | -           | -                           | 11500                     | -        | -        | 65.25      | 168.45     |
| Russian Federation | Asia      | -            | -          | -           | G2466     | Synthetic | -           | -                           | 6560                      | -        | -        | 65.25      | 171.95     |
| Russian Federation | Asia      | -            | -          | -           | G2467     | Synthetic | -           | -                           | 17726                     | -        | -        | 65.25      | 176.45     |
| Russian Federation | Asia      | -            | -          | -           | G2473     | Synthetic | -           | -                           | 11734                     | -        | -        | 65.15      | 73.25      |
| Russian Federation | Asia      | -            | -          | -           | G2474     | Synthetic | -           | -                           | 80140                     | -        | -        | 65.15      | 81.85      |
| Russian Federation | Asia      | -            | -          | -           | G2475     | Synthetic | -           | -                           | 5758                      | -        | -        | 65.15      | 82.05      |
| Russian Federation | Asia      | -            | -          | -           | G2476     | Synthetic | -           | -                           | 1928760                   | -        | -        | 65.15      | 87.85      |
| Russian Federation | Asia      | -            | -          | -           | G2477     | Synthetic | -           | -                           | 8044                      | -        | -        | 65.15      | 87.95      |
| Russian Federation | Asia      | -            | -          | -           | G2478     | Synthetic | -           | -                           | 32667                     | -        | -        | 65.15      | 109.15     |
| Russian Federation | Asia      | -            | -          | -           | G2479     | Synthetic | -           | -                           | 9529                      | -        | -        | 65.15      | 151.65     |
| Russian Federation | Asia      | -            | -          | -           | G2480     | Synthetic | -           | -                           | 18917                     | -        | -        | 65.15      | 155.05     |
| Russian Federation | Asia      | -            | -          | -           | G2481     | Synthetic | -           | -                           | 18722                     | -        | -        | 65.15      | 176.55     |
| Russian Federation | Asia      | -            | -          | -           | G2485     | Synthetic | -           | -                           | 11331                     | -        | -        | 65.05      | 81.35      |
| Russian Federation | Asia      | -            | -          | -           | G2486     | Synthetic | -           | -                           | 12915                     | -        | -        | 65.05      | 109.15     |
| Russian Federation | Asia      | -            | -          | -           | G2487     | Synthetic | -           | -                           | 33363                     | -        | -        | 65.05      | 115.65     |
| Russian Federation | Asia      | -            | -          | -           | G2488     | Synthetic | -           | -                           | 68517                     | -        | -        | 65.05      | 116.55     |
| Russian Federation | Asia      | -            | -          | -           | G2489     | Synthetic | -           | -                           | 7799                      | -        | -        | 65.05      | 116.75     |
| Russian Federation | Asia      | -            | -          | -           | G2490     | Synthetic | -           | -                           | 23453                     | -        | -        | 65.05      | 124.65     |
| Russian Federation | Asia      | -            | -          | -           | G2491     | Synthetic | -           | -                           | 2172790                   | -        | -        | 65.05      | 124.75     |
| Russian Federation | Asia      | -            | -          | -           | G2492     | Synthetic | -           | -                           | 14448                     | -        | -        | 65.05      | 125.05     |
| Russian Federation | Asia      | -            | -          | -           | G2493     | Synthetic | -           | -                           | 14663                     | -        | -        | 65.05      | 151.15     |
| Russian Federation | Asia      | -            | -          | -           | G2494     | Synthetic | -           | -                           | 9472                      | -        | -        | 65.05      | 151.25     |
| Russian Federation | Asia      | -            | -          | -           | G2495     | Synthetic | -           | -                           | 18656                     | -        | -        | 65.05      | 155.05     |
| Russian Federation | Asia      | -            | -          | -           | G2499     | Synthetic | -           | -                           | 14286                     | -        | -        | 64.95      | 65.75      |
| Russian Federation | Asia      | -            | -          | -           | G2500     | Synthetic | -           | -                           | 14443                     | -        | -        | 64.95      | 73.95      |
| Russian Federation | Asia      | -            | -          | -           | G2501     | Synthetic | -           | -                           | 7126                      | -        | -        | 64.95      | 74.15      |
| Russian Federation | Asia      | -            | -          | -           | G2502     | Synthetic | -           | -                           | 66550                     | -        | -        | 64.95      | 81.45      |
| Russian Federation | Asia      | -            | -          | -           | G2507     | Synthetic | -           | -                           | 2450570                   | -        | -        | 64.85      | 65.55      |
| Russian Federation | Asia      | -            | -          | -           | G2508     | Synthetic | -           | -                           | 1922180                   | -        | -        | 64.85      | 87.75      |
| Russian Federation | Asia      | -            | -          | -           | G2509     | Synthetic | -           | -                           | 50759                     | -        | -        | 64.85      | 101.55     |
| Russian Federation | Asia      | -            | -          | -           | G2510     | Synthetic | -           | -                           | 2157900                   | -        | -        | 64.85      | 125.05     |
| Russian Federation | Asia      | -            | -          | -           | G2511     | Synthetic | -           | -                           | 2149360                   | -        | -        | 64.85      | 125.15     |

| Country            | Continent | Station Name | River Name | River Basin | GloFAS ID | Provider  | Provider ID | Catchment Area Provided km² | Catchment Area GloFAS km² | LAT Prov | LON Prov | LAT GloFAS | LON GloFAS |
|--------------------|-----------|--------------|------------|-------------|-----------|-----------|-------------|-----------------------------|---------------------------|----------|----------|------------|------------|
| Russian Federation | Asia      | -            | -          | -           | G2514     | Synthetic | -           | -                           | 6688                      | -        | -        | 64.75      | 77.25      |
| Russian Federation | Asia      | -            | -          | -           | G2515     | Synthetic | -           | -                           | 20482                     | -        | -        | 64.75      | 101.55     |
| Russian Federation | Asia      | -            | -          | -           | G2516     | Synthetic | -           | -                           | 8484                      | -        | -        | 64.75      | 125.15     |
| Russian Federation | Asia      | -            | -          | -           | G2517     | Synthetic | -           | -                           | 45233                     | -        | -        | 64.75      | 154.05     |
| Russian Federation | Asia      | -            | -          | -           | G2519     | Synthetic | -           | -                           | 23146                     | -        | -        | 64.65      | 99.85      |
| Russian Federation | Asia      | -            | -          | -           | G2520     | Synthetic | -           | -                           | 75073                     | -        | -        | 64.65      | 99.95      |
| Russian Federation | Asia      | -            | -          | -           | G2521     | Synthetic | -           | -                           | 11002                     | -        | -        | 64.65      | 125.75     |
| Russian Federation | Asia      | -            | -          | -           | G2522     | Synthetic | -           | -                           | 199682                    | -        | -        | 64.65      | 154.05     |
| Russian Federation | Asia      | -            | -          | -           | G2523     | Synthetic | -           | -                           | 175091                    | -        | -        | 64.65      | 174.65     |
| Russian Federation | Asia      | -            | -          | -           | G2528     | Synthetic | -           | -                           | 2136350                   | -        | -        | 64.55      | 125.75     |
| Russian Federation | Asia      | -            | -          | -           | G2529     | Synthetic | -           | -                           | 87386                     | -        | -        | 64.55      | 143.25     |
| Russian Federation | Asia      | -            | -          | -           | G2530     | Synthetic | -           | -                           | 25076                     | -        | -        | 64.55      | 143.35     |
| Russian Federation | Asia      | -            | -          | -           | G2536     | Synthetic | -           | -                           | 15369                     | -        | -        | 64.45      | 76.75      |
| Russian Federation | Asia      | -            | -          | -           | G2537     | Synthetic | -           | -                           | 6338                      | -        | -        | 64.45      | 92.75      |
| Russian Federation | Asia      | -            | -          | -           | G2538     | Synthetic | -           | -                           | 568895                    | -        | -        | 64.45      | 92.85      |
| Russian Federation | Asia      | -            | -          | -           | G2539     | Synthetic | -           | -                           | 19270                     | -        | -        | 64.45      | 161.05     |
| Russian Federation | Asia      | -            | -          | -           | G2540     | Synthetic | -           | -                           | 11227                     | -        | -        | 64.45      | 161.25     |
| Russian Federation | Asia      | -            | -          | -           | G2547     | Synthetic | -           | -                           | 106044                    | -        | -        | 64.35      | 65.75      |
| Russian Federation | Asia      | -            | -          | -           | G2548     | Synthetic | -           | -                           | 2342500                   | -        | -        | 64.35      | 65.95      |
| Russian Federation | Asia      | -            | -          | -           | G2549     | Synthetic | -           | -                           | 9883                      | -        | -        | 64.35      | 76.75      |
| Russian Federation | Asia      | -            | -          | -           | G2550     | Synthetic | -           | -                           | 101722                    | -        | -        | 64.35      | 100.25     |
| Russian Federation | Asia      | -            | -          | -           | G2551     | Synthetic | -           | -                           | 10033                     | -        | -        | 64.35      | 171.35     |
| Russian Federation | Asia      | -            | -          | -           | G2558     | Synthetic | -           | -                           | 17816                     | -        | -        | 64.25      | 93.85      |
| Russian Federation | Asia      | -            | -          | -           | G2559     | Synthetic | -           | -                           | 305893                    | -        | -        | 64.25      | 100.25     |
| Russian Federation | Asia      | -            | -          | -           | G2560     | Synthetic | -           | -                           | 44724                     | -        | -        | 64.25      | 121.25     |
| Russian Federation | Asia      | -            | -          | -           | G2561     | Synthetic | -           | -                           | 7372                      | -        | -        | 64.25      | 121.45     |
| Russian Federation | Asia      | -            | -          | -           | G2562     | Synthetic | -           | -                           | 78948                     | -        | -        | 64.25      | 142.75     |
| Russian Federation | Asia      | -            | -          | -           | G2563     | Synthetic | -           | -                           | 6570                      | -        | -        | 64.25      | 142.85     |
| Russian Federation | Asia      | -            | -          | -           | G2564     | Synthetic | -           | -                           | 27306                     | -        | -        | 64.25      | 154.55     |
| Russian Federation | Asia      | -            | -          | -           | G2565     | Synthetic | -           | -                           | 20730                     | -        | -        | 64.25      | 171.25     |
| Russian Federation | Asia      | -            | -          | -           | G2569     | Synthetic | -           | -                           | 6196                      | -        | -        | 64.15      | 87.55      |
| Russian Federation | Asia      | -            | -          | -           | G2570     | Synthetic | -           | -                           | 546552                    | -        | -        | 64.15      | 93.85      |
| Russian Federation | Asia      | -            | -          | -           | G2571     | Synthetic | -           | -                           | 6106                      | -        | -        | 64.15      | 98.05      |
| Russian Federation | Asia      | -            | -          | -           | G2572     | Synthetic | -           | -                           | 427908                    | -        | -        | 64.15      | 98.15      |
| Russian Federation | Asia      | -            | -          | -           | G2573     | Synthetic | -           | -                           | 408298                    | -        | -        | 64.15      | 99.95      |
| Russian Federation | Asia      | -            | -          | -           | G2574     | Synthetic | -           | -                           | 52747                     | -        | -        | 64.15      | 109.45     |
| Russian Federation | Asia      | -            | -          | -           | G2575     | Synthetic | -           | -                           | 7659                      | -        | -        | 64.15      | 109.65     |
| Russian Federation | Asia      | -            | -          | -           | G2576     | Synthetic | -           | -                           | 13336                     | -        | -        | 64.15      | 135.95     |
| Russian Federation | Asia      | -            | -          | -           | G2577     | Synthetic | -           | -                           | 12255                     | -        | -        | 64.15      | 136.05     |

| Country            | Continent | Station Name | River Name | River Basin | GloFAS ID | Provider  | Provider ID | Catchment Area Provided km² | Catchment Area GloFAS km² | LAT Prov | LON Prov | LAT GloFAS | LON GloFAS |
|--------------------|-----------|--------------|------------|-------------|-----------|-----------|-------------|-----------------------------|---------------------------|----------|----------|------------|------------|
| Russian Federation | Asia      | -            | -          | -           | G2578     | Synthetic | -           | -                           | 168060                    | -        | -        | 64.15      | 154.45     |
| Russian Federation | Asia      | -            | -          | -           | G2581     | Synthetic | -           | -                           | 15455                     | -        | -        | 64.05      | 81.85      |
| Russian Federation | Asia      | -            | -          | -           | G2582     | Synthetic | -           | -                           | 45424                     | -        | -        | 64.05      | 82.05      |
| Russian Federation | Asia      | -            | -          | -           | G2583     | Synthetic | -           | -                           | 1906050                   | -        | -        | 64.05      | 87.55      |
| Russian Federation | Asia      | -            | -          | -           | G2584     | Synthetic | -           | -                           | 15252                     | -        | -        | 64.05      | 99.95      |
| Russian Federation | Asia      | -            | -          | -           | G2585     | Synthetic | -           | -                           | 341182                    | -        | -        | 64.05      | 123.75     |
| Russian Federation | Asia      | -            | -          | -           | G2586     | Synthetic | -           | -                           | 12568                     | -        | -        | 64.05      | 170.75     |
| Russian Federation | Asia      | -            | -          | -           | G2587     | Synthetic | -           | -                           | 6500                      | -        | -        | 63.95      | 65.05      |
| Russian Federation | Asia      | -            | -          | -           | G2588     | Synthetic | -           | -                           | 11191                     | -        | -        | 63.95      | 105.85     |
| Russian Federation | Asia      | -            | -          | -           | G2589     | Synthetic | -           | -                           | 7357                      | -        | -        | 63.95      | 123.75     |
| Russian Federation | Asia      | -            | -          | -           | G2590     | Synthetic | -           | -                           | 147841                    | -        | -        | 63.95      | 154.15     |
| Russian Federation | Asia      | -            | -          | -           | G2591     | Synthetic | -           | -                           | 7418                      | -        | -        | 63.95      | 170.75     |
| Russian Federation | Asia      | -            | -          | -           | G2593     | Synthetic | -           | -                           | 97082                     | -        | -        | 63.85      | 65.05      |
| Russian Federation | Asia      | -            | -          | -           | G2594     | Synthetic | -           | -                           | 36650                     | -        | -        | 63.85      | 65.95      |
| Russian Federation | Asia      | -            | -          | -           | G2595     | Synthetic | -           | -                           | 5793                      | -        | -        | 63.85      | 68.05      |
| Russian Federation | Asia      | -            | -          | -           | G2596     | Synthetic | -           | -                           | 10645                     | -        | -        | 63.85      | 83.55      |
| Russian Federation | Asia      | -            | -          | -           | G2597     | Synthetic | -           | -                           | 17843                     | -        | -        | 63.85      | 105.75     |
| Russian Federation | Asia      | -            | -          | -           | G2598     | Synthetic | -           | -                           | 54219                     | -        | -        | 63.85      | 121.45     |
| Russian Federation | Asia      | -            | -          | -           | G2599     | Synthetic | -           | -                           | 18432                     | -        | -        | 63.85      | 154.25     |
| Russian Federation | Asia      | -            | -          | -           | G2602     | Synthetic | -           | -                           | 28765                     | -        | -        | 63.75      | 61.55      |
| Russian Federation | Asia      | -            | -          | -           | G2603     | Synthetic | -           | -                           | 2301330                   | -        | -        | 63.75      | 65.75      |
| Russian Federation | Asia      | -            | -          | -           | G2604     | Synthetic | -           | -                           | 22442                     | -        | -        | 63.75      | 67.25      |
| Russian Federation | Asia      | -            | -          | -           | G2605     | Synthetic | -           | -                           | 14976                     | -        | -        | 63.75      | 68.05      |
| Russian Federation | Asia      | -            | -          | -           | G2606     | Synthetic | -           | -                           | 5972                      | -        | -        | 63.75      | 82.35      |
| Russian Federation | Asia      | -            | -          | -           | G2607     | Synthetic | -           | -                           | 38304                     | -        | -        | 63.75      | 82.45      |
| Russian Federation | Asia      | -            | -          | -           | G2608     | Synthetic | -           | -                           | 19589                     | -        | -        | 63.75      | 83.45      |
| Russian Federation | Asia      | -            | -          | -           | G2609     | Synthetic | -           | -                           | 506130                    | -        | -        | 63.75      | 96.55      |
| Russian Federation | Asia      | -            | -          | -           | G2610     | Synthetic | -           | -                           | 35250                     | -        | -        | 63.75      | 98.05      |
| Russian Federation | Asia      | -            | -          | -           | G2611     | Synthetic | -           | -                           | 240526                    | -        | -        | 63.75      | 105.85     |
| Russian Federation | Asia      | -            | -          | -           | G2612     | Synthetic | -           | -                           | 269927                    | -        | -        | 63.75      | 120.95     |
| Russian Federation | Asia      | -            | -          | -           | G2613     | Synthetic | -           | -                           | 278637                    | -        | -        | 63.75      | 121.45     |
| Russian Federation | Asia      | -            | -          | -           | G2614     | Synthetic | -           | -                           | 358160                    | -        | -        | 63.75      | 126.05     |
| Russian Federation | Asia      | -            | -          | -           | G2615     | Synthetic | -           | -                           | 16607                     | -        | -        | 63.75      | 127.45     |
| Russian Federation | Asia      | -            | -          | -           | G2616     | Synthetic | -           | -                           | 1740030                   | -        | -        | 63.75      | 127.65     |
| Russian Federation | Asia      | -            | -          | -           | G2620     | Synthetic | -           | -                           | 22187                     | -        | -        | 63.65      | 96.55      |
| Russian Federation | Asia      | -            | -          | -           | G2621     | Synthetic | -           | -                           | 16672                     | -        | -        | 63.65      | 119.65     |
| Russian Federation | Asia      | -            | -          | -           | G2622     | Synthetic | -           | -                           | 8248                      | -        | -        | 63.65      | 121.05     |
| Russian Federation | Asia      | -            | -          | -           | G2623     | Synthetic | -           | -                           | 7612                      | -        | -        | 63.65      | 126.05     |
| Russian Federation | Asia      | -            | -          | -           | G2624     | Synthetic | -           | -                           | 8302                      | -        | -        | 63.65      | 127.65     |

| Country            | Continent | Station Name | River Name | River Basin | GloFAS ID | Provider  | Provider ID | Catchment Area Provided km² | Catchment Area GloFAS km² | LAT Prov | LON Prov | LAT GloFAS | LON GloFAS |
|--------------------|-----------|--------------|------------|-------------|-----------|-----------|-------------|-----------------------------|---------------------------|----------|----------|------------|------------|
| Russian Federation | Asia      | -            | -          | -           | G2625     | Synthetic | -           | -                           | 24341                     | -        | -        | 63.65      | 142.25     |
| Russian Federation | Asia      | -            | -          | -           | G2626     | Synthetic | -           | -                           | 27197                     | -        | -        | 63.65      | 142.35     |
| Russian Federation | Asia      | -            | -          | -           | G2632     | Synthetic | -           | -                           | 39292                     | -        | -        | 63.55      | 61.55      |
| Russian Federation | Asia      | -            | -          | -           | G2633     | Synthetic | -           | -                           | 282351                    | -        | -        | 63.55      | 104.65     |
| Russian Federation | Asia      | -            | -          | -           | G2634     | Synthetic | -           | -                           | 260631                    | -        | -        | 63.55      | 104.95     |
| Russian Federation | Asia      | -            | -          | -           | G2635     | Synthetic | -           | -                           | 64438                     | -        | -        | 63.55      | 109.35     |
| Russian Federation | Asia      | -            | -          | -           | G2636     | Synthetic | -           | -                           | 5891                      | -        | -        | 63.55      | 112.15     |
| Russian Federation | Asia      | -            | -          | -           | G2637     | Synthetic | -           | -                           | 104225                    | -        | -        | 63.55      | 118.75     |
| Russian Federation | Asia      | -            | -          | -           | G2638     | Synthetic | -           | -                           | 236555                    | -        | -        | 63.55      | 119.65     |
| Russian Federation | Asia      | -            | -          | -           | G2639     | Synthetic | -           | -                           | 253285                    | -        | -        | 63.55      | 119.75     |
| Russian Federation | Asia      | -            | -          | -           | G2640     | Synthetic | -           | -                           | 7957                      | -        | -        | 63.55      | 127.55     |
| Russian Federation | Asia      | -            | -          | -           | G2641     | Synthetic | -           | -                           | 1722800                   | -        | -        | 63.55      | 128.75     |
| Russian Federation | Asia      | -            | -          | -           | G2642     | Synthetic | -           | -                           | 1717000                   | -        | -        | 63.55      | 128.85     |
| Russian Federation | Asia      | -            | -          | -           | G2643     | Synthetic | -           | -                           | 15261                     | -        | -        | 63.55      | 129.35     |
| Russian Federation | Asia      | -            | -          | -           | G2648     | Synthetic | -           | -                           | 6748                      | -        | -        | 63.45      | 104.65     |
| Russian Federation | Asia      | -            | -          | -           | G2649     | Synthetic | -           | -                           | 21313                     | -        | -        | 63.45      | 104.95     |
| Russian Federation | Asia      | -            | -          | -           | G2650     | Synthetic | -           | -                           | 9096                      | -        | -        | 63.45      | 109.35     |
| Russian Federation | Asia      | -            | -          | -           | G2651     | Synthetic | -           | -                           | 6234                      | -        | -        | 63.45      | 112.15     |
| Russian Federation | Asia      | -            | -          | -           | G2652     | Synthetic | -           | -                           | 7023                      | -        | -        | 63.45      | 119.75     |
| Russian Federation | Asia      | -            | -          | -           | G2653     | Synthetic | -           | -                           | 10696                     | -        | -        | 63.45      | 128.85     |
| Russian Federation | Asia      | -            | -          | -           | G2654     | Synthetic | -           | -                           | 1700460                   | -        | -        | 63.45      | 129.35     |
| Russian Federation | Asia      | -            | -          | -           | G2655     | Synthetic | -           | -                           | 746879                    | -        | -        | 63.45      | 129.45     |
| Russian Federation | Asia      | -            | -          | -           | G2656     | Synthetic | -           | -                           | 9505                      | -        | -        | 63.45      | 130.45     |
| Russian Federation | Asia      | -            | -          | -           | G2657     | Synthetic | -           | -                           | 32856                     | -        | -        | 63.45      | 136.65     |
| Russian Federation | Asia      | -            | -          | -           | G2660     | Synthetic | -           | -                           | 1871650                   | -        | -        | 63.35      | 87.45      |
| Russian Federation | Asia      | -            | -          | -           | G2661     | Synthetic | -           | -                           | 24339                     | -        | -        | 63.35      | 89.45      |
| Russian Federation | Asia      | -            | -          | -           | G2662     | Synthetic | -           | -                           | 131047                    | -        | -        | 63.35      | 118.75     |
| Russian Federation | Asia      | -            | -          | -           | G2663     | Synthetic | -           | -                           | 953114                    | -        | -        | 63.35      | 129.45     |
| Russian Federation | Asia      | -            | -          | -           | G2664     | Synthetic | -           | -                           | 735556                    | -        | -        | 63.35      | 130.45     |
| Russian Federation | Asia      | -            | -          | -           | G2665     | Synthetic | -           | -                           | 7228                      | -        | -        | 63.35      | 136.75     |
| Russian Federation | Asia      | -            | -          | -           | G2666     | Synthetic | -           | -                           | 8437                      | -        | -        | 63.35      | 141.55     |
| Russian Federation | Asia      | -            | -          | -           | G2667     | Synthetic | -           | -                           | 9850                      | -        | -        | 63.35      | 143.35     |
| Russian Federation | Asia      | -            | -          | -           | G2673     | Synthetic | -           | -                           | 26015                     | -        | -        | 63.25      | 87.35      |
| Russian Federation | Asia      | -            | -          | -           | G2674     | Synthetic | -           | -                           | 8057                      | -        | -        | 63.25      | 141.65     |
| Russian Federation | Asia      | -            | -          | -           | G2675     | Synthetic | -           | -                           | 15069                     | -        | -        | 63.25      | 143.15     |
| Russian Federation | Asia      | -            | -          | -           | G2679     | Synthetic | -           | -                           | 6631                      | -        | -        | 63.15      | 61.15      |
| Russian Federation | Asia      | -            | -          | -           | G2680     | Synthetic | -           | -                           | 81485                     | -        | -        | 63.15      | 64.25      |
| Russian Federation | Asia      | -            | -          | -           | G2681     | Synthetic | -           | -                           | 11284                     | -        | -        | 63.15      | 64.45      |
| Russian Federation | Asia      | -            | -          | -           | G2685     | Synthetic | -           | -                           | 29496                     | -        | -        | 63.05      | 61.25      |

| Country            | Continent | Station Name | River Name | River Basin | GloFAS ID | Provider  | Provider ID | Catchment Area Provided km² | Catchment Area GloFAS km² | LAT Prov | LON Prov | LAT GloFAS | LON GloFAS |
|--------------------|-----------|--------------|------------|-------------|-----------|-----------|-------------|-----------------------------|---------------------------|----------|----------|------------|------------|
| Russian Federation | Asia      | -            | -          | -           | G2686     | Synthetic | -           | -                           | 40516                     | -        | -        | 63.05      | 113.35     |
| Russian Federation | Asia      | -            | -          | -           | G2687     | Synthetic | -           | -                           | 11439                     | -        | -        | 63.05      | 113.55     |
| Russian Federation | Asia      | -            | -          | -           | G2688     | Synthetic | -           | -                           | 697751                    | -        | -        | 63.05      | 133.55     |
| Russian Federation | Asia      | -            | -          | -           | G2689     | Synthetic | -           | -                           | 686750                    | -        | -        | 63.05      | 133.95     |
| Russian Federation | Asia      | -            | -          | -           | G2690     | Synthetic | -           | -                           | 9821                      | -        | -        | 63.05      | 134.05     |
| Russian Federation | Asia      | -            | -          | -           | G2694     | Synthetic | -           | -                           | 20109                     | -        | -        | 62.95      | 112.65     |
| Russian Federation | Asia      | -            | -          | -           | G2695     | Synthetic | -           | -                           | 12404                     | -        | -        | 62.95      | 117.35     |
| Russian Federation | Asia      | -            | -          | -           | G2696     | Synthetic | -           | -                           | 10075                     | -        | -        | 62.95      | 133.55     |
| Russian Federation | Asia      | -            | -          | -           | G2698     | Synthetic | -           | -                           | 17329                     | -        | -        | 62.85      | 112.75     |
| Russian Federation | Asia      | -            | -          | -           | G2699     | Synthetic | -           | -                           | 106189                    | -        | -        | 62.85      | 117.45     |
| Russian Federation | Asia      | -            | -          | -           | G2705     | Synthetic | -           | -                           | 45634                     | -        | -        | 62.75      | 134.65     |
| Russian Federation | Asia      | -            | -          | -           | G2706     | Synthetic | -           | -                           | 10500                     | -        | -        | 62.75      | 150.75     |
| Russian Federation | Asia      | -            | -          | -           | G2707     | Synthetic | -           | -                           | 26827                     | -        | -        | 62.75      | 152.55     |
| Russian Federation | Asia      | -            | -          | -           | G2712     | Synthetic | -           | -                           | 639388                    | -        | -        | 62.65      | 134.65     |
| Russian Federation | Asia      | -            | -          | -           | G2713     | Synthetic | -           | -                           | 88609                     | -        | -        | 62.65      | 150.75     |
| Russian Federation | Asia      | -            | -          | -           | G2714     | Synthetic | -           | -                           | 106722                    | -        | -        | 62.65      | 152.45     |
| Russian Federation | Asia      | -            | -          | -           | G2715     | Synthetic | -           | -                           | 13259                     | -        | -        | 62.65      | 166.55     |
| Russian Federation | Asia      | -            | -          | -           | G2718     | Synthetic | -           | -                           | 71857                     | -        | -        | 62.55      | 135.05     |
| Russian Federation | Asia      | -            | -          | -           | G2719     | Synthetic | -           | -                           | 566752                    | -        | -        | 62.55      | 135.25     |
| Russian Federation | Asia      | -            | -          | -           | G2720     | Synthetic | -           | -                           | 11071                     | -        | -        | 62.55      | 135.65     |
| Russian Federation | Asia      | -            | -          | -           | G2721     | Synthetic | -           | -                           | 46652                     | -        | -        | 62.55      | 166.55     |
| Russian Federation | Asia      | -            | -          | -           | G2728     | Synthetic | -           | -                           | 37930                     | -        | -        | 62.45      | 89.05      |
| Russian Federation | Asia      | -            | -          | -           | G2729     | Synthetic | -           | -                           | 125218                    | -        | -        | 62.45      | 108.35     |
| Russian Federation | Asia      | -            | -          | -           | G2730     | Synthetic | -           | -                           | 553527                    | -        | -        | 62.45      | 135.65     |
| Russian Federation | Asia      | -            | -          | -           | G2731     | Synthetic | -           | -                           | 14526                     | -        | -        | 62.45      | 147.65     |
| Russian Federation | Asia      | -            | -          | -           | G2732     | Synthetic | -           | -                           | 10215                     | -        | -        | 62.45      | 147.75     |
| Russian Federation | Asia      | -            | -          | -           | G2739     | Synthetic | -           | -                           | 10981                     | -        | -        | 62.35      | 61.35      |
| Russian Federation | Asia      | -            | -          | -           | G2740     | Synthetic | -           | -                           | 6153                      | -        | -        | 62.35      | 86.05      |
| Russian Federation | Asia      | -            | -          | -           | G2741     | Synthetic | -           | -                           | 1820440                   | -        | -        | 62.35      | 88.95      |
| Russian Federation | Asia      | -            | -          | -           | G2742     | Synthetic | -           | -                           | 96611                     | -        | -        | 62.35      | 108.25     |
| Russian Federation | Asia      | -            | -          | -           | G2743     | Synthetic | -           | -                           | 15540                     | -        | -        | 62.35      | 135.85     |
| Russian Federation | Asia      | -            | -          | -           | G2751     | Synthetic | -           | -                           | 10482                     | -        | -        | 62.25      | 61.45      |
| Russian Federation | Asia      | -            | -          | -           | G2752     | Synthetic | -           | -                           | 2267740                   | -        | -        | 62.25      | 66.95      |
| Russian Federation | Asia      | -            | -          | -           | G2753     | Synthetic | -           | -                           | 9820                      | -        | -        | 62.25      | 86.25      |
| Russian Federation | Asia      | -            | -          | -           | G2754     | Synthetic | -           | -                           | 537746                    | -        | -        | 62.25      | 135.85     |
| Russian Federation | Asia      | -            | -          | -           | G2755     | Synthetic | -           | -                           | 16866                     | -        | -        | 62.25      | 147.65     |
| Russian Federation | Asia      | -            | -          | -           | G2759     | Synthetic | -           | -                           | 13850                     | -        | -        | 62.15      | 166.55     |
| Russian Federation | Asia      | -            | -          | -           | G2766     | Synthetic | -           | -                           | 14160                     | -        | -        | 62.05      | 66.95      |
| Russian Federation | Asia      | -            | -          | -           | G2767     | Synthetic | -           | -                           | 15437                     | -        | -        | 62.05      | 75.65      |

| Country            | Continent | Station Name | River Name | River Basin | GloFAS ID | Provider  | Provider ID | Catchment Area Provided km² | Catchment Area GloFAS km² | LAT Prov | LON Prov | LAT GloFAS | LON GloFAS |
|--------------------|-----------|--------------|------------|-------------|-----------|-----------|-------------|-----------------------------|---------------------------|----------|----------|------------|------------|
| Russian Federation | Asia      | -            | -          | -           | G2768     | Synthetic | -           | -                           | 96278                     | -        | -        | 62.05      | 109.75     |
| Russian Federation | Asia      | -            | -          | -           | G2769     | Synthetic | -           | -                           | 87583                     | -        | -        | 62.05      | 117.45     |
| Russian Federation | Asia      | -            | -          | -           | G2770     | Synthetic | -           | -                           | 934366                    | -        | -        | 62.05      | 129.85     |
| Russian Federation | Asia      | -            | -          | -           | G2771     | Synthetic | -           | -                           | 65156                     | -        | -        | 62.05      | 150.55     |
| Russian Federation | Asia      | -            | -          | -           | G2772     | Synthetic | -           | -                           | 7523                      | -        | -        | 62.05      | 166.55     |
| Russian Federation | Asia      | -            | -          | -           | G2779     | Synthetic | -           | -                           | 7576                      | -        | -        | 61.95      | 73.75      |
| Russian Federation | Asia      | -            | -          | -           | G2780     | Synthetic | -           | -                           | 7965                      | -        | -        | 61.95      | 73.95      |
| Russian Federation | Asia      | -            | -          | -           | G2781     | Synthetic | -           | -                           | 23783                     | -        | -        | 61.95      | 109.65     |
| Russian Federation | Asia      | -            | -          | -           | G2782     | Synthetic | -           | -                           | 78628                     | -        | -        | 61.95      | 117.25     |
| Russian Federation | Asia      | -            | -          | -           | G2783     | Synthetic | -           | -                           | 6282                      | -        | -        | 61.95      | 117.55     |
| Russian Federation | Asia      | -            | -          | -           | G2784     | Synthetic | -           | -                           | 10500                     | -        | -        | 61.95      | 153.35     |
| Russian Federation | Asia      | -            | -          | -           | G2785     | Synthetic | -           | -                           | 10718                     | -        | -        | 61.95      | 153.55     |
| Russian Federation | Asia      | -            | -          | -           | G2789     | Synthetic | -           | -                           | 181294                    | -        | -        | 61.85      | 92.85      |
| Russian Federation | Asia      | -            | -          | -           | G2790     | Synthetic | -           | -                           | 7301                      | -        | -        | 61.85      | 97.35      |
| Russian Federation | Asia      | -            | -          | -           | G2791     | Synthetic | -           | -                           | 7188                      | -        | -        | 61.85      | 97.75      |
| Russian Federation | Asia      | -            | -          | -           | G2792     | Synthetic | -           | -                           | 8467                      | -        | -        | 61.85      | 117.25     |
| Russian Federation | Asia      | -            | -          | -           | G2797     | Synthetic | -           | -                           | 35375                     | -        | -        | 61.75      | 92.65      |
| Russian Federation | Asia      | -            | -          | -           | G2798     | Synthetic | -           | -                           | 48593                     | -        | -        | 61.75      | 97.55      |
| Russian Federation | Asia      | -            | -          | -           | G2799     | Synthetic | -           | -                           | 40912                     | -        | -        | 61.75      | 97.85      |
| Russian Federation | Asia      | -            | -          | -           | G2800     | Synthetic | -           | -                           | 11191                     | -        | -        | 61.75      | 109.65     |
| Russian Federation | Asia      | -            | -          | -           | G2801     | Synthetic | -           | -                           | 9151                      | -        | -        | 61.75      | 135.55     |
| Russian Federation | Asia      | -            | -          | -           | G2808     | Synthetic | -           | -                           | 67254                     | -        | -        | 61.65      | 96.55      |
| Russian Federation | Asia      | -            | -          | -           | G2809     | Synthetic | -           | -                           | 56693                     | -        | -        | 61.65      | 97.25      |
| Russian Federation | Asia      | -            | -          | -           | G2810     | Synthetic | -           | -                           | 10870                     | -        | -        | 61.65      | 109.55     |
| Russian Federation | Asia      | -            | -          | -           | G2811     | Synthetic | -           | -                           | 514772                    | -        | -        | 61.65      | 135.55     |
| Russian Federation | Asia      | -            | -          | -           | G2812     | Synthetic | -           | -                           | 53301                     | -        | -        | 61.65      | 149.35     |
| Russian Federation | Asia      | -            | -          | -           | G2817     | Synthetic | -           | -                           | 92494                     | -        | -        | 61.55      | 96.45      |
| Russian Federation | Asia      | -            | -          | -           | G2818     | Synthetic | -           | -                           | 9450                      | -        | -        | 61.55      | 97.25      |
| Russian Federation | Asia      | -            | -          | -           | G2819     | Synthetic | -           | -                           | 6588                      | -        | -        | 61.55      | 149.35     |
| Russian Federation | Asia      | -            | -          | -           | G2833     | Synthetic | -           | -                           | 14012                     | -        | -        | 61.35      | 71.75      |
| Russian Federation | Asia      | -            | -          | -           | G2834     | Synthetic | -           | -                           | 20449                     | -        | -        | 61.35      | 74.75      |
| Russian Federation | Asia      | -            | -          | -           | G2835     | Synthetic | -           | -                           | 30262                     | -        | -        | 61.35      | 74.85      |
| Russian Federation | Asia      | -            | -          | -           | G2839     | Synthetic | -           | -                           | 12571                     | -        | -        | 61.25      | 68.95      |
| Russian Federation | Asia      | -            | -          | -           | G2840     | Synthetic | -           | -                           | 19588                     | -        | -        | 61.25      | 71.85      |
| Russian Federation | Asia      | -            | -          | -           | G2841     | Synthetic | -           | -                           | 51209                     | -        | -        | 61.25      | 74.75      |
| Russian Federation | Asia      | -            | -          | -           | G2842     | Synthetic | -           | -                           | 10470                     | -        | -        | 61.25      | 80.55      |
| Russian Federation | Asia      | -            | -          | -           | G2843     | Synthetic | -           | -                           | 20640                     | -        | -        | 61.25      | 81.05      |
| Russian Federation | Asia      | -            | -          | -           | G2844     | Synthetic | -           | -                           | 904447                    | -        | -        | 61.25      | 128.65     |
| Russian Federation | Asia      | -            | -          | -           | G2845     | Synthetic | -           | -                           | 13216                     | -        | -        | 61.25      | 128.75     |

| Country            | Continent | Station Name | River Name | River Basin | GloFAS ID | Provider  | Provider ID | Catchment Area Provided km² | Catchment Area GloFAS km² | LAT Prov | LON Prov | LAT GloFAS | LON GloFAS |
|--------------------|-----------|--------------|------------|-------------|-----------|-----------|-------------|-----------------------------|---------------------------|----------|----------|------------|------------|
| Russian Federation | Asia      | -            | -          | -           | G2846     | Synthetic | -           | -                           | 1041470                   | -        | -        | 61.15      | 70.95      |
| Russian Federation | Asia      | -            | -          | -           | G2847     | Synthetic | -           | -                           | 1004750                   | -        | -        | 61.15      | 71.85      |
| Russian Federation | Asia      | -            | -          | -           | G2848     | Synthetic | -           | -                           | 900992                    | -        | -        | 61.15      | 74.75      |
| Russian Federation | Asia      | -            | -          | -           | G2849     | Synthetic | -           | -                           | 14794                     | -        | -        | 61.15      | 78.35      |
| Russian Federation | Asia      | -            | -          | -           | G2850     | Synthetic | -           | -                           | 17166                     | -        | -        | 61.15      | 79.95      |
| Russian Federation | Asia      | -            | -          | -           | G2851     | Synthetic | -           | -                           | 28373                     | -        | -        | 61.15      | 80.55      |
| Russian Federation | Asia      | -            | -          | -           | G2852     | Synthetic | -           | -                           | 7295                      | -        | -        | 61.15      | 81.05      |
| Russian Federation | Asia      | -            | -          | -           | G2857     | Synthetic | -           | -                           | 16073                     | -        | -        | 61.05      | 70.95      |
| Russian Federation | Asia      | -            | -          | -           | G2858     | Synthetic | -           | -                           | 959420                    | -        | -        | 61.05      | 73.45      |
| Russian Federation | Asia      | -            | -          | -           | G2859     | Synthetic | -           | -                           | 61283                     | -        | -        | 61.05      | 78.35      |
| Russian Federation | Asia      | -            | -          | -           | G2860     | Synthetic | -           | -                           | 41042                     | -        | -        | 61.05      | 79.95      |
| Russian Federation | Asia      | -            | -          | -           | G2861     | Synthetic | -           | -                           | 7739                      | -        | -        | 61.05      | 135.35     |
| Russian Federation | Asia      | -            | -          | -           | G2863     | Synthetic | -           | -                           | 37103                     | -        | -        | 60.95      | 73.45      |
| Russian Federation | Asia      | -            | -          | -           | G2864     | Synthetic | -           | -                           | 16006                     | -        | -        | 60.95      | 89.55      |
| Russian Federation | Asia      | -            | -          | -           | G2865     | Synthetic | -           | -                           | 8898                      | -        | -        | 60.95      | 92.95      |
| Russian Federation | Asia      | -            | -          | -           | G2866     | Synthetic | -           | -                           | 13973                     | -        | -        | 60.95      | 93.05      |
| Russian Federation | Asia      | -            | -          | -           | G2867     | Synthetic | -           | -                           | 12376                     | -        | -        | 60.95      | 107.75     |
| Russian Federation | Asia      | -            | -          | -           | G2868     | Synthetic | -           | -                           | 68287                     | -        | -        | 60.95      | 107.85     |
| Russian Federation | Asia      | -            | -          | -           | G2869     | Synthetic | -           | -                           | 501797                    | -        | -        | 60.95      | 135.35     |
| Russian Federation | Asia      | -            | -          | -           | G2872     | Synthetic | -           | -                           | 6543                      | -        | -        | 60.85      | 75.65      |
| Russian Federation | Asia      | -            | -          | -           | G2873     | Synthetic | -           | -                           | 85872                     | -        | -        | 60.85      | 76.75      |
| Russian Federation | Asia      | -            | -          | -           | G2874     | Synthetic | -           | -                           | 1555060                   | -        | -        | 60.85      | 89.75      |
| Russian Federation | Asia      | -            | -          | -           | G2877     | Synthetic | -           | -                           | 799270                    | -        | -        | 60.75      | 76.75      |
| Russian Federation | Asia      | -            | -          | -           | G2878     | Synthetic | -           | -                           | 15162                     | -        | -        | 60.75      | 97.35      |
| Russian Federation | Asia      | -            | -          | -           | G2879     | Synthetic | -           | -                           | 18011                     | -        | -        | 60.75      | 121.05     |
| Russian Federation | Asia      | -            | -          | -           | G2883     | Synthetic | -           | -                           | 8425                      | -        | -        | 60.65      | 74.05      |
| Russian Federation | Asia      | -            | -          | -           | G2884     | Synthetic | -           | -                           | 68364                     | -        | -        | 60.65      | 97.55      |
| Russian Federation | Asia      | -            | -          | -           | G2885     | Synthetic | -           | -                           | 8958                      | -        | -        | 60.65      | 123.15     |
| Russian Federation | Asia      | -            | -          | -           | G2886     | Synthetic | -           | -                           | 25630                     | -        | -        | 60.65      | 135.15     |
| Russian Federation | Asia      | -            | -          | -           | G2890     | Synthetic | -           | -                           | 39300                     | -        | -        | 60.55      | 116.35     |
| Russian Federation | Asia      | -            | -          | -           | G2891     | Synthetic | -           | -                           | 823608                    | -        | -        | 60.55      | 123.15     |
| Russian Federation | Asia      | -            | -          | -           | G2892     | Synthetic | -           | -                           | 839584                    | -        | -        | 60.55      | 124.15     |
| Russian Federation | Asia      | -            | -          | -           | G2897     | Synthetic | -           | -                           | 15668                     | -        | -        | 60.45      | 87.95      |
| Russian Federation | Asia      | -            | -          | -           | G2898     | Synthetic | -           | -                           | 9077                      | -        | -        | 60.45      | 101.95     |
| Russian Federation | Asia      | -            | -          | -           | G2899     | Synthetic | -           | -                           | 17656                     | -        | -        | 60.45      | 107.75     |
| Russian Federation | Asia      | -            | -          | -           | G2900     | Synthetic | -           | -                           | 47276                     | -        | -        | 60.45      | 107.85     |
| Russian Federation | Asia      | -            | -          | -           | G2901     | Synthetic | -           | -                           | 475234                    | -        | -        | 60.45      | 116.35     |
| Russian Federation | Asia      | -            | -          | -           | G2902     | Synthetic | -           | -                           | 289325                    | -        | -        | 60.45      | 134.55     |
| Russian Federation | Asia      | -            | -          | -           | G2903     | Synthetic | -           | -                           | 472135                    | -        | -        | 60.45      | 135.05     |

| Country            | Continent | Station Name | River Name | River Basin | GloFAS ID | Provider  | Provider ID | Catchment Area Provided km² | Catchment Area GloFAS km² | LAT Prov | LON Prov | LAT GloFAS | LON GloFAS |
|--------------------|-----------|--------------|------------|-------------|-----------|-----------|-------------|-----------------------------|---------------------------|----------|----------|------------|------------|
| Russian Federation | Asia      | -            | -          | -           | G2906     | Synthetic | -           | -                           | 782680                    | -        | -        | 60.35      | 78.25      |
| Russian Federation | Asia      | -            | -          | -           | G2907     | Synthetic | -           | -                           | 33433                     | -        | -        | 60.35      | 102.05     |
| Russian Federation | Asia      | -            | -          | -           | G2908     | Synthetic | -           | -                           | 10016                     | -        | -        | 60.35      | 119.55     |
| Russian Federation | Asia      | -            | -          | -           | G2909     | Synthetic | -           | -                           | 124875                    | -        | -        | 60.35      | 120.95     |
| Russian Federation | Asia      | -            | -          | -           | G2910     | Synthetic | -           | -                           | 176764                    | -        | -        | 60.35      | 134.55     |
| Russian Federation | Asia      | -            | -          | -           | G2914     | Synthetic | -           | -                           | 33365                     | -        | -        | 60.25      | 90.05      |
| Russian Federation | Asia      | -            | -          | -           | G2915     | Synthetic | -           | -                           | 1512330                   | -        | -        | 60.25      | 90.15      |
| Russian Federation | Asia      | -            | -          | -           | G2916     | Synthetic | -           | -                           | 562454                    | -        | -        | 60.25      | 119.45     |
| Russian Federation | Asia      | -            | -          | -           | G2917     | Synthetic | -           | -                           | 216319                    | -        | -        | 60.25      | 120.65     |
| Russian Federation | Asia      | -            | -          | -           | G2918     | Synthetic | -           | -                           | 90802                     | -        | -        | 60.25      | 120.95     |
| Russian Federation | Asia      | -            | -          | -           | G2922     | Synthetic | -           | -                           | 15020                     | -        | -        | 60.15      | 102.35     |
| Russian Federation | Asia      | -            | -          | -           | G2923     | Synthetic | -           | -                           | 6428                      | -        | -        | 60.15      | 144.85     |
| Russian Federation | Asia      | -            | -          | -           | G2929     | Synthetic | -           | -                           | 16172                     | -        | -        | 60.05      | 102.25     |
| Russian Federation | Asia      | -            | -          | -           | G2930     | Synthetic | -           | -                           | 11454                     | -        | -        | 60.05      | 145.05     |
| Russian Federation | Asia      | -            | -          | -           | G2936     | Synthetic | -           | -                           | 11314                     | -        | -        | 59.95      | 90.55      |
| Russian Federation | Asia      | -            | -          | -           | G2937     | Synthetic | -           | -                           | 1497740                   | -        | -        | 59.95      | 90.65      |
| Russian Federation | Asia      | -            | -          | -           | G2941     | Synthetic | -           | -                           | 66080                     | -        | -        | 59.85      | 120.25     |
| Russian Federation | Asia      | -            | -          | -           | G2942     | Synthetic | -           | -                           | 12439                     | -        | -        | 59.85      | 148.15     |
| Russian Federation | Asia      | -            | -          | -           | G2947     | Synthetic | -           | -                           | 14500                     | -        | -        | 59.75      | 63.15      |
| Russian Federation | Asia      | -            | -          | -           | G2948     | Synthetic | -           | -                           | 23752                     | -        | -        | 59.75      | 120.35     |
| Russian Federation | Asia      | -            | -          | -           | G2949     | Synthetic | -           | -                           | 21180                     | -        | -        | 59.75      | 142.55     |
| Russian Federation | Asia      | -            | -          | -           | G2950     | Synthetic | -           | -                           | 9100                      | -        | -        | 59.75      | 148.15     |
| Russian Federation | Asia      | -            | -          | -           | G2954     | Synthetic | -           | -                           | 49132                     | -        | -        | 59.65      | 62.95      |
| Russian Federation | Asia      | -            | -          | -           | G2955     | Synthetic | -           | -                           | 21507                     | -        | -        | 59.65      | 65.95      |
| Russian Federation | Asia      | -            | -          | -           | G2956     | Synthetic | -           | -                           | 1124830                   | -        | -        | 59.65      | 69.35      |
| Russian Federation | Asia      | -            | -          | -           | G2957     | Synthetic | -           | -                           | 37046                     | -        | -        | 59.65      | 69.55      |
| Russian Federation | Asia      | -            | -          | -           | G2958     | Synthetic | -           | -                           | 15028                     | -        | -        | 59.65      | 112.65     |
| Russian Federation | Asia      | -            | -          | -           | G2959     | Synthetic | -           | -                           | 56867                     | -        | -        | 59.65      | 119.35     |
| Russian Federation | Asia      | -            | -          | -           | G2960     | Synthetic | -           | -                           | 11223                     | -        | -        | 59.65      | 142.55     |
| Russian Federation | Asia      | -            | -          | -           | G2964     | Synthetic | -           | -                           | 23370                     | -        | -        | 59.55      | 62.25      |
| Russian Federation | Asia      | -            | -          | -           | G2965     | Synthetic | -           | -                           | 10832                     | -        | -        | 59.55      | 65.95      |
| Russian Federation | Asia      | -            | -          | -           | G2966     | Synthetic | -           | -                           | 33323                     | -        | -        | 59.55      | 66.35      |
| Russian Federation | Asia      | -            | -          | -           | G2967     | Synthetic | -           | -                           | 8793                      | -        | -        | 59.55      | 79.55      |
| Russian Federation | Asia      | -            | -          | -           | G2968     | Synthetic | -           | -                           | 445192                    | -        | -        | 59.55      | 112.65     |
| Russian Federation | Asia      | -            | -          | -           | G2971     | Synthetic | -           | -                           | 20333                     | -        | -        | 59.45      | 62.25      |
| Russian Federation | Asia      | -            | -          | -           | G2972     | Synthetic | -           | -                           | 60198                     | -        | -        | 59.45      | 68.65      |
| Russian Federation | Asia      | -            | -          | -           | G2973     | Synthetic | -           | -                           | 762094                    | -        | -        | 59.45      | 79.55      |
| Russian Federation | Asia      | -            | -          | -           | G2974     | Synthetic | -           | -                           | 30497                     | -        | -        | 59.45      | 80.15      |
| Russian Federation | Asia      | -            | -          | -           | G2975     | Synthetic | -           | -                           | 241108                    | -        | -        | 59.45      | 112.65     |



| Country            | Continent | Station Name | River Name | River Basin | GloFAS ID | Provider  | Provider ID | Catchment Area Provided km² | Catchment Area GloFAS km² | LAT Prov | LON Prov | LAT GloFAS | LON GloFAS |
|--------------------|-----------|--------------|------------|-------------|-----------|-----------|-------------|-----------------------------|---------------------------|----------|----------|------------|------------|
| Russian Federation | Asia      | -            | -          | -           | G2978     | Synthetic | -           | -                           | 72666                     | -        | -        | 59.35      | 68.75      |
| Russian Federation | Asia      | -            | -          | -           | G2979     | Synthetic | -           | -                           | 730810                    | -        | -        | 59.35      | 80.15      |
| Russian Federation | Asia      | -            | -          | -           | G2980     | Synthetic | -           | -                           | 203692                    | -        | -        | 59.35      | 112.55     |
| Russian Federation | Asia      | -            | -          | -           | G2985     | Synthetic | -           | -                           | 7288                      | -        | -        | 59.25      | 61.25      |
| Russian Federation | Asia      | -            | -          | -           | G2986     | Synthetic | -           | -                           | 12206                     | -        | -        | 59.25      | 68.55      |
| Russian Federation | Asia      | -            | -          | -           | G2987     | Synthetic | -           | -                           | 1048110                   | -        | -        | 59.25      | 68.75      |
| Russian Federation | Asia      | -            | -          | -           | G2988     | Synthetic | -           | -                           | 19800                     | -        | -        | 59.25      | 108.05     |
| Russian Federation | Asia      | -            | -          | -           | G2989     | Synthetic | -           | -                           | 184819                    | -        | -        | 59.25      | 112.35     |
| Russian Federation | Asia      | -            | -          | -           | G2990     | Synthetic | -           | -                           | 45511                     | -        | -        | 59.25      | 135.25     |
| Russian Federation | Asia      | -            | -          | -           | G2994     | Synthetic | -           | -                           | 36168                     | -        | -        | 59.15      | 78.95      |
| Russian Federation | Asia      | -            | -          | -           | G2995     | Synthetic | -           | -                           | 16855                     | -        | -        | 59.15      | 108.25     |
| Russian Federation | Asia      | -            | -          | -           | G2996     | Synthetic | -           | -                           | 18609                     | -        | -        | 59.15      | 112.35     |
| Russian Federation | Asia      | -            | -          | -           | G2999     | Synthetic | -           | -                           | 8819                      | -        | -        | 59.05      | 61.35      |
| Russian Federation | Asia      | -            | -          | -           | G3000     | Synthetic | -           | -                           | 1037870                   | -        | -        | 59.05      | 68.75      |
| Russian Federation | Asia      | -            | -          | -           | G3001     | Synthetic | -           | -                           | 9647                      | -        | -        | 59.05      | 68.85      |
| Russian Federation | Asia      | -            | -          | -           | G3002     | Synthetic | -           | -                           | 9463                      | -        | -        | 59.05      | 78.95      |
| Russian Federation | Asia      | -            | -          | -           | G3003     | Synthetic | -           | -                           | 66317                     | -        | -        | 59.05      | 80.65      |
| Russian Federation | Asia      | -            | -          | -           | G3004     | Synthetic | -           | -                           | 22772                     | -        | -        | 59.05      | 91.75      |
| Russian Federation | Asia      | -            | -          | -           | G3005     | Synthetic | -           | -                           | 116786                    | -        | -        | 59.05      | 135.35     |
| Russian Federation | Asia      | -            | -          | -           | G3008     | Synthetic | -           | -                           | 14637                     | -        | -        | 58.95      | 72.35      |
| Russian Federation | Asia      | -            | -          | -           | G3009     | Synthetic | -           | -                           | 47746                     | -        | -        | 58.95      | 79.45      |
| Russian Federation | Asia      | -            | -          | -           | G3010     | Synthetic | -           | -                           | 99729                     | -        | -        | 58.95      | 81.55      |
| Russian Federation | Asia      | -            | -          | -           | G3011     | Synthetic | -           | -                           | 9876                      | -        | -        | 58.95      | 81.85      |
| Russian Federation | Asia      | -            | -          | -           | G3012     | Synthetic | -           | -                           | 1460980                   | -        | -        | 58.95      | 91.75      |
| Russian Federation | Asia      | -            | -          | -           | G3016     | Synthetic | -           | -                           | 8826                      | -        | -        | 58.85      | 68.55      |
| Russian Federation | Asia      | -            | -          | -           | G3017     | Synthetic | -           | -                           | 1027920                   | -        | -        | 58.85      | 68.75      |
| Russian Federation | Asia      | -            | -          | -           | G3018     | Synthetic | -           | -                           | 10181                     | -        | -        | 58.85      | 72.25      |
| Russian Federation | Asia      | -            | -          | -           | G3019     | Synthetic | -           | -                           | 14710                     | -        | -        | 58.85      | 79.45      |
| Russian Federation | Asia      | -            | -          | -           | G3020     | Synthetic | -           | -                           | 530600                    | -        | -        | 58.85      | 81.55      |
| Russian Federation | Asia      | -            | -          | -           | G3021     | Synthetic | -           | -                           | 11241                     | -        | -        | 58.85      | 112.35     |
| Russian Federation | Asia      | -            | -          | -           | G3022     | Synthetic | -           | -                           | 89653                     | -        | -        | 58.75      | 81.85      |
| Russian Federation | Asia      | -            | -          | -           | G3023     | Synthetic | -           | -                           | 9377                      | -        | -        | 58.75      | 86.05      |
| Russian Federation | Asia      | -            | -          | -           | G3024     | Synthetic | -           | -                           | 21206                     | -        | -        | 58.75      | 98.65      |
| Russian Federation | Asia      | -            | -          | -           | G3025     | Synthetic | -           | -                           | 8488                      | -        | -        | 58.75      | 102.75     |
| Russian Federation | Asia      | -            | -          | -           | G3026     | Synthetic | -           | -                           | 23609                     | -        | -        | 58.75      | 118.05     |
| Russian Federation | Asia      | -            | -          | -           | G3027     | Synthetic | -           | -                           | 54098                     | -        | -        | 58.75      | 127.05     |
| Russian Federation | Asia      | -            | -          | -           | G3028     | Synthetic | -           | -                           | 10615                     | -        | -        | 58.75      | 130.15     |
| Russian Federation | Asia      | -            | -          | -           | G3029     | Synthetic | -           | -                           | 26898                     | -        | -        | 58.75      | 134.15     |
| Russian Federation | Asia      | -            | -          | -           | G3033     | Synthetic | -           | -                           | 13255                     | -        | -        | 58.65      | 62.35      |

| Country            | Continent | Station Name | River Name | River Basin | GloFAS ID | Provider  | Provider ID | Catchment Area Provided km² | Catchment Area GloFAS km² | LAT Prov | LON Prov | LAT GloFAS | LON GloFAS |
|--------------------|-----------|--------------|------------|-------------|-----------|-----------|-------------|-----------------------------|---------------------------|----------|----------|------------|------------|
| Russian Federation | Asia      | -            | -          | -           | G3034     | Synthetic | -           | -                           | 8003                      | -        | -        | 58.65      | 85.15      |
| Russian Federation | Asia      | -            | -          | -           | G3035     | Synthetic | -           | -                           | 46596                     | -        | -        | 58.65      | 86.15      |
| Russian Federation | Asia      | -            | -          | -           | G3036     | Synthetic | -           | -                           | 10047                     | -        | -        | 58.65      | 95.85      |
| Russian Federation | Asia      | -            | -          | -           | G3037     | Synthetic | -           | -                           | 859288                    | -        | -        | 58.65      | 98.85      |
| Russian Federation | Asia      | -            | -          | -           | G3038     | Synthetic | -           | -                           | 817778                    | -        | -        | 58.65      | 102.65     |
| Russian Federation | Asia      | -            | -          | -           | G3039     | Synthetic | -           | -                           | 27292                     | -        | -        | 58.65      | 118.15     |
| Russian Federation | Asia      | -            | -          | -           | G3040     | Synthetic | -           | -                           | 46147                     | -        | -        | 58.65      | 127.15     |
| Russian Federation | Asia      | -            | -          | -           | G3041     | Synthetic | -           | -                           | 118238                    | -        | -        | 58.65      | 130.15     |
| Russian Federation | Asia      | -            | -          | -           | G3042     | Synthetic | -           | -                           | 129390                    | -        | -        | 58.65      | 130.55     |
| Russian Federation | Asia      | -            | -          | -           | G3043     | Synthetic | -           | -                           | 116632                    | -        | -        | 58.65      | 130.75     |
| Russian Federation | Asia      | -            | -          | -           | G3044     | Synthetic | -           | -                           | 84237                     | -        | -        | 58.65      | 134.15     |
| Russian Federation | Asia      | -            | -          | -           | G3046     | Synthetic | -           | -                           | 10666                     | -        | -        | 58.55      | 62.35      |
| Russian Federation | Asia      | -            | -          | -           | G3047     | Synthetic | -           | -                           | 61492                     | -        | -        | 58.55      | 85.25      |
| Russian Federation | Asia      | -            | -          | -           | G3048     | Synthetic | -           | -                           | 919469                    | -        | -        | 58.55      | 95.95      |
| Russian Federation | Asia      | -            | -          | -           | G3049     | Synthetic | -           | -                           | 14065                     | -        | -        | 58.55      | 96.85      |
| Russian Federation | Asia      | -            | -          | -           | G3050     | Synthetic | -           | -                           | 881433                    | -        | -        | 58.55      | 98.65      |
| Russian Federation | Asia      | -            | -          | -           | G3053     | Synthetic | -           | -                           | 9292                      | -        | -        | 58.45      | 92.05      |
| Russian Federation | Asia      | -            | -          | -           | G3054     | Synthetic | -           | -                           | 1447270                   | -        | -        | 58.45      | 92.15      |
| Russian Federation | Asia      | -            | -          | -           | G3055     | Synthetic | -           | -                           | 902639                    | -        | -        | 58.45      | 96.85      |
| Russian Federation | Asia      | -            | -          | -           | G3059     | Synthetic | -           | -                           | 497032                    | -        | -        | 58.35      | 82.75      |
| Russian Federation | Asia      | -            | -          | -           | G3060     | Synthetic | -           | -                           | 11174                     | -        | -        | 58.35      | 98.65      |
| Russian Federation | Asia      | -            | -          | -           | G3061     | Synthetic | -           | -                           | 838767                    | -        | -        | 58.35      | 100.35     |
| Russian Federation | Asia      | -            | -          | -           | G3062     | Synthetic | -           | -                           | 7040                      | -        | -        | 58.35      | 133.65     |
| Russian Federation | Asia      | -            | -          | -           | G3065     | Synthetic | -           | -                           | 27285                     | -        | -        | 58.25      | 82.65      |
| Russian Federation | Asia      | -            | -          | -           | G3066     | Synthetic | -           | -                           | 11886                     | -        | -        | 58.25      | 100.35     |
| Russian Federation | Asia      | -            | -          | -           | G3067     | Synthetic | -           | -                           | 147547                    | -        | -        | 58.25      | 109.25     |
| Russian Federation | Asia      | -            | -          | -           | G3068     | Synthetic | -           | -                           | 154700                    | -        | -        | 58.25      | 109.45     |
| Russian Federation | Asia      | -            | -          | -           | G3069     | Synthetic | -           | -                           | 214833                    | -        | -        | 58.25      | 113.05     |
| Russian Federation | Asia      | -            | -          | -           | G3070     | Synthetic | -           | -                           | 8029                      | -        | -        | 58.25      | 123.85     |
| Russian Federation | Asia      | -            | -          | -           | G3071     | Synthetic | -           | -                           | 8543                      | -        | -        | 58.25      | 133.55     |
| Russian Federation | Asia      | -            | -          | -           | G3075     | Synthetic | -           | -                           | 6950                      | -        | -        | 58.15      | 109.25     |
| Russian Federation | Asia      | -            | -          | -           | G3076     | Synthetic | -           | -                           | 11236                     | -        | -        | 58.15      | 109.65     |
| Russian Federation | Asia      | -            | -          | -           | G3077     | Synthetic | -           | -                           | 19022                     | -        | -        | 58.15      | 112.95     |
| Russian Federation | Asia      | -            | -          | -           | G3078     | Synthetic | -           | -                           | 19284                     | -        | -        | 58.15      | 123.85     |
| Russian Federation | Asia      | -            | -          | -           | G3081     | Synthetic | -           | -                           | 8603                      | -        | -        | 58.05      | 80.65      |
| Russian Federation | Asia      | -            | -          | -           | G3083     | Synthetic | -           | -                           | 596453                    | -        | -        | 57.95      | 69.05      |
| Russian Federation | Asia      | -            | -          | -           | G3084     | Synthetic | -           | -                           | 9030                      | -        | -        | 57.95      | 80.45      |
| Russian Federation | Asia      | -            | -          | -           | G3085     | Synthetic | -           | -                           | 23545                     | -        | -        | 57.95      | 136.35     |
| Russian Federation | Asia      | -            | -          | -           | G3088     | Synthetic | -           | -                           | 91326                     | -        | -        | 57.85      | 67.15      |

| Country            | Continent | Station Name | River Name | River Basin | GloFAS ID | Provider  | Provider ID | Catchment Area Provided km² | Catchment Area GloFAS km² | LAT Prov | LON Prov | LAT GloFAS | LON GloFAS |
|--------------------|-----------|--------------|------------|-------------|-----------|-----------|-------------|-----------------------------|---------------------------|----------|----------|------------|------------|
| Russian Federation | Asia      | -            | -          | -           | G3089     | Synthetic | -           | -                           | 25184                     | -        | -        | 57.85      | 69.05      |
| Russian Federation | Asia      | -            | -          | -           | G3090     | Synthetic | -           | -                           | 200270                    | -        | -        | 57.85      | 114.05     |
| Russian Federation | Asia      | -            | -          | -           | G3091     | Synthetic | -           | -                           | 11551                     | -        | -        | 57.85      | 123.75     |
| Russian Federation | Asia      | -            | -          | -           | G3094     | Synthetic | -           | -                           | 305590                    | -        | -        | 57.75      | 67.15      |
| Russian Federation | Asia      | -            | -          | -           | G3095     | Synthetic | -           | -                           | 58260                     | -        | -        | 57.75      | 95.55      |
| Russian Federation | Asia      | -            | -          | -           | G3096     | Synthetic | -           | -                           | 18952                     | -        | -        | 57.75      | 136.45     |
| Russian Federation | Asia      | -            | -          | -           | G3098     | Synthetic | -           | -                           | 56637                     | -        | -        | 57.65      | 95.45      |
| Russian Federation | Asia      | -            | -          | -           | G3099     | Synthetic | -           | -                           | 768315                    | -        | -        | 57.65      | 102.55     |
| Russian Federation | Asia      | -            | -          | -           | G3100     | Synthetic | -           | -                           | 9598                      | -        | -        | 57.65      | 113.95     |
| Russian Federation | Asia      | -            | -          | -           | G3101     | Synthetic | -           | -                           | 53667                     | -        | -        | 57.65      | 135.55     |
| Russian Federation | Asia      | -            | -          | -           | G3105     | Synthetic | -           | -                           | 33591                     | -        | -        | 57.55      | 64.55      |
| Russian Federation | Asia      | -            | -          | -           | G3106     | Synthetic | -           | -                           | 9035                      | -        | -        | 57.55      | 72.55      |
| Russian Federation | Asia      | -            | -          | -           | G3107     | Synthetic | -           | -                           | 8989                      | -        | -        | 57.55      | 82.15      |
| Russian Federation | Asia      | -            | -          | -           | G3108     | Synthetic | -           | -                           | 18980                     | -        | -        | 57.55      | 135.45     |
| Russian Federation | Asia      | -            | -          | -           | G3109     | Synthetic | -           | -                           | 45045                     | -        | -        | 57.55      | 136.05     |
| Russian Federation | Asia      | -            | -          | -           | G3110     | Synthetic | -           | -                           | 22579                     | -        | -        | 57.45      | 64.45      |
| Russian Federation | Asia      | -            | -          | -           | G3111     | Synthetic | -           | -                           | 430229                    | -        | -        | 57.45      | 72.55      |
| Russian Federation | Asia      | -            | -          | -           | G3112     | Synthetic | -           | -                           | 114097                    | -        | -        | 57.45      | 85.85      |
| Russian Federation | Asia      | -            | -          | -           | G3113     | Synthetic | -           | -                           | 9673                      | -        | -        | 57.45      | 103.05     |
| Russian Federation | Asia      | -            | -          | -           | G3114     | Synthetic | -           | -                           | 7658                      | -        | -        | 57.45      | 135.95     |
| Russian Federation | Asia      | -            | -          | -           | G3116     | Synthetic | -           | -                           | 336424                    | -        | -        | 57.35      | 84.05      |
| Russian Federation | Asia      | -            | -          | -           | G3119     | Synthetic | -           | -                           | 82604                     | -        | -        | 57.25      | 66.85      |
| Russian Federation | Asia      | -            | -          | -           | G3120     | Synthetic | -           | -                           | 389677                    | -        | -        | 57.25      | 73.75      |
| Russian Federation | Asia      | -            | -          | -           | G3121     | Synthetic | -           | -                           | 12370                     | -        | -        | 57.25      | 84.05      |
| Russian Federation | Asia      | -            | -          | -           | G3122     | Synthetic | -           | -                           | 10856                     | -        | -        | 57.25      | 90.55      |
| Russian Federation | Asia      | -            | -          | -           | G3123     | Synthetic | -           | -                           | 27881                     | -        | -        | 57.25      | 103.05     |
| Russian Federation | Asia      | -            | -          | -           | G3124     | Synthetic | -           | -                           | 35021                     | -        | -        | 57.25      | 131.05     |
| Russian Federation | Asia      | -            | -          | -           | G3125     | Synthetic | -           | -                           | 57164                     | -        | -        | 57.25      | 131.15     |
| Russian Federation | Asia      | -            | -          | -           | G3126     | Synthetic | -           | -                           | 33854                     | -        | -        | 57.25      | 131.35     |
| Russian Federation | Asia      | -            | -          | -           | G3128     | Synthetic | -           | -                           | 61628                     | -        | -        | 57.15      | 66.15      |
| Russian Federation | Asia      | -            | -          | -           | G3129     | Synthetic | -           | -                           | 217886                    | -        | -        | 57.15      | 66.95      |
| Russian Federation | Asia      | -            | -          | -           | G3130     | Synthetic | -           | -                           | 32874                     | -        | -        | 57.15      | 73.65      |
| Russian Federation | Asia      | -            | -          | -           | G3131     | Synthetic | -           | -                           | 42101                     | -        | -        | 57.15      | 90.55      |
| Russian Federation | Asia      | -            | -          | -           | G3132     | Synthetic | -           | -                           | 22004                     | -        | -        | 57.15      | 131.15     |
| Russian Federation | Asia      | -            | -          | -           | G3133     | Synthetic | -           | -                           | 9455                      | -        | -        | 57.15      | 131.45     |
| Russian Federation | Asia      | -            | -          | -           | G3137     | Synthetic | -           | -                           | 19865                     | -        | -        | 57.05      | 66.25      |
| Russian Federation | Asia      | -            | -          | -           | G3138     | Synthetic | -           | -                           | 12201                     | -        | -        | 57.05      | 131.35     |
| Russian Federation | Asia      | -            | -          | -           | G3143     | Synthetic | -           | -                           | 381932                    | -        | -        | 56.95      | 74.25      |
| Russian Federation | Asia      | -            | -          | -           | G3144     | Synthetic | -           | -                           | 97732                     | -        | -        | 56.95      | 86.45      |

| Country            | Continent | Station Name | River Name | River Basin | GloFAS ID | Provider  | Provider ID | Catchment Area Provided km² | Catchment Area GloFAS km² | LAT Prov | LON Prov | LAT GloFAS | LON GloFAS |
|--------------------|-----------|--------------|------------|-------------|-----------|-----------|-------------|-----------------------------|---------------------------|----------|----------|------------|------------|
| Russian Federation | Asia      | -            | -          | -           | G3145     | Synthetic | -           | -                           | 63492                     | -        | -        | 56.95      | 86.65      |
| Russian Federation | Asia      | -            | -          | -           | G3146     | Synthetic | -           | -                           | 22839                     | -        | -        | 56.95      | 132.25     |
| Russian Federation | Asia      | -            | -          | -           | G3151     | Synthetic | -           | -                           | 11848                     | -        | -        | 56.85      | 86.25      |
| Russian Federation | Asia      | -            | -          | -           | G3152     | Synthetic | -           | -                           | 33328                     | -        | -        | 56.85      | 86.75      |
| Russian Federation | Asia      | -            | -          | -           | G3153     | Synthetic | -           | -                           | 14258                     | -        | -        | 56.85      | 86.95      |
| Russian Federation | Asia      | -            | -          | -           | G3154     | Synthetic | -           | -                           | 36891                     | -        | -        | 56.85      | 97.85      |
| Russian Federation | Asia      | -            | -          | -           | G3155     | Synthetic | -           | -                           | 7342                      | -        | -        | 56.85      | 132.05     |
| Russian Federation | Asia      | -            | -          | -           | G3156     | Synthetic | -           | -                           | 270196                    | -        | -        | 56.75      | 84.35      |
| Russian Federation | Asia      | -            | -          | -           | G3157     | Synthetic | -           | -                           | 63234                     | -        | -        | 56.75      | 84.55      |
| Russian Federation | Asia      | -            | -          | -           | G3158     | Synthetic | -           | -                           | 18930                     | -        | -        | 56.75      | 86.95      |
| Russian Federation | Asia      | -            | -          | -           | G3159     | Synthetic | -           | -                           | 8959                      | -        | -        | 56.75      | 97.75      |
| Russian Federation | Asia      | -            | -          | -           | G3160     | Synthetic | -           | -                           | 13000                     | -        | -        | 56.75      | 105.55     |
| Russian Federation | Asia      | -            | -          | -           | G3162     | Synthetic | -           | -                           | 59918                     | -        | -        | 56.65      | 105.65     |
| Russian Federation | Asia      | -            | -          | -           | G3163     | Synthetic | -           | -                           | 12234                     | -        | -        | 56.65      | 128.55     |
| Russian Federation | Asia      | -            | -          | -           | G3165     | Synthetic | -           | -                           | 361211                    | -        | -        | 56.55      | 74.55      |
| Russian Federation | Asia      | -            | -          | -           | G3166     | Synthetic | -           | -                           | 18474                     | -        | -        | 56.55      | 74.75      |
| Russian Federation | Asia      | -            | -          | -           | G3167     | Synthetic | -           | -                           | 33136                     | -        | -        | 56.55      | 121.65     |
| Russian Federation | Asia      | -            | -          | -           | G3168     | Synthetic | -           | -                           | 14519                     | -        | -        | 56.55      | 128.65     |
| Russian Federation | Asia      | -            | -          | -           | G3170     | Synthetic | -           | -                           | 317163                    | -        | -        | 56.45      | 93.65      |
| Russian Federation | Asia      | -            | -          | -           | G3171     | Synthetic | -           | -                           | 37962                     | -        | -        | 56.45      | 93.85      |
| Russian Federation | Asia      | -            | -          | -           | G3172     | Synthetic | -           | -                           | 11912                     | -        | -        | 56.45      | 115.55     |
| Russian Federation | Asia      | -            | -          | -           | G3173     | Synthetic | -           | -                           | 48077                     | -        | -        | 56.45      | 121.55     |
| Russian Federation | Asia      | -            | -          | -           | G3174     | Synthetic | -           | -                           | 9422                      | -        | -        | 56.45      | 160.65     |
| Russian Federation | Asia      | -            | -          | -           | G3176     | Synthetic | -           | -                           | 38398                     | -        | -        | 56.35      | 160.55     |
| Russian Federation | Asia      | -            | -          | -           | G3181     | Synthetic | -           | -                           | 12618                     | -        | -        | 56.25      | 62.75      |
| Russian Federation | Asia      | -            | -          | -           | G3182     | Synthetic | -           | -                           | 153662                    | -        | -        | 56.25      | 115.65     |
| Russian Federation | Asia      | -            | -          | -           | G3188     | Synthetic | -           | -                           | 16932                     | -        | -        | 56.15      | 57.75      |
| Russian Federation | Asia      | -            | -          | -           | G3189     | Synthetic | -           | -                           | 8706                      | -        | -        | 56.15      | 62.75      |
| Russian Federation | Asia      | -            | -          | -           | G3197     | Synthetic | -           | -                           | 29661                     | -        | -        | 56.05      | 64.35      |
| Russian Federation | Asia      | -            | -          | -           | G3198     | Synthetic | -           | -                           | 74532                     | -        | -        | 56.05      | 101.75     |
| Russian Federation | Asia      | -            | -          | -           | G3203     | Synthetic | -           | -                           | 21680                     | -        | -        | 55.95      | 64.45      |
| Russian Federation | Asia      | -            | -          | -           | G3206     | Synthetic | -           | -                           | 9413                      | -        | -        | 55.85      | 92.55      |
| Russian Federation | Asia      | -            | -          | -           | G3207     | Synthetic | -           | -                           | 7985                      | -        | -        | 55.85      | 107.95     |
| Russian Federation | Asia      | -            | -          | -           | G3214     | Synthetic | -           | -                           | 16556                     | -        | -        | 55.75      | 76.75      |
| Russian Federation | Asia      | -            | -          | -           | G3215     | Synthetic | -           | -                           | 16616                     | -        | -        | 55.75      | 107.75     |
| Russian Federation | Asia      | -            | -          | -           | G3216     | Synthetic | -           | -                           | 22865                     | -        | -        | 55.75      | 159.75     |
| Russian Federation | Asia      | -            | -          | -           | G3220     | Synthetic | -           | -                           | 29926                     | -        | -        | 55.65      | 76.85      |
| Russian Federation | Asia      | -            | -          | -           | G3221     | Synthetic | -           | -                           | 9304                      | -        | -        | 55.65      | 95.65      |
| Russian Federation | Asia      | -            | -          | -           | G3222     | Synthetic | -           | -                           | 11575                     | -        | -        | 55.65      | 95.75      |

| Country            | Continent | Station Name | River Name | River Basin | GloFAS ID | Provider  | Provider ID | Catchment Area Provided km² | Catchment Area GloFAS km² | LAT Prov | LON Prov | LAT GloFAS | LON GloFAS |
|--------------------|-----------|--------------|------------|-------------|-----------|-----------|-------------|-----------------------------|---------------------------|----------|----------|------------|------------|
| Russian Federation | Asia      | -            | -          | -           | G3232     | Synthetic | -           | -                           | 8270                      | -        | -        | 55.55      | 97.65      |
| Russian Federation | Asia      | -            | -          | -           | G3236     | Synthetic | -           | -                           | 10543                     | -        | -        | 55.45      | 97.85      |
| Russian Federation | Asia      | -            | -          | -           | G3237     | Synthetic | -           | -                           | 18202                     | -        | -        | 55.45      | 116.45     |
| Russian Federation | Asia      | -            | -          | -           | G3240     | Synthetic | -           | -                           | 43455                     | -        | -        | 55.35      | 115.85     |
| Russian Federation | Asia      | -            | -          | -           | G3241     | Synthetic | -           | -                           | 99071                     | -        | -        | 55.35      | 116.05     |
| Russian Federation | Asia      | -            | -          | -           | G3242     | Synthetic | -           | -                           | 23216                     | -        | -        | 55.35      | 120.35     |
| Russian Federation | Asia      | -            | -          | -           | G3248     | Synthetic | -           | -                           | 79998                     | -        | -        | 55.25      | 116.45     |
| Russian Federation | Asia      | -            | -          | -           | G3249     | Synthetic | -           | -                           | 14974                     | -        | -        | 55.25      | 120.45     |
| Russian Federation | Asia      | -            | -          | -           | G3252     | Synthetic | -           | -                           | 10894                     | -        | -        | 55.15      | 116.75     |
| Russian Federation | Asia      | -            | -          | -           | G3258     | Synthetic | -           | -                           | 68081                     | -        | -        | 55.05      | 116.75     |
| Russian Federation | Asia      | -            | -          | -           | G3263     | Synthetic | -           | -                           | 65966                     | -        | -        | 54.95      | 73.45      |
| Russian Federation | Asia      | -            | -          | -           | G3264     | Synthetic | -           | -                           | 18372                     | -        | -        | 54.95      | 83.15      |
| Russian Federation | Asia      | -            | -          | -           | G3265     | Synthetic | -           | -                           | 10534                     | -        | -        | 54.95      | 104.95     |
| Russian Federation | Asia      | -            | -          | -           | G3269     | Synthetic | -           | -                           | 260818                    | -        | -        | 54.85      | 73.35      |
| Russian Federation | Asia      | -            | -          | -           | G3270     | Synthetic | -           | -                           | 233832                    | -        | -        | 54.85      | 82.95      |
| Russian Federation | Asia      | -            | -          | -           | G3271     | Synthetic | -           | -                           | 30733                     | -        | -        | 54.85      | 105.05     |
| Russian Federation | Asia      | -            | -          | -           | G3272     | Synthetic | -           | -                           | 20138                     | -        | -        | 54.85      | 115.15     |
| Russian Federation | Asia      | -            | -          | -           | G3276     | Synthetic | -           | -                           | 9094                      | -        | -        | 54.75      | 83.05      |
| Russian Federation | Asia      | -            | -          | -           | G3277     | Synthetic | -           | -                           | 15033                     | -        | -        | 54.75      | 115.25     |
| Russian Federation | Asia      | -            | -          | -           | G3283     | Synthetic | -           | -                           | 8751                      | -        | -        | 54.65      | 78.05      |
| Russian Federation | Asia      | -            | -          | -           | G3284     | Synthetic | -           | -                           | 22854                     | -        | -        | 54.65      | 105.25     |
| Russian Federation | Asia      | -            | -          | -           | G3288     | Synthetic | -           | -                           | 53641                     | -        | -        | 54.55      | 116.55     |
| Russian Federation | Asia      | -            | -          | -           | G3289     | Synthetic | -           | -                           | 16012                     | -        | -        | 54.55      | 134.55     |
| Russian Federation | Asia      | -            | -          | -           | G3292     | Synthetic | -           | -                           | 82712                     | -        | -        | 54.45      | 64.65      |
| Russian Federation | Asia      | -            | -          | -           | G3293     | Synthetic | -           | -                           | 12115                     | -        | -        | 54.45      | 78.05      |
| Russian Federation | Asia      | -            | -          | -           | G3294     | Synthetic | -           | -                           | 10613                     | -        | -        | 54.45      | 116.55     |
| Russian Federation | Asia      | -            | -          | -           | G3295     | Synthetic | -           | -                           | 39000                     | -        | -        | 54.45      | 134.55     |
| Russian Federation | Asia      | -            | -          | -           | G3308     | Synthetic | -           | -                           | 11400                     | -        | -        | 54.15      | 132.95     |
| Russian Federation | Asia      | -            | -          | -           | G3310     | Synthetic | -           | -                           | 17473                     | -        | -        | 54.05      | 62.55      |
| Russian Federation | Asia      | -            | -          | -           | G3311     | Synthetic | -           | -                           | 23097                     | -        | -        | 54.05      | 127.35     |
| Russian Federation | Asia      | -            | -          | -           | G3312     | Synthetic | -           | -                           | 60566                     | -        | -        | 54.05      | 127.55     |
| Russian Federation | Asia      | -            | -          | -           | G3313     | Synthetic | -           | -                           | 8012                      | -        | -        | 54.05      | 133.05     |
| Russian Federation | Asia      | -            | -          | -           | G3319     | Synthetic | -           | -                           | 8382                      | -        | -        | 53.95      | 62.55      |
| Russian Federation | Asia      | -            | -          | -           | G3320     | Synthetic | -           | -                           | 9382                      | -        | -        | 53.95      | 93.15      |
| Russian Federation | Asia      | -            | -          | -           | G3321     | Synthetic | -           | -                           | 12636                     | -        | -        | 53.85      | 93.15      |
| Russian Federation | Asia      | -            | -          | -           | G3324     | Synthetic | -           | -                           | 21295                     | -        | -        | 53.75      | 87.25      |
| Russian Federation | Asia      | -            | -          | -           | G3325     | Synthetic | -           | -                           | 10013                     | -        | -        | 53.75      | 87.85      |
| Russian Federation | Asia      | -            | -          | -           | G3326     | Synthetic | -           | -                           | 200514                    | -        | -        | 53.75      | 91.55      |
| Russian Federation | Asia      | -            | -          | -           | G3330     | Synthetic | -           | -                           | 24191                     | -        | -        | 53.65      | 83.15      |

| Country            | Continent | Station Name | River Name | River Basin | GloFAS ID | Provider  | Provider ID | Catchment Area Provided km² | Catchment Area GloFAS km² | LAT Prov | LON Prov | LAT GloFAS | LON GloFAS |
|--------------------|-----------|--------------|------------|-------------|-----------|-----------|-------------|-----------------------------|---------------------------|----------|----------|------------|------------|
| Russian Federation | Asia      | -            | -          | -           | G3331     | Synthetic | -           | -                           | 8191                      | -        | -        | 53.65      | 87.25      |
| Russian Federation | Asia      | -            | -          | -           | G3332     | Synthetic | -           | -                           | 9030                      | -        | -        | 53.65      | 87.85      |
| Russian Federation | Asia      | -            | -          | -           | G3333     | Synthetic | -           | -                           | 33214                     | -        | -        | 53.65      | 91.45      |
| Russian Federation | Asia      | -            | -          | -           | G3334     | Synthetic | -           | -                           | 9953                      | -        | -        | 53.65      | 123.35     |
| Russian Federation | Asia      | -            | -          | -           | G3338     | Synthetic | -           | -                           | 8363                      | -        | -        | 53.55      | 78.25      |
| Russian Federation | Asia      | -            | -          | -           | G3339     | Synthetic | -           | -                           | 8447                      | -        | -        | 53.55      | 78.45      |
| Russian Federation | Asia      | -            | -          | -           | G3340     | Synthetic | -           | -                           | 11168                     | -        | -        | 53.55      | 121.85     |
| Russian Federation | Asia      | -            | -          | -           | G3345     | Synthetic | -           | -                           | 181982                    | -        | -        | 53.45      | 83.25      |
| Russian Federation | Asia      | -            | -          | -           | G3346     | Synthetic | -           | -                           | 29224                     | -        | -        | 53.45      | 113.45     |
| Russian Federation | Asia      | -            | -          | -           | G3347     | Synthetic | -           | -                           | 206060                    | -        | -        | 53.45      | 121.35     |
| Russian Federation | Asia      | -            | -          | -           | G3348     | Synthetic | -           | -                           | 439167                    | -        | -        | 53.45      | 121.85     |
| Russian Federation | Asia      | -            | -          | -           | G3349     | Synthetic | -           | -                           | 474027                    | -        | -        | 53.45      | 123.95     |
| Russian Federation | Asia      | -            | -          | -           | G3350     | Synthetic | -           | -                           | 16827                     | -        | -        | 53.45      | 126.85     |
| Russian Federation | Asia      | -            | -          | -           | G3351     | Synthetic | -           | -                           | 86597                     | -        | -        | 53.45      | 126.95     |
| Russian Federation | Asia      | -            | -          | -           | G3353     | Synthetic | -           | -                           | 10375                     | -        | -        | 53.35      | 113.55     |
| Russian Federation | Asia      | -            | -          | -           | G3354     | Synthetic | -           | -                           | 230054                    | -        | -        | 53.35      | 121.35     |
| Russian Federation | Asia      | -            | -          | -           | G3357     | Synthetic | -           | -                           | 168689                    | -        | -        | 53.25      | 83.75      |
| Russian Federation | Asia      | -            | -          | -           | G3360     | Synthetic | -           | -                           | 12141                     | -        | -        | 52.95      | 118.95     |
| Russian Federation | Asia      | -            | -          | -           | G3361     | Synthetic | -           | -                           | 12282                     | -        | -        | 52.95      | 120.25     |
| Russian Federation | Asia      | -            | -          | -           | G3362     | Synthetic | -           | -                           | 107684                    | -        | -        | 52.95      | 127.65     |
| Russian Federation | Asia      | -            | -          | -           | G3363     | Synthetic | -           | -                           | 10747                     | -        | -        | 52.95      | 127.75     |
| Russian Federation | Asia      | -            | -          | -           | G3364     | Synthetic | -           | -                           | 56897                     | -        | -        | 52.95      | 139.65     |
| Russian Federation | Asia      | -            | -          | -           | G3365     | Synthetic | -           | -                           | 1911080                   | -        | -        | 52.95      | 139.75     |
| Russian Federation | Asia      | -            | -          | -           | G3368     | Synthetic | -           | -                           | 19532                     | -        | -        | 52.85      | 83.55      |
| Russian Federation | Asia      | -            | -          | -           | G3369     | Synthetic | -           | -                           | 18865                     | -        | -        | 52.85      | 103.55     |
| Russian Federation | Asia      | -            | -          | -           | G3370     | Synthetic | -           | -                           | 619309                    | -        | -        | 52.85      | 103.65     |
| Russian Federation | Asia      | -            | -          | -           | G3371     | Synthetic | -           | -                           | 185500                    | -        | -        | 52.85      | 118.95     |
| Russian Federation | Asia      | -            | -          | -           | G3372     | Synthetic | -           | -                           | 214646                    | -        | -        | 52.85      | 120.25     |
| Russian Federation | Asia      | -            | -          | -           | G3376     | Synthetic | -           | -                           | 145569                    | -        | -        | 52.75      | 83.65      |
| Russian Federation | Asia      | -            | -          | -           | G3377     | Synthetic | -           | -                           | 19705                     | -        | -        | 52.75      | 95.85      |
| Russian Federation | Asia      | -            | -          | -           | G3379     | Synthetic | -           | -                           | 17719                     | -        | -        | 52.65      | 95.85      |
| Russian Federation | Asia      | -            | -          | -           | G3380     | Synthetic | -           | -                           | 609280                    | -        | -        | 52.65      | 103.95     |
| Russian Federation | Asia      | -            | -          | -           | G3386     | Synthetic | -           | -                           | 37020                     | -        | -        | 52.55      | 85.25      |
| Russian Federation | Asia      | -            | -          | -           | G3387     | Synthetic | -           | -                           | 9107                      | -        | -        | 52.55      | 103.85     |
| Russian Federation | Asia      | -            | -          | -           | G3388     | Synthetic | -           | -                           | 16730                     | -        | -        | 52.55      | 130.05     |
| Russian Federation | Asia      | -            | -          | -           | G3391     | Synthetic | -           | -                           | 99730                     | -        | -        | 52.45      | 84.95      |
| Russian Federation | Asia      | -            | -          | -           | G3392     | Synthetic | -           | -                           | 60372                     | -        | -        | 52.45      | 85.25      |
| Russian Federation | Asia      | -            | -          | -           | G3393     | Synthetic | -           | -                           | 8363                      | -        | -        | 52.45      | 104.15     |
| Russian Federation | Asia      | -            | -          | -           | G3394     | Synthetic | -           | -                           | 29051                     | -        | -        | 52.45      | 130.05     |

| Country            | Continent | Station Name | River Name | River Basin | GloFAS ID | Provider  | Provider ID | Catchment Area Provided km² | Catchment Area GloFAS km² | LAT Prov | LON Prov | LAT GloFAS | LON GloFAS |
|--------------------|-----------|--------------|------------|-------------|-----------|-----------|-------------|-----------------------------|---------------------------|----------|----------|------------|------------|
| Russian Federation | Asia      | -            | -          | -           | G3396     | Synthetic | -           | -                           | 116775                    | -        | -        | 52.35      | 83.85      |
| Russian Federation | Asia      | -            | -          | -           | G3397     | Synthetic | -           | -                           | 598990                    | -        | -        | 52.35      | 104.25     |
| Russian Federation | Asia      | -            | -          | -           | G3398     | Synthetic | -           | -                           | 22428                     | -        | -        | 52.35      | 136.55     |
| Russian Federation | Asia      | -            | -          | -           | G3400     | Synthetic | -           | -                           | 22102                     | -        | -        | 52.25      | 83.65      |
| Russian Federation | Asia      | -            | -          | -           | G3401     | Synthetic | -           | -                           | 15102                     | -        | -        | 52.25      | 104.15     |
| Russian Federation | Asia      | -            | -          | -           | G3402     | Synthetic | -           | -                           | 583500                    | -        | -        | 52.25      | 104.35     |
| Russian Federation | Asia      | -            | -          | -           | G3403     | Synthetic | -           | -                           | 13239                     | -        | -        | 52.25      | 140.25     |
| Russian Federation | Asia      | -            | -          | -           | G3408     | Synthetic | -           | -                           | 11457                     | -        | -        | 52.15      | 129.35     |
| Russian Federation | Asia      | -            | -          | -           | G3409     | Synthetic | -           | -                           | 50060                     | -        | -        | 52.15      | 129.45     |
| Russian Federation | Asia      | -            | -          | -           | G3410     | Synthetic | -           | -                           | 1885340                   | -        | -        | 52.15      | 140.25     |
| Russian Federation | Asia      | -            | -          | -           | G3419     | Synthetic | -           | -                           | 28154                     | -        | -        | 51.95      | 116.55     |
| Russian Federation | Asia      | -            | -          | -           | G3420     | Synthetic | -           | -                           | 180588                    | -        | -        | 51.95      | 120.65     |
| Russian Federation | Asia      | -            | -          | -           | G3427     | Synthetic | -           | -                           | 35578                     | -        | -        | 51.85      | 107.65     |
| Russian Federation | Asia      | -            | -          | -           | G3428     | Synthetic | -           | -                           | 135916                    | -        | -        | 51.85      | 116.55     |
| Russian Federation | Asia      | -            | -          | -           | G3429     | Synthetic | -           | -                           | 131095                    | -        | -        | 51.85      | 128.75     |
| Russian Federation | Asia      | -            | -          | -           | G3434     | Synthetic | -           | -                           | 28265                     | -        | -        | 51.75      | 92.05      |
| Russian Federation | Asia      | -            | -          | -           | G3435     | Synthetic | -           | -                           | 136706                    | -        | -        | 51.75      | 92.25      |
| Russian Federation | Asia      | -            | -          | -           | G3436     | Synthetic | -           | -                           | 38237                     | -        | -        | 51.75      | 115.75     |
| Russian Federation | Asia      | -            | -          | -           | G3437     | Synthetic | -           | -                           | 515963                    | -        | -        | 51.75      | 126.65     |
| Russian Federation | Asia      | -            | -          | -           | G3438     | Synthetic | -           | -                           | 69606                     | -        | -        | 51.75      | 128.95     |
| Russian Federation | Asia      | -            | -          | -           | G3444     | Synthetic | -           | -                           | 94702                     | -        | -        | 51.65      | 115.75     |
| Russian Federation | Asia      | -            | -          | -           | G3454     | Synthetic | -           | -                           | 85256                     | -        | -        | 51.55      | 115.95     |
| Russian Federation | Asia      | -            | -          | -           | G3460     | Synthetic | -           | -                           | 8659                      | -        | -        | 51.45      | 115.75     |
| Russian Federation | Asia      | -            | -          | -           | G3461     | Synthetic | -           | -                           | 17001                     | -        | -        | 51.45      | 132.65     |
| Russian Federation | Asia      | -            | -          | -           | G3462     | Synthetic | -           | -                           | 9897                      | -        | -        | 51.45      | 132.85     |
| Russian Federation | Asia      | -            | -          | -           | G3466     | Synthetic | -           | -                           | 28497                     | -        | -        | 51.35      | 97.05      |
| Russian Federation | Asia      | -            | -          | -           | G3467     | Synthetic | -           | -                           | 75146                     | -        | -        | 51.35      | 116.05     |
| Russian Federation | Asia      | -            | -          | -           | G3468     | Synthetic | -           | -                           | 9400                      | -        | -        | 51.35      | 116.15     |
| Russian Federation | Asia      | -            | -          | -           | G3476     | Synthetic | -           | -                           | 12771                     | -        | -        | 51.25      | 96.95      |
| Russian Federation | Asia      | -            | -          | -           | G3477     | Synthetic | -           | -                           | 365796                    | -        | -        | 51.25      | 106.85     |
| Russian Federation | Asia      | -            | -          | -           | G3486     | Synthetic | -           | -                           | 319419                    | -        | -        | 51.05      | 106.55     |
| Russian Federation | Asia      | -            | -          | -           | G3487     | Synthetic | -           | -                           | 215055                    | -        | -        | 51.05      | 127.85     |
| Russian Federation | Asia      | -            | -          | -           | G3490     | Synthetic | -           | -                           | 14797                     | -        | -        | 50.95      | 54.65      |
| Russian Federation | Asia      | -            | -          | -           | G3491     | Synthetic | -           | -                           | 45821                     | -        | -        | 50.95      | 106.65     |
| Russian Federation | Asia      | -            | -          | -           | G3492     | Synthetic | -           | -                           | 15552                     | -        | -        | 50.95      | 127.95     |
| Russian Federation | Asia      | -            | -          | -           | G3497     | Synthetic | -           | -                           | 22271                     | -        | -        | 50.75      | 137.55     |
| Russian Federation | Asia      | -            | -          | -           | G3503     | Synthetic | -           | -                           | 24058                     | -        | -        | 50.65      | 106.15     |
| Russian Federation | Asia      | -            | -          | -           | G3504     | Synthetic | -           | -                           | 1847210                   | -        | -        | 50.65      | 137.55     |
| Russian Federation | Asia      | -            | -          | -           | G3506     | Synthetic | -           | -                           | 287085                    | -        | -        | 50.55      | 106.25     |

| Country            | Continent | Station Name | River Name | River Basin | GloFAS ID | Provider  | Provider ID | Catchment Area Provided km² | Catchment Area GloFAS km² | LAT Prov | LON Prov | LAT GloFAS | LON GloFAS |
|--------------------|-----------|--------------|------------|-------------|-----------|-----------|-------------|-----------------------------|---------------------------|----------|----------|------------|------------|
| Russian Federation | Asia      | -            | -          | -           | G3507     | Synthetic | -           | -                           | 47712                     | -        | -        | 50.55      | 131.35     |
| Russian Federation | Asia      | -            | -          | -           | G3509     | Synthetic | -           | -                           | 15216                     | -        | -        | 50.45      | 131.45     |
| Russian Federation | Asia      | -            | -          | -           | G3516     | Synthetic | -           | -                           | 11470                     | -        | -        | 50.35      | 86.75      |
| Russian Federation | Asia      | -            | -          | -           | G3518     | Synthetic | -           | -                           | 8968                      | -        | -        | 50.35      | 119.05     |
| Russian Federation | Asia      | -            | -          | -           | G3520     | Synthetic | -           | -                           | 238248                    | -        | -        | 50.35      | 127.65     |
| Russian Federation | Asia      | -            | -          | -           | G3530     | Synthetic | -           | -                           | 25213                     | -        | -        | 50.25      | 86.65      |
| Russian Federation | Asia      | -            | -          | -           | G3538     | Synthetic | -           | -                           | 15079                     | -        | -        | 50.15      | 86.55      |
| Russian Federation | Asia      | -            | -          | -           | G3539     | Synthetic | -           | -                           | 9972                      | -        | -        | 50.15      | 86.65      |
| Russian Federation | Asia      | -            | -          | -           | G3543     | Synthetic | -           | -                           | 1828590                   | -        | -        | 50.05      | 136.85     |
| Russian Federation | Asia      | -            | -          | -           | G3544     | Synthetic | -           | -                           | 12256                     | -        | -        | 50.05      | 136.95     |
| Russian Federation | Asia      | -            | -          | -           | G3553     | Synthetic | -           | -                           | 14877                     | -        | -        | 49.85      | 136.65     |
| Russian Federation | Asia      | -            | -          | -           | G3566     | Synthetic | -           | -                           | 70874                     | -        | -        | 49.65      | 117.95     |
| Russian Federation | Asia      | -            | -          | -           | G3578     | Synthetic | -           | -                           | 842011                    | -        | -        | 49.45      | 129.45     |
| Russian Federation | Asia      | -            | -          | -           | G3579     | Synthetic | -           | -                           | 71854                     | -        | -        | 49.45      | 129.55     |
| Russian Federation | Asia      | -            | -          | -           | G3587     | Synthetic | -           | -                           | 23249                     | -        | -        | 49.35      | 136.45     |
| Russian Federation | Asia      | -            | -          | -           | G3588     | Synthetic | -           | -                           | 12985                     | -        | -        | 49.35      | 136.55     |
| Russian Federation | Asia      | -            | -          | -           | G3597     | Synthetic | -           | -                           | 9159                      | -        | -        | 49.25      | 129.85     |
| Russian Federation | Asia      | -            | -          | -           | G3598     | Synthetic | -           | -                           | 1786140                   | -        | -        | 49.25      | 136.35     |
| Russian Federation | Asia      | -            | -          | -           | G3599     | Synthetic | -           | -                           | 10182                     | -        | -        | 49.25      | 136.45     |
| Russian Federation | Asia      | -            | -          | -           | G3626     | Synthetic | -           | -                           | 11910                     | -        | -        | 48.85      | 134.25     |
| Russian Federation | Asia      | -            | -          | -           | G3635     | Synthetic | -           | -                           | 14843                     | -        | -        | 48.65      | 134.25     |
| Russian Federation | Asia      | -            | -          | -           | G3636     | Synthetic | -           | -                           | 30738                     | -        | -        | 48.65      | 134.95     |
| Russian Federation | Asia      | -            | -          | -           | G3663     | Synthetic | -           | -                           | 11547                     | -        | -        | 48.15      | 133.25     |
| Russian Federation | Asia      | -            | -          | -           | G3676     | Synthetic | -           | -                           | 25205                     | -        | -        | 47.85      | 134.75     |
| Russian Federation | Asia      | -            | -          | -           | G3723     | Synthetic | -           | -                           | 22200                     | -        | -        | 46.85      | 134.15     |
| Russian Federation | Asia      | -            | -          | -           | G3729     | Synthetic | -           | -                           | 111401                    | -        | -        | 46.75      | 134.05     |
| Russian Federation | Asia      | -            | -          | -           | G3763     | Synthetic | -           | -                           | 30053                     | -        | -        | 45.95      | 133.75     |
| Russian Federation | Asia      | -            | -          | -           | G3796     | Synthetic | -           | -                           | 27715                     | -        | -        | 45.55      | 133.45     |
| Saudi Arabia       | Asia      | -            | -          | -           | G4537     | Synthetic | -           | -                           | 34604                     | -        | -        | 25.75      | 42.35      |
| Saudi Arabia       | Asia      | -            | -          | -           | G4547     | Synthetic | -           | -                           | 20908                     | -        | -        | 25.65      | 38.35      |
| Saudi Arabia       | Asia      | -            | -          | -           | G4552     | Synthetic | -           | -                           | 74870                     | -        | -        | 25.55      | 38.45      |
| Saudi Arabia       | Asia      | -            | -          | -           | G4553     | Synthetic | -           | -                           | 16913                     | -        | -        | 25.55      | 38.65      |
| Saudi Arabia       | Asia      | -            | -          | -           | G4554     | Synthetic | -           | -                           | 27233                     | -        | -        | 25.55      | 42.45      |
| Saudi Arabia       | Asia      | -            | -          | -           | G4557     | Synthetic | -           | -                           | 53341                     | -        | -        | 25.45      | 38.65      |
| Saudi Arabia       | Asia      | -            | -          | -           | G4585     | Synthetic | -           | -                           | 16144                     | -        | -        | 24.35      | 40.15      |
| Saudi Arabia       | Asia      | -            | -          | -           | G4586     | Synthetic | -           | -                           | 18874                     | -        | -        | 24.25      | 40.15      |
| Saudi Arabia       | Asia      | -            | -          | -           | G4587     | Synthetic | -           | -                           | 12882                     | -        | -        | 24.25      | 47.35      |
| Saudi Arabia       | Asia      | -            | -          | -           | G4590     | Synthetic | -           | -                           | 15483                     | -        | -        | 24.15      | 47.35      |
| Saudi Arabia       | Asia      | -            | -          | -           | G4618     | Synthetic | -           | -                           | 20671                     | -        | -        | 23.25      | 46.05      |



| Country      | Continent | Station Name | River Name     | River Basin | GloFAS ID | Provider  | Provider ID | Catchment Area Provided km² | Catchment Area GloFAS km² | LAT Prov | LON Prov | LAT GloFAS | LON GloFAS |
|--------------|-----------|--------------|----------------|-------------|-----------|-----------|-------------|-----------------------------|---------------------------|----------|----------|------------|------------|
| Saudi Arabia | Asia      | -            | -              | -           | G4622     | Synthetic | -           | -                           | 35240                     | -        | -        | 23.15      | 46.05      |
| Saudi Arabia | Asia      | -            | -              | -           | G4623     | Synthetic | -           | -                           | 220547                    | -        | -        | 23.15      | 49.35      |
| Saudi Arabia | Asia      | -            | -              | -           | G4627     | Synthetic | -           | -                           | 19637                     | -        | -        | 22.85      | 45.55      |
| Saudi Arabia | Asia      | -            | -              | -           | G4628     | Synthetic | -           | -                           | 12404                     | -        | -        | 22.75      | 45.65      |
| Saudi Arabia | Asia      | -            | -              | -           | G4629     | Synthetic | -           | -                           | 26442                     | -        | -        | 22.75      | 52.05      |
| Saudi Arabia | Asia      | -            | -              | -           | G4631     | Synthetic | -           | -                           | 107794                    | -        | -        | 22.65      | 51.95      |
| Saudi Arabia | Asia      | -            | -              | -           | G4643     | Synthetic | -           | -                           | 24319                     | -        | -        | 22.05      | 48.75      |
| Saudi Arabia | Asia      | -            | -              | -           | G4644     | Synthetic | -           | -                           | 190606                    | -        | -        | 22.05      | 48.85      |
| Saudi Arabia | Asia      | -            | -              | -           | G4656     | Synthetic | -           | -                           | 28473                     | -        | -        | 21.75      | 48.25      |
| Saudi Arabia | Asia      | -            | -              | -           | G4660     | Synthetic | -           | -                           | 161325                    | -        | -        | 21.65      | 48.25      |
| Saudi Arabia | Asia      | -            | -              | -           | G4667     | Synthetic | -           | -                           | 14399                     | -        | -        | 21.45      | 43.35      |
| Saudi Arabia | Asia      | -            | -              | -           | G4676     | Synthetic | -           | -                           | 27958                     | -        | -        | 21.25      | 43.35      |
| Saudi Arabia | Asia      | -            | -              | -           | G4677     | Synthetic | -           | -                           | 188009                    | -        | -        | 21.25      | 52.95      |
| Saudi Arabia | Asia      | -            | -              | -           | G4678     | Synthetic | -           | -                           | 83375                     | -        | -        | 21.25      | 54.65      |
| Saudi Arabia | Asia      | -            | -              | -           | G4681     | Synthetic | -           | -                           | 50328                     | -        | -        | 21.15      | 50.95      |
| Saudi Arabia | Asia      | -            | -              | -           | G4684     | Synthetic | -           | -                           | 42449                     | -        | -        | 21.05      | 51.05      |
| Saudi Arabia | Asia      | -            | -              | -           | G4695     | Synthetic | -           | -                           | 58853                     | -        | -        | 20.65      | 44.25      |
| Saudi Arabia | Asia      | -            | -              | -           | G4696     | Synthetic | -           | -                           | 108440                    | -        | -        | 20.65      | 52.15      |
| Saudi Arabia | Asia      | -            | -              | -           | G4697     | Synthetic | -           | -                           | 26868                     | -        | -        | 20.55      | 44.25      |
| Saudi Arabia | Asia      | -            | -              | -           | G4698     | Synthetic | -           | -                           | 17840                     | -        | -        | 20.55      | 45.25      |
| Saudi Arabia | Asia      | -            | -              | -           | G4701     | Synthetic | -           | -                           | 93766                     | -        | -        | 20.45      | 45.25      |
| Saudi Arabia | Asia      | -            | -              | -           | G4702     | Synthetic | -           | -                           | 74106                     | -        | -        | 20.45      | 52.25      |
| Saudi Arabia | Asia      | -            | -              | -           | G4703     | Synthetic | -           | -                           | 116027                    | -        | -        | 20.35      | 45.75      |
| Saudi Arabia | Asia      | -            | -              | -           | G4704     | Synthetic | -           | -                           | 13469                     | -        | -        | 20.35      | 49.15      |
| Saudi Arabia | Asia      | -            | -              | -           | G4705     | Synthetic | -           | -                           | 17953                     | -        | -        | 20.35      | 51.45      |
| Saudi Arabia | Asia      | -            | -              | -           | G4707     | Synthetic | -           | -                           | 23586                     | -        | -        | 20.25      | 45.75      |
| Saudi Arabia | Asia      | -            | -              | -           | G4708     | Synthetic | -           | -                           | 24056                     | -        | -        | 20.25      | 49.15      |
| Saudi Arabia | Asia      | -            | -              | -           | G4709     | Synthetic | -           | -                           | 85357                     | -        | -        | 20.25      | 51.45      |
| Saudi Arabia | Asia      | -            | -              | -           | G4715     | Synthetic | -           | -                           | 51009                     | -        | -        | 19.85      | 51.75      |
| Saudi Arabia | Asia      | -            | -              | -           | G4719     | Synthetic | -           | -                           | 18187                     | -        | -        | 19.75      | 51.85      |
| Saudi Arabia | Asia      | -            | -              | -           | G4720     | Synthetic | -           | -                           | 35347                     | -        | -        | 19.75      | 53.45      |
| Saudi Arabia | Asia      | -            | -              | -           | G4735     | Synthetic | -           | -                           | 20294                     | -        | -        | 19.15      | 49.75      |
| Saudi Arabia | Asia      | -            | -              | -           | G4736     | Synthetic | -           | -                           | 45633                     | -        | -        | 19.15      | 50.35      |
| Saudi Arabia | Asia      | -            | -              | -           | G4741     | Synthetic | -           | -                           | 21580                     | -        | -        | 19.05      | 49.75      |
| Saudi Arabia | Asia      | -            | -              | -           | G4742     | Synthetic | -           | -                           | 35272                     | -        | -        | 19.05      | 50.45      |
| Saudi Arabia | Asia      | -            | -              | -           | G4790     | Synthetic | -           | -                           | 12887                     | -        | -        | 18.05      | 45.55      |
| Saudi Arabia | Asia      | -            | -              | -           | G4798     | Synthetic | -           | -                           | 13640                     | -        | -        | 17.85      | 45.55      |
| Syria        | Asia      | -            | Euphrates      | Tigris And  | G1922     | DFO       | 1970        | -                           | 225161                    | 34.694   | 40.815   | 34.65      | 40.85      |
| Syria        | Asia      | -            | Al Khabur Lake | Tigris And  | G1943     | DFO       | 2057        | -                           | 24862                     | 36.404   | 40.815   | 36.35      | 40.75      |

| Country    | Continent | Station Name        | River Name       | River Basin   | GloFAS ID | Provider  | Provider ID | Catchment Area Provided km² | Catchment Area GloFAS km² | LAT Prov | LON Prov | LAT GloFAS | LON GloFAS |
|------------|-----------|---------------------|------------------|---------------|-----------|-----------|-------------|-----------------------------|---------------------------|----------|----------|------------|------------|
| Syria      | Asia      | -                   | -                | -             | G4127     | Synthetic | -           | -                           | 10372                     | -        | -        | 36.55      | 40.65      |
| Syria      | Asia      | -                   | -                | -             | G4128     | Synthetic | -           | -                           | 13284                     | -        | -        | 36.55      | 40.75      |
| Syria      | Asia      | -                   | -                | -             | G4140     | Synthetic | -           | -                           | 14305                     | -        | -        | 36.05      | 39.05      |
| Syria      | Asia      | -                   | -                | -             | G4147     | Synthetic | -           | -                           | 123520                    | -        | -        | 35.95      | 38.95      |
| Syria      | Asia      | -                   | -                | -             | G4169     | Synthetic | -           | -                           | 147957                    | -        | -        | 35.15      | 40.35      |
| Syria      | Asia      | -                   | -                | -             | G4170     | Synthetic | -           | -                           | 36584                     | -        | -        | 35.15      | 40.45      |
| Syria      | Asia      | -                   | -                | -             | G4172     | Synthetic | -           | -                           | 184848                    | -        | -        | 35.05      | 40.45      |
| Syria      | Asia      | -                   | -                | -             | G4175     | Synthetic | -           | -                           | 17736                     | -        | -        | 34.95      | 40.45      |
| Syria      | Asia      | -                   | -                | -             | G4187     | Synthetic | -           | -                           | 14458                     | -        | -        | 34.65      | 40.55      |
| Tajikistan | Asia      | Garm                | Vakhsh           | Aral Drainage | G0746     | GRDC      | 2917920     | 20000                       | 20033                     | 39       | 70.33    | 38.95      | 70.25      |
| Tajikistan | Asia      | -                   | -                | -             | G4077     | Synthetic | -           | -                           | 28322                     | -        | -        | 38.05      | 71.55      |
| Tajikistan | Asia      | -                   | -                | -             | G4093     | Synthetic | -           | -                           | 13961                     | -        | -        | 37.45      | 71.55      |
| Tajikistan | Asia      | -                   | -                | -             | G4104     | Synthetic | -           | -                           | 10563                     | -        | -        | 37.15      | 68.15      |
| Tajikistan | Asia      | -                   | -                | -             | G4105     | Synthetic | -           | -                           | 39511                     | -        | -        | 37.15      | 68.25      |
| Tajikistan | Asia      | -                   | -                | -             | G4110     | Synthetic | -           | -                           | 194489                    | -        | -        | 37.05      | 68.15      |
| Tajikistan | Asia      | -                   | -                | -             | G4111     | Synthetic | -           | -                           | 157062                    | -        | -        | 37.05      | 68.25      |
| Thailand   | Asia      | Chiang Saen         | Mekong           | Mekong        | G0938     | GRDC      | 2969010     | 189000                      | 189232                    | 20.273   | 100.08   | 20.75      | 100.25     |
| Thailand   | Asia      | Sop Kok             | Mekong           | Mekong        | G0939     | GRDC      | 2969012     | 201000                      | 204983                    | 20.241   | 100.13   | 20.25      | 100.15     |
| Thailand   | Asia      | Chiang Khan         | Mekong           | Mekong        | G0953     | GRDC      | 2969430     | 292000                      | 289272                    | 17.896   | 101.66   | 17.85      | 101.45     |
| Thailand   | Asia      | Nong Khai           | Mekong           | Mekong        | G0954     | GRDC      | 2969090     | 302000                      | 301469                    | 17.876   | 102.72   | 18.15      | 102.05     |
| Thailand   | Asia      | Ban Pho Tak         | Huai Thon        | Mekong        | G0955     | GRDC      | 2969450     | -                           | 2368                      | 17.829   | 102.41   | 17.85      | 102.45     |
| Thailand   | Asia      | Nakhon Phanom       | Mekong           | Mekong        | G0958     | GRDC      | 2969095     | 373000                      | 373535                    | 17.398   | 104.80   | 17.65      | 104.45     |
| Thailand   | Asia      | Mukdahan            | Mekong           | Mekong        | G0962     | GRDC      | 2969100     | 391000                      | 392038                    | 16.54    | 104.73   | 16.85      | 104.75     |
| Thailand   | Asia      | Ban Kok             | Lam Chi          | Mekong        | G0964     | GRDC      | 2969083     | 28500                       | 29793                     | 16.35    | 102.96   | 16.35      | 102.95     |
| Thailand   | Asia      | Ban Chot            | Lam Chi          | Mekong        | G0969     | GRDC      | 2969082     | 10200                       | 10514                     | 16.1     | 102.57   | 15.95      | 102.35     |
| Thailand   | Asia      | Yasothon            | Lam Chi          | Mekong        | G0971     | GRDC      | 2969150     | 43100                       | 42887                     | 15.781   | 104.14   | 15.95      | 103.95     |
| Thailand   | Asia      | Khai Chira Prawat   | Chao Phraya      | Chao Phraya   | G0974     | GRDC      | 2964122     | 110569                      | 111337                    | 15.670   | 100.67   | 15.65      | 100.05     |
| Thailand   | Asia      | Nakhon Sawan        | Chao Phraya      | Chao Phraya   | G0975     | GRDC      | 2964100     | 110569                      | 111337                    | 15.67    | 100.12   | 15.65      | 100.05     |
| Thailand   | Asia      | Ban Bung Bao        | Nam Mun          | Mekong        | G0978     | GRDC      | 2969232     | 23200                       | 21852                     | 15.433   | 103.01   | 15.35      | 102.95     |
| Thailand   | Asia      | Rasi Salai          | Nam Mun          | Mekong        | G0980     | GRDC      | 2969124     | 44600                       | 45096                     | 15.335   | 104.16   | 15.35      | 104.05     |
| Thailand   | Asia      | Khong Chiam Ban Dan | Mekong           | Mekong        | G0981     | GRDC      | 2969101     | 419000                      | 420028                    | 15.318   | 105.5    | 16.05      | 105.35     |
| Thailand   | Asia      | Satuk               | Nam Mun          | Mekong        | G0982     | GRDC      | 2969087     | 26800                       | 27115                     | 15.303   | 103.29   | 15.45      | 103.05     |
| Thailand   | Asia      | Kaeng Saphu Tai     | Nam Mun          | Mekong        | G0983     | GRDC      | 2969220     | 116000                      | 116961                    | 15.24    | 105.24   | 15.35      | 105.15     |
| Thailand   | Asia      | Ubon                | Nam Mun          | Mekong        | G0984     | GRDC      | 2969200     | 104000                      | 103908                    | 15.221   | 104.86   | 15.15      | 104.75     |
| Thailand   | Asia      | Wat Pho Ngam Ban Re | Chao Phraya      | Chao Phraya   | G0985     | GRDC      | 2964130     | 120693                      | 119114                    | 15.165   | 100.19   | 15.15      | 100.15     |
| Thailand   | Asia      | Ban It              | Khlong Bang Kaeo | Chao Phraya   | G0992     | GRDC      | 2964147     | -                           | 2519                      | 14.592   | 100.47   | 14.55      | 100.55     |
| Thailand   | Asia      | Ban Bang Kaeo 1     | Chao Phraya      | Chao Phraya   | G0993     | GRDC      | 2964120     | -                           | 121992                    | 14.584   | 100.45   | 14.55      | 100.45     |
| Thailand   | Asia      | -                   | Mekong           | Mekong        | G1730     | DFO       | 84          | -                           | 388118                    | 16.964   | 104.71   | 16.95      | 104.75     |
| Thailand   | Asia      | Pho Thale Y5        | Yom              | Yom River     | G1780     | RID       | 5           | 22344                       | 20921                     | 16.093   | 100.26   | 16.55      | 100.15     |

| Country  | Continent | Station Name        | River Name    | River Basin | GloFAS ID | Provider  | Provider ID | Catchment Area Provided km² | Catchment Area GloFAS km² | LAT Prov | LON Prov | LAT GloFAS | LON GloFAS |
|----------|-----------|---------------------|---------------|-------------|-----------|-----------|-------------|-----------------------------|---------------------------|----------|----------|------------|------------|
| Thailand | Asia      | Khanu P16           | Ping          | Ping River  | G1781     | RID       | 16          | 45677                       | 45592                     | 16.061   | 99.864   | 15.95      | 99.85      |
| Thailand | Asia      | Muang N5A           | Nan           | Nan River   | G4597     | RID       | 5           | 25286                       | 25858                     | 16.820   | 100.26   | 16.85      | 100.25     |
| Thailand | Asia      | Wang Kra Chao P12   | Ping          | Ping River  | G4679     | RID       | 12          | 26396                       | 25690                     | 17.241   | 99.012   | 17.25      | 98.95      |
| Thailand | Asia      | Ban Hat Phai N12A   | Nan           | Nan River   | G4682     | RID       | 12          | 15718                       | 15660                     | 17.736   | 100.54   | 17.75      | 100.55     |
| Thailand | Asia      | Ban Wang Man W4A    | Wang          | Wang River  | G4712     | RID       | 4           | 10507                       | 10614                     | 17.206   | 99.102   | 17.25      | 99.05      |
| Thailand | Asia      | -                   | -             | -           | G4776     | Synthetic | -           | -                           | 343178                    | -        | -        | 18.25      | 103.85     |
| Thailand | Asia      | Ban Huai Yang P7A   | Ping          | Ping River  | G4797     | RID       | 7           | 42700                       | 42610                     | 16.477   | 99.518   | 16.45      | 99.55      |
| Thailand | Asia      | -                   | -             | -           | G4864     | Synthetic | -           | -                           | 399423                    | -        | -        | 16.05      | 105.15     |
| Thailand | Asia      | Phetchabun S4B      | Pasak         | Pasak River | G4873     | RID       | 4           | 3566                        | 3568                      | 16.42    | 101.17   | 16.45      | 101.15     |
| Thailand | Asia      | Ban Don Rabiang Y14 | Yom           | Yom River   | G4896     | RID       | 14          | 12131                       | 12374                     | 17.595   | 99.718   | 17.65      | 99.65      |
| Thailand | Asia      | Ban Chong Nua S9    | Pasak         | Pasak River | G4897     | RID       | 9           | 14374                       | 14464                     | 14.625   | 101.01   | 14.55      | 100.95     |
| Thailand | Asia      | Ban - Som S14       | Lam Sonthi    | Pasak River | G4910     | RID       | 14          | 1247                        | 1318                      | 15.223   | 101.28   | 15.25      | 101.35     |
| Turkey   | Asia      | Karsikoey           | Coruhsuyu     | -           | G0684     | GRDC      | 6688900     | 19654                       | 19947                     | 41.455   | 41.714   | 41.35      | 41.65      |
| Turkey   | Asia      | Inoezuekosaca       | Kizilirmak    | Kizilirmak  | G0689     | GRDC      | 6688600     | 75121                       | 76417                     | 41.366   | 35.833   | 41.35      | 35.75      |
| Turkey   | Asia      | Carsamba            | Yesilirmak    | -           | G0697     | GRDC      | 6688650     | 35958                       | 36648                     | 41.198   | 36.721   | 40.95      | 36.65      |
| Turkey   | Asia      | Botbasi             | Sakarya Nehri | Sakarya     | G0704     | GRDC      | 6688150     | 55322                       | 55162                     | 40.97    | 30.52    | 40.25      | 30.05      |
| Turkey   | Asia      | Dereciköeren        | Filyos Cayi   | Sakarya     | G0719     | GRDC      | 6688300     | 13300                       | 59270                     | 40.3     | 30.2     | 40.45      | 30.15      |
| Turkey   | Asia      | Akcasusurluk        | Kocasu        | -           | G0720     | GRDC      | 6667100     | 21611                       | 24356                     | 40.299   | 28.438   | 40.35      | 28.45      |
| Turkey   | Asia      | Bagistas            | Euphrates     | Tigris And  | G0738     | GRDC      | 6695250     | 15562                       | 15870                     | 39.45    | 38.483   | 39.45      | 38.55      |
| Turkey   | Asia      | Palu                | Murat Nehri   | Tigris And  | G0762     | GRDC      | 6695400     | 25447                       | 25572                     | 38.691   | 39.928   | 38.75      | 40.05      |
| Turkey   | Asia      | Manisa              | Gediz         | -           | G0765     | GRDC      | 6667300     | 15616                       | 15712                     | 38.619   | 27.430   | 38.65      | 27.35      |
| Turkey   | Asia      | Yakapinar Misis     | Ceyhan Nehri  | -           | G0792     | GRDC      | 6691650     | 20466                       | 20653                     | 36.95    | 35.6     | 36.95      | 35.65      |
| Turkey   | Asia      | Karahacili          | Goeksu Nehri  | -           | G0803     | GRDC      | 6691550     | 10044                       | 10000                     | 36.416   | 33.833   | 36.45      | 33.55      |
| Turkey   | Asia      | Demirköeprue        | Asi Nehri     | -           | G0808     | GRDC      | 6692100     | 16170                       | 16184                     | 36.283   | 36.3     | 35.85      | 36.35      |
| Turkey   | Asia      | -                   | -             | -           | G3916     | Synthetic | -           | -                           | 39908                     | -        | -        | 41.15      | 26.35      |
| Turkey   | Asia      | -                   | -             | -           | G3920     | Synthetic | -           | -                           | 11368                     | -        | -        | 41.05      | 26.45      |
| Turkey   | Asia      | -                   | -             | -           | G3941     | Synthetic | -           | -                           | 21376                     | -        | -        | 40.75      | 36.35      |
| Turkey   | Asia      | -                   | -             | -           | G3942     | Synthetic | -           | -                           | 13376                     | -        | -        | 40.75      | 36.55      |
| Turkey   | Asia      | -                   | -             | -           | G3954     | Synthetic | -           | -                           | 38593                     | -        | -        | 40.45      | 34.05      |
| Turkey   | Asia      | -                   | -             | -           | G3964     | Synthetic | -           | -                           | 17440                     | -        | -        | 40.35      | 34.15      |
| Turkey   | Asia      | -                   | -             | -           | G3977     | Synthetic | -           | -                           | 9589                      | -        | -        | 40.25      | 43.65      |
| Turkey   | Asia      | -                   | -             | -           | G3985     | Synthetic | -           | -                           | 10164                     | -        | -        | 40.15      | 43.55      |
| Turkey   | Asia      | -                   | -             | -           | G3995     | Synthetic | -           | -                           | 11193                     | -        | -        | 39.65      | 31.85      |
| Turkey   | Asia      | -                   | -             | -           | G4002     | Synthetic | -           | -                           | 21674                     | -        | -        | 39.55      | 31.95      |
| Turkey   | Asia      | -                   | -             | -           | G4041     | Synthetic | -           | -                           | 22840                     | -        | -        | 38.95      | 38.75      |
| Turkey   | Asia      | -                   | -             | -           | G4045     | Synthetic | -           | -                           | 39744                     | -        | -        | 38.85      | 38.85      |
| Turkey   | Asia      | -                   | -             | -           | G4046     | Synthetic | -           | -                           | 9979                      | -        | -        | 38.85      | 39.55      |
| Turkey   | Asia      | -                   | -             | -           | G4063     | Synthetic | -           | -                           | 67648                     | -        | -        | 38.55      | 38.35      |
| Turkey   | Asia      | -                   | -             | -           | G4084     | Synthetic | -           | -                           | 11615                     | -        | -        | 37.85      | 41.85      |

| Country      | Continent | Station Name | River Name | River Basin   | GloFAS ID | Provider  | Provider ID | Catchment Area Provided km² | Catchment Area GloFAS km² | LAT Prov | LON Prov | LAT GloFAS | LON GloFAS |
|--------------|-----------|--------------|------------|---------------|-----------|-----------|-------------|-----------------------------|---------------------------|----------|----------|------------|------------|
| Turkmenistan | Asia      | Kerki        | Amu Darya  | Aral Drainage | G0778     | GRDC      | 2917110     | 309000                      | 300880                    | 37.83    | 65.25    | 38.65      | 64.05      |
| Turkmenistan | Asia      | -            | -          | -             | G4003     | Synthetic | -           | -                           | 10338                     | -        | -        | 39.55      | 55.75      |
| Turkmenistan | Asia      | -            | -          | -             | G4010     | Synthetic | -           | -                           | 273423                    | -        | -        | 39.45      | 55.75      |
| Turkmenistan | Asia      | -            | -          | -             | G4017     | Synthetic | -           | -                           | 411174                    | -        | -        | 39.35      | 63.05      |
| Turkmenistan | Asia      | -            | -          | -             | G4022     | Synthetic | -           | -                           | 13074                     | -        | -        | 39.25      | 63.05      |
| Turkmenistan | Asia      | -            | -          | -             | G4029     | Synthetic | -           | -                           | 69370                     | -        | -        | 39.15      | 63.65      |
| Turkmenistan | Asia      | -            | -          | -             | G4035     | Synthetic | -           | -                           | 340835                    | -        | -        | 39.05      | 63.75      |
| Turkmenistan | Asia      | -            | -          | -             | G4050     | Synthetic | -           | -                           | 235855                    | -        | -        | 38.75      | 58.45      |
| Turkmenistan | Asia      | -            | -          | -             | G4051     | Synthetic | -           | -                           | 215678                    | -        | -        | 38.75      | 58.85      |
| Turkmenistan | Asia      | -            | -          | -             | G4052     | Synthetic | -           | -                           | 33384                     | -        | -        | 38.75      | 61.05      |
| Turkmenistan | Asia      | -            | -          | -             | G4053     | Synthetic | -           | -                           | 21376                     | -        | -        | 38.75      | 61.55      |
| Turkmenistan | Asia      | -            | -          | -             | G4057     | Synthetic | -           | -                           | 11933                     | -        | -        | 38.65      | 58.45      |
| Turkmenistan | Asia      | -            | -          | -             | G4058     | Synthetic | -           | -                           | 17355                     | -        | -        | 38.65      | 58.85      |
| Turkmenistan | Asia      | -            | -          | -             | G4059     | Synthetic | -           | -                           | 122237                    | -        | -        | 38.65      | 59.85      |
| Turkmenistan | Asia      | -            | -          | -             | G4060     | Synthetic | -           | -                           | 96735                     | -        | -        | 38.65      | 60.75      |
| Turkmenistan | Asia      | -            | -          | -             | G4061     | Synthetic | -           | -                           | 60810                     | -        | -        | 38.65      | 61.05      |
| Turkmenistan | Asia      | -            | -          | -             | G4062     | Synthetic | -           | -                           | 10737                     | -        | -        | 38.65      | 61.55      |
| Turkmenistan | Asia      | -            | -          | -             | G4064     | Synthetic | -           | -                           | 86217                     | -        | -        | 38.55      | 59.85      |
| Turkmenistan | Asia      | -            | -          | -             | G4065     | Synthetic | -           | -                           | 20805                     | -        | -        | 38.55      | 60.65      |
| Turkmenistan | Asia      | -            | -          | -             | G4089     | Synthetic | -           | -                           | 254788                    | -        | -        | 37.55      | 65.75      |
| Turkmenistan | Asia      | -            | -          | -             | G4091     | Synthetic | -           | -                           | 24879                     | -        | -        | 37.45      | 65.65      |
| Turkmenistan | Asia      | -            | -          | -             | G4098     | Synthetic | -           | -                           | 17241                     | -        | -        | 37.25      | 65.15      |
| Turkmenistan | Asia      | -            | -          | -             | G4099     | Synthetic | -           | -                           | 14314                     | -        | -        | 37.25      | 65.25      |
| Turkmenistan | Asia      | -            | -          | -             | G4149     | Synthetic | -           | -                           | 11114                     | -        | -        | 35.95      | 62.75      |
| Turkmenistan | Asia      | -            | -          | -             | G4150     | Synthetic | -           | -                           | 36173                     | -        | -        | 35.95      | 62.85      |
| Uzbekistan   | Asia      | -            | -          | -             | G3917     | Synthetic | -           | -                           | 31974                     | -        | -        | 41.15      | 67.95      |
| Uzbekistan   | Asia      | -            | -          | -             | G3930     | Synthetic | -           | -                           | 13455                     | -        | -        | 40.95      | 68.85      |
| Uzbekistan   | Asia      | -            | -          | -             | G3937     | Synthetic | -           | -                           | 29166                     | -        | -        | 40.85      | 71.95      |
| Uzbekistan   | Asia      | -            | -          | -             | G3943     | Synthetic | -           | -                           | 144940                    | -        | -        | 40.75      | 68.85      |
| Uzbekistan   | Asia      | -            | -          | -             | G3944     | Synthetic | -           | -                           | 12412                     | -        | -        | 40.75      | 71.05      |
| Uzbekistan   | Asia      | -            | -          | -             | G3991     | Synthetic | -           | -                           | 30793                     | -        | -        | 39.75      | 64.15      |
| Uzbekistan   | Asia      | -            | -          | -             | G3996     | Synthetic | -           | -                           | 29452                     | -        | -        | 39.65      | 64.15      |
| Uzbekistan   | Asia      | -            | -          | -             | G3997     | Synthetic | -           | -                           | 13409                     | -        | -        | 39.65      | 64.55      |
| Uzbekistan   | Asia      | -            | -          | -             | G4004     | Synthetic | -           | -                           | 15079                     | -        | -        | 39.55      | 64.55      |
| Uzbekistan   | Asia      | -            | -          | -             | G4095     | Synthetic | -           | -                           | 13628                     | -        | -        | 37.35      | 67.35      |
| Uzbekistan   | Asia      | -            | -          | -             | G4101     | Synthetic | -           | -                           | 212330                    | -        | -        | 37.25      | 67.35      |
| Vietnam      | Asia      | Qui Chau     | Hieu       | Ca            | G0941     | GRDC      | 2372200     | -                           | 2224                      | 19.55    | 105.1    | 19.55      | 105.15     |
| Vietnam      | Asia      | Yen Thuong   | Ca         | Ca            | G0943     | GRDC      | 2372102     | -                           | 22258                     | 18.883   | 105.28   | 18.85      | 105.25     |
| Vietnam      | Asia      | Kien Giang   | Kien Giang | -             | G0956     | GRDC      | 2371500     | -                           | 1898                      | 17.466   | 106.63   | 17.45      | 106.65     |

| Country | Continent | Station Name | River Name      | River Basin     | GloFAS ID | Provider  | Provider ID | Catchment Area Provided km <sup>2</sup> | Catchment Area GloFAS km <sup>2</sup> | LAT Prov | LON Prov | LAT GloFAS | LON GloFAS |
|---------|-----------|--------------|-----------------|-----------------|-----------|-----------|-------------|-----------------------------------------|---------------------------------------|----------|----------|------------|------------|
| Vietnam | Asia      | Nong Son     | Tranh - Thu Bon | Tranh - Thu Bon | G0972     | GRDC      | 2371300     | -                                       | 3472                                  | 15.716   | 108.01   | 15.75      | 108.05     |
| Vietnam | Asia      | An Chi       | Ve              | -               | G0987     | GRDC      | 2371150     | -                                       | 3239                                  | 14.983   | 108.83   | 15.15      | 108.85     |
| Vietnam | Asia      | An Hoa       | An Lao          | -               | G0997     | GRDC      | 2371100     | -                                       | 1443                                  | 14.366   | 108.98   | 14.45      | 108.95     |
| Vietnam | Asia      | Song Hinh    | Da Rang         | -               | G1021     | GRDC      | 2370300     | -                                       | 12195                                 | 12.916   | 108.91   | 13.05      | 108.95     |
| Vietnam | Asia      | Ban Don      | Srepok          | Mekong          | G1025     | GRDC      | 2369905     | 10600                                   | 11031                                 | 12.85    | 107.78   | 12.85      | 107.85     |
| Vietnam | Asia      | Giang Son    | Ea Krong        | Mekong          | G1030     | GRDC      | 2369902     | -                                       | 3756                                  | 12.516   | 108.18   | 12.45      | 108.15     |
| Vietnam | Asia      | Duc Xuyen    | Srepok          | Mekong          | G1033     | GRDC      | 2369904     | -                                       | 4247                                  | 12.35    | 107.93   | 12.35      | 107.95     |
| Vietnam | Asia      | Song Luy     | Luy             | -               | G1052     | GRDC      | 2370100     | -                                       | 1095                                  | 11.216   | 108.31   | 11.15      | 108.35     |
| Vietnam | Asia      | -            | -               | -               | G4646     | Synthetic | -           | -                                       | 11670                                 | -        | -        | 22.05      | 105.05     |
| Vietnam | Asia      | -            | -               | -               | G4647     | Synthetic | -           | -                                       | 14999                                 | -        | -        | 22.05      | 105.25     |
| Vietnam | Asia      | -            | -               | -               | G4680     | Synthetic | -           | -                                       | 99413                                 | -        | -        | 21.25      | 105.35     |
| Vietnam | Asia      | -            | -               | -               | G4963     | Synthetic | -           | -                                       | 766149                                | -        | -        | 10.65      | 105.35     |
| Vietnam | Asia      | -            | -               | -               | G4966     | Synthetic | -           | -                                       | 12417                                 | -        | -        | 10.55      | 105.25     |
| Yemen   | Asia      | -            | -               | -               | G4770     | Synthetic | -           | -                                       | 13184                                 | -        | -        | 18.35      | 49.95      |
| Yemen   | Asia      | -            | -               | -               | G4775     | Synthetic | -           | -                                       | 17075                                 | -        | -        | 18.25      | 49.95      |

Table 3: GloFAS diagnostic points for Australia-Oceania.

| Country   | Continent  | Station Name         | River Name  | River Basin      | GloFAS ID | Provider | Provider ID | Catchment Area Provided km <sup>2</sup> | Catchment Area GloFAS km <sup>2</sup> | LAT Prov | LON Prov | LAT GloFAS | LON GloFAS |
|-----------|------------|----------------------|-------------|------------------|-----------|----------|-------------|-----------------------------------------|---------------------------------------|----------|----------|------------|------------|
| Australia | Australia- | Mount Nancar         | Daly        | Daly             | G1325     | GRDC     | 5708145     | 47100                                   | 46243                                 | -        | 130.73   | -13.95     | 130.85     |
| Australia | Australia- | Red Rock             | Roper       | Roper            | G1333     | BOM      | 9030250     | 43476                                   | 43219                                 | -        | 134.41   | -14.65     | 134.45     |
| Australia | Australia- | Kalpowa Crossing     | Normanby    | -                | G1337     | GRDC     | 5101071     | 12930                                   | 12983                                 | -        | 144.21   | -14.85     | 144.15     |
| Australia | Australia- | Coolibah Homestead   | Victoria    | Victoria         | G1347     | GRDC     | 5708110     | 44900                                   | 44297                                 | -        | 130.96   | -16.85     | 131.25     |
| Australia | Australia- | Tarrara Bar          | Ord         | Ord              | G1349     | GRDC     | 5608096     | 51028                                   | 51268                                 | -15.56   | 128.69   | -15.55     | 128.35     |
| Australia | Australia- | Victoria Highway     | West Baines | Victoria         | G1356     | GRDC     | 5708126     | 10204                                   | 10100                                 | -        | 129.73   | -15.95     | 129.75     |
| Australia | Australia- | Koolatah             | Mitchell    | Mitchell         | G1358     | GRDC     | 5109200     | 45872                                   | 45866                                 | -        | 142.37   | -15.75     | 142.15     |
| Australia | Australia- | Borrooloola Crossing | Macarthur   | Macarthur        | G1360     | GRDC     | 5709112     | 15700                                   | 14940                                 | -16.08   | 136.31   | -15.95     | 136.45     |
| Australia | Australia- | M I M Pump           | Macarthur   | Macarthur        | G1365     | GRDC     | 5709110     | 10400                                   | 10184                                 | -        | 136.08   | -16.45     | 136.05     |
| Australia | Australia- | Old Ord Homestead    | Ord         | Ord              | G1371     | GRDC     | 5608095     | 19513                                   | 19645                                 | -        | 128.85   | -17.25     | 128.85     |
| Australia | Australia- | Diamond Gorge        | Fitzroy     | Fitzroy (Western | G1377     | GRDC     | 5608023     | 17152                                   | 17221                                 | -        | 126.02   | -17.75     | 125.95     |
| Australia | Australia- | Willare              | Fitzroy     | Fitzroy (Western | G1379     | GRDC     | 5608025     | 91902                                   | 92204                                 | -17.75   | 123.5    | -17.85     | 123.65     |
| Australia | Australia- | Glenore Weir         | Norman      | Flinders         | G1380     | GRDC     | 5109161     | 39360                                   | 38249                                 | -        | 141.13   | -17.85     | 141.15     |
| Australia | Australia- | Walkers Bend         | Flinders    | Flinders         | G1383     | GRDC     | 5109151     | 106300                                  | 105640                                | -        | 140.85   | -17.65     | 140.75     |
| Australia | Australia- | Rockfields           | Gilbert     | Gilbert          | G1384     | GRDC     | 5109170     | 10987                                   | 10816                                 | -        | 142.87   | -18.25     | 142.95     |
| Australia | Australia- | Fitzroy Crossing     | Fitzroy     | Fitzroy (Western | G1385     | GRDC     | 5608024     | 46133                                   | 46440                                 | -        | 125.57   | -18.45     | 125.25     |
| Australia | Australia- | Floraville Homestead | Leichhardt  | Leichhardt       | G1386     | GRDC     | 5109210     | 23660                                   | 23412                                 | -        | 139.88   | -18.15     | 139.85     |
| Australia | Australia- | Gregory Downs        | Gregory     | -                | G1390     | GRDC     | 5109110     | 12690                                   | 12592                                 | -        | 139.25   | -18.85     | 139.05     |

| Country   | Continent  | Station Name              | River Name           | River Basin | GloFAS ID | Provider | Provider ID | Catchment Area Provided km² | Catchment Area GloFAS km² | LAT Prov | LON Prov | LAT GloFAS | LON GloFAS |
|-----------|------------|---------------------------|----------------------|-------------|-----------|----------|-------------|-----------------------------|---------------------------|----------|----------|------------|------------|
| Australia | Australia- | Home Hill                 | Burdekin             | Burdekin    | G1396     | GRDC     | 5101201     | 129939                      | 125304                    | -        | 147.39   | -19.65     | 147.45     |
| Australia | Australia- | Clare                     | Burdekin             | Burdekin    | G1397     | GRDC     | 5101200     | 129900                      | 125304                    | -        | 147.24   | -19.65     | 147.45     |
| Australia | Australia- | Coolenar Pool             | De Grey              | De Grey     | G1402     | GRDC     | 5607500     | 50007                       | 51283                     | -        | 119.24   | -20.35     | 119.25     |
| Australia | Australia- | Jimbegnyinoo Pool         | Fortescue            | Fortescue   | G1407     | GRDC     | 5607450     | 18371                       | 18340                     | -        | 116.15   | -22.45     | 119.65     |
| Australia | Australia- | Nanutarra                 | Ashburton            | Ashburton   | G1419     | GRDC     | 5607400     | 71387                       | 70749                     | -        | 115.49   | -22.55     | 115.35     |
| Australia | Australia- | The Gap                   | Fitzroy (Queensland) | Fitzroy     | G1421     | GRDC     | 5101301     | 135757                      | 134951                    | -        | 150.10   | -23.55     | 150.65     |
| Australia | Australia- | Nune Mile Bridge          | Gascoyne             | -           | G1432     | GRDC     | 5607200     | 73432                       | 71792                     | -        | 113.76   | -24.85     | 113.65     |
| Australia | Australia- | Walla                     | Burnett              | -           | G1435     | GRDC     | 5101470     | 32455                       | 31430                     | -        | 151.98   | -24.85     | 152.35     |
| Australia | Australia- | Savages Crossing          | Brisbane             | -           | G1448     | GRDC     | 5101500     | 10170                       | 9959                      | -27.44   | 152.66   | -27.55     | 152.75     |
| Australia | Australia- | Cullyamurra Water Hole    | Cooper Creek         | Eyre Lake   | G1451     | BOM      | 30501       | 230000                      | 229972                    | -        | 140.84   | -28.45     | 138.95     |
| Australia | Australia- | Emu Springs               | Murchison            | Murchison   | G1452     | GRDC     | 5607100     | 86777                       | 61922                     | -        | 114.54   | -27.65     | 114.15     |
| Australia | Australia- | Caiwarro                  | Paroo River          | Murray      | G1456     | BOM      | 424002      | 21446                       | 23109                     | -        | 144.78   | -29.25     | 144.45     |
| Australia | Australia- | Brenda                    | Culgoa               | Murray      | G1458     | GRDC     | 5204460     | -                           | 78826                     | -        | 147.30   | -29.05     | 147.35     |
| Australia | Australia- | Mogil Mogil               | Barwon               | Murray      | G1462     | GRDC     | 5204452     | 64800                       | 61181                     | -        | 148.68   | -29.35     | 148.65     |
| Australia | Australia- | Yarraman Bridge           | Gwydir               | Murray      | G1463     | GRDC     | 5204181     | 12960                       | 12936                     | -        | 149.84   | -29.25     | 149.25     |
| Australia | Australia- | Lilydale Newbold Crossing | Clarence             | -           | G1464     | GRDC     | 5202044     | 16690                       | 16342                     | -        | 152.68   | -29.55     | 152.75     |
| Australia | Australia- | Brewarrina                | Barwon               | Murray      | G1467     | GRDC     | 5204450     | 297850                      | 196926                    | -        | 146.86   | -29.95     | 146.45     |
| Australia | Australia- | Dangar Bridge Walgett     | Barwon               | Murray      | G1468     | GRDC     | 5204451     | 132200                      | 125565                    | -        | 148.06   | -30.05     | 147.65     |
| Australia | Australia- | Bourke Town               | Darling              | Murray      | G1470     | GRDC     | 5204255     | 386000                      | 381294                    | -        | 145.93   | -30.35     | 145.55     |
| Australia | Australia- | Louth                     | Darling              | Murray      | G1474     | GRDC     | 5204250     | 489300                      | 435628                    | -        | 145.11   | -30.55     | 145.05     |
| Australia | Australia- | Menindee U S Weir 32      | Darling              | Murray      | G1482     | GRDC     | 5204252     | 575000                      | 459468                    | -        | 142.37   | -32.65     | 142.35     |
| Australia | Australia- | Singleton                 | Hunter               | -           | G1484     | GRDC     | 5202103     | 16400                       | 16237                     | -        | 151.17   | -32.65     | 151.45     |
| Australia | Australia- | D S Burrendong Dam        | Macquairie           | Murray      | G1485     | GRDC     | 5204401     | 13980                       | 14046                     | -        | 149.08   | -32.65     | 148.95     |
| Australia | Australia- | Greta                     | Hunter               | -           | G1486     | GRDC     | 5202102     | 17320                       | 17570                     | -        | 151.40   | -32.75     | 151.55     |
| Australia | Australia- | Wycot                     | Great Darling        | Murray      | G1487     | GRDC     | 5204253     | -                           | 6029                      | -        | 142.05   | -32.95     | 142.05     |
| Australia | Australia- | Forbes Cottons Weir       | Lachlan              | Murray      | G1492     | GRDC     | 5204301     | 19000                       | 19628                     | -        | 147.99   | -33.45     | 147.75     |
| Australia | Australia- | Burtundy                  | Darling              | Murray      | G1494     | GRDC     | 5204251     | 647200                      | 463121                    | -        | 142.26   | -34.05     | 141.85     |
| Australia | Australia- | Penrith                   | Nepean               | -           | G1495     | GRDC     | 5202135     | 11000                       | 10964                     | -        | 150.68   | -33.65     | 150.65     |
| Australia | Australia- | Booligal                  | Lachlan              | Murray      | G1497     | GRDC     | 5204300     | 55900                       | 55898                     | -        | 144.88   | -34.05     | 144.65     |
| Australia | Australia- | Darradup                  | Blackwood            | Blackwood   | G1498     | GRDC     | 5606100     | 11593                       | 12730                     | -        | 115.61   | -33.55     | 116.85     |
| Australia | Australia- | Overland Corner 417 5     | Murray               | Murray      | G1499     | GRDC     | 5404270     | 1000001                     | 704854                    | -        | 140.27   | -34.15     | 140.25     |
| Australia | Australia- | Lock 1 Downstream         | Murray               | Murray      | G1500     | GRDC     | 5404271     | -                           | 713793                    | -        | 139.61   | -34.35     | 139.65     |
| Australia | Australia- | D S Maude Weir            | Murrumbidgee         | Murray      | G1502     | GRDC     | 5204101     | 57700                       | 35746                     | -        | 144.30   | -34.35     | 144.05     |
| Australia | Australia- | D S Balranald Weir        | Murrumbidgee         | Murray      | G1503     | GRDC     | 5204106     | 166000                      | 121611                    | -        | 143.49   | -34.65     | 143.25     |
| Australia | Australia- | Narrandera                | Murrumbidgee         | Murray      | G1504     | GRDC     | 5204102     | 34200                       | 34188                     | -        | 146.54   | -34.55     | 144.75     |
| Australia | Australia- | Below Wakool Junction     | Murray               | Murray      | G1506     | GRDC     | 5304140     | -                           | 100516                    | -        | 143.34   | -34.85     | 143.35     |
| Australia | Australia- | D S Burrinjuck Dam        | Murrumbidgee         | Murray      | G1507     | GRDC     | 5204104     | 13100                       | 14003                     | -        | 148.57   | -34.85     | 148.35     |
| Australia | Australia- | Gundagai                  | Murrumbidgee         | Murray      | G1508     | GRDC     | 5204103     | 21100                       | 21218                     | -        | 148.10   | -35.05     | 147.75     |
| Australia | Australia- | Jarrahmond                | Snowy                | -           | G1510     | GRDC     | 5302229     | 13421                       | 12446                     | -        | 148.36   | -37.75     | 148.45     |

| Country   | Continent  | Station Name      | River Name      | River Basin      | GloFAS ID | Provider  | Provider ID | Catchment Area Provided km² | Catchment Area GloFAS km² | LAT Prov | LON Prov | LAT GloFAS | LON GloFAS |
|-----------|------------|-------------------|-----------------|------------------|-----------|-----------|-------------|-----------------------------|---------------------------|----------|----------|------------|------------|
| Australia | Australia- | Dartmoor          | Glenelg         | -                | G1511     | GRDC      | 5302400     | 11914                       | 11890                     | -        | 141.28   | -38.05     | 140.95     |
| Australia | Australia- | -                 | Fitzroy         | Fitzroy (Western | G1708     | DFO       | 15          | -                           | 45639                     | -        | 125.41   | -18.35     | 125.45     |
| Australia | Australia- | -                 | Flinders        | Flinders         | G1736     | DFO       | 99          | -                           | 40182                     | -        | 140.80   | -19.35     | 140.75     |
| Australia | Australia- | -                 | Flinders        | Flinders         | G1737     | DFO       | 100         | -                           | 18080                     | -        | 141.16   | -20.15     | 141.15     |
| Australia | Australia- | -                 | Leichhardt      | Leichhardt       | G1738     | DFO       | 103         | -                           | 19306                     | -        | 139.81   | -18.75     | 139.75     |
| Australia | Australia- | -                 | Georgina        | Eyre Lake        | G1739     | DFO       | 104         | -                           | 177810                    | -        | 139.81   | -23.55     | 139.75     |
| Australia | Australia- | -                 | Diamantina      | Eyre Lake        | G1740     | DFO       | 105         | -                           | 54139                     | -        | 141.07   | -23.75     | 141.05     |
| Australia | Australia- | -                 | Thomson         | Eyre Lake        | G1741     | DFO       | 106         | -                           | 64606                     | -        | 143.77   | -23.75     | 143.75     |
| Australia | Australia- | -                 | Cooper Creek    | Eyre Lake        | G1742     | DFO       | 107         | -                           | 142471                    | -        | 142.69   | -25.55     | 142.65     |
| Australia | Australia- | -                 | Murrumbidgee    | Murray           | G1971     | DFO       | 2379        | -                           | 31626                     | -        | 146.47   | -34.75     | 146.45     |
| Australia | Australia- | -                 | Darling         | Murray           | G1978     | DFO       | 10509       | -                           | 460416                    | -        | 142.36   | -33.05     | 142.35     |
| Australia | Australia- | -                 | -               | -                | G5663     | Synthetic | -           | -                           | 12965                     | -        | -        | -14.85     | 134.55     |
| Australia | Australia- | -                 | -               | -                | G5671     | Synthetic | -           | -                           | 81289                     | -        | -        | -15.35     | 130.25     |
| Australia | Australia- | -                 | -               | -                | G5672     | Synthetic | -           | -                           | 14033                     | -        | -        | -15.35     | 142.05     |
| Australia | Australia- | -                 | -               | -                | G5679     | Synthetic | -           | -                           | 15343                     | -        | -        | -15.55     | 130.05     |
| Australia | Australia- | Trimbles Crossing | Walsh River     | Mitchell         | G5700     | BOM       | 919309      | 8638                        | 9015                      | -        | 143.78   | -16.65     | 143.85     |
| Australia | Australia- | O K Bridge        | Mitchell River  | Mitchell         | G5704     | BOM       | 919003      | 7734                        | 7421                      | -        | 144.28   | -16.55     | 144.35     |
| Australia | Australia- | -                 | -               | -                | G5730     | Synthetic | -           | -                           | 28160                     | -        | -        | -17.55     | 141.05     |
| Australia | Australia- | -                 | -               | -                | G5744     | Synthetic | -           | -                           | 24502                     | -        | -        | -17.95     | 139.15     |
| Australia | Australia- | -                 | -               | -                | G5749     | Synthetic | -           | -                           | 21360                     | -        | -        | -18.05     | 125.75     |
| Australia | Australia- | -                 | -               | -                | G5750     | Synthetic | -           | -                           | 17846                     | -        | -        | -18.05     | 139.15     |
| Australia | Australia- | -                 | -               | -                | G5767     | Synthetic | -           | -                           | 44831                     | -        | -        | -18.65     | 140.65     |
| Australia | Australia- | -                 | -               | -                | G5768     | Synthetic | -           | -                           | 54774                     | -        | -        | -18.65     | 140.75     |
| Australia | Australia- | Railway Bridge    | Katherine River | Daly             | G5776     | BOM       | 8140001     | 8357                        | 8153                      | -        | 132.25   | -14.35     | 132.35     |
| Australia | Australia- | -                 | -               | -                | G5777     | Synthetic | -           | -                           | 34612                     | -        | -        | -18.95     | 135.65     |
| Australia | Australia- | -                 | -               | -                | G5788     | Synthetic | -           | -                           | 25197                     | -        | -        | -19.45     | 133.35     |
| Australia | Australia- | -                 | -               | -                | G5789     | Synthetic | -           | -                           | 33294                     | -        | -        | -19.55     | 127.65     |
| Australia | Australia- | -                 | -               | -                | G5792     | Synthetic | -           | -                           | 14241                     | -        | -        | -19.65     | 127.75     |
| Australia | Australia- | -                 | -               | -                | G5793     | Synthetic | -           | -                           | 26139                     | -        | -        | -19.65     | 133.45     |
| Australia | Australia- | -                 | -               | -                | G5803     | Synthetic | -           | -                           | 32891                     | -        | -        | -20.15     | 141.85     |
| Australia | Australia- | -                 | -               | -                | G5806     | Synthetic | -           | -                           | 11268                     | -        | -        | -20.25     | 141.75     |
| Australia | Australia- | -                 | -               | -                | G5812     | Synthetic | -           | -                           | 16343                     | -        | -        | -20.55     | 137.65     |
| Australia | Australia- | -                 | -               | -                | G5813     | Synthetic | -           | -                           | 13639                     | -        | -        | -20.55     | 137.75     |
| Australia | Australia- | Abergowrie        | Herbert River   | -                | G5814     | BOM       | 116006      | 7487                        | 7456                      | -        | 145.93   | -18.45     | 145.95     |
| Australia | Australia- | -                 | -               | -                | G5819     | Synthetic | -           | -                           | 71197                     | -        | -        | -20.65     | 146.95     |
| Australia | Australia- | -                 | -               | -                | G5822     | Synthetic | -           | -                           | 30430                     | -        | -        | -20.75     | 137.75     |
| Australia | Australia- | -                 | -               | -                | G5828     | Synthetic | -           | -                           | 13935                     | -        | -        | -20.85     | 137.65     |
| Australia | Australia- | -                 | -               | -                | G5829     | Synthetic | -           | -                           | 19358                     | -        | -        | -20.85     | 146.75     |
| Australia | Australia- | -                 | -               | -                | G5836     | Synthetic | -           | -                           | 49858                     | -        | -        | -20.95     | 137.85     |



| Country   | Continent  | Station Name | River Name       | River Basin | GloFAS ID | Provider  | Provider ID | Catchment Area Provided km² | Catchment Area GloFAS km² | LAT Prov | LON Prov | LAT GloFAS | LON GloFAS |
|-----------|------------|--------------|------------------|-------------|-----------|-----------|-------------|-----------------------------|---------------------------|----------|----------|------------|------------|
| Australia | Australia- | -            | -                | -           | G5837     | Synthetic | -           | -                           | 49826                     | -        | -        | -20.95     | 146.85     |
| Australia | Australia- | -            | -                | -           | G5844     | Synthetic | -           | -                           | 31920                     | -        | -        | -21.15     | 137.85     |
| Australia | Australia- | -            | -                | -           | G5849     | Synthetic | -           | -                           | 33960                     | -        | -        | -21.55     | 146.85     |
| Australia | Australia- | -            | -                | -           | G5866     | Synthetic | -           | -                           | 13048                     | -        | -        | -22.55     | 128.85     |
| Australia | Australia- | -            | -                | -           | G5867     | Synthetic | -           | -                           | 24777                     | -        | -        | -22.55     | 128.95     |
| Australia | Australia- | -            | -                | -           | G5875     | Synthetic | -           | -                           | 23890                     | -        | -        | -22.85     | 138.75     |
| Australia | Australia- | -            | -                | -           | G5876     | Synthetic | -           | -                           | 114201                    | -        | -        | -22.85     | 138.85     |
| Australia | Australia- | -            | -                | -           | G5877     | Synthetic | -           | -                           | 21739                     | -        | -        | -22.85     | 149.25     |
| Australia | Australia- | -            | -                | -           | G5881     | Synthetic | -           | -                           | 50282                     | -        | -        | -22.95     | 149.25     |
| Australia | Australia- | -            | -                | -           | G5884     | Synthetic | -           | -                           | 146305                    | -        | -        | -23.15     | 139.55     |
| Australia | Australia- | -            | -                | -           | G5885     | Synthetic | -           | -                           | 16575                     | -        | -        | -23.15     | 139.65     |
| Australia | Australia- | -            | -                | -           | G5889     | Synthetic | -           | -                           | 17901                     | -        | -        | -23.35     | 122.65     |
| Australia | Australia- | -            | -                | -           | G5890     | Synthetic | -           | -                           | 25095                     | -        | -        | -23.35     | 122.75     |
| Australia | Australia- | -            | -                | -           | G5891     | Synthetic | -           | -                           | 16054                     | -        | -        | -23.55     | 148.15     |
| Australia | Australia- | -            | -                | -           | G5893     | Synthetic | -           | -                           | 77247                     | -        | -        | -23.55     | 149.75     |
| Australia | Australia- | -            | -                | -           | G5895     | Synthetic | -           | -                           | 15794                     | -        | -        | -23.65     | 148.55     |
| Australia | Australia- | -            | -                | -           | G5896     | Synthetic | -           | -                           | 46921                     | -        | -        | -23.75     | 149.75     |
| Australia | Australia- | -            | -                | -           | G5901     | Synthetic | -           | -                           | 12588                     | -        | -        | -23.95     | 144.95     |
| Australia | Australia- | -            | -                | -           | G5904     | Synthetic | -           | -                           | 16419                     | -        | -        | -24.05     | 144.95     |
| Australia | Australia- | -            | -                | -           | G5909     | Synthetic | -           | -                           | 13037                     | -        | -        | -24.85     | 130.95     |
| Australia | Australia- | -            | -                | -           | G5910     | Synthetic | -           | -                           | 20610                     | -        | -        | -24.85     | 138.65     |
| Australia | Australia- | -            | -                | -           | G5912     | Synthetic | -           | -                           | 20582                     | -        | -        | -24.95     | 115.25     |
| Australia | Australia- | -            | -                | -           | G5913     | Synthetic | -           | -                           | 194536                    | -        | -        | -24.95     | 138.65     |
| Australia | Australia- | -            | -                | -           | G5915     | Synthetic | -           | -                           | 45758                     | -        | -        | -25.05     | 115.25     |
| Australia | Australia- | -            | -                | -           | G5916     | Synthetic | -           | -                           | 88626                     | -        | -        | -25.15     | 142.95     |
| Australia | Australia- | -            | -                | -           | G5920     | Synthetic | -           | -                           | 51181                     | -        | -        | -25.25     | 142.95     |
| Australia | Australia- | -            | -                | -           | G5929     | Synthetic | -           | -                           | 73016                     | -        | -        | -25.55     | 140.35     |
| Australia | Australia- | -            | -                | -           | G5932     | Synthetic | -           | -                           | 22356                     | -        | -        | -25.65     | 140.35     |
| Australia | Australia- | -            | -                | -           | G5934     | Synthetic | -           | -                           | 142683                    | -        | -        | -25.75     | 142.45     |
| Australia | Australia- | -            | -                | -           | G5941     | Synthetic | -           | -                           | 16243                     | -        | -        | -26.15     | 122.25     |
| Australia | Australia- | -            | -                | -           | G5948     | Synthetic | -           | -                           | 15336                     | -        | -        | -26.55     | 146.05     |
| Australia | Australia- | -            | -                | -           | G5949     | Synthetic | -           | -                           | 16450                     | -        | -        | -26.55     | 146.15     |
| Australia | Australia- | -            | -                | -           | G5950     | Synthetic | -           | -                           | 18574                     | -        | -        | -26.65     | 127.35     |
| Australia | Australia- | -            | -                | -           | G5951     | Synthetic | -           | -                           | 13416                     | -        | -        | -26.65     | 127.45     |
| Australia | Australia- | -            | -                | -           | G5952     | Synthetic | -           | -                           | 15974                     | -        | -        | -26.65     | 141.75     |
| Australia | Australia- | -            | -                | -           | G5953     | Synthetic | -           | -                           | 165626                    | -        | -        | -26.75     | 141.95     |
| Australia | Australia- | -            | -                | -           | G5957     | Synthetic | -           | -                           | 220351                    | -        | -        | -26.85     | 138.85     |
| Australia | Australia- | Birdsville   | Diamantina River | Eyre Lake   | G5958     | BOM       | 20101       | 119034                      | 110100                    | -        | 139.36   | -26.55     | 139.35     |
| Australia | Australia- | -            | -                | -           | G5961     | Synthetic | -           | -                           | 17503                     | -        | -        | -27.05     | 135.55     |



| Country   | Continent  | Station Name    | River Name   | River Basin | GloFAS ID | Provider  | Provider ID | Catchment Area Provided km² | Catchment Area GloFAS km² | LAT Prov | LON Prov | LAT GloFAS | LON GloFAS |
|-----------|------------|-----------------|--------------|-------------|-----------|-----------|-------------|-----------------------------|---------------------------|----------|----------|------------|------------|
| Australia | Australia- | -               | -            | -           | G5962     | Synthetic | -           | -                           | 15966                     | -        | -        | -27.15     | 135.45     |
| Australia | Australia- | -               | -            | -           | G5969     | Synthetic | -           | -                           | 192529                    | -        | -        | -27.55     | 141.45     |
| Australia | Australia- | -               | -            | -           | G5972     | Synthetic | -           | -                           | 23769                     | -        | -        | -27.65     | 141.45     |
| Australia | Australia- | -               | -            | -           | G5975     | Synthetic | -           | -                           | 52760                     | -        | -        | -27.75     | 148.75     |
| Australia | Australia- | -               | -            | -           | G5976     | Synthetic | -           | -                           | 18303                     | -        | -        | -27.85     | 148.55     |
| Australia | Australia- | Neales          | Neales       | Eyre Lake   | G5978     | DFO       | -           | -                           | 8352                      | -        | 135.80   | -27.85     | 135.85     |
| Australia | Australia- | -               | -            | -           | G5979     | Synthetic | -           | -                           | 46603                     | -        | -        | -28.15     | 137.15     |
| Australia | Australia- | -               | -            | -           | G5981     | Synthetic | -           | -                           | 78895                     | -        | -        | -28.35     | 137.15     |
| Australia | Australia- | -               | -            | -           | G5982     | Synthetic | -           | -                           | 350201                    | -        | -        | -28.35     | 137.25     |
| Australia | Australia- | -               | -            | -           | G5983     | Synthetic | -           | -                           | 235572                    | -        | -        | -28.35     | 137.35     |
| Australia | Australia- | -               | -            | -           | G5987     | Synthetic | -           | -                           | 262859                    | -        | -        | -28.45     | 137.25     |
| Australia | Australia- | -               | -            | -           | G5989     | Synthetic | -           | -                           | 27084                     | -        | -        | -28.55     | 137.35     |
| Australia | Australia- | -               | -            | -           | G5990     | Synthetic | -           | -                           | 11257                     | -        | -        | -28.55     | 149.45     |
| Australia | Australia- | -               | -            | -           | G5991     | Synthetic | -           | -                           | 22831                     | -        | -        | -28.55     | 149.55     |
| Australia | Australia- | -               | -            | -           | G5994     | Synthetic | -           | -                           | 10694                     | -        | -        | -28.95     | 147.15     |
| Australia | Australia- | -               | -            | -           | G5997     | Synthetic | -           | -                           | 15092                     | -        | -        | -29.05     | 116.35     |
| Australia | Australia- | -               | -            | -           | G5998     | Synthetic | -           | -                           | 14012                     | -        | -        | -29.05     | 137.75     |
| Australia | Australia- | -               | -            | -           | G5999     | Synthetic | -           | -                           | 11954                     | -        | -        | -29.05     | 137.85     |
| Australia | Australia- | -               | -            | -           | G6000     | Synthetic | -           | -                           | 13700                     | -        | -        | -29.05     | 146.85     |
| Australia | Australia- | -               | -            | -           | G6001     | Synthetic | -           | -                           | 10947                     | -        | -        | -29.05     | 146.95     |
| Australia | Australia- | -               | -            | -           | G6002     | Synthetic | -           | -                           | 13598                     | -        | -        | -29.25     | 116.45     |
| Australia | Australia- | -               | -            | -           | G6003     | Synthetic | -           | -                           | 33254                     | -        | -        | -29.25     | 146.75     |
| Australia | Australia- | -               | -            | -           | G6004     | Synthetic | -           | -                           | 90326                     | -        | -        | -29.35     | 146.85     |
| Australia | Australia- | -               | -            | -           | G6013     | Synthetic | -           | -                           | 85208                     | -        | -        | -29.95     | 148.15     |
| Australia | Australia- | -               | -            | -           | G6015     | Synthetic | -           | -                           | 37760                     | -        | -        | -30.05     | 148.15     |
| Australia | Australia- | -               | -            | -           | G6021     | Synthetic | -           | -                           | 34206                     | -        | -        | -30.25     | 147.55     |
| Australia | Australia- | -               | -            | -           | G6022     | Synthetic | -           | -                           | 52165                     | -        | -        | -30.35     | 145.35     |
| Australia | Australia- | -               | -            | -           | G6023     | Synthetic | -           | -                           | 28794                     | -        | -        | -30.45     | 144.05     |
| Australia | Australia- | -               | -            | -           | G6024     | Synthetic | -           | -                           | 11364                     | -        | -        | -30.45     | 144.15     |
| Australia | Australia- | -               | -            | -           | G6027     | Synthetic | -           | -                           | 32609                     | -        | -        | -30.85     | 139.85     |
| Australia | Australia- | -               | -            | -           | G6029     | Synthetic | -           | -                           | 11378                     | -        | -        | -30.95     | 118.25     |
| Australia | Australia- | -               | -            | -           | G6030     | Synthetic | -           | -                           | 14228                     | -        | -        | -30.95     | 139.95     |
| Australia | Australia- | -               | -            | -           | G6032     | Synthetic | -           | -                           | 17794                     | -        | -        | -31.05     | 139.85     |
| Australia | Australia- | -               | -            | -           | G6033     | Synthetic | -           | -                           | 21046                     | -        | -        | -31.15     | 118.25     |
| Australia | Australia- | -               | -            | -           | G6034     | Synthetic | -           | -                           | 14277                     | -        | -        | -31.15     | 137.75     |
| Australia | Australia- | -               | -            | -           | G6035     | Synthetic | -           | -                           | 10360                     | -        | -        | -31.35     | 137.85     |
| Australia | Australia- | Pine Plantation | Darkin River | -           | G6039     | BOM       | 616002      | 642                         | 575                       | -        | 116.29   | -32.05     | 116.35     |
| Australia | Australia- | -               | -            | -           | G6040     | Synthetic | -           | -                           | 41780                     | -        | -        | -31.75     | 117.65     |
| Australia | Australia- | -               | -            | -           | G6041     | Synthetic | -           | -                           | 19230                     | -        | -        | -31.85     | 117.75     |

| Country     | Continent  | Station Name           | River Name           | River Basin      | GloFAS ID | Provider  | Provider ID | Catchment Area Provided km² | Catchment Area GloFAS km² | LAT Prov | LON Prov | LAT GloFAS | LON GloFAS |
|-------------|------------|------------------------|----------------------|------------------|-----------|-----------|-------------|-----------------------------|---------------------------|----------|----------|------------|------------|
| Australia   | Australia- | below Lobbs Hole Creek | Murrumbidgee River   | Murray           | G6048     | BOM       | -           | 5158                        | 5055                      | -        | 149.10   | -35.45     | 149.05     |
| Australia   | Australia- | -                      | -                    | -                | G6049     | Synthetic | -           | -                           | 13163                     | -        | -        | -33.15     | 146.85     |
| Australia   | Australia- | -                      | -                    | -                | G6056     | Synthetic | -           | -                           | 10498                     | -        | -        | -34.25     | 144.55     |
| Australia   | Australia- | -                      | -                    | -                | G6061     | Synthetic | -           | -                           | 48252                     | -        | -        | -35.45     | 143.85     |
| Australia   | Australia- | -                      | -                    | -                | G6064     | Synthetic | -           | -                           | 14586                     | -        | -        | -35.55     | 143.85     |
| Australia   | Australia- | Wangaratta North       | Reedy Creek          | Murray           | G6067     | BOM       | 403209      | 5506                        | 5410                      | -        | 146.34   | -36.15     | 146.25     |
| Australia   | Australia- | -                      | -                    | -                | G6070     | Synthetic | -           | -                           | 15254                     | -        | -        | -36.15     | 144.85     |
| New Zealand | Australia- | Ngaruawahia            | Waikato              | Waikato          | G1509     | GRDC      | 5865300     | 11395                       | 11392                     | -        | 175.14   | -37.65     | 175.15     |
| New Zealand | Australia- | Clyde                  | Clutha               | Clutha           | G1512     | GRDC      | 5868050     | 12018                       | 12248                     | -        | 169.32   | -45.25     | 169.35     |
| New Zealand | Australia- | Balclutha              | Clutha               | Clutha           | G1513     | GRDC      | 5868100     | 20582                       | 16345                     | -        | 169.74   | -46.35     | 169.75     |
| Australia   | Australia- | Mount Nancar           | Daly                 | Daly             | G1325     | GRDC      | 5708145     | 47100                       | 46243                     | -        | 130.73   | -13.95     | 130.85     |
| Australia   | Australia- | Red Rock               | Roper                | Roper            | G1333     | BOM       | 9030250     | 43476                       | 43219                     | -        | 134.41   | -14.65     | 134.45     |
| Australia   | Australia- | Kalpowar Crossing      | Normanby             | -                | G1337     | GRDC      | 5101071     | 12930                       | 12983                     | -        | 144.21   | -14.85     | 144.15     |
| Australia   | Australia- | Coolibah Homestead     | Victoria             | Victoria         | G1347     | GRDC      | 5708110     | 44900                       | 44297                     | -        | 130.96   | -16.85     | 131.25     |
| Australia   | Australia- | Tarrara Bar            | Ord                  | Ord              | G1349     | GRDC      | 5608096     | 51028                       | 51268                     | -15.56   | 128.69   | -15.55     | 128.35     |
| Australia   | Australia- | Victoria Highway       | West Baines          | Victoria         | G1356     | GRDC      | 5708126     | 10204                       | 10100                     | -        | 129.73   | -15.95     | 129.75     |
| Australia   | Australia- | Koolatah               | Mitchell             | Mitchell         | G1358     | GRDC      | 5109200     | 45872                       | 45866                     | -        | 142.37   | -15.75     | 142.15     |
| Australia   | Australia- | Borrooloola Crossing   | Macarthur            | Macarthur        | G1360     | GRDC      | 5709112     | 15700                       | 14940                     | -16.08   | 136.31   | -15.95     | 136.45     |
| Australia   | Australia- | M I M Pump             | Macarthur            | Macarthur        | G1365     | GRDC      | 5709110     | 10400                       | 10184                     | -        | 136.08   | -16.45     | 136.05     |
| Australia   | Australia- | Old Ord Homestead      | Ord                  | Ord              | G1371     | GRDC      | 5608095     | 19513                       | 19645                     | -        | 128.85   | -17.25     | 128.85     |
| Australia   | Australia- | Dimond Gorge           | Fitzroy              | Fitzroy (Western | G1377     | GRDC      | 5608023     | 17152                       | 17221                     | -        | 126.02   | -17.75     | 125.95     |
| Australia   | Australia- | Willare                | Fitzroy              | Fitzroy (Western | G1379     | GRDC      | 5608025     | 91902                       | 92204                     | -17.75   | 123.5    | -17.85     | 123.65     |
| Australia   | Australia- | Glenore Weir           | Norman               | Flinders         | G1380     | GRDC      | 5109161     | 39360                       | 38249                     | -        | 141.13   | -17.85     | 141.15     |
| Australia   | Australia- | Walkers Bend           | Flinders             | Flinders         | G1383     | GRDC      | 5109151     | 106300                      | 105640                    | -        | 140.85   | -17.65     | 140.75     |
| Australia   | Australia- | Rockfields             | Gilbert              | Gilbert          | G1384     | GRDC      | 5109170     | 10987                       | 10816                     | -        | 142.87   | -18.25     | 142.95     |
| Australia   | Australia- | Fitzroy Crossing       | Fitzroy              | Fitzroy (Western | G1385     | GRDC      | 5608024     | 46133                       | 46440                     | -        | 125.57   | -18.45     | 125.25     |
| Australia   | Australia- | Floraville Homestead   | Leichhardt           | Leichhardt       | G1386     | GRDC      | 5109210     | 23660                       | 23412                     | -        | 139.88   | -18.15     | 139.85     |
| Australia   | Australia- | Gregory Downs          | Gregory              | -                | G1390     | GRDC      | 5109110     | 12690                       | 12592                     | -        | 139.25   | -18.85     | 139.05     |
| Australia   | Australia- | Home Hill              | Burdekin             | Burdekin         | G1396     | GRDC      | 5101201     | 129939                      | 125304                    | -        | 147.39   | -19.65     | 147.45     |
| Australia   | Australia- | Clare                  | Burdekin             | Burdekin         | G1397     | GRDC      | 5101200     | 129900                      | 125304                    | -        | 147.24   | -19.65     | 147.45     |
| Australia   | Australia- | Coolenar Pool          | De Grey              | De Grey          | G1402     | GRDC      | 5607500     | 50007                       | 51283                     | -        | 119.24   | -20.35     | 119.25     |
| Australia   | Australia- | Jimbegnyinoo Pool      | Fortescue            | Fortescue        | G1407     | GRDC      | 5607450     | 18371                       | 18340                     | -        | 116.15   | -22.45     | 119.65     |
| Australia   | Australia- | Nanutarra              | Ashburton            | Ashburton        | G1419     | GRDC      | 5607400     | 71387                       | 70749                     | -        | 115.49   | -22.55     | 115.35     |
| Australia   | Australia- | The Gap                | Fitzroy (Queensland) | Fitzroy          | G1421     | GRDC      | 5101301     | 135757                      | 134951                    | -        | 150.10   | -23.55     | 150.65     |
| Australia   | Australia- | Nune Mile Bridge       | Gascoyne             | -                | G1432     | GRDC      | 5607200     | 73432                       | 71792                     | -        | 113.76   | -24.85     | 113.65     |
| Australia   | Australia- | Walla                  | Burnett              | -                | G1435     | GRDC      | 5101470     | 32455                       | 31430                     | -        | 151.98   | -24.85     | 152.35     |
| Australia   | Australia- | Savages Crossing       | Brisbane             | -                | G1448     | GRDC      | 5101500     | 10170                       | 9959                      | -27.44   | 152.66   | -27.55     | 152.75     |
| Australia   | Australia- | Cullyamurra Water Hole | Cooper Creek         | Eyre Lake        | G1451     | BOM       | 30501       | 230000                      | 229972                    | -        | 140.84   | -28.45     | 138.95     |
| Australia   | Australia- | Emu Springs            | Murchison            | Murchison        | G1452     | GRDC      | 5607100     | 86777                       | 61922                     | -        | 114.54   | -27.65     | 114.15     |

| Country   | Continent  | Station Name              | River Name    | River Basin      | GloFAS ID | Provider | Provider ID | Catchment Area Provided km² | Catchment Area GloFAS km² | LAT Prov | LON Prov | LAT GloFAS | LON GloFAS |
|-----------|------------|---------------------------|---------------|------------------|-----------|----------|-------------|-----------------------------|---------------------------|----------|----------|------------|------------|
| Australia | Australia- | Caiwarro                  | Paroo River   | Murray           | G1456     | BOM      | 424002      | 21446                       | 23109                     | -        | 144.78   | -29.25     | 144.45     |
| Australia | Australia- | Brenda                    | Culgoa        | Murray           | G1458     | GRDC     | 5204460     | -                           | 78826                     | -        | 147.30   | -29.05     | 147.35     |
| Australia | Australia- | Mogil Mogil               | Barwon        | Murray           | G1462     | GRDC     | 5204452     | 64800                       | 61181                     | -        | 148.68   | -29.35     | 148.65     |
| Australia | Australia- | Yarraman Bridge           | Gwydir        | Murray           | G1463     | GRDC     | 5204181     | 12960                       | 12936                     | -        | 149.84   | -29.25     | 149.25     |
| Australia | Australia- | Lilydale Newbold Crossing | Clarence      | -                | G1464     | GRDC     | 5202044     | 16690                       | 16342                     | -        | 152.68   | -29.55     | 152.75     |
| Australia | Australia- | Brewarrina                | Barwon        | Murray           | G1467     | GRDC     | 5204450     | 297850                      | 196926                    | -        | 146.86   | -29.95     | 146.45     |
| Australia | Australia- | Dangar Bridge Walgett     | Barwon        | Murray           | G1468     | GRDC     | 5204451     | 132200                      | 125565                    | -        | 148.06   | -30.05     | 147.65     |
| Australia | Australia- | Bourke Town               | Darling       | Murray           | G1470     | GRDC     | 5204255     | 386000                      | 381294                    | -        | 145.93   | -30.35     | 145.55     |
| Australia | Australia- | Louth                     | Darling       | Murray           | G1474     | GRDC     | 5204250     | 489300                      | 435628                    | -        | 145.11   | -30.55     | 145.05     |
| Australia | Australia- | Menindee U S Weir 32      | Darling       | Murray           | G1482     | GRDC     | 5204252     | 575000                      | 459468                    | -        | 142.37   | -32.65     | 142.35     |
| Australia | Australia- | Singleton                 | Hunter        | -                | G1484     | GRDC     | 5202103     | 16400                       | 16237                     | -        | 151.17   | -32.65     | 151.45     |
| Australia | Australia- | D S Burrendong Dam        | Macquairie    | Murray           | G1485     | GRDC     | 5204401     | 13980                       | 14046                     | -        | 149.08   | -32.65     | 148.95     |
| Australia | Australia- | Greta                     | Hunter        | -                | G1486     | GRDC     | 5202102     | 17320                       | 17570                     | -        | 151.40   | -32.75     | 151.55     |
| Australia | Australia- | Wycot                     | Great Darling | Murray           | G1487     | GRDC     | 5204253     | -                           | 6029                      | -        | 142.05   | -32.95     | 142.05     |
| Australia | Australia- | Forbes Cottons Weir       | Lachlan       | Murray           | G1492     | GRDC     | 5204301     | 19000                       | 19628                     | -        | 147.99   | -33.45     | 147.75     |
| Australia | Australia- | Burtundy                  | Darling       | Murray           | G1494     | GRDC     | 5204251     | 647200                      | 463121                    | -        | 142.26   | -34.05     | 141.85     |
| Australia | Australia- | Penrith                   | Nepean        | -                | G1495     | GRDC     | 5202135     | 11000                       | 10964                     | -        | 150.68   | -33.65     | 150.65     |
| Australia | Australia- | Booligal                  | Lachlan       | Murray           | G1497     | GRDC     | 5204300     | 55900                       | 55898                     | -        | 144.88   | -34.05     | 144.65     |
| Australia | Australia- | Darradup                  | Blackwood     | Blackwood        | G1498     | GRDC     | 5606100     | 11593                       | 12730                     | -        | 115.61   | -33.55     | 116.85     |
| Australia | Australia- | Overland Corner 417 5     | Murray        | Murray           | G1499     | GRDC     | 5404270     | 1000001                     | 704854                    | -        | 140.27   | -34.15     | 140.25     |
| Australia | Australia- | Lock 1 Downstream         | Murray        | Murray           | G1500     | GRDC     | 5404271     | -                           | 713793                    | -        | 139.61   | -34.35     | 139.65     |
| Australia | Australia- | D S Maude Weir            | Murrumbidgee  | Murray           | G1502     | GRDC     | 5204101     | 57700                       | 35746                     | -        | 144.30   | -34.35     | 144.05     |
| Australia | Australia- | D S Balranald Weir        | Murrumbidgee  | Murray           | G1503     | GRDC     | 5204106     | 166000                      | 121611                    | -        | 143.49   | -34.65     | 143.25     |
| Australia | Australia- | Narrandera                | Murrumbidgee  | Murray           | G1504     | GRDC     | 5204102     | 34200                       | 34188                     | -        | 146.54   | -34.55     | 144.75     |
| Australia | Australia- | Below Wakool Junction     | Murray        | Murray           | G1506     | GRDC     | 5304140     | -                           | 100516                    | -        | 143.34   | -34.85     | 143.35     |
| Australia | Australia- | D S Burrinjuck Dam        | Murrumbidgee  | Murray           | G1507     | GRDC     | 5204104     | 13100                       | 14003                     | -        | 148.57   | -34.85     | 148.35     |
| Australia | Australia- | Gundagai                  | Murrumbidgee  | Murray           | G1508     | GRDC     | 5204103     | 21100                       | 21218                     | -        | 148.10   | -35.05     | 147.75     |
| Australia | Australia- | Jarrahmond                | Snowy         | -                | G1510     | GRDC     | 5302229     | 13421                       | 12446                     | -        | 148.36   | -37.75     | 148.45     |
| Australia | Australia- | Dartmoor                  | Glenelg       | -                | G1511     | GRDC     | 5302400     | 11914                       | 11890                     | -        | 141.28   | -38.05     | 140.95     |
| Australia | Australia- | -                         | Fitzroy       | Fitzroy (Western | G1708     | DFO      | 15          | -                           | 45639                     | -        | 125.41   | -18.35     | 125.45     |
| Australia | Australia- | -                         | Flinders      | Flinders         | G1736     | DFO      | 99          | -                           | 40182                     | -        | 140.80   | -19.35     | 140.75     |
| Australia | Australia- | -                         | Flinders      | Flinders         | G1737     | DFO      | 100         | -                           | 18080                     | -        | 141.16   | -20.15     | 141.15     |
| Australia | Australia- | -                         | Leichhardt    | Leichhardt       | G1738     | DFO      | 103         | -                           | 19306                     | -        | 139.81   | -18.75     | 139.75     |
| Australia | Australia- | -                         | Georgina      | Eyre Lake        | G1739     | DFO      | 104         | -                           | 177810                    | -        | 139.81   | -23.55     | 139.75     |
| Australia | Australia- | -                         | Diamantina    | Eyre Lake        | G1740     | DFO      | 105         | -                           | 54139                     | -        | 141.07   | -23.75     | 141.05     |
| Australia | Australia- | -                         | Thomson       | Eyre Lake        | G1741     | DFO      | 106         | -                           | 64606                     | -        | 143.77   | -23.75     | 143.75     |
| Australia | Australia- | -                         | Cooper Creek  | Eyre Lake        | G1742     | DFO      | 107         | -                           | 142471                    | -        | 142.69   | -25.55     | 142.65     |
| Australia | Australia- | -                         | Murrumbidgee  | Murray           | G1971     | DFO      | 2379        | -                           | 31626                     | -        | 146.47   | -34.75     | 146.45     |
| Australia | Australia- | -                         | Darling       | Murray           | G1978     | DFO      | 10509       | -                           | 460416                    | -        | 142.36   | -33.05     | 142.35     |

| Country   | Continent  | Station Name      | River Name      | River Basin | GloFAS ID | Provider  | Provider ID | Catchment Area Provided km² | Catchment Area GloFAS km² | LAT Prov | LON Prov | LAT GloFAS | LON GloFAS |
|-----------|------------|-------------------|-----------------|-------------|-----------|-----------|-------------|-----------------------------|---------------------------|----------|----------|------------|------------|
| Australia | Australia- | -                 | -               | -           | G5663     | Synthetic | -           | -                           | 12965                     | -        | -        | -14.85     | 134.55     |
| Australia | Australia- | -                 | -               | -           | G5671     | Synthetic | -           | -                           | 81289                     | -        | -        | -15.35     | 130.25     |
| Australia | Australia- | -                 | -               | -           | G5672     | Synthetic | -           | -                           | 14033                     | -        | -        | -15.35     | 142.05     |
| Australia | Australia- | -                 | -               | -           | G5679     | Synthetic | -           | -                           | 15343                     | -        | -        | -15.55     | 130.05     |
| Australia | Australia- | Trimbles Crossing | Walsh River     | Mitchell    | G5700     | BOM       | 919309      | 8638                        | 9015                      | -        | 143.78   | -16.65     | 143.85     |
| Australia | Australia- | O K Bridge        | Mitchell River  | Mitchell    | G5704     | BOM       | 919003      | 7734                        | 7421                      | -        | 144.28   | -16.55     | 144.35     |
| Australia | Australia- | -                 | -               | -           | G5730     | Synthetic | -           | -                           | 28160                     | -        | -        | -17.55     | 141.05     |
| Australia | Australia- | -                 | -               | -           | G5744     | Synthetic | -           | -                           | 24502                     | -        | -        | -17.95     | 139.15     |
| Australia | Australia- | -                 | -               | -           | G5749     | Synthetic | -           | -                           | 21360                     | -        | -        | -18.05     | 125.75     |
| Australia | Australia- | -                 | -               | -           | G5750     | Synthetic | -           | -                           | 17846                     | -        | -        | -18.05     | 139.15     |
| Australia | Australia- | -                 | -               | -           | G5767     | Synthetic | -           | -                           | 44831                     | -        | -        | -18.65     | 140.65     |
| Australia | Australia- | -                 | -               | -           | G5768     | Synthetic | -           | -                           | 54774                     | -        | -        | -18.65     | 140.75     |
| Australia | Australia- | Railway Bridge    | Katherine River | Daly        | G5776     | BOM       | 8140001     | 8357                        | 8153                      | -        | 132.25   | -14.35     | 132.35     |
| Australia | Australia- | -                 | -               | -           | G5777     | Synthetic | -           | -                           | 34612                     | -        | -        | -18.95     | 135.65     |
| Australia | Australia- | -                 | -               | -           | G5788     | Synthetic | -           | -                           | 25197                     | -        | -        | -19.45     | 133.35     |
| Australia | Australia- | -                 | -               | -           | G5789     | Synthetic | -           | -                           | 33294                     | -        | -        | -19.55     | 127.65     |
| Australia | Australia- | -                 | -               | -           | G5792     | Synthetic | -           | -                           | 14241                     | -        | -        | -19.65     | 127.75     |
| Australia | Australia- | -                 | -               | -           | G5793     | Synthetic | -           | -                           | 26139                     | -        | -        | -19.65     | 133.45     |
| Australia | Australia- | -                 | -               | -           | G5803     | Synthetic | -           | -                           | 32891                     | -        | -        | -20.15     | 141.85     |
| Australia | Australia- | -                 | -               | -           | G5806     | Synthetic | -           | -                           | 11268                     | -        | -        | -20.25     | 141.75     |
| Australia | Australia- | -                 | -               | -           | G5812     | Synthetic | -           | -                           | 16343                     | -        | -        | -20.55     | 137.65     |
| Australia | Australia- | -                 | -               | -           | G5813     | Synthetic | -           | -                           | 13639                     | -        | -        | -20.55     | 137.75     |
| Australia | Australia- | Abergowrie        | Herbert River   | -           | G5814     | BOM       | 116006      | 7487                        | 7456                      | -        | 145.93   | -18.45     | 145.95     |
| Australia | Australia- | -                 | -               | -           | G5819     | Synthetic | -           | -                           | 71197                     | -        | -        | -20.65     | 146.95     |
| Australia | Australia- | -                 | -               | -           | G5822     | Synthetic | -           | -                           | 30430                     | -        | -        | -20.75     | 137.75     |
| Australia | Australia- | -                 | -               | -           | G5828     | Synthetic | -           | -                           | 13935                     | -        | -        | -20.85     | 137.65     |
| Australia | Australia- | -                 | -               | -           | G5829     | Synthetic | -           | -                           | 19358                     | -        | -        | -20.85     | 146.75     |
| Australia | Australia- | -                 | -               | -           | G5836     | Synthetic | -           | -                           | 49858                     | -        | -        | -20.95     | 137.85     |
| Australia | Australia- | -                 | -               | -           | G5837     | Synthetic | -           | -                           | 49826                     | -        | -        | -20.95     | 146.85     |
| Australia | Australia- | -                 | -               | -           | G5844     | Synthetic | -           | -                           | 31920                     | -        | -        | -21.15     | 137.85     |
| Australia | Australia- | -                 | -               | -           | G5849     | Synthetic | -           | -                           | 33960                     | -        | -        | -21.55     | 146.85     |
| Australia | Australia- | -                 | -               | -           | G5866     | Synthetic | -           | -                           | 13048                     | -        | -        | -22.55     | 128.85     |
| Australia | Australia- | -                 | -               | -           | G5867     | Synthetic | -           | -                           | 24777                     | -        | -        | -22.55     | 128.95     |
| Australia | Australia- | -                 | -               | -           | G5875     | Synthetic | -           | -                           | 23890                     | -        | -        | -22.85     | 138.75     |
| Australia | Australia- | -                 | -               | -           | G5876     | Synthetic | -           | -                           | 114201                    | -        | -        | -22.85     | 138.85     |
| Australia | Australia- | -                 | -               | -           | G5877     | Synthetic | -           | -                           | 21739                     | -        | -        | -22.85     | 149.25     |
| Australia | Australia- | -                 | -               | -           | G5881     | Synthetic | -           | -                           | 50282                     | -        | -        | -22.95     | 149.25     |
| Australia | Australia- | -                 | -               | -           | G5884     | Synthetic | -           | -                           | 146305                    | -        | -        | -23.15     | 139.55     |
| Australia | Australia- | -                 | -               | -           | G5885     | Synthetic | -           | -                           | 16575                     | -        | -        | -23.15     | 139.65     |

| Country   | Continent  | Station Name | River Name       | River Basin | GloFAS ID | Provider  | Provider ID | Catchment Area Provided km² | Catchment Area GloFAS km² | LAT Prov | LON Prov | LAT GloFAS | LON GloFAS |
|-----------|------------|--------------|------------------|-------------|-----------|-----------|-------------|-----------------------------|---------------------------|----------|----------|------------|------------|
| Australia | Australia- | -            | -                | -           | G5889     | Synthetic | -           | -                           | 17901                     | -        | -        | -23.35     | 122.65     |
| Australia | Australia- | -            | -                | -           | G5890     | Synthetic | -           | -                           | 25095                     | -        | -        | -23.35     | 122.75     |
| Australia | Australia- | -            | -                | -           | G5891     | Synthetic | -           | -                           | 16054                     | -        | -        | -23.55     | 148.15     |
| Australia | Australia- | -            | -                | -           | G5893     | Synthetic | -           | -                           | 77247                     | -        | -        | -23.55     | 149.75     |
| Australia | Australia- | -            | -                | -           | G5895     | Synthetic | -           | -                           | 15794                     | -        | -        | -23.65     | 148.55     |
| Australia | Australia- | -            | -                | -           | G5896     | Synthetic | -           | -                           | 46921                     | -        | -        | -23.75     | 149.75     |
| Australia | Australia- | -            | -                | -           | G5901     | Synthetic | -           | -                           | 12588                     | -        | -        | -23.95     | 144.95     |
| Australia | Australia- | -            | -                | -           | G5904     | Synthetic | -           | -                           | 16419                     | -        | -        | -24.05     | 144.95     |
| Australia | Australia- | -            | -                | -           | G5909     | Synthetic | -           | -                           | 13037                     | -        | -        | -24.85     | 130.95     |
| Australia | Australia- | -            | -                | -           | G5910     | Synthetic | -           | -                           | 20610                     | -        | -        | -24.85     | 138.65     |
| Australia | Australia- | -            | -                | -           | G5912     | Synthetic | -           | -                           | 20582                     | -        | -        | -24.95     | 115.25     |
| Australia | Australia- | -            | -                | -           | G5913     | Synthetic | -           | -                           | 194536                    | -        | -        | -24.95     | 138.65     |
| Australia | Australia- | -            | -                | -           | G5915     | Synthetic | -           | -                           | 45758                     | -        | -        | -25.05     | 115.25     |
| Australia | Australia- | -            | -                | -           | G5916     | Synthetic | -           | -                           | 88626                     | -        | -        | -25.15     | 142.95     |
| Australia | Australia- | -            | -                | -           | G5920     | Synthetic | -           | -                           | 51181                     | -        | -        | -25.25     | 142.95     |
| Australia | Australia- | -            | -                | -           | G5929     | Synthetic | -           | -                           | 73016                     | -        | -        | -25.55     | 140.35     |
| Australia | Australia- | -            | -                | -           | G5932     | Synthetic | -           | -                           | 22356                     | -        | -        | -25.65     | 140.35     |
| Australia | Australia- | -            | -                | -           | G5934     | Synthetic | -           | -                           | 142683                    | -        | -        | -25.75     | 142.45     |
| Australia | Australia- | -            | -                | -           | G5941     | Synthetic | -           | -                           | 16243                     | -        | -        | -26.15     | 122.25     |
| Australia | Australia- | -            | -                | -           | G5948     | Synthetic | -           | -                           | 15336                     | -        | -        | -26.55     | 146.05     |
| Australia | Australia- | -            | -                | -           | G5949     | Synthetic | -           | -                           | 16450                     | -        | -        | -26.55     | 146.15     |
| Australia | Australia- | -            | -                | -           | G5950     | Synthetic | -           | -                           | 18574                     | -        | -        | -26.65     | 127.35     |
| Australia | Australia- | -            | -                | -           | G5951     | Synthetic | -           | -                           | 13416                     | -        | -        | -26.65     | 127.45     |
| Australia | Australia- | -            | -                | -           | G5952     | Synthetic | -           | -                           | 15974                     | -        | -        | -26.65     | 141.75     |
| Australia | Australia- | -            | -                | -           | G5953     | Synthetic | -           | -                           | 165626                    | -        | -        | -26.75     | 141.95     |
| Australia | Australia- | -            | -                | -           | G5957     | Synthetic | -           | -                           | 220351                    | -        | -        | -26.85     | 138.85     |
| Australia | Australia- | Birdsville   | Diamantina River | Eyre Lake   | G5958     | BOM       | 20101       | 119034                      | 110100                    | -        | 139.36   | -26.55     | 139.35     |
| Australia | Australia- | -            | -                | -           | G5961     | Synthetic | -           | -                           | 17503                     | -        | -        | -27.05     | 135.55     |
| Australia | Australia- | -            | -                | -           | G5962     | Synthetic | -           | -                           | 15966                     | -        | -        | -27.15     | 135.45     |
| Australia | Australia- | -            | -                | -           | G5969     | Synthetic | -           | -                           | 192529                    | -        | -        | -27.55     | 141.45     |
| Australia | Australia- | -            | -                | -           | G5972     | Synthetic | -           | -                           | 23769                     | -        | -        | -27.65     | 141.45     |
| Australia | Australia- | -            | -                | -           | G5975     | Synthetic | -           | -                           | 52760                     | -        | -        | -27.75     | 148.75     |
| Australia | Australia- | -            | -                | -           | G5976     | Synthetic | -           | -                           | 18303                     | -        | -        | -27.85     | 148.55     |
| Australia | Australia- | Neales       | Neales           | Eyre Lake   | G5978     | DFO       | -           | -                           | 8352                      | -        | 135.80   | -27.85     | 135.85     |
| Australia | Australia- | -            | -                | -           | G5979     | Synthetic | -           | -                           | 46603                     | -        | -        | -28.15     | 137.15     |
| Australia | Australia- | -            | -                | -           | G5981     | Synthetic | -           | -                           | 78895                     | -        | -        | -28.35     | 137.15     |
| Australia | Australia- | -            | -                | -           | G5982     | Synthetic | -           | -                           | 350201                    | -        | -        | -28.35     | 137.25     |
| Australia | Australia- | -            | -                | -           | G5983     | Synthetic | -           | -                           | 235572                    | -        | -        | -28.35     | 137.35     |
| Australia | Australia- | -            | -                | -           | G5987     | Synthetic | -           | -                           | 262859                    | -        | -        | -28.45     | 137.25     |

| Country     | Continent  | Station Name           | River Name         | River Basin | GloFAS ID | Provider  | Provider ID | Catchment Area Provided km² | Catchment Area GloFAS km² | LAT Prov | LON Prov | LAT GloFAS | LON GloFAS |
|-------------|------------|------------------------|--------------------|-------------|-----------|-----------|-------------|-----------------------------|---------------------------|----------|----------|------------|------------|
| Australia   | Australia- | -                      | -                  | -           | G5989     | Synthetic | -           | -                           | 27084                     | -        | -        | -28.55     | 137.35     |
| Australia   | Australia- | -                      | -                  | -           | G5990     | Synthetic | -           | -                           | 11257                     | -        | -        | -28.55     | 149.45     |
| Australia   | Australia- | -                      | -                  | -           | G5991     | Synthetic | -           | -                           | 22831                     | -        | -        | -28.55     | 149.55     |
| Australia   | Australia- | -                      | -                  | -           | G5994     | Synthetic | -           | -                           | 10694                     | -        | -        | -28.95     | 147.15     |
| Australia   | Australia- | -                      | -                  | -           | G5997     | Synthetic | -           | -                           | 15092                     | -        | -        | -29.05     | 116.35     |
| Australia   | Australia- | -                      | -                  | -           | G5998     | Synthetic | -           | -                           | 14012                     | -        | -        | -29.05     | 137.75     |
| Australia   | Australia- | -                      | -                  | -           | G5999     | Synthetic | -           | -                           | 11954                     | -        | -        | -29.05     | 137.85     |
| Australia   | Australia- | -                      | -                  | -           | G6000     | Synthetic | -           | -                           | 13700                     | -        | -        | -29.05     | 146.85     |
| Australia   | Australia- | -                      | -                  | -           | G6001     | Synthetic | -           | -                           | 10947                     | -        | -        | -29.05     | 146.95     |
| Australia   | Australia- | -                      | -                  | -           | G6002     | Synthetic | -           | -                           | 13598                     | -        | -        | -29.25     | 116.45     |
| Australia   | Australia- | -                      | -                  | -           | G6003     | Synthetic | -           | -                           | 33254                     | -        | -        | -29.25     | 146.75     |
| Australia   | Australia- | -                      | -                  | -           | G6004     | Synthetic | -           | -                           | 90326                     | -        | -        | -29.35     | 146.85     |
| Australia   | Australia- | -                      | -                  | -           | G6013     | Synthetic | -           | -                           | 85208                     | -        | -        | -29.95     | 148.15     |
| Australia   | Australia- | -                      | -                  | -           | G6015     | Synthetic | -           | -                           | 37760                     | -        | -        | -30.05     | 148.15     |
| Australia   | Australia- | -                      | -                  | -           | G6021     | Synthetic | -           | -                           | 34206                     | -        | -        | -30.25     | 147.55     |
| Australia   | Australia- | -                      | -                  | -           | G6022     | Synthetic | -           | -                           | 52165                     | -        | -        | -30.35     | 145.35     |
| Australia   | Australia- | -                      | -                  | -           | G6023     | Synthetic | -           | -                           | 28794                     | -        | -        | -30.45     | 144.05     |
| Australia   | Australia- | -                      | -                  | -           | G6024     | Synthetic | -           | -                           | 11364                     | -        | -        | -30.45     | 144.15     |
| Australia   | Australia- | -                      | -                  | -           | G6027     | Synthetic | -           | -                           | 32609                     | -        | -        | -30.85     | 139.85     |
| Australia   | Australia- | -                      | -                  | -           | G6029     | Synthetic | -           | -                           | 11378                     | -        | -        | -30.95     | 118.25     |
| Australia   | Australia- | -                      | -                  | -           | G6030     | Synthetic | -           | -                           | 14228                     | -        | -        | -30.95     | 139.95     |
| Australia   | Australia- | -                      | -                  | -           | G6032     | Synthetic | -           | -                           | 17794                     | -        | -        | -31.05     | 139.85     |
| Australia   | Australia- | -                      | -                  | -           | G6033     | Synthetic | -           | -                           | 21046                     | -        | -        | -31.15     | 118.25     |
| Australia   | Australia- | -                      | -                  | -           | G6034     | Synthetic | -           | -                           | 14277                     | -        | -        | -31.15     | 137.75     |
| Australia   | Australia- | -                      | -                  | -           | G6035     | Synthetic | -           | -                           | 10360                     | -        | -        | -31.35     | 137.85     |
| Australia   | Australia- | Pine Plantation        | Darkin River       | -           | G6039     | BOM       | 616002      | 642                         | 575                       | -        | 116.29   | -32.05     | 116.35     |
| Australia   | Australia- | -                      | -                  | -           | G6040     | Synthetic | -           | -                           | 41780                     | -        | -        | -31.75     | 117.65     |
| Australia   | Australia- | -                      | -                  | -           | G6041     | Synthetic | -           | -                           | 19230                     | -        | -        | -31.85     | 117.75     |
| Australia   | Australia- | below Lobbs Hole Creek | Murrumbidgee River | Murray      | G6048     | BOM       | -           | 5158                        | 5055                      | -        | 149.10   | -35.45     | 149.05     |
| Australia   | Australia- | -                      | -                  | -           | G6049     | Synthetic | -           | -                           | 13163                     | -        | -        | -33.15     | 146.85     |
| Australia   | Australia- | -                      | -                  | -           | G6056     | Synthetic | -           | -                           | 10498                     | -        | -        | -34.25     | 144.55     |
| Australia   | Australia- | -                      | -                  | -           | G6061     | Synthetic | -           | -                           | 48252                     | -        | -        | -35.45     | 143.85     |
| Australia   | Australia- | -                      | -                  | -           | G6064     | Synthetic | -           | -                           | 14586                     | -        | -        | -35.55     | 143.85     |
| Australia   | Australia- | Wangaratta North       | Reedy Creek        | Murray      | G6067     | BOM       | 403209      | 5506                        | 5410                      | -        | 146.34   | -36.15     | 146.25     |
| Australia   | Australia- | -                      | -                  | -           | G6070     | Synthetic | -           | -                           | 15254                     | -        | -        | -36.15     | 144.85     |
| New Zealand | Australia- | Ngaruawahia            | Waikato            | Waikato     | G1509     | GRDC      | 5865300     | 11395                       | 11392                     | -        | 175.14   | -37.65     | 175.15     |
| New Zealand | Australia- | Clyde                  | Clutha             | Clutha      | G1512     | GRDC      | 5868050     | 12018                       | 12248                     | -        | 169.32   | -45.25     | 169.35     |
| New Zealand | Australia- | Balclutha              | Clutha             | Clutha      | G1513     | GRDC      | 5868100     | 20582                       | 16345                     | -        | 169.74   | -46.35     | 169.75     |
| Australia   | Australia- | Mount Nancar           | Daly               | Daly        | G1325     | GRDC      | 5708145     | 47100                       | 46243                     | -        | 130.73   | -13.95     | 130.85     |

| Country   | Continent  | Station Name              | River Name           | River Basin      | GloFAS ID | Provider | Provider ID | Catchment Area Provided km² | Catchment Area GloFAS km² | LAT Prov | LON Prov | LAT GloFAS | LON GloFAS |
|-----------|------------|---------------------------|----------------------|------------------|-----------|----------|-------------|-----------------------------|---------------------------|----------|----------|------------|------------|
| Australia | Australia- | Red Rock                  | Roper                | Roper            | G1333     | BOM      | 9030250     | 43476                       | 43219                     | -        | 134.41   | -14.65     | 134.45     |
| Australia | Australia- | Kalpowar Crossing         | Normanby             | -                | G1337     | GRDC     | 5101071     | 12930                       | 12983                     | -        | 144.21   | -14.85     | 144.15     |
| Australia | Australia- | Coolibah Homestead        | Victoria             | Victoria         | G1347     | GRDC     | 5708110     | 44900                       | 44297                     | -        | 130.96   | -16.85     | 131.25     |
| Australia | Australia- | Tarrara Bar               | Ord                  | Ord              | G1349     | GRDC     | 5608096     | 51028                       | 51268                     | -15.56   | 128.69   | -15.55     | 128.35     |
| Australia | Australia- | Victoria Highway          | West Baines          | Victoria         | G1356     | GRDC     | 5708126     | 10204                       | 10100                     | -        | 129.73   | -15.95     | 129.75     |
| Australia | Australia- | Koolatah                  | Mitchell             | Mitchell         | G1358     | GRDC     | 5109200     | 45872                       | 45866                     | -        | 142.37   | -15.75     | 142.15     |
| Australia | Australia- | Borrooloola Crossing      | Macarthur            | Macarthur        | G1360     | GRDC     | 5709112     | 15700                       | 14940                     | -16.08   | 136.31   | -15.95     | 136.45     |
| Australia | Australia- | M I M Pump                | Macarthur            | Macarthur        | G1365     | GRDC     | 5709110     | 10400                       | 10184                     | -        | 136.08   | -16.45     | 136.05     |
| Australia | Australia- | Old Ord Homestead         | Ord                  | Ord              | G1371     | GRDC     | 5608095     | 19513                       | 19645                     | -        | 128.85   | -17.25     | 128.85     |
| Australia | Australia- | Dimond Gorge              | Fitzroy              | Fitzroy (Western | G1377     | GRDC     | 5608023     | 17152                       | 17221                     | -        | 126.02   | -17.75     | 125.95     |
| Australia | Australia- | Willare                   | Fitzroy              | Fitzroy (Western | G1379     | GRDC     | 5608025     | 91902                       | 92204                     | -17.75   | 123.5    | -17.85     | 123.65     |
| Australia | Australia- | Glenore Weir              | Norman               | Flinders         | G1380     | GRDC     | 5109161     | 39360                       | 38249                     | -        | 141.13   | -17.85     | 141.15     |
| Australia | Australia- | Walkers Bend              | Flinders             | Flinders         | G1383     | GRDC     | 5109151     | 106300                      | 105640                    | -        | 140.85   | -17.65     | 140.75     |
| Australia | Australia- | Rockfields                | Gilbert              | Gilbert          | G1384     | GRDC     | 5109170     | 10987                       | 10816                     | -        | 142.87   | -18.25     | 142.95     |
| Australia | Australia- | Fitzroy Crossing          | Fitzroy              | Fitzroy (Western | G1385     | GRDC     | 5608024     | 46133                       | 46440                     | -        | 125.57   | -18.45     | 125.25     |
| Australia | Australia- | Floraville Homestead      | Leichhardt           | Leichhardt       | G1386     | GRDC     | 5109210     | 23660                       | 23412                     | -        | 139.88   | -18.15     | 139.85     |
| Australia | Australia- | Gregory Downs             | Gregory              | -                | G1390     | GRDC     | 5109110     | 12690                       | 12592                     | -        | 139.25   | -18.85     | 139.05     |
| Australia | Australia- | Home Hill                 | Burdekin             | Burdekin         | G1396     | GRDC     | 5101201     | 129939                      | 125304                    | -        | 147.39   | -19.65     | 147.45     |
| Australia | Australia- | Clare                     | Burdekin             | Burdekin         | G1397     | GRDC     | 5101200     | 129900                      | 125304                    | -        | 147.24   | -19.65     | 147.45     |
| Australia | Australia- | Coolenar Pool             | De Grey              | De Grey          | G1402     | GRDC     | 5607500     | 50007                       | 51283                     | -        | 119.24   | -20.35     | 119.25     |
| Australia | Australia- | Jimbegnyinoo Pool         | Fortescue            | Fortescue        | G1407     | GRDC     | 5607450     | 18371                       | 18340                     | -        | 116.15   | -22.45     | 119.65     |
| Australia | Australia- | Nanutarra                 | Ashburton            | Ashburton        | G1419     | GRDC     | 5607400     | 71387                       | 70749                     | -        | 115.49   | -22.55     | 115.35     |
| Australia | Australia- | The Gap                   | Fitzroy (Queensland) | Fitzroy          | G1421     | GRDC     | 5101301     | 135757                      | 134951                    | -        | 150.10   | -23.55     | 150.65     |
| Australia | Australia- | Nune Mile Bridge          | Gascoyne             | -                | G1432     | GRDC     | 5607200     | 73432                       | 71792                     | -        | 113.76   | -24.85     | 113.65     |
| Australia | Australia- | Walla                     | Burnett              | -                | G1435     | GRDC     | 5101470     | 32455                       | 31430                     | -        | 151.98   | -24.85     | 152.35     |
| Australia | Australia- | Savages Crossing          | Brisbane             | -                | G1448     | GRDC     | 5101500     | 10170                       | 9959                      | -27.44   | 152.66   | -27.55     | 152.75     |
| Australia | Australia- | Cullyamurra Water Hole    | Cooper Creek         | Eyre Lake        | G1451     | BOM      | 30501       | 230000                      | 229972                    | -        | 140.84   | -28.45     | 138.95     |
| Australia | Australia- | Emu Springs               | Murchison            | Murchison        | G1452     | GRDC     | 5607100     | 86777                       | 61922                     | -        | 114.54   | -27.65     | 114.15     |
| Australia | Australia- | Caiwarro                  | Paroo River          | Murray           | G1456     | BOM      | 424002      | 21446                       | 23109                     | -        | 144.78   | -29.25     | 144.45     |
| Australia | Australia- | Brenda                    | Culgoa               | Murray           | G1458     | GRDC     | 5204460     | -                           | 78826                     | -        | 147.30   | -29.05     | 147.35     |
| Australia | Australia- | Mogil Mogil               | Barwon               | Murray           | G1462     | GRDC     | 5204452     | 64800                       | 61181                     | -        | 148.68   | -29.35     | 148.65     |
| Australia | Australia- | Yarraman Bridge           | Gwydir               | Murray           | G1463     | GRDC     | 5204181     | 12960                       | 12936                     | -        | 149.84   | -29.25     | 149.25     |
| Australia | Australia- | Lilydale Newbold Crossing | Clarence             | -                | G1464     | GRDC     | 5202044     | 16690                       | 16342                     | -        | 152.68   | -29.55     | 152.75     |
| Australia | Australia- | Brewarrina                | Barwon               | Murray           | G1467     | GRDC     | 5204450     | 297850                      | 196926                    | -        | 146.86   | -29.95     | 146.45     |
| Australia | Australia- | Dangar Bridge Walgett     | Barwon               | Murray           | G1468     | GRDC     | 5204451     | 132200                      | 125565                    | -        | 148.06   | -30.05     | 147.65     |
| Australia | Australia- | Bourke Town               | Darling              | Murray           | G1470     | GRDC     | 5204255     | 386000                      | 381294                    | -        | 145.93   | -30.35     | 145.55     |
| Australia | Australia- | Louth                     | Darling              | Murray           | G1474     | GRDC     | 5204250     | 489300                      | 435628                    | -        | 145.11   | -30.55     | 145.05     |
| Australia | Australia- | Menindee U S Weir 32      | Darling              | Murray           | G1482     | GRDC     | 5204252     | 575000                      | 459468                    | -        | 142.37   | -32.65     | 142.35     |
| Australia | Australia- | Singleton                 | Hunter               | -                | G1484     | GRDC     | 5202103     | 16400                       | 16237                     | -        | 151.17   | -32.65     | 151.45     |



| Country   | Continent  | Station Name          | River Name     | River Basin      | GloFAS ID | Provider  | Provider ID | Catchment Area Provided km² | Catchment Area GloFAS km² | LAT Prov | LON Prov | LAT GloFAS | LON GloFAS |
|-----------|------------|-----------------------|----------------|------------------|-----------|-----------|-------------|-----------------------------|---------------------------|----------|----------|------------|------------|
| Australia | Australia- | D S Burrendong Dam    | Macquarie      | Murray           | G1485     | GRDC      | 5204401     | 13980                       | 14046                     | -        | 149.08   | -32.65     | 148.95     |
| Australia | Australia- | Greta                 | Hunter         | -                | G1486     | GRDC      | 5202102     | 17320                       | 17570                     | -        | 151.40   | -32.75     | 151.55     |
| Australia | Australia- | Wycot                 | Great Darling  | Murray           | G1487     | GRDC      | 5204253     | -                           | 6029                      | -        | 142.05   | -32.95     | 142.05     |
| Australia | Australia- | Forbes Cottons Weir   | Lachlan        | Murray           | G1492     | GRDC      | 5204301     | 19000                       | 19628                     | -        | 147.99   | -33.45     | 147.75     |
| Australia | Australia- | Burtundy              | Darling        | Murray           | G1494     | GRDC      | 5204251     | 647200                      | 463121                    | -        | 142.26   | -34.05     | 141.85     |
| Australia | Australia- | Penrith               | Nepean         | -                | G1495     | GRDC      | 5202135     | 11000                       | 10964                     | -        | 150.68   | -33.65     | 150.65     |
| Australia | Australia- | Booligal              | Lachlan        | Murray           | G1497     | GRDC      | 5204300     | 55900                       | 55898                     | -        | 144.88   | -34.05     | 144.65     |
| Australia | Australia- | Darradup              | Blackwood      | Blackwood        | G1498     | GRDC      | 5606100     | 11593                       | 12730                     | -        | 115.61   | -33.55     | 116.85     |
| Australia | Australia- | Overland Corner 417 5 | Murray         | Murray           | G1499     | GRDC      | 5404270     | 1000001                     | 704854                    | -        | 140.27   | -34.15     | 140.25     |
| Australia | Australia- | Lock 1 Downstream     | Murray         | Murray           | G1500     | GRDC      | 5404271     | -                           | 713793                    | -        | 139.61   | -34.35     | 139.65     |
| Australia | Australia- | D S Maude Weir        | Murrumbidgee   | Murray           | G1502     | GRDC      | 5204101     | 57700                       | 35746                     | -        | 144.30   | -34.35     | 144.05     |
| Australia | Australia- | D S Balranald Weir    | Murrumbidgee   | Murray           | G1503     | GRDC      | 5204106     | 166000                      | 121611                    | -        | 143.49   | -34.65     | 143.25     |
| Australia | Australia- | Narrandera            | Murrumbidgee   | Murray           | G1504     | GRDC      | 5204102     | 34200                       | 34188                     | -        | 146.54   | -34.55     | 144.75     |
| Australia | Australia- | Below Wakool Junction | Murray         | Murray           | G1506     | GRDC      | 5304140     | -                           | 100516                    | -        | 143.34   | -34.85     | 143.35     |
| Australia | Australia- | D S Burrinjuck Dam    | Murrumbidgee   | Murray           | G1507     | GRDC      | 5204104     | 13100                       | 14003                     | -        | 148.57   | -34.85     | 148.35     |
| Australia | Australia- | Gundagai              | Murrumbidgee   | Murray           | G1508     | GRDC      | 5204103     | 21100                       | 21218                     | -        | 148.10   | -35.05     | 147.75     |
| Australia | Australia- | Jarrahmond            | Snowy          | -                | G1510     | GRDC      | 5302229     | 13421                       | 12446                     | -        | 148.36   | -37.75     | 148.45     |
| Australia | Australia- | Dartmoor              | Glenelg        | -                | G1511     | GRDC      | 5302400     | 11914                       | 11890                     | -        | 141.28   | -38.05     | 140.95     |
| Australia | Australia- | -                     | Fitzroy        | Fitzroy (Western | G1708     | DFO       | 15          | -                           | 45639                     | -        | 125.41   | -18.35     | 125.45     |
| Australia | Australia- | -                     | Flinders       | Flinders         | G1736     | DFO       | 99          | -                           | 40182                     | -        | 140.80   | -19.35     | 140.75     |
| Australia | Australia- | -                     | Flinders       | Flinders         | G1737     | DFO       | 100         | -                           | 18080                     | -        | 141.16   | -20.15     | 141.15     |
| Australia | Australia- | -                     | Leichhardt     | Leichhardt       | G1738     | DFO       | 103         | -                           | 19306                     | -        | 139.81   | -18.75     | 139.75     |
| Australia | Australia- | -                     | Georgina       | Eyre Lake        | G1739     | DFO       | 104         | -                           | 177810                    | -        | 139.81   | -23.55     | 139.75     |
| Australia | Australia- | -                     | Diamantina     | Eyre Lake        | G1740     | DFO       | 105         | -                           | 54139                     | -        | 141.07   | -23.75     | 141.05     |
| Australia | Australia- | -                     | Thomson        | Eyre Lake        | G1741     | DFO       | 106         | -                           | 64606                     | -        | 143.77   | -23.75     | 143.75     |
| Australia | Australia- | -                     | Cooper Creek   | Eyre Lake        | G1742     | DFO       | 107         | -                           | 142471                    | -        | 142.69   | -25.55     | 142.65     |
| Australia | Australia- | -                     | Murrumbidgee   | Murray           | G1971     | DFO       | 2379        | -                           | 31626                     | -        | 146.47   | -34.75     | 146.45     |
| Australia | Australia- | -                     | Darling        | Murray           | G1978     | DFO       | 10509       | -                           | 460416                    | -        | 142.36   | -33.05     | 142.35     |
| Australia | Australia- | -                     | -              | -                | G5663     | Synthetic | -           | -                           | 12965                     | -        | -        | -14.85     | 134.55     |
| Australia | Australia- | -                     | -              | -                | G5671     | Synthetic | -           | -                           | 81289                     | -        | -        | -15.35     | 130.25     |
| Australia | Australia- | -                     | -              | -                | G5672     | Synthetic | -           | -                           | 14033                     | -        | -        | -15.35     | 142.05     |
| Australia | Australia- | -                     | -              | -                | G5679     | Synthetic | -           | -                           | 15343                     | -        | -        | -15.55     | 130.05     |
| Australia | Australia- | Trimbles Crossing     | Walsh River    | Mitchell         | G5700     | BOM       | 919309      | 8638                        | 9015                      | -        | 143.78   | -16.65     | 143.85     |
| Australia | Australia- | O K Bridge            | Mitchell River | Mitchell         | G5704     | BOM       | 919003      | 7734                        | 7421                      | -        | 144.28   | -16.55     | 144.35     |
| Australia | Australia- | -                     | -              | -                | G5730     | Synthetic | -           | -                           | 28160                     | -        | -        | -17.55     | 141.05     |
| Australia | Australia- | -                     | -              | -                | G5744     | Synthetic | -           | -                           | 24502                     | -        | -        | -17.95     | 139.15     |
| Australia | Australia- | -                     | -              | -                | G5749     | Synthetic | -           | -                           | 21360                     | -        | -        | -18.05     | 125.75     |
| Australia | Australia- | -                     | -              | -                | G5750     | Synthetic | -           | -                           | 17846                     | -        | -        | -18.05     | 139.15     |
| Australia | Australia- | -                     | -              | -                | G5767     | Synthetic | -           | -                           | 44831                     | -        | -        | -18.65     | 140.65     |



| Country   | Continent  | Station Name   | River Name      | River Basin | GloFAS ID | Provider  | Provider ID | Catchment Area Provided km² | Catchment Area GloFAS km² | LAT Prov | LON Prov | LAT GloFAS | LON GloFAS |
|-----------|------------|----------------|-----------------|-------------|-----------|-----------|-------------|-----------------------------|---------------------------|----------|----------|------------|------------|
| Australia | Australia- | -              | -               | -           | G5768     | Synthetic | -           | -                           | 54774                     | -        | -        | -18.65     | 140.75     |
| Australia | Australia- | Railway Bridge | Katherine River | Daly        | G5776     | BOM       | 8140001     | 8357                        | 8153                      | -        | 132.25   | -14.35     | 132.35     |
| Australia | Australia- | -              | -               | -           | G5777     | Synthetic | -           | -                           | 34612                     | -        | -        | -18.95     | 135.65     |
| Australia | Australia- | -              | -               | -           | G5788     | Synthetic | -           | -                           | 25197                     | -        | -        | -19.45     | 133.35     |
| Australia | Australia- | -              | -               | -           | G5789     | Synthetic | -           | -                           | 33294                     | -        | -        | -19.55     | 127.65     |
| Australia | Australia- | -              | -               | -           | G5792     | Synthetic | -           | -                           | 14241                     | -        | -        | -19.65     | 127.75     |
| Australia | Australia- | -              | -               | -           | G5793     | Synthetic | -           | -                           | 26139                     | -        | -        | -19.65     | 133.45     |
| Australia | Australia- | -              | -               | -           | G5803     | Synthetic | -           | -                           | 32891                     | -        | -        | -20.15     | 141.85     |
| Australia | Australia- | -              | -               | -           | G5806     | Synthetic | -           | -                           | 11268                     | -        | -        | -20.25     | 141.75     |
| Australia | Australia- | -              | -               | -           | G5812     | Synthetic | -           | -                           | 16343                     | -        | -        | -20.55     | 137.65     |
| Australia | Australia- | -              | -               | -           | G5813     | Synthetic | -           | -                           | 13639                     | -        | -        | -20.55     | 137.75     |
| Australia | Australia- | Abergowrie     | Herbert River   | -           | G5814     | BOM       | 116006      | 7487                        | 7456                      | -        | 145.93   | -18.45     | 145.95     |
| Australia | Australia- | -              | -               | -           | G5819     | Synthetic | -           | -                           | 71197                     | -        | -        | -20.65     | 146.95     |
| Australia | Australia- | -              | -               | -           | G5822     | Synthetic | -           | -                           | 30430                     | -        | -        | -20.75     | 137.75     |
| Australia | Australia- | -              | -               | -           | G5828     | Synthetic | -           | -                           | 13935                     | -        | -        | -20.85     | 137.65     |
| Australia | Australia- | -              | -               | -           | G5829     | Synthetic | -           | -                           | 19358                     | -        | -        | -20.85     | 146.75     |
| Australia | Australia- | -              | -               | -           | G5836     | Synthetic | -           | -                           | 49858                     | -        | -        | -20.95     | 137.85     |
| Australia | Australia- | -              | -               | -           | G5837     | Synthetic | -           | -                           | 49826                     | -        | -        | -20.95     | 146.85     |
| Australia | Australia- | -              | -               | -           | G5844     | Synthetic | -           | -                           | 31920                     | -        | -        | -21.15     | 137.85     |
| Australia | Australia- | -              | -               | -           | G5849     | Synthetic | -           | -                           | 33960                     | -        | -        | -21.55     | 146.85     |
| Australia | Australia- | -              | -               | -           | G5866     | Synthetic | -           | -                           | 13048                     | -        | -        | -22.55     | 128.85     |
| Australia | Australia- | -              | -               | -           | G5867     | Synthetic | -           | -                           | 24777                     | -        | -        | -22.55     | 128.95     |
| Australia | Australia- | -              | -               | -           | G5875     | Synthetic | -           | -                           | 23890                     | -        | -        | -22.85     | 138.75     |
| Australia | Australia- | -              | -               | -           | G5876     | Synthetic | -           | -                           | 114201                    | -        | -        | -22.85     | 138.85     |
| Australia | Australia- | -              | -               | -           | G5877     | Synthetic | -           | -                           | 21739                     | -        | -        | -22.85     | 149.25     |
| Australia | Australia- | -              | -               | -           | G5881     | Synthetic | -           | -                           | 50282                     | -        | -        | -22.95     | 149.25     |
| Australia | Australia- | -              | -               | -           | G5884     | Synthetic | -           | -                           | 146305                    | -        | -        | -23.15     | 139.55     |
| Australia | Australia- | -              | -               | -           | G5885     | Synthetic | -           | -                           | 16575                     | -        | -        | -23.15     | 139.65     |
| Australia | Australia- | -              | -               | -           | G5889     | Synthetic | -           | -                           | 17901                     | -        | -        | -23.35     | 122.65     |
| Australia | Australia- | -              | -               | -           | G5890     | Synthetic | -           | -                           | 25095                     | -        | -        | -23.35     | 122.75     |
| Australia | Australia- | -              | -               | -           | G5891     | Synthetic | -           | -                           | 16054                     | -        | -        | -23.55     | 148.15     |
| Australia | Australia- | -              | -               | -           | G5893     | Synthetic | -           | -                           | 77247                     | -        | -        | -23.55     | 149.75     |
| Australia | Australia- | -              | -               | -           | G5895     | Synthetic | -           | -                           | 15794                     | -        | -        | -23.65     | 148.55     |
| Australia | Australia- | -              | -               | -           | G5896     | Synthetic | -           | -                           | 46921                     | -        | -        | -23.75     | 149.75     |
| Australia | Australia- | -              | -               | -           | G5901     | Synthetic | -           | -                           | 12588                     | -        | -        | -23.95     | 144.95     |
| Australia | Australia- | -              | -               | -           | G5904     | Synthetic | -           | -                           | 16419                     | -        | -        | -24.05     | 144.95     |
| Australia | Australia- | -              | -               | -           | G5909     | Synthetic | -           | -                           | 13037                     | -        | -        | -24.85     | 130.95     |
| Australia | Australia- | -              | -               | -           | G5910     | Synthetic | -           | -                           | 20610                     | -        | -        | -24.85     | 138.65     |
| Australia | Australia- | -              | -               | -           | G5912     | Synthetic | -           | -                           | 20582                     | -        | -        | -24.95     | 115.25     |

| Country   | Continent  | Station Name | River Name       | River Basin | GloFAS ID | Provider  | Provider ID | Catchment Area Provided km² | Catchment Area GloFAS km² | LAT Prov | LON Prov | LAT GloFAS | LON GloFAS |
|-----------|------------|--------------|------------------|-------------|-----------|-----------|-------------|-----------------------------|---------------------------|----------|----------|------------|------------|
| Australia | Australia- | -            | -                | -           | G5913     | Synthetic | -           | -                           | 194536                    | -        | -        | -24.95     | 138.65     |
| Australia | Australia- | -            | -                | -           | G5915     | Synthetic | -           | -                           | 45758                     | -        | -        | -25.05     | 115.25     |
| Australia | Australia- | -            | -                | -           | G5916     | Synthetic | -           | -                           | 88626                     | -        | -        | -25.15     | 142.95     |
| Australia | Australia- | -            | -                | -           | G5920     | Synthetic | -           | -                           | 51181                     | -        | -        | -25.25     | 142.95     |
| Australia | Australia- | -            | -                | -           | G5929     | Synthetic | -           | -                           | 73016                     | -        | -        | -25.55     | 140.35     |
| Australia | Australia- | -            | -                | -           | G5932     | Synthetic | -           | -                           | 22356                     | -        | -        | -25.65     | 140.35     |
| Australia | Australia- | -            | -                | -           | G5934     | Synthetic | -           | -                           | 142683                    | -        | -        | -25.75     | 142.45     |
| Australia | Australia- | -            | -                | -           | G5941     | Synthetic | -           | -                           | 16243                     | -        | -        | -26.15     | 122.25     |
| Australia | Australia- | -            | -                | -           | G5948     | Synthetic | -           | -                           | 15336                     | -        | -        | -26.55     | 146.05     |
| Australia | Australia- | -            | -                | -           | G5949     | Synthetic | -           | -                           | 16450                     | -        | -        | -26.55     | 146.15     |
| Australia | Australia- | -            | -                | -           | G5950     | Synthetic | -           | -                           | 18574                     | -        | -        | -26.65     | 127.35     |
| Australia | Australia- | -            | -                | -           | G5951     | Synthetic | -           | -                           | 13416                     | -        | -        | -26.65     | 127.45     |
| Australia | Australia- | -            | -                | -           | G5952     | Synthetic | -           | -                           | 15974                     | -        | -        | -26.65     | 141.75     |
| Australia | Australia- | -            | -                | -           | G5953     | Synthetic | -           | -                           | 165626                    | -        | -        | -26.75     | 141.95     |
| Australia | Australia- | -            | -                | -           | G5957     | Synthetic | -           | -                           | 220351                    | -        | -        | -26.85     | 138.85     |
| Australia | Australia- | Birdsville   | Diamantina River | Eyre Lake   | G5958     | BOM       | 20101       | 119034                      | 110100                    | -        | 139.36   | -26.55     | 139.35     |
| Australia | Australia- | -            | -                | -           | G5961     | Synthetic | -           | -                           | 17503                     | -        | -        | -27.05     | 135.55     |
| Australia | Australia- | -            | -                | -           | G5962     | Synthetic | -           | -                           | 15966                     | -        | -        | -27.15     | 135.45     |
| Australia | Australia- | -            | -                | -           | G5969     | Synthetic | -           | -                           | 192529                    | -        | -        | -27.55     | 141.45     |
| Australia | Australia- | -            | -                | -           | G5972     | Synthetic | -           | -                           | 23769                     | -        | -        | -27.65     | 141.45     |
| Australia | Australia- | -            | -                | -           | G5975     | Synthetic | -           | -                           | 52760                     | -        | -        | -27.75     | 148.75     |
| Australia | Australia- | -            | -                | -           | G5976     | Synthetic | -           | -                           | 18303                     | -        | -        | -27.85     | 148.55     |
| Australia | Australia- | Neales       | Neales           | Eyre Lake   | G5978     | DFO       | -           | -                           | 8352                      | -        | 135.80   | -27.85     | 135.85     |
| Australia | Australia- | -            | -                | -           | G5979     | Synthetic | -           | -                           | 46603                     | -        | -        | -28.15     | 137.15     |
| Australia | Australia- | -            | -                | -           | G5981     | Synthetic | -           | -                           | 78895                     | -        | -        | -28.35     | 137.15     |
| Australia | Australia- | -            | -                | -           | G5982     | Synthetic | -           | -                           | 350201                    | -        | -        | -28.35     | 137.25     |
| Australia | Australia- | -            | -                | -           | G5983     | Synthetic | -           | -                           | 235572                    | -        | -        | -28.35     | 137.35     |
| Australia | Australia- | -            | -                | -           | G5987     | Synthetic | -           | -                           | 262859                    | -        | -        | -28.45     | 137.25     |
| Australia | Australia- | -            | -                | -           | G5989     | Synthetic | -           | -                           | 27084                     | -        | -        | -28.55     | 137.35     |
| Australia | Australia- | -            | -                | -           | G5990     | Synthetic | -           | -                           | 11257                     | -        | -        | -28.55     | 149.45     |
| Australia | Australia- | -            | -                | -           | G5991     | Synthetic | -           | -                           | 22831                     | -        | -        | -28.55     | 149.55     |
| Australia | Australia- | -            | -                | -           | G5994     | Synthetic | -           | -                           | 10694                     | -        | -        | -28.95     | 147.15     |
| Australia | Australia- | -            | -                | -           | G5997     | Synthetic | -           | -                           | 15092                     | -        | -        | -29.05     | 116.35     |
| Australia | Australia- | -            | -                | -           | G5998     | Synthetic | -           | -                           | 14012                     | -        | -        | -29.05     | 137.75     |
| Australia | Australia- | -            | -                | -           | G5999     | Synthetic | -           | -                           | 11954                     | -        | -        | -29.05     | 137.85     |
| Australia | Australia- | -            | -                | -           | G6000     | Synthetic | -           | -                           | 13700                     | -        | -        | -29.05     | 146.85     |
| Australia | Australia- | -            | -                | -           | G6001     | Synthetic | -           | -                           | 10947                     | -        | -        | -29.05     | 146.95     |
| Australia | Australia- | -            | -                | -           | G6002     | Synthetic | -           | -                           | 13598                     | -        | -        | -29.25     | 116.45     |
| Australia | Australia- | -            | -                | -           | G6003     | Synthetic | -           | -                           | 33254                     | -        | -        | -29.25     | 146.75     |

| Country     | Continent  | Station Name           | River Name         | River Basin | GloFAS ID | Provider  | Provider ID | Catchment Area Provided km² | Catchment Area GloFAS km² | LAT Prov | LON Prov | LAT GloFAS | LON GloFAS |
|-------------|------------|------------------------|--------------------|-------------|-----------|-----------|-------------|-----------------------------|---------------------------|----------|----------|------------|------------|
| Australia   | Australia- | -                      | -                  | -           | G6004     | Synthetic | -           | -                           | 90326                     | -        | -        | -29.35     | 146.85     |
| Australia   | Australia- | -                      | -                  | -           | G6013     | Synthetic | -           | -                           | 85208                     | -        | -        | -29.95     | 148.15     |
| Australia   | Australia- | -                      | -                  | -           | G6015     | Synthetic | -           | -                           | 37760                     | -        | -        | -30.05     | 148.15     |
| Australia   | Australia- | -                      | -                  | -           | G6021     | Synthetic | -           | -                           | 34206                     | -        | -        | -30.25     | 147.55     |
| Australia   | Australia- | -                      | -                  | -           | G6022     | Synthetic | -           | -                           | 52165                     | -        | -        | -30.35     | 145.35     |
| Australia   | Australia- | -                      | -                  | -           | G6023     | Synthetic | -           | -                           | 28794                     | -        | -        | -30.45     | 144.05     |
| Australia   | Australia- | -                      | -                  | -           | G6024     | Synthetic | -           | -                           | 11364                     | -        | -        | -30.45     | 144.15     |
| Australia   | Australia- | -                      | -                  | -           | G6027     | Synthetic | -           | -                           | 32609                     | -        | -        | -30.85     | 139.85     |
| Australia   | Australia- | -                      | -                  | -           | G6029     | Synthetic | -           | -                           | 11378                     | -        | -        | -30.95     | 118.25     |
| Australia   | Australia- | -                      | -                  | -           | G6030     | Synthetic | -           | -                           | 14228                     | -        | -        | -30.95     | 139.95     |
| Australia   | Australia- | -                      | -                  | -           | G6032     | Synthetic | -           | -                           | 17794                     | -        | -        | -31.05     | 139.85     |
| Australia   | Australia- | -                      | -                  | -           | G6033     | Synthetic | -           | -                           | 21046                     | -        | -        | -31.15     | 118.25     |
| Australia   | Australia- | -                      | -                  | -           | G6034     | Synthetic | -           | -                           | 14277                     | -        | -        | -31.15     | 137.75     |
| Australia   | Australia- | -                      | -                  | -           | G6035     | Synthetic | -           | -                           | 10360                     | -        | -        | -31.35     | 137.85     |
| Australia   | Australia- | Pine Plantation        | Darkin River       | -           | G6039     | BOM       | 616002      | 642                         | 575                       | -        | 116.29   | -32.05     | 116.35     |
| Australia   | Australia- | -                      | -                  | -           | G6040     | Synthetic | -           | -                           | 41780                     | -        | -        | -31.75     | 117.65     |
| Australia   | Australia- | -                      | -                  | -           | G6041     | Synthetic | -           | -                           | 19230                     | -        | -        | -31.85     | 117.75     |
| Australia   | Australia- | below Lobbs Hole Creek | Murrumbidgee River | Murray      | G6048     | BOM       | -           | 5158                        | 5055                      | -        | 149.10   | -35.45     | 149.05     |
| Australia   | Australia- | -                      | -                  | -           | G6049     | Synthetic | -           | -                           | 13163                     | -        | -        | -33.15     | 146.85     |
| Australia   | Australia- | -                      | -                  | -           | G6056     | Synthetic | -           | -                           | 10498                     | -        | -        | -34.25     | 144.55     |
| Australia   | Australia- | -                      | -                  | -           | G6061     | Synthetic | -           | -                           | 48252                     | -        | -        | -35.45     | 143.85     |
| Australia   | Australia- | -                      | -                  | -           | G6064     | Synthetic | -           | -                           | 14586                     | -        | -        | -35.55     | 143.85     |
| Australia   | Australia- | Wangaratta North       | Reedy Creek        | Murray      | G6067     | BOM       | 403209      | 5506                        | 5410                      | -        | 146.34   | -36.15     | 146.25     |
| Australia   | Australia- | -                      | -                  | -           | G6070     | Synthetic | -           | -                           | 15254                     | -        | -        | -36.15     | 144.85     |
| New Zealand | Australia- | Ngaruawahia            | Waikato            | Waikato     | G1509     | GRDC      | 5865300     | 11395                       | 11392                     | -        | 175.14   | -37.65     | 175.15     |
| New Zealand | Australia- | Clyde                  | Clutha             | Clutha      | G1512     | GRDC      | 5868050     | 12018                       | 12248                     | -        | 169.32   | -45.25     | 169.35     |
| New Zealand | Australia- | Balclutha              | Clutha             | Clutha      | G1513     | GRDC      | 5868100     | 20582                       | 16345                     | -        | 169.74   | -46.35     | 169.75     |

Table 4: GloFAS diagnostic points for Europe.

| Country | Continent | Station Name  | River Name | River Basin | GloFAS ID | Provider  | Provider ID | Catchment Area Provided km² | Catchment Area GloFAS km² | LAT Prov | LON Prov | LAT GloFAS | LON GloFAS |
|---------|-----------|---------------|------------|-------------|-----------|-----------|-------------|-----------------------------|---------------------------|----------|----------|------------|------------|
| Austria | Europe    | Schaerding    | Inn        | Danube      | G0456     | GRDC      | 6243850     | 25664                       | 1424                      | 48.436   | 13.441   | 48.45      | 13.35      |
| Austria | Europe    | Kienstock     | Danube     | Danube      | G0461     | GRDC      | 6242401     | 95970                       | 97262                     | 48.383   | 15.462   | 48.35      | 15.45      |
| Austria | Europe    | Korneuburg    | Danube     | Danube      | G0464     | GRDC      | 6242501     | 101537                      | 103042                    | 48.360   | 16.343   | 48.35      | 16.25      |
| Austria | Europe    | Linz          | Danube     | Danube      | G0465     | GRDC      | 6242100     | 79490                       | 80190                     | 48.31    | 14.3     | 48.35      | 14.05      |
| Austria | Europe    | Wien Nussdorf | Danube     | Danube      | G0467     | GRDC      | 6242500     | 101700                      | 100782                    | 48.25    | 16.3     | 48.35      | 15.75      |
| Belarus | Europe    | -             | -          | -           | G3224     | Synthetic | -           | -                           | 8214                      | -        | -        | 55.55      | 28.05      |

| Country           | Continent | Station Name        | River Name  | River Basin | GloFAS ID | Provider  | Provider ID | Catchment Area Provided km² | Catchment Area GloFAS km² | LAT Prov | LON Prov | LAT GloFAS | LON GloFAS |
|-------------------|-----------|---------------------|-------------|-------------|-----------|-----------|-------------|-----------------------------|---------------------------|----------|----------|------------|------------|
| Belarus           | Europe    | -                   | -           | -           | G3225     | Synthetic | -           | -                           | 44412                     | -        | -        | 55.55      | 28.25      |
| Belarus           | Europe    | -                   | -           | -           | G3378     | Synthetic | -           | -                           | 33219                     | -        | -        | 52.65      | 30.25      |
| Belarus           | Europe    | -                   | -           | -           | G3384     | Synthetic | -           | -                           | 25329                     | -        | -        | 52.55      | 30.15      |
| Belarus           | Europe    | -                   | -           | -           | G3385     | Synthetic | -           | -                           | 28173                     | -        | -        | 52.55      | 31.15      |
| Belarus           | Europe    | -                   | -           | -           | G3390     | Synthetic | -           | -                           | 11071                     | -        | -        | 52.45      | 31.15      |
| Belarus           | Europe    | -                   | -           | -           | G3399     | Synthetic | -           | -                           | 9806                      | -        | -        | 52.25      | 28.75      |
| Belarus           | Europe    | -                   | -           | -           | G3404     | Synthetic | -           | -                           | 21172                     | -        | -        | 52.15      | 26.25      |
| Belarus           | Europe    | -                   | -           | -           | G3405     | Synthetic | -           | -                           | 40680                     | -        | -        | 52.15      | 27.15      |
| Belarus           | Europe    | -                   | -           | -           | G3406     | Synthetic | -           | -                           | 92468                     | -        | -        | 52.15      | 28.75      |
| Belarus           | Europe    | -                   | -           | -           | G3411     | Synthetic | -           | -                           | 12643                     | -        | -        | 52.05      | 26.15      |
| Belarus           | Europe    | -                   | -           | -           | G3412     | Synthetic | -           | -                           | 27682                     | -        | -        | 52.05      | 27.25      |
| Belarus           | Europe    | -                   | -           | -           | G3413     | Synthetic | -           | -                           | 61575                     | -        | -        | 52.05      | 30.75      |
| Belarus           | Europe    | -                   | -           | -           | G3416     | Synthetic | -           | -                           | 13152                     | -        | -        | 51.95      | 26.25      |
| Bosnia and Herzeg | Europe    | -                   | Bosna       | Danube      | G1767     | DFO       | 186         | -                           | 10252                     | 44.954   | 18.225   | 44.95      | 18.15      |
| Bosnia and Herzeg | Europe    | -                   | -           | -           | G3823     | Synthetic | -           | -                           | 10430                     | -        | -        | 44.95      | 18.35      |
| Bulgaria          | Europe    | Novo Selo           | Danube      | Danube      | G0626     | GRDC      | 6842200     | 584900                      | 581449                    | 44.16    | 22.82    | 43.75      | 23.55      |
| Bulgaria          | Europe    | Silistra            | Danube      | Danube      | G0627     | GRDC      | 6842900     | 689700                      | 689619                    | 44.13    | 27.26    | 44.25      | 27.95      |
| Bulgaria          | Europe    | Ruse                | Danube      | Danube      | G0632     | GRDC      | 6842800     | 669900                      | 663848                    | 43.86    | 25.95    | 44.05      | 26.55      |
| Bulgaria          | Europe    | Lom                 | Danube      | Danube      | G0633     | GRDC      | 6842400     | 588860                      | 594315                    | 43.84    | 23.24    | 43.75      | 23.75      |
| Bulgaria          | Europe    | Svistov             | Danube      | Danube      | G0638     | GRDC      | 6842700     | 658340                      | 642775                    | 43.63    | 25.35    | 43.65      | 25.35      |
| Bulgaria          | Europe    | Svilengrad          | Maritsa     | -           | G0679     | GRDC      | 6865600     | 20857                       | 20803                     | 41.766   | 26.2     | 41.75      | 26.15      |
| Bulgaria          | Europe    | Marino Pole         | Struma      | -           | G0686     | GRDC      | 6864050     | 10243                       | 10421                     | 41.416   | 23.35    | 41.45      | 23.25      |
| Bulgaria          | Europe    | -                   | -           | -           | G3863     | Synthetic | -           | -                           | 612517                    | -        | -        | 43.65      | 24.75      |
| Croatia           | Europe    | -                   | Sava        | Danube      | G1766     | DFO       | 167         | -                           | 51708                     | 45.044   | 18.585   | 45.05      | 18.65      |
| Croatia           | Europe    | -                   | -           | -           | G3748     | Synthetic | -           | -                           | 14248                     | -        | -        | 46.35      | 16.75      |
| Croatia           | Europe    | -                   | -           | -           | G3751     | Synthetic | -           | -                           | 17363                     | -        | -        | 46.25      | 16.75      |
| Croatia           | Europe    | -                   | -           | -           | G3788     | Synthetic | -           | -                           | 41671                     | -        | -        | 45.55      | 18.85      |
| Czech Republic    | Europe    | Decin               | Elbe        | Elbe        | G0368     | GRDC      | 6140400     | 51123                       | 52004                     | 50.79    | 14.23    | 50.85      | 14.25      |
| Czech Republic    | Europe    | Usti Nad Labem      | Elbe        | Elbe        | G0374     | GRDC      | 6140401     | 48541                       | 49276                     | 50.656   | 14.043   | 50.55      | 14.15      |
| Czech Republic    | Europe    | Breclav Ladna       | Thaya       | Danube      | G0442     | GRDC      | 6142110     | 12283                       | 12645                     | 48.8     | 16.86    | 48.75      | 16.85      |
| Czech Republic    | Europe    | -                   | -           | -           | G3512     | Synthetic | -           | -                           | 28321                     | -        | -        | 50.35      | 14.35      |
| Czech Republic    | Europe    | -                   | -           | -           | G3524     | Synthetic | -           | -                           | 14242                     | -        | -        | 50.25      | 14.55      |
| Czech Republic    | Europe    | -                   | -           | -           | G3545     | Synthetic | -           | -                           | 8981                      | -        | -        | 49.95      | 14.25      |
| Czech Republic    | Europe    | -                   | -           | -           | G3547     | Synthetic | -           | -                           | 17637                     | -        | -        | 49.85      | 14.35      |
| Estonia           | Europe    | Narva Hep           | Narva Jogi  | Narva       | G0173     | GRDC      | 6972350     | 56000                       | 58317                     | 59.377   | 28.190   | 59.45      | 28.15      |
| Finland           | Europe    | Utsjoki             | Tana        | Tana        | G0009     | GRDC      | 6830510     | 1520                        | 13681                     | 69.92    | 27.02    | 69.45      | 25.15      |
| Finland           | Europe    | Onnelansuvanto      | Tana        | Tana        | G0010     | GRDC      | 6830511     | 10864                       | 10852                     | 69.92    | 27.02    | 69.45      | 24.95      |
| Finland           | Europe    | Lake Inari Outlet   | Paatsjoki   | -           | G0015     | GRDC      | 6830100     | 14575                       | 2810                      | 68.9     | 27.15    | 69.05      | 27.15      |
| Finland           | Europe    | Marraskoski Iisinki | Ounasjoki - | Kemijoki    | G0043     | GRDC      | 6854710     | 12303                       | 3533                      | 66.78    | 25.42    | 66.65      | 25.55      |

| Country | Continent | Station Name            | River Name   | River Basin  | GloFAS ID | Provider  | Provider ID | Catchment Area Provided km <sup>2</sup> | Catchment Area GloFAS km <sup>2</sup> | LAT Prov | LON Prov | LAT GloFAS | LON GloFAS |
|---------|-----------|-------------------------|--------------|--------------|-----------|-----------|-------------|-----------------------------------------|---------------------------------------|----------|----------|------------|------------|
| Finland | Europe    | Seitakorva              | Kemijoki     | Kemijoki     | G0048     | GRDC      | 6854701     | 27424                                   | 32158                                 | 66.47    | 27.35    | 66.45      | 27.35      |
| Finland | Europe    | Isohaara Near The Mouth | Kemijoki     | Kemijoki     | G0057     | GRDC      | 6854700     | 50683                                   | 46933                                 | 65.78    | 24.55    | 65.75      | 24.45      |
| Finland | Europe    | Raasakka Near The       | Iijoki       | Iijoki       | G0065     | GRDC      | 6854600     | 14191                                   | 16979                                 | 65.32    | 25.43    | 65.35      | 25.45      |
| Finland | Europe    | Meriskoski Near The     | Oulujoki     | Oulujoki     | G0071     | GRDC      | 6854500     | 22841                                   | 5420                                  | 65.02    | 25.52    | 64.95      | 25.75      |
| Finland | Europe    | Jylhama Vaala           | Oulujoki     | Oulujoki     | G0080     | GRDC      | 6854591     | 19839                                   | 22136                                 | 64.57    | 26.78    | 64.45      | 26.65      |
| Finland | Europe    | Kaltimo                 | Vuoksi       | Vuoksi       | G0108     | GRDC      | 6855401     | 20816                                   | 21566                                 | 62.78    | 30.13    | 62.85      | 30.25      |
| Finland | Europe    | Kallavesi Konnus Karvio | Vuoksi       | Vuoksi       | G0113     | GRDC      | 6855402     | 16270                                   | 17456                                 | 62.53    | 27.77    | 62.55      | 27.75      |
| Finland | Europe    | Vaajakoski Haapakoski   | Kymijoki     | Kymijoki     | G0118     | GRDC      | 6855250     | 17684                                   | 16693                                 | 62.23    | 25.88    | 62.15      | 25.85      |
| Finland | Europe    | Kalsinkosi              | Kokemaenjoki | Kokemaenjoki | G0133     | GRDC      | 6854100     | 26025                                   | 27480                                 | 61.35    | 22.12    | 61.45      | 21.85      |
| Finland | Europe    | Tainionkoski            | Vuoksi       | Vuoksi       | G0138     | GRDC      | 6855400     | 61061                                   | 65982                                 | 61.22    | 28.78    | 61.05      | 28.45      |
| Finland | Europe    | Harjavalta              | Kokemaenjoki | Kokemaenjoki | G0140     | GRDC      | 6854101     | 26117                                   | 24843                                 | 61.2     | 22.07    | 61.35      | 21.95      |
| Finland | Europe    | Anjala                  | Kymijoki     | Kymijoki     | G0150     | GRDC      | 6855200     | 36275                                   | 27244                                 | 60.7     | 26.82    | 60.65      | 26.15      |
| Finland | Europe    | -                       | -            | -            | G2254     | Synthetic | -           | -                                       | 5219                                  | -        | -        | 67.35      | 28.15      |
| Finland | Europe    | -                       | -            | -            | G2261     | Synthetic | -           | -                                       | 6293                                  | -        | -        | 67.25      | 28.35      |
| Finland | Europe    | -                       | -            | -            | G2279     | Synthetic | -           | -                                       | 7820                                  | -        | -        | 67.05      | 27.45      |
| Finland | Europe    | -                       | -            | -            | G2280     | Synthetic | -           | -                                       | 12909                                 | -        | -        | 67.05      | 27.65      |
| Finland | Europe    | -                       | -            | -            | G2337     | Synthetic | -           | -                                       | 43270                                 | -        | -        | 66.45      | 23.65      |
| Finland | Europe    | -                       | -            | -            | G2346     | Synthetic | -           | -                                       | 15090                                 | -        | -        | 66.35      | 23.75      |
| Finland | Europe    | -                       | -            | -            | G2440     | Synthetic | -           | -                                       | 7058                                  | -        | -        | 65.45      | 25.95      |
| Finland | Europe    | -                       | -            | -            | G2449     | Synthetic | -           | -                                       | 9371                                  | -        | -        | 65.35      | 25.95      |
| Finland | Europe    | -                       | -            | -            | G2546     | Synthetic | -           | -                                       | 10733                                 | -        | -        | 64.35      | 27.45      |
| Finland | Europe    | -                       | -            | -            | G2788     | Synthetic | -           | -                                       | 24856                                 | -        | -        | 61.85      | 28.75      |
| Finland | Europe    | -                       | -            | -            | G2822     | Synthetic | -           | -                                       | 8569                                  | -        | -        | 61.45      | 23.45      |
| Finland | Europe    | -                       | -            | -            | G2831     | Synthetic | -           | -                                       | 8236                                  | -        | -        | 61.35      | 23.45      |
| Finland | Europe    | -                       | -            | -            | G2888     | Synthetic | -           | -                                       | 8233                                  | -        | -        | 60.55      | 26.55      |
| France  | Europe    | Nouatre                 | Vienne       | Loire        | G0518     | GRDC      | 6123400     | 19920                                   | 20690                                 | 47.048   | -        | 47.05      | -0.55      |
| France  | Europe    | Chancy Aux Ripes        | Rhone        | Rhone        | G0554     | GRDC      | 6939050     | 10323                                   | 10534                                 | 46.153   | 5.9707   | 46.15      | 5.95       |
| France  | Europe    | Sault Brenaz            | Rhone        | Rhone        | G0565     | GRDC      | 6139391     | 15380                                   | 15442                                 | 45.86    | 5.4      | 45.75      | 5.45       |
| France  | Europe    | Olmata Di Tuda Lancone  | Bevineo      | -            | G0664     | GRDC      | 6150300     | -                                       | 1203                                  | 42.602   | 9.3794   | 42.55      | 9.35       |
| France  | Europe    | La Durance A Saint Paul | Durance      | Rhone        | G1584     | EFAS/SC   | -           | 11700                                   | 11687                                 | 43.71    | 5.74     | 43.75      | 5.75       |
| France  | Europe    | Le Rhone A Beaucaire    | Rhone        | Rhone        | G1585     | EFAS/Ba   | -           | 95590                                   | 95189                                 | 43.8     | 4.65     | 43.95      | 4.75       |
| France  | Europe    | La Garonne A Verdun Sur | Garonne      | Garonne      | G1586     | EFAS/SC   | -           | 13730                                   | 14370                                 | 43.83    | 1.25     | 43.85      | 1.25       |
| France  | Europe    | La Garonne A Tonneins   | Garonne      | Garonne      | G1587     | EFAS/Ba   | -           | 51500                                   | 50483                                 | 44.4     | -0.28    | 44.35      | -0.25      |
| France  | Europe    | Le Rhone A Viviers      | Rhone        | Rhone        | G1588     | EFAS/Ba   | -           | 70900                                   | 71619                                 | 44.48    | 4.7      | 44.55      | 4.75       |
| France  | Europe    | L Isere A Beaumont      | Isere        | Rhone        | G1589     | EFAS/Ba   | -           | 11800                                   | 12220                                 | 45.03    | 4.96     | 45.05      | 4.95       |
| France  | Europe    | La Saone A Couzon Au    | Rhone        | Rhone        | G1590     | EFAS/SC   | -           | 29908                                   | 29586                                 | 45.79    | 4.84     | 45.85      | 4.85       |
| France  | Europe    | Le Rhone A Lyon         | Rhone        | Rhone        | G1591     | EFAS/Ba   | -           | 20300                                   | 20322                                 | 45.79    | 4.91     | 45.85      | 5.05       |
| France  | Europe    | L Allier A Moulins      | Allier       | Loire        | G1592     | EFAS/Ba   | -           | 12980                                   | 13108                                 | 46.58    | 3.34     | 46.45      | 3.35       |
| France  | Europe    | La Loire A Nevers       | Loire        | Loire        | G1593     | EFAS/Ba   | -           | 17570                                   | 18634                                 | 46.98    | 3.17     | 46.95      | 3.15       |

| Country | Continent | Station Name              | River Name   | River Basin | GloFAS ID | Provider  | Provider ID | Catchment Area Provided km² | Catchment Area GloFAS km² | LAT Prov | LON Prov | LAT GloFAS | LON GloFAS |
|---------|-----------|---------------------------|--------------|-------------|-----------|-----------|-------------|-----------------------------|---------------------------|----------|----------|------------|------------|
| France  | Europe    | La Saone A Pagny La Ville | Saone        | Rhone       | G1594     | EFAS/Ba   | -           | 11673                       | 11477                     | 47.07    | 5.15     | 47.05      | 5.15       |
| France  | Europe    | La Loire Totale A Nantes  | Loire        | Loire       | G1595     | EFAS/Ba   | -           | 111570                      | 114442                    | 47.21    | -1.54    | 47.25      | -1.45      |
| France  | Europe    | La Loire A Saumur         | Loire        | Loire       | G1596     | EFAS/Ba   | -           | 81200                       | 83037                     | 47.26    | -0.01    | 47.25      | -0.05      |
| France  | Europe    | La Loire A Blois          | Loire        | Loire       | G1597     | EFAS/Ba   | -           | 38320                       | 39421                     | 47.59    | 1.34     | 47.55      | 1.35       |
| France  | Europe    | L Yonne A Courlon Sur     | Yonne        | Seine       | G1598     | EFAS/Ba   | -           | 10700                       | 10942                     | 48.32    | 3.15     | 48.35      | 3.15       |
| France  | Europe    | La Marne A Gournay Sur    | Marne        | Seine       | G1599     | EFAS/Ba   | -           | 12660                       | 12908                     | 48.86    | 2.57     | 48.85      | 2.55       |
| France  | Europe    | La Seine A Poissy         | Seine        | Seine       | G1600     | EFAS/Ba   | -           | 61820                       | 62939                     | 48.94    | 2.05     | 48.95      | 2.05       |
| France  | Europe    | La Meuse A Chooz Ile      | Meuse - Mosa | Rhine       | G1601     | EFAS/Ba   | -           | 10120                       | 10950                     | 50.11    | 4.83     | 50.15      | 4.85       |
| France  | Europe    | -                         | -            | -           | G3694     | Synthetic | -           | -                           | 22752                     | -        | -        | 47.45      | -0.65      |
| France  | Europe    | -                         | -            | -           | G3695     | Synthetic | -           | -                           | 88528                     | -        | -        | 47.45      | -0.55      |
| France  | Europe    | -                         | -            | -           | G3699     | Synthetic | -           | -                           | 13941                     | -        | -        | 47.35      | 1.05       |
| France  | Europe    | -                         | -            | -           | G3716     | Synthetic | -           | -                           | 10542                     | -        | -        | 46.85      | -0.55      |
| France  | Europe    | -                         | -            | -           | G3851     | Synthetic | -           | -                           | 14315                     | -        | -        | 43.85      | 4.95       |
| Germany | Europe    | Neu Darchau               | Elbe         | Elbe        | G0292     | GRDC      | 6340110     | 131950                      | 134031                    | 53.232   | 10.889   | 53.25      | 10.85      |
| Germany | Europe    | Wittenberge               | Elbe         | Elbe        | G0297     | GRDC      | 6340150     | 123532                      | 124112                    | 52.99    | 11.752   | 52.95      | 11.85      |
| Germany | Europe    | Intschede                 | Weser        | Weser       | G0298     | GRDC      | 6337200     | 37720                       | 39295                     | 52.964   | 9.125    | 52.95      | 9.15       |
| Germany | Europe    | Hohensaaten Finow Ap      | Oder         | Oder        | G0301     | GRDC      | 6357010     | 109564                      | 112648                    | 52.864   | 14.142   | 52.75      | 14.25      |
| Germany | Europe    | Doerverden                | Weser        | Weser       | G0304     | GRDC      | 6337515     | 22110                       | 22064                     | 52.852   | 9.211    | 52.55      | 9.15       |
| Germany | Europe    | Rethem                    | Aller        | Weser       | G0306     | GRDC      | 6337250     | 14730                       | 16002                     | 52.789   | 9.383    | 52.75      | 9.35       |
| Germany | Europe    | Rathenow Hauptschleuse    | Havel        | Elbe        | G0309     | GRDC      | 6340501     | 19288                       | 18960                     | 52.605   | 12.317   | 52.55      | 12.35      |
| Germany | Europe    | Rathenow Hauptschleuse    | Havel        | Elbe        | G0310     | GRDC      | 6340500     | 19246                       | 18960                     | 52.6     | 12.33    | 52.55      | 12.35      |
| Germany | Europe    | Liebenau                  | Weser        | Weser       | G0311     | GRDC      | 6337517     | 19910                       | 19978                     | 52.594   | 9.113    | 52.35      | 8.95       |
| Germany | Europe    | Tangermuende              | Elbe         | Elbe        | G0313     | GRDC      | 6340160     | 97780                       | 99630                     | 52.55    | 11.98    | 52.55      | 11.95      |
| Germany | Europe    | Ketzin                    | Havel        | Elbe        | G0316     | GRDC      | 6340510     | 16173                       | 16012                     | 52.483   | 12.85    | 52.45      | 12.85      |
| Germany | Europe    | Porta                     | Weser        | Weser       | G0320     | GRDC      | 6337518     | 19162                       | 19590                     | 52.249   | 8.922    | 52.25      | 8.95       |
| Germany | Europe    | Vlotho                    | Weser        | Weser       | G0321     | GRDC      | 6337100     | 17618                       | 17643                     | 52.176   | 8.862    | 52.15      | 8.95       |
| Germany | Europe    | Eisenhuettenstadt         | Oder         | Oder        | G0323     | GRDC      | 6357500     | 52033                       | 52007                     | 52.153   | 14.688   | 52.15      | 14.65      |
| Germany | Europe    | Magdeburg Strombruecke    | Elbe         | Elbe        | G0325     | GRDC      | 6340180     | 94942                       | 96838                     | 52.135   | 11.644   | 52.05      | 11.75      |
| Germany | Europe    | Barby                     | Elbe         | Elbe        | G0329     | GRDC      | 6340140     | 94060                       | 96838                     | 51.991   | 11.883   | 52.05      | 11.75      |
| Germany | Europe    | Bodenwerder               | Weser        | Weser       | G0330     | GRDC      | 6337514     | 15924                       | 16003                     | 51.973   | 9.516    | 51.85      | 9.45       |
| Germany | Europe    | Calbe Grizehne            | Saale        | Elbe        | G0331     | GRDC      | 6340300     | 23719                       | 23992                     | 51.9     | 11.75    | 51.95      | 11.85      |
| Germany | Europe    | Aken                      | Elbe         | Elbe        | G0332     | GRDC      | 6340170     | 70093                       | 71597                     | 51.863   | 12.059   | 51.85      | 12.05      |
| Germany | Europe    | Wittenberg                | Elbe         | Elbe        | G0333     | GRDC      | 6340130     | 61879                       | 62609                     | 51.862   | 12.647   | 51.85      | 12.65      |
| Germany | Europe    | Rees                      | Rhine        | Rhine       | G0340     | GRDC      | 6335020     | 159300                      | 162845                    | 51.75    | 6.4      | 51.75      | 6.45       |
| Germany | Europe    | Karlshafen                | Weser        | Weser       | G0345     | GRDC      | 6337516     | 14794                       | 15061                     | 51.648   | 9.438    | 51.65      | 9.45       |
| Germany | Europe    | Wahmbeck                  | Weser        | Weser       | G0346     | GRDC      | 6337519     | 12996                       | 12851                     | 51.625   | 9.52     | 51.55      | 9.55       |
| Germany | Europe    | Torgau 1                  | Elbe         | Elbe        | G0348     | GRDC      | 6340190     | 55211                       | 56062                     | 51.559   | 13.011   | 51.55      | 13.05      |
| Germany | Europe    | Halle Trotha              | Saale        | Elbe        | G0349     | GRDC      | 6340301     | 17979                       | 18027                     | 51.521   | 11.953   | 51.45      | 11.95      |
| Germany | Europe    | Hann Muenden              | Weser        | Weser       | G0353     | GRDC      | 6337400     | 12442                       | 12694                     | 51.426   | 9.641    | 51.45      | 9.65       |

| Country | Continent | Station Name           | River Name | River Basin | GloFAS ID | Provider  | Provider ID | Catchment Area Provided km² | Catchment Area GloFAS km² | LAT Prov | LON Prov | LAT GloFAS | LON GloFAS |
|---------|-----------|------------------------|------------|-------------|-----------|-----------|-------------|-----------------------------|---------------------------|----------|----------|------------|------------|
| Germany | Europe    | Duesseldorf            | Rhine      | Rhine       | G0355     | GRDC      | 6335050     | 147680                      | 149561                    | 51.226   | 6.77     | 51.15      | 6.85       |
| Germany | Europe    | Dresden                | Elbe       | Elbe        | G0356     | GRDC      | 6340120     | 53096                       | 53521                     | 51.06    | 13.739   | 50.95      | 13.85      |
| Germany | Europe    | Koeln                  | Rhine      | Rhine       | G0358     | GRDC      | 6335060     | 144232                      | 147971                    | 50.937   | 6.963    | 50.95      | 6.95       |
| Germany | Europe    | Andernach              | Rhine      | Rhine       | G0380     | GRDC      | 6335070     | 139549                      | 141636                    | 50.443   | 7.392    | 50.45      | 7.55       |
| Germany | Europe    | Cochem                 | Moselle    | Rhine       | G0386     | GRDC      | 6336050     | 27088                       | 27566                     | 50.143   | 7.168    | 50.15      | 7.15       |
| Germany | Europe    | Frankfurt A M Osthafen | Main       | Rhine       | G0390     | GRDC      | 6335304     | 24764                       | 25423                     | 50.106   | 8.667    | 50.15      | 8.85       |
| Germany | Europe    | Kaub                   | Rhine      | Rhine       | G0391     | GRDC      | 6335100     | 103488                      | 106102                    | 50.086   | 7.765    | 50.05      | 7.75       |
| Germany | Europe    | Schweinfurt            | Main       | Rhine       | G0394     | GRDC      | 6335301     | 12715                       | 12892                     | 50.031   | 10.221   | 50.05      | 10.25      |
| Germany | Europe    | Steinbach              | Main       | Rhine       | G0395     | GRDC      | 6335302     | 17914                       | 18489                     | 50.01    | 9.604    | 50.05      | 9.65       |
| Germany | Europe    | Mainz                  | Rhine      | Rhine       | G0396     | GRDC      | 6335150     | 98206                       | 100957                    | 50.005   | 8.275    | 50.05      | 8.25       |
| Germany | Europe    | Trunstadt              | Main       | Rhine       | G0399     | GRDC      | 6335303     | 12010                       | 12161                     | 49.93    | 10.755   | 49.95      | 10.75      |
| Germany | Europe    | Wuerzburg              | Main       | Rhine       | G0405     | GRDC      | 6335500     | 14031                       | 14279                     | 49.796   | 9.926    | 49.75      | 9.95       |
| Germany | Europe    | Trier Up               | Moselle    | Rhine       | G0411     | GRDC      | 6336500     | 23857                       | 23988                     | 49.733   | 6.624    | 49.65      | 6.55       |
| Germany | Europe    | Kleinheubach           | Main       | Rhine       | G0412     | GRDC      | 6335240     | 21505                       | 21680                     | 49.716   | 9.225    | 49.75      | 9.35       |
| Germany | Europe    | Worms                  | Rhine      | Rhine       | G0416     | GRDC      | 6335180     | 68827                       | 70010                     | 49.632   | 8.377    | 49.55      | 8.45       |
| Germany | Europe    | Perl                   | Moselle    | Rhine       | G0422     | GRDC      | 6336800     | 11522                       | 11670                     | 49.473   | 6.369    | 49.45      | 6.35       |
| Germany | Europe    | Rockenau Ska           | Neckar     | Rhine       | G0423     | GRDC      | 6335600     | 12710                       | 13049                     | 49.432   | 9.004    | 49.35      | 9.05       |
| Germany | Europe    | Speyer                 | Rhine      | Rhine       | G0426     | GRDC      | 6335170     | 53131                       | 53505                     | 49.324   | 8.449    | 49.25      | 8.45       |
| Germany | Europe    | Maxau                  | Rhine      | Rhine       | G0428     | GRDC      | 6335200     | 50196                       | 51936                     | 49.039   | 8.306    | 49.05      | 8.35       |
| Germany | Europe    | Regensburg             | Danube     | Danube      | G0429     | GRDC      | 6342600     | 35399                       | 35787                     | 49.018   | 12.144   | 49.05      | 12.15      |
| Germany | Europe    | Oberndorf              | Danube     | Danube      | G0436     | GRDC      | 6342910     | 26448                       | 26577                     | 48.947   | 12.015   | 48.95      | 12.05      |
| Germany | Europe    | Pfelling               | Danube     | Danube      | G0439     | GRDC      | 6342920     | 37687                       | 38279                     | 48.88    | 12.747   | 48.85      | 12.75      |
| Germany | Europe    | Ingolstadt             | Danube     | Danube      | G0444     | GRDC      | 6342500     | 20001                       | 20848                     | 48.754   | 11.422   | 48.75      | 11.45      |
| Germany | Europe    | Hofkirchen             | Danube     | Danube      | G0445     | GRDC      | 6342800     | 47496                       | 49065                     | 48.676   | 13.116   | 48.75      | 13.05      |
| Germany | Europe    | Achleiten              | Danube     | Danube      | G0450     | GRDC      | 6342900     | 76653                       | 77930                     | 48.582   | 13.504   | 48.55      | 13.55      |
| Germany | Europe    | Passau Ingling         | Inn        | Danube      | G0454     | GRDC      | 6343900     | 26084                       | 26199                     | 48.562   | 13.443   | 48.45      | 13.45      |
| Germany | Europe    | Wasserburg             | Inn        | Danube      | G0475     | GRDC      | 6343100     | 11983                       | 11892                     | 48.059   | 12.233   | 48.05      | 12.25      |
| Germany | Europe    | Lenggries              | Isar       | Danube      | G0492     | GRDC      | 6342926     | -                           | 1533                      | 47.684   | 11.573   | 47.65      | 11.55      |
| Germany | Europe    | Rheinfelden            | Rhine      | Rhine       | G0500     | GRDC      | 6335400     | 34550                       | 35316                     | 47.561   | 7.799    | 47.55      | 7.75       |
| Germany | Europe    | -                      | -          | -           | G3366     | Synthetic | -           | -                           | 23945                     | -        | -        | 52.85      | 12.05      |
| Germany | Europe    | -                      | -          | -           | G3542     | Synthetic | -           | -                           | 28334                     | -        | -        | 50.05      | 8.45       |
| Germany | Europe    | -                      | -          | -           | G3648     | Synthetic | -           | -                           | 13238                     | -        | -        | 48.25      | 12.85      |
| Germany | Europe    | -                      | -          | -           | G3657     | Synthetic | -           | -                           | 9185                      | -        | -        | 48.15      | 12.85      |
| Hungary | Europe    | Tiszapalkonya          | Tisza      | Danube      | G0484     | GRDC      | 6444310     | 62723                       | 63080                     | 47.883   | 21.066   | 47.95      | 21.15      |
| Hungary | Europe    | Csenger                | Szamos     | Danube      | G0486     | GRDC      | 6444600     | 15283                       | 15998                     | 47.833   | 22.683   | 47.85      | 22.75      |
| Hungary | Europe    | Nagymaros              | Danube     | Danube      | G0489     | GRDC      | 6442500     | 183533                      | 180701                    | 47.78    | 18.95    | 47.85      | 18.75      |
| Hungary | Europe    | Dunaalmas              | Danube     | Danube      | G0491     | GRDC      | 6442450     | 171720                      | 173819                    | 47.73    | 18.33    | 47.75      | 18.15      |
| Hungary | Europe    | Szolnok                | Tisza      | Danube      | G0517     | GRDC      | 6444200     | 75113                       | 74712                     | 47.183   | 20.2     | 47.05      | 20.15      |
| Hungary | Europe    | Szeged                 | Tisza      | Danube      | G0550     | GRDC      | 6444100     | 138408                      | 140777                    | 46.25    | 20.166   | 46.25      | 20.15      |



| Country     | Continent | Station Name    | River Name        | River Basin     | GloFAS ID | Provider  | Provider ID | Catchment Area Provided km² | Catchment Area GloFAS km² | LAT Prov | LON Prov | LAT GloFAS | LON GloFAS |
|-------------|-----------|-----------------|-------------------|-----------------|-----------|-----------|-------------|-----------------------------|---------------------------|----------|----------|------------|------------|
| Hungary     | Europe    | Mako            | Maros             | Danube          | G0551     | GRDC      | 6444110     | 30149                       | 30279                     | 46.216   | 20.483   | 46.15      | 20.55      |
| Hungary     | Europe    | Mohacs          | Danube            | Danube          | G0560     | GRDC      | 6442600     | 209064                      | 207337                    | 46       | 18.67    | 46.35      | 18.85      |
| Hungary     | Europe    | -               | -                 | -               | G3658     | Synthetic | -           | -                           | 39924                     | -        | -        | 48.15      | 21.55      |
| Hungary     | Europe    | -               | -                 | -               | G3678     | Synthetic | -           | -                           | 134502                    | -        | -        | 47.75      | 17.65      |
| Hungary     | Europe    | -               | -                 | -               | G3683     | Synthetic | -           | -                           | 17814                     | -        | -        | 47.65      | 17.65      |
| Hungary     | Europe    | -               | -                 | -               | G3712     | Synthetic | -           | -                           | 12656                     | -        | -        | 46.95      | 21.05      |
| Hungary     | Europe    | -               | -                 | -               | G3717     | Synthetic | -           | -                           | 27661                     | -        | -        | 46.85      | 20.25      |
| Hungary     | Europe    | -               | -                 | -               | G3718     | Synthetic | -           | -                           | 9269                      | -        | -        | 46.85      | 21.05      |
| Italy       | Europe    | Lavello         | Adda              | Po              | G0568     | GRDC      | 6348600     | -                           | 4790                      | 45.783   | 9.4359   | 45.75      | 9.45       |
| Italy       | Europe    | Miorina         | Ticino            | Po              | G0570     | GRDC      | 6348350     | -                           | 6973                      | 45.701   | 8.6507   | 45.65      | 8.65       |
| Italy       | Europe    | Boara Pisani    | Adige             | Po              | G0593     | GRDC      | 6349500     | 11954                       | 12223                     | 45.1     | 11.82    | 45.35      | 11.05      |
| Italy       | Europe    | Piacenza        | Po                | Po              | G0595     | GRDC      | 6348400     | 42030                       | 41505                     | 45.016   | 9.6667   | 45.15      | 9.65       |
| Italy       | Europe    | Boretto         | Po                | Po              | G0604     | GRDC      | 6348500     | 55183                       | 55340                     | 44.9     | 10.55    | 44.95      | 10.25      |
| Italy       | Europe    | Pontelagoscuro  | Po                | Po              | G0606     | GRDC      | 6348800     | 70091                       | 74119                     | 44.883   | 11.6     | 44.85      | 11.65      |
| Italy       | Europe    | -               | Po                | Po              | G1829     | DFO       | 660         | -                           | 57930                     | 44.954   | 10.665   | 44.95      | 10.65      |
| Italy       | Europe    | -               | Po                | Po              | G1830     | DFO       | 661         | -                           | 52928                     | 45.044   | 10.125   | 45.05      | 10.15      |
| Italy       | Europe    | -               | Po                | Po              | G1831     | DFO       | 663         | -                           | 29498                     | 45.134   | 9.225    | 45.05      | 9.05       |
| Italy       | Europe    | -               | Ticino            | Po              | G1832     | DFO       | 665         | -                           | 7766                      | 45.314   | 8.955    | 45.35      | 8.85       |
| Italy       | Europe    | -               | Po                | Po              | G1833     | DFO       | 666         | -                           | 13555                     | 45.134   | 8.415    | 45.15      | 8.35       |
| Italy       | Europe    | -               | Reno              | Po              | G1921     | DFO       | 1958        | -                           | 3677                      | 44.594   | 11.835   | 44.55      | 11.85      |
| Italy       | Europe    | -               | -                 | -               | G3820     | Synthetic | -           | -                           | 17082                     | -        | -        | 45.05      | 8.65       |
| Italy       | Europe    | -               | -                 | -               | G3821     | Synthetic | -           | -                           | 14876                     | -        | -        | 45.05      | 12.05      |
| Italy       | Europe    | -               | -                 | -               | G3822     | Synthetic | -           | -                           | 74475                     | -        | -        | 44.95      | 12.05      |
| Latvia      | Europe    | Daugavpils      | Daugava           | Western Dvina - | G0242     | GRDC      | 6973300     | 64500                       | 65316                     | 55.883   | 26.533   | 55.85      | 26.65      |
| Latvia      | Europe    | -               | -                 | -               | G3161     | Synthetic | -           | -                           | 9734                      | -        | -        | 56.65      | 25.75      |
| Latvia      | Europe    | -               | -                 | -               | G3164     | Synthetic | -           | -                           | 72148                     | -        | -        | 56.55      | 25.75      |
| Lithuania   | Europe    | Jonava          | Neris             | Neman           | G0260     | GRDC      | 6974350     | 24500                       | 25574                     | 55.083   | 24.283   | 55.05      | 24.25      |
| Lithuania   | Europe    | Smalininkai     | Nemunas - Neman   | Neman           | G0261     | GRDC      | 6974150     | 81200                       | 84732                     | 55.075   | 22.579   | 55.05      | 22.55      |
| Lithuania   | Europe    | -               | -                 | -               | G3266     | Synthetic | -           | -                           | 72852                     | -        | -        | 54.85      | 23.85      |
| Lithuania   | Europe    | -               | -                 | -               | G3267     | Synthetic | -           | -                           | 46766                     | -        | -        | 54.85      | 23.95      |
| Macedonia   | Europe    | -               | -                 | -               | G3904     | Synthetic | -           | -                           | 10068                     | -        | -        | 41.65      | 21.85      |
| Moldova     | Europe    | Tighina Bendery | Dniestr           | Dniestr         | G0525     | GRDC      | 6981800     | 66100                       | 66495                     | 46.830   | 29.471   | 46.95      | 29.35      |
| Moldova     | Europe    | -               | Dniestr           | Dniestr         | G1942     | DFO       | 2047        | -                           | 69597                     | 46.664   | 29.745   | 46.65      | 29.75      |
| Netherlands | Europe    | Lobith          | Rhine             | Rhine           | G0337     | GRDC      | 6435060     | 160800                      | 163315                    | 51.84    | 6.11     | 51.85      | 6.15       |
| Netherlands | Europe    | Megen Dorp      | Meuse - Mosa      | Rhine           | G0338     | GRDC      | 6421501     | 28980                       | 30034                     | 51.82    | 5.54     | 51.85      | 5.55       |
| Netherlands | Europe    | Lith            | Meuse - Mosa      | Rhine           | G0339     | GRDC      | 6421100     | 29000                       | 29092                     | 51.82    | 5.45     | 51.65      | 5.95       |
| Netherlands | Europe    | Venlo           | Meuse - Mosa      | Rhine           | G0343     | GRDC      | 6421102     | 26040                       | 27194                     | 51.68    | 6.17     | 51.55      | 6.05       |
| Netherlands | Europe    | Bunde           | Julianakanaal     | Rhine           | G0359     | GRDC      | 6421103     | -                           | 22572                     | 50.9     | 5.74     | 50.95      | 5.75       |
| Netherlands | Europe    | Smeermaas       | Zuid Willemsvaart | Rhine           | G0361     | GRDC      | 6421900     | -                           | 22013                     | 50.88    | 5.68     | 50.85      | 5.65       |



| Country     | Continent | Station Name        | River Name   | River Basin | GloFAS ID | Provider  | Provider ID | Catchment Area Provided km² | Catchment Area GloFAS km² | LAT Prov | LON Prov | LAT GloFAS | LON GloFAS |
|-------------|-----------|---------------------|--------------|-------------|-----------|-----------|-------------|-----------------------------|---------------------------|----------|----------|------------|------------|
| Netherlands | Europe    | Borgharen           | Meuse - Mosa | Rhine       | G0362     | GRDC      | 6421500     | 21301                       | 22013                     | 50.87    | 5.72     | 50.85      | 5.65       |
| Netherlands | Europe    | Sint Pieter Noord   | Meuse - Mosa | Rhine       | G0365     | GRDC      | 6421101     | 21300                       | 21211                     | 50.83    | 5.71     | 50.65      | 5.65       |
| Netherlands | Europe    | -                   | -            | -           | G3415     | Synthetic | -           | -                           | 164722                    | -        | -        | 51.95      | 4.85       |
| Netherlands | Europe    | -                   | -            | -           | G3422     | Synthetic | -           | -                           | 30817                     | -        | -        | 51.85      | 4.85       |
| Norway      | Europe    | Polmak Nye          | Tana         | Tana        | G0007     | GRDC      | 6730501     | 14161                       | 14107                     | 70.070   | 28.016   | 69.45      | 25.75      |
| Norway      | Europe    | Polmak              | Tana         | Tana        | G0008     | GRDC      | 6730500     | 14165                       | 24980                     | 70.07    | 28.05    | 70.05      | 27.95      |
| Norway      | Europe    | Losna               | Losna        | Gloma       | G0134     | GRDC      | 6731450     | 11210                       | 12237                     | 61.333   | 10.277   | 61.35      | 10.25      |
| Norway      | Europe    | Elverum             | Glama        | Gloma       | G0145     | GRDC      | 6731401     | 15426                       | 15377                     | 60.88    | 11.56    | 60.85      | 11.55      |
| Norway      | Europe    | Skarnes             | Glama        | Gloma       | G0157     | GRDC      | 6731402     | 20300                       | 20335                     | 60.254   | 11.677   | 60.25      | 11.65      |
| Norway      | Europe    | Dovikfoss           | Dramselv     | Dramselv    | G0161     | GRDC      | 6731310     | 16120                       | 16213                     | 59.880   | 9.908    | 59.95      | 9.95       |
| Norway      | Europe    | Solbergfoss         | Glama        | Gloma       | G0168     | GRDC      | 6731403     | 40540                       | 39972                     | 59.637   | 11.153   | 59.95      | 11.15      |
| Norway      | Europe    | Langnes             | Glama        | Gloma       | G0170     | GRDC      | 6731400     | 40540                       | 41456                     | 59.609   | 11.118   | 59.75      | 11.25      |
| Poland      | Europe    | Gorzow Wielkopolski | Warta        | Oder        | G0308     | GRDC      | 6457800     | 52404                       | 55398                     | 52.733   | 16.233   | 52.75      | 15.35      |
| Poland      | Europe    | Poznan              | Warta        | Oder        | G0317     | GRDC      | 6457820     | 25963                       | 25328                     | 52.416   | 16.966   | 52.45      | 16.95      |
| Poland      | Europe    | -                   | -            | -           | G3381     | Synthetic | -           | -                           | 57171                     | -        | -        | 52.55      | 14.75      |
| Poland      | Europe    | -                   | -            | -           | G3382     | Synthetic | -           | -                           | 29463                     | -        | -        | 52.55      | 21.05      |
| Poland      | Europe    | -                   | -            | -           | G3383     | Synthetic | -           | -                           | 39186                     | -        | -        | 52.55      | 21.15      |
| Poland      | Europe    | -                   | -            | -           | G3389     | Synthetic | -           | -                           | 76326                     | -        | -        | 52.45      | 20.75      |
| Poland      | Europe    | -                   | -            | -           | G3395     | Synthetic | -           | -                           | 86596                     | -        | -        | 52.35      | 20.75      |
| Poland      | Europe    | -                   | -            | -           | G3423     | Synthetic | -           | -                           | 74040                     | -        | -        | 51.85      | 21.35      |
| Poland      | Europe    | -                   | -            | -           | G3430     | Synthetic | -           | -                           | 9122                      | -        | -        | 51.75      | 21.25      |
| Poland      | Europe    | -                   | -            | -           | G3447     | Synthetic | -           | -                           | 10473                     | -        | -        | 51.55      | 21.95      |
| Poland      | Europe    | -                   | -            | -           | G3455     | Synthetic | -           | -                           | 58838                     | -        | -        | 51.45      | 21.85      |
| Poland      | Europe    | -                   | -            | -           | G3499     | Synthetic | -           | -                           | 32905                     | -        | -        | 50.65      | 21.75      |
| Poland      | Europe    | -                   | -            | -           | G3500     | Synthetic | -           | -                           | 17086                     | -        | -        | 50.65      | 21.95      |
| Poland      | Europe    | -                   | -            | -           | G3535     | Synthetic | -           | -                           | 13003                     | -        | -        | 50.15      | 20.65      |
| Portugal    | Europe    | Foz Do Mouro        | Minho        | -           | G0672     | GRDC      | 6111100     | 15457                       | 15501                     | 42.08    | -8.38    | 42.15      | -8.25      |
| Portugal    | Europe    | Almourol            | Tejo         | Tejo        | G0737     | GRDC      | 6113050     | 67490                       | 68306                     | 39.47    | -8.37    | 39.45      | -8.35      |
| Portugal    | Europe    | Pulo Do Lobo        | Guadiana     | Guadiana    | G0779     | GRDC      | 6116200     | 60883                       | 60885                     | 37.82    | -7.63    | 37.95      | -7.65      |
| Romania     | Europe    | Satu Mare           | Szamos       | Danube      | G0488     | GRDC      | 6744500     | 15385                       | 15829                     | 47.787   | 22.876   | 47.75      | 22.85      |
| Romania     | Europe    | Dragesti            | Siret        | Danube      | G0529     | GRDC      | 6742701     | 11899                       | 12158                     | 46.725   | 26.946   | 46.75      | 26.95      |
| Romania     | Europe    | Arad                | Maros        | Danube      | G0553     | GRDC      | 6744200     | 27280                       | 27582                     | 46.160   | 21.321   | 46.15      | 21.35      |
| Romania     | Europe    | Alba Iulia          | Maros        | Danube      | G0559     | GRDC      | 6744201     | 18055                       | 17418                     | 46.037   | 23.581   | 46.15      | 23.65      |
| Romania     | Europe    | Lungoci             | Siret        | Danube      | G0578     | GRDC      | 6742700     | 36030                       | 38764                     | 45.555   | 27.512   | 45.55      | 27.55      |
| Romania     | Europe    | Cornet              | Olt          | Danube      | G0585     | GRDC      | 6742451     | 13733                       | 14180                     | 45.385   | 24.299   | 45.45      | 24.25      |
| Romania     | Europe    | Ceatal Izmail       | Danube       | Danube      | G0591     | GRDC      | 6742900     | 807000                      | 788003                    | 45.216   | 28.716   | 45.25      | 28.75      |
| Romania     | Europe    | Bazias              | Danube       | Danube      | G0608     | GRDC      | 6742201     | 570896                      | 561908                    | 44.814   | 21.379   | 44.85      | 21.35      |
| Romania     | Europe    | Orsova 1971:Drobeta | Danube       | Danube      | G0612     | GRDC      | 6742200     | 576232                      | 576374                    | 44.7     | 22.42    | 44.05      | 22.95      |
| Romania     | Europe    | Harsova             | Danube       | Danube      | G0615     | GRDC      | 6742800     | 709100                      | 709758                    | 44.683   | 27.092   | 45.25      | 27.95      |

| Country            | Continent | Station Name           | River Name      | River Basin      | GloFAS ID | Provider  | Provider ID | Catchment Area Provided km² | Catchment Area GloFAS km² | LAT Prov | LON Prov | LAT GloFAS | LON GloFAS |
|--------------------|-----------|------------------------|-----------------|------------------|-----------|-----------|-------------|-----------------------------|---------------------------|----------|----------|------------|------------|
| Romania            | Europe    | Zimnicea               | Danube          | Danube           | G0639     | GRDC      | 6742500     | 658400                      | 642775                    | 43.627   | 25.354   | 43.65      | 25.35      |
| Romania            | Europe    | -                      | Prut            | Danube           | G1835     | DFO       | 731         | -                           | 23839                     | 46.664   | 28.215   | 46.65      | 28.25      |
| Romania            | Europe    | -                      | -               | -                | G3789     | Synthetic | -           | -                           | 28626                     | -        | -        | 45.55      | 28.15      |
| Romania            | Europe    | -                      | -               | -                | G3833     | Synthetic | -           | -                           | 13359                     | -        | -        | 44.65      | 27.85      |
| Romania            | Europe    | -                      | -               | -                | G3834     | Synthetic | -           | -                           | 691954                    | -        | -        | 44.65      | 27.95      |
| Romania            | Europe    | -                      | -               | -                | G3858     | Synthetic | -           | -                           | 24798                     | -        | -        | 43.75      | 24.75      |
| Russian Federation | Europe    | Verkhnetulomskiy Ges   | Tuloma          | Tuloma           | G0019     | GRDC      | 6971130     | 17500                       | 18192                     | 68.606   | 31.797   | 68.55      | 31.75      |
| Russian Federation | Europe    | Oksino                 | Pechora         | Pechora          | G0028     | GRDC      | 6970700     | 312000                      | 325932                    | 67.6     | 52.2     | 67.55      | 52.25      |
| Russian Federation | Europe    | Kanevka                | Ponoy           | Ponoy            | G0039     | GRDC      | 6971451     | 10200                       | 4122                      | 67.133   | 39.666   | 67.15      | 39.65      |
| Russian Federation | Europe    | Knyazhegubskoye Ges    | Kovda           | Kovda            | G0044     | GRDC      | 6972860     | 25900                       | 11412                     | 66.77    | 32.34    | 66.75      | 32.35      |
| Russian Federation | Europe    | Igumnovo Igumkovo      | Peza            | Mezen            | G0055     | GRDC      | 6970560     | 12000                       | 11979                     | 65.816   | 45.033   | 65.75      | 46.05      |
| Russian Federation | Europe    | Ust Tsilma             | Pechora         | Pechora          | G0063     | GRDC      | 6970701     | 248000                      | 260031                    | 65.449   | 52.097   | 65.35      | 52.75      |
| Russian Federation | Europe    | Malonisogorskaya       | Mezen           | Mezen            | G0070     | GRDC      | 6970500     | 56400                       | 57713                     | 65.033   | 45.616   | 64.95      | 45.75      |
| Russian Federation | Europe    | Putkinskaya Ges        | Kem             | Kem              | G0073     | GRDC      | 6972801     | 28700                       | 29928                     | 64.95    | 34.62    | 64.15      | 34.25      |
| Russian Federation | Europe    | Kulogory               | Pinega          | North-European-  | G0079     | GRDC      | 6970400     | 36700                       | 36690                     | 64.71    | 43.48    | 64.65      | 43.75      |
| Russian Federation | Europe    | Ust Pinega             | Severnaya Dvina | Northern Dvina - | G0088     | GRDC      | 6970250     | 348000                      | 285231                    | 64.15    | 41.916   | 64.25      | 41.65      |
| Russian Federation | Europe    | Porog                  | Onega           | Onega            | G0095     | GRDC      | 6970100     | 55770                       | 63848                     | 63.833   | 38.483   | 63.75      | 38.55      |
| Russian Federation | Europe    | Xii Ges                | Svir            | Neva             | G0144     | GRDC      | 6972610     | 67100                       | 67178                     | 60.93    | 34.3     | 60.65      | 32.95      |
| Russian Federation | Europe    | Novosaratovka          | Neva            | Neva             | G0164     | GRDC      | 6972430     | 281000                      | 224915                    | 59.837   | 30.529   | 59.85      | 30.55      |
| Russian Federation | Europe    | Rybinskaya Ges         | Volga           | Volga            | G0198     | GRDC      | 6975010     | 150000                      | 190853                    | 58.18    | 38.72    | 58.15      | 38.65      |
| Russian Federation | Europe    | Murom                  | Oka             | Volga            | G0251     | GRDC      | 6975110     | 188000                      | 188797                    | 55.565   | 42.041   | 54.85      | 41.75      |
| Russian Federation | Europe    | Ufa                    | Belaya          | Volga            | G0270     | GRDC      | 6976450     | 100000                      | 117274                    | 54.542   | 55.992   | 54.85      | 56.05      |
| Russian Federation | Europe    | Orenburg               | Ural            | Ural             | G0342     | GRDC      | 2919100     | 82300                       | 83988                     | 51.68    | 55.1     | 51.75      | 55.05      |
| Russian Federation | Europe    | Kazanskaya             | Don             | Don              | G0406     | GRDC      | 6978251     | 102000                      | 102662                    | 49.793   | 41.146   | 49.95      | 40.75      |
| Russian Federation | Europe    | Volgograd Power Plant  | Volga           | Volga            | G0441     | GRDC      | 6977100     | 1360000                     | 1445620                   | 48.804   | 44.585   | 48.85      | 44.65      |
| Russian Federation | Europe    | Razdorskaya            | Don             | Don              | G0504     | GRDC      | 6978250     | 378000                      | 387479                    | 47.540   | 40.647   | 47.55      | 40.65      |
| Russian Federation | Europe    | Tikhovsky              | Kuban           | Kuban            | G0592     | GRDC      | 6983350     | 48100                       | 47468                     | 45.191   | 38.229   | 45.05      | 38.85      |
| Russian Federation | Europe    | Krasnodar              | Kuban           | Kuban            | G0594     | GRDC      | 6983355     | 45900                       | 46400                     | 45.032   | 38.976   | 44.95      | 39.15      |
| Russian Federation | Europe    | Kem At Yushkozero      | Kem             | Kem              | G1562     | SHI       | 49036       | 19800                       | 19562                     | 64.78    | 32.17    | 64.95      | 32.15      |
| Russian Federation | Europe    | Kem At Putkinskaya Ges | Kem             | Kem              | G1563     | SHI       | 49041       | 27700                       | 29184                     | 64.93    | 34.48    | 64.05      | 34.25      |
| Russian Federation | Europe    | Sukhona At Raban Ga    | Sukhona         | Volga            | G1564     | SHI       | 70085       | 15500                       | 15472                     | 59.43    | 40.22    | 59.45      | 40.15      |
| Russian Federation | Europe    | Vim At Veslyana        | Vim             | Northern Dvina - | G1565     | SHI       | 70238       | 19100                       | 21784                     | 62.98    | 50.88    | 62.95      | 50.85      |
| Russian Federation | Europe    | Pinega At Kulogory     | Pinega          | North-European-  | G1566     | SHI       | 70334       | 36700                       | 36690                     | 64.72    | 43.48    | 64.65      | 43.75      |
| Russian Federation | Europe    | Peza At Igumnovo       | Peza            | Mezen            | G1567     | SHI       | 70401       | 12000                       | 11979                     | 65.82    | 45.1     | 65.75      | 46.05      |
| Russian Federation | Europe    | Izhma At Ust Ukhta     | Izhma           | Pechora          | G1568     | SHI       | 70509       | 15000                       | 14483                     | 63.62    | 53.9     | 63.65      | 53.75      |
| Russian Federation | Europe    | Ponoy At Kanevka       | Ponoy           | Ponoy            | G1569     | SHI       | 71168       | 10200                       | 10896                     | 67.13    | 37.66    | 66.85      | 37.65      |
| Russian Federation | Europe    | -                      | -               | -                | G2164     | Synthetic | -           | -                           | 5252                      | -        | -        | 68.75      | 64.85      |
| Russian Federation | Europe    | -                      | -               | -                | G2168     | Synthetic | -           | -                           | 8783                      | -        | -        | 68.65      | 31.15      |
| Russian Federation | Europe    | -                      | -               | -                | G2223     | Synthetic | -           | -                           | 330074                    | -        | -        | 67.95      | 53.55      |

| Country            | Continent | Station Name | River Name | River Basin | GloFAS ID | Provider  | Provider ID | Catchment Area Provided km <sup>2</sup> | Catchment Area GloFAS km <sup>2</sup> | LAT Prov | LON Prov | LAT GloFAS | LON GloFAS |
|--------------------|-----------|--------------|------------|-------------|-----------|-----------|-------------|-----------------------------------------|---------------------------------------|----------|----------|------------|------------|
| Russian Federation | Europe    | -            | -          | -           | G2251     | Synthetic | -           | -                                       | 5510                                  | -        | -        | 67.45      | 58.35      |
| Russian Federation | Europe    | -            | -          | -           | G2255     | Synthetic | -           | -                                       | 8883                                  | -        | -        | 67.35      | 58.35      |
| Russian Federation | Europe    | -            | -          | -           | G2270     | Synthetic | -           | -                                       | 309231                                | -        | -        | 67.15      | 52.35      |
| Russian Federation | Europe    | -            | -          | -           | G2281     | Synthetic | -           | -                                       | 12761                                 | -        | -        | 67.05      | 52.25      |
| Russian Federation | Europe    | -            | -          | -           | G2295     | Synthetic | -           | -                                       | 6041                                  | -        | -        | 66.85      | 52.55      |
| Russian Federation | Europe    | -            | -          | -           | G2311     | Synthetic | -           | -                                       | 299136                                | -        | -        | 66.65      | 52.45      |
| Russian Federation | Europe    | -            | -          | -           | G2312     | Synthetic | -           | -                                       | 6793                                  | -        | -        | 66.65      | 59.35      |
| Russian Federation | Europe    | -            | -          | -           | G2323     | Synthetic | -           | -                                       | 57026                                 | -        | -        | 66.55      | 59.45      |
| Russian Federation | Europe    | -            | -          | -           | G2324     | Synthetic | -           | -                                       | 10107                                 | -        | -        | 66.55      | 60.55      |
| Russian Federation | Europe    | -            | -          | -           | G2325     | Synthetic | -           | -                                       | 18232                                 | -        | -        | 66.55      | 62.05      |
| Russian Federation | Europe    | -            | -          | -           | G2338     | Synthetic | -           | -                                       | 10848                                 | -        | -        | 66.45      | 56.35      |
| Russian Federation | Europe    | -            | -          | -           | G2339     | Synthetic | -           | -                                       | 28209                                 | -        | -        | 66.45      | 60.55      |
| Russian Federation | Europe    | -            | -          | -           | G2347     | Synthetic | -           | -                                       | 199997                                | -        | -        | 66.35      | 56.35      |
| Russian Federation | Europe    | -            | -          | -           | G2348     | Synthetic | -           | -                                       | 40661                                 | -        | -        | 66.35      | 59.95      |
| Russian Federation | Europe    | -            | -          | -           | G2370     | Synthetic | -           | -                                       | 15462                                 | -        | -        | 66.15      | 59.85      |
| Russian Federation | Europe    | -            | -          | -           | G2378     | Synthetic | -           | -                                       | 24786                                 | -        | -        | 66.05      | 57.15      |
| Russian Federation | Europe    | -            | -          | -           | G2390     | Synthetic | -           | -                                       | 100201                                | -        | -        | 65.95      | 56.95      |
| Russian Federation | Europe    | -            | -          | -           | G2391     | Synthetic | -           | -                                       | 74440                                 | -        | -        | 65.95      | 57.15      |
| Russian Federation | Europe    | -            | -          | -           | G2403     | Synthetic | -           | -                                       | 97926                                 | -        | -        | 65.85      | 56.85      |
| Russian Federation | Europe    | -            | -          | -           | G2409     | Synthetic | -           | -                                       | 22286                                 | -        | -        | 65.75      | 52.05      |
| Russian Federation | Europe    | -            | -          | -           | G2420     | Synthetic | -           | -                                       | 17631                                 | -        | -        | 65.65      | 44.65      |
| Russian Federation | Europe    | -            | -          | -           | G2421     | Synthetic | -           | -                                       | 266834                                | -        | -        | 65.65      | 52.05      |
| Russian Federation | Europe    | -            | -          | -           | G2422     | Synthetic | -           | -                                       | 7105                                  | -        | -        | 65.65      | 56.65      |
| Russian Federation | Europe    | -            | -          | -           | G2431     | Synthetic | -           | -                                       | 62882                                 | -        | -        | 65.55      | 44.65      |
| Russian Federation | Europe    | -            | -          | -           | G2432     | Synthetic | -           | -                                       | 7015                                  | -        | -        | 65.55      | 50.95      |
| Russian Federation | Europe    | -            | -          | -           | G2433     | Synthetic | -           | -                                       | 90496                                 | -        | -        | 65.55      | 56.85      |
| Russian Federation | Europe    | -            | -          | -           | G2441     | Synthetic | -           | -                                       | 12644                                 | -        | -        | 65.45      | 50.95      |
| Russian Federation | Europe    | -            | -          | -           | G2442     | Synthetic | -           | -                                       | 260965                                | -        | -        | 65.45      | 52.15      |
| Russian Federation | Europe    | -            | -          | -           | G2450     | Synthetic | -           | -                                       | 5650                                  | -        | -        | 65.35      | 51.95      |
| Russian Federation | Europe    | -            | -          | -           | G2458     | Synthetic | -           | -                                       | 10484                                 | -        | -        | 65.25      | 57.05      |
| Russian Federation | Europe    | -            | -          | -           | G2471     | Synthetic | -           | -                                       | 17131                                 | -        | -        | 65.15      | 33.05      |
| Russian Federation | Europe    | -            | -          | -           | G2472     | Synthetic | -           | -                                       | 77602                                 | -        | -        | 65.15      | 57.15      |
| Russian Federation | Europe    | -            | -          | -           | G2484     | Synthetic | -           | -                                       | 22181                                 | -        | -        | 65.05      | 32.95      |
| Russian Federation | Europe    | -            | -          | -           | G2556     | Synthetic | -           | -                                       | 60085                                 | -        | -        | 64.25      | 57.45      |
| Russian Federation | Europe    | -            | -          | -           | G2557     | Synthetic | -           | -                                       | 10064                                 | -        | -        | 64.25      | 57.65      |
| Russian Federation | Europe    | -            | -          | -           | G2592     | Synthetic | -           | -                                       | 20599                                 | -        | -        | 63.85      | 44.85      |
| Russian Federation | Europe    | -            | -          | -           | G2601     | Synthetic | -           | -                                       | 10075                                 | -        | -        | 63.75      | 34.35      |
| Russian Federation | Europe    | -            | -          | -           | G2631     | Synthetic | -           | -                                       | 13391                                 | -        | -        | 63.55      | 41.65      |
| Russian Federation | Europe    | -            | -          | -           | G2647     | Synthetic | -           | -                                       | 265032                                | -        | -        | 63.45      | 41.85      |

| Country            | Continent | Station Name | River Name | River Basin | GloFAS ID | Provider  | Provider ID | Catchment Area Provided km <sup>2</sup> | Catchment Area GloFAS km <sup>2</sup> | LAT Prov | LON Prov | LAT GloFAS | LON GloFAS |
|--------------------|-----------|--------------|------------|-------------|-----------|-----------|-------------|-----------------------------------------|---------------------------------------|----------|----------|------------|------------|
| Russian Federation | Europe    | -            | -          | -           | G2704     | Synthetic | -           | -                                       | 204506                                | -        | -        | 62.75      | 42.95      |
| Russian Federation | Europe    | -            | -          | -           | G2710     | Synthetic | -           | -                                       | 49894                                 | -        | -        | 62.65      | 42.95      |
| Russian Federation | Europe    | -            | -          | -           | G2711     | Synthetic | -           | -                                       | 31116                                 | -        | -        | 62.65      | 56.35      |
| Russian Federation | Europe    | -            | -          | -           | G2717     | Synthetic | -           | -                                       | 16973                                 | -        | -        | 62.55      | 56.85      |
| Russian Federation | Europe    | -            | -          | -           | G2725     | Synthetic | -           | -                                       | 34660                                 | -        | -        | 62.45      | 39.75      |
| Russian Federation | Europe    | -            | -          | -           | G2726     | Synthetic | -           | -                                       | 10200                                 | -        | -        | 62.45      | 39.85      |
| Russian Federation | Europe    | -            | -          | -           | G2727     | Synthetic | -           | -                                       | 11703                                 | -        | -        | 62.45      | 56.75      |
| Russian Federation | Europe    | -            | -          | -           | G2750     | Synthetic | -           | -                                       | 28301                                 | -        | -        | 62.25      | 50.45      |
| Russian Federation | Europe    | -            | -          | -           | G2764     | Synthetic | -           | -                                       | 10139                                 | -        | -        | 62.05      | 38.85      |
| Russian Federation | Europe    | -            | -          | -           | G2765     | Synthetic | -           | -                                       | 71873                                 | -        | -        | 62.05      | 50.25      |
| Russian Federation | Europe    | -            | -          | -           | G2776     | Synthetic | -           | -                                       | 22521                                 | -        | -        | 61.95      | 38.95      |
| Russian Federation | Europe    | -            | -          | -           | G2777     | Synthetic | -           | -                                       | 8322                                  | -        | -        | 61.95      | 52.35      |
| Russian Federation | Europe    | -            | -          | -           | G2778     | Synthetic | -           | -                                       | 29557                                 | -        | -        | 61.95      | 52.45      |
| Russian Federation | Europe    | -            | -          | -           | G2795     | Synthetic | -           | -                                       | 49698                                 | -        | -        | 61.75      | 50.85      |
| Russian Federation | Europe    | -            | -          | -           | G2796     | Synthetic | -           | -                                       | 39840                                 | -        | -        | 61.75      | 51.85      |
| Russian Federation | Europe    | -            | -          | -           | G2804     | Synthetic | -           | -                                       | 13331                                 | -        | -        | 61.65      | 39.05      |
| Russian Federation | Europe    | -            | -          | -           | G2805     | Synthetic | -           | -                                       | 8025                                  | -        | -        | 61.65      | 39.25      |
| Russian Federation | Europe    | -            | -          | -           | G2806     | Synthetic | -           | -                                       | 17812                                 | -        | -        | 61.65      | 50.85      |
| Russian Federation | Europe    | -            | -          | -           | G2807     | Synthetic | -           | -                                       | 6302                                  | -        | -        | 61.65      | 51.75      |
| Russian Federation | Europe    | -            | -          | -           | G2816     | Synthetic | -           | -                                       | 16517                                 | -        | -        | 61.55      | 54.05      |
| Russian Federation | Europe    | -            | -          | -           | G2823     | Synthetic | -           | -                                       | 23944                                 | -        | -        | 61.45      | 42.45      |
| Russian Federation | Europe    | -            | -          | -           | G2824     | Synthetic | -           | -                                       | 14598                                 | -        | -        | 61.45      | 42.55      |
| Russian Federation | Europe    | -            | -          | -           | G2825     | Synthetic | -           | -                                       | 8373                                  | -        | -        | 61.45      | 54.05      |
| Russian Federation | Europe    | -            | -          | -           | G2832     | Synthetic | -           | -                                       | 126200                                | -        | -        | 61.35      | 46.65      |
| Russian Federation | Europe    | -            | -          | -           | G2837     | Synthetic | -           | -                                       | 38281                                 | -        | -        | 61.25      | 35.55      |
| Russian Federation | Europe    | -            | -          | -           | G2838     | Synthetic | -           | -                                       | 53091                                 | -        | -        | 61.25      | 46.55      |
| Russian Federation | Europe    | -            | -          | -           | G2855     | Synthetic | -           | -                                       | 10626                                 | -        | -        | 61.05      | 42.05      |
| Russian Federation | Europe    | -            | -          | -           | G2856     | Synthetic | -           | -                                       | 6556                                  | -        | -        | 61.05      | 42.15      |
| Russian Federation | Europe    | -            | -          | -           | G2876     | Synthetic | -           | -                                       | 13129                                 | -        | -        | 60.75      | 46.25      |
| Russian Federation | Europe    | -            | -          | -           | G2882     | Synthetic | -           | -                                       | 37323                                 | -        | -        | 60.65      | 46.25      |
| Russian Federation | Europe    | -            | -          | -           | G2889     | Synthetic | -           | -                                       | 19492                                 | -        | -        | 60.55      | 46.55      |
| Russian Federation | Europe    | -            | -          | -           | G2893     | Synthetic | -           | -                                       | 17162                                 | -        | -        | 60.45      | 30.75      |
| Russian Federation | Europe    | -            | -          | -           | G2894     | Synthetic | -           | -                                       | 7081                                  | -        | -        | 60.45      | 32.95      |
| Russian Federation | Europe    | -            | -          | -           | G2895     | Synthetic | -           | -                                       | 16172                                 | -        | -        | 60.45      | 46.55      |
| Russian Federation | Europe    | -            | -          | -           | G2896     | Synthetic | -           | -                                       | 13971                                 | -        | -        | 60.45      | 56.45      |
| Russian Federation | Europe    | -            | -          | -           | G2904     | Synthetic | -           | -                                       | 8138                                  | -        | -        | 60.35      | 53.95      |
| Russian Federation | Europe    | -            | -          | -           | G2905     | Synthetic | -           | -                                       | 18183                                 | -        | -        | 60.35      | 56.65      |
| Russian Federation | Europe    | -            | -          | -           | G2912     | Synthetic | -           | -                                       | 18017                                 | -        | -        | 60.25      | 53.95      |
| Russian Federation | Europe    | -            | -          | -           | G2913     | Synthetic | -           | -                                       | 29790                                 | -        | -        | 60.25      | 55.15      |

| Country            | Continent | Station Name | River Name | River Basin | GloFAS ID | Provider  | Provider ID | Catchment Area Provided km <sup>2</sup> | Catchment Area GloFAS km <sup>2</sup> | LAT Prov | LON Prov | LAT GloFAS | LON GloFAS |
|--------------------|-----------|--------------|------------|-------------|-----------|-----------|-------------|-----------------------------------------|---------------------------------------|----------|----------|------------|------------|
| Russian Federation | Europe    | -            | -          | -           | G2921     | Synthetic | -           | -                                       | 10546                                 | -        | -        | 60.15      | 55.15      |
| Russian Federation | Europe    | -            | -          | -           | G2928     | Synthetic | -           | -                                       | 29587                                 | -        | -        | 60.05      | 31.05      |
| Russian Federation | Europe    | -            | -          | -           | G2933     | Synthetic | -           | -                                       | 10300                                 | -        | -        | 59.95      | 32.45      |
| Russian Federation | Europe    | -            | -          | -           | G2934     | Synthetic | -           | -                                       | 53270                                 | -        | -        | 59.95      | 56.35      |
| Russian Federation | Europe    | -            | -          | -           | G2935     | Synthetic | -           | -                                       | 32797                                 | -        | -        | 59.95      | 56.45      |
| Russian Federation | Europe    | -            | -          | -           | G2940     | Synthetic | -           | -                                       | 83000                                 | -        | -        | 59.85      | 32.35      |
| Russian Federation | Europe    | -            | -          | -           | G2953     | Synthetic | -           | -                                       | 16930                                 | -        | -        | 59.65      | 38.45      |
| Russian Federation | Europe    | -            | -          | -           | G2963     | Synthetic | -           | -                                       | 21554                                 | -        | -        | 59.55      | 39.45      |
| Russian Federation | Europe    | -            | -          | -           | G2977     | Synthetic | -           | -                                       | 8124                                  | -        | -        | 59.35      | 50.75      |
| Russian Federation | Europe    | -            | -          | -           | G2984     | Synthetic | -           | -                                       | 9025                                  | -        | -        | 59.25      | 50.95      |
| Russian Federation | Europe    | -            | -          | -           | G2992     | Synthetic | -           | -                                       | 14071                                 | -        | -        | 59.15      | 37.75      |
| Russian Federation | Europe    | -            | -          | -           | G2993     | Synthetic | -           | -                                       | 55810                                 | -        | -        | 59.15      | 37.85      |
| Russian Federation | Europe    | -            | -          | -           | G3007     | Synthetic | -           | -                                       | 10157                                 | -        | -        | 58.95      | 36.45      |
| Russian Federation | Europe    | -            | -          | -           | G3015     | Synthetic | -           | -                                       | 20374                                 | -        | -        | 58.85      | 36.55      |
| Russian Federation | Europe    | -            | -          | -           | G3032     | Synthetic | -           | -                                       | 27337                                 | -        | -        | 58.65      | 50.15      |
| Russian Federation | Europe    | -            | -          | -           | G3045     | Synthetic | -           | -                                       | 21117                                 | -        | -        | 58.55      | 50.15      |
| Russian Federation | Europe    | -            | -          | -           | G3052     | Synthetic | -           | -                                       | 12716                                 | -        | -        | 58.45      | 48.55      |
| Russian Federation | Europe    | -            | -          | -           | G3058     | Synthetic | -           | -                                       | 61318                                 | -        | -        | 58.35      | 48.55      |
| Russian Federation | Europe    | -            | -          | -           | G3073     | Synthetic | -           | -                                       | 48755                                 | -        | -        | 58.15      | 56.45      |
| Russian Federation | Europe    | -            | -          | -           | G3074     | Synthetic | -           | -                                       | 25298                                 | -        | -        | 58.15      | 56.65      |
| Russian Federation | Europe    | -            | -          | -           | G3079     | Synthetic | -           | -                                       | 7552                                  | -        | -        | 58.05      | 31.65      |
| Russian Federation | Europe    | -            | -          | -           | G3080     | Synthetic | -           | -                                       | 23254                                 | -        | -        | 58.05      | 56.65      |
| Russian Federation | Europe    | -            | -          | -           | G3082     | Synthetic | -           | -                                       | 18487                                 | -        | -        | 57.95      | 31.65      |
| Russian Federation | Europe    | -            | -          | -           | G3086     | Synthetic | -           | -                                       | 21109                                 | -        | -        | 57.85      | 40.65      |
| Russian Federation | Europe    | -            | -          | -           | G3087     | Synthetic | -           | -                                       | 19924                                 | -        | -        | 57.85      | 43.75      |
| Russian Federation | Europe    | -            | -          | -           | G3092     | Synthetic | -           | -                                       | 193922                                | -        | -        | 57.75      | 39.75      |
| Russian Federation | Europe    | -            | -          | -           | G3093     | Synthetic | -           | -                                       | 204426                                | -        | -        | 57.75      | 40.55      |
| Russian Federation | Europe    | -            | -          | -           | G3097     | Synthetic | -           | -                                       | 77167                                 | -        | -        | 57.65      | 48.95      |
| Russian Federation | Europe    | -            | -          | -           | G3104     | Synthetic | -           | -                                       | 15692                                 | -        | -        | 57.55      | 48.95      |
| Russian Federation | Europe    | -            | -          | -           | G3140     | Synthetic | -           | -                                       | 8080                                  | -        | -        | 56.95      | 35.85      |
| Russian Federation | Europe    | -            | -          | -           | G3141     | Synthetic | -           | -                                       | 104749                                | -        | -        | 56.95      | 50.35      |
| Russian Federation | Europe    | -            | -          | -           | G3142     | Synthetic | -           | -                                       | 18012                                 | -        | -        | 56.95      | 50.55      |
| Russian Federation | Europe    | -            | -          | -           | G3150     | Synthetic | -           | -                                       | 24487                                 | -        | -        | 56.85      | 35.85      |
| Russian Federation | Europe    | -            | -          | -           | G3169     | Synthetic | -           | -                                       | 43218                                 | -        | -        | 56.45      | 46.55      |
| Russian Federation | Europe    | -            | -          | -           | G3175     | Synthetic | -           | -                                       | 279896                                | -        | -        | 56.35      | 43.85      |
| Russian Federation | Europe    | -            | -          | -           | G3178     | Synthetic | -           | -                                       | 7243                                  | -        | -        | 56.25      | 40.55      |
| Russian Federation | Europe    | -            | -          | -           | G3179     | Synthetic | -           | -                                       | 254120                                | -        | -        | 56.25      | 43.95      |
| Russian Federation | Europe    | -            | -          | -           | G3180     | Synthetic | -           | -                                       | 199419                                | -        | -        | 56.25      | 54.15      |
| Russian Federation | Europe    | -            | -          | -           | G3185     | Synthetic | -           | -                                       | 16072                                 | -        | -        | 56.15      | 40.45      |

| Country            | Continent | Station Name | River Name | River Basin | GloFAS ID | Provider  | Provider ID | Catchment Area Provided km <sup>2</sup> | Catchment Area GloFAS km <sup>2</sup> | LAT Prov | LON Prov | LAT GloFAS | LON GloFAS |
|--------------------|-----------|--------------|------------|-------------|-----------|-----------|-------------|-----------------------------------------|---------------------------------------|----------|----------|------------|------------|
| Russian Federation | Europe    | -            | -          | -           | G3186     | Synthetic | -           | -                                       | 44545                                 | -        | -        | 56.15      | 42.85      |
| Russian Federation | Europe    | -            | -          | -           | G3187     | Synthetic | -           | -                                       | 547544                                | -        | -        | 56.15      | 45.85      |
| Russian Federation | Europe    | -            | -          | -           | G3193     | Synthetic | -           | -                                       | 206650                                | -        | -        | 56.05      | 43.05      |
| Russian Federation | Europe    | -            | -          | -           | G3194     | Synthetic | -           | -                                       | 538508                                | -        | -        | 56.05      | 44.85      |
| Russian Federation | Europe    | -            | -          | -           | G3195     | Synthetic | -           | -                                       | 69140                                 | -        | -        | 56.05      | 46.05      |
| Russian Federation | Europe    | -            | -          | -           | G3196     | Synthetic | -           | -                                       | 15111                                 | -        | -        | 56.05      | 57.75      |
| Russian Federation | Europe    | -            | -          | -           | G3202     | Synthetic | -           | -                                       | 207633                                | -        | -        | 55.95      | 53.65      |
| Russian Federation | Europe    | -            | -          | -           | G3204     | Synthetic | -           | -                                       | 689732                                | -        | -        | 55.85      | 48.55      |
| Russian Federation | Europe    | -            | -          | -           | G3205     | Synthetic | -           | -                                       | 146447                                | -        | -        | 55.85      | 53.55      |
| Russian Federation | Europe    | -            | -          | -           | G3209     | Synthetic | -           | -                                       | 7300                                  | -        | -        | 55.75      | 31.45      |
| Russian Federation | Europe    | -            | -          | -           | G3210     | Synthetic | -           | -                                       | 9168                                  | -        | -        | 55.75      | 31.55      |
| Russian Federation | Europe    | -            | -          | -           | G3211     | Synthetic | -           | -                                       | 17638                                 | -        | -        | 55.75      | 48.55      |
| Russian Federation | Europe    | -            | -          | -           | G3212     | Synthetic | -           | -                                       | 7849                                  | -        | -        | 55.75      | 54.65      |
| Russian Federation | Europe    | -            | -          | -           | G3213     | Synthetic | -           | -                                       | 38026                                 | -        | -        | 55.75      | 56.85      |
| Russian Federation | Europe    | -            | -          | -           | G3218     | Synthetic | -           | -                                       | 134117                                | -        | -        | 55.65      | 51.45      |
| Russian Federation | Europe    | -            | -          | -           | G3219     | Synthetic | -           | -                                       | 8609                                  | -        | -        | 55.65      | 56.85      |
| Russian Federation | Europe    | -            | -          | -           | G3226     | Synthetic | -           | -                                       | 192140                                | -        | -        | 55.55      | 42.05      |
| Russian Federation | Europe    | -            | -          | -           | G3227     | Synthetic | -           | -                                       | 8557                                  | -        | -        | 55.55      | 42.25      |
| Russian Federation | Europe    | -            | -          | -           | G3228     | Synthetic | -           | -                                       | 8281                                  | -        | -        | 55.55      | 45.95      |
| Russian Federation | Europe    | -            | -          | -           | G3229     | Synthetic | -           | -                                       | 56480                                 | -        | -        | 55.55      | 46.05      |
| Russian Federation | Europe    | -            | -          | -           | G3230     | Synthetic | -           | -                                       | 391044                                | -        | -        | 55.55      | 51.55      |
| Russian Federation | Europe    | -            | -          | -           | G3231     | Synthetic | -           | -                                       | 129529                                | -        | -        | 55.55      | 54.75      |
| Russian Federation | Europe    | -            | -          | -           | G3251     | Synthetic | -           | -                                       | 17679                                 | -        | -        | 55.15      | 38.75      |
| Russian Federation | Europe    | -            | -          | -           | G3257     | Synthetic | -           | -                                       | 76954                                 | -        | -        | 55.05      | 38.75      |
| Russian Federation | Europe    | -            | -          | -           | G3268     | Synthetic | -           | -                                       | 11235                                 | -        | -        | 54.85      | 46.45      |
| Russian Federation | Europe    | -            | -          | -           | G3275     | Synthetic | -           | -                                       | 37584                                 | -        | -        | 54.75      | 46.65      |
| Russian Federation | Europe    | -            | -          | -           | G3280     | Synthetic | -           | -                                       | 51820                                 | -        | -        | 54.65      | 41.95      |
| Russian Federation | Europe    | -            | -          | -           | G3281     | Synthetic | -           | -                                       | 13601                                 | -        | -        | 54.65      | 55.85      |
| Russian Federation | Europe    | -            | -          | -           | G3282     | Synthetic | -           | -                                       | 49030                                 | -        | -        | 54.65      | 55.95      |
| Russian Federation | Europe    | -            | -          | -           | G3286     | Synthetic | -           | -                                       | 16402                                 | -        | -        | 54.55      | 36.05      |
| Russian Federation | Europe    | -            | -          | -           | G3287     | Synthetic | -           | -                                       | 11894                                 | -        | -        | 54.55      | 56.55      |
| Russian Federation | Europe    | -            | -          | -           | G3290     | Synthetic | -           | -                                       | 22359                                 | -        | -        | 54.45      | 41.95      |
| Russian Federation | Europe    | -            | -          | -           | G3291     | Synthetic | -           | -                                       | 28943                                 | -        | -        | 54.45      | 42.15      |
| Russian Federation | Europe    | -            | -          | -           | G3296     | Synthetic | -           | -                                       | 39619                                 | -        | -        | 54.35      | 36.15      |
| Russian Federation | Europe    | -            | -          | -           | G3297     | Synthetic | -           | -                                       | 104123                                | -        | -        | 54.35      | 40.25      |
| Russian Federation | Europe    | -            | -          | -           | G3298     | Synthetic | -           | -                                       | 31400                                 | -        | -        | 54.35      | 56.45      |
| Russian Federation | Europe    | -            | -          | -           | G3302     | Synthetic | -           | -                                       | 9548                                  | -        | -        | 54.25      | 36.05      |
| Russian Federation | Europe    | -            | -          | -           | G3303     | Synthetic | -           | -                                       | 29550                                 | -        | -        | 54.25      | 36.25      |
| Russian Federation | Europe    | -            | -          | -           | G3304     | Synthetic | -           | -                                       | 10275                                 | -        | -        | 54.25      | 40.25      |

| Country            | Continent | Station Name | River Name | River Basin | GloFAS ID | Provider  | Provider ID | Catchment Area Provided km <sup>2</sup> | Catchment Area GloFAS km <sup>2</sup> | LAT Prov | LON Prov | LAT GloFAS | LON GloFAS |
|--------------------|-----------|--------------|------------|-------------|-----------|-----------|-------------|-----------------------------------------|---------------------------------------|----------|----------|------------|------------|
| Russian Federation | Europe    | -            | -          | -           | G3316     | Synthetic | -           | -                                       | 18617                                 | -        | -        | 53.95      | 36.25      |
| Russian Federation | Europe    | -            | -          | -           | G3317     | Synthetic | -           | -                                       | 9666                                  | -        | -        | 53.95      | 36.35      |
| Russian Federation | Europe    | -            | -          | -           | G3318     | Synthetic | -           | -                                       | 1266310                               | -        | -        | 53.95      | 48.85      |
| Russian Federation | Europe    | -            | -          | -           | G3343     | Synthetic | -           | -                                       | 1285970                               | -        | -        | 53.45      | 50.05      |
| Russian Federation | Europe    | -            | -          | -           | G3344     | Synthetic | -           | -                                       | 11607                                 | -        | -        | 53.45      | 50.15      |
| Russian Federation | Europe    | -            | -          | -           | G3356     | Synthetic | -           | -                                       | 15213                                 | -        | -        | 53.25      | 50.65      |
| Russian Federation | Europe    | -            | -          | -           | G3358     | Synthetic | -           | -                                       | 47900                                 | -        | -        | 53.15      | 50.15      |
| Russian Federation | Europe    | -            | -          | -           | G3359     | Synthetic | -           | -                                       | 31317                                 | -        | -        | 53.15      | 50.65      |
| Russian Federation | Europe    | -            | -          | -           | G3373     | Synthetic | -           | -                                       | 17941                                 | -        | -        | 52.75      | 38.85      |
| Russian Federation | Europe    | -            | -          | -           | G3374     | Synthetic | -           | -                                       | 13220                                 | -        | -        | 52.75      | 38.95      |
| Russian Federation | Europe    | -            | -          | -           | G3407     | Synthetic | -           | -                                       | 8329                                  | -        | -        | 52.15      | 49.55      |
| Russian Federation | Europe    | -            | -          | -           | G3418     | Synthetic | -           | -                                       | 9140                                  | -        | -        | 51.95      | 49.45      |
| Russian Federation | Europe    | -            | -          | -           | G3424     | Synthetic | -           | -                                       | 9905                                  | -        | -        | 51.85      | 46.45      |
| Russian Federation | Europe    | -            | -          | -           | G3425     | Synthetic | -           | -                                       | 23980                                 | -        | -        | 51.85      | 47.75      |
| Russian Federation | Europe    | -            | -          | -           | G3426     | Synthetic | -           | -                                       | 26352                                 | -        | -        | 51.85      | 58.75      |
| Russian Federation | Europe    | -            | -          | -           | G3431     | Synthetic | -           | -                                       | 1402500                               | -        | -        | 51.75      | 46.55      |
| Russian Federation | Europe    | -            | -          | -           | G3441     | Synthetic | -           | -                                       | 38812                                 | -        | -        | 51.65      | 39.05      |
| Russian Federation | Europe    | -            | -          | -           | G3452     | Synthetic | -           | -                                       | 21372                                 | -        | -        | 51.55      | 39.15      |
| Russian Federation | Europe    | -            | -          | -           | G3453     | Synthetic | -           | -                                       | 120742                                | -        | -        | 51.55      | 53.45      |
| Russian Federation | Europe    | -            | -          | -           | G3457     | Synthetic | -           | -                                       | 13381                                 | -        | -        | 51.45      | 42.05      |
| Russian Federation | Europe    | -            | -          | -           | G3464     | Synthetic | -           | -                                       | 38468                                 | -        | -        | 51.35      | 58.75      |
| Russian Federation | Europe    | -            | -          | -           | G3472     | Synthetic | -           | -                                       | 19696                                 | -        | -        | 51.25      | 42.15      |
| Russian Federation | Europe    | -            | -          | -           | G3473     | Synthetic | -           | -                                       | 47249                                 | -        | -        | 51.25      | 58.55      |
| Russian Federation | Europe    | -            | -          | -           | G3474     | Synthetic | -           | -                                       | 8622                                  | -        | -        | 51.25      | 58.75      |
| Russian Federation | Europe    | -            | -          | -           | G3480     | Synthetic | -           | -                                       | 35445                                 | -        | -        | 51.15      | 41.65      |
| Russian Federation | Europe    | -            | -          | -           | G3481     | Synthetic | -           | -                                       | 18663                                 | -        | -        | 51.15      | 58.55      |
| Russian Federation | Europe    | -            | -          | -           | G3485     | Synthetic | -           | -                                       | 21029                                 | -        | -        | 51.05      | 54.65      |
| Russian Federation | Europe    | -            | -          | -           | G3494     | Synthetic | -           | -                                       | 15514                                 | -        | -        | 50.85      | 44.75      |
| Russian Federation | Europe    | -            | -          | -           | G3496     | Synthetic | -           | -                                       | 8903                                  | -        | -        | 50.75      | 44.55      |
| Russian Federation | Europe    | -            | -          | -           | G3501     | Synthetic | -           | -                                       | 73408                                 | -        | -        | 50.65      | 39.85      |
| Russian Federation | Europe    | -            | -          | -           | G3502     | Synthetic | -           | -                                       | 9540                                  | -        | -        | 50.65      | 39.95      |
| Russian Federation | Europe    | -            | -          | -           | G3513     | Synthetic | -           | -                                       | 9456                                  | -        | -        | 50.35      | 42.15      |
| Russian Federation | Europe    | -            | -          | -           | G3525     | Synthetic | -           | -                                       | 48140                                 | -        | -        | 50.25      | 42.05      |
| Russian Federation | Europe    | -            | -          | -           | G3526     | Synthetic | -           | -                                       | 12084                                 | -        | -        | 50.25      | 45.95      |
| Russian Federation | Europe    | -            | -          | -           | G3563     | Synthetic | -           | -                                       | 62792                                 | -        | -        | 49.65      | 42.35      |
| Russian Federation | Europe    | -            | -          | -           | G3564     | Synthetic | -           | -                                       | 35522                                 | -        | -        | 49.65      | 42.65      |
| Russian Federation | Europe    | -            | -          | -           | G3570     | Synthetic | -           | -                                       | 109766                                | -        | -        | 49.55      | 42.25      |
| Russian Federation | Europe    | -            | -          | -           | G3571     | Synthetic | -           | -                                       | 172968                                | -        | -        | 49.55      | 42.55      |
| Russian Federation | Europe    | -            | -          | -           | G3590     | Synthetic | -           | -                                       | 9600                                  | -        | -        | 49.25      | 43.95      |



| Country            | Continent | Station Name        | River Name    | River Basin | GloFAS ID | Provider  | Provider ID | Catchment Area Provided km² | Catchment Area GloFAS km² | LAT Prov | LON Prov | LAT GloFAS | LON GloFAS |
|--------------------|-----------|---------------------|---------------|-------------|-----------|-----------|-------------|-----------------------------|---------------------------|----------|----------|------------|------------|
| Russian Federation | Europe    | -                   | -             | -           | G3601     | Synthetic | -           | -                           | 212845                    | -        | -        | 49.15      | 43.75      |
| Russian Federation | Europe    | -                   | -             | -           | G3644     | Synthetic | -           | -                           | 12506                     | -        | -        | 48.35      | 43.05      |
| Russian Federation | Europe    | -                   | -             | -           | G3650     | Synthetic | -           | -                           | 81613                     | -        | -        | 48.25      | 40.75      |
| Russian Federation | Europe    | -                   | -             | -           | G3660     | Synthetic | -           | -                           | 10854                     | -        | -        | 48.15      | 40.85      |
| Russian Federation | Europe    | -                   | -             | -           | G3684     | Synthetic | -           | -                           | 100634                    | -        | -        | 47.65      | 40.85      |
| Russian Federation | Europe    | -                   | -             | -           | G3703     | Synthetic | -           | -                           | 50872                     | -        | -        | 47.25      | 40.35      |
| Russian Federation | Europe    | -                   | -             | -           | G3738     | Synthetic | -           | -                           | 26022                     | -        | -        | 46.55      | 41.95      |
| Russian Federation | Europe    | -                   | -             | -           | G3742     | Synthetic | -           | -                           | 15027                     | -        | -        | 46.45      | 41.85      |
| Russian Federation | Europe    | -                   | -             | -           | G3752     | Synthetic | -           | -                           | 1479430                   | -        | -        | 46.25      | 47.65      |
| Russian Federation | Europe    | -                   | -             | -           | G3760     | Synthetic | -           | -                           | 17409                     | -        | -        | 45.95      | 46.65      |
| Russian Federation | Europe    | -                   | -             | -           | G3765     | Synthetic | -           | -                           | 15756                     | -        | -        | 45.85      | 46.55      |
| Russian Federation | Europe    | -                   | -             | -           | G3773     | Synthetic | -           | -                           | 18063                     | -        | -        | 45.75      | 46.55      |
| Russian Federation | Europe    | -                   | -             | -           | G3774     | Synthetic | -           | -                           | 33906                     | -        | -        | 45.75      | 46.65      |
| Russian Federation | Europe    | -                   | -             | -           | G3815     | Synthetic | -           | -                           | 22287                     | -        | -        | 45.25      | 39.75      |
| Russian Federation | Europe    | -                   | -             | -           | G3818     | Synthetic | -           | -                           | 12286                     | -        | -        | 45.15      | 39.75      |
| Russian Federation | Europe    | -                   | -             | -           | G3837     | Synthetic | -           | -                           | 36241                     | -        | -        | 44.45      | 46.35      |
| Russian Federation | Europe    | -                   | -             | -           | G3869     | Synthetic | -           | -                           | 23002                     | -        | -        | 43.45      | 46.05      |
| Russian Federation | Europe    | -                   | -             | -           | G3874     | Synthetic | -           | -                           | 12380                     | -        | -        | 43.35      | 46.05      |
| Serbia             | Europe    | Senta               | Tisza         | Danube      | G0562     | GRDC      | 6544100     | 140130                      | 140777                    | 45.932   | 20.082   | 46.25      | 20.15      |
| Serbia             | Europe    | Bezdan              | Danube        | Danube      | G0566     | GRDC      | 6542100     | 210245                      | 211905                    | 45.85    | 18.87    | 46.25      | 18.95      |
| Serbia             | Europe    | Bogojevo            | Danube        | Danube      | G0579     | GRDC      | 6542200     | 251593                      | 257250                    | 45.53    | 19.08    | 45.55      | 19.05      |
| Serbia             | Europe    | Sremska Mitrovica   | Sava          | Danube      | G0599     | GRDC      | 6545800     | 87966                       | 84537                     | 44.981   | 19.618   | 44.75      | 20.35      |
| Serbia             | Europe    | Lubicevsky Most     | Velika Morava | Danube      | G0617     | GRDC      | 6547500     | 34345                       | 556200                    | 44.58    | 21.12    | 44.75      | 21.05      |
| Serbia             | Europe    | -                   | Sava          | Danube      | G1764     | DFO       | 165         | -                           | 79429                     | 44.684   | 20.025   | 44.65      | 20.05      |
| Serbia             | Europe    | -                   | Sava          | Danube      | G1765     | DFO       | 166         | -                           | 76398                     | 44.954   | 19.395   | 44.95      | 19.45      |
| Serbia             | Europe    | -                   | -             | -           | G3814     | Synthetic | -           | -                           | 149982                    | -        | -        | 45.25      | 20.25      |
| Serbia             | Europe    | -                   | -             | -           | G3817     | Synthetic | -           | -                           | 262885                    | -        | -        | 45.15      | 20.15      |
| Serbia             | Europe    | -                   | -             | -           | G3824     | Synthetic | -           | -                           | 17265                     | -        | -        | 44.95      | 20.55      |
| Serbia             | Europe    | -                   | -             | -           | G3828     | Synthetic | -           | -                           | 498471                    | -        | -        | 44.85      | 20.55      |
| Serbia             | Europe    | -                   | -             | -           | G3831     | Synthetic | -           | -                           | 19180                     | -        | -        | 44.75      | 19.35      |
| Serbia             | Europe    | -                   | -             | -           | G3862     | Synthetic | -           | -                           | 16144                     | -        | -        | 43.65      | 21.45      |
| Serbia             | Europe    | -                   | -             | -           | G3868     | Synthetic | -           | -                           | 14686                     | -        | -        | 43.55      | 21.25      |
| Slovakia           | Europe    | Moravsky Jan        | Morava        | Danube      | G0449     | GRDC      | 6142150     | 24129                       | 24571                     | 48.602   | 16.938   | 48.65      | 16.95      |
| Slovakia           | Europe    | Streda Nad Bodrogom | Bodrog        | Danube      | G0460     | GRDC      | 6144200     | 11474                       | 9377                      | 48.396   | 21.750   | 48.35      | 21.65      |
| Slovakia           | Europe    | Sala                | Vah           | Danube      | G0469     | GRDC      | 6142620     | 11218                       | 11335                     | 48.161   | 17.883   | 48.15      | 17.85      |
| Slovakia           | Europe    | Bratislava          | Danube        | Danube      | G0471     | GRDC      | 6142200     | 131331                      | 133826                    | 48.140   | 17.109   | 48.15      | 17.15      |
| Slovakia           | Europe    | -                   | -             | -           | G3649     | Synthetic | -           | -                           | 27248                     | -        | -        | 48.25      | 16.95      |
| Slovenia           | Europe    | Gornja Radgona 1    | Mur           | Danube      | G0530     | GRDC      | 6546610     | 10197                       | 11050                     | 46.681   | 15.995   | 46.65      | 15.95      |
| Slovenia           | Europe    | Borl React 6546801  | Drava         | Danube      | G0545     | GRDC      | 6546802     | 14662                       | 15624                     | 46.371   | 15.996   | 46.35      | 16.05      |



| Country  | Continent | Station Name            | River Name      | River Basin    | GloFAS ID | Provider  | Provider ID | Catchment Area Provided km² | Catchment Area GloFAS km² | LAT Prov | LON Prov | LAT GloFAS | LON GloFAS |
|----------|-----------|-------------------------|-----------------|----------------|-----------|-----------|-------------|-----------------------------|---------------------------|----------|----------|------------|------------|
| Slovenia | Europe    | Catez I                 | Sava            | Danube         | G0564     | GRDC      | 6545050     | 10186                       | 8807                      | 45.893   | 15.609   | 45.85      | 15.65      |
| Spain    | Europe    | Seguraenbeniel          | Segura          | -              | G1570     | CEDEX     | -           | 13478                       | 13556                     | 38.05    | -1       | 38.05      | -1.05      |
| Spain    | Europe    | Guadianaenazuddebadajo  | Guadiana        | Guadiana       | G1571     | CEDEX     | -           | 48530                       | 50300                     | 38.86    | -7.01    | 38.85      | -7.05      |
| Spain    | Europe    | Guadianaenvillanuevadel | Guadiana        | Guadiana       | G1572     | CEDEX     | -           | 34771                       | 37258                     | 38.97    | -5.64    | 39.05      | -5.75      |
| Spain    | Europe    | Guadianaenluciana       | Guadiana        | Guadiana       | G1573     | CEDEX     | -           | 21072                       | 21982                     | 38.99    | -4.31    | 38.95      | -4.35      |
| Spain    | Europe    | Jucarenhuertomulet      | Jucar           | -              | G1574     | CEDEX     | -           | 21497                       | 21652                     | 39.19    | -0.41    | 39.15      | -0.45      |
| Spain    | Europe    | Jucarenalcaladeljucar   | Jucar           | -              | G1575     | CEDEX     | -           | 10785                       | 10734                     | 39.2     | -1.42    | 39.15      | -1.45      |
| Spain    | Europe    | Tajoenlaportusa         | Tajo            | Tejo           | G1576     | CEDEX     | -           | 27159                       | 27417                     | 39.85    | -4.23    | 39.85      | -4.25      |
| Spain    | Europe    | Ebroentortosa           | Ebro            | Ebro           | G1577     | CEDEX     | -           | 84230                       | 85737                     | 40.82    | -0.52    | 40.85      | -0.55      |
| Spain    | Europe    | Segreenseiros           | Segre           | Ebro           | G1578     | CEDEX     | -           | 12782                       | 12742                     | 41.45    | -0.42    | 41.45      | -0.45      |
| Spain    | Europe    | Dueroenvillamarciel     | Duero           | Douro          | G1579     | CEDEX     | -           | 36570                       | 37009                     | 41.51    | -4.93    | 41.55      | -4.85      |
| Spain    | Europe    | Dueronenzamora          | Duero           | Douro          | G1580     | CEDEX     | -           | 46137                       | 46293                     | 41.52    | -5.72    | 41.45      | -5.75      |
| Spain    | Europe    | Dueroenherreradeduero   | Duero           | Douro          | G1581     | CEDEX     | -           | 12740                       | 12742                     | 41.57    | -4.67    | 41.55      | -4.65      |
| Spain    | Europe    | Ebroenzaragoza          | Ebro            | Ebro           | G1582     | CEDEX     | -           | 40434                       | 41134                     | 41.66    | -0.88    | 41.65      | -0.95      |
| Spain    | Europe    | Ebroencastejon          | Ebro            | Ebro           | G1583     | CEDEX     | -           | 25194                       | 26305                     | 42.18    | -1.69    | 42.15      | -1.65      |
| Spain    | Europe    | -                       | -               | -              | G3894     | Synthetic | -           | -                           | 15318                     | -        | -        | 42.25      | -1.85      |
| Spain    | Europe    | -                       | -               | -              | G3903     | Synthetic | -           | -                           | 9707                      | -        | -        | 41.65      | -1.25      |
| Spain    | Europe    | -                       | -               | -              | G3906     | Synthetic | -           | -                           | 16477                     | -        | -        | 41.55      | -5.95      |
| Spain    | Europe    | -                       | -               | -              | G3913     | Synthetic | -           | -                           | 58611                     | -        | -        | 41.35      | -0.25      |
| Sweden   | Europe    | Kallio 2                | Muonioaelven    | Muonio         | G0038     | GRDC      | 6233901     | 14477                       | 14228                     | 67.22    | 23.54    | 67.25      | 23.55      |
| Sweden   | Europe    | Raektfors               | Kalixaelven     | Kalixaelven    | G0049     | GRDC      | 6233850     | 23103                       | 10996                     | 66.17    | 22.82    | 66.15      | 22.85      |
| Sweden   | Europe    | Kukkolankoski Oevre     | Torneaelven     | Muonio         | G0052     | GRDC      | 6233910     | 33930                       | 60223                     | 65.98    | 24.06    | 65.95      | 24.05      |
| Sweden   | Europe    | Bodens Krv Vattenverk   | Luleaelven      | Lule           | G0056     | GRDC      | 6233750     | 24924                       | 27235                     | 65.81    | 21.67    | 65.85      | 21.65      |
| Sweden   | Europe    | Sikfors Krv             | Piteaelven      | Lule           | G0061     | GRDC      | 6233710     | 10816                       | 12829                     | 65.53    | 21.21    | 65.55      | 21.15      |
| Sweden   | Europe    | Kvistforsens Krv        | Skellefteaelven | -              | G0078     | GRDC      | 6233690     | 11309                       | 5764                      | 64.74    | 20.86    | 64.75      | 20.85      |
| Sweden   | Europe    | Stornorrfor Krv         | Umeaelven       | -              | G0094     | GRDC      | 6233502     | 26568                       | 33622                     | 63.85    | 20.05    | 64.15      | 19.75      |
| Sweden   | Europe    | Umeae                   | Umeaelven       | -              | G0096     | GRDC      | 6233501     | -                           | 35172                     | 63.833   | 20.25    | 63.85      | 20.15      |
| Sweden   | Europe    | Solleftea Krv           | Angermanaelven  | Angerman       | G0102     | GRDC      | 6233650     | 30638                       | 33380                     | 63.17    | 17.27    | 63.15      | 17.25      |
| Sweden   | Europe    | Bergeforsens Krv        | Indalsaelven    | -              | G0114     | GRDC      | 6233401     | 25761                       | 30819                     | 62.52    | 17.39    | 62.55      | 17.25      |
| Sweden   | Europe    | Skallboele Krv          | Ljungan         | -              | G0117     | GRDC      | 6233551     | 12088                       | 8748                      | 62.36    | 16.96    | 62.35      | 16.95      |
| Sweden   | Europe    | Ljusne Stroemmar Krv    | Ljusnan         | -              | G0139     | GRDC      | 6233221     | 19817                       | 21697                     | 61.21    | 17.08    | 61.25      | 16.95      |
| Sweden   | Europe    | Aelvkarleby Krv         | Dalaaelven      | -              | G0153     | GRDC      | 6233201     | 28920                       | 29550                     | 60.56    | 17.44    | 60.55      | 17.45      |
| Sweden   | Europe    | Oevre Stockholm         | Maelaren        | -              | G0175     | GRDC      | 6233410     | 22639                       | 24518                     | 59.3     | 18.08    | 59.45      | 18.05      |
| Sweden   | Europe    | Holmen                  | Motala Stroem   | Lake Vattern   | G0188     | GRDC      | 6233301     | 15384                       | 16428                     | 58.59    | 16.17    | 58.55      | 16.05      |
| Sweden   | Europe    | Vargoens Krv            | Goeta Aelv      | Vaernern Goeta | G0193     | GRDC      | 6229500     | 46886                       | 49964                     | 58.36    | 12.37    | 58.45      | 12.45      |
| Sweden   | Europe    | -                       | -               | -              | G2241     | Synthetic | -           | -                           | 5308                      | -        | -        | 67.65      | 22.25      |
| Sweden   | Europe    | -                       | -               | -              | G2246     | Synthetic | -           | -                           | 10380                     | -        | -        | 67.55      | 22.05      |
| Sweden   | Europe    | -                       | -               | -              | G2250     | Synthetic | -           | -                           | 16197                     | -        | -        | 67.45      | 22.35      |
| Sweden   | Europe    | -                       | -               | -              | G2253     | Synthetic | -           | -                           | 6894                      | -        | -        | 67.35      | 22.25      |

| Country     | Continent | Station Name            | River Name | River Basin | GloFAS ID | Provider  | Provider ID | Catchment Area Provided km² | Catchment Area GloFAS km² | LAT Prov | LON Prov | LAT GloFAS | LON GloFAS |
|-------------|-----------|-------------------------|------------|-------------|-----------|-----------|-------------|-----------------------------|---------------------------|----------|----------|------------|------------|
| Sweden      | Europe    | -                       | -          | -           | G2322     | Synthetic | -           | -                           | 12327                     | -        | -        | 66.55      | 20.45      |
| Sweden      | Europe    | -                       | -          | -           | G2336     | Synthetic | -           | -                           | 10743                     | -        | -        | 66.45      | 20.45      |
| Sweden      | Europe    | -                       | -          | -           | G2448     | Synthetic | -           | -                           | 7363                      | -        | -        | 65.35      | 17.95      |
| Sweden      | Europe    | -                       | -          | -           | G2457     | Synthetic | -           | -                           | 9885                      | -        | -        | 65.25      | 17.95      |
| Sweden      | Europe    | -                       | -          | -           | G2600     | Synthetic | -           | -                           | 7536                      | -        | -        | 63.75      | 16.45      |
| Sweden      | Europe    | -                       | -          | -           | G2619     | Synthetic | -           | -                           | 8581                      | -        | -        | 63.65      | 16.35      |
| Sweden      | Europe    | -                       | -          | -           | G2630     | Synthetic | -           | -                           | 13626                     | -        | -        | 63.55      | 16.75      |
| Sweden      | Europe    | -                       | -          | -           | G2646     | Synthetic | -           | -                           | 16467                     | -        | -        | 63.45      | 16.75      |
| Sweden      | Europe    | -                       | -          | -           | G2881     | Synthetic | -           | -                           | 12852                     | -        | -        | 60.65      | 15.05      |
| Sweden      | Europe    | -                       | -          | -           | G2887     | Synthetic | -           | -                           | 8929                      | -        | -        | 60.55      | 14.95      |
| Switzerland | Europe    | Neuhausen               | Rhine      | Rhine       | G0493     | GRDC      | 6935055     | 11887                       | 11976                     | 47.682   | 8.6259   | 47.65      | 8.65       |
| Switzerland | Europe    | Rekingen                | Rhine      | Rhine       | G0499     | GRDC      | 6935054     | 14718                       | 14703                     | 47.570   | 8.33     | 47.55      | 8.35       |
| Switzerland | Europe    | Rheinfelden Messstation | Rhine      | Rhine       | G0501     | GRDC      | 6935053     | 34526                       | 35316                     | 47.560   | 7.7999   | 47.55      | 7.75       |
| Switzerland | Europe    | Basel Schiffaende       | Rhine      | Rhine       | G0502     | GRDC      | 6935052     | 35905                       | 37104                     | 47.559   | 7.5884   | 47.55      | 7.55       |
| Switzerland | Europe    | Basel Rheinhalle        | Rhine      | Rhine       | G0503     | GRDC      | 6935051     | 35897                       | 37104                     | 47.559   | 7.5167   | 47.55      | 7.55       |
| Switzerland | Europe    | Untersiggenthal Stilli  | Aare       | Rhine       | G0506     | GRDC      | 6935300     | 17601                       | 18237                     | 47.516   | 8.2348   | 47.55      | 8.25       |
| Switzerland | Europe    | Brugg                   | Aare       | Rhine       | G0507     | GRDC      | 6935301     | 11726                       | 11970                     | 47.482   | 8.1949   | 47.45      | 8.15       |
| Switzerland | Europe    | Murgenthal              | Aare       | Rhine       | G0514     | GRDC      | 6935302     | 10119                       | 10174                     | 47.266   | 7.8306   | 47.25      | 7.75       |
| Turkey      | Europe    | Meric Koep              | Maritsa    | -           | G0698     | GRDC      | 6665100     | 27251                       | 27081                     | 41.192   | 26.417   | 41.65      | 26.45      |
| Ukraine     | Europe    | Dnepr Power Plant       | Dnepr      | Dniepr      | G0483     | GRDC      | 6980800     | 463000                      | 481508                    | 47.92    | 35.15    | 47.95      | 35.05      |
| Ukraine     | Europe    | Kakhovskoye             | Dnepr      | Dniepr      | G0528     | GRDC      | 6980802     | 482000                      | 502101                    | 46.77    | 33.18    | 46.75      | 33.15      |
| Ukraine     | Europe    | -                       | -          | -           | G3417     | Synthetic | -           | -                           | 43208                     | -        | -        | 51.95      | 30.85      |
| Ukraine     | Europe    | -                       | -          | -           | G3440     | Synthetic | -           | -                           | 8569                      | -        | -        | 51.65      | 31.55      |
| Ukraine     | Europe    | -                       | -          | -           | G3448     | Synthetic | -           | -                           | 12242                     | -        | -        | 51.55      | 26.55      |
| Ukraine     | Europe    | -                       | -          | -           | G3449     | Synthetic | -           | -                           | 13790                     | -        | -        | 51.55      | 26.65      |
| Ukraine     | Europe    | -                       | -          | -           | G3450     | Synthetic | -           | -                           | 72493                     | -        | -        | 51.55      | 31.65      |
| Ukraine     | Europe    | -                       | -          | -           | G3451     | Synthetic | -           | -                           | 38726                     | -        | -        | 51.55      | 32.65      |
| Ukraine     | Europe    | -                       | -          | -           | G3456     | Synthetic | -           | -                           | 28242                     | -        | -        | 51.45      | 32.65      |
| Ukraine     | Europe    | -                       | -          | -           | G3463     | Synthetic | -           | -                           | 114017                    | -        | -        | 51.35      | 30.15      |
| Ukraine     | Europe    | -                       | -          | -           | G3469     | Synthetic | -           | -                           | 8351                      | -        | -        | 51.25      | 30.15      |
| Ukraine     | Europe    | -                       | -          | -           | G3470     | Synthetic | -           | -                           | 123631                    | -        | -        | 51.25      | 30.35      |
| Ukraine     | Europe    | -                       | -          | -           | G3471     | Synthetic | -           | -                           | 108946                    | -        | -        | 51.25      | 30.55      |
| Ukraine     | Europe    | -                       | -          | -           | G3484     | Synthetic | -           | -                           | 15238                     | -        | -        | 51.05      | 30.35      |
| Ukraine     | Europe    | -                       | -          | -           | G3505     | Synthetic | -           | -                           | 90198                     | -        | -        | 50.55      | 30.65      |
| Ukraine     | Europe    | -                       | -          | -           | G3556     | Synthetic | -           | -                           | 351738                    | -        | -        | 49.75      | 31.45      |
| Ukraine     | Europe    | -                       | -          | -           | G3562     | Synthetic | -           | -                           | 12851                     | -        | -        | 49.65      | 31.45      |
| Ukraine     | Europe    | -                       | -          | -           | G3600     | Synthetic | -           | -                           | 14573                     | -        | -        | 49.15      | 37.45      |
| Ukraine     | Europe    | -                       | -          | -           | G3606     | Synthetic | -           | -                           | 399280                    | -        | -        | 49.05      | 33.45      |
| Ukraine     | Europe    | -                       | -          | -           | G3607     | Synthetic | -           | -                           | 23470                     | -        | -        | 49.05      | 33.55      |

| Country        | Continent | Station Name       | River Name | River Basin | GloFAS ID | Provider  | Provider ID | Catchment Area Provided km <sup>2</sup> | Catchment Area GloFAS km <sup>2</sup> | LAT Prov | LON Prov | LAT GloFAS | LON GloFAS |
|----------------|-----------|--------------------|------------|-------------|-----------|-----------|-------------|-----------------------------------------|---------------------------------------|----------|----------|------------|------------|
| Ukraine        | Europe    | -                  | -          | -           | G3608     | Synthetic | -           | -                                       | 23582                                 | -        | -        | 49.05      | 37.35      |
| Ukraine        | Europe    | -                  | -          | -           | G3616     | Synthetic | -           | -                                       | 14701                                 | -        | -        | 48.95      | 34.15      |
| Ukraine        | Europe    | -                  | -          | -           | G3622     | Synthetic | -           | -                                       | 424409                                | -        | -        | 48.85      | 33.95      |
| Ukraine        | Europe    | -                  | -          | -           | G3628     | Synthetic | -           | -                                       | 440443                                | -        | -        | 48.75      | 34.15      |
| Ukraine        | Europe    | -                  | -          | -           | G3629     | Synthetic | -           | -                                       | 10234                                 | -        | -        | 48.75      | 34.35      |
| Ukraine        | Europe    | -                  | -          | -           | G3633     | Synthetic | -           | -                                       | 54328                                 | -        | -        | 48.65      | 39.15      |
| Ukraine        | Europe    | -                  | -          | -           | G3640     | Synthetic | -           | -                                       | 14540                                 | -        | -        | 48.45      | 22.25      |
| Ukraine        | Europe    | -                  | -          | -           | G3641     | Synthetic | -           | -                                       | 453178                                | -        | -        | 48.45      | 34.95      |
| Ukraine        | Europe    | -                  | -          | -           | G3642     | Synthetic | -           | -                                       | 23623                                 | -        | -        | 48.45      | 35.15      |
| Ukraine        | Europe    | -                  | -          | -           | G3643     | Synthetic | -           | -                                       | 21845                                 | -        | -        | 48.35      | 22.25      |
| Ukraine        | Europe    | -                  | -          | -           | G3659     | Synthetic | -           | -                                       | 16808                                 | -        | -        | 48.15      | 30.75      |
| Ukraine        | Europe    | -                  | -          | -           | G3666     | Synthetic | -           | -                                       | 25204                                 | -        | -        | 48.05      | 30.75      |
| Ukraine        | Europe    | -                  | -          | -           | G3708     | Synthetic | -           | -                                       | 54394                                 | -        | -        | 47.05      | 31.85      |
| Ukraine        | Europe    | -                  | -          | -           | G3713     | Synthetic | -           | -                                       | 9528                                  | -        | -        | 46.95      | 32.05      |
| Ukraine        | Europe    | -                  | -          | -           | G3725     | Synthetic | -           | -                                       | 15008                                 | -        | -        | 46.75      | 32.75      |
| United Kingdom | Europe    | Kingston On Thames | Thames     | Thames      | G1602     | EFAS/GR   | 6607650     | 9948                                    | 9926                                  | 51.414   | -0.307   | 51.35      | -0.45      |
| United Kingdom | Europe    | -                  | Thames     | Thames      | G1834     | DFO       | 711         | -                                       | 943                                   | 51.704   | -1.664   | 51.65      | -1.65      |
| United Kingdom | Europe    | -                  | -          | -           | G3329     | Synthetic | -           | -                                       | 8137                                  | -        | -        | 53.65      | -0.85      |
| United Kingdom | Europe    | -                  | -          | -           | G3337     | Synthetic | -           | -                                       | 13506                                 | -        | -        | 53.55      | -0.75      |

Table 5: GloFAS diagnostic points for North America.

| Country | Continent     | Station Name         | River Name | River Basin | GloFAS ID | Provider | Provider ID | Catchment Area Provided km <sup>2</sup> | Catchment Area GloFAS km <sup>2</sup> | LAT Prov | LON Prov | LAT GloFAS | LON GloFAS |
|---------|---------------|----------------------|------------|-------------|-----------|----------|-------------|-----------------------------------------|---------------------------------------|----------|----------|------------|------------|
| Canada  | North America | Below Carnwath River | Anderson   | Anderson    | G0017     | GRDC     | 4209150     | 56300                                   | 63636                                 | 68.632   | -        | 68.45      | -          |
| Canada  | North America | Below Andrew River   | Carnwath   | Anderson    | G0021     | GRDC     | 4209155     | 21500                                   | 20588                                 | 68.393   | -        | 68.35      | -          |
| Canada  | North America | Inuvik East Channel  | Mackenzie  | Mackenzie   | G0022     | GRDC     | 4208020     | -                                       | 1843                                  | 68.374   | -        | 68.15      | -          |
| Canada  | North America | Above Bloody Falls   | Coppermine | Coppermine  | G0025     | GRDC     | 4209402     | 50700                                   | 45051                                 | 67.74    | -        | 67.75      | -          |
| Canada  | North America | Near The Mouth       | Ellice     | -           | G0026     | GRDC     | 4209600     | 16900                                   | 16824                                 | 67.708   | -        | 67.55      | -          |
| Canada  | North America | Near The Mouth       | Old Crow   | Yukon       | G0027     | GRDC     | 4203060     | 13900                                   | 8603                                  | 67.634   | -        | 67.65      | -          |
| Canada  | North America | Old Crow             | Porcupine  | Yukon       | G0029     | GRDC     | 4203050     | 55400                                   | 57982                                 | 67.563   | -        | 67.55      | -          |
| Canada  | North America | Above Chantrey Inlet | Hayes      | Hayes       | G0030     | GRDC     | 4209850     | 18100                                   | 18751                                 | 67.525   | -        | 67.35      | -93.65     |
| Canada  | North America | Arctic Red River     | Mackenzie  | Mackenzie   | G0032     | GRDC     | 4208025     | 1660000                                 | 1726490                               | 67.458   | -        | 67.45      | -          |
| Canada  | North America | Below Bell River     | Porcupine  | Yukon       | G0033     | GRDC     | 4203051     | 36000                                   | 37346                                 | 67.440   | -        | 67.35      | -          |
| Canada  | North America | Above Fort Mcpherson | Peel       | Mackenzie   | G0036     | GRDC     | 4208040     | 70600                                   | 69434                                 | 67.248   | -        | 66.85      | -          |
| Canada  | North America | Above Copper Creek   | Coppermine | Coppermine  | G0037     | GRDC     | 4209401     | 46800                                   | 45051                                 | 67.228   | -        | 67.75      | -          |
| Canada  | North America | Near The Mouth       | Arctic Red | Mackenzie   | G0042     | GRDC     | 4208065     | 18600                                   | 18214                                 | 66.79    | -        | 66.65      | -          |
| Canada  | North America | Near The Mouth       | Burnside   | -           | G0045     | GRDC     | 4209550     | 16800                                   | 12258                                 | 66.733   | -        | 66.85      | -          |

| Country | Continent     | Station Name              | River Name    | River Basin | GloFAS ID | Provider | Provider ID | Catchment Area Provided km² | Catchment Area GloFAS km² | LAT Prov | LON Prov | LAT GloFAS | LON GloFAS |
|---------|---------------|---------------------------|---------------|-------------|-----------|----------|-------------|-----------------------------|---------------------------|----------|----------|------------|------------|
| Canada  | North America | Above Hermann River       | Back          | Back        | G0050     | GRDC     | 4209805     | 93900                       | 94891                     | 66.086   | -        | 65.65      | -          |
| Canada  | North America | Below Deep Rose Lake      | Back          | Back        | G0051     | GRDC     | 4209800     | 98200                       | 98520                     | 66.08    | -96.5    | 65.75      | -          |
| Canada  | North America | Above Canyon Creek        | Peel          | Mackenzie   | G0053     | GRDC     | 4208041     | 25700                       | 26542                     | 65.894   | -        | 65.85      | -          |
| Canada  | North America | Outlet Of Clut Lake       | Camsell       | Mackenzie   | G0060     | GRDC     | 4208168     | 31100                       | 30420                     | 65.597   | -        | 63.75      | -          |
| Canada  | North America | Outlet Of Point Lake      | Coppermine    | Coppermine  | G0064     | GRDC     | 4209400     | 19300                       | 7251                      | 65.414   | -        | 65.75      | -          |
| Canada  | North America | Norman Wells              | Mackenzie     | Mackenzie   | G0066     | GRDC     | 4208150     | 1570000                     | 1629470                   | 65.273   | -        | 64.85      | -          |
| Canada  | North America | Below Cambrian Creek      | Mountain      | Mackenzie   | G0067     | GRDC     | 4208120     | 11100                       | 10940                     | 65.228   | -        | 65.05      | -          |
| Canada  | North America | Below Beechy Lake         | Back          | Back        | G0068     | GRDC     | 4209806     | 19600                       | 68073                     | 65.187   | -        | 65.25      | -          |
| Canada  | North America | Outlet Of Great Bear Lake | Great Bear    | Mackenzie   | G0069     | GRDC     | 4208160     | 145000                      | 147702                    | 65.134   | -        | 64.95      | -          |
| Canada  | North America | Near The Mouth            | Baillie       | Back        | G0072     | GRDC     | 4209810     | 14500                       | 14719                     | 65.010   | -        | 65.05      | -          |
| Canada  | North America | Eagle                     | Yukon         | Yukon       | G0075     | GRDC     | 4203201     | 294000                      | 300774                    | 64.789   | -        | 64.55      | -          |
| Canada  | North America | Below Outlet Of Schultz   | Thelon        | Thelon      | G0077     | GRDC     | 4214051     | 152000                      | 177805                    | 64.778   | -        | 64.75      | -96.95     |
| Canada  | North America | Above Lac Ste Therese     | Johnny Hoe    | Mackenzie   | G0081     | GRDC     | 4208170     | 17300                       | 17404                     | 64.567   | -        | 64.75      | -          |
| Canada  | North America | Above Beverly Lake        | Thelon        | Thelon      | G0083     | GRDC     | 4214050     | 65300                       | 65979                     | 64.530   | -        | 64.45      | -          |
| Canada  | North America | Near The Mouth            | Fortymile     | Yukon       | G0084     | GRDC     | 4203820     | 16600                       | 16590                     | 64.397   | -        | 64.35      | -          |
| Canada  | North America | Above St Clair Falls      | Quoich        | Quoich      | G0085     | GRDC     | 4214100     | 30100                       | 30046                     | 64.314   | -        | 64.25      | -93.85     |
| Canada  | North America | Outlet Of Marjorie Lake   | Dubawnt       | Thelon      | G0087     | GRDC     | 4214010     | 67300                       | 82372                     | 64.263   | -        | 64.25      | -99.55     |
| Canada  | North America | Below Ghost River         | Snare         | Mackenzie   | G0090     | GRDC     | 4208357     | 13300                       | 13526                     | 63.974   | -        | 63.75      | -          |
| Canada  | North America | Km 63 Above Mouth         | Redstone      | Mackenzie   | G0092     | GRDC     | 4208311     | 15400                       | 15831                     | 63.925   | -        | 63.85      | -          |
| Canada  | North America | Near The Mouth            | Blackwater    | Mackenzie   | G0093     | GRDC     | 4208180     | 10400                       | 10434                     | 63.92    | -        | 62.45      | -          |
| Canada  | North America | Above Kazan Falls         | Kazan         | Thelon      | G0097     | GRDC     | 4214090     | 72300                       | 44259                     | 63.652   | -        | 63.75      | -95.85     |
| Canada  | North America | Above Fraser Falls        | Stewart       | Yukon       | G0098     | GRDC     | 4203160     | 30588                       | 30921                     | 63.488   | -        | 63.45      | -          |
| Canada  | North America | At The Mouth              | Stewart       | Yukon       | G0101     | GRDC     | 4203152     | 51000                       | 51155                     | 63.281   | -        | 63.25      | -          |
| Canada  | North America | Below Outlet Of Lac La    | La Martre     | Mackenzie   | G0103     | GRDC     | 4208350     | 13900                       | 13836                     | 63.108   | -        | 63.35      | -          |
| Canada  | North America | Above White River         | Yukon         | Yukon       | G0104     | GRDC     | 4203250     | 149961                      | 150405                    | 63.083   | -        | 62.85      | -          |
| Canada  | North America | Outlet Of Artillery Lake  | Lockhart      | Mackenzie   | G0105     | GRDC     | 4208410     | 26600                       | 3582                      | 62.894   | -        | 62.95      | -          |
| Canada  | North America | Near The Mouth            | Macmillan     | Yukon       | G0106     | GRDC     | 4203530     | 13800                       | 13819                     | 62.893   | -        | 62.85      | -          |
| Canada  | North America | Pelly Crossing            | Pelly         | Yukon       | G0107     | GRDC     | 4203500     | 49000                       | 50090                     | 62.829   | -        | 62.85      | -          |
| Canada  | North America | Inlet To Prosperous Lake  | Yellowknife   | Mackenzie   | G0110     | GRDC     | 4208371     | 11300                       | 12688                     | 62.670   | -        | 62.75      | -          |
| Canada  | North America | Above Metahdali Creek     | Willowlake    | Mackenzie   | G0111     | GRDC     | 4208386     | 20200                       | 20388                     | 62.650   | -122.9   | 62.65      | -          |
| Canada  | North America | Outlet Of Prosperous Lake | Yellowknife   | Mackenzie   | G0112     | GRDC     | 4208370     | 16300                       | 17682                     | 62.545   | -        | 62.45      | -          |
| Canada  | North America | Below O Neil Lake         | Ferguson      | Ferguson    | G0115     | GRDC     | 4214075     | 12400                       | 8461                      | 62.471   | -        | 62.45      | -95.05     |
| Canada  | North America | Below Vangorda Creek      | Pelly         | Yukon       | G0119     | GRDC     | 4203501     | 22100                       | 22676                     | 62.222   | -        | 62.05      | -          |
| Canada  | North America | Carmacks                  | Yukon         | Yukon       | G0121     | GRDC     | 4203400     | 81800                       | 81392                     | 62.095   | -        | 62.05      | -          |
| Canada  | North America | Below Kluane River        | Donjek        | Yukon       | G0122     | GRDC     | 4203320     | 12400                       | 14837                     | 62.082   | -        | 61.85      | -          |
| Canada  | North America | Fort Simpson              | Mackenzie     | Mackenzie   | G0125     | GRDC     | 4208005     | 1270000                     | 1356040                   | 61.868   | -        | 61.85      | -          |
| Canada  | North America | Near The Mouth            | Liard         | Mackenzie   | G0127     | GRDC     | 4208271     | 275000                      | 276836                    | 61.747   | -        | 61.05      | -          |
| Canada  | North America | Above Virginia Falls      | South Nahanni | Mackenzie   | G0128     | GRDC     | 4208221     | 14600                       | 15387                     | 61.635   | -        | 61.85      | -          |
| Canada  | North America | Above Frank Creek         | Yukon         | Yukon       | G0132     | GRDC     | 4203900     | 30821                       | 30905                     | 61.434   | -        | 60.95      | -          |

| Country | Continent     | Station Name           | River Name           | River Basin       | GloFAS ID | Provider | Provider ID | Catchment Area Provided km² | Catchment Area GloFAS km² | LAT Prov | LON Prov | LAT GloFAS | LON GloFAS |
|---------|---------------|------------------------|----------------------|-------------------|-----------|----------|-------------|-----------------------------|---------------------------|----------|----------|------------|------------|
| Canada  | North America | Above Clausen Creek    | South Nahanni        | Mackenzie         | G0135     | GRDC     | 4208220     | 33400                       | 33813                     | 61.263   | -        | 61.25      | -          |
| Canada  | North America | Near Fort Providence   | Mackenzie            | Mackenzie         | G0136     | GRDC     | 4208300     | 970000                      | 1022770                   | 61.260   | -        | 61.25      | -          |
| Canada  | North America | Outlet Of Ennadai Lake | Kazan                | Thelon            | G0137     | GRDC     | 4214091     | 21400                       | 8008                      | 61.253   | -        | 61.25      | -          |
| Canada  | North America | Outlet Of Kakisa Lake  | Kakisa               | Mackenzie         | G0143     | GRDC     | 4208477     | 15600                       | 14409                     | 60.940   | -        | 60.95      | -          |
| Canada  | North America | Above Outlet Sealhole  | Thlewiaza            | Thlewiaza         | G0146     | GRDC     | 4214070     | 27000                       | 49795                     | 60.785   | -        | 60.75      | -98.75     |
| Canada  | North America | Near Hay River         | Hay                  | Mackenzie         | G0147     | GRDC     | 4208440     | 52300                       | 52476                     | 60.743   | -        | 60.45      | -          |
| Canada  | North America | Whitehorse             | Yukon                | Yukon             | G0148     | GRDC     | 4203901     | 19400                       | 21098                     | 60.713   | -        | 60.55      | -          |
| Canada  | North America | Highway No5            | Buffalo              | Mackenzie         | G0149     | GRDC     | 4208470     | 18500                       | 13136                     | 60.712   | -        | 60.85      | -          |
| Canada  | North America | Outlet Of Tsu Lake     | Taltson              | Mackenzie         | G0152     | GRDC     | 4208420     | 58700                       | 40559                     | 60.649   | -        | 60.45      | -          |
| Canada  | North America | Near Teslin            | Teslin               | Yukon             | G0154     | GRDC     | 4203770     | 30300                       | 25881                     | 60.484   | -        | 61.45      | -          |
| Canada  | North America | Near Watson Lake       | Frances              | Mackenzie         | G0156     | GRDC     | 4208290     | 12800                       | 12811                     | 60.473   | -        | 60.45      | -          |
| Canada  | North America | Fort Liard             | Liard                | Mackenzie         | G0158     | GRDC     | 4208280     | 222000                      | 226980                    | 60.243   | -        | 60.25      | -          |
| Canada  | North America | Above Bates River      | Alsek                | Alsek             | G0159     | GRDC     | 4202100     | 16200                       | 16636                     | 60.119   | -        | 60.05      | -          |
| Canada  | North America | Upper Crossing         | Liard                | Mackenzie         | G0160     | GRDC     | 4208275     | 33400                       | 33269                     | 60.05    | -128.9   | 60.05      | -          |
| Canada  | North America | Fitzgerald Alberta     | Slave                | Mackenzie         | G0162     | GRDC     | 4208400     | 606000                      | 628620                    | 59.872   | -        | 59.05      | -          |
| Canada  | North America | Near The Mouth         | Dease                | Mackenzie         | G0163     | GRDC     | 4208252     | 14500                       | 14818                     | 59.858   | -        | 59.75      | -          |
| Canada  | North America | Above Beaver River     | Liard                | Mackenzie         | G0165     | GRDC     | 4208272     | 119000                      | 120254                    | 59.742   | -        | 59.45      | -          |
| Canada  | North America | Above Kechika River    | Liard                | Mackenzie         | G0167     | GRDC     | 4208274     | 61600                       | 61745                     | 59.701   | -        | 59.95      | -          |
| Canada  | North America | At The Mouth           | Kechika              | Mackenzie         | G0169     | GRDC     | 4208255     | 22700                       | 22640                     | 59.615   | -        | 59.55      | -          |
| Canada  | North America | Lower Crossing         | Liard                | Mackenzie         | G0171     | GRDC     | 4208270     | 104000                      | 104615                    | 59.412   | -        | 59.55      | -          |
| Canada  | North America | Near Meander River     | Hay                  | Mackenzie         | G0176     | GRDC     | 4208441     | 36900                       | 37335                     | 59.149   | -        | 59.05      | -          |
| Canada  | North America | Outlet Of Black Lake   | Fond Du Lac          | Mackenzie         | G0177     | GRDC     | 4208971     | 50700                       | 53600                     | 59.147   | -        | 59.25      | -          |
| Canada  | North America | Peace Point Alberta    | Peace                | Mackenzie         | G0178     | GRDC     | 4208450     | 293000                      | 293544                    | 59.113   | -        | 58.35      | -          |
| Canada  | North America | Above Boya Creek       | Kechika              | Mackenzie         | G0179     | GRDC     | 4208256     | 11200                       | 11395                     | 59.098   | -        | 59.15      | -          |
| Canada  | North America | Below Great Island     | Seal                 | Seal              | G0180     | GRDC     | 4214105     | 48100                       | 50129                     | 58.891   | -        | 58.85      | -96.35     |
| Canada  | North America | Outlet Of Wapata Lake  | Cree                 | Mackenzie         | G0181     | GRDC     | 4208975     | 20700                       | 19916                     | 58.858   | -        | 58.85      | -          |
| Canada  | North America | Below Stony Lake       | North Seal River     | Seal              | G0182     | GRDC     | 4214107     | 18400                       | 19812                     | 58.844   | -        | 58.85      | -98.25     |
| Canada  | North America | Near Fort Nelson       | Muskwa               | Mackenzie         | G0183     | GRDC     | 4208360     | 20300                       | 21399                     | 58.788   | -        | 58.85      | -          |
| Canada  | North America | Above Muskwa River     | Fort Nelson          | Mackenzie         | G0184     | GRDC     | 4208365     | 22800                       | 22775                     | 58.670   | -        | 58.85      | -          |
| Canada  | North America | En Aval De La Riviere  | Feuilles             | Feuilles          | G0185     | GRDC     | 4214940     | 41700                       | 43193                     | 58.640   | -        | 58.55      | -70.55     |
| Canada  | North America | Near Tulsequah         | Taku                 | Taku              | G0186     | GRDC     | 4202600     | 15500                       | 16089                     | 58.64    | -        | 58.85      | -          |
| Canada  | North America | Near High Level        | Chinchaga            | Mackenzie         | G0187     | GRDC     | 4208461     | 10400                       | 11173                     | 58.596   | -        | 58.45      | -          |
| Canada  | North America | Near Juneau            | Taku                 | Taku              | G0190     | GRDC     | 4202601     | 17700                       | 17960                     | 58.538   | -133.7   | 58.65      | -          |
| Canada  | North America | Fort Vermilion         | Peace                | Mackenzie         | G0192     | GRDC     | 4208452     | 223000                      | 223602                    | 58.38    | -        | 57.65      | -          |
| Canada  | North America | Embarras Airport       | Athabasca            | Mackenzie         | G0196     | GRDC     | 4208871     | 155000                      | 157988                    | 58.2     | -        | 57.75      | -          |
| Canada  | North America | Above Fox Lake         | South Seal           | Seal              | G0199     | GRDC     | 4214106     | 13000                       | 13102                     | 58.143   | -        | 58.05      | -98.35     |
| Canada  | North America | Above Red Head Rapids  | Churchill            | Churchill         | G0200     | GRDC     | 4214270     | 287000                      | 285707                    | 58.120   | -        | 57.45      | -95.55     |
| Canada  | North America | Telegraph Creek        | Stikine              | Stikine           | G0201     | GRDC     | 4204100     | 29300                       | 30273                     | 57.900   | -        | 58.05      | -          |
| Canada  | North America | Pres De L Embouchure 1 | Grande Riviere De La | Grande Riviere De | G0202     | GRDC     | 4214900     | 29800                       | 29520                     | 57.883   | -        | 57.55      | -67.35     |

| Country | Continent     | Station Name              | River Name             | River Basin          | GloFAS ID | Provider | Provider ID | Catchment Area Provided km² | Catchment Area GloFAS km² | LAT Prov | LON Prov | LAT GloFAS | LON GloFAS |
|---------|---------------|---------------------------|------------------------|----------------------|-----------|----------|-------------|-----------------------------|---------------------------|----------|----------|------------|------------|
| Canada  | North America | Highway No 88             | Wabasca                | Mackenzie            | G0203     | GRDC     | 4208821     | 35800                       | 36210                     | 57.875   | -        | 57.55      | -          |
| Canada  | North America | Pres De La Riviere        | Aux Melezes            | Caniapiscou          | G0210     | GRDC     | 4214035     | 42700                       | 42270                     | 57.67    | -69.62   | 57.65      | -69.65     |
| Canada  | North America | Above Butterfly Creek     | Stikine                | Stikine              | G0211     | GRDC     | 4204050     | 36000                       | 37278                     | 57.486   | -        | 57.65      | -          |
| Canada  | North America | Chute De La Pyrite        | Caniapiscou            | Caniapiscou          | G0212     | GRDC     | 4214040     | 86800                       | 89638                     | 57.43    | -69.25   | 56.85      | -69.05     |
| Canada  | North America | Below Fidler Lake         | Churchill              | Churchill            | G0213     | GRDC     | 4214261     | 271000                      | 283000                    | 57.25    | -        | 57.25      | -96.85     |
| Canada  | North America | Above Akie River          | Finlay                 | Mackenzie            | G0214     | GRDC     | 4208491     | 16000                       | 16024                     | 57.127   | -        | 57.15      | -          |
| Canada  | North America | Below Wathaman Lake       | Wathaman               | Churchill            | G0215     | GRDC     | 4214287     | 10200                       | 10234                     | 57.088   | -        | 57.05      | -          |
| Canada  | North America | Au Lac De La Hutte        | George                 | George               | G0217     | GRDC     | 4214905     | 24200                       | 24966                     | 56.793   | -        | 56.75      | -64.85     |
| Canada  | North America | Below McMurray            | Athabasca              | Mackenzie            | G0218     | GRDC     | 4208730     | 133000                      | 136967                    | 56.780   | -111.4   | 56.75      | -          |
| Canada  | North America | Draper                    | Clearwater             | Mackenzie            | G0220     | GRDC     | 4208880     | 30800                       | 31695                     | 56.685   | -        | 56.65      | -          |
| Canada  | North America | Above Christina River     | Clearwater             | Mackenzie            | G0222     | GRDC     | 4208881     | 17000                       | 17236                     | 56.661   | -        | 56.75      | -          |
| Canada  | North America | Above Leaf Rapids         | Churchill              | Churchill            | G0224     | GRDC     | 4214262     | 244000                      | 243928                    | 56.468   | -        | 56.25      | -          |
| Canada  | North America | Below Gods River          | Hayes                  | Hayes (Trib. Hudson) | G0225     | GRDC     | 4214025     | 103000                      | 107415                    | 56.431   | -        | 56.35      | -92.85     |
| Canada  | North America | Long Spruce Generating    | Nelson                 | Nelson               | G0226     | GRDC     | 4213711     | 1060000                     | 960215                    | 56.397   | -        | 56.45      | -94.25     |
| Canada  | North America | Kettle Generating Station | Nelson                 | Nelson               | G0227     | GRDC     | 4213712     | 1060000                     | 959151                    | 56.380   | -        | 56.35      | -94.65     |
| Canada  | North America | Below Trout River         | Wabasca                | Mackenzie            | G0228     | GRDC     | 4208822     | 14300                       | 15001                     | 56.324   | -        | 56.25      | -          |
| Canada  | North America | Near Fort St John         | Beatton                | Mackenzie            | G0230     | GRDC     | 4208565     | 15600                       | 15641                     | 56.28    | -120.7   | 56.35      | -          |
| Canada  | North America | Peace River               | Peace                  | Mackenzie            | G0232     | GRDC     | 4208630     | 186000                      | 198152                    | 56.244   | -        | 56.15      | -          |
| Canada  | North America | Above Pine River          | Peace                  | Mackenzie            | G0233     | GRDC     | 4208458     | 83900                       | 88746                     | 56.199   | -        | 56.25      | -          |
| Canada  | North America | Above Devil Rapids        | Reindeer               | Churchill            | G0234     | GRDC     | 4214285     | 63300                       | 62815                     | 56.193   | -        | 56.45      | -          |
| Canada  | North America | Above Granville Falls     | Churchill              | Churchill            | G0235     | GRDC     | 4214260     | 228000                      | 227323                    | 56.15    | -        | 55.65      | -          |
| Canada  | North America | Near Taylor               | Peace                  | Mackenzie            | G0236     | GRDC     | 4208457     | 97100                       | 104202                    | 56.135   | -        | 56.15      | -          |
| Canada  | North America | Above Alces River         | Peace                  | Mackenzie            | G0237     | GRDC     | 4208456     | 118000                      | 125886                    | 56.12    | -        | 56.05      | -          |
| Canada  | North America | At Kelsey Generating      | Nelson                 | Nelson               | G0238     | GRDC     | 4213720     | 1010000                     | 954816                    | 56.038   | -        | 56.25      | -95.85     |
| Canada  | North America | Hudson Hope               | Peace                  | Mackenzie            | G0239     | GRDC     | 4208550     | 70200                       | 70260                     | 56.027   | -        | 55.95      | -          |
| Canada  | North America | Near Patuanak             | Churchill              | Churchill            | G0240     | GRDC     | 4214265     | 78700                       | 79526                     | 55.925   | -        | 55.95      | -          |
| Canada  | North America | Dunvegan Bridge           | Peace                  | Mackenzie            | G0241     | GRDC     | 4208455     | 130000                      | 131335                    | 55.919   | -        | 56.15      | -          |
| Canada  | North America | Near Shamattawa           | Gods                   | Hayes (Trib. Hudson) | G0243     | GRDC     | 4214351     | 65500                       | 71010                     | 55.85    | -        | 55.85      | -92.15     |
| Canada  | North America | Near Thompson             | Burntwood              | Nelson               | G0244     | GRDC     | 4213410     | 18500                       | 20803                     | 55.744   | -        | 55.95      | -97.35     |
| Canada  | North America | Above Standing Stone      | Gras                   | Nelson               | G0245     | GRDC     | 4213601     | 15400                       | 15588                     | 55.743   | -97      | 55.75      | -97.05     |
| Canada  | North America | East Pine                 | Pine                   | Mackenzie            | G0246     | GRDC     | 4208570     | 12100                       | 12590                     | 55.72    | -        | 55.75      | -          |
| Canada  | North America | Above Babine River        | Skeena                 | Skeena               | G0247     | GRDC     | 4206920     | 12400                       | 12431                     | 55.716   | -        | 55.85      | -          |
| Canada  | North America | Watino                    | Smoky                  | Mackenzie            | G0248     | GRDC     | 4208640     | 50300                       | 51838                     | 55.715   | -        | 55.65      | -          |
| Canada  | North America | En Amont Du Chenal        | Baleine Petite Riviere | -                    | G0249     | GRDC     | 4214820     | 10400                       | 433                       | 55.684   | -74.34   | 55.65      | -74.35     |
| Canada  | North America | Above Otter Rapids        | Churchill              | Churchill            | G0250     | GRDC     | 4214264     | 119000                      | 120999                    | 55.646   | -        | 55.65      | -          |
| Canada  | North America | Sandy Bay                 | Churchill              | Churchill            | G0252     | GRDC     | 4214263     | 212000                      | 216758                    | 55.523   | -        | 55.55      | -          |
| Canada  | North America | Near Guy                  | Little Smoky           | Mackenzie            | G0254     | GRDC     | 4208645     | 11100                       | 11210                     | 55.456   | -        | 55.45      | -          |
| Canada  | North America | Limestone Rapids          | Severn                 | Severn               | G0255     | GRDC     | 4214440     | 94300                       | 94953                     | 55.375   | -        | 55.45      | -88.15     |
| Canada  | North America | Slave Lake                | Lesser Slave           | Mackenzie            | G0256     | GRDC     | 4208793     | 13600                       | 14439                     | 55.305   | -        | 55.25      | -          |



| Country | Continent     | Station Name            | River Name            | River Basin          | GloFAS ID | Provider | Provider ID | Catchment Area Provided km² | Catchment Area GloFAS km² | LAT Prov | LON Prov | LAT GloFAS | LON GloFAS |
|---------|---------------|-------------------------|-----------------------|----------------------|-----------|----------|-------------|-----------------------------|---------------------------|----------|----------|------------|------------|
| Canada  | North America | Highway No 2A           | Lesser Slave          | Mackenzie            | G0257     | GRDC     | 4208792     | 14400                       | 14439                     | 55.29    | -        | 55.25      | -          |
| Canada  | North America | Above Shumal Creek      | Nass                  | Nass                 | G0258     | GRDC     | 4206100     | 19200                       | 19352                     | 55.263   | -        | 55.25      | -          |
| Canada  | North America | En Amont De La Riviere  | Grande Riviere De La  | Grande Riviere De    | G0259     | GRDC     | 4214801     | 36300                       | 35625                     | 55.237   | -        | 55.25      | -76.95     |
| Canada  | North America | Near Grande Prairie     | Wapiti                | Mackenzie            | G0262     | GRDC     | 4208596     | 11300                       | 11259                     | 55.072   | -        | 55.05      | -          |
| Canada  | North America | Below Allen Rapids      | Gods                  | Hayes (Trib. Hudson  | G0263     | GRDC     | 4214350     | 25900                       | 28744                     | 55.026   | -        | 55.05      | -93.85     |
| Canada  | North America | Sortie Du Lac Bienville | Grande Riviere De La  | Grande Riviere De    | G0265     | GRDC     | 4214830     | 21000                       | 20778                     | 54.849   | -        | 54.95      | -74.75     |
| Canada  | North America | Below Waterhen River    | Beaver                | Churchill            | G0266     | GRDC     | 4214300     | 45000                       | 45040                     | 54.819   | -        | 54.85      | -          |
| Canada  | North America | Above Bladder Rapids    | Nelson                | Nelson               | G0267     | GRDC     | 4213710     | 1000000                     | 970829                    | 54.775   | -        | 56.95      | -92.95     |
| Canada  | North America | Athabasca               | Athabasca             | Mackenzie            | G0268     | GRDC     | 4208870     | 74600                       | 74579                     | 54.722   | -        | 55.15      | -          |
| Canada  | North America | Usk                     | Skeena                | Skeena               | G0269     | GRDC     | 4206250     | 42200                       | 42027                     | 54.630   | -        | 54.95      | -          |
| Canada  | North America | Below Asheweig River    | Winisk                | Winisk River         | G0271     | GRDC     | 4214450     | 50000                       | 49967                     | 54.516   | -        | 54.75      | -87.35     |
| Canada  | North America | Jarvie                  | Pembina               | Mackenzie            | G0272     | GRDC     | 4208962     | 13100                       | 12948                     | 54.451   | -        | 54.35      | -          |
| Canada  | North America | Near Fort St James      | Stuart                | Fraser               | G0273     | GRDC     | 4207150     | 14600                       | 14564                     | 54.416   | -        | 54.25      | -          |
| Canada  | North America | Cold Lake Reserve       | Beaver                | Churchill            | G0274     | GRDC     | 4214210     | 14500                       | 14766                     | 54.354   | -        | 54.35      | -          |
| Canada  | North America | Near Dorintosh          | Beaver                | Churchill            | G0275     | GRDC     | 4214301     | 20500                       | 20138                     | 54.296   | -        | 54.35      | -          |
| Canada  | North America | Near Windfall           | Athabasca             | Mackenzie            | G0276     | GRDC     | 4208733     | 19600                       | 19606                     | 54.206   | -        | 54.25      | -          |
| Canada  | North America | Near Island Lake        | Island Lake           | Hayes (Trib. Hudson  | G0277     | GRDC     | 4214330     | 14000                       | 13965                     | 54.059   | -        | 53.95      | -94.65     |
| Canada  | North America | Vanderhoof              | Nechako               | Fraser               | G0278     | GRDC     | 4207160     | 22500                       | 25179                     | 54.026   | -        | 54.05      | -          |
| Canada  | North America | Shelley                 | Fraser                | Fraser               | G0279     | GRDC     | 4207190     | 32400                       | 32604                     | 54.011   | -        | 54.05      | -          |
| Canada  | North America | Isle Pierre             | Nechako               | Fraser               | G0280     | GRDC     | 4207180     | 42500                       | 43637                     | 53.960   | -        | 53.95      | -          |
| Canada  | North America | The Pas                 | Saskatchewan          | Nelson               | G0281     | GRDC     | 4213550     | 347000                      | 263531                    | 53.841   | -        | 53.85      | -          |
| Canada  | North America | Below Tobin Lake        | Saskatchewan          | Nelson               | G0283     | GRDC     | 4213552     | 289000                      | 283509                    | 53.702   | -        | 53.25      | -98.25     |
| Canada  | North America | Near Turnberry          | Carrot                | Nelson               | G0284     | GRDC     | 4213510     | 12600                       | 12675                     | 53.613   | -        | 53.55      | -          |
| Canada  | North America | Edmonton                | North Saskatchewan    | Nelson               | G0285     | GRDC     | 4213031     | 28000                       | 28020                     | 53.537   | -        | 53.35      | -          |
| Canada  | North America | Churchill Falls         | Churchill             | Churchill (Labrador) | G0286     | GRDC     | 4244501     | 69200                       | 47885                     | 53.536   | -        | 53.65      | -64.25     |
| Canada  | North America | Near Deer Creek         | North Saskatchewan    | Nelson               | G0287     | GRDC     | 4213300     | 57000                       | 57160                     | 53.516   | -        | 53.65      | -          |
| Canada  | North America | Outlet Of Muskrat Dam   | Severn                | Severn               | G0288     | GRDC     | 4214390     | 36500                       | 36974                     | 53.490   | -        | 53.35      | -91.75     |
| Canada  | North America | Near Cinema             | West Road             | Fraser               | G0290     | GRDC     | 4207250     | 12400                       | 12406                     | 53.311   | -        | 53.25      | -          |
| Canada  | North America | Above Upper Muskrat     | Churchill             | Churchill (Labrador) | G0291     | GRDC     | 4244500     | 92500                       | 93044                     | 53.247   | -        | 53.05      | -61.25     |
| Canada  | North America | Prince Albert           | North Saskatchewan    | Nelson               | G0293     | GRDC     | 4213440     | 131000                      | 127325                    | 53.202   | -        | 53.25      | -          |
| Canada  | North America | En Amont De La Riviere  | De Pontois            | Grande               | G0294     | GRDC     | 4214760     | 13200                       | 13237                     | 53.167   | -        | 53.15      | -74.25     |
| Canada  | North America | Grand Rapids            | Saskatchewan          | Nelson               | G0295     | GRDC     | 4213551     | 364000                      | 283509                    | 53.163   | -        | 53.25      | -98.25     |
| Canada  | North America | Below Muketei River     | Attawapiskat          | Attawapiskat         | G0296     | GRDC     | 4214080     | 36000                       | 36751                     | 53.091   | -        | 53.15      | -85.35     |
| Canada  | North America | St Louis                | South Saskatchewan    | Nelson               | G0299     | GRDC     | 4213401     | 148000                      | 70399                     | 52.923   | -        | 52.95      | -          |
| Canada  | North America | Near The Mouth          | Red Deer River (Trib. | Nelson               | G0300     | GRDC     | 4213560     | 14300                       | 14956                     | 52.879   | -        | 52.85      | -          |
| Canada  | North America | Near Erwood             | Red Deer River (Trib. | Nelson               | G0302     | GRDC     | 4213566     | 11000                       | 11500                     | 52.86    | -        | 52.85      | -          |
| Canada  | North America | Near The Saskatchewan   | Battle                | Nelson               | G0303     | GRDC     | 4213183     | 24800                       | 25068                     | 52.856   | -        | 52.95      | -          |
| Canada  | North America | Near Quesnel            | Quesnel               | Fraser               | G0305     | GRDC     | 4207320     | 11500                       | 11564                     | 52.843   | -        | 52.75      | -          |
| Canada  | North America | Battleford              | Battle                | Nelson               | G0307     | GRDC     | 4213181     | 29700                       | 27760                     | 52.735   | -        | 52.75      | -          |

| Country | Continent     | Station Name            | River Name            | River Basin     | GloFAS ID | Provider | Provider ID | Catchment Area Provided km² | Catchment Area GloFAS km² | LAT Prov | LON Prov | LAT GloFAS | LON GloFAS |
|---------|---------------|-------------------------|-----------------------|-----------------|-----------|----------|-------------|-----------------------------|---------------------------|----------|----------|------------|------------|
| Canada  | North America | Near Marguerite         | Fraser                | Fraser          | G0315     | GRDC     | 4207310     | 114000                      | 113648                    | 52.53    | -        | 52.95      | -          |
| Canada  | North America | Near Rocky Mountain     | North Saskatchewan    | Nelson          | G0318     | GRDC     | 4213033     | 11000                       | 11690                     | 52.380   | -        | 52.35      | -          |
| Canada  | North America | Red Deer                | Red Deer River (Trib. | Nelson          | G0319     | GRDC     | 4213563     | 11600                       | 11507                     | 52.276   | -        | 52.15      | -          |
| Canada  | North America | A La Tete De La Gorge   | Eastmain              | Eastmain        | G0322     | GRDC     | 4214701     | 21400                       | 21281                     | 52.171   | -        | 52.05      | -74.45     |
| Canada  | North America | Saskatoon               | South Saskatchewan    | Nelson          | G0324     | GRDC     | 4213400     | 141000                      | 66769                     | 52.140   | -        | 52.25      | -          |
| Canada  | North America | Below Attawapiskat Lake | Attawapiskat          | Attawapiskat    | G0326     | GRDC     | 4214480     | 24200                       | 24166                     | 52.087   | -        | 52.05      | -87.15     |
| Canada  | North America | Near Waterhen           | Waterhen              | Nelson          | G0334     | GRDC     | 4213603     | 55100                       | 56918                     | 51.852   | -        | 51.85      | -99.55     |
| Canada  | North America | Below Big Creek         | Chilcotin             | Fraser          | G0335     | GRDC     | 4207305     | 19300                       | 19508                     | 51.848   | -        | 51.85      | -          |
| Canada  | North America | En Aval Du Lac Breton   | Little Mecatina       | Little Mecatina | G0336     | GRDC     | 4244655     | 12100                       | 12713                     | 51.843   | -        | 51.95      | -60.25     |
| Canada  | North America | Above Panther River     | Red Deer River (Trib. | Nelson          | G0344     | GRDC     | 4213561     | -                           | 1653                      | 51.659   | -        | 51.65      | -          |
| Canada  | North America | Kamsack                 | Assiniboine           | Nelson          | G0347     | GRDC     | 4213571     | 13000                       | 13474                     | 51.564   | -        | 51.55      | -          |
| Canada  | North America | Near Drumheller         | Kneehills Creek       | Nelson          | G0350     | GRDC     | 4213480     | -                           | 2438                      | 51.47    | -        | 51.45      | -          |
| Canada  | North America | Drumheller              | Red Deer River (Trib. | Nelson          | G0351     | GRDC     | 4213562     | 24800                       | 25080                     | 51.467   | -        | 51.45      | -          |
| Canada  | North America | En Aval Du Lac Nemiscou | Rupert                | Rupert          | G0352     | GRDC     | 4214680     | 40900                       | 40968                     | 51.448   | -        | 51.35      | -77.25     |
| Canada  | North America | Near Hat Island         | Albany                | Albany          | G0354     | GRDC     | 4214520     | 118000                      | 118451                    | 51.330   | -        | 51.15      | -84.45     |
| Canada  | North America | Mclure                  | North Thompson        | Fraser          | G0357     | GRDC     | 4207830     | 19600                       | 20093                     | 51.041   | -        | 51.15      | -          |
| Canada  | North America | Above Whiteclay Lake    | Ogoki                 | Albany          | G0363     | GRDC     | 4214507     | 11200                       | 11229                     | 50.866   | -        | 50.85      | -88.95     |
| Canada  | North America | Below Carseland Dam     | Bow                   | Nelson          | G0366     | GRDC     | 4213044     | 15700                       | 15790                     | 50.823   | -        | 50.75      | -          |
| Canada  | North America | Near Russell            | Assiniboine           | Nelson          | G0367     | GRDC     | 4213576     | 19300                       | 19097                     | 50.809   | -        | 50.85      | -          |
| Canada  | North America | Below Loon Creek        | Qu'appelle            | Nelson          | G0369     | GRDC     | 4213201     | 36500                       | 36158                     | 50.786   | -        | 50.65      | -          |
| Canada  | North America | Chase                   | South Thompson        | Fraser          | G0370     | GRDC     | 4207860     | 16200                       | 16458                     | 50.765   | -        | 50.75      | -          |
| Canada  | North America | Below Bassano Dam       | Bow                   | Nelson          | G0371     | GRDC     | 4213042     | 20300                       | 20354                     | 50.75    | -        | 50.45      | -          |
| Canada  | North America | Above Moose River       | Moose                 | Moose           | G0372     | GRDC     | 4214551     | 60100                       | 62779                     | 50.743   | -        | 50.75      | -81.45     |
| Canada  | North America | Below Craven Dam        | Qu'appelle            | Nelson          | G0373     | GRDC     | 4213200     | 10400                       | 10433                     | 50.705   | -        | 50.75      | -          |
| Canada  | North America | Ear Falls               | English               | Nelson          | G0375     | GRDC     | 4213911     | 26400                       | 27144                     | 50.633   | -        | 50.65      | -93.25     |
| Canada  | North America | Below Waboose River     | Missinaibi            | Moose           | G0377     | GRDC     | 4214531     | 22900                       | 24299                     | 50.583   | -        | 50.45      | -82.35     |
| Canada  | North America | Pine Falls Generating   | Winnipeg              | Nelson          | G0378     | GRDC     | 4213802     | 136000                      | 139043                    | 50.567   | -        | 50.55      | -96.15     |
| Canada  | North America | Near Welby              | Qu'appelle            | Nelson          | G0379     | GRDC     | 4213202     | 50900                       | 46674                     | 50.491   | -        | 50.45      | -          |
| Canada  | North America | En Aval De La Decharge  | Natashquan            | Natashquan      | G0381     | GRDC     | 4244635     | 15600                       | 15520                     | 50.427   | -        | 50.85      | -61.75     |
| Canada  | North America | Mcarthur Generating     | Winnipeg              | Nelson          | G0382     | GRDC     | 4213801     | 134000                      | 137918                    | 50.398   | -        | 50.45      | -96.05     |
| Canada  | North America | Near Spences Bridge     | Thompson              | Fraser          | G0383     | GRDC     | 4207800     | 54900                       | 56773                     | 50.356   | -        | 50.45      | -          |
| Canada  | North America | Above Qnslr Bridge      | Moisie                | -               | G0384     | GRDC     | 4243800     | 19000                       | 19407                     | 50.350   | -        | 50.45      | -66.15     |
| Canada  | North America | Slave Falls             | Winnipeg              | Nelson          | G0385     | GRDC     | 4213800     | 126000                      | 128400                    | 50.225   | -        | 50.35      | -95.55     |
| Canada  | North America | Whitedog Falls          | Winnipeg              | Nelson          | G0387     | GRDC     | 4213803     | -                           | 72782                     | 50.116   | -        | 50.15      | -94.85     |
| Canada  | North America | Near Miniota            | Assiniboine           | Nelson          | G0388     | GRDC     | 4213574     | 84700                       | 83934                     | 50.110   | -        | 49.85      | -99.85     |
| Canada  | North America | Near Lockport           | Red River(Of The      | Nelson          | G0389     | GRDC     | 4213681     | 278000                      | 267114                    | 50.107   | -        | 50.15      | -96.85     |
| Canada  | North America | Near The Mouth          | Bow                   | Nelson          | G0392     | GRDC     | 4213047     | 25300                       | 23504                     | 50.046   | -        | 50.05      | -          |
| Canada  | North America | Medicine Hat            | South Saskatchewan    | Nelson          | G0393     | GRDC     | 4213250     | 56500                       | 55497                     | 50.043   | -        | 50.05      | -          |
| Canada  | North America | En Amont De La Riviere  | Turgeon               | -               | G0397     | GRDC     | 4114615     | 11200                       | 11166                     | 49.985   | -        | 49.95      | -79.05     |



| Country | Continent     | Station Name            | River Name              | River Basin | GloFAS ID | Provider | Provider ID | Catchment Area Provided km² | Catchment Area GloFAS km² | LAT Prov | LON Prov | LAT GloFAS | LON GloFAS |
|---------|---------------|-------------------------|-------------------------|-------------|-----------|----------|-------------|-----------------------------|---------------------------|----------|----------|------------|------------|
| Canada  | North America | Near Portage La Prairie | Assiniboine             | Nelson      | G0398     | GRDC     | 4213575     | 161000                      | 150402                    | 49.935   | -98.28   | 49.95      | -98.15     |
| Canada  | North America | Near The Mouth          | Oldman                  | Nelson      | G0400     | GRDC     | 4213103     | 27500                       | 28163                     | 49.918   | -111.8   | 49.95      | -          |
| Canada  | North America | Abitibi Canyon          | Abitibi                 | Moose       | G0401     | GRDC     | 4214515     | 22900                       | 22942                     | 49.881   | -        | 50.05      | -81.55     |
| Canada  | North America | Near Brandon            | Assiniboine             | Nelson      | G0402     | GRDC     | 4213570     | 85700                       | 85243                     | 49.872   | -        | 49.65      | -99.65     |
| Canada  | North America | Headingley              | Assiniboine             | Nelson      | G0403     | GRDC     | 4213650     | 153000                      | 151377                    | 49.869   | -        | 49.85      | -97.35     |
| Canada  | North America | A La Chute Rouge        | Waswanipi               | Nottaway    | G0404     | GRDC     | 4214655     | 31900                       | 32624                     | 49.857   | -        | 49.85      | -77.25     |
| Canada  | North America | Near St Norbert         | Red River (Of The       | Nelson      | G0407     | GRDC     | 4213682     | 122000                      | 108477                    | 49.786   | -        | 49.65      | -97.15     |
| Canada  | North America | Below Lake Of The Woods | Winnipeg                | Nelson      | G0408     | GRDC     | 4213804     | 70400                       | 72295                     | 49.783   | -        | 49.95      | -94.55     |
| Canada  | North America | En Amont Du Lac         | Bell                    | Nottaway    | G0410     | GRDC     | 4214621     | 22200                       | 22495                     | 49.753   | -        | 49.45      | -77.55     |
| Canada  | North America | Near Lethbridge         | Oldman                  | Nelson      | G0413     | GRDC     | 4213102     | 17000                       | 17552                     | 49.708   | -        | 49.65      | -          |
| Canada  | North America | Near Holland            | Assiniboine             | Nelson      | G0414     | GRDC     | 4213573     | 160000                      | 149668                    | 49.698   | -        | 49.75      | -98.75     |
| Canada  | North America | Above Oldman Flume      | Lethbridge North Irrig. | Nelson      | G0415     | GRDC     | 4213490     | -                           | 5971                      | 49.686   | -        | 49.65      | -          |
| Canada  | North America | Souris                  | Souris                  | Nelson      | G0417     | GRDC     | 4213591     | 58700                       | 59834                     | 49.619   | -        | 49.55      | -          |
| Canada  | North America | Fort Steele             | Kootenay                | Columbia    | G0418     | GRDC     | 4215706     | 11400                       | 12227                     | 49.611   | -        | 49.65      | -          |
| Canada  | North America | Wawanesa                | Souris                  | Nelson      | G0419     | GRDC     | 4213590     | 60300                       | 60326                     | 49.601   | -        | 49.45      | -99.95     |
| Canada  | North America | Centrale No 3           | Outardes                | Manicouagan | G0420     | GRDC     | 4243580     | 17900                       | 17955                     | 49.558   | -        | 49.25      | -68.55     |
| Canada  | North America | Near Ste Agathe         | Red River(Of The        | Nelson      | G0421     | GRDC     | 4213683     | 115000                      | 98687                     | 49.553   | -        | 49.15      | -97.25     |
| Canada  | North America | Hope                    | Fraser                  | Fraser      | G0424     | GRDC     | 4207900     | 217000                      | 217138                    | 49.380   | -        | 50.05      | -          |
| Canada  | North America | Centrale No 2           | Manicouagan             | Manicouagan | G0425     | GRDC     | 4243605     | 45600                       | 46886                     | 49.335   | -        | 49.25      | -68.45     |
| Canada  | North America | Birchbank               | Columbia                | Columbia    | G0427     | GRDC     | 4215200     | 88100                       | 88809                     | 49.177   | -        | 49.25      | -          |
| Canada  | North America | Emerson                 | Red River(Of The        | Nelson      | G0430     | GRDC     | 4213680     | 104000                      | 105431                    | 49.008   | -        | 49.35      | -97.35     |
| Canada  | North America | Near Westhope           | Souris                  | Nelson      | G0433     | GRDC     | 4213594     | 43700                       | 43620                     | 48.996   | -        | 49.05      | -          |
| Canada  | North America | Near Copeland           | Kootenay                | Columbia    | G0438     | GRDC     | 4215320     | 34700                       | 36728                     | 48.905   | -        | 49.05      | -          |
| Canada  | North America | Centrale De Chute A La  | Peribonca               | Saguenay    | G0443     | GRDC     | 4243410     | 26900                       | 27018                     | 48.754   | -71.84   | 48.85      | -71.45     |
| Canada  | North America | Fort Frances            | Rainy                   | Nelson      | G0448     | GRDC     | 4213210     | 38600                       | 38837                     | 48.608   | -93.4    | 48.65      | -93.35     |
| Canada  | North America | Centrale D Isle Maligne | Saguenay                | Saguenay    | G0451     | GRDC     | 4243400     | 73000                       | 74207                     | 48.577   | -        | 48.65      | -71.75     |
| Canada  | North America | Outlet Of Lac La Croix  | Namakan                 | Nelson      | G0462     | GRDC     | 4213890     | 13400                       | 13205                     | 48.383   | -        | 48.35      | -92.25     |
| Canada  | North America | Fort Kent               | Saint John              | Saint John  | G0516     | GRDC     | 4231200     | 14700                       | 14807                     | 47.258   | -        | 47.25      | -68.65     |
| Canada  | North America | Grand Falls             | Saint John              | Saint John  | G0519     | GRDC     | 4231602     | 21900                       | 22038                     | 47.038   | -        | 47.05      | -67.75     |
| Canada  | North America | Centrale De Grande Mere | St. Maurice             | St.Lawrence | G0534     | GRDC     | 4243300     | 42000                       | 42057                     | 46.615   | -        | 46.85      | -72.75     |
| Canada  | North America | Sault Ste Marie         | St. Marys               | St.Lawrence | G0536     | GRDC     | 4234010     | 210000                      | 214172                    | 46.509   | -        | 46.45      | -84.45     |
| Canada  | North America | Near East Florenceville | Saint John              | Saint John  | G0538     | GRDC     | 4231601     | 34200                       | 34361                     | 46.47    | -        | 46.55      | -67.65     |
| Canada  | North America | La Cave Rapids          | Ottawa                  | St.Lawrence | G0543     | GRDC     | 4243050     | 47900                       | 49368                     | 46.377   | -        | 46.95      | -79.35     |
| Canada  | North America | Dry Pine Bay            | French                  | St.Lawrence | G0558     | GRDC     | 4234400     | 13900                       | 14227                     | 46.068   | -        | 46.05      | -80.65     |
| Canada  | North America | Below Mactaquac         | Saint John              | Saint John  | G0561     | GRDC     | 4231630     | 39900                       | 41336                     | 45.962   | -        | 45.95      | -66.75     |
| Canada  | North America | Au Barrage De Carillon  | Ottawa                  | St.Lawrence | G0577     | GRDC     | 4243101     | 143000                      | 141449                    | 45.57    | -        | 45.65      | -74.75     |
| Canada  | North America | Chats Falls             | Ottawa                  | St.Lawrence | G0581     | GRDC     | 4243100     | 89600                       | 90244                     | 45.475   | -        | 45.45      | -76.35     |
| Canada  | North America | Lasalle                 | St. Lawrence            | St.Lawrence | G0582     | GRDC     | 4243151     | -                           | 948178                    | 45.415   | -        | 45.45      | -73.65     |
| Canada  | North America | Rapides Fryers          | Richelieu               | St.Lawrence | G0584     | GRDC     | 4243240     | 22000                       | 22622                     | 45.398   | -        | 45.35      | -73.25     |

| Country | Continent     | Station Name      | River Name   | River Basin | GloFAS ID | Provider  | Provider ID | Catchment Area Provided km² | Catchment Area GloFAS km² | LAT Prov | LON Prov | LAT GloFAS | LON GloFAS |
|---------|---------------|-------------------|--------------|-------------|-----------|-----------|-------------|-----------------------------|---------------------------|----------|----------|------------|------------|
| Canada  | North America | Cornwall Ont Near | St. Lawrence | St.Lawrence | G0596     | GRDC      | 4143550     | 773892                      | 794560                    | 45.006   | -        | 45.25      | -74.05     |
| Canada  | North America | Queenston         | Niagara      | St.Lawrence | G0650     | GRDC      | 4236010     | 686000                      | 693613                    | 43.156   | -        | 43.15      | -79.05     |
| Canada  | North America | -                 | -            | -           | G2003     | Synthetic | -           | -                           | 2211                      | -        | -        | 82.95      | -73.65     |
| Canada  | North America | -                 | -            | -           | G2004     | Synthetic | -           | -                           | 7392                      | -        | -        | 81.75      | -70.25     |
| Canada  | North America | -                 | -            | -           | G2081     | Synthetic | -           | -                           | 12472                     | -        | -        | 70.75      | -80.55     |
| Canada  | North America | -                 | -            | -           | G2114     | Synthetic | -           | -                           | 5157                      | -        | -        | 69.85      | -          |
| Canada  | North America | -                 | -            | -           | G2119     | Synthetic | -           | -                           | 10004                     | -        | -        | 69.75      | -          |
| Canada  | North America | -                 | -            | -           | G2190     | Synthetic | -           | -                           | 84540                     | -        | -        | 68.35      | -          |
| Canada  | North America | -                 | -            | -           | G2191     | Synthetic | -           | -                           | 1760870                   | -        | -        | 68.35      | -          |
| Canada  | North America | -                 | -            | -           | G2192     | Synthetic | -           | -                           | 5727                      | -        | -        | 68.35      | -          |
| Canada  | North America | -                 | -            | -           | G2211     | Synthetic | -           | -                           | 18692                     | -        | -        | 68.15      | -          |
| Canada  | North America | -                 | -            | -           | G2216     | Synthetic | -           | -                           | 9085                      | -        | -        | 68.05      | -          |
| Canada  | North America | -                 | -            | -           | G2217     | Synthetic | -           | -                           | 10077                     | -        | -        | 68.05      | -          |
| Canada  | North America | -                 | -            | -           | G2245     | Synthetic | -           | -                           | 42528                     | -        | -        | 67.55      | -          |
| Canada  | North America | -                 | -            | -           | G2267     | Synthetic | -           | -                           | 7297                      | -        | -        | 67.15      | -          |
| Canada  | North America | -                 | -            | -           | G2268     | Synthetic | -           | -                           | 24896                     | -        | -        | 67.15      | -95.25     |
| Canada  | North America | -                 | -            | -           | G2269     | Synthetic | -           | -                           | 10622                     | -        | -        | 67.15      | -93.05     |
| Canada  | North America | -                 | -            | -           | G2294     | Synthetic | -           | -                           | 1703890                   | -        | -        | 66.85      | -          |
| Canada  | North America | -                 | -            | -           | G2300     | Synthetic | -           | -                           | 7064                      | -        | -        | 66.75      | -          |
| Canada  | North America | -                 | -            | -           | G2310     | Synthetic | -           | -                           | 10816                     | -        | -        | 66.65      | -69.65     |
| Canada  | North America | -                 | -            | -           | G2335     | Synthetic | -           | -                           | 9905                      | -        | -        | 66.45      | -          |
| Canada  | North America | -                 | -            | -           | G2343     | Synthetic | -           | -                           | 18276                     | -        | -        | 66.35      | -          |
| Canada  | North America | -                 | -            | -           | G2344     | Synthetic | -           | -                           | 35003                     | -        | -        | 66.35      | -69.15     |
| Canada  | North America | -                 | -            | -           | G2345     | Synthetic | -           | -                           | 27947                     | -        | -        | 66.35      | -69.05     |
| Canada  | North America | -                 | -            | -           | G2359     | Synthetic | -           | -                           | 1678570                   | -        | -        | 66.25      | -          |
| Canada  | North America | -                 | -            | -           | G2368     | Synthetic | -           | -                           | 8080                      | -        | -        | 66.15      | -          |
| Canada  | North America | -                 | -            | Coppermine  | G2369     | Synthetic | -           | -                           | 18584                     | -        | -        | 66.15      | -          |
| Canada  | North America | -                 | -            | -           | G2376     | Synthetic | -           | -                           | 1669470                   | -        | -        | 66.05      | -          |
| Canada  | North America | -                 | -            | -           | G2377     | Synthetic | -           | -                           | 128607                    | -        | -        | 66.05      | -97.15     |
| Canada  | North America | -                 | -            | -           | G2386     | Synthetic | -           | -                           | 40952                     | -        | -        | 65.95      | -          |
| Canada  | North America | -                 | -            | -           | G2387     | Synthetic | -           | -                           | 53472                     | -        | -        | 65.95      | -          |
| Canada  | North America | -                 | -            | -           | G2388     | Synthetic | -           | -                           | 9602                      | -        | -        | 65.95      | -          |
| Canada  | North America | -                 | -            | -           | G2389     | Synthetic | -           | -                           | 8412                      | -        | -        | 65.95      | -97.15     |
| Canada  | North America | -                 | -            | -           | G2401     | Synthetic | -           | -                           | 29279                     | -        | -        | 65.85      | -          |
| Canada  | North America | -                 | -            | -           | G2402     | Synthetic | -           | -                           | 10962                     | -        | -        | 65.85      | -          |
| Canada  | North America | -                 | -            | -           | G2407     | Synthetic | -           | -                           | 10812                     | -        | -        | 65.75      | -          |
| Canada  | North America | -                 | -            | -           | G2408     | Synthetic | -           | -                           | 59811                     | -        | -        | 65.75      | -          |
| Canada  | North America | -                 | -            | -           | G2418     | Synthetic | -           | -                           | 16072                     | -        | -        | 65.65      | -          |
| Canada  | North America | -                 | -            | -           | G2419     | Synthetic | -           | -                           | 1646890                   | -        | -        | 65.65      | -          |

| Country | Continent     | Station Name            | River Name | River Basin | GloFAS ID | Provider  | Provider ID | Catchment Area Provided km² | Catchment Area GloFAS km² | LAT Prov | LON Prov | LAT GloFAS | LON GloFAS |
|---------|---------------|-------------------------|------------|-------------|-----------|-----------|-------------|-----------------------------|---------------------------|----------|----------|------------|------------|
| Canada  | North America | near outlet of dismal   | Kendall    | Coppermine  | G2430     | WSC       | -           | 2790                        | 2360                      | 67.213   | -        | 67.15      | -          |
| Canada  | North America | -                       | -          | -           | G2446     | Synthetic | -           | -                           | 7951                      | -        | -        | 65.35      | -          |
| Canada  | North America | -                       | -          | -           | G2447     | Synthetic | -           | -                           | 1635390                   | -        | -        | 65.35      | -          |
| Canada  | North America | -                       | -          | -           | G2469     | Synthetic | -           | -                           | 6222                      | -        | -        | 65.15      | -          |
| Canada  | North America | at outlet of great bear | Mackenzie  | Mackenzie   | G2470     | WSC       | -           | 146000                      | 130268                    | 65.128   | -        | 65.15      | -          |
| Canada  | North America | -                       | -          | -           | G2483     | Synthetic | -           | -                           | 15892                     | -        | -        | 65.05      | -          |
| Canada  | North America | -                       | -          | -           | G2525     | Synthetic | -           | -                           | 11425                     | -        | -        | 64.55      | -          |
| Canada  | North America | -                       | -          | -           | G2526     | Synthetic | -           | -                           | 75564                     | -        | -        | 64.55      | -          |
| Canada  | North America | -                       | -          | -           | G2527     | Synthetic | -           | -                           | 17110                     | -        | -        | 64.55      | -94.25     |
| Canada  | North America | -                       | -          | -           | G2532     | Synthetic | -           | -                           | 14424                     | -        | -        | 64.45      | -          |
| Canada  | North America | -                       | -          | -           | G2533     | Synthetic | -           | -                           | 9914                      | -        | -        | 64.45      | -          |
| Canada  | North America | -                       | -          | -           | G2534     | Synthetic | -           | -                           | 42566                     | -        | -        | 64.45      | -          |
| Canada  | North America | -                       | -          | -           | G2535     | Synthetic | -           | -                           | 83168                     | -        | -        | 64.45      | -          |
| Canada  | North America | -                       | -          | -           | G2543     | Synthetic | -           | -                           | 27096                     | -        | -        | 64.35      | -          |
| Canada  | North America | -                       | -          | -           | G2544     | Synthetic | -           | -                           | 1451190                   | -        | -        | 64.35      | -          |
| Canada  | North America | -                       | -          | -           | G2545     | Synthetic | -           | -                           | 6200                      | -        | -        | 64.35      | -          |
| Canada  | North America | -                       | -          | -           | G2552     | Synthetic | -           | -                           | 17211                     | -        | -        | 64.25      | -          |
| Canada  | North America | -                       | -          | -           | G2553     | Synthetic | -           | -                           | 1433750                   | -        | -        | 64.25      | -          |
| Canada  | North America | -                       | -          | -           | G2554     | Synthetic | -           | -                           | 50850                     | -        | -        | 64.25      | -          |
| Canada  | North America | -                       | -          | -           | G2555     | Synthetic | -           | -                           | 184960                    | -        | -        | 64.25      | -94.95     |
| Canada  | North America | -                       | -          | -           | G2567     | Synthetic | -           | -                           | 8412                      | -        | -        | 64.15      | -          |
| Canada  | North America | -                       | -          | -           | G2568     | Synthetic | -           | -                           | 7936                      | -        | -        | 64.15      | -          |
| Canada  | North America | -                       | -          | -           | G2579     | Synthetic | -           | -                           | 269491                    | -        | -        | 64.05      | -          |
| Canada  | North America | -                       | -          | -           | G2580     | Synthetic | -           | -                           | 52430                     | -        | -        | 64.05      | -95.05     |
| Canada  | North America | -                       | -          | -           | G2617     | Synthetic | -           | -                           | 9963                      | -        | -        | 63.65      | -          |
| Canada  | North America | -                       | -          | -           | G2618     | Synthetic | -           | -                           | 9030                      | -        | -        | 63.65      | -97.15     |
| Canada  | North America | -                       | -          | -           | G2627     | Synthetic | -           | -                           | 15490                     | -        | -        | 63.55      | -          |
| Canada  | North America | -                       | -          | -           | G2628     | Synthetic | -           | -                           | 27020                     | -        | -        | 63.55      | -          |
| Canada  | North America | -                       | -          | -           | G2629     | Synthetic | -           | -                           | 32258                     | -        | -        | 63.55      | -97.15     |
| Canada  | North America | -                       | -          | -           | G2644     | Synthetic | -           | -                           | 53861                     | -        | -        | 63.45      | -          |
| Canada  | North America | -                       | -          | -           | G2645     | Synthetic | -           | -                           | 12154                     | -        | -        | 63.45      | -          |
| Canada  | North America | -                       | -          | -           | G2658     | Synthetic | -           | -                           | 34347                     | -        | -        | 63.35      | -          |
| Canada  | North America | -                       | -          | -           | G2659     | Synthetic | -           | -                           | 7062                      | -        | -        | 63.35      | -          |
| Canada  | North America | below aishihik lake     | AISHIHIK   | Alsek       | G2670     | WSC       | -           | 3000                        | 2980                      | 61.185   | -        | 61.15      | -          |
| Canada  | North America | -                       | -          | -           | G2671     | Synthetic | -           | -                           | 206249                    | -        | -        | 63.25      | -          |
| Canada  | North America | -                       | -          | -           | G2672     | Synthetic | -           | -                           | 16486                     | -        | -        | 63.25      | -          |
| Canada  | North America | above white river       | Yukon      | Yukon       | G2678     | WSC       | -           | 149000                      | 154284                    | 63.082   | -        | 62.95      | -          |
| Canada  | North America | -                       | -          | -           | G2684     | Synthetic | -           | -                           | 6302                      | -        | -        | 63.05      | -          |
| Canada  | North America | -                       | -          | -           | G2693     | Synthetic | -           | -                           | 6472                      | -        | -        | 62.95      | -          |

| Country | Continent     | Station Name | River Name | River Basin | GloFAS ID | Provider  | Provider ID | Catchment Area Provided km <sup>2</sup> | Catchment Area GloFAS km <sup>2</sup> | LAT Prov | LON Prov | LAT GloFAS | LON GloFAS |
|---------|---------------|--------------|------------|-------------|-----------|-----------|-------------|-----------------------------------------|---------------------------------------|----------|----------|------------|------------|
| Canada  | North America | -            | -          | -           | G2697     | Synthetic | -           | -                                       | 53615                                 | -        | -        | 62.85      | -          |
| Canada  | North America | -            | -          | -           | G2700     | Synthetic | -           | -                                       | 35438                                 | -        | -        | 62.75      | -          |
| Canada  | North America | -            | -          | -           | G2701     | Synthetic | -           | -                                       | 1387630                               | -        | -        | 62.75      | -          |
| Canada  | North America | -            | -          | -           | G2702     | Synthetic | -           | -                                       | 28364                                 | -        | -        | 62.75      | -          |
| Canada  | North America | -            | -          | -           | G2703     | Synthetic | -           | -                                       | 23780                                 | -        | -        | 62.75      | -          |
| Canada  | North America | -            | -          | -           | G2708     | Synthetic | -           | -                                       | 28578                                 | -        | -        | 62.65      | -          |
| Canada  | North America | -            | -          | -           | G2709     | Synthetic | -           | -                                       | 95536                                 | -        | -        | 62.65      | -          |
| Canada  | North America | -            | -          | -           | G2716     | Synthetic | -           | -                                       | 13724                                 | -        | -        | 62.55      | -          |
| Canada  | North America | -            | -          | -           | G2723     | Synthetic | -           | -                                       | 7035                                  | -        | -        | 62.45      | -          |
| Canada  | North America | -            | -          | -           | G2724     | Synthetic | -           | -                                       | 14004                                 | -        | -        | 62.45      | -          |
| Canada  | North America | -            | -          | -           | G2735     | Synthetic | -           | -                                       | 16297                                 | -        | -        | 62.35      | -          |
| Canada  | North America | -            | -          | -           | G2736     | Synthetic | -           | -                                       | 8550                                  | -        | -        | 62.35      | -          |
| Canada  | North America | -            | -          | -           | G2737     | Synthetic | -           | -                                       | 8044                                  | -        | -        | 62.35      | -          |
| Canada  | North America | -            | -          | -           | G2738     | Synthetic | -           | -                                       | 28278                                 | -        | -        | 62.35      | -          |
| Canada  | North America | -            | -          | -           | G2746     | Synthetic | -           | -                                       | 1363730                               | -        | -        | 62.25      | -          |
| Canada  | North America | -            | -          | -           | G2747     | Synthetic | -           | -                                       | 26224                                 | -        | -        | 62.25      | -          |
| Canada  | North America | -            | -          | -           | G2748     | Synthetic | -           | -                                       | 28214                                 | -        | -        | 62.25      | -          |
| Canada  | North America | -            | -          | -           | G2749     | Synthetic | -           | -                                       | 6810                                  | -        | -        | 62.25      | -93.35     |
| Canada  | North America | -            | -          | -           | G2757     | Synthetic | -           | -                                       | 7241                                  | -        | -        | 62.15      | -          |
| Canada  | North America | -            | -          | -           | G2758     | Synthetic | -           | -                                       | 82924                                 | -        | -        | 62.15      | -          |
| Canada  | North America | -            | -          | -           | G2761     | Synthetic | -           | -                                       | 8854                                  | -        | -        | 62.05      | -          |
| Canada  | North America | -            | -          | -           | G2762     | Synthetic | -           | -                                       | 7552                                  | -        | -        | 62.05      | -          |
| Canada  | North America | -            | -          | -           | G2763     | Synthetic | -           | -                                       | 26170                                 | -        | -        | 62.05      | -93.55     |
| Canada  | North America | -            | -          | -           | G2774     | Synthetic | -           | -                                       | 16618                                 | -        | -        | 61.95      | -          |
| Canada  | North America | -            | -          | -           | G2775     | Synthetic | -           | -                                       | 12287                                 | -        | -        | 61.95      | -          |
| Canada  | North America | -            | -          | -           | G2786     | Synthetic | -           | -                                       | 60763                                 | -        | -        | 61.85      | -          |
| Canada  | North America | -            | -          | -           | G2787     | Synthetic | -           | -                                       | 36577                                 | -        | -        | 61.85      | -93.65     |
| Canada  | North America | -            | -          | -           | G2815     | Synthetic | -           | -                                       | 16188                                 | -        | -        | 61.55      | -          |
| Canada  | North America | -            | -          | -           | G2820     | Synthetic | -           | -                                       | 8398                                  | -        | -        | 61.45      | -          |
| Canada  | North America | -            | -          | -           | G2821     | Synthetic | -           | -                                       | 24812                                 | -        | -        | 61.45      | -94.15     |
| Canada  | North America | -            | -          | -           | G2826     | Synthetic | -           | -                                       | 1047870                               | -        | -        | 61.35      | -          |
| Canada  | North America | -            | -          | -           | G2827     | Synthetic | -           | -                                       | 1025380                               | -        | -        | 61.35      | -          |
| Canada  | North America | -            | -          | -           | G2828     | Synthetic | -           | -                                       | 9760                                  | -        | -        | 61.35      | -          |
| Canada  | North America | -            | -          | -           | G2829     | Synthetic | -           | -                                       | 10373                                 | -        | -        | 61.35      | -          |
| Canada  | North America | -            | -          | -           | G2830     | Synthetic | -           | -                                       | 7647                                  | -        | -        | 61.35      | -94.15     |
| Canada  | North America | -            | -          | -           | G2836     | Synthetic | -           | -                                       | 9333                                  | -        | -        | 61.25      | -          |
| Canada  | North America | -            | -          | -           | G2853     | Synthetic | -           | -                                       | 38683                                 | -        | -        | 61.05      | -          |
| Canada  | North America | -            | -          | -           | G2854     | Synthetic | -           | -                                       | 1003270                               | -        | -        | 61.05      | -          |
| Canada  | North America | -            | -          | -           | G2862     | Synthetic | -           | -                                       | 235711                                | -        | -        | 60.95      | -          |

| Country | Continent     | Station Name          | River Name | River Basin | GloFAS ID | Provider  | Provider ID | Catchment Area Provided km² | Catchment Area GloFAS km² | LAT Prov | LON Prov | LAT GloFAS | LON GloFAS |
|---------|---------------|-----------------------|------------|-------------|-----------|-----------|-------------|-----------------------------|---------------------------|----------|----------|------------|------------|
| Canada  | North America | outlet of kusawa lake | Takhini    | Yukon       | G2870     | WSC       | -           | 4070                        | 4748                      | 60.612   | -        | 60.65      | -          |
| Canada  | North America | -                     | -          | -           | G2871     | Synthetic | -           | -                           | 29634                     | -        | -        | 60.85      | -          |
| Canada  | North America | -                     | -          | -           | G2875     | Synthetic | -           | -                           | 53558                     | -        | -        | 60.75      | -          |
| Canada  | North America | -                     | -          | -           | G2880     | Synthetic | -           | -                           | 8932                      | -        | -        | 60.65      | -          |
| Canada  | North America | -                     | -          | -           | G2911     | Synthetic | -           | -                           | 17885                     | -        | -        | 60.25      | -          |
| Canada  | North America | -                     | -          | -           | G2919     | Synthetic | -           | -                           | 12997                     | -        | -        | 60.15      | -76.85     |
| Canada  | North America | -                     | -          | -           | G2920     | Synthetic | -           | -                           | 10504                     | -        | -        | 60.15      | -71.25     |
| Canada  | North America | -                     | -          | -           | G2924     | Synthetic | -           | -                           | 12662                     | -        | -        | 60.05      | -          |
| Canada  | North America | -                     | -          | -           | G2925     | Synthetic | -           | -                           | 12101                     | -        | -        | 60.05      | -76.85     |
| Canada  | North America | -                     | -          | -           | G2926     | Synthetic | -           | -                           | 11502                     | -        | -        | 60.05      | -72.55     |
| Canada  | North America | -                     | -          | -           | G2927     | Synthetic | -           | -                           | 32275                     | -        | -        | 60.05      | -71.25     |
| Canada  | North America | -                     | -          | -           | G2931     | Synthetic | -           | -                           | 33979                     | -        | -        | 59.95      | -          |
| Canada  | North America | -                     | -          | -           | G2932     | Synthetic | -           | -                           | 9773                      | -        | -        | 59.95      | -          |
| Canada  | North America | -                     | -          | -           | G2938     | Synthetic | -           | -                           | 50096                     | -        | -        | 59.85      | -          |
| Canada  | North America | -                     | -          | -           | G2939     | Synthetic | -           | -                           | 14260                     | -        | -        | 59.85      | -72.55     |
| Canada  | North America | -                     | -          | -           | G2944     | Synthetic | -           | -                           | 9324                      | -        | -        | 59.75      | -          |
| Canada  | North America | -                     | -          | -           | G2945     | Synthetic | -           | -                           | 121753                    | -        | -        | 59.75      | -          |
| Canada  | North America | -                     | -          | -           | G2946     | Synthetic | -           | -                           | 11401                     | -        | -        | 59.75      | -          |
| Canada  | North America | -                     | -          | -           | G2952     | Synthetic | -           | -                           | 90574                     | -        | -        | 59.65      | -          |
| Canada  | North America | -                     | -          | Alsek       | G2961     | Synthetic | -           | -                           | 19945                     | -        | -        | 59.55      | -          |
| Canada  | North America | -                     | -          | -           | G2962     | Synthetic | -           | -                           | 137253                    | -        | -        | 59.55      | -          |
| Canada  | North America | -                     | -          | Alsek       | G2969     | Synthetic | -           | -                           | 7408                      | -        | -        | 59.45      | -          |
| Canada  | North America | -                     | -          | -           | G2970     | Synthetic | -           | -                           | 56740                     | -        | -        | 59.45      | -          |
| Canada  | North America | -                     | -          | -           | G2976     | Synthetic | -           | -                           | 9149                      | -        | -        | 59.35      | -          |
| Canada  | North America | -                     | -          | -           | G2981     | Synthetic | -           | -                           | 7889                      | -        | -        | 59.25      | -          |
| Canada  | North America | -                     | -          | -           | G2982     | Synthetic | -           | -                           | 64525                     | -        | -        | 59.25      | -          |
| Canada  | North America | -                     | -          | -           | G2983     | Synthetic | -           | -                           | 55311                     | -        | -        | 59.25      | -          |
| Canada  | North America | -                     | -          | -           | G2991     | Synthetic | -           | -                           | 14776                     | -        | -        | 59.15      | -          |
| Canada  | North America | -                     | -          | -           | G2997     | Synthetic | -           | -                           | 22789                     | -        | -        | 59.05      | -          |
| Canada  | North America | -                     | -          | -           | G2998     | Synthetic | -           | -                           | 9081                      | -        | -        | 59.05      | -          |
| Canada  | North America | -                     | -          | -           | G3006     | Synthetic | -           | -                           | 7323                      | -        | -        | 58.95      | -97.45     |
| Canada  | North America | -                     | -          | -           | G3013     | Synthetic | -           | -                           | 21565                     | -        | -        | 58.85      | -          |
| Canada  | North America | -                     | -          | -           | G3014     | Synthetic | -           | -                           | 39091                     | -        | -        | 58.85      | -97.55     |
| Canada  | North America | -                     | -          | -           | G3030     | Synthetic | -           | -                           | 26655                     | -        | -        | 58.65      | -          |
| Canada  | North America | -                     | -          | -           | G3031     | Synthetic | -           | -                           | 291182                    | -        | -        | 58.65      | -          |
| Canada  | North America | -                     | -          | -           | G3051     | Synthetic | -           | -                           | 11411                     | -        | -        | 58.45      | -          |
| Canada  | North America | -                     | -          | -           | G3056     | Synthetic | -           | -                           | 234466                    | -        | -        | 58.35      | -          |
| Canada  | North America | -                     | -          | -           | G3057     | Synthetic | -           | -                           | 251143                    | -        | -        | 58.35      | -          |
| Canada  | North America | -                     | -          | -           | G3063     | Synthetic | -           | -                           | 7698                      | -        | -        | 58.25      | -          |

| Country | Continent     | Station Name              | River Name | River Basin         | GloFAS ID | Provider  | Provider ID | Catchment Area Provided km² | Catchment Area GloFAS km² | LAT Prov | LON Prov | LAT GloFAS | LON GloFAS |
|---------|---------------|---------------------------|------------|---------------------|-----------|-----------|-------------|-----------------------------|---------------------------|----------|----------|------------|------------|
| Canada  | North America | -                         | -          | -                   | G3064     | Synthetic | -           | -                           | 38197                     | -        | -        | 58.25      | -          |
| Canada  | North America | -                         | -          | -                   | G3072     | Synthetic | -           | -                           | 11902                     | -        | -        | 58.15      | -          |
| Canada  | North America | -                         | -          | Churchill           | G3102     | Synthetic | -           | -                           | 9452                      | -        | -        | 57.55      | -95.35     |
| Canada  | North America | -                         | -          | -                   | G3103     | Synthetic | -           | -                           | 94706                     | -        | -        | 57.55      | -69.45     |
| Canada  | North America | -                         | -          | -                   | G3115     | Synthetic | -           | -                           | 9998                      | -        | -        | 57.35      | -70.85     |
| Canada  | North America | -                         | -          | -                   | G3117     | Synthetic | -           | -                           | 9887                      | -        | -        | 57.25      | -          |
| Canada  | North America | -                         | -          | -                   | G3118     | Synthetic | -           | -                           | 22329                     | -        | -        | 57.25      | -70.75     |
| Canada  | North America | -                         | -          | -                   | G3127     | Synthetic | -           | -                           | 212335                    | -        | -        | 57.15      | -          |
| Canada  | North America | -                         | -          | -                   | G3134     | Synthetic | -           | -                           | 7464                      | -        | -        | 57.05      | -          |
| Canada  | North America | -                         | -          | -                   | G3135     | Synthetic | -           | -                           | 25706                     | -        | -        | 57.05      | -          |
| Canada  | North America | -                         | -          | -                   | G3136     | Synthetic | -           | -                           | 17885                     | -        | -        | 57.05      | -67.05     |
| Canada  | North America | -                         | -          | -                   | G3139     | Synthetic | -           | -                           | 9553                      | -        | -        | 56.95      | -67.25     |
| Canada  | North America | above granville falls     | Churchill  | Churchill           | G3147     | WSC       | -           | 230000                      | 233905                    | 56.147   | -        | 56.15      | -          |
| Canada  | North America | -                         | -          | -                   | G3148     | Synthetic | -           | -                           | 7133                      | -        | -        | 56.85      | -71.55     |
| Canada  | North America | -                         | -          | -                   | G3149     | Synthetic | -           | -                           | 11847                     | -        | -        | 56.85      | -71.35     |
| Canada  | North America | -                         | -          | -                   | G3177     | Synthetic | -           | -                           | 9852                      | -        | -        | 56.25      | -          |
| Canada  | North America | -                         | -          | -                   | G3183     | Synthetic | -           | -                           | 77547                     | -        | -        | 56.15      | -          |
| Canada  | North America | -                         | -          | -                   | G3184     | Synthetic | -           | -                           | 22086                     | -        | -        | 56.15      | -96.55     |
| Canada  | North America | -                         | -          | -                   | G3190     | Synthetic | -           | -                           | 44983                     | -        | -        | 56.05      | -          |
| Canada  | North America | -                         | -          | -                   | G3191     | Synthetic | -           | -                           | 16377                     | -        | -        | 56.05      | -96.65     |
| Canada  | North America | below trout falls         | Hayes      | Hayes (Trib. Hudson | G3192     | WSC       | -           | 9190                        | 9471                      | 54.856   | -95.12   | 54.85      | -95.25     |
| Canada  | North America | below sipiwesk lake       | nelson     | Nelson              | G3199     | WSC       | -           | 1050000                     | 912723                    | 55.25    | -96.95   | 55.95      | -96.55     |
| Canada  | North America | -                         | -          | -                   | G3200     | Synthetic | -           | -                           | 15903                     | -        | -        | 55.95      | -93.45     |
| Canada  | North America | -                         | -          | -                   | G3201     | Synthetic | -           | -                           | 14136                     | -        | -        | 55.95      | -93.25     |
| Canada  | North America | -                         | -          | Churchill           | G3208     | Synthetic | -           | -                           | 96736                     | -        | -        | 55.75      | -          |
| Canada  | North America | -                         | -          | -                   | G3217     | Synthetic | -           | -                           | 71923                     | -        | -        | 55.65      | -          |
| Canada  | North America | -                         | -          | -                   | G3223     | Synthetic | -           | -                           | 141367                    | -        | -        | 55.55      | -          |
| Canada  | North America | below cheslatta falls     | nechako    | Fraser              | G3233     | WSC       | -           | 15500                       | 15977                     | 53.685   | -        | 53.65      | -          |
| Canada  | North America | -                         | -          | -                   | G3234     | Synthetic | -           | -                           | 11818                     | -        | -        | 55.45      | -          |
| Canada  | North America | outlet of cold lake       | Cold       | Churchill           | G3235     | WSC       | -           | 6515                        | 7040                      | 54.566   | -        | 54.55      | -          |
| Canada  | North America | at outlet of lac la longe | Rapid      | Churchill           | G3238     | WSC       | -           | 15522                       | 14435                     | 55.352   | -        | 55.35      | -          |
| Canada  | North America | -                         | -          | -                   | G3239     | Synthetic | -           | -                           | 31075                     | -        | -        | 55.35      | -92.65     |
| Canada  | North America | outlet of eutsuk lake     | eutsuk     | Fraser              | G3243     | WSC       | -           | -                           | 2358                      | 53.234   | -        | 53.25      | -          |
| Canada  | North America | -                         | -          | -                   | G3244     | Synthetic | -           | -                           | 11987                     | -        | -        | 55.25      | -          |
| Canada  | North America | -                         | -          | -                   | G3245     | Synthetic | -           | -                           | 20565                     | -        | -        | 55.25      | -          |
| Canada  | North America | -                         | -          | -                   | G3246     | Synthetic | -           | -                           | 16307                     | -        | -        | 55.25      | -92.55     |
| Canada  | North America | -                         | -          | -                   | G3247     | Synthetic | -           | -                           | 15662                     | -        | -        | 55.25      | -88.35     |
| Canada  | North America | -                         | -          | -                   | G3250     | Synthetic | -           | -                           | 15197                     | -        | -        | 55.15      | -          |
| Canada  | North America | -                         | -          | -                   | G3253     | Synthetic | -           | -                           | 13750                     | -        | -        | 55.05      | -          |

| Country | Continent     | Station Name              | River Name            | River Basin  | GloFAS ID | Provider  | Provider ID | Catchment Area Provided km² | Catchment Area GloFAS km² | LAT Prov | LON Prov | LAT GloFAS | LON GloFAS |
|---------|---------------|---------------------------|-----------------------|--------------|-----------|-----------|-------------|-----------------------------|---------------------------|----------|----------|------------|------------|
| Canada  | North America | -                         | -                     | -            | G3254     | Synthetic | -           | -                           | 9074                      | -        | -        | 55.05      | -          |
| Canada  | North America | -                         | -                     | -            | G3255     | Synthetic | -           | -                           | 7490                      | -        | -        | 55.05      | -92.75     |
| Canada  | North America | -                         | -                     | -            | G3256     | Synthetic | -           | -                           | 20243                     | -        | -        | 55.05      | -89.05     |
| Canada  | North America | -                         | -                     | -            | G3259     | Synthetic | -           | -                           | 78546                     | -        | -        | 54.95      | -          |
| Canada  | North America | -                         | -                     | -            | G3260     | Synthetic | -           | -                           | 52043                     | -        | -        | 54.95      | -88.95     |
| Canada  | North America | -                         | -                     | -            | G3261     | Synthetic | -           | -                           | 56536                     | -        | -        | 54.95      | -85.45     |
| Canada  | North America | -                         | -                     | -            | G3262     | Synthetic | -           | -                           | 12198                     | -        | -        | 54.95      | -85.35     |
| Canada  | North America | -                         | -                     | -            | G3273     | Synthetic | -           | -                           | 31520                     | -        | -        | 54.75      | -69.85     |
| Canada  | North America | -                         | -                     | -            | G3274     | Synthetic | -           | -                           | 9417                      | -        | -        | 54.75      | -69.65     |
| Canada  | North America | -                         | -                     | -            | G3278     | Synthetic | -           | -                           | 37978                     | -        | -        | 54.65      | -          |
| Canada  | North America | -                         | -                     | -            | G3279     | Synthetic | -           | -                           | 11477                     | -        | -        | 54.65      | -          |
| Canada  | North America | east channel below sea    | Nelson                | Nelson       | G3285     | WSC       | -           | -                           | 890223                    | 54.244   | -        | 54.15      | -97.65     |
| Canada  | North America | below alexander           | Nipigon               | St.Lawrence  | G3300     | WSC       | -           | 24717                       | 25194                     | 49.122   | -        | 49.35      | -88.25     |
| Canada  | North America | -                         | -                     | -            | G3301     | Synthetic | -           | -                           | 32962                     | -        | -        | 54.25      | -87.15     |
| Canada  | North America | -                         | -                     | -            | G3306     | Synthetic | -           | -                           | 21322                     | -        | -        | 54.15      | -          |
| Canada  | North America | -                         | -                     | -            | G3309     | Synthetic | -           | -                           | 9690                      | -        | -        | 54.05      | -          |
| Canada  | North America | near dauphin river        | dauphin               | Nelson       | G3314     | WSC       | -           | 82300                       | 85123                     | 52.001   | -        | 51.85      | -98.35     |
| Canada  | North America | near fairford             | fairford              | Nelson       | G3315     | WSC       | -           | 79800                       | 82525                     | 51.587   | -        | 51.55      | -98.75     |
| Canada  | North America | below outlet of dauphin   | mossy                 | Nelson       | G3322     | WSC       | -           | 8740                        | 9375                      | 51.450   | -        | 51.55      | -          |
| Canada  | North America | near waterhen             | waterhen              | Nelson       | G3327     | WSC       | -           | 55100                       | 55360                     | 51.848   | -        | 51.75      | -99.65     |
| Canada  | North America | en amont de la riviere de | grande                | Grande       | G3328     | WSC       | -           | 37000                       | 37288                     | 53.627   | -        | 53.65      | -74.05     |
| Canada  | North America | near fort providence      | mackenzie             | Nelson       | G3335     | WSC       | -           | 980000                      | 883299                    | 61.260   | -        | 53.75      | -97.95     |
| Canada  | North America | pres de la grande riviere | de pontois            | Grande       | G3336     | WSC       | -           | 19100                       | 18619                     | 53.620   | -        | 53.55      | -74.75     |
| Canada  | North America | at charlies edwards point | exploits              | -            | G3342     | WSC       | -           | -                           | 23948                     | 48.943   | -        | 53.45      | -64.65     |
| Canada  | North America | -                         | -                     | -            | G3352     | Synthetic | -           | -                           | 9554                      | -        | -        | 52.65      | -          |
| Canada  | North America | outlet of chilko lake     | chilko                | Fraser       | G3421     | WSC       | -           | 2130                        | 2376                      | 51.624   | -        | 51.65      | -          |
| Canada  | North America | above nottik island       | Albany                | Albany       | G3439     | WSC       | -           | 32400                       | 33465                     | 51.641   | -        | 51.55      | -86.45     |
| Canada  | North America | -                         | -                     | -            | G3446     | Synthetic | -           | -                           | 20883                     | -        | -        | 51.55      | -85.95     |
| Canada  | North America | -                         | -                     | -            | G3478     | Synthetic | -           | -                           | 101298                    | -        | -        | 51.15      | -80.85     |
| Canada  | North America | -                         | -                     | -            | G3479     | Synthetic | -           | -                           | 15187                     | -        | -        | 51.15      | -68.65     |
| Canada  | North America | -                         | -                     | -            | G3482     | Synthetic | -           | -                           | 66691                     | -        | -        | 51.05      | -81.05     |
| Canada  | North America | a la centrale no 5        | manicouagan (riviere) | MANICOUAGAN  | G3483     | WSC       | -           | 29300                       | 29357                     | 50.644   | -        | 50.95      | -68.65     |
| Canada  | North America | -                         | -                     | -            | G3488     | Synthetic | -           | -                           | 16080                     | -        | -        | 50.95      | -84.75     |
| Canada  | North America | au barrage cabonga        | gens de terre         | St. Lawrence | G3489     | WSC       | -           | 2620                        | 3416                      | 47.304   | -        | 47.25      | -76.35     |
| Canada  | North America | -                         | -                     | -            | G3493     | Synthetic | -           | -                           | 33503                     | -        | -        | 50.85      | -84.55     |
| Canada  | North America | near squilax              | adams                 | Fraser       | G3495     | WSC       | -           | 3210                        | 3317                      | 50.937   | -        | 50.95      | -          |
| Canada  | North America | at pentiction             | okanagan              | Columbia     | G3498     | WSC       | -           | 5980                        | 6350                      | 49.498   | -        | 49.45      | -          |
| Canada  | North America | -                         | -                     | -            | G3510     | Synthetic | -           | -                           | 39446                     | -        | -        | 50.35      | -93.95     |
| Canada  | North America | near montreal river       | montreal              | St. Lawrence | G3511     | WSC       | -           | 2880                        | 2977                      | 47.213   | -        | 47.25      | -84.55     |



| Country   | Continent     | Station Name            | River Name    | River Basin          | GloFAS ID | Provider  | Provider ID | Catchment Area Provided km² | Catchment Area GloFAS km² | LAT Prov | LON Prov | LAT GloFAS | LON GloFAS |
|-----------|---------------|-------------------------|---------------|----------------------|-----------|-----------|-------------|-----------------------------|---------------------------|----------|----------|------------|------------|
| Canada    | North America | above nagle creek       | columbia      | Columbia             | G3521     | WSC       | -           | 21500                       | 21914                     | 52.055   | -        | 51.95      | -          |
| Canada    | North America | -                       | -             | -                    | G3522     | Synthetic | -           | -                           | 9059                      | -        | -        | 50.25      | -93.95     |
| Canada    | North America | -                       | -             | -                    | G3523     | Synthetic | -           | -                           | 13616                     | -        | -        | 50.25      | -84.25     |
| Canada    | North America | Root River at Sault Ste | Root          | St.Lawrence          | G3554     | WSC       | -           | 108000                      | 12484                     | 46.562   | -        | 46.55      | -84.45     |
| Canada    | North America | at port huron           | Saint Clair   | St.Lawrence          | G3555     | WSC       | -           | 576013                      | 587250                    | 42.986   | -        | 42.95      | -82.45     |
| Canada    | North America | at iroquois falls       | abitibi       | Moose                | G3557     | WSC       | -           | 13300                       | 12916                     | 48.762   | -        | 48.75      | -80.65     |
| Canada    | North America | -                       | -             | -                    | G3559     | Synthetic | -           | -                           | 9108                      | -        | -        | 49.65      | -75.85     |
| Canada    | North America | a la centrale no 4      | outardes      | -                    | G3560     | WSC       | -           | 17200                       | 17215                     | 49.706   | -        | 49.55      | -68.75     |
| Canada    | North America | below minipi lake       | minipi        | Churchill (Labrador) | G3561     | WSC       | -           | 2330                        | 2394                      | 52.612   | -        | 52.55      | -61.25     |
| Canada    | North America | en aval de la riviere   | kinojevis     | St. Lawrence         | G3567     | WSC       | -           | 1680                        | 1676                      | -        | 48.455   | 48.45      | -78.35     |
| Canada    | North America | -                       | -             | -                    | G3568     | Synthetic | -           | -                           | 15404                     | -        | -        | 49.55      | -71.25     |
| Canada    | North America | -                       | -             | -                    | G3569     | Synthetic | -           | -                           | 9795                      | -        | -        | 49.55      | -71.15     |
| Canada    | North America | -                       | -             | -                    | G3589     | Synthetic | -           | -                           | 221802                    | -        | -        | 49.25      | -          |
| Canada    | North America | -                       | -             | -                    | G3614     | Synthetic | -           | -                           | 10108                     | -        | -        | 48.95      | -72.35     |
| Canada    | North America | a la centrale du rapide | saint maurice | St. Lawrence         | G3615     | WSC       | -           | 22600                       | 3796                      | 47.796   | -        | 48.35      | -71.15     |
| Canada    | North America | -                       | -             | -                    | G3627     | Synthetic | -           | -                           | 30248                     | -        | -        | 48.75      | -72.05     |
| Canada    | North America | arrow reservoir outflow | -             | Columbia             | G3630     | WSC       | -           | -                           | 37040                     | 49.338   | -        | 49.35      | -          |
| Canada    | North America | outflow near corra linn | kootenay      | Columbia             | G3631     | WSC       | -           | 46400                       | 46216                     | 49.466   | -        | 49.65      | -          |
| Canada    | North America | near grey river         | grey          | -                    | G3632     | WSC       | -           | 1340                        | 1429                      | 47.743   | -        | 48.05      | -56.95     |
| Canada    | North America | -                       | -             | -                    | G3724     | Synthetic | -           | -                           | 1063760                   | -        | -        | 46.75      | -71.35     |
| Canada    | North America | -                       | -             | -                    | G3737     | Synthetic | -           | -                           | 48579                     | -        | -        | 46.55      | -72.35     |
| Canada    | North America | -                       | -             | -                    | G3741     | Synthetic | -           | -                           | 1006920                   | -        | -        | 46.45      | -72.35     |
| Canada    | North America | à la tête de la chute   | mitchinamecus | St. Lawrence         | G3755     | WSC       | -           | 1050                        | 1193                      | 47.184   | -        | 47.15      | -75.15     |
| Canada    | North America | -                       | -             | -                    | G3756     | Synthetic | -           | -                           | 10323                     | -        | -        | 46.05      | -72.85     |
| Canada    | North America | -                       | -             | -                    | G3758     | Synthetic | -           | -                           | 955525                    | -        | -        | 45.95      | -73.25     |
| Canada    | North America | -                       | -             | -                    | G3759     | Synthetic | -           | -                           | 24560                     | -        | -        | 45.95      | -73.15     |
| Canada    | North America | lievre riviere du       | lievre        | St. Lawrence         | G3782     | WSC       | -           | 9350                        | 9486                      | 45.708   | -        | 45.65      | -75.45     |
| Canada    | North America | -                       | -             | -                    | G3787     | Synthetic | -           | -                           | 24649                     | -        | -        | 45.55      | -75.85     |
| Canada    | North America | at des joachims         | Ottawa        | St. Lawrence         | G3797     | WSC       | -           | 57500                       | 60818                     | 46.183   | -        | 46.15      | -77.55     |
| Canada    | North America | at britannia            | Ottawa        | St.Lawrence          | G3807     | WSC       | -           | 90900                       | 91919                     | 45.351   | -        | 45.35      | -75.85     |
| Canada    | North America | at fort wayne           | Detroit       | St.Lawrence          | G3912     | WSC       | -           | 592589                      | 603449                    | 42.298   | -        | 42.35      | -83.05     |
| Guatemala | North America | -                       | Chixoy        | Grisalva             | G1788     | DFO       | 270         | -                           | 11371                     | 16.154   | -        | 16.15      | -90.45     |
| Guatemala | North America | -                       | Naranjo       | -                    | G1862     | DFO       | 1058        | -                           | 840                       | 14.714   | -        | 14.75      | -92.05     |
| Haiti     | North America | -                       | Artibonite    | -                    | G1972     | DFO       | 2414        | -                           | 9278                      | 19.214   | -        | 19.15      | -72.65     |
| Honduras  | North America | -                       | Guayape       | Patacua              | G1973     | DFO       | 2481        | -                           | 7811                      | 14.714   | -        | 14.75      | -85.95     |
| Honduras  | North America | -                       | Patuca        | Patacua              | G1974     | DFO       | 2489        | -                           | 24022                     | 15.614   | -        | 15.55      | -84.35     |
| Mexico    | North America | Lindero Internacional   | Colorado      | Colorado (Pacific    | G0874     | GRDC      | 4352100     | 631960                      | 630175                    | 32.72    | -        | 31.95      | -          |
| Mexico    | North America | Agauas Abajo Del        | Grande        | Bravo                | G0911     | GRDC      | 4351200     | 71964                       | 67248                     | 29.57    | -        | 29.55      | -          |
| Mexico    | North America | Sabinas Coahuila        | Sabinas       | Bravo                | G0921     | GRDC      | 4351410     | 12825                       | 13806                     | 27.841   | -        | 27.85      | -          |



| Country | Continent     | Station Name            | River Name           | River Basin | GloFAS ID | Provider  | Provider ID | Catchment Area Provided km² | Catchment Area GloFAS km² | LAT Prov | LON Prov | LAT GloFAS | LON GloFAS |
|---------|---------------|-------------------------|----------------------|-------------|-----------|-----------|-------------|-----------------------------|---------------------------|----------|----------|------------|------------|
| Mexico  | North America | Progreso                | Nadadores            | Bravo       | G0922     | GRDC      | 4351420     | 23086                       | 23036                     | 27.425   | -        | 27.45      | -          |
| Mexico  | North America | Pipeline Crossing Below | Grande               | Bravo       | G0923     | GRDC      | 4151804     | 332771                      | 332982                    | 27.400   | -        | 28.95      | -          |
| Mexico  | North America | San Miguel Zapotitlan   | Fuerte               | Fuerte      | G0925     | GRDC      | 4355300     | 34247                       | 34498                     | 25.954   | -        | 26.05      | -          |
| Mexico  | North America | Palos Blancos           | Humaya               | -           | G0929     | GRDC      | 4355400     | 11409                       | 11230                     | 24.925   | -        | 24.95      | -          |
| Mexico  | North America | Las Adjuntas            | Panuco               | Panuco      | G0933     | GRDC      | 4358300     | 61063                       | 27798                     | 21.983   | -        | 22.05      | -98.65     |
| Mexico  | North America | San Pedro               | San Pedro            | San Pedro   | G0935     | GRDC      | 4356080     | 25800                       | 25878                     | 21.966   | -        | 21.85      | -          |
| Mexico  | North America | El Capomal              | Santiago             | Santiago    | G0936     | GRDC      | 4356100     | 128943                      | 123985                    | 21.825   | -        | 21.75      | -          |
| Mexico  | North America | Nuevo Galeana           | Canal Principal      | -           | G0944     | GRDC      | 4356520     | -                           | 12907                     | 18.547   | -        | 18.55      | -          |
| Mexico  | North America | Papaloapan              | Papaloapan           | Papaloapan  | G0948     | GRDC      | 4359220     | 21419                       | 21146                     | 18.17    | -96.08   | 18.25      | -95.95     |
| Mexico  | North America | Samaria                 | Samaria              | Grisalva    | G0950     | GRDC      | 4362202     | -                           | 37664                     | 17.979   | -        | 17.95      | -93.25     |
| Mexico  | North America | Reforma                 | Grijalva - Mezcalapa | Grisalva    | G0951     | GRDC      | 4362201     | 37702                       | 37782                     | 17.958   | -        | 17.95      | -93.15     |
| Mexico  | North America | Boca Del Cerro          | Usumacinta           | Grisalva    | G0957     | GRDC      | 4362600     | 47697                       | 47596                     | 17.433   | -        | 17.15      | -91.35     |
| Mexico  | North America | Santo Domingo           | Canal Santo Domingo  | -           | G0961     | GRDC      | 4356810     | 13164                       | 10479                     | 16.6     | -        | 16.25      | -95.15     |
| Mexico  | North America | Paso De La Reyna        | Verde - Atoyak       | Verde       | G0965     | GRDC      | 4356700     | 17617                       | 17359                     | 16.275   | -        | 16.35      | -97.65     |
| Mexico  | North America | -                       | Coatzacoalcos        | -           | G1725     | DFO       | 60          | -                           | 12698                     | 17.864   | -        | 17.85      | -94.65     |
| Mexico  | North America | -                       | Usumacinta           | Grisalva    | G1726     | DFO       | 63          | -                           | 65022                     | 17.774   | -        | 17.75      | -91.55     |
| Mexico  | North America | -                       | Upstream Falcon      | Bravo       | G1860     | DFO       | 1046        | -                           | 353535                    | 26.954   | -        | 26.95      | -99.35     |
| Mexico  | North America | -                       | Grijalva             | Grisalva    | G1861     | DFO       | 1052        | -                           | 38373                     | 18.044   | -        | 18.05      | -92.95     |
| Mexico  | North America | -                       | -                    | -           | G1980     | DFO       | 100002      | -                           | 4229                      | 19.034   | -        | 19.05      | -96.15     |
| Mexico  | North America | -                       | Balsas               | -           | G1981     | DFO       | 100007      | -                           | 113291                    | 18.044   | -        | 18.05      | -          |
| Mexico  | North America | -                       | -                    | Papaloapan  | G1982     | DFO       | 100014      | -                           | 23152                     | 18.584   | -        | 18.55      | -95.75     |
| Mexico  | North America | -                       | -                    | -           | G1988     | DFO       | 100078      | -                           | 3059                      | 31.904   | -        | 31.95      | -          |
| Mexico  | North America | -                       | -                    | -           | G4313     | Synthetic | -           | -                           | 13393                     | -        | -        | 31.25      | -          |
| Mexico  | North America | -                       | -                    | -           | G4324     | Synthetic | -           | -                           | 18198                     | -        | -        | 31.05      | -          |
| Mexico  | North America | -                       | -                    | -           | G4373     | Synthetic | -           | -                           | 22493                     | -        | -        | 29.65      | -          |
| Mexico  | North America | -                       | -                    | -           | G4381     | Synthetic | -           | -                           | 23112                     | -        | -        | 29.45      | -          |
| Mexico  | North America | -                       | -                    | -           | G4432     | Synthetic | -           | -                           | 37421                     | -        | -        | 28.35      | -          |
| Mexico  | North America | -                       | -                    | -           | G4435     | Synthetic | -           | -                           | 11858                     | -        | -        | 28.25      | -          |
| Mexico  | North America | -                       | -                    | -           | G4457     | Synthetic | -           | -                           | 21568                     | -        | -        | 27.65      | -          |
| Mexico  | North America | -                       | -                    | -           | G4458     | Synthetic | -           | -                           | 14315                     | -        | -        | 27.65      | -          |
| Mexico  | North America | -                       | -                    | -           | G4491     | Synthetic | -           | -                           | 23257                     | -        | -        | 27.45      | -          |
| Mexico  | North America | -                       | -                    | -           | G4511     | Synthetic | -           | -                           | 33182                     | -        | -        | 26.25      | -98.85     |
| Mexico  | North America | -                       | -                    | -           | G4635     | Synthetic | -           | -                           | 16711                     | -        | -        | 22.35      | -97.95     |
| Mexico  | North America | -                       | -                    | -           | G4636     | Synthetic | -           | -                           | 67624                     | -        | -        | 22.25      | -97.95     |
| Mexico  | North America | -                       | -                    | -           | G4651     | Synthetic | -           | -                           | 18029                     | -        | -        | 21.85      | -          |
| Mexico  | North America | -                       | -                    | -           | G4652     | Synthetic | -           | -                           | 33824                     | -        | -        | 21.85      | -98.55     |
| Mexico  | North America | -                       | -                    | -           | G4655     | Synthetic | -           | -                           | 103646                    | -        | -        | 21.75      | -          |
| Mexico  | North America | -                       | -                    | -           | G4675     | Synthetic | -           | -                           | 15306                     | -        | -        | 21.25      | -          |
| Mexico  | North America | -                       | -                    | -           | G4683     | Synthetic | -           | -                           | 83942                     | -        | -        | 21.05      | -          |

| Country       | Continent     | Station Name               | River Name        | River Basin | GloFAS ID | Provider  | Provider ID | Catchment Area Provided km² | Catchment Area GloFAS km² | LAT Prov | LON Prov | LAT GloFAS | LON GloFAS |
|---------------|---------------|----------------------------|-------------------|-------------|-----------|-----------|-------------|-----------------------------|---------------------------|----------|----------|------------|------------|
| Mexico        | North America | -                          | -                 | -           | G4691     | Synthetic | -           | -                           | 21144                     | -        | -        | 20.75      | -          |
| Mexico        | North America | -                          | -                 | -           | G4694     | Synthetic | -           | -                           | 49269                     | -        | -        | 20.65      | -          |
| Mexico        | North America | -                          | -                 | -           | G4761     | Synthetic | -           | -                           | 18188                     | -        | -        | 18.65      | -          |
| Mexico        | North America | -                          | -                 | -           | G4767     | Synthetic | -           | -                           | 70462                     | -        | -        | 18.35      | -92.55     |
| Mexico        | North America | -                          | -                 | -           | G4771     | Synthetic | -           | -                           | 61345                     | -        | -        | 18.25      | -          |
| Mexico        | North America | -                          | -                 | -           | G4777     | Synthetic | -           | -                           | 45364                     | -        | -        | 18.15      | -92.75     |
| Mexico        | North America | -                          | -                 | -           | G4799     | Synthetic | -           | -                           | 14108                     | -        | -        | 17.75      | -91.35     |
| Mexico        | North America | -                          | -                 | -           | G4848     | Synthetic | -           | -                           | 18709                     | -        | -        | 16.45      | -90.75     |
| United States | North America | Umiat Ak                   | Colville          | Colville    | G0013     | GRDC      | 4101501     | 35820                       | 35874                     | 69.36    | -        | 69.15      | -          |
| United States | North America | Near International         | Porcupine         | Yukon       | G0034     | GRDC      | 4103710     | 59829                       | 62559                     | 67.423   | -        | 67.45      | -          |
| United States | North America | Near Kiana Alas            | Kobuk             | Kobuk       | G0041     | GRDC      | 4101900     | 24657                       | 25181                     | 66.973   | -        | 67.05      | -          |
| United States | North America | Near Stevens Village Ak    | Yukon             | Yukon       | G0054     | GRDC      | 4103550     | 508417                      | 530194                    | 65.875   | -        | 65.85      | -          |
| United States | North America | Fairbanks Ak               | Tanana            | Yukon       | G0074     | GRDC      | 4103602     | -                           | 55528                     | 64.792   | -        | 64.75      | -          |
| United States | North America | Eagle Ak                   | Yukon             | Yukon       | G0076     | GRDC      | 4103800     | 293965                      | 301786                    | 64.789   | -141.2   | 64.85      | -          |
| United States | North America | Nenana Alas                | Tanana            | Yukon       | G0082     | GRDC      | 4103600     | 66304                       | 69343                     | 64.564   | -        | 64.55      | -          |
| United States | North America | Near Steele Creek Alas     | Fortymile         | Yukon       | G0086     | GRDC      | 4103820     | 15229                       | 15678                     | 64.308   | -        | 64.25      | -          |
| United States | North America | Near Tanacross Alas        | Tanana            | Yukon       | G0099     | GRDC      | 4103750     | 22144                       | 22217                     | 63.388   | -        | 63.35      | -          |
| United States | North America | Gold Creek Ak              | Susitna           | Susitna     | G0109     | GRDC      | 4102820     | 15954                       | 14985                     | 62.767   | -        | 62.75      | -          |
| United States | North America | Sunshine Ak                | Susitna           | Susitna     | G0120     | GRDC      | 4102810     | 28749                       | 28324                     | 62.177   | -        | 62.05      | -          |
| United States | North America | Pilot Station Ak           | Yukon             | Yukon       | G0123     | GRDC      | 4103200     | 831390                      | 865451                    | 61.933   | -        | 61.85      | -          |
| United States | North America | Crooked Creek Alas         | Kuskokwim         | Kuskokwim   | G0124     | GRDC      | 4102100     | 80549                       | 84194                     | 61.870   | -        | 61.85      | -          |
| United States | North America | Susitna Station Ak         | Susitna           | Susitna     | G0130     | GRDC      | 4102800     | 50246                       | 51216                     | 61.544   | -        | 61.55      | -          |
| United States | North America | Near Chitina Alas          | Copper            | Copper      | G0131     | GRDC      | 4102700     | 53354                       | 60073                     | 61.465   | -        | 61.45      | -          |
| United States | North America | Million Dollar Bridge Near | Copper            | Copper      | G0151     | GRDC      | 4102710     | 62678                       | 68870                     | 60.671   | -        | 60.65      | -          |
| United States | North America | Near Yakutat Alas          | Alsek             | Alsek       | G0172     | GRDC      | 4102050     | 28024                       | 28141                     | 59.394   | -        | 59.35      | -          |
| United States | North America | Ekwok Ak                   | Nushagak          | Nushagak    | G0174     | GRDC      | 4102740     | 25512                       | 25638                     | 59.348   | -        | 59.45      | -          |
| United States | North America | Near Juneau Ak             | Taku              | Taku        | G0189     | GRDC      | 4102600     | 17094                       | 18228                     | 58.54    | -133.7   | 58.55      | -          |
| United States | North America | Near Wrangell              | Stikine           | Stikine     | G0219     | GRDC      | 4204900     | 51593                       | 51971                     | 56.707   | -        | 56.75      | -          |
| United States | North America | International Boundary     | Columbia          | Columbia    | G0431     | GRDC      | 4215210     | 155000                      | 157874                    | 49.000   | -        | 48.95      | -          |
| United States | North America | International Boundary     | Pend Oreille      | Columbia    | G0432     | GRDC      | 4215220     | 65300                       | 65253                     | 48.998   | -        | 48.45      | -          |
| United States | North America | Porthill Id                | Kootenay          | Columbia    | G0434     | GRDC      | 4115322     | 35483                       | 34746                     | 48.996   | -        | 48.95      | -          |
| United States | North America | Near Sherwood              | Souris            | Nelson      | G0435     | GRDC      | 4213593     | 23100                       | 22815                     | 48.99    | -        | 48.55      | -          |
| United States | North America | Near Copeland Id           | Kootenay          | Columbia    | G0437     | GRDC      | 4115321     | 34706                       | 34912                     | 48.911   | -        | 48.95      | -          |
| United States | North America | Below Missoula Mt          | Clark Fork        | Columbia    | G0440     | GRDC      | 4115348     | 23318                       | 3146                      | 48.869   | -        | 48.75      | -          |
| United States | North America | Manitou Rapids             | Rainy             | Nelson      | G0446     | GRDC      | 4213211     | 50200                       | 50065                     | 48.634   | -        | 48.55      | -93.75     |
| United States | North America | Near Tonasket Wa           | Okanogan          | Columbia    | G0447     | GRDC      | 4115300     | 18803                       | 18889                     | 48.632   | -        | 48.65      | -          |
| United States | North America | Drayton Nd                 | Red River (Of The | Nelson      | G0452     | GRDC      | 4113301     | 90132                       | 92216                     | 48.572   | -        | 48.95      | -97.25     |
| United States | North America | Havre Mt                   | Milk              | Mississippi | G0453     | GRDC      | 4120202     | 14983                       | 14952                     | 48.563   | -        | 48.55      | -          |
| United States | North America | Near Bantry Nd             | Souris            | Nelson      | G0455     | GRDC      | 4113400     | 31857                       | 30951                     | 48.505   | -        | 48.45      | -          |

| Country       | Continent     | Station Name               | River Name        | River Basin | GloFAS ID | Provider | Provider ID | Catchment Area Provided km² | Catchment Area GloFAS km² | LAT Prov | LON Prov | LAT GloFAS | LON GloFAS |
|---------------|---------------|----------------------------|-------------------|-------------|-----------|----------|-------------|-----------------------------|---------------------------|----------|----------|------------|------------|
| United States | North America | Near Dodson Mt             | Milk              | Mississippi | G0458     | GRDC     | 4120201     | 28987                       | 27895                     | 48.403   | -        | 48.45      | -          |
| United States | North America | Libby Mt                   | Kootenay          | Columbia    | G0459     | GRDC     | 4115320     | 26522                       | 26593                     | 48.400   | -        | 48.45      | -          |
| United States | North America | Near Foxholm Nd            | Souris            | Nelson      | G0463     | GRDC     | 4113403     | 24527                       | 23650                     | 48.372   | -        | 48.35      | -          |
| United States | North America | Malott Wa                  | Okanogan          | Columbia    | G0466     | GRDC     | 4115301     | 20927                       | 20981                     | 48.281   | -        | 48.35      | -          |
| United States | North America | Above Minot Nd             | Souris            | Nelson      | G0468     | GRDC     | 4113402     | 27454                       | 27746                     | 48.245   | -        | 48.15      | -          |
| United States | North America | Near Verendrye Nd          | Souris            | Nelson      | G0470     | GRDC     | 4113401     | 29267                       | 28843                     | 48.159   | -        | 48.15      | -          |
| United States | North America | Nashua Mt                  | Milk              | Mississippi | G0472     | GRDC     | 4120200     | 57840                       | 56762                     | 48.129   | -        | 48.25      | -          |
| United States | North America | Near Culbertson Mt         | Missouri          | Mississippi | G0473     | GRDC     | 4120900     | 237133                      | 244447                    | 48.125   | -        | 48.15      | -          |
| United States | North America | Whitehorse Rapids Near     | Clark Fork        | Columbia    | G0474     | GRDC     | 4115346     | 57169                       | 57964                     | 48.091   | -        | 48.05      | -          |
| United States | North America | Below Fort Peck Dam Mt     | Missouri          | Mississippi | G0476     | GRDC     | 4120901     | 149070                      | 150160                    | 48.044   | -        | 47.95      | -          |
| United States | North America | Virgelle Mt                | Missouri          | Mississippi | G0477     | GRDC     | 4120902     | 89042                       | 89436                     | 48.005   | -        | 48.05      | -          |
| United States | North America | Grand Coulee Wa            | Columbia          | Columbia    | G0479     | GRDC     | 4115206     | 193473                      | 199095                    | 47.965   | -        | 47.95      | -          |
| United States | North America | Below Wells Dam Wa         | Columbia          | Columbia    | G0480     | GRDC     | 4115205     | 222999                      | 224371                    | 47.946   | -        | 48.05      | -          |
| United States | North America | Near Loma Mt               | Marias            | Mississippi | G0481     | GRDC     | 4120310     | 18117                       | 18250                     | 47.946   | -        | 47.95      | -          |
| United States | North America | Grand Forks N D            | Red River (Of The | Nelson      | G0482     | GRDC     | 4113300     | 77959                       | 67706                     | 47.927   | -        | 48.05      | -97.05     |
| United States | North America | Long Lake Wa               | Spokane           | Columbia    | G0485     | GRDC     | 4115400     | 15592                       | 16677                     | 47.836   | -        | 47.85      | -          |
| United States | North America | Fisher Mn                  | Red Lake          | Nelson      | G0487     | GRDC     | 4113320     | 14711                       | 14772                     | 47.800   | -        | 47.85      | -96.85     |
| United States | North America | Crookston Mn               | Red Lake          | Nelson      | G0490     | GRDC     | 4113321     | 13649                       | 13840                     | 47.775   | -        | 47.75      | -96.55     |
| United States | North America | Near Poison Mt             | Flathead          | Columbia    | G0494     | GRDC     | 4115332     | 18379                       | 19075                     | 47.680   | -        | 47.65      | -          |
| United States | North America | Greenacres Wa              | Spokane           | Columbia    | G0495     | GRDC     | 4115402     | 10748                       | 10824                     | 47.679   | -        | 47.75      | -          |
| United States | North America | Near Sidney Mt             | Yellowstone       | Mississippi | G0496     | GRDC     | 4120950     | 178925                      | 180660                    | 47.678   | -        | 47.55      | -          |
| United States | North America | Spokane Wa                 | Spokane           | Columbia    | G0497     | GRDC     | 4115401     | 11111                       | 11502                     | 47.659   | -        | 47.65      | -          |
| United States | North America | Near Watford City Nd       | Little Missouri   | Mississippi | G0498     | GRDC     | 4121100     | 21523                       | 21631                     | 47.595   | -        | 47.55      | -          |
| United States | North America | Rocky Reach Dam Wa         | Columbia          | Columbia    | G0505     | GRDC     | 4115204     | 227402                      | 233605                    | 47.524   | -        | 47.65      | -          |
| United States | North America | Near Cooperstown Nd        | Sheyenne          | Nelson      | G0508     | GRDC     | 4113361     | 16757                       | 6942                      | 47.432   | -        | 47.45      | -98.05     |
| United States | North America | Near Plains Mt             | Clark Fork        | Columbia    | G0509     | GRDC     | 4115347     | 51691                       | 52546                     | 47.429   | -        | 47.45      | -          |
| United States | North America | Perma Mt                   | Flathead          | Columbia    | G0510     | GRDC     | 4115331     | 22779                       | 23927                     | 47.367   | -        | 47.35      | -          |
| United States | North America | Halstad Mn                 | Red River (Of The | Nelson      | G0511     | GRDC     | 4113302     | 56462                       | 48946                     | 47.351   | -        | 47.45      | -96.85     |
| United States | North America | Below Rock Island Dam      | Columbia          | Columbia    | G0512     | GRDC     | 4115203     | 231546                      | 238020                    | 47.332   | -        | 47.35      | -          |
| United States | North America | St Regis Mt                | Clark Fork        | Columbia    | G0513     | GRDC     | 4115345     | 27736                       | 27936                     | 47.301   | -        | 47.35      | -          |
| United States | North America | Below Fish River Fort Kent | Saint John        | Saint John  | G0515     | GRDC     | 4131030     | 15317                       | 15404                     | 47.259   | -        | 47.25      | -68.55     |
| United States | North America | Mosby Mt                   | Musselshell       | Mississippi | G0520     | GRDC     | 4120320     | 20321                       | 20405                     | 46.994   | -        | 46.95      | -          |
| United States | North America | Valley City Nd             | Sheyenne          | Nelson      | G0521     | GRDC     | 4113362     | 20228                       | 10705                     | 46.913   | -        | 46.95      | -98.05     |
| United States | North America | West Fargo Nd              | Sheyenne          | Nelson      | G0522     | GRDC     | 4113365     | 22973                       | 30532                     | 46.891   | -        | 46.95      | -96.85     |
| United States | North America | Above Missoula Mt          | Clark Fork        | Columbia    | G0523     | GRDC     | 4115349     | 15537                       | 15996                     | 46.877   | -        | 46.85      | -          |
| United States | North America | Fargo Nd                   | Red River (Of The | Nelson      | G0524     | GRDC     | 4113303     | 17612                       | 16626                     | 46.861   | -        | 46.85      | -96.75     |
| United States | North America | Near Beverly Wa            | Crab              | Columbia    | G0526     | GRDC     | 4115270     | 12536                       | 12048                     | 46.829   | -        | 46.85      | -          |
| United States | North America | Bismarck Nd                | Missouri          | Mississippi | G0527     | GRDC     | 4121802     | 482776                      | 486828                    | 46.814   | -        | 46.85      | -          |
| United States | North America | Hickson Nd                 | Red River (Of The | Nelson      | G0531     | GRDC     | 4113304     | 11137                       | 10795                     | 46.659   | -        | 46.55      | -96.75     |

| Country       | Continent     | Station Name             | River Name             | River Basin | GloFAS ID | Provider | Provider ID | Catchment Area Provided km² | Catchment Area GloFAS km² | LAT Prov | LON Prov | LAT GloFAS | LON GloFAS |
|---------------|---------------|--------------------------|------------------------|-------------|-----------|----------|-------------|-----------------------------|---------------------------|----------|----------|------------|------------|
| United States | North America | Near Kindred Nd          | Sheyenne               | Nelson      | G0532     | GRDC     | 4113364     | 22792                       | 13734                     | 46.631   | -        | 46.85      | -96.95     |
| United States | North America | Below Priest Rapids Dam  | Columbia               | Columbia    | G0533     | GRDC     | 4115202     | 248640                      | 254172                    | 46.628   | -        | 46.65      | -          |
| United States | North America | Aitkin Mn                | Mississippi            | Mississippi | G0535     | GRDC     | 4119101     | 15903                       | 15245                     | 46.540   | -        | 46.55      | -93.75     |
| United States | North America | Orofino Id               | Clearwater             | Columbia    | G0537     | GRDC     | 4116301     | 14452                       | 14391                     | 46.478   | -        | 46.45      | -          |
| United States | North America | Spalding Id              | Clearwater             | Columbia    | G0539     | GRDC     | 4116300     | 24786                       | 24326                     | 46.448   | -        | 46.45      | -          |
| United States | North America | Lisbon Nd                | Sheyenne               | Nelson      | G0540     | GRDC     | 4113363     | 21212                       | 12523                     | 46.446   | -        | 46.45      | -97.55     |
| United States | North America | Near Roundup Mt          | Musselshell            | Mississippi | G0541     | GRDC     | 4120321     | 10420                       | 10498                     | 46.428   | -        | 46.45      | -          |
| United States | North America | Miles City Mt            | Tongue                 | Mississippi | G0542     | GRDC     | 4120110     | 13932                       | 13962                     | 46.384   | -        | 46.25      | -          |
| United States | North America | Breien Nd                | Cannonball             | Mississippi | G0544     | GRDC     | 4121120     | 10619                       | 10434                     | 46.376   | -        | 46.35      | -          |
| United States | North America | Marmarth Nd              | Little Missouri        | Mississippi | G0546     | GRDC     | 4121101     | 12018                       | 12334                     | 46.297   | -        | 46.25      | -          |
| United States | North America | Wahpeton Nd              | Red River (Of The      | Nelson      | G0547     | GRDC     | 4113305     | 10386                       | 9753                      | 46.265   | -        | 46.25      | -96.65     |
| United States | North America | Kiona Wa                 | Yakima                 | Columbia    | G0548     | GRDC     | 4115260     | 14543                       | 14760                     | 46.253   | -        | 46.25      | -          |
| United States | North America | Below Ice Harbor Dam     | Snake                  | Columbia    | G0549     | GRDC     | 4116182     | 281015                      | 265110                    | 46.250   | -        | 46.25      | -          |
| United States | North America | Beaver Army Terminal     | Columbia               | Columbia    | G0552     | GRDC     | 4115201     | 665371                      | 663424                    | 46.181   | -        | 46.15      | -          |
| United States | North America | Toston Mt                | Missouri               | Mississippi | G0555     | GRDC     | 4120903     | 37993                       | 38512                     | 46.146   | -        | 46.05      | -          |
| United States | North America | Above Tullock Creek Near | Bighorn                | Mississippi | G0556     | GRDC     | 4120120     | 58052                       | 59198                     | 46.124   | -        | 46.05      | -          |
| United States | North America | Near Anatone Wa          | Snake                  | Columbia    | G0557     | GRDC     | 4116181     | 240766                      | 225429                    | 46.097   | -        | 46.05      | -          |
| United States | North America | Near Three Forks Mt      | Jefferson              | Mississippi | G0563     | GRDC     | 4120330     | 24688                       | 24991                     | 45.897   | -        | 45.85      | -          |
| United States | North America | Billings Mt              | Yellowstone            | Mississippi | G0567     | GRDC     | 4120951     | 30575                       | 31472                     | 45.8     | -        | 45.75      | -          |
| United States | North America | White Bird Id            | Salmon                 | Columbia    | G0569     | GRDC     | 4116330     | 35094                       | 35783                     | 45.750   | -        | 45.75      | -          |
| United States | North America | Little Eagle Sd          | Grand                  | Mississippi | G0571     | GRDC     | 4121420     | 13908                       | 14212                     | 45.657   | -        | 45.65      | -          |
| United States | North America | Moody Near Biggs Or      | Deschutes              | Columbia    | G0572     | GRDC     | 4115280     | 27195                       | 28326                     | 45.622   | -        | 45.55      | -          |
| United States | North America | Near Twin Bridges Mt     | Jefferson              | Mississippi | G0573     | GRDC     | 4120331     | 19767                       | 19918                     | 45.613   | -        | 45.55      | -          |
| United States | North America | The Dalles Or            | Columbia               | Columbia    | G0574     | GRDC     | 4115200     | 613830                      | 612077                    | 45.607   | -        | 45.65      | -          |
| United States | North America | Columbia Sd              | James (Trib. Missouri) | Mississippi | G0575     | GRDC     | 4121303     | 15170                       | 13575                     | 45.603   | -        | 45.75      | -98.25     |
| United States | North America | Mcdonald Ferry Oreg      | John Day               | Columbia    | G0576     | GRDC     | 4115221     | 19632                       | 20150                     | 45.587   | -        | 45.55      | -          |
| United States | North America | Portland Or              | Willamette             | Columbia    | G0580     | GRDC     | 4115101     | 29008                       | 29166                     | 45.518   | -        | 45.45      | -          |
| United States | North America | St Croix Falls Wi        | St. Croix              | Mississippi | G0583     | GRDC     | 4119080     | 16162                       | 16950                     | 45.406   | -        | 45.45      | -92.65     |
| United States | North America | Near Mcallister Wi       | Menominee              | St.Lawrence | G0586     | GRDC     | 4133400     | 10179                       | 10230                     | 45.325   | -        | 45.35      | -87.65     |
| United States | North America | Near Shoup Id            | Salmon                 | Columbia    | G0587     | GRDC     | 4116331     | 16239                       | 16888                     | 45.322   | -        | 45.35      | -          |
| United States | North America | Near Whitehorse Sd       | Moreau                 | Mississippi | G0588     | GRDC     | 4121131     | 12639                       | 12923                     | 45.255   | -        | 45.25      | -          |
| United States | North America | Hells Canyon Dam Id Or   | Snake                  | Columbia    | G0589     | GRDC     | 4116183     | 189847                      | 173540                    | 45.251   | -        | 45.25      | -          |
| United States | North America | West Enfield Me          | Penobscot              | Penobscot   | G0590     | GRDC     | 4147010     | 16633                       | 17546                     | 45.236   | -        | 45.25      | -68.65     |
| United States | North America | Cornwall                 | St. Lawrence           | St.Lawrence | G0597     | GRDC     | 4243150     | 774000                      | 778182                    | 45.005   | -        | 44.55      | -75.75     |
| United States | North America | Ashton Sd                | James (Trib. Missouri) | Mississippi | G0598     | GRDC     | 4121302     | 25232                       | 24904                     | 44.998   | -        | 45.05      | -98.45     |
| United States | North America | Salem Or                 | Willamette             | Columbia    | G0600     | GRDC     | 4115100     | 18855                       | 18624                     | 44.944   | -        | 44.85      | -          |
| United States | North America | St Paul Mn               | Mississippi            | Mississippi | G0601     | GRDC     | 4119100     | 95312                       | 96933                     | 44.933   | -        | 44.95      | -93.05     |
| United States | North America | Montevideo Mn            | Minnesota              | Mississippi | G0602     | GRDC     | 4119461     | 16006                       | 16691                     | 44.933   | -        | 44.95      | -95.75     |
| United States | North America | Chippewa Falls Wi        | Chippewa               | Mississippi | G0603     | GRDC     | 4119441     | 14634                       | 14764                     | 44.926   | -        | 44.95      | -91.35     |

| Country       | Continent     | Station Name            | River Name             | River Basin | GloFAS ID | Provider | Provider ID | Catchment Area Provided km² | Catchment Area GloFAS km² | LAT Prov | LON Prov | LAT GloFAS | LON GloFAS |
|---------------|---------------|-------------------------|------------------------|-------------|-----------|----------|-------------|-----------------------------|---------------------------|----------|----------|------------|------------|
| United States | North America | Rothschild Wi           | Wisconsin              | Mississippi | G0605     | GRDC     | 4119453     | 10412                       | 11106                     | 44.885   | -        | 44.85      | -89.65     |
| United States | North America | Eddington Me            | Penobscot              | Penobscot   | G0607     | GRDC     | 4147011     | 19464                       | 19674                     | 44.828   | -        | 44.95      | -68.65     |
| United States | North America | Service Creek Or        | John Day               | Columbia    | G0609     | GRDC     | 4115220     | 13183                       | 13938                     | 44.793   | -        | 44.75      | -          |
| United States | North America | Kane Wy                 | Bighorn                | Mississippi | G0610     | GRDC     | 4120121     | 40824                       | 41686                     | 44.758   | -        | 44.75      | -          |
| United States | North America | Near Madras Or          | Deschutes              | Columbia    | G0611     | GRDC     | 4115281     | 20254                       | 21483                     | 44.726   | -        | 44.75      | -          |
| United States | North America | Near Jordan Mn          | Minnesota              | Mississippi | G0613     | GRDC     | 4119460     | 41958                       | 42410                     | 44.693   | -        | 44.65      | -93.75     |
| United States | North America | Near Fruitdale Sd       | Belle Fourche          | Mississippi | G0614     | GRDC     | 4121147     | 11759                       | 11770                     | 44.690   | -        | 44.65      | -          |
| United States | North America | Durand Wi               | Chippewa               | Mississippi | G0616     | GRDC     | 4119440     | 23336                       | 23641                     | 44.628   | -        | 44.65      | -91.95     |
| United States | North America | Near Plainview Sd       | Cheyenne               | Mississippi | G0618     | GRDC     | 4121141     | 56048                       | 56092                     | 44.531   | -        | 44.55      | -          |
| United States | North America | Below Opal Springs Near | Crooked                | Columbia    | G0619     | GRDC     | 4115226     | 11137                       | 11914                     | 44.492   | -        | 44.45      | -          |
| United States | North America | North Sidney Me         | Kennebec               | -           | G0620     | GRDC     | 4147051     | 13994                       | 14099                     | 44.472   | -        | 44.55      | -69.65     |
| United States | North America | Wisconsin Rapids Wi     | Wisconsin              | Mississippi | G0621     | GRDC     | 4119452     | 14038                       | 14587                     | 44.394   | -        | 44.45      | -89.75     |
| United States | North America | Near Elm Springs        | Belle Fourche          | Mississippi | G0622     | GRDC     | 4121146     | 18674                       | 18561                     | 44.369   | -        | 44.35      | -          |
| United States | North America | Rapid Croche Dam Near   | Fox                    | St.Lawrence | G0623     | GRDC     | 4133200     | 15566                       | 16151                     | 44.317   | -        | 44.35      | -88.15     |
| United States | North America | Weiser Id               | Snake                  | Columbia    | G0624     | GRDC     | 4116184     | 179228                      | 162832                    | 44.245   | -        | 44.25      | -          |
| United States | North America | Near Brookings Sd       | Big Sioux              | Mississippi | G0625     | GRDC     | 4121321     | 10096                       | 10006                     | 44.18    | -        | 43.85      | -96.65     |
| United States | North America | Near Wasta Sd           | Cheyenne               | Mississippi | G0628     | GRDC     | 4121142     | 33152                       | 33039                     | 44.081   | -        | 44.05      | -          |
| United States | North America | Near Forestburg Sd      | James (Trib. Missouri) | Mississippi | G0630     | GRDC     | 4121301     | 45558                       | 44249                     | 43.973   | -        | 43.95      | -98.05     |
| United States | North America | Nyssa Or                | Snake                  | Columbia    | G0631     | GRDC     | 4116185     | 152033                      | 135979                    | 43.876   | -        | 43.95      | -          |
| United States | North America | Near Kadoka Sd          | White (Trib. Missouri) | Mississippi | G0634     | GRDC     | 4121161     | 12950                       | 12895                     | 43.752   | -        | 43.75      | -          |
| United States | North America | Near Oacoma Sd          | White (Trib. Missouri) | Mississippi | G0635     | GRDC     | 4121160     | 26418                       | 26372                     | 43.748   | -        | 43.75      | -99.55     |
| United States | North America | Below Owyhee Dam Or     | Owyhee                 | Columbia    | G0636     | GRDC     | 4116450     | 28904                       | 28310                     | 43.654   | -        | 43.75      | -          |
| United States | North America | West Lebanon Nh         | Connecticut            | Connecticut | G0637     | GRDC     | 4147462     | 10598                       | 11228                     | 43.646   | -        | 43.65      | -72.35     |
| United States | North America | Wisconsin Dells Wi      | Wisconsin              | Mississippi | G0640     | GRDC     | 4119451     | 20953                       | 21345                     | 43.606   | -        | 43.65      | -89.75     |
| United States | North America | Lock 7 Oswego Ny        | Oswego                 | St.Lawrence | G0641     | GRDC     | 4136400     | 13209                       | 13225                     | 43.451   | -        | 43.45      | -76.55     |
| United States | North America | Below Boysen Reservoir  | Wind                   | Mississippi | G0642     | GRDC     | 4120956     | 19946                       | 20581                     | 43.425   | -        | 43.45      | -          |
| United States | North America | Near Shelley Id         | Snake                  | Columbia    | G0643     | GRDC     | 4116190     | 25356                       | 25235                     | 43.413   | -        | 43.45      | -          |
| United States | North America | Saginaw Mi              | Saginaw                | St.Lawrence | G0644     | GRDC     | 4134400     | 15695                       | 15584                     | 43.412   | -        | 43.55      | -83.95     |
| United States | North America | Near Irwin Id           | Snake                  | Columbia    | G0645     | GRDC     | 4116191     | 13533                       | 13850                     | 43.350   | -        | 43.35      | -          |
| United States | North America | Edgemont Sd             | Cheyenne               | Mississippi | G0646     | GRDC     | 4121140     | 18500                       | 18584                     | 43.305   | -        | 43.35      | -          |
| United States | North America | Near Murphy Id          | Snake                  | Columbia    | G0647     | GRDC     | 4116186     | 108521                      | 94128                     | 43.291   | -        | 43.25      | -          |
| United States | North America | Muscoda Wi              | Wisconsin              | Mississippi | G0648     | GRDC     | 4119450     | 26936                       | 28003                     | 43.198   | -        | 43.15      | -90.45     |
| United States | North America | Near Scotland Sd        | James (Trib. Missouri) | Mississippi | G0649     | GRDC     | 4121300     | 53491                       | 52236                     | 43.185   | -        | 43.15      | -97.65     |
| United States | North America | King Hill Id            | Snake                  | Columbia    | G0652     | GRDC     | 4116187     | 92722                       | 77790                     | 43.002   | -        | 42.95      | -          |
| United States | North America | Grand Rapids Mich       | Grand                  | St.Lawrence | G0653     | GRDC     | 4133750     | 12691                       | 12317                     | 42.964   | -        | 43.05      | -85.55     |
| United States | North America | Near Sparks Nebr        | Niobrara               | Mississippi | G0654     | GRDC     | 4121401     | 18518                       | 20410                     | 42.902   | -        | 42.85      | -          |
| United States | North America | Near Rome Or            | Owyhee                 | Columbia    | G0655     | GRDC     | 4116451     | 20720                       | 20516                     | 42.867   | -        | 42.85      | -          |
| United States | North America | Yankton S D             | Missouri               | Mississippi | G0656     | GRDC     | 4121800     | 723905                      | 720911                    | 42.866   | -        | 42.85      | -97.35     |
| United States | North America | Akron Ia                | Big Sioux              | Mississippi | G0657     | GRDC     | 4121320     | 21818                       | 21382                     | 42.837   | -        | 42.75      | -96.65     |



| Country       | Continent     | Station Name           | River Name   | River Basin       | GloFAS ID | Provider | Provider ID | Catchment Area Provided km² | Catchment Area GloFAS km² | LAT Prov | LON Prov | LAT GloFAS | LON GloFAS |
|---------------|---------------|------------------------|--------------|-------------------|-----------|----------|-------------|-----------------------------|---------------------------|----------|----------|------------|------------|
| United States | North America | Neeley Id              | Snake        | Columbia          | G0658     | GRDC     | 4116189     | 35224                       | 40277                     | 42.768   | -        | 42.75      | -          |
| United States | North America | Green Island N Y       | Hudson       | Hudson            | G0659     | GRDC     | 4147500     | 20953                       | 21320                     | 42.752   | -        | 42.75      | -73.65     |
| United States | North America | Near Verdel Nebr       | Niobrara     | Mississippi       | G0660     | GRDC     | 4121400     | 29992                       | 29880                     | 42.739   | -        | 42.85      | -99.05     |
| United States | North America | Howells Ferry Near     | Snake        | Columbia          | G0661     | GRDC     | 4116188     | 40663                       | 46484                     | 42.673   | -113.5   | 42.65      | -          |
| United States | North America | Orin Wy                | North Platte | Mississippi       | G0662     | GRDC     | 4122153     | 38915                       | 39072                     | 42.650   | -        | 42.65      | -          |
| United States | North America | Below Concord River At | Merrimack    | Merrimack         | G0663     | GRDC     | 4147380     | 12005                       | 12350                     | 42.645   | -        | 42.65      | -71.35     |
| United States | North America | Near Agness Oreg       | Rogue        | Rogue             | G0665     | GRDC     | 4145900     | 10202                       | 10170                     | 42.580   | -        | 42.65      | -          |
| United States | North America | Montague City Ma       | Connecticut  | Connecticut       | G0666     | GRDC     | 4147461     | 20357                       | 21128                     | 42.578   | -        | 42.55      | -72.55     |
| United States | North America | Fort Dodge Ia          | Des Moines   | Mississippi       | G0667     | GRDC     | 4119282     | 10852                       | 10208                     | 42.506   | -        | 42.65      | -94.15     |
| United States | North America | Waterloo Ia            | Cedar        | Mississippi       | G0668     | GRDC     | 4119261     | 13328                       | 13376                     | 42.495   | -        | 42.45      | -92.35     |
| United States | North America | Near Stratford Ia      | Des Moines   | Mississippi       | G0669     | GRDC     | 4119281     | 14121                       | 14634                     | 42.251   | -        | 42.25      | -93.95     |
| United States | North America | Near La Barge Wy       | Green        | Colorado (Pacific | G0670     | GRDC     | 4152553     | 10127                       | 10128                     | 42.192   | -        | 42.15      | -          |
| United States | North America | Keno Or                | Klamath      | Klamath           | G0671     | GRDC     | 4146112     | 10153                       | 10138                     | 42.133   | -        | 42.25      | -          |
| United States | North America | Wyoming Nebraska State | North Platte | Mississippi       | G0673     | GRDC     | 4122152     | 57545                       | 56607                     | 41.988   | -        | 42.05      | -          |
| United States | North America | Thompsonville Ct       | Connecticut  | Connecticut       | G0674     | GRDC     | 4147460     | 25019                       | 25671                     | 41.987   | -        | 42.05      | -72.65     |
| United States | North America | Cedar Rapids Ia        | Cedar        | Mississippi       | G0675     | GRDC     | 4119260     | 16861                       | 16717                     | 41.970   | -        | 42.05      | -91.75     |
| United States | North America | Above Seminole         | North Platte | Mississippi       | G0676     | GRDC     | 4122151     | 10813                       | 11596                     | 41.872   | -        | 41.85      | -          |
| United States | North America | Near Seiad Valley Ca   | Klamath      | Klamath           | G0677     | GRDC     | 4146111     | 17975                       | 18173                     | 41.853   | -        | 41.75      | -          |
| United States | North America | Clinton Ia             | Mississippi  | Mississippi       | G0678     | GRDC     | 4119650     | 221704                      | 226025                    | 41.780   | -        | 41.75      | -90.25     |
| United States | North America | Near Joslin Il         | Rock         | Mississippi       | G0680     | GRDC     | 4119200     | 24732                       | 25460                     | 41.559   | -        | 41.55      | -90.15     |
| United States | North America | Near Green River Wy    | Green        | Colorado (Pacific | G0681     | GRDC     | 4152552     | 36260                       | 19425                     | 41.516   | -        | 41.55      | -          |
| United States | North America | Near Klamath Ca        | Klamath      | Klamath           | G0682     | GRDC     | 4146110     | 31339                       | 31390                     | 41.514   | -124     | 41.25      | -          |
| United States | North America | Waterville Ohio        | Maumee       | St.Lawrence       | G0683     | GRDC     | 4135200     | 16395                       | 16592                     | 41.500   | -        | 41.45      | -83.85     |
| United States | North America | Near Genoa Nebr        | Loup         | Mississippi       | G0685     | GRDC     | 4122630     | 37089                       | 37674                     | 41.418   | -        | 41.35      | -97.85     |
| United States | North America | Near Conesville Ia     | Cedar        | Mississippi       | G0687     | GRDC     | 4119264     | 20168                       | 20080                     | 41.41    | -        | 41.45      | -91.25     |
| United States | North America | Near Duncan Nebr       | Platte       | Mississippi       | G0688     | GRDC     | 4122602     | 153587                      | 154339                    | 41.367   | -        | 40.75      | -98.75     |
| United States | North America | Near Wilmington Il     | Kankakee     | Mississippi       | G0690     | GRDC     | 4119310     | 13338                       | 13300                     | 41.346   | -        | 41.25      | -88.05     |
| United States | North America | Waterloo Ne            | Elkhorn      | Mississippi       | G0691     | GRDC     | 4122100     | 17871                       | 18220                     | 41.293   | -        | 41.55      | -96.45     |
| United States | North America | Near St Paul Nebr      | North Loup   | Mississippi       | G0692     | GRDC     | 4122635     | 11142                       | 11076                     | 41.263   | -        | 41.25      | -98.55     |
| United States | North America | Omaha Ne               | Missouri     | Mississippi       | G0693     | GRDC     | 4121801     | 846306                      | 830459                    | 41.258   | -        | 41.15      | -95.85     |
| United States | North America | Wilkes Barre Pa        | Susquehanna  | Susquehanna       | G0694     | GRDC     | 4147704     | 25796                       | 26106                     | 41.250   | -        | 41.35      | -75.85     |
| United States | North America | Near Keyston Nebr      | North Platte | Mississippi       | G0695     | GRDC     | 4122150     | 75887                       | 78791                     | 41.208   | -        | 41.25      | -          |
| United States | North America | St Paul Nebr           | Middle Loup  | Mississippi       | G0696     | GRDC     | 4122637     | 20914                       | 20314                     | 41.203   | -        | 41.15      | -98.45     |
| United States | North America | Wapello Ia             | Iowa         | Mississippi       | G0699     | GRDC     | 4119250     | 32375                       | 32841                     | 41.178   | -        | 41.15      | -91.15     |
| United States | North America | Roscoe Nebr            | South Platte | Mississippi       | G0700     | GRDC     | 4122130     | 61901                       | 60442                     | 41.125   | -        | 41.15      | -          |
| United States | North America | Henry Il               | Illinois     | Mississippi       | G0701     | GRDC     | 4119401     | 35076                       | 34457                     | 41.107   | -        | 41.15      | -89.35     |
| United States | North America | Near Ashland Ne        | Platte       | Mississippi       | G0702     | GRDC     | 4122601     | 218078                      | 218872                    | 41.062   | -        | 41.15      | -96.35     |
| United States | North America | Louisville Nebr        | Platte       | Mississippi       | G0703     | GRDC     | 4122600     | 221108                      | 223409                    | 41.015   | -        | 41.05      | -96.15     |
| United States | North America | Lewisburg Pa West      | Susquehanna  | Susquehanna       | G0705     | GRDC     | 4147725     | 17734                       | 17511                     | 40.967   | -        | 41.15      | -76.85     |

| Country       | Continent     | Station Name              | River Name   | River Basin       | GloFAS ID | Provider | Provider ID | Catchment Area Provided km² | Catchment Area GloFAS km² | LAT Prov | LON Prov | LAT GloFAS | LON GloFAS |
|---------------|---------------|---------------------------|--------------|-------------------|-----------|----------|-------------|-----------------------------|---------------------------|----------|----------|------------|------------|
| United States | North America | Near Grand Island Nebr    | Platte       | Mississippi       | G0706     | GRDC     | 4122603     | 149314                      | 149597                    | 40.874   | -        | 40.75      | -99.75     |
| United States | North America | Augusta Ia                | Skunk        | Mississippi       | G0707     | GRDC     | 4119270     | 11168                       | 11727                     | 40.753   | -        | 40.75      | -91.25     |
| United States | North America | Keosauqua Ia              | Des Moines   | Mississippi       | G0708     | GRDC     | 4119280     | 36358                       | 36433                     | 40.727   | -        | 40.75      | -91.95     |
| United States | North America | Near Imlay Nv             | Humboldt     | -                 | G0709     | GRDC     | 4118440     | 40155                       | 40143                     | 40.692   | -        | 40.85      | -          |
| United States | North America | Nebraska City Nebr        | Missouri     | Mississippi       | G0710     | GRDC     | 4122650     | 1072154                     | 1056040                   | 40.681   | -        | 40.65      | -95.85     |
| United States | North America | Natrona Pa                | Allegheny    | Mississippi       | G0711     | GRDC     | 4123352     | 29552                       | 29963                     | 40.615   | -        | 40.65      | -79.65     |
| United States | North America | Palisade Nv               | Humboldt     | -                 | G0712     | GRDC     | 4118410     | 13088                       | 12863                     | 40.607   | -        | 40.65      | -          |
| United States | North America | Deerlodge Park Co         | Yampa        | Colorado (Pacific | G0713     | GRDC     | 4152701     | 19839                       | 20289                     | 40.451   | -        | 40.45      | -          |
| United States | North America | Lafayette In              | Wabash       | Mississippi       | G0714     | GRDC     | 4123131     | 18822                       | 18879                     | 40.422   | -        | 40.45      | -86.85     |
| United States | North America | Near Kersey Co            | South Platte | Mississippi       | G0715     | GRDC     | 4122132     | 25017                       | 25227                     | 40.412   | -        | 40.45      | -          |
| United States | North America | Near Jensen Ut            | Green        | Colorado (Pacific | G0716     | GRDC     | 4152551     | 76819                       | 69790                     | 40.409   | -        | 40.15      | -          |
| United States | North America | Keokuk Ia                 | Mississippi  | Mississippi       | G0717     | GRDC     | 4119300     | 308210                      | 314398                    | 40.393   | -        | 40.45      | -91.35     |
| United States | North America | Near Weldon Co            | South Platte | Mississippi       | G0718     | GRDC     | 4122131     | 34162                       | 33033                     | 40.321   | -        | 40.35      | -          |
| United States | North America | Cambridge Nebr            | Republican   | Mississippi       | G0721     | GRDC     | 4122351     | 37451                       | 38545                     | 40.284   | -        | 40.25      | -          |
| United States | North America | Harrisburg Pa             | Susquehanna  | Susquehanna       | G0722     | GRDC     | 4147700     | 62419                       | 62430                     | 40.254   | -        | 40.35      | -76.95     |
| United States | North America | Trenton N J               | Delaware     | Delaware          | G0723     | GRDC     | 4147600     | 17560                       | 17871                     | 40.221   | -        | 40.15      | -74.75     |
| United States | North America | Near Randlett Ut          | Duchesne     | Colorado (Pacific | G0724     | GRDC     | 4152610     | 11000                       | 10303                     | 40.215   | -        | 40.15      | -          |
| United States | North America | Stratton Nebr             | Republican   | Mississippi       | G0725     | GRDC     | 4122352     | 21238                       | 21711                     | 40.141   | -        | 40.15      | -          |
| United States | North America | Near Oakford Il           | Sangamon     | Mississippi       | G0726     | GRDC     | 4119410     | 13191                       | 13230                     | 40.123   | -        | 40.15      | -89.95     |
| United States | North America | Martins Ferry             | Ohio         | Mississippi       | G0727     | GRDC     | 4123301     | 63766                       | 63854                     | 40.105   | -        | 40.35      | -80.65     |
| United States | North America | Rulo Ne                   | Missouri     | Mississippi       | G0729     | GRDC     | 4122903     | 1084845                     | 1073870                   | 40.053   | -        | 40.05      | -95.35     |
| United States | North America | Near Watson Ut            | White        | Colorado (Pacific | G0730     | GRDC     | 4152590     | 10412                       | 10450                     | 39.978   | -        | 39.95      | -          |
| United States | North America | Henderson Co              | South Platte | Mississippi       | G0731     | GRDC     | 4122133     | 12349                       | 12378                     | 39.921   | -        | 39.85      | -          |
| United States | North America | Valley City               | Illinois     | Mississippi       | G0732     | GRDC     | 4119400     | 69267                       | 68535                     | 39.703   | -        | 39.75      | -90.65     |
| United States | North America | Hancock Md                | Potomac      | Potomac           | G0733     | GRDC     | 4147901     | 10593                       | 10944                     | 39.697   | -        | 39.65      | -78.15     |
| United States | North America | Conowingo Md              | Susquehanna  | Susquehanna       | G0734     | GRDC     | 4147703     | 70189                       | 70276                     | 39.657   | -        | 39.95      | -76.45     |
| United States | North America | Mcconnelsville Oh         | Muskingum    | Mississippi       | G0735     | GRDC     | 4123400     | 19223                       | 19345                     | 39.645   | -        | 39.85      | -81.95     |
| United States | North America | Near Sumner Mo            | Grand        | Mississippi       | G0736     | GRDC     | 4122251     | 17819                       | 17081                     | 39.640   | -        | 39.65      | -93.35     |
| United States | North America | Juab Ut                   | Sevier       | -                 | G0739     | GRDC     | 4118850     | 13377                       | 13206                     | 39.374   | -        | 39.35      | -          |
| United States | North America | Clay Center Ks            | Republican   | Mississippi       | G0740     | GRDC     | 4122350     | 63564                       | 64952                     | 39.355   | -        | 39.35      | -97.15     |
| United States | North America | Near Manhattan Ks         | Big Blue     | Mississippi       | G0741     | GRDC     | 4122201     | 24968                       | 25376                     | 39.237   | -        | 39.25      | -96.55     |
| United States | North America | Higby Oh                  | Scioto River | Mississippi       | G0742     | GRDC     | 4123260     | 13289                       | 13326                     | 39.212   | -        | 39.35      | -82.95     |
| United States | North America | Wamego Ks                 | Kansas       | Mississippi       | G0743     | GRDC     | 4122701     | 143175                      | 145845                    | 39.197   | -        | 39.15      | -96.35     |
| United States | North America | Kansas City Mo            | Missouri     | Mississippi       | G0745     | GRDC     | 4122902     | 1253819                     | 1248570                   | 39.111   | -        | 39.15      | -94.45     |
| United States | North America | Green River Utah          | Green        | Colorado (Pacific | G0747     | GRDC     | 4152550     | 116162                      | 116179                    | 38.986   | -        | 38.25      | -          |
| United States | North America | Desoto Kans               | Kansas       | Mississippi       | G0748     | GRDC     | 4122700     | 154768                      | 158145                    | 38.983   | -        | 38.95      | -94.95     |
| United States | North America | Boonville Mo              | Missouri     | Mississippi       | G0749     | GRDC     | 4122901     | 1296813                     | 1296350                   | 38.978   | -        | 38.65      | -92.25     |
| United States | North America | Niles Ks                  | Solomon      | Mississippi       | G0750     | GRDC     | 4122240     | 17534                       | 17474                     | 38.968   | -        | 39.05      | -97.65     |
| United States | North America | Near Washington Dc Little | Potomac      | Potomac           | G0751     | GRDC     | 4147904     | 29940                       | 29867                     | 38.95    | -77.13   | 38.95      | -77.25     |

| Country       | Continent     | Station Name          | River Name         | River Basin       | GloFAS ID | Provider | Provider ID | Catchment Area Provided km² | Catchment Area GloFAS km² | LAT Prov | LON Prov | LAT GloFAS | LON GloFAS |
|---------------|---------------|-----------------------|--------------------|-------------------|-----------|----------|-------------|-----------------------------|---------------------------|----------|----------|------------|------------|
| United States | North America | Near Washington D C   | Potomac            | Potomac           | G0752     | GRDC     | 4147900     | 29940                       | 29867                     | 38.949   | -        | 38.95      | -77.25     |
| United States | North America | Newberry In           | White (Trib. Ohio) | Mississippi       | G0753     | GRDC     | 4123201     | 12142                       | 12026                     | 38.927   | -        | 39.05      | -86.95     |
| United States | North America | Enterprise Ks         | Smoky Hill         | Mississippi       | G0754     | GRDC     | 4122222     | 49883                       | 50758                     | 38.906   | -        | 38.85      | -97.25     |
| United States | North America | Alton Ill             | Mississippi        | Mississippi       | G0755     | GRDC     | 4119800     | 444185                      | 451992                    | 38.885   | -        | 38.95      | -90.45     |
| United States | North America | Near Cisco Utah       | Colorado           | Colorado (Pacific | G0756     | GRDC     | 4152460     | 62419                       | 63802                     | 38.810   | -        | 38.85      | -          |
| United States | North America | Near Cisco Ut         | Dolores            | Colorado (Pacific | G0757     | GRDC     | 4152660     | 11862                       | 11902                     | 38.797   | -        | 38.65      | -          |
| United States | North America | Verona Ca             | Sacramento         | Sacramento        | G0758     | GRDC     | 4146281     | 55040                       | 59159                     | 38.774   | -        | 38.75      | -          |
| United States | North America | Delta Co              | Gunnison           | Colorado (Pacific | G0759     | GRDC     | 4152650     | 14576                       | 14081                     | 38.753   | -        | 38.75      | -          |
| United States | North America | Ellsworth Ks          | Smoky Hill         | Mississippi       | G0760     | GRDC     | 4122220     | 19632                       | 19766                     | 38.726   | -        | 38.75      | -98.45     |
| United States | North America | Hermann Mo            | Missouri           | Mississippi       | G0761     | GRDC     | 4122900     | 1357678                     | 1353180                   | 38.71    | -        | 38.85      | -90.35     |
| United States | North America | Shoals In East Fork   | White (Trib. Ohio) | Mississippi       | G0763     | GRDC     | 4123207     | 12761                       | 12693                     | 38.667   | -        | 38.75      | -86.75     |
| United States | North America | St Louis Mo           | Mississippi        | Mississippi       | G0764     | GRDC     | 4127503     | 1805230                     | 1805460                   | 38.628   | -        | 38.85      | -90.25     |
| United States | North America | Below Gunnison Tunnel | Gunnison           | Colorado (Pacific | G0766     | GRDC     | 4152651     | 10269                       | 10380                     | 38.529   | -        | 38.45      | -          |
| United States | North America | Petersburg In         | White (Trib. Ohio) | Mississippi       | G0767     | GRDC     | 4123202     | 28814                       | 29107                     | 38.510   | -        | 38.55      | -87.25     |
| United States | North America | Mount Carmel Ill      | Wabash             | Mississippi       | G0768     | GRDC     | 4123130     | 74165                       | 72922                     | 38.402   | -        | 38.45      | -87.75     |
| United States | North America | New Athens Il         | Kaskaskia          | Mississippi       | G0769     | GRDC     | 4127200     | 13419                       | 13304                     | 38.329   | -        | 38.35      | -89.85     |
| United States | North America | Louisville Ky         | Ohio               | Mississippi       | G0770     | GRDC     | 4123300     | 236130                      | 236205                    | 38.280   | -        | 38.65      | -85.15     |
| United States | North America | Above Pueblo Co       | Arkansas           | Mississippi       | G0771     | GRDC     | 4125803     | 12095                       | 12020                     | 38.271   | -        | 38.25      | -          |
| United States | North America | Near Bagnell Mo       | Osage              | Mississippi       | G0772     | GRDC     | 4122300     | 36260                       | 36782                     | 38.191   | -        | 38.25      | -92.55     |
| United States | North America | Kanawha Falls Wv      | Kanawha            | Mississippi       | G0773     | GRDC     | 4123268     | 21681                       | 21811                     | 38.138   | -        | 38.15      | -81.35     |
| United States | North America | Above Poison Sp Wash  | Dirty Devil        | Colorado (Pacific | G0774     | GRDC     | 4152620     | 10772                       | 10669                     | 38.094   | -        | 38.25      | -          |
| United States | North America | Above Shell City Mo   | Osage              | Mississippi       | G0775     | GRDC     | 4122301     | 14012                       | 14424                     | 38.055   | -        | 38.05      | -94.25     |
| United States | North America | Near Hutchinson Ks    | Arkansas           | Mississippi       | G0776     | GRDC     | 4125802     | 100777                      | 100837                    | 37.946   | -        | 37.95      | -97.85     |
| United States | North America | Chester Il            | Mississippi        | Mississippi       | G0777     | GRDC     | 4127502     | 1835274                     | 1836050                   | 37.902   | -        | 37.95      | -89.95     |
| United States | North America | Near Vernalis Ca      | San Joaquin        | San Joaquin       | G0780     | GRDC     | 4146360     | 35058                       | 33006                     | 37.676   | -        | 37.45      | -          |
| United States | North America | Cartersville Va       | James              | James             | G0781     | GRDC     | 4148051     | 16206                       | 16289                     | 37.671   | -        | 37.65      | -78.05     |
| United States | North America | Near Richmond Va      | James              | James             | G0782     | GRDC     | 4148050     | 17503                       | 17576                     | 37.563   | -        | 37.55      | -77.45     |
| United States | North America | Near Parsons Ks       | Neosho             | Mississippi       | G0783     | GRDC     | 4125026     | 12704                       | 12864                     | 37.340   | -95.11   | 37.35      | -95.15     |
| United States | North America | Thebes Il             | Mississippi        | Mississippi       | G0785     | GRDC     | 4127501     | 1847188                     | 1845610                   | 37.216   | -        | 37.35      | -89.45     |
| United States | North America | Metropolis Ill        | Ohio               | Mississippi       | G0786     | GRDC     | 4123050     | 525770                      | 529990                    | 37.147   | -        | 37.05      | -88.45     |
| United States | North America | Near Bluff Utah       | San Juan           | Colorado (Pacific | G0787     | GRDC     | 4152600     | 59570                       | 59805                     | 37.146   | -        | 37.15      | -          |
| United States | North America | Arkansas City         | Arkansas           | Mississippi       | G0788     | GRDC     | 4125801     | 113217                      | 113376                    | 37.056   | -        | 37.15      | -97.15     |
| United States | North America | Near Grand Rivers Ky  | Cumberland         | Mississippi       | G0789     | GRDC     | 4123080     | 45579                       | 45489                     | 37.021   | -        | 36.85      | -87.95     |
| United States | North America | Near Forgan Ok        | Cimarron           | Mississippi       | G0790     | GRDC     | 4125064     | 22108                       | 21593                     | 37.011   | -        | 36.95      | -99.95     |
| United States | North America | Four Corners Co       | San Juan           | Colorado (Pacific | G0791     | GRDC     | 4152601     | 37814                       | 37941                     | 37.005   | -        | 36.95      | -          |
| United States | North America | Near Commerce Ok      | Neosho             | Mississippi       | G0793     | GRDC     | 4125027     | 15219                       | 15648                     | 36.928   | -        | 36.95      | -94.95     |
| United States | North America | Littlefield Ariz      | Virgin             | Colorado (Pacific | G0794     | GRDC     | 4152800     | 13183                       | 13150                     | 36.891   | -        | 36.85      | -          |
| United States | North America | Lees Ferry Ariz       | Colorado           | Colorado (Pacific | G0795     | GRDC     | 4152450     | 289562                      | 282319                    | 36.864   | -        | 36.85      | -          |
| United States | North America | Beaver Ok             | Beaver             | Mississippi       | G0796     | GRDC     | 4125560     | 20604                       | 21276                     | 36.822   | -        | 36.75      | -          |



| Country       | Continent     | Station Name            | River Name      | River Basin       | GloFAS ID | Provider | Provider ID | Catchment Area Provided km² | Catchment Area GloFAS km² | LAT Prov | LON Prov | LAT GloFAS | LON GloFAS |
|---------------|---------------|-------------------------|-----------------|-------------------|-----------|----------|-------------|-----------------------------|---------------------------|----------|----------|------------|------------|
| United States | North America | Farmington Nm           | San Juan        | Colorado (Pacific | G0797     | GRDC     | 4152602     | 18752                       | 18256                     | 36.722   | -        | 36.75      | -          |
| United States | North America | Near Glendale Nv        | Muddy           | Colorado (Pacific | G0798     | GRDC     | 4152110     | 17560                       | 18479                     | 36.643   | -        | 36.65      | -          |
| United States | North America | Near Spreckels Ca       | Salinas         | Salinas           | G0799     | GRDC     | 4146400     | 10764                       | 10717                     | 36.631   | -        | 36.55      | -          |
| United States | North America | Near Branson Mo         | White (Trib.    | Mississippi       | G0800     | GRDC     | 4125903     | 10417                       | 11040                     | 36.597   | -        | 36.65      | -93.25     |
| United States | North America | Near Waynoka Ok         | Cimarron        | Mississippi       | G0801     | GRDC     | 4125063     | 34535                       | 34390                     | 36.517   | -        | 36.15      | -98.25     |
| United States | North America | Roanoke Rapids N C      | Roanoke         | Roanoke           | G0802     | GRDC     | 4148090     | 21715                       | 22396                     | 36.460   | -        | 36.45      | -77.65     |
| United States | North America | Below Taos Junction     | Grande          | Bravo             | G0805     | GRDC     | 4151803     | 25201                       | 24910                     | 36.32    | -        | 36.25      | -          |
| United States | North America | Near Claremore Ok       | Verdigris       | Mississippi       | G0806     | GRDC     | 4125050     | 16923                       | 19810                     | 36.307   | -        | 36.25      | -95.75     |
| United States | North America | Old Hickory Dam Tw Tn   | Cumberland      | Mississippi       | G0807     | GRDC     | 4123081     | 30233                       | 30308                     | 36.296   | -        | 36.35      | -86.45     |
| United States | North America | Near Chouteau Ok        | Neosho          | Mississippi       | G0809     | GRDC     | 4125028     | 29873                       | 29834                     | 36.229   | -        | 36.35      | -95.15     |
| United States | North America | Above Little Colorado R | Colorado        | Colorado (Pacific | G0810     | GRDC     | 4152101     | 295964                      | 288810                    | 36.202   | -        | 36.25      | -          |
| United States | North America | Tulsa Ok                | Arkansas        | Mississippi       | G0811     | GRDC     | 4125500     | 193253                      | 188765                    | 36.140   | -        | 36.15      | -96.05     |
| United States | North America | Black Rock Ar           | Black           | Mississippi       | G0812     | GRDC     | 4125941     | 19086                       | 19282                     | 36.104   | -        | 36.15      | -91.05     |
| United States | North America | Canton Ok               | North Canadian  | Mississippi       | G0813     | GRDC     | 4125580     | 32334                       | 32322                     | 36.077   | -        | 36.35      | -99.25     |
| United States | North America | Below Hoover Dam Az Nv  | Colorado        | Colorado (Pacific | G0815     | GRDC     | 4152103     | 444703                      | 432135                    | 36.015   | -        | 35.35      | -          |
| United States | North America | Near Ripley Ok          | Cimarron        | Mississippi       | G0817     | GRDC     | 4125061     | 46566                       | 43173                     | 35.985   | -        | 36.05      | -96.85     |
| United States | North America | Perkins Ok              | Cimarron        | Mississippi       | G0818     | GRDC     | 4125060     | 46237                       | 42165                     | 35.957   | -        | 35.95      | -96.95     |
| United States | North America | Near Dover Ok           | Cimarron        | Mississippi       | G0819     | GRDC     | 4125062     | 40697                       | 38125                     | 35.951   | -        | 35.95      | -97.85     |
| United States | North America | Near Canadian Tx        | Canadian        | Mississippi       | G0820     | GRDC     | 4125551     | 59223                       | 59375                     | 35.935   | -        | 36.05      | -99.85     |
| United States | North America | Near Cameron Ariz       | Little Colorado | Colorado (Pacific | G0821     | GRDC     | 4152465     | 68529                       | 68780                     | 35.926   | -        | 36.15      | -          |
| United States | North America | Otowi Bridge Nm         | Grande          | Bravo             | G0822     | GRDC     | 4151802     | 37037                       | 36881                     | 35.874   | -        | 35.75      | -          |
| United States | North America | Elgin Ferry Ar          | Black           | Mississippi       | G0824     | GRDC     | 4125940     | 21803                       | 21803                     | 35.764   | -        | 35.95      | -91.25     |
| United States | North America | Batesville Ar           | White (Trib.    | Mississippi       | G0825     | GRDC     | 4125902     | 28671                       | 28830                     | 35.759   | -        | 35.75      | -91.65     |
| United States | North America | Newport Ar              | White (Trib.    | Mississippi       | G0826     | GRDC     | 4125901     | 51437                       | 52153                     | 35.605   | -        | 35.65      | -91.35     |
| United States | North America | Near Fort Barnwell Nc   | Neuse           | -                 | G0827     | GRDC     | 4148120     | 10101                       | 10242                     | 35.312   | -        | 35.35      | -77.35     |
| United States | North America | Near Wetumka Ok         | North Canadian  | Mississippi       | G0828     | GRDC     | 4125555     | 37011                       | 38704                     | 35.265   | -        | 35.35      | -96.35     |
| United States | North America | Near Whitefield Ok      | Canadian        | Mississippi       | G0829     | GRDC     | 4125550     | 123222                      | 123917                    | 35.264   | -        | 35.25      | -95.25     |
| United States | North America | Savannah Tn             | Tennessee       | Mississippi       | G0830     | GRDC     | 4123062     | 85833                       | 85800                     | 35.224   | -        | 34.95      | -88.15     |
| United States | North America | Chattanooga Tn          | Tennessee       | Mississippi       | G0831     | GRDC     | 4123063     | 55426                       | 56218                     | 35.086   | -        | 35.05      | -85.25     |
| United States | North America | Near Joseph City Az     | Little Colorado | Colorado (Pacific | G0832     | GRDC     | 4152467     | 32075                       | 32047                     | 34.901   | -        | 34.95      | -          |
| United States | North America | Wilm Near Tarheel Nc    | Cape Fear       | Cape Fear         | G0834     | GRDC     | 4148231     | 12567                       | 12576                     | 34.834   | -        | 34.95      | -78.85     |
| United States | North America | Murray Dam Near Little  | Arkansas        | Mississippi       | G0835     | GRDC     | 4125804     | 409298                      | 409513                    | 34.790   | -        | 34.15      | -91.65     |
| United States | North America | Devalls Bluff Ar        | White (Trib.    | Mississippi       | G0836     | GRDC     | 4125900     | 60686                       | 61097                     | 34.790   | -        | 34.95      | -91.45     |
| United States | North America | Woodruff Az             | Little Colorado | Colorado (Pacific | G0837     | GRDC     | 4152466     | 20906                       | 20951                     | 34.782   | -        | 34.75      | -          |
| United States | North America | Near Puerto De Luna Nm  | Pecos           | Bravo             | G0838     | GRDC     | 4151514     | 10282                       | 9989                      | 34.730   | -        | 34.85      | -          |
| United States | North America | Near Headrick Ok        | North Fork Red  | Mississippi       | G0839     | GRDC     | 4126810     | 10992                       | 10085                     | 34.634   | -        | 34.85      | -99.25     |
| United States | North America | Below Sumner Dam Nm     | Pecos           | Bravo             | G0840     | GRDC     | 4151513     | 11370                       | 10808                     | 34.604   | -        | 34.65      | -          |
| United States | North America | Whitesburg Al           | Tennessee       | Mississippi       | G0841     | GRDC     | 4123061     | 66330                       | 65942                     | 34.571   | -        | 34.45      | -86.45     |
| United States | North America | Near Bernardo Nm        | Puerco          | Bravo             | G0842     | GRDC     | 4151600     | 19036                       | 16406                     | 34.409   | -        | 34.55      | -          |

| Country       | Continent     | Station Name            | River Name        | River Basin       | GloFAS ID | Provider | Provider ID | Catchment Area Provided km² | Catchment Area GloFAS km² | LAT Prov | LON Prov | LAT GloFAS | LON GloFAS |
|---------------|---------------|-------------------------|-------------------|-------------------|-----------|----------|-------------|-----------------------------|---------------------------|----------|----------|------------|------------|
| United States | North America | Lock 1 Near Kelly Nc    | Cape Fear         | Cape Fear         | G0843     | GRDC     | 4148232     | 13610                       | 13909                     | 34.404   | -        | 34.45      | -78.35     |
| United States | North America | Below Taiban Creek Near | Pecos             | Bravo             | G0844     | GRDC     | 4151512     | -                           | 15633                     | 34.332   | -        | 34.35      | -          |
| United States | North America | Near Camden Sc          | Wateree           | Santee            | G0845     | GRDC     | 4148541     | 13131                       | 12935                     | 34.244   | -        | 34.35      | -80.75     |
| United States | North America | Below Alamo Dam Az      | Bill Williams     | Colorado (Pacific | G0846     | GRDC     | 4152120     | 12000                       | 12203                     | 34.230   | -        | 34.25      | -          |
| United States | North America | Peedee S C              | Pee Dee River     | Pee Dee           | G0847     | GRDC     | 4148300     | 22870                       | 23669                     | 34.204   | -        | 34.25      | -79.55     |
| United States | North America | Near Rome Ga            | Coosa             | Alabama River And | G0848     | GRDC     | 4149441     | 10464                       | 10493                     | 34.200   | -        | 34.25      | -85.15     |
| United States | North America | Near Burkburnett Tx     | Red               | Mississippi       | G0849     | GRDC     | 4126803     | 53276                       | 53298                     | 34.110   | -        | 34.15      | -98.75     |
| United States | North America | Below Tangle Creek Abv  | Verde             | Colorado (Pacific | G0850     | GRDC     | 4152400     | 15175                       | 15156                     | 34.073   | -        | 33.85      | -          |
| United States | North America | Columbia Sc             | Congaree          | Santee            | G0851     | GRDC     | 4148530     | 20332                       | 20399                     | 33.993   | -        | 34.05      | -81.05     |
| United States | North America | Arthur City Tx          | Red               | Mississippi       | G0852     | GRDC     | 4126802     | 115335                      | 115667                    | 33.875   | -        | 33.95      | -95.65     |
| United States | North America | Below Eastover Sc       | Wateree           | Santee            | G0853     | GRDC     | 4148540     | 14478                       | 14379                     | 33.828   | -        | 34.05      | -80.65     |
| United States | North America | Denison Dam Near        | Red               | Mississippi       | G0854     | GRDC     | 4126804     | 102875                      | 103595                    | 33.819   | -        | 33.85      | -96.55     |
| United States | North America | Near Gainesville Tx     | Red               | Mississippi       | G0855     | GRDC     | 4126805     | 79725                       | 79957                     | 33.727   | -97.16   | 33.85      | -97.25     |
| United States | North America | Money Ms                | Tallahatchie      | Mississippi       | G0856     | GRDC     | 4127310     | 13522                       | 13468                     | 33.651   | -        | 33.85      | -90.25     |
| United States | North America | Near Roosevelt Ariz     | Salt              | Colorado (Pacific | G0857     | GRDC     | 4152300     | 11152                       | 11287                     | 33.619   | -        | 33.65      | -          |
| United States | North America | Camden Ar               | Ouachita          | Mississippi       | G0858     | GRDC     | 4126701     | 13875                       | 14133                     | 33.596   | -        | 33.65      | -92.85     |
| United States | North America | Seymour Tx              | Brazos            | Brazos            | G0859     | GRDC     | 4150503     | 40243                       | 34462                     | 33.580   | -        | 33.05      | -98.75     |
| United States | North America | Index Ar                | Red               | Mississippi       | G0860     | GRDC     | 4126801     | 124398                      | 124439                    | 33.552   | -        | 33.65      | -94.65     |
| United States | North America | Columbus Ms             | Tombigbee         | Alabama River And | G0861     | GRDC     | 4149411     | 11559                       | 14790                     | 33.490   | -        | 33.35      | -88.35     |
| United States | North America | Near Aspermont Tx       | Salt Fork Brazos  | Brazos            | G0863     | GRDC     | 4150507     | 13287                       | 13252                     | 33.334   | -        | 33.35      | -          |
| United States | North America | Spring Bank Ar          | Red               | Mississippi       | G0865     | GRDC     | 4126806     | -                           | 148904                    | 33.080   | -        | 33.05      | -93.85     |
| United States | North America | Near Ar La State Linine | Ouachita          | Mississippi       | G0866     | GRDC     | 4126702     | 27938                       | 28012                     | 33.031   | -        | 33.15      | -92.15     |
| United States | North America | Near South Bend Tx      | Brazos            | Brazos            | G0867     | GRDC     | 4150502     | 58723                       | 50927                     | 33.024   | -        | 32.95      | -98.55     |
| United States | North America | Near Aspermont Tx       | Dmf Brazos        | Brazos            | G0868     | GRDC     | 4150509     | 22782                       | 14650                     | 33.008   | -        | 33.25      | -          |
| United States | North America | Near Lake Arthur Nm     | Pecos             | Bravo             | G0869     | GRDC     | 4151511     | 38228                       | 38164                     | 32.988   | -        | 31.85      | -          |
| United States | North America | Fort Griffin            | Clear Fork Brazos | Brazos            | G0870     | GRDC     | 4150505     | 10329                       | 10176                     | 32.934   | -        | 33.05      | -99.35     |
| United States | North America | Below Caballo Dam Nm    | Grande            | Bravo             | G0871     | GRDC     | 4151801     | 79513                       | 80737                     | 32.884   | -        | 32.95      | -          |
| United States | North America | Near Dome Az            | Gila              | Colorado (Pacific | G0872     | GRDC     | 4152202     | 149832                      | 149805                    | 32.760   | -        | 32.65      | -          |
| United States | North America | Below Yuma Main Canal   | Colorado          | Colorado (Pacific | G0873     | GRDC     | 4152050     | 618715                      | 624072                    | 32.731   | -        | 32.75      | -          |
| United States | North America | Jordan Dam Near         | Coosa             | Alabama River And | G0876     | GRDC     | 4149440     | 26164                       | 26053                     | 32.614   | -        | 32.75      | -86.35     |
| United States | North America | Near Clyn Ga            | Savannah          | Savannah          | G0877     | GRDC     | 4148650     | 25512                       | 25558                     | 32.528   | -        | 32.45      | -81.25     |
| United States | North America | Demopolis L+D Near      | Tombigbee         | Alabama River And | G0878     | GRDC     | 4149410     | 39847                       | 40274                     | 32.519   | -        | 32.55      | -87.85     |
| United States | North America | Below Steele Bayou Near | Yazoo             | Mississippi       | G0879     | GRDC     | 4127300     | 34590                       | 34371                     | 32.443   | -        | 32.45      | -90.95     |
| United States | North America | Vicksburg Ms            | Mississippi       | Mississippi       | G0880     | GRDC     | 4127800     | 2964255                     | 2963330                   | 32.315   | -        | 32.15      | -91.05     |
| United States | North America | Near Aquilla Tx         | Brazos            | Brazos            | G0882     | GRDC     | 4150501     | 70562                       | 61853                     | 31.812   | -        | 31.75      | -97.35     |
| United States | North America | Coffeerville L+D Near   | Tombigbee         | Alabama River And | G0883     | GRDC     | 4149413     | 47700                       | 47964                     | 31.758   | -        | 31.85      | -88.15     |
| United States | North America | Doctortown Ga           | Altamaha          | Altamaha          | G0884     | GRDC     | 4148720     | 35224                       | 35390                     | 31.654   | -        | 31.75      | -81.95     |
| United States | North America | Clairborne L+D Near     | Alabama           | Alabama River And | G0885     | GRDC     | 4149401     | 55615                       | 55521                     | 31.611   | -        | 31.95      | -87.45     |
| United States | North America | Near Monticello Ms      | Pearl             | Pearl             | G0886     | GRDC     | 4149121     | 12932                       | 13057                     | 31.553   | -        | 31.45      | -90.05     |

| Country       | Continent     | Station Name         | River Name        | River Basin  | GloFAS ID | Provider | Provider ID | Catchment Area Provided km² | Catchment Area GloFAS km² | LAT Prov | LON Prov | LAT GloFAS | LON GloFAS |
|---------------|---------------|----------------------|-------------------|--------------|-----------|----------|-------------|-----------------------------|---------------------------|----------|----------|------------|------------|
| United States | North America | Paint Rock Tx        | Concho            | Colorado     | G0887     | GRDC     | 4150475     | 17027                       | 16898                     | 31.516   | -        | 31.55      | -99.85     |
| United States | North America | Near Girvin          | Pecos             | Bravo        | G0888     | GRDC     | 4151515     | 76560                       | 77482                     | 31.113   | -        | 30.45      | -          |
| United States | North America | Tarbert Landing Ms   | Mississippi       | Mississippi  | G0889     | GRDC     | 4127930     | 3250000                     | 3225540                   | 31.008   | -        | 30.95      | -91.65     |
| United States | North America | Merrill Miss         | Pascagoula        | -            | G0890     | GRDC     | 4149300     | 17068                       | 17152                     | 30.977   | -        | 30.95      | -88.75     |
| United States | North America | Bainbridge Ga        | Flint             | Apalachicola | G0891     | GRDC     | 4149680     | 19606                       | 19511                     | 30.911   | -        | 30.85      | -84.65     |
| United States | North America | Near Bogalusa La     | Pearl             | Pearl        | G0892     | GRDC     | 4149120     | 17024                       | 16364                     | 30.793   | -        | 30.65      | -89.85     |
| United States | North America | Llano Tx             | Llano             | Colorado     | G0894     | GRDC     | 4150460     | 10870                       | 10732                     | 30.751   | -        | 30.75      | -98.65     |
| United States | North America | Chattahoochee Fla    | Apalachicola      | Apalachicola | G0895     | GRDC     | 4149630     | 44548                       | 45344                     | 30.701   | -        | 30.55      | -84.95     |
| United States | North America | Near Molino Fla      | Escambia          | -            | G0896     | GRDC     | 4149421     | 10741                       | 10838                     | 30.668   | -        | 30.65      | -87.25     |
| United States | North America | Graham Ferry Ms      | Pascagoula        | -            | G0897     | GRDC     | 4149301     | 21248                       | 21424                     | 30.610   | -        | 30.65      | -88.65     |
| United States | North America | Near Bruce Fla       | Choctawhatchee    | -            | G0898     | GRDC     | 4149690     | 11355                       | 11180                     | 30.451   | -        | 30.55      | -85.85     |
| United States | North America | Near Blountstown Fla | Apalachicola      | Apalachicola | G0899     | GRDC     | 4149631     | 45584                       | 45559                     | 30.425   | -        | 30.35      | -85.05     |
| United States | North America | Romayor Tex          | Trinity           | Trinity      | G0900     | GRDC     | 4150600     | 44512                       | 44312                     | 30.425   | -        | 30.45      | -94.85     |
| United States | North America | Evadale Tex          | Neches            | -            | G0901     | GRDC     | 4150680     | 20593                       | 21653                     | 30.355   | -        | 30.35      | -94.15     |
| United States | North America | Jacksonville Fla     | St. Johns         | St. Johns    | G0902     | GRDC     | 4148851     | 22922                       | 22773                     | 30.321   | -        | 29.95      | -81.65     |
| United States | North America | Near Ruliff Tex      | Sabine            | Sabine       | G0903     | GRDC     | 4150700     | 24162                       | 23992                     | 30.303   | -        | 30.35      | -93.75     |
| United States | North America | Austin Tx            | Colorado          | Colorado     | G0904     | GRDC     | 4150451     | 101033                      | 99626                     | 30.244   | -        | 30.25      | -97.65     |
| United States | North America | Liberty Tx           | Trinity           | Trinity      | G0905     | GRDC     | 4150601     | 45242                       | 45281                     | 30.057   | -        | 29.95      | -94.85     |
| United States | North America | Branford Fla         | Suwannee          | Suwannee     | G0906     | GRDC     | 4149780     | 20409                       | 20730                     | 29.955   | -        | 30.05      | -83.05     |
| United States | North America | Near Sumatra Fla     | Apalachicola      | Apalachicola | G0907     | GRDC     | 4149632     | 49728                       | 49846                     | 29.949   | -        | 29.95      | -85.05     |
| United States | North America | Near Bell Fla        | Suwannee          | Suwannee     | G0908     | GRDC     | 4149781     | 24320                       | 25477                     | 29.791   | -        | 29.85      | -82.85     |
| United States | North America | Morgan City La       | Lower Atchafalaya | -            | G0909     | GRDC     | 4126250     | -                           | 12238                     | 29.7     | -91.2    | 29.65      | -91.25     |
| United States | North America | Richmond Tex         | Brazos            | Brazos       | G0910     | GRDC     | 4150500     | 116827                      | 113098                    | 29.582   | -        | 28.95      | -95.45     |
| United States | North America | Wharton Tex          | Colorado          | Colorado     | G0912     | GRDC     | 4150450     | 108788                      | 106316                    | 29.309   | -        | 29.25      | -96.15     |
| United States | North America | Victoria Tx          | Guadalupe         | -            | G0913     | GRDC     | 4150310     | 13463                       | 13953                     | 28.793   | -        | 28.75      | -97.05     |
| United States | North America | Goliard Tx           | San Antonio       | San Antonio  | G0914     | GRDC     | 4150330     | 10155                       | 10200                     | 28.649   | -        | 28.65      | -97.55     |
| United States | North America | Near Three Rivers Tx | Nueces            | Nueces       | G0917     | GRDC     | 4150281     | 39956                       | 40120                     | 28.427   | -        | 28.45      | -98.25     |
| United States | North America | Near Tilden Tx       | Nueces            | Nueces       | G0918     | GRDC     | 4150282     | 20961                       | 20741                     | 28.308   | -        | 28.25      | -98.65     |
| United States | North America | Near Mathis Tex      | Nueces            | Nueces       | G0919     | GRDC     | 4150280     | 43149                       | 43190                     | 28.038   | -        | 27.95      | -97.75     |
| United States | North America | Calallen Tx          | Nueces            | Nueces       | G0920     | GRDC     | 4150283     | 43823                       | 43520                     | 27.883   | -        | 27.85      | -97.55     |
| United States | North America | Matamoros            | Grande            | Bravo        | G0926     | GRDC     | 4351900     | 450902                      | 460778                    | 25.9     | -97.52   | 25.95      | -97.55     |
| United States | North America | -                    | Mississippi       | Mississippi  | G1731     | DFO      | 85          | -                           | 2976660                   | 31.814   | -        | 31.85      | -91.35     |
| United States | North America | -                    | Red               | Nelson       | G1732     | DFO      | 87          | -                           | 78280                     | 48.464   | -        | 48.45      | -97.15     |
| United States | North America | -                    | Sacramento        | Sacramento   | G1733     | DFO      | 88          | -                           | 62952                     | 38.654   | -        | 38.65      | -          |
| United States | North America | -                    | Wabash            | Mississippi  | G1734     | DFO      | 91          | -                           | 76645                     | 38.204   | -        | 38.25      | -87.95     |
| United States | North America | -                    | Big Black         | Mississippi  | G1809     | DFO      | 440         | -                           | 6997                      | 32.624   | -        | 32.55      | -90.35     |
| United States | North America | -                    | Ouachita          | Mississippi  | G1810     | DFO      | 442         | -                           | 49348                     | 31.904   | -        | 31.85      | -91.85     |
| United States | North America | -                    | Red               | Mississippi  | G1811     | DFO      | 443         | -                           | 158851                    | 32.354   | -        | 32.35      | -93.65     |
| United States | North America | -                    | Trinity           | Trinity      | G1812     | DFO      | 445         | -                           | 39606                     | 30.914   | -        | 30.95      | -95.65     |

| Country       | Continent     | Station Name | River Name         | River Basin       | GloFAS ID | Provider  | Provider ID | Catchment Area Provided km² | Catchment Area GloFAS km² | LAT Prov | LON Prov | LAT GloFAS | LON GloFAS |
|---------------|---------------|--------------|--------------------|-------------------|-----------|-----------|-------------|-----------------------------|---------------------------|----------|----------|------------|------------|
| United States | North America | -            | Trinity            | Trinity           | G1813     | DFO       | 446         | -                           | 33325                     | 31.724   | -        | 31.75      | -95.85     |
| United States | North America | -            | Trinity            | Trinity           | G1814     | DFO       | 447         | -                           | 17017                     | 32.534   | -        | 32.55      | -96.55     |
| United States | North America | -            | Brazos             | Brazos            | G1815     | DFO       | 449         | -                           | 70861                     | 31.184   | -        | 31.15      | -96.85     |
| United States | North America | -            | Colorado           | Colorado          | G1816     | DFO       | 462         | -                           | 105991                    | 29.384   | -        | 29.35      | -96.35     |
| United States | North America | -            | Alabama            | Alabama River And | G1817     | DFO       | 467         | -                           | 59340                     | 31.364   | -        | 31.35      | -87.75     |
| United States | North America | -            | Missouri           | Mississippi       | G1818     | DFO       | 497         | -                           | 1253220                   | 39.284   | -        | 39.25      | -93.45     |
| United States | North America | -            | Mississippi        | Mississippi       | G1819     | DFO       | 501         | -                           | 377166                    | 38.924   | -        | 38.95      | -90.65     |
| United States | North America | -            | Mississippi        | Mississippi       | G1820     | DFO       | 502         | -                           | 2438100                   | 34.694   | -        | 34.65      | -90.55     |
| United States | North America | -            | Mississippi        | Mississippi       | G1821     | DFO       | 505         | -                           | 2390460                   | 36.314   | -        | 36.25      | -89.55     |
| United States | North America | -            | Mississippi        | Mississippi       | G1822     | DFO       | 507         | -                           | 2390160                   | 36.494   | -        | 36.55      | -89.55     |
| United States | North America | -            | Ohio               | Mississippi       | G1823     | DFO       | 510         | -                           | 257745                    | 37.934   | -        | 37.95      | -87.65     |
| United States | North America | -            | Wabash             | Mississippi       | G1824     | DFO       | 514         | -                           | 35380                     | 38.924   | -        | 38.95      | -87.55     |
| United States | North America | -            | White (Trib. Ohio) | Mississippi       | G1825     | DFO       | 516         | -                           | 12803                     | 38.924   | -        | 38.95      | -87.05     |
| United States | North America | -            | Red                | Nelson            | G1826     | DFO       | 521         | -                           | 82527                     | 48.824   | -        | 48.85      | -97.15     |
| United States | North America | -            | Sagavanirktok      | -                 | G1859     | DFO       | 881         | -                           | 13644                     | 69.974   | -        | 69.95      | -          |
| United States | North America | -            | -                  | -                 | G2109     | Synthetic | -           | -                           | 56625                     | -        | -        | 70.05      | -          |
| United States | North America | -            | -                  | -                 | G2110     | Synthetic | -           | -                           | 5196                      | -        | -        | 70.05      | -          |
| United States | North America | -            | -                  | -                 | G2134     | Synthetic | -           | -                           | 37826                     | -        | -        | 69.45      | -          |
| United States | North America | -            | -                  | -                 | G2135     | Synthetic | -           | -                           | 7203                      | -        | -        | 69.45      | -          |
| United States | North America | -            | -                  | -                 | G2136     | Synthetic | -           | -                           | 7524                      | -        | -        | 69.45      | -          |
| United States | North America | -            | -                  | -                 | G2137     | Synthetic | -           | -                           | 7418                      | -        | -        | 69.45      | -          |
| United States | North America | -            | -                  | -                 | G2138     | Synthetic | -           | -                           | 5336                      | -        | -        | 69.45      | -          |
| United States | North America | -            | -                  | -                 | G2155     | Synthetic | -           | -                           | 10162                     | -        | -        | 68.95      | -          |
| United States | North America | -            | -                  | -                 | G2156     | Synthetic | -           | -                           | 26667                     | -        | -        | 68.95      | -          |
| United States | North America | -            | -                  | -                 | G2157     | Synthetic | -           | -                           | 7716                      | -        | -        | 68.95      | -          |
| United States | North America | -            | -                  | -                 | G2161     | Synthetic | -           | -                           | 5527                      | -        | -        | 68.85      | -          |
| United States | North America | -            | -                  | -                 | G2260     | Synthetic | -           | -                           | 15138                     | -        | -        | 67.25      | -          |
| United States | North America | -            | -                  | -                 | G2266     | Synthetic | -           | -                           | 11826                     | -        | -        | 67.15      | -          |
| United States | North America | -            | -                  | -                 | G2277     | Synthetic | -           | -                           | 11310                     | -        | -        | 67.05      | -          |
| United States | North America | -            | -                  | -                 | G2278     | Synthetic | -           | -                           | 68063                     | -        | -        | 67.05      | -          |
| United States | North America | -            | -                  | -                 | G2287     | Synthetic | -           | -                           | 7453                      | -        | -        | 66.95      | -          |
| United States | North America | -            | -                  | -                 | G2288     | Synthetic | -           | -                           | 11750                     | -        | -        | 66.95      | -          |
| United States | North America | -            | -                  | -                 | G2299     | Synthetic | -           | -                           | 28265                     | -        | -        | 66.75      | -          |
| United States | North America | -            | -                  | -                 | G2307     | Synthetic | -           | -                           | 9507                      | -        | -        | 66.65      | -          |
| United States | North America | -            | -                  | -                 | G2308     | Synthetic | -           | -                           | 20144                     | -        | -        | 66.65      | -          |
| United States | North America | -            | -                  | -                 | G2309     | Synthetic | -           | -                           | 6857                      | -        | -        | 66.65      | -          |
| United States | North America | -            | -                  | -                 | G2316     | Synthetic | -           | -                           | 8060                      | -        | -        | 66.55      | -          |
| United States | North America | -            | -                  | -                 | G2317     | Synthetic | -           | -                           | 36972                     | -        | -        | 66.55      | -          |
| United States | North America | -            | -                  | -                 | G2318     | Synthetic | -           | -                           | 28696                     | -        | -        | 66.55      | -          |

| Country       | Continent     | Station Name | River Name | River Basin | GloFAS ID | Provider  | Provider ID | Catchment Area Provided km <sup>2</sup> | Catchment Area GloFAS km <sup>2</sup> | LAT Prov | LON Prov | LAT GloFAS | LON GloFAS |
|---------------|---------------|--------------|------------|-------------|-----------|-----------|-------------|-----------------------------------------|---------------------------------------|----------|----------|------------|------------|
| United States | North America | -            | -          | -           | G2319     | Synthetic | -           | -                                       | 6671                                  | -        | -        | 66.55      | -          |
| United States | North America | -            | -          | -           | G2320     | Synthetic | -           | -                                       | 39574                                 | -        | -        | 66.55      | -          |
| United States | North America | -            | -          | -           | G2321     | Synthetic | -           | -                                       | 7010                                  | -        | -        | 66.55      | -          |
| United States | North America | -            | -          | -           | G2332     | Synthetic | -           | -                                       | 7801                                  | -        | -        | 66.45      | -          |
| United States | North America | -            | -          | -           | G2333     | Synthetic | -           | -                                       | 58518                                 | -        | -        | 66.45      | -          |
| United States | North America | -            | -          | -           | G2334     | Synthetic | -           | -                                       | 18521                                 | -        | -        | 66.45      | -          |
| United States | North America | -            | -          | -           | G2342     | Synthetic | -           | -                                       | 7257                                  | -        | -        | 66.35      | -          |
| United States | North America | -            | -          | -           | G2355     | Synthetic | -           | -                                       | 66385                                 | -        | -        | 66.25      | -          |
| United States | North America | -            | -          | -           | G2356     | Synthetic | -           | -                                       | 86358                                 | -        | -        | 66.25      | -          |
| United States | North America | -            | -          | -           | G2357     | Synthetic | -           | -                                       | 18537                                 | -        | -        | 66.25      | -          |
| United States | North America | -            | -          | -           | G2358     | Synthetic | -           | -                                       | 7086                                  | -        | -        | 66.25      | -          |
| United States | North America | -            | -          | -           | G2363     | Synthetic | -           | -                                       | 458076                                | -        | -        | 66.15      | -          |
| United States | North America | -            | -          | -           | G2364     | Synthetic | -           | -                                       | 363592                                | -        | -        | 66.15      | -          |
| United States | North America | -            | -          | -           | G2365     | Synthetic | -           | -                                       | 344520                                | -        | -        | 66.15      | -          |
| United States | North America | -            | -          | -           | G2366     | Synthetic | -           | -                                       | 332890                                | -        | -        | 66.15      | -          |
| United States | North America | -            | -          | -           | G2367     | Synthetic | -           | -                                       | 325120                                | -        | -        | 66.15      | -          |
| United States | North America | -            | -          | -           | G2374     | Synthetic | -           | -                                       | 5726                                  | -        | -        | 66.05      | -          |
| United States | North America | -            | -          | -           | G2375     | Synthetic | -           | -                                       | 7556                                  | -        | -        | 66.05      | -          |
| United States | North America | -            | -          | -           | G2385     | Synthetic | -           | -                                       | 55172                                 | -        | -        | 65.95      | -          |
| United States | North America | -            | -          | -           | G2399     | Synthetic | -           | -                                       | 6408                                  | -        | -        | 65.85      | -          |
| United States | North America | -            | -          | -           | G2400     | Synthetic | -           | -                                       | 63098                                 | -        | -        | 65.85      | -          |
| United States | North America | -            | -          | -           | G2445     | Synthetic | -           | -                                       | 316528                                | -        | -        | 65.35      | -          |
| United States | North America | -            | -          | -           | G2468     | Synthetic | -           | -                                       | 540207                                | -        | -        | 65.15      | -          |
| United States | North America | -            | -          | -           | G2482     | Synthetic | -           | -                                       | 121370                                | -        | -        | 65.05      | -          |
| United States | North America | -            | -          | -           | G2496     | Synthetic | -           | -                                       | 87617                                 | -        | -        | 64.95      | -          |
| United States | North America | -            | -          | -           | G2497     | Synthetic | -           | -                                       | 671381                                | -        | -        | 64.95      | -          |
| United States | North America | -            | -          | -           | G2498     | Synthetic | -           | -                                       | 8178                                  | -        | -        | 64.95      | -          |
| United States | North America | -            | -          | -           | G2503     | Synthetic | -           | -                                       | 708556                                | -        | -        | 64.85      | -          |
| United States | North America | -            | -          | -           | G2504     | Synthetic | -           | -                                       | 7621                                  | -        | -        | 64.85      | -          |
| United States | North America | -            | -          | -           | G2505     | Synthetic | -           | -                                       | 19467                                 | -        | -        | 64.85      | -          |
| United States | North America | -            | -          | -           | G2506     | Synthetic | -           | -                                       | 81019                                 | -        | -        | 64.85      | -          |
| United States | North America | -            | -          | -           | G2512     | Synthetic | -           | -                                       | 692865                                | -        | -        | 64.75      | -          |
| United States | North America | -            | -          | -           | G2513     | Synthetic | -           | -                                       | 90818                                 | -        | -        | 64.75      | -          |
| United States | North America | -            | -          | -           | G2518     | Synthetic | -           | -                                       | 19687                                 | -        | -        | 64.65      | -          |
| United States | North America | -            | -          | -           | G2524     | Synthetic | -           | -                                       | 10436                                 | -        | -        | 64.55      | -          |
| United States | North America | -            | -          | -           | G2531     | Synthetic | -           | -                                       | 6063                                  | -        | -        | 64.45      | -          |
| United States | North America | -            | -          | -           | G2541     | Synthetic | -           | -                                       | 7271                                  | -        | -        | 64.35      | -          |
| United States | North America | -            | -          | -           | G2542     | Synthetic | -           | -                                       | 46515                                 | -        | -        | 64.35      | -          |
| United States | North America | -            | -          | -           | G2566     | Synthetic | -           | -                                       | 8652                                  | -        | -        | 64.15      | -          |

| Country       | Continent     | Station Name                | River Name | River Basin | GloFAS ID | Provider  | Provider ID | Catchment Area Provided km² | Catchment Area GloFAS km² | LAT Prov | LON Prov | LAT GloFAS | LON GloFAS |
|---------------|---------------|-----------------------------|------------|-------------|-----------|-----------|-------------|-----------------------------|---------------------------|----------|----------|------------|------------|
| United States | North America | -                           | -          | -           | G2668     | Synthetic | -           | -                           | 20332                     | -        | -        | 63.25      | -          |
| United States | North America | -                           | -          | -           | G2669     | Synthetic | -           | -                           | 9000                      | -        | -        | 63.25      | -          |
| United States | North America | -                           | -          | -           | G2676     | Synthetic | -           | -                           | 8275                      | -        | -        | 63.15      | -          |
| United States | North America | -                           | -          | -           | G2677     | Synthetic | -           | -                           | 8915                      | -        | -        | 63.15      | -          |
| United States | North America | -                           | -          | -           | G2682     | Synthetic | -           | -                           | 16316                     | -        | -        | 63.05      | -          |
| United States | North America | -                           | -          | -           | G2683     | Synthetic | -           | -                           | 8639                      | -        | -        | 63.05      | -          |
| United States | North America | -                           | -          | -           | G2691     | Synthetic | -           | -                           | 30895                     | -        | -        | 62.95      | -          |
| United States | North America | -                           | -          | -           | G2692     | Synthetic | -           | -                           | 9029                      | -        | -        | 62.95      | -          |
| United States | North America | -                           | -          | -           | G2722     | Synthetic | -           | -                           | 15405                     | -        | -        | 62.45      | -          |
| United States | North America | -                           | -          | -           | G2733     | Synthetic | -           | -                           | 6943                      | -        | -        | 62.35      | -          |
| United States | North America | -                           | -          | -           | G2734     | Synthetic | -           | -                           | 12282                     | -        | -        | 62.35      | -          |
| United States | North America | -                           | -          | -           | G2744     | Synthetic | -           | -                           | 821426                    | -        | -        | 62.25      | -          |
| United States | North America | -                           | -          | -           | G2745     | Synthetic | -           | -                           | 37210                     | -        | -        | 62.25      | -          |
| United States | North America | -                           | -          | -           | G2756     | Synthetic | -           | -                           | 18855                     | -        | -        | 62.15      | -          |
| United States | North America | -                           | -          | -           | G2760     | Synthetic | -           | -                           | 8905                      | -        | -        | 62.05      | -          |
| United States | North America | -                           | -          | -           | G2773     | Synthetic | -           | -                           | 872670                    | -        | -        | 61.95      | -          |
| United States | North America | -                           | -          | -           | G2793     | Synthetic | -           | -                           | 42848                     | -        | -        | 61.75      | -          |
| United States | North America | -                           | -          | -           | G2794     | Synthetic | -           | -                           | 8418                      | -        | -        | 61.75      | -          |
| United States | North America | -                           | -          | -           | G2802     | Synthetic | -           | -                           | 64155                     | -        | -        | 61.65      | -          |
| United States | North America | -                           | -          | -           | G2803     | Synthetic | -           | -                           | 18466                     | -        | -        | 61.65      | -          |
| United States | North America | -                           | -          | -           | G2813     | Synthetic | -           | -                           | 10013                     | -        | -        | 61.55      | -          |
| United States | North America | -                           | -          | -           | G2814     | Synthetic | -           | -                           | 9432                      | -        | -        | 61.55      | -          |
| United States | North America | -                           | -          | -           | G2943     | Synthetic | -           | -                           | 10959                     | -        | -        | 59.75      | -          |
| United States | North America | -                           | -          | -           | G2951     | Synthetic | -           | -                           | 13437                     | -        | -        | 59.65      | -          |
| United States | North America | st marys river at sault ste | St. Marys  | St.Lawrence | G3558     | USGS      | 4127885     | 209530                      | 214172                    | 46.498   | -        | 46.45      | -84.45     |
| United States | North America | -                           | -          | -           | G3647     | Synthetic | -           | -                           | 10986                     | -        | -        | 48.25      | -          |
| United States | North America | -                           | -          | -           | G3654     | Synthetic | -           | -                           | 21652                     | -        | -        | 48.15      | -          |
| United States | North America | -                           | -          | -           | G3655     | Synthetic | -           | -                           | 61378                     | -        | -        | 48.15      | -          |
| United States | North America | -                           | -          | -           | G3656     | Synthetic | -           | -                           | 232535                    | -        | -        | 48.15      | -          |
| United States | North America | -                           | -          | -           | G3664     | Synthetic | -           | -                           | 202298                    | -        | -        | 48.05      | -          |
| United States | North America | -                           | -          | -           | G3665     | Synthetic | -           | -                           | 222542                    | -        | -        | 48.05      | -          |
| United States | North America | -                           | -          | -           | G3671     | Synthetic | -           | -                           | 18030                     | -        | -        | 47.95      | -          |
| United States | North America | -                           | -          | -           | G3672     | Synthetic | -           | -                           | 245458                    | -        | -        | 47.95      | -          |
| United States | North America | -                           | -          | -           | G3673     | Synthetic | -           | -                           | 183968                    | -        | -        | 47.85      | -          |
| United States | North America | -                           | -          | -           | G3677     | Synthetic | -           | -                           | 444221                    | -        | -        | 47.75      | -          |
| United States | North America | -                           | -          | -           | G3688     | Synthetic | -           | -                           | 109619                    | -        | -        | 47.55      | -          |
| United States | North America | -                           | -          | -           | G3689     | Synthetic | -           | -                           | 25370                     | -        | -        | 47.55      | -          |
| United States | North America | -                           | -          | -           | G3693     | Synthetic | -           | -                           | 24510                     | -        | -        | 47.45      | -          |
| United States | North America | -                           | -          | -           | G3702     | Synthetic | -           | -                           | 28107                     | -        | -        | 47.25      | -          |



| Country       | Continent     | Station Name | River Name | River Basin | GloFAS ID | Provider  | Provider ID | Catchment Area Provided km <sup>2</sup> | Catchment Area GloFAS km <sup>2</sup> | LAT Prov | LON Prov | LAT GloFAS | LON GloFAS |
|---------------|---------------|--------------|------------|-------------|-----------|-----------|-------------|-----------------------------------------|---------------------------------------|----------|----------|------------|------------|
| United States | North America | -            | -          | -           | G3730     | Synthetic | -           | -                                       | 8847                                  | -        | -        | 46.65      | -          |
| United States | North America | -            | -          | -           | G3731     | Synthetic | -           | -                                       | 130249                                | -        | -        | 46.65      | -          |
| United States | North America | -            | -          | -           | G3732     | Synthetic | -           | -                                       | 35353                                 | -        | -        | 46.65      | -          |
| United States | North America | -            | -          | -           | G3736     | Synthetic | -           | -                                       | 255048                                | -        | -        | 46.55      | -          |
| United States | North America | -            | -          | -           | G3744     | Synthetic | -           | -                                       | 256592                                | -        | -        | 46.35      | -          |
| United States | North America | -            | -          | -           | G3745     | Synthetic | -           | -                                       | 112480                                | -        | -        | 46.35      | -          |
| United States | North America | -            | -          | -           | G3746     | Synthetic | -           | -                                       | 9181                                  | -        | -        | 46.35      | -94.45     |
| United States | North America | -            | -          | -           | G3747     | Synthetic | -           | -                                       | 18356                                 | -        | -        | 46.35      | -94.25     |
| United States | North America | -            | -          | -           | G3750     | Synthetic | -           | -                                       | 275334                                | -        | -        | 46.25      | -          |
| United States | North America | -            | -          | -           | G3757     | Synthetic | -           | -                                       | 37007                                 | -        | -        | 45.95      | -          |
| United States | North America | -            | -          | -           | G3764     | Synthetic | -           | -                                       | 177154                                | -        | -        | 45.85      | -          |
| United States | North America | -            | -          | -           | G3772     | Synthetic | -           | -                                       | 560783                                | -        | -        | 45.75      | -          |
| United States | North America | -            | -          | -           | G3781     | Synthetic | -           | -                                       | 622161                                | -        | -        | 45.65      | -          |
| United States | North America | -            | -          | -           | G3786     | Synthetic | -           | -                                       | 14740                                 | -        | -        | 45.55      | -          |
| United States | North America | -            | -          | -           | G3806     | Synthetic | -           | -                                       | 14603                                 | -        | -        | 45.35      | -          |
| United States | North America | -            | -          | -           | G3826     | Synthetic | -           | -                                       | 557933                                | -        | -        | 44.85      | -          |
| United States | North America | -            | -          | -           | G3827     | Synthetic | -           | -                                       | 20847                                 | -        | -        | 44.85      | -92.75     |
| United States | North America | -            | -          | -           | G3830     | Synthetic | -           | -                                       | 65642                                 | -        | -        | 44.75      | -          |
| United States | North America | -            | -          | -           | G3835     | Synthetic | -           | -                                       | 124772                                | -        | -        | 44.45      | -92.15     |
| United States | North America | -            | -          | -           | G3836     | Synthetic | -           | -                                       | 24624                                 | -        | -        | 44.45      | -92.05     |
| United States | North America | -            | -          | -           | G3838     | Synthetic | -           | -                                       | 19010                                 | -        | -        | 44.35      | -          |
| United States | North America | -            | -          | -           | G3839     | Synthetic | -           | -                                       | 35198                                 | -        | -        | 44.35      | -          |
| United States | North America | -            | -          | -           | G3844     | Synthetic | -           | -                                       | 15358                                 | -        | -        | 44.05      | -69.85     |
| United States | North America | -            | -          | -           | G3847     | Synthetic | -           | -                                       | 9217                                  | -        | -        | 43.95      | -69.95     |
| United States | North America | -            | -          | -           | G3857     | Synthetic | -           | -                                       | 9988                                  | -        | -        | 43.75      | -          |
| United States | North America | -            | -          | -           | G3882     | Synthetic | -           | -                                       | 177472                                | -        | -        | 43.05      | -91.15     |
| United States | North America | -            | -          | -           | G3884     | Synthetic | -           | -                                       | 80732                                 | -        | -        | 42.95      | -          |
| United States | North America | -            | -          | -           | G3885     | Synthetic | -           | -                                       | 31469                                 | -        | -        | 42.95      | -91.05     |
| United States | North America | -            | -          | -           | G3887     | Synthetic | -           | -                                       | 682285                                | -        | -        | 42.85      | -98.15     |
| United States | North America | -            | -          | -           | G3890     | Synthetic | -           | -                                       | 34200                                 | -        | -        | 42.65      | -98.15     |
| United States | North America | -            | -          | -           | G3891     | Synthetic | -           | -                                       | 784007                                | -        | -        | 42.55      | -96.55     |
| United States | North America | -            | -          | -           | G3892     | Synthetic | -           | -                                       | 22027                                 | -        | -        | 42.55      | -96.45     |
| United States | North America | -            | -          | -           | G3893     | Synthetic | -           | -                                       | 42496                                 | -        | -        | 42.25      | -          |
| United States | North America | -            | -          | -           | G3897     | Synthetic | -           | -                                       | 10862                                 | -        | -        | 42.15      | -          |
| United States | North America | -            | -          | -           | G3899     | Synthetic | -           | -                                       | 810557                                | -        | -        | 41.85      | -96.15     |
| United States | North America | -            | -          | -           | G3900     | Synthetic | -           | -                                       | 12145                                 | -        | -        | 41.85      | -96.05     |
| United States | North America | -            | -          | -           | G3902     | Synthetic | -           | -                                       | 16870                                 | -        | -        | 41.65      | -93.65     |
| United States | North America | -            | -          | -           | G3907     | Synthetic | -           | -                                       | 40012                                 | -        | -        | 41.45      | -97.45     |
| United States | North America | -            | -          | -           | G3908     | Synthetic | -           | -                                       | 28650                                 | -        | -        | 41.45      | -90.55     |



| Country       | Continent     | Station Name | River Name | River Basin | GloFAS ID | Provider  | Provider ID | Catchment Area Provided km <sup>2</sup> | Catchment Area GloFAS km <sup>2</sup> | LAT Prov | LON Prov | LAT GloFAS | LON GloFAS |
|---------------|---------------|--------------|------------|-------------|-----------|-----------|-------------|-----------------------------------------|---------------------------------------|----------|----------|------------|------------|
| United States | North America | -            | -          | -           | G3910     | Synthetic | -           | -                                       | 9576                                  | -        | -        | 41.35      | -          |
| United States | North America | -            | -          | -           | G3911     | Synthetic | -           | -                                       | 156606                                | -        | -        | 41.35      | -97.45     |
| United States | North America | -            | -          | -           | G3927     | Synthetic | -           | -                                       | 12408                                 | -        | -        | 40.95      | -          |
| United States | North America | -            | -          | -           | G3928     | Synthetic | -           | -                                       | 18645                                 | -        | -        | 40.95      | -76.85     |
| United States | North America | -            | -          | -           | G3929     | Synthetic | -           | -                                       | 29692                                 | -        | -        | 40.95      | -76.75     |
| United States | North America | -            | -          | -           | G3940     | Synthetic | -           | -                                       | 22037                                 | -        | -        | 40.75      | -          |
| United States | North America | -            | -          | -           | G3946     | Synthetic | -           | -                                       | 44550                                 | -        | -        | 40.65      | -          |
| United States | North America | -            | -          | -           | G3951     | Synthetic | -           | -                                       | 21146                                 | -        | -        | 40.45      | -          |
| United States | North America | -            | -          | -           | G3952     | Synthetic | -           | -                                       | 37288                                 | -        | -        | 40.45      | -91.55     |
| United States | North America | -            | -          | -           | G3953     | Synthetic | -           | -                                       | 31009                                 | -        | -        | 40.45      | -79.95     |
| United States | North America | -            | -          | -           | G3963     | Synthetic | -           | -                                       | 19786                                 | -        | -        | 40.35      | -79.95     |
| United States | North America | -            | -          | -           | G3976     | Synthetic | -           | -                                       | 40831                                 | -        | -        | 40.25      | -99.65     |
| United States | North America | -            | -          | -           | G3984     | Synthetic | -           | -                                       | 47458                                 | -        | -        | 40.15      | -90.35     |
| United States | North America | -            | -          | -           | G3988     | Synthetic | -           | -                                       | 14092                                 | -        | -        | 40.05      | -90.35     |
| United States | North America | -            | -          | -           | G4008     | Synthetic | -           | -                                       | 21302                                 | -        | -        | 39.45      | -93.25     |
| United States | North America | -            | -          | -           | G4009     | Synthetic | -           | -                                       | 21850                                 | -        | -        | 39.45      | -81.45     |
| United States | North America | -            | -          | -           | G4013     | Synthetic | -           | -                                       | 1254090                               | -        | -        | 39.35      | -93.25     |
| United States | North America | -            | -          | -           | G4014     | Synthetic | -           | -                                       | 71258                                 | -        | -        | 39.35      | -81.35     |
| United States | North America | -            | -          | -           | G4021     | Synthetic | -           | -                                       | 22874                                 | -        | -        | 39.25      | -          |
| United States | North America | -            | -          | -           | G4025     | Synthetic | -           | -                                       | 10591                                 | -        | -        | 39.15      | -          |
| United States | North America | -            | -          | -           | G4026     | Synthetic | -           | -                                       | 65727                                 | -        | -        | 39.15      | -96.95     |
| United States | North America | -            | -          | -           | G4027     | Synthetic | -           | -                                       | 14305                                 | -        | -        | 39.15      | -84.85     |
| United States | North America | -            | -          | -           | G4028     | Synthetic | -           | -                                       | 200994                                | -        | -        | 39.15      | -84.75     |
| United States | North America | -            | -          | -           | G4032     | Synthetic | -           | -                                       | 23412                                 | -        | -        | 39.05      | -          |
| United States | North America | -            | -          | -           | G4033     | Synthetic | -           | -                                       | 158825                                | -        | -        | 39.05      | -94.65     |
| United States | North America | -            | -          | -           | G4034     | Synthetic | -           | -                                       | 190704                                | -        | -        | 39.05      | -84.45     |
| United States | North America | -            | -          | -           | G4037     | Synthetic | -           | -                                       | 20824                                 | -        | -        | 38.95      | -          |
| United States | North America | -            | -          | -           | G4038     | Synthetic | -           | -                                       | 17863                                 | -        | -        | 38.95      | -97.45     |
| United States | North America | -            | -          | -           | G4039     | Synthetic | -           | -                                       | 52702                                 | -        | -        | 38.95      | -96.85     |
| United States | North America | -            | -          | -           | G4040     | Synthetic | -           | -                                       | 106489                                | -        | -        | 38.95      | -82.15     |
| United States | North America | -            | -          | -           | G4048     | Synthetic | -           | -                                       | 17496                                 | -        | -        | 38.75      | -83.05     |
| United States | North America | -            | -          | -           | G4049     | Synthetic | -           | -                                       | 31513                                 | -        | -        | 38.75      | -82.05     |
| United States | North America | -            | -          | -           | G4056     | Synthetic | -           | -                                       | 163404                                | -        | -        | 38.65      | -83.05     |
| United States | North America | -            | -          | -           | G4066     | Synthetic | -           | -                                       | 39237                                 | -        | -        | 38.45      | -92.05     |
| United States | North America | -            | -          | -           | G4067     | Synthetic | -           | -                                       | 10530                                 | -        | -        | 38.45      | -90.35     |
| United States | North America | -            | -          | -           | G4068     | Synthetic | -           | -                                       | 1808390                               | -        | -        | 38.45      | -90.25     |
| United States | North America | -            | -          | -           | G4069     | Synthetic | -           | -                                       | 11490                                 | -        | -        | 38.35      | -82.65     |
| United States | North America | -            | -          | -           | G4070     | Synthetic | -           | -                                       | 147315                                | -        | -        | 38.35      | -82.55     |
| United States | North America | -            | -          | -           | G4072     | Synthetic | -           | -                                       | 79358                                 | -        | -        | 38.15      | -          |

| Country       | Continent     | Station Name | River Name | River Basin | GloFAS ID | Provider  | Provider ID | Catchment Area Provided km² | Catchment Area GloFAS km² | LAT Prov | LON Prov | LAT GloFAS | LON GloFAS |
|---------------|---------------|--------------|------------|-------------|-----------|-----------|-------------|-----------------------------|---------------------------|----------|----------|------------|------------|
| United States | North America | -            | -          | -           | G4076     | Synthetic | -           | -                           | 47884                     | -        | -        | 38.05      | -          |
| United States | North America | -            | -          | -           | G4079     | Synthetic | -           | -                           | 11849                     | -        | -        | 37.95      | -          |
| United States | North America | -            | -          | -           | G4081     | Synthetic | -           | -                           | 187735                    | -        | -        | 37.85      | -          |
| United States | North America | -            | -          | -           | G4082     | Synthetic | -           | -                           | 86031                     | -        | -        | 37.85      | -88.05     |
| United States | North America | -            | -          | -           | G4083     | Synthetic | -           | -                           | 23770                     | -        | -        | 37.85      | -87.45     |
| United States | North America | -            | -          | -           | G4097     | Synthetic | -           | -                           | 210161                    | -        | -        | 37.25      | -          |
| United States | North America | -            | -          | -           | G4103     | Synthetic | -           | -                           | 64882                     | -        | -        | 37.15      | -          |
| United States | North America | -            | -          | -           | G4109     | Synthetic | -           | -                           | 534871                    | -        | -        | 37.05      | -89.15     |
| United States | North America | -            | -          | -           | G4119     | Synthetic | -           | -                           | 21853                     | -        | -        | 36.75      | -          |
| United States | North America | -            | -          | -           | G4122     | Synthetic | -           | -                           | 11096                     | -        | -        | 36.65      | -          |
| United States | North America | -            | -          | -           | G4123     | Synthetic | -           | -                           | 121011                    | -        | -        | 36.65      | -97.05     |
| United States | North America | -            | -          | -           | G4125     | Synthetic | -           | -                           | 15747                     | -        | -        | 36.55      | -          |
| United States | North America | -            | -          | -           | G4126     | Synthetic | -           | -                           | 17042                     | -        | -        | 36.55      | -97.15     |
| United States | North America | -            | -          | -           | G4133     | Synthetic | -           | -                           | 36335                     | -        | -        | 36.25      | -          |
| United States | North America | -            | -          | -           | G4134     | Synthetic | -           | -                           | 143776                    | -        | -        | 36.25      | -96.35     |
| United States | North America | -            | -          | -           | G4137     | Synthetic | -           | -                           | 44586                     | -        | -        | 36.15      | -96.35     |
| United States | North America | -            | -          | -           | G4145     | Synthetic | -           | -                           | 11946                     | -        | -        | 35.95      | -          |
| United States | North America | -            | -          | -           | G4146     | Synthetic | -           | -                           | 13257                     | -        | -        | 35.95      | -83.75     |
| United States | North America | -            | -          | -           | G4152     | Synthetic | -           | -                           | 21323                     | -        | -        | 35.85      | -95.35     |
| United States | North America | -            | -          | -           | G4153     | Synthetic | -           | -                           | 32958                     | -        | -        | 35.85      | -95.25     |
| United States | North America | -            | -          | -           | G4157     | Synthetic | -           | -                           | 192102                    | -        | -        | 35.75      | -95.45     |
| United States | North America | -            | -          | -           | G4158     | Synthetic | -           | -                           | 32540                     | -        | -        | 35.75      | -84.45     |
| United States | North America | -            | -          | -           | G4160     | Synthetic | -           | -                           | 248208                    | -        | -        | 35.55      | -95.15     |
| United States | North America | -            | -          | -           | G4161     | Synthetic | -           | -                           | 47435                     | -        | -        | 35.35      | -95.65     |
| United States | North America | -            | -          | -           | G4163     | Synthetic | -           | -                           | 75565                     | -        | -        | 35.25      | -95.65     |
| United States | North America | -            | -          | -           | G4197     | Synthetic | -           | -                           | 27665                     | -        | -        | 34.45      | -99.35     |
| United States | North America | -            | -          | -           | G4198     | Synthetic | -           | -                           | 13561                     | -        | -        | 34.45      | -99.25     |
| United States | North America | -            | -          | -           | G4204     | Synthetic | -           | -                           | 443388                    | -        | -        | 34.35      | -          |
| United States | North America | -            | -          | -           | G4206     | Synthetic | -           | -                           | 14262                     | -        | -        | 34.25      | -          |
| United States | North America | -            | -          | -           | G4207     | Synthetic | -           | -                           | 41844                     | -        | -        | 34.25      | -99.25     |
| United States | North America | -            | -          | -           | G4219     | Synthetic | -           | -                           | 72540                     | -        | -        | 34.05      | -91.15     |
| United States | North America | -            | -          | -           | G4220     | Synthetic | -           | -                           | 2439340                   | -        | -        | 34.05      | -90.95     |
| United States | North America | -            | -          | -           | G4229     | Synthetic | -           | -                           | 413009                    | -        | -        | 33.85      | -91.15     |
| United States | North America | -            | -          | -           | G4230     | Synthetic | -           | -                           | 14896                     | -        | -        | 33.85      | -80.65     |
| United States | North America | -            | -          | -           | G4231     | Synthetic | -           | -                           | 2512400                   | -        | -        | 33.75      | -91.05     |
| United States | North America | -            | -          | -           | G4232     | Synthetic | -           | -                           | 21952                     | -        | -        | 33.75      | -80.75     |
| United States | North America | -            | -          | -           | G4234     | Synthetic | -           | -                           | 16296                     | -        | -        | 33.65      | -          |
| United States | North America | -            | -          | -           | G4235     | Synthetic | -           | -                           | 10831                     | -        | -        | 33.65      | -93.95     |
| United States | North America | -            | -          | -           | G4236     | Synthetic | -           | -                           | 16258                     | -        | -        | 33.55      | -          |

| Country       | Continent     | Station Name | River Name | River Basin       | GloFAS ID | Provider  | Provider ID | Catchment Area Provided km <sup>2</sup> | Catchment Area GloFAS km <sup>2</sup> | LAT Prov | LON Prov | LAT GloFAS | LON GloFAS |
|---------------|---------------|--------------|------------|-------------------|-----------|-----------|-------------|-----------------------------------------|---------------------------------------|----------|----------|------------|------------|
| United States | North America | -            | -          | -                 | G4237     | Synthetic | -           | -                                       | 126516                                | -        | -        | 33.55      | -93.95     |
| United States | North America | -            | -          | -                 | G4238     | Synthetic | -           | -                                       | 34631                                 | -        | -        | 33.45      | -          |
| United States | North America | -            | -          | -                 | G4242     | Synthetic | -           | -                                       | 77230                                 | -        | -        | 33.25      | -          |
| United States | North America | -            | -          | -                 | G4244     | Synthetic | -           | -                                       | 22262                                 | -        | -        | 33.15      | -          |
| United States | North America | -            | -          | -                 | G4245     | Synthetic | -           | -                                       | 52155                                 | -        | -        | 33.15      | -          |
| United States | North America | -            | -          | -                 | G4248     | Synthetic | -           | -                                       | 35410                                 | -        | -        | 33.05      | -          |
| United States | North America | -            | -          | -                 | G4253     | Synthetic | -           | -                                       | 11409                                 | -        | -        | 32.85      | -          |
| United States | North America | -            | -          | Alabama River And | G4263     | Synthetic | -           | -                                       | 26683                                 | -        | -        | 32.55      | -86.25     |
| United States | North America | -            | -          | Alabama River And | G4270     | Synthetic | -           | -                                       | 12337                                 | -        | -        | 32.45      | -86.25     |
| United States | North America | -            | -          | -                 | G4281     | Synthetic | -           | -                                       | 13656                                 | -        | -        | 32.05      | -82.65     |
| United States | North America | -            | -          | -                 | G4287     | Synthetic | -           | -                                       | 15938                                 | -        | -        | 31.95      | -82.65     |
| United States | North America | -            | -          | -                 | G4305     | Synthetic | -           | -                                       | 63716                                 | -        | -        | 31.35      | -91.85     |
| United States | North America | -            | -          | -                 | G4314     | Synthetic | -           | -                                       | 177506                                | -        | -        | 31.25      | -91.95     |
| United States | North America | -            | -          | -                 | G4336     | Synthetic | -           | -                                       | 19793                                 | -        | -        | 30.85      | -96.75     |
| United States | North America | -            | -          | -                 | G4340     | Synthetic | -           | -                                       | 22523                                 | -        | -        | 30.75      | -84.95     |
| United States | North America | -            | -          | -                 | G4365     | Synthetic | -           | -                                       | 9649                                  | -        | -        | 30.95      | -94.15     |
| United States | North America | -            | -          | -                 | G4366     | Synthetic | -           | -                                       | 19606                                 | -        | -        | 31.05      | -93.55     |
| United States | North America | -            | -          | -                 | G4370     | Synthetic | -           | -                                       | 223949                                | -        | -        | 29.75      | -          |
| United States | North America | -            | -          | -                 | G4371     | Synthetic | -           | -                                       | 82961                                 | -        | -        | 29.75      | -          |
| United States | North America | -            | -          | -                 | G4427     | Synthetic | -           | -                                       | 11074                                 | -        | -        | 28.55      | -97.05     |
| United States | North America | -            | -          | -                 | G4508     | Synthetic | -           | -                                       | 421348                                | -        | -        | 26.35      | -98.95     |
| United States | North America | -            | -          | -                 | G5038     | Synthetic | -           | -                                       | 13916                                 | -        | -        | 26.85      | -81.15     |
| United States | North America | -            | -          | -                 | G5088     | Synthetic | -           | -                                       | 3952                                  | -        | -        | 27.75      | -81.15     |
| United States | North America | -            | -          | -                 | G5089     | Synthetic | -           | -                                       | 1766                                  | -        | -        | 27.25      | -81.15     |

Table 6: GloFAS diagnostic points for South America.

| Country   | Continent     | Station Name   | River Name | River Basin | GloFAS ID | Provider | Provider ID | Catchment Area Provided km <sup>2</sup> | Catchment Area GloFAS km <sup>2</sup> | LAT Prov | LON Prov | LAT GloFAS | LON GloFAS |
|-----------|---------------|----------------|------------|-------------|-----------|----------|-------------|-----------------------------------------|---------------------------------------|----------|----------|------------|------------|
| Argentina | South America | Salto          | Uruguay    | Uruguay     | G1477     | GRDC     | 3469050     | 244000                                  | 244517                                | -31.38   | -57.93   | -32.15     | -58.15     |
| Argentina | South America | -              | Uruguay    | Uruguay     | G1839     | DFO      | 794         | -                                       | 229122                                | -        | -        | -31.45     | -58.05     |
| Argentina | South America | Timbues        | Parana     | Parana      | G1840     | DFO      | 809         | -                                       | 2429360                               | -        | -        | -32.65     | -60.75     |
| Argentina | South America | -              | Parana     | Parana      | G1841     | DFO      | 810         | -                                       | 2382690                               | -        | -        | -31.85     | -60.65     |
| Argentina | South America | -              | Parana     | Parana      | G1842     | DFO      | 818         | -                                       | 2147910                               | -        | -        | -30.45     | -59.65     |
| Argentina | South America | -              | Parana     | Parana      | G1843     | DFO      | 821         | -                                       | 2111720                               | -        | -        | -29.25     | -59.45     |
| Argentina | South America | Empedrado      | Parana     | Parana      | G1844     | BDHI     | 13885       | -                                       | 2065560                               | -        | -        | -28.05     | -58.95     |
| Argentina | South America | Garruchos      | Uruguay    | Uruguay     | G1846     | BDHI     | 13857       | -                                       | 112411                                | -        | -        | -28.35     | -55.75     |
| Argentina | South America | Puerto Bermejo | Paraguay   | Parana      | G1855     | BDHI     | 12401       | -                                       | 1109300                               | -        | -        | -26.95     | -58.45     |

| Country   | Continent     | Station Name              | River Name        | River Basin | GloFAS ID | Provider  | Provider ID | Catchment Area Provided km² | Catchment Area GloFAS km² | LAT Prov | LON Prov | LAT GloFAS | LON GloFAS |
|-----------|---------------|---------------------------|-------------------|-------------|-----------|-----------|-------------|-----------------------------|---------------------------|----------|----------|------------|------------|
| Argentina | South America | -                         | Birnejo           | Parana      | G1887     | DFO       | 1159        | -                           | 66193                     | -        | -        | -24.95     | -60.95     |
| Argentina | South America | -                         | Bajo De La Tierra | -           | G1888     | DFO       | 1193        | -                           | 17111                     | -        | -        | -42.85     | -66.85     |
| Argentina | South America | Charles Fuhr              | Santa Cruz        | Patagonia   | G2002     | BDHI      | 12802       | -                           | 11888                     | -        | -        | -50.25     | -71.85     |
| Argentina | South America | Pozo Sarmiento            | Bermejo           | Parana      | G5886     | BDHI      | 10693       | -                           | 23350                     | -        | -64.2    | -23.15     | -64.25     |
| Argentina | South America | Caimancito                | San Francisco     | Parana      | G5888     | BDHI      | 10016       | -                           | 21840                     | -        | -        | -23.65     | -64.45     |
| Argentina | South America | El Soberbio               | Uruguay           | Uruguay     | G5905     | BDHI      | 13442       | -                           | 79963                     | -        | -        | -27.35     | -54.25     |
| Argentina | South America | -                         | -                 | -           | G5917     | Synthetic | -           | -                           | 113770                    | -        | -        | -25.25     | -57.75     |
| Argentina | South America | -                         | -                 | -           | G5921     | Synthetic | -           | -                           | 37398                     | -        | -        | -25.35     | -59.05     |
| Argentina | South America | -                         | -                 | -           | G5924     | Synthetic | -           | -                           | 11148                     | -        | -        | -25.45     | -59.05     |
| Argentina | South America | -                         | -                 | -           | G5926     | Synthetic | -           | -                           | 30384                     | -        | -        | -25.55     | -60.45     |
| Argentina | South America | -                         | -                 | -           | G5927     | Synthetic | -           | -                           | 68004                     | -        | -        | -25.55     | -60.25     |
| Argentina | South America | -                         | -                 | -           | G5930     | Synthetic | -           | -                           | 15218                     | -        | -        | -25.65     | -60.45     |
| Argentina | South America | -                         | -                 | -           | G5931     | Synthetic | -           | -                           | 46452                     | -        | -        | -25.65     | -60.25     |
| Argentina | South America | -                         | -                 | -           | G5933     | Synthetic | -           | -                           | 883893                    | -        | -        | -25.75     | -57.75     |
| Argentina | South America | -                         | -                 | -           | G5935     | Synthetic | -           | -                           | 52368                     | -        | -        | -25.85     | -57.95     |
| Argentina | South America | El Colorado               | Bermejo           | Parana      | G5946     | BDHI      | 2602        | -                           | 116143                    | -        | -        | -26.35     | -59.35     |
| Argentina | South America | Corrientes                | Parana            | Parana      | G5963     | BDHI      | 13805       | -                           | 2063090                   | -        | -        | -27.55     | -58.85     |
| Argentina | South America | Itati                     | Parana            | Parana      | G5964     | BDHI      | 13862       | -                           | 920173                    | -        | -        | -27.25     | -58.25     |
| Argentina | South America | -                         | -                 | -           | G5966     | Synthetic | -           | -                           | 18305                     | -        | -        | -27.45     | -58.95     |
| Argentina | South America | -                         | -                 | -           | G5967     | Synthetic | -           | -                           | 15004                     | -        | -        | -27.55     | -63.65     |
| Argentina | South America | -                         | -                 | -           | G5968     | Synthetic | -           | -                           | 53625                     | -        | -        | -27.55     | -63.55     |
| Argentina | South America | Porto Lucena              | Uruguay           | Uruguay     | G5977     | CEMADE    | 7480000     | -                           | 90069                     | -        | -        | -27.75     | -55.05     |
| Argentina | South America | -                         | -                 | -           | G5985     | Synthetic | -           | -                           | 72325                     | -        | -        | -28.45     | -62.95     |
| Argentina | South America | -                         | -                 | -           | G5986     | Synthetic | -           | -                           | 20167                     | -        | -        | -28.45     | -62.85     |
| Argentina | South America | -                         | -                 | -           | G5988     | Synthetic | -           | -                           | 22293                     | -        | -        | -28.55     | -66.65     |
| Argentina | South America | -                         | -                 | -           | G5992     | Synthetic | -           | -                           | 31538                     | -        | -        | -28.95     | -63.45     |
| Argentina | South America | Brazo Secundario Isla     | Parana            | Parana      | G5993     | BDHI      | 13809       | -                           | 2118330                   | -        | -59.55   | -29.55     | -59.55     |
| Argentina | South America | -                         | -                 | -           | G5995     | Synthetic | -           | -                           | 24268                     | -        | -        | -29.05     | -63.55     |
| Argentina | South America | -                         | -                 | -           | G5996     | Synthetic | -           | -                           | 17060                     | -        | -        | -29.05     | -59.35     |
| Argentina | South America | -                         | -                 | -           | G6005     | Synthetic | -           | -                           | 21744                     | -        | -        | -29.75     | -66.25     |
| Argentina | South America | -                         | -                 | -           | G6006     | Synthetic | -           | -                           | 46428                     | -        | -        | -29.75     | -66.15     |
| Argentina | South America | -                         | -                 | -           | G6007     | Synthetic | -           | -                           | 106668                    | -        | -        | -29.75     | -60.85     |
| Argentina | South America | -                         | -                 | -           | G6008     | Synthetic | -           | -                           | 66279                     | -        | -        | -29.75     | -60.75     |
| Argentina | South America | Brazo Principal Isla Pati | Parana            | Parana      | G6010     | BDHI      | 13807       | -                           | 2118330                   | -        | -        | -29.55     | -59.55     |
| Argentina | South America | Paso Lucero               | Corriente         | Parana      | G6011     | BDHI      | 3803        | -                           | 12871                     | -        | -        | -28.85     | -58.35     |
| Argentina | South America | -                         | -                 | -           | G6014     | Synthetic | -           | -                           | 11436                     | -        | -        | -30.05     | -65.25     |
| Argentina | South America | -                         | -                 | -           | G6017     | Synthetic | -           | -                           | 11453                     | -        | -        | -30.15     | -57.65     |
| Argentina | South America | -                         | -                 | -           | G6019     | Synthetic | -           | -                           | 38693                     | -        | -        | -30.25     | -65.35     |
| Argentina | South America | -                         | -                 | -           | G6025     | Synthetic | -           | -                           | 71284                     | -        | -        | -30.55     | -62.55     |

| Country   | Continent     | Station Name        | River Name          | River Basin        | GloFAS ID | Provider  | Provider ID | Catchment Area Provided km² | Catchment Area GloFAS km² | LAT Prov | LON Prov | LAT GloFAS | LON GloFAS |
|-----------|---------------|---------------------|---------------------|--------------------|-----------|-----------|-------------|-----------------------------|---------------------------|----------|----------|------------|------------|
| Argentina | South America | -                   | -                   | -                  | G6036     | Synthetic | -           | -                           | 196487                    | -        | -        | -31.55     | -60.75     |
| Argentina | South America | -                   | -                   | -                  | G6038     | Synthetic | -           | -                           | 14414                     | -        | -        | -31.65     | -60.65     |
| Argentina | South America | -                   | -                   | -                  | G6045     | Synthetic | -           | -                           | 30452                     | -        | -        | -32.55     | -60.85     |
| Argentina | South America | -                   | -                   | -                  | G6047     | Synthetic | -           | -                           | 11869                     | -        | -        | -32.95     | -61.75     |
| Argentina | South America | Timbues             | Parana              | Parana             | G6050     | BDHI      | 13316       | -                           | 2430030                   | -        | -        | -32.75     | -60.75     |
| Argentina | South America | -                   | -                   | -                  | G6051     | Synthetic | -           | -                           | 20215                     | -        | -        | -33.25     | -59.55     |
| Argentina | South America | -                   | -                   | -                  | G6052     | Synthetic | -           | -                           | 126199                    | -        | -        | -33.55     | -67.05     |
| Argentina | South America | El Sosneado         | Atuel               | Colorado           | G6053     | BDHI      | 11428       | -                           | 2545                      | -        | -        | -35.15     | -69.55     |
| Argentina | South America | -                   | -                   | -                  | G6054     | Synthetic | -           | -                           | 2471930                   | -        | -        | -33.75     | -59.15     |
| Argentina | South America | -                   | -                   | -                  | G6055     | Synthetic | -           | -                           | 17657                     | -        | -        | -33.85     | -59.25     |
| Argentina | South America | Dique Ballester     | Neuquen             | Patagonia          | G6059     | BDHI      | 12096       | -                           | 3498                      | -        | -        | -38.75     | -68.25     |
| Argentina | South America | -                   | -                   | -                  | G6060     | Synthetic | -           | -                           | 14993                     | -        | -        | -35.45     | -59.05     |
| Argentina | South America | -                   | -                   | -                  | G6062     | Synthetic | -           | -                           | 24511                     | -        | -        | -35.55     | -59.15     |
| Argentina | South America | -                   | -                   | -                  | G6063     | Synthetic | -           | -                           | 39593                     | -        | -        | -35.55     | -59.05     |
| Argentina | South America | -                   | -                   | -                  | G6065     | Synthetic | -           | -                           | 20938                     | -        | -        | -35.65     | -59.05     |
| Argentina | South America | -                   | -                   | -                  | G6066     | Synthetic | -           | -                           | 67136                     | -        | -        | -35.95     | -58.05     |
| Argentina | South America | -                   | -                   | -                  | G6068     | Synthetic | -           | -                           | 29560                     | -        | -        | -43.75     | -67.25     |
| Argentina | South America | Confluencia         | Manso               | Vertiente Pacifica | G6069     | BDHI      | 11814       | -                           | 2459                      | -        | -        | -41.55     | -71.75     |
| Argentina | South America | Paso Cordova        | Negro               | Patagonia          | G6071     | BDHI      | 11808       | -                           | 56226                     | -        | -        | -39.05     | -67.75     |
| Argentina | South America | Bajada Del Agrio    | Agrio               | Patagonia          | G6072     | BDHI      | 12010       | -                           | 6225                      | -        | -        | -38.35     | -70.05     |
| Argentina | South America | Buta Ranquil        | Colorado            | Colorado           | G6073     | BDHI      | 12002       | -                           | 13255                     | -        | -        | -37.05     | -69.75     |
| Argentina | South America | Pichi Mahuida       | Colorado            | Colorado           | G6074     | BDHI      | 11801       | -                           | 264657                    | -        | -        | -38.85     | -64.85     |
| Argentina | South America | Ameghino            | Chubut              | Patagonia          | G6079     | BDHI      | 12281       | -                           | 71593                     | -        | -        | -43.65     | -66.35     |
| Bolivia   | South America | Morada Nova Jusante | Abuna               | Amazonas           | G1262     | GRDC      | 3627060     | 31000                       | 30954                     | -        | -        | -9.85      | -65.55     |
| Bolivia   | South America | Pedras Negras       | Guapore             | Amazonas           | G1308     | GRDC      | 3617810     | 116731                      | 108229                    | -12.83   | -62.93   | -12.85     | -63.05     |
| Bolivia   | South America | Pimenteiras         | Guapore             | Amazonas           | G1316     | GRDC      | 3627812     | 54200                       | 54297                     | -        | -61.05   | -13.55     | -61.05     |
| Bolivia   | South America | Fecho Dos Morros    | Paraguai _ Paraguay | Parana             | G1408     | GRDC      | 3667050     | 470000                      | 510143                    | -        | -        | -20.15     | -58.15     |
| Bolivia   | South America | -                   | Guapore             | Amazonas           | G1880     | DFO       | 1139        | -                           | 346086                    | -        | -        | -12.15     | -64.75     |
| Bolivia   | South America | -                   | Itonamas            | Amazonas           | G1881     | DFO       | 1144        | -                           | 101334                    | -        | -        | -13.25     | -64.05     |
| Bolivia   | South America | Camiaco             | Mamore              | Amazonas           | G1882     | CEMADE    | 1523300     | 136000                      | 126713                    | -        | -        | -15.35     | -64.95     |
| Bolivia   | South America | Pena Amarilla       | Beni                | Amazonas           | G1883     | CEMADE    | 1529000     | 107000                      | 106202                    | -        | -        | -11.65     | -66.75     |
| Bolivia   | South America | -                   | Yacuma              | Amazonas           | G1884     | DFO       | 1150        | -                           | 9183                      | -        | -        | -13.95     | -66.15     |
| Bolivia   | South America | -                   | Ichoa               | Amazonas           | G1885     | DFO       | 1151        | -                           | 5010                      | -        | -        | -15.75     | -65.25     |
| Bolivia   | South America | -                   | Yata                | Amazonas           | G1886     | DFO       | 1154        | -                           | 4269                      | -        | -        | -12.95     | -66.15     |
| Bolivia   | South America | Puerto Varador      | Mamore              | Amazonas           | G1975     | CEMADE    | 1523500     | 153000                      | 148780                    | -        | -        | -15.05     | -65.05     |
| Bolivia   | South America | -                   | Ichilo              | Amazonas           | G1976     | DFO       | 2619        | -                           | 16059                     | -        | -        | -16.15     | -64.65     |
| Bolivia   | South America | -                   | Isiboro             | Amazonas           | G1977     | DFO       | 2621        | -                           | 4884                      | -        | -        | -15.85     | -65.25     |
| Bolivia   | South America | -                   | Pilcomayo           | Parana             | G1996     | DFO       | 100128      | -                           | 77806                     | -        | -        | -21.25     | -63.55     |
| Bolivia   | South America | -                   | Mauri               | Lake Titicaca      | G1997     | DFO       | 100117      | -                           | 76051                     | -        | -        | -17.35     | -68.65     |

| Country | Continent     | Station Name       | River Name    | River Basin   | GloFAS ID | Provider  | Provider ID | Catchment Area Provided km² | Catchment Area GloFAS km² | LAT Prov | LON Prov | LAT GloFAS | LON GloFAS |
|---------|---------------|--------------------|---------------|---------------|-----------|-----------|-------------|-----------------------------|---------------------------|----------|----------|------------|------------|
| Bolivia | South America | -                  | Desaguadero   | Lake Titicaca | G1998     | DFO       | 100127      | -                           | 78695                     | -        | -        | -17.55     | -68.45     |
| Bolivia | South America | Puerto Siles       | Mamore        | Amazonas      | G1999     | CEMADE    | 1524200     | 227000                      | 217631                    | -        | -        | -13.05     | -65.05     |
| Bolivia | South America | Rurrenabaque       | Beni          | Amazonas      | G2000     | CEMADE    | 1527510     | 70000                       | 68830                     | -        | -        | -14.55     | -67.55     |
| Bolivia | South America | Cachuela Esperanza | Beni          | Amazonas      | G5574     | CEMADE    | 1529550     | 281000                      | 278045                    | -        | -        | -10.55     | -65.55     |
| Bolivia | South America | -                  | -             | -             | G5585     | Synthetic | -           | -                           | 33182                     | -        | -        | -10.85     | -66.15     |
| Bolivia | South America | Miraflores         | Madre de Dios | Amazonas      | G5587     | CEMADE    | 1528980     | 125000                      | 122974                    | -        | -        | -11.15     | -66.65     |
| Bolivia | South America | Riberalta          | Beni          | Amazonas      | G5588     | CEMADE    | 1166000     | 244000                      | 241500                    | -        | -        | -10.95     | -66.05     |
| Bolivia | South America | -                  | -             | -             | G5595     | Synthetic | -           | -                           | 14986                     | -        | -        | -11.15     | -67.65     |
| Bolivia | South America | -                  | -             | -             | G5596     | Synthetic | -           | -                           | 13993                     | -        | -        | -11.15     | -67.55     |
| Bolivia | South America | El Sena            | Madre de Dios | Amazonas      | G5626     | CEMADE    | 1531200     | 120000                      | 119020                    | -        | -        | -11.45     | -67.25     |
| Bolivia | South America | -                  | -             | -             | G5627     | Synthetic | -           | -                           | 123696                    | -        | -        | -12.55     | -64.35     |
| Bolivia | South America | -                  | -             | -             | G5628     | Synthetic | -           | -                           | 75348                     | -        | -        | -12.55     | -64.25     |
| Bolivia | South America | -                  | -             | -             | G5633     | Synthetic | -           | -                           | 82325                     | -        | -        | -12.65     | -66.95     |
| Bolivia | South America | -                  | -             | -             | G5634     | Synthetic | -           | -                           | 18797                     | -        | -        | -12.65     | -64.45     |
| Bolivia | South America | -                  | -             | -             | G5635     | Synthetic | -           | -                           | 104780                    | -        | -        | -12.65     | -64.35     |
| Bolivia | South America | -                  | -             | -             | G5638     | Synthetic | -           | -                           | 48220                     | -        | -        | -13.35     | -63.65     |
| Bolivia | South America | -                  | -             | -             | G5643     | Synthetic | -           | -                           | 57377                     | -        | -        | -13.55     | -61.75     |
| Bolivia | South America | -                  | -             | -             | G5644     | Synthetic | -           | -                           | 27689                     | -        | -        | -13.65     | -61.75     |
| Bolivia | South America | -                  | -             | -             | G5645     | Synthetic | -           | -                           | 21301                     | -        | -        | -13.75     | -65.45     |
| Bolivia | South America | -                  | -             | -             | G5646     | Synthetic | -           | -                           | 176090                    | -        | -        | -13.75     | -65.25     |
| Bolivia | South America | -                  | -             | -             | G5647     | Synthetic | -           | -                           | 14555                     | -        | -        | -13.85     | -65.35     |
| Bolivia | South America | -                  | -             | -             | G5648     | Synthetic | -           | -                           | 16322                     | -        | -        | -13.95     | -62.55     |
| Bolivia | South America | -                  | -             | -             | G5650     | Synthetic | -           | -                           | 15812                     | -        | -        | -14.05     | -62.65     |
| Bolivia | South America | -                  | -             | -             | G5659     | Synthetic | -           | -                           | 54598                     | -        | -        | -14.75     | -67.65     |
| Bolivia | South America | -                  | -             | -             | G5666     | Synthetic | -           | -                           | 20572                     | -        | -        | -15.25     | -67.65     |
| Bolivia | South America | -                  | -             | -             | G5667     | Synthetic | -           | -                           | 30623                     | -        | -        | -15.25     | -67.55     |
| Bolivia | South America | -                  | -             | -             | G5680     | Synthetic | -           | -                           | 12878                     | -        | -        | -15.75     | -67.15     |
| Bolivia | South America | -                  | -             | -             | G5681     | Synthetic | -           | -                           | 15641                     | -        | -        | -15.75     | -67.05     |
| Bolivia | South America | -                  | -             | -             | G5682     | Synthetic | -           | -                           | 104249                    | -        | -        | -15.85     | -64.65     |
| Bolivia | South America | -                  | -             | -             | G5718     | Synthetic | -           | -                           | 30038                     | -        | -        | -17.15     | -58.45     |
| Bolivia | South America | -                  | -             | -             | G5724     | Synthetic | -           | -                           | 14765                     | -        | -        | -17.35     | -61.15     |
| Bolivia | South America | -                  | -             | -             | G5728     | Synthetic | -           | -                           | 42652                     | -        | -        | -17.55     | -61.15     |
| Bolivia | South America | -                  | -             | -             | G5729     | Synthetic | -           | -                           | 52008                     | -        | -        | -17.55     | -57.85     |
| Bolivia | South America | -                  | -             | -             | G5736     | Synthetic | -           | -                           | 24478                     | -        | -        | -17.85     | -61.35     |
| Bolivia | South America | -                  | -             | -             | G5737     | Synthetic | -           | -                           | 16910                     | -        | -        | -17.85     | -61.15     |
| Bolivia | South America | -                  | -             | -             | G5778     | Synthetic | -           | -                           | 91584                     | -        | -        | -18.25     | -67.05     |
| Bolivia | South America | -                  | -             | -             | G5786     | Synthetic | -           | -                           | 109936                    | -        | -        | -19.25     | -67.05     |
| Bolivia | South America | -                  | -             | -             | G5790     | Synthetic | -           | -                           | 21372                     | -        | -        | -19.65     | -58.25     |
| Bolivia | South America | -                  | -             | -             | G5794     | Synthetic | -           | -                           | 33336                     | -        | -        | -19.75     | -58.35     |

| Country | Continent     | Station Name            | River Name          | River Basin | GloFAS ID | Provider  | Provider ID | Catchment Area Provided km² | Catchment Area GloFAS km² | LAT Prov | LON Prov | LAT GloFAS | LON GloFAS |
|---------|---------------|-------------------------|---------------------|-------------|-----------|-----------|-------------|-----------------------------|---------------------------|----------|----------|------------|------------|
| Bolivia | South America | -                       | -                   | -           | G5823     | Synthetic | -           | -                           | 23060                     | -        | -        | -20.85     | -64.15     |
| Bolivia | South America | -                       | -                   | -           | G5838     | Synthetic | -           | -                           | 20922                     | -        | -        | -21.05     | -65.25     |
| Bolivia | South America | -                       | -                   | -           | G5839     | Synthetic | -           | -                           | 46379                     | -        | -        | -21.05     | -64.15     |
| Brazil  | South America | Estirao Do Cricou       | Oiapoque            | Oyapock     | G1116     | GRDC      | 3514800     | 25120                       | 25473                     | 3.7217   | -        | 3.85       | -51.85     |
| Brazil  | South America | Uaicas                  | Uraricoera          | Amazonas    | G1118     | GRDC      | 3618722     | 16065                       | 15329                     | 3.5497   | -        | 3.45       | -63.15     |
| Brazil  | South America | Fazenda Cajupiranga     | Uraricoera          | Amazonas    | G1120     | GRDC      | 3618721     | 37430                       | 35727                     | 3.4381   | -        | 3.45       | -61.15     |
| Brazil  | South America | Fazenda Passarao        | Uraricoera          | Amazonas    | G1121     | GRDC      | 3618720     | 50985                       | 49198                     | 3.2078   | -        | 3.25       | -60.55     |
| Brazil  | South America | Fe E Esperanca          | Mucajai             | Amazonas    | G1124     | GRDC      | 3618730     | 13658                       | 13233                     | 2.8708   | -        | 2.85       | -61.45     |
| Brazil  | South America | Solano                  | Brazo Casiquiare    | Amazonas    | G1127     | GRDC      | 3218100     | 80960                       | 78913                     | 1.95     | -66.95   | -0.95      | -67.15     |
| Brazil  | South America | San Carlos De Rio Negro | Negro               | Amazonas    | G1128     | GRDC      | 3218050     | 103760                      | 88685                     | 1.93     | -67.12   | -0.55      | -67.25     |
| Brazil  | South America | Caracarai               | Branco              | Amazonas    | G1129     | GRDC      | 3618500     | 124980                      | 126092                    | 1.8214   | -        | 1.85       | -61.05     |
| Brazil  | South America | Missao Icana            | Icana               | Amazonas    | G1131     | GRDC      | 3618110     | 22282                       | 23131                     | 1.0744   | -        | 1.15       | -67.65     |
| Brazil  | South America | Serra Do Navio          | Amapari             | Araguari    | G1132     | GRDC      | 3631060     | 10570                       | 10514                     | -        | -52.01   | -0.95      | -52.15     |
| Brazil  | South America | Posto Ajuricaba         | Demeni              | Amazonas    | G1133     | GRDC      | 3618150     | 14756                       | 17936                     | -        | -        | -0.95      | -62.65     |
| Brazil  | South America | Porto Platon            | Araguari            | Araguari    | G1134     | GRDC      | 3631050     | 29820                       | 30676                     | -        | -        | -0.75      | -51.55     |
| Brazil  | South America | Uaracu                  | Vaupes _ Uaupes     | Amazonas    | G1136     | GRDC      | 3618950     | 40506                       | 40942                     | -        | -        | -0.45      | -69.15     |
| Brazil  | South America | Sao Felipe              | Negro               | Amazonas    | G1137     | GRDC      | 3618053     | 110862                      | 124061                    | -        | -        | -0.45      | -67.35     |
| Brazil  | South America | Taraqua                 | Vaupes _ Uaupes     | Amazonas    | G1138     | GRDC      | 3618951     | 44732                       | 44404                     | -        | -        | -0.15      | -68.55     |
| Brazil  | South America | Curicuriari             | Negro               | Amazonas    | G1139     | GRDC      | 3618052     | 194462                      | 194185                    | -        | -        | -0.15      | -66.85     |
| Brazil  | South America | Jusante Da Cachoeira Do | Curicuriari         | Amazonas    | G1140     | GRDC      | 3618130     | 10228                       | 13597                     | -        | -        | -0.25      | -67.05     |
| Brazil  | South America | Fazenda Paquira         | Paru De Este        | Amazonas    | G1141     | GRDC      | 3631210     | 30945                       | 30792                     | -        | -53.7    | -0.65      | -53.55     |
| Brazil  | South America | Serrinha                | Negro               | Amazonas    | G1142     | GRDC      | 3618051     | 279945                      | 282924                    | -        | -        | -0.45      | -64.95     |
| Brazil  | South America | Sao Francisco           | Jari                | Amazonas    | G1143     | GRDC      | 3631100     | 51343                       | 53181                     | -        | -        | -0.55      | -52.55     |
| Brazil  | South America | Aldeia Wai Wai          | Mapuera _ Urucurina | Amazonas    | G1144     | GRDC      | 3628501     | 21400                       | 21764                     | -        | -        | -0.65      | -58.05     |
| Brazil  | South America | Garganta                | Trombetas           | Amazonas    | G1145     | GRDC      | 3628202     | 37910                       | 37597                     | -        | -        | -0.75      | -56.85     |
| Brazil  | South America | Caramujo                | Trombetas           | Amazonas    | G1146     | GRDC      | 3628201     | 50650                       | 38586                     | -1.065   | -        | -0.95      | -57.05     |
| Brazil  | South America | Cach Da Porteira Conj 1 | Trombetas           | Amazonas    | G1147     | GRDC      | 3628200     | 76782                       | 77779                     | -        | -        | -1.05      | -57.05     |
| Brazil  | South America | Estirao Da Angelica     | Mapuera _ Urucurina | Amazonas    | G1148     | GRDC      | 3628500     | 26040                       | 26212                     | -        | -        | -1.15      | -57.15     |
| Brazil  | South America | Vista Alegre Conj 1     | Cumina _ Paru De    | Amazonas    | G1149     | GRDC      | 3628100     | 34751                       | 35369                     | -        | -56.04   | -0.95      | -56.15     |
| Brazil  | South America | Mineracao Caima         | Nhamunda            | Amazonas    | G1151     | GRDC      | 3628300     | 10615                       | 10008                     | -        | -        | -1.45      | -57.85     |
| Brazil  | South America | Boca Do Inferno         | Curua               | Amazonas    | G1152     | GRDC      | 3629100     | 20803                       | 19776                     | -        | -        | -1.45      | -54.95     |
| Brazil  | South America | Arapari                 | Maicuru             | Amazonas    | G1153     | GRDC      | 3630300     | 17072                       | 13097                     | -        | -        | -1.85      | -54.45     |
| Brazil  | South America | Alto Bonito             | Gurupi              | Gurupi      | G1154     | GRDC      | 3650202     | 31850                       | 31888                     | -        | -        | -1.95      | -46.25     |
| Brazil  | South America | Acanaui                 | Caqueta _ Japura    | Amazonas    | G1155     | GRDC      | 3621200     | 242259                      | 250770                    | -        | -66.6    | -1.85      | -66.65     |
| Brazil  | South America | Obidos                  | Amazon _ Amazonas   | Amazonas    | G1156     | GRDC      | 3629001     | 4680000                     | 4664200                   | -        | -        | -1.95      | -55.55     |
| Brazil  | South America | Balbina P 8 Uhe Balbina | Uatuma              | Amazonas    | G1157     | GRDC      | 3628401     | 19126                       | 19022                     | -        | -        | -1.95      | -59.45     |
| Brazil  | South America | Obidos Porto            | Amazonas            | Amazonas    | G1158     | GRDC      | 3629000     | 4680000                     | 4664200                   | -        | -        | -1.95      | -55.55     |
| Brazil  | South America | Cachoeira Morena        | Uatuma              | Amazonas    | G1159     | GRDC      | 3628400     | 20394                       | 19762                     | -        | -        | -2.15      | -59.35     |
| Brazil  | South America | Badajos                 | Capim               | Capim       | G1160     | GRDC      | 3650150     | 38178                       | 32852                     | -        | -        | -2.55      | -47.75     |



| Country | Continent     | Station Name          | River Name        | River Basin | GloFAS ID | Provider | Provider ID | Catchment Area Provided km² | Catchment Area GloFAS km² | LAT Prov | LON Prov | LAT GloFAS | LON GloFAS |
|---------|---------------|-----------------------|-------------------|-------------|-----------|----------|-------------|-----------------------------|---------------------------|----------|----------|------------|------------|
| Brazil  | South America | Jatuarana             | Amazon _ Amazonas | Amazonas    | G1161     | GRDC     | 3618000     | 2854286                     | 2923340                   | -        | -        | -3.05      | -59.65     |
| Brazil  | South America | Santo Antonio Do Ica  | Amazon _ Amazonas | Amazonas    | G1162     | GRDC     | 3620000     | 1134540                     | 1137140                   | -        | -        | -3.15      | -67.95     |
| Brazil  | South America | Careiro               | Parana Do Careiro | Amazonas    | G1163     | GRDC     | 3618001     | 2853079                     | 2922240                   | -        | -        | -3.15      | -59.85     |
| Brazil  | South America | Altamira              | Xingu             | Amazonas    | G1164     | GRDC     | 3630050     | 446203                      | 447109                    | -        | -        | -3.35      | -52.15     |
| Brazil  | South America | Manacapuru            | Amazon            | Amazonas    | G1165     | GRDC     | 3621000     | 2147736                     | 2202820                   | -        | -        | -3.35      | -60.65     |
| Brazil  | South America | Fazenda Rural Zebu    | Gurupi            | Gurupi      | G1166     | GRDC     | 3650205     | 14240                       | 13893                     | -        | -        | -3.45      | -46.95     |
| Brazil  | South America | Sao Paulo De Olivenca | Amazon _ Amazonas | Amazonas    | G1167     | GRDC     | 3623100     | 990781                      | 1011620                   | -        | -        | -3.45      | -68.75     |
| Brazil  | South America | Luzilandia            | Parnaiba          | Parnaiba    | G1168     | GRDC     | 3650481     | 322823                      | 298969                    | -        | -42.37   | -3.45      | -42.25     |
| Brazil  | South America | Nina Rodrigues        | Munim             | Atlantico   | G1169     | GRDC     | 3650385     | 12450                       | 13291                     | -        | -        | -3.45      | -43.95     |
| Brazil  | South America | Cantanhede            | Itapecuru         | Itapecuru   | G1170     | GRDC     | 3650359     | 49500                       | 50244                     | -        | -        | -3.65      | -44.25     |
| Brazil  | South America | Pindare Mirim         | Pindare           | Mearim      | G1171     | GRDC     | 3650285     | 34030                       | 36249                     | -        | -        | -3.65      | -45.45     |
| Brazil  | South America | Tinguis               | Longa             | Parnaiba    | G1172     | GRDC     | 3650477     | 24100                       | 22619                     | -        | -        | -3.65      | -41.95     |
| Brazil  | South America | Fazenda Cipaubá       | Bacaja            | Amazonas    | G1173     | GRDC     | 3630010     | 24575                       | 24545                     | -        | -        | -3.65      | -51.55     |
| Brazil  | South America | Tucuruí               | Tocantins         | Tocantins   | G1174     | GRDC     | 3649950     | 742300                      | 753275                    | -        | -        | -3.75      | -49.65     |
| Brazil  | South America | Esperantina           | Longa             | Parnaiba    | G1175     | GRDC     | 3650475     | 11000                       | 11179                     | -        | -        | -3.95      | -42.25     |
| Brazil  | South America | Itapeua               | Amazon _ Amazonas | Amazonas    | G1176     | GRDC     | 3625000     | 1769000                     | 1777090                   | -        | -        | -4.05      | -63.05     |
| Brazil  | South America | Bacabal               | Mearim            | Mearim      | G1177     | GRDC     | 3650335     | 27650                       | 25608                     | -        | -        | -4.25      | -44.75     |
| Brazil  | South America | Barreira Alta         | Jutai             | Amazonas    | G1178     | GRDC     | 3624200     | 35880                       | 35782                     | -        | -        | -4.25      | -67.95     |
| Brazil  | South America | Estirao Da Santa Cruz | Tefe              | Amazonas    | G1179     | GRDC     | 3624400     | 13708                       | 13871                     | -        | -        | -4.35      | -65.25     |
| Brazil  | South America | Barreira Branca       | Bia               | Amazonas    | G1181     | GRDC     | 3624250     | 11047                       | 11168                     | -        | -        | -4.35      | -67.35     |
| Brazil  | South America | Pedra Do O            | Iriri             | Amazonas    | G1183     | GRDC     | 3630120     | 123827                      | 123309                    | -        | -        | -4.45      | -53.95     |
| Brazil  | South America | Santa Maria           | Curuca            | Amazonas    | G1184     | GRDC     | 3622450     | 24351                       | 23994                     | -        | -        | -4.65      | -71.45     |
| Brazil  | South America | Aruma Jusante         | Purus             | Amazonas    | G1185     | GRDC     | 3625310     | 359853                      | 364428                    | -        | -        | -4.75      | -62.25     |
| Brazil  | South America | Ladario               | Itui              | Amazonas    | G1186     | GRDC     | 3622800     | 18236                       | 19836                     | -        | -70.3    | -4.75      | -70.35     |
| Brazil  | South America | Seringal Do Itui      | Itui              | Amazonas    | G1187     | GRDC     | 3622801     | 19103                       | 18977                     | -        | -70.3    | -4.95      | -70.45     |
| Brazil  | South America | Gaviao                | Jurua             | Amazonas    | G1188     | GRDC     | 3624120     | 162000                      | 162347                    | -        | -        | -4.95      | -66.85     |
| Brazil  | South America | Caxias                | Itapecuru         | Itapecuru   | G1189     | GRDC     | 3650355     | 32700                       | 32921                     | -        | -        | -4.85      | -43.35     |
| Brazil  | South America | Fazenda Vista Alegre  | Madeira           | Amazonas    | G1190     | GRDC     | 3627010     | 1310000                     | 1303140                   | -        | -        | -3.55      | -58.95     |
| Brazil  | South America | Morada Nova Ii        | Banabuiu          | Jaguaribe   | G1191     | GRDC     | 3650634     | 17900                       | 17662                     | -        | -        | -5.15      | -38.35     |
| Brazil  | South America | Itupiranga            | Tocantins         | Tocantins   | G1192     | GRDC     | 3649900     | 731270                      | 731906                    | -        | -        | -5.15      | -49.35     |
| Brazil  | South America | Jatoba                | Tapajos           | Amazonas    | G1194     | GRDC     | 3629152     | 387000                      | 384803                    | -        | -        | -5.15      | -56.85     |
| Brazil  | South America | Fazenda Cantinho Ii   | Poti              | Parnaiba    | G1195     | GRDC     | 3650470     | 50000                       | 49871                     | -        | -        | -5.45      | -42.55     |
| Brazil  | South America | Fazenda Boa Esperanca | Poti              | Parnaiba    | G1196     | GRDC     | 3650471     | 19300                       | 19510                     | -        | -        | -5.25      | -41.75     |
| Brazil  | South America | Peixe Gordo           | Jaguaribe         | Jaguaribe   | G1197     | GRDC     | 3650649     | 48200                       | 48278                     | -        | -        | -5.25      | -38.15     |
| Brazil  | South America | Maraba                | Tocantins         | Tocantins   | G1198     | GRDC     | 3649901     | 690920                      | 689694                    | -        | -        | -5.35      | -49.05     |
| Brazil  | South America | Colocacao Caxias      | Jutai             | Amazonas    | G1199     | GRDC     | 3624201     | 10257                       | 10035                     | -        | -        | -5.55      | -69.15     |
| Brazil  | South America | Fazenda Alegria       | Itacaiunas        | Tocantins   | G1200     | GRDC     | 3649960     | 37600                       | 37435                     | -        | -        | -5.45      | -49.25     |
| Brazil  | South America | Araguatins            | Araguaia          | Tocantins   | G1201     | GRDC     | 3649419     | 376660                      | 376453                    | -        | -        | -5.65      | -48.15     |
| Brazil  | South America | Cajueiro              | Curua             | Amazonas    | G1202     | GRDC     | 3630210     | 35213                       | 35454                     | -5.65    | -        | -5.85      | -54.55     |

| Country | Continent     | Station Name           | River Name        | River Basin      | GloFAS ID | Provider | Provider ID | Catchment Area Provided km² | Catchment Area GloFAS km² | LAT Prov | LON Prov | LAT GloFAS | LON GloFAS |
|---------|---------------|------------------------|-------------------|------------------|-----------|----------|-------------|-----------------------------|---------------------------|----------|----------|------------|------------|
| Brazil  | South America | Laranjeiras            | Iriri             | Amazonas         | G1203     | GRDC     | 3630150     | 60058                       | 58666                     | -        | -        | -5.75      | -54.25     |
| Brazil  | South America | Descarreto             | Tocantins         | Tocantins        | G1204     | GRDC     | 3649902     | 298559                      | 295830                    | -        | -        | -5.75      | -47.45     |
| Brazil  | South America | Manicore               | Madeira           | Amazonas         | G1205     | GRDC     | 3627030     | 1150000                     | 1132190                   | -        | -        | -5.85      | -61.35     |
| Brazil  | South America | Fortaleza              | Tapajos           | Amazonas         | G1206     | GRDC     | 3629150     | 363000                      | 362668                    | -        | -        | -5.85      | -57.45     |
| Brazil  | South America | Tocantinopolis         | Tocantins         | Tocantins        | G1207     | GRDC     | 3649903     | 290570                      | 288243                    | -        | -        | -6.15      | -47.45     |
| Brazil  | South America | Bacaba                 | Tapaua            | Amazonas         | G1208     | GRDC     | 3625220     | 38270                       | 38229                     | -        | -        | -6.35      | -64.95     |
| Brazil  | South America | Nova Esperanca         | Marmelos          | Amazonas         | G1209     | GRDC     | 3627100     | 26200                       | 26418                     | -        | -        | -6.55      | -61.75     |
| Brazil  | South America | Jardim De Piranhas     | Piranhas Acu      | Atlantico_Trecho | G1210     | GRDC     | 3650750     | 21350                       | 21476                     | -        | -        | -6.45      | -37.35     |
| Brazil  | South America | Ico                    | Salgado           | Jaguaribe        | G1211     | GRDC     | 3650745     | 12000                       | 12932                     | -        | -        | -6.45      | -38.85     |
| Brazil  | South America | Xambioa                | Araguaia          | Tocantins        | G1212     | GRDC     | 3649418     | 364500                      | 364099                    | -        | -        | -6.35      | -48.55     |
| Brazil  | South America | Santos Dumont          | Jurua             | Amazonas         | G1213     | GRDC     | 3624121     | 142234                      | 142646                    | -        | -        | -6.55      | -68.35     |
| Brazil  | South America | Canutama               | Purus             | Amazonas         | G1214     | GRDC     | 3625320     | 230012                      | 234984                    | -        | -        | -6.55      | -64.45     |
| Brazil  | South America | Eirunepe Montante      | Jurua             | Amazonas         | G1215     | GRDC     | 3624122     | 77136                       | 76103                     | -        | -        | -6.75      | -69.95     |
| Brazil  | South America | Boa Sorte              | Xingu             | Amazonas         | G1217     | GRDC     | 3630051     | 206863                      | 207161                    | -        | -        | -6.95      | -52.25     |
| Brazil  | South America | Boa Esperanca          | Fresco            | Amazonas         | G1218     | GRDC     | 3630200     | 43030                       | 42706                     | -        | -        | -6.75      | -51.75     |
| Brazil  | South America | Santarem               | Sucunduri         | Amazonas         | G1219     | GRDC     | 3627700     | 14597                       | 13764                     | -6.75    | -58.93   | -6.65      | -59.05     |
| Brazil  | South America | Santarem Sucunduri     | Sucunduri         | Amazonas         | G1220     | GRDC     | 3627701     | 12700                       | 12421                     | -        | -        | -6.85      | -59.05     |
| Brazil  | South America | Novo Progresso         | Jamanxim          | Amazonas         | G1221     | GRDC     | 3629210     | 12300                       | 12286                     | -        | -        | -7.15      | -55.45     |
| Brazil  | South America | Ipixuna                | Jurua             | Amazonas         | G1222     | GRDC     | 3624123     | 55806                       | 55259                     | -        | -        | -7.05      | -71.75     |
| Brazil  | South America | Ponte Da Batalha       | Paraiba           | Paraiba          | G1223     | GRDC     | 3650885     | 19244                       | 19372                     | -7.13    | -        | -7.15      | -34.95     |
| Brazil  | South America | Santa Cruz Do Piaui Ii | Itaim             | Parnaiba         | G1224     | GRDC     | 3650460     | 17400                       | 17311                     | -        | -        | -7.25      | -41.75     |
| Brazil  | South America | Prainha Velha          | Aripuana          | Amazonas         | G1225     | GRDC     | 3627650     | 131000                      | 130682                    | -        | -60.65   | -7.25      | -60.65     |
| Brazil  | South America | Sao Francisco Do Piaui | Piaui             | Parnaiba         | G1226     | GRDC     | 3650455     | 35000                       | 34227                     | -        | -        | -7.05      | -42.65     |
| Brazil  | South America | Labrea                 | Purus             | Amazonas         | G1227     | GRDC     | 3625340     | 226351                      | 225241                    | -        | -        | -7.25      | -64.75     |
| Brazil  | South America | Carolina               | Tocantins         | Tocantins        | G1228     | GRDC     | 3649904     | 276520                      | 272983                    | -        | -        | -7.35      | -47.45     |
| Brazil  | South America | Barra Do Sao Manuel    | Tapajos           | Amazonas         | G1229     | GRDC     | 3629180     | 333000                      | 328733                    | -        | -        | -7.35      | -58.15     |
| Brazil  | South America | Envira                 | Tarauaca          | Amazonas         | G1230     | GRDC     | 3624300     | 48317                       | 50312                     | -        | -        | -7.45      | -70.05     |
| Brazil  | South America | Humaita                | Madeira           | Amazonas         | G1231     | GRDC     | 3627035     | 1090000                     | 1073780                   | -        | -        | -7.45      | -63.05     |
| Brazil  | South America | Fazenda Borangaba      | Pauini            | Amazonas         | G1232     | GRDC     | 3625200     | 23365                       | 23372                     | -7.55    | -67.55   | -7.55      | -67.55     |
| Brazil  | South America | Fazenda Boa Lembranca  | Roosevelt         | Amazonas         | G1233     | GRDC     | 3627551     | 59400                       | 59248                     | -        | -        | -7.65      | -60.75     |
| Brazil  | South America | Tres Marias            | Teles Pires _ Sao | Amazonas         | G1234     | GRDC     | 3629790     | 138000                      | 136898                    | -        | -        | -7.65      | -57.95     |
| Brazil  | South America | Cruzeiro Do Sul        | Jurua             | Amazonas         | G1235     | GRDC     | 3624160     | 38537                       | 37841                     | -        | -        | -7.65      | -72.65     |
| Brazil  | South America | Boca Do Guariba        | Aripuana          | Amazonas         | G1236     | GRDC     | 3627651     | 70100                       | 69972                     | -        | -        | -7.75      | -60.55     |
| Brazil  | South America | Seringal Fortaleza     | Purus             | Amazonas         | G1237     | GRDC     | 3625350     | 153016                      | 153725                    | -        | -        | -7.75      | -66.95     |
| Brazil  | South America | Foz Do Juruena         | Juruena           | Amazonas         | G1238     | GRDC     | 3629390     | 182000                      | 181498                    | -        | -        | -7.55      | -58.25     |
| Brazil  | South America | Leontino               | Guariba           | Amazonas         | G1239     | GRDC     | 3627660     | 16300                       | 15743                     | -        | -        | -7.85      | -60.55     |
| Brazil  | South America | Tarauaca Jusante       | Tarauaca          | Amazonas         | G1240     | GRDC     | 3624301     | 16050                       | 16363                     | -        | -        | -8.15      | -70.75     |
| Brazil  | South America | Feijo                  | Envira            | Amazonas         | G1241     | GRDC     | 3624310     | 16400                       | 16445                     | -        | -        | -8.25      | -70.45     |
| Brazil  | South America | Conceicao Do Araguaia  | Araguaia          | Tocantins        | G1242     | GRDC     | 3649416     | 320290                      | 319643                    | -        | -        | -8.35      | -49.25     |

| Country | Continent     | Station Name             | River Name          | River Basin   | GloFAS ID | Provider | Provider ID | Catchment Area Provided km² | Catchment Area GloFAS km² | LAT Prov | LON Prov | LAT GloFAS | LON GloFAS |
|---------|---------------|--------------------------|---------------------|---------------|-----------|----------|-------------|-----------------------------|---------------------------|----------|----------|------------|------------|
| Brazil  | South America | Fazenda Paracati li      | Parnaiba            | Parnaiba      | G1243     | GRDC     | 3650488     | 26000                       | 26261                     | -        | -        | -8.25      | -45.65     |
| Brazil  | South America | Bom Destino              | Aripuana            | Amazonas      | G1244     | GRDC     | 3627610     | 40100                       | 40133                     | -        | -        | -8.45      | -59.55     |
| Brazil  | South America | Tupiratins               | Tocantins           | Tocantins     | G1245     | GRDC     | 3649905     | 243841                      | 242578                    | -        | -        | -8.35      | -48.15     |
| Brazil  | South America | Valparaíso Montante      | Purus               | Amazonas      | G1246     | GRDC     | 3625360     | 103285                      | 105320                    | -        | -        | -8.65      | -67.35     |
| Brazil  | South America | Porto Velho              | Madeira             | Amazonas      | G1247     | GRDC     | 3627040     | 976000                      | 962720                    | -        | -        | -8.75      | -63.95     |
| Brazil  | South America | Cachoeira Do Samuel 17 F | Jamari              | Amazonas      | G1248     | GRDC     | 3627300     | 14900                       | 14949                     | -        | -        | -8.95      | -63.35     |
| Brazil  | South America | Santa Isabel             | Candeias            | Amazonas      | G1249     | GRDC     | 3627310     | 12600                       | 12565                     | -        | -        | -8.75      | -63.75     |
| Brazil  | South America | Santa Rosa               | Teles Pires _ Sao   | Amazonas      | G1250     | GRDC     | 3629770     | 131000                      | 131432                    | -        | -        | -8.85      | -57.45     |
| Brazil  | South America | Manoel Urbano            | Purus               | Amazonas      | G1251     | GRDC     | 3625380     | 33693                       | 33171                     | -        | -        | -8.75      | -69.15     |
| Brazil  | South America | Tabajara                 | Ji Parana _ Machado | Amazonas      | G1252     | GRDC     | 3627402     | 60300                       | 59651                     | -        | -        | -8.95      | -62.05     |
| Brazil  | South America | Thaumaturgo              | Jurua               | Amazonas      | G1253     | GRDC     | 3624180     | 16581                       | 15956                     | -        | -        | -8.95      | -72.75     |
| Brazil  | South America | Seringal Da Caridade     | Purus               | Amazonas      | G1254     | GRDC     | 3625370     | 63166                       | 63111                     | -        | -        | -9.05      | -68.55     |
| Brazil  | South America | Floriano Peixoto         | Acre                | Amazonas      | G1255     | GRDC     | 3625160     | 33469                       | 34819                     | -        | -        | -9.05      | -67.35     |
| Brazil  | South America | Porto Real               | Do Sono             | Tocantins     | G1256     | GRDC     | 3649320     | 44910                       | 43758                     | -        | -        | -9.35      | -47.95     |
| Brazil  | South America | Seringal Sao Jose        | Iaco _ Yaco         | Amazonas      | G1257     | GRDC     | 3625400     | 10471                       | 10472                     | -        | -        | -9.75      | -68.85     |
| Brazil  | South America | Foz Do Breu              | Jurua               | Amazonas      | G1258     | GRDC     | 3624190     | 10446                       | 7605                      | -        | -        | -9.45      | -72.75     |
| Brazil  | South America | Miracema Do Tocantins    | Tocantins           | Tocantins     | G1259     | GRDC     | 3649906     | 186834                      | 186699                    | -        | -        | -9.55      | -48.35     |
| Brazil  | South America | Jusante Foz Peixoto De   | Teles Pires _ Sao   | Amazonas      | G1260     | GRDC     | 3629771     | 81600                       | 81617                     | -        | -        | -9.65      | -56.15     |
| Brazil  | South America | Abuna                    | Madeira             | Amazonas      | G1261     | GRDC     | 3627041     | 921000                      | 907734                    | -        | -        | -9.75      | -65.35     |
| Brazil  | South America | Concisa                  | Roosevelt           | Amazonas      | G1263     | GRDC     | 3627550     | 24300                       | 24460                     | -        | -        | -9.85      | -60.65     |
| Brazil  | South America | Novo Acordo              | Do Sono             | Tocantins     | G1266     | GRDC     | 3649321     | 18500                       | 18070                     | -        | -        | -9.95      | -47.65     |
| Brazil  | South America | Branco                   | Acre                | Amazonas      | G1267     | GRDC     | 3625150     | 22670                       | 23338                     | -9.975   | -        | -10.05     | -67.85     |
| Brazil  | South America | Jatoba Fazenda Boa Nova  | Do Sono             | Tocantins     | G1268     | GRDC     | 3649322     | 13855                       | 16984                     | -        | -        | -10.05     | -47.45     |
| Brazil  | South America | Indeco                   | Teles Pires _ Sao   | Amazonas      | G1270     | GRDC     | 3629772     | 52200                       | 51340                     | -        | -        | -10.15     | -55.55     |
| Brazil  | South America | Humboldt                 | Aripuana            | Amazonas      | G1272     | GRDC     | 3627600     | 15200                       | 15127                     | -        | -        | -10.25     | -59.45     |
| Brazil  | South America | Estrada Cuiaba Santarem  | Peixoto De Azevedo  | Amazonas      | G1273     | GRDC     | 3629800     | 17278                       | 17115                     | -        | -        | -10.15     | -55.25     |
| Brazil  | South America | Barreira Da Cruz         | Javaes              | Tocantins     | G1274     | GRDC     | 3649460     | 40327                       | 39796                     | -        | -        | -10.55     | -49.95     |
| Brazil  | South America | Guajara Mirim            | Mamore              | Amazonas      | G1275     | GRDC     | 3627110     | 609000                      | 602082                    | -        | -        | -10.75     | -65.35     |
| Brazil  | South America | Ji Parana                | Ji Parana _ Machado | Amazonas      | G1276     | GRDC     | 3627408     | 32800                       | 32278                     | -        | -        | -10.85     | -61.95     |
| Brazil  | South America | Fazenda Belem            | Vaza Barris         | Vaza Barris   | G1278     | GRDC     | 3652050     | 15740                       | 15308                     | -        | -        | -11.05     | -37.25     |
| Brazil  | South America | Queimadas                | Itapicuru           | Itapicuru     | G1280     | GRDC     | 3652030     | 11825                       | 11773                     | -        | -        | -10.95     | -39.65     |
| Brazil  | South America | Fazenda Porto Limpo      | Preto               | Sao Francisco | G1281     | GRDC     | 3651680     | 22100                       | 22695                     | -        | -        | -11.25     | -43.95     |
| Brazil  | South America | Boqueirao                | Grande              | Sao Francisco | G1282     | GRDC     | 3651678     | 46300                       | 40799                     | -        | -        | -11.45     | -43.95     |
| Brazil  | South America | Fontanilhas              | Juruena             | Amazonas      | G1283     | GRDC     | 3629380     | 55900                       | 54834                     | -        | -        | -11.45     | -58.35     |
| Brazil  | South America | Fazenda Lobeira          | Manuel Alves        | Tocantins     | G1284     | GRDC     | 3649240     | 14475                       | 14121                     | -        | -        | -11.55     | -48.25     |
| Brazil  | South America | Porto Dos Gauchos        | Arinos              | Amazonas      | G1285     | GRDC     | 3629910     | 37100                       | 37394                     | -        | -        | -11.55     | -57.45     |
| Brazil  | South America | Morpara                  | Sao Francisco       | Sao Francisco | G1286     | GRDC     | 3651807     | 345000                      | 337857                    | -        | -        | -11.55     | -43.25     |
| Brazil  | South America | Sao Felix Do Araguaia    | Araguaia            | Tocantins     | G1287     | GRDC     | 3649409     | 193923                      | 192045                    | -        | -        | -11.65     | -50.65     |
| Brazil  | South America | Cachoeirao               | Teles Pires _ Sao   | Amazonas      | G1288     | GRDC     | 3629773     | 34600                       | 34880                     | -        | -        | -11.55     | -55.65     |

| Country | Continent     | Station Name           | River Name          | River Basin   | GloFAS ID | Provider | Provider ID | Catchment Area Provided km² | Catchment Area GloFAS km² | LAT Prov | LON Prov | LAT GloFAS | LON GloFAS |
|---------|---------------|------------------------|---------------------|---------------|-----------|----------|-------------|-----------------------------|---------------------------|----------|----------|------------|------------|
| Brazil  | South America | Sitio Bela Vista       | Ji Parana _ Machado | Amazonas      | G1289     | GRDC     | 3627410     | 16100                       | 16221                     | -        | -        | -11.65     | -61.15     |
| Brazil  | South America | Cachoeira Do Cachimbo  | Branco              | Amazonas      | G1290     | GRDC     | 3627440     | 10100                       | 10371                     | -        | -        | -11.75     | -61.25     |
| Brazil  | South America | Usina Altamira         | Itapicuru           | Itapicuru     | G1291     | GRDC     | 3652039     | 35150                       | 34958                     | -        | -        | -11.75     | -37.85     |
| Brazil  | South America | Fazenda Tombador       | Do Sangue           | Amazonas      | G1292     | GRDC     | 3629900     | 24700                       | 25073                     | -        | -        | -11.75     | -58.05     |
| Brazil  | South America | Fazenda Telesforo      | Araguaia            | Tocantins     | G1293     | GRDC     | 3649414     | 131600                      | 130801                    | -        | -        | -11.85     | -50.65     |
| Brazil  | South America | Jacinto                | Santa Tereza        | Tocantins     | G1295     | GRDC     | 3649211     | 13811                       | 13893                     | -        | -        | -11.95     | -48.65     |
| Brazil  | South America | Peixe                  | Tocantins           | Tocantins     | G1296     | GRDC     | 3649251     | 130052                      | 127812                    | -        | -        | -12.05     | -48.55     |
| Brazil  | South America | Barreira Do Pequi      | Javaes              | Tocantins     | G1297     | GRDC     | 3649461     | 8150                        | 7263                      | -        | -        | -12.05     | -49.95     |
| Brazil  | South America | Riachao Do Jacuibe     | Jacuibe             | Paraguacu     | G1298     | GRDC     | 3652068     | 10560                       | 10293                     | -        | -        | -12.05     | -39.25     |
| Brazil  | South America | Santo Antonio Do       | Das Mortes          | Tocantins     | G1300     | GRDC     | 3649619     | 59163                       | 58496                     | -        | -        | -12.25     | -50.95     |
| Brazil  | South America | Praia Alta             | Formoso             | Tocantins     | G1301     | GRDC     | 3649465     | 6610                        | 5948                      | -        | -        | -12.45     | -49.55     |
| Brazil  | South America | Principe Da Beira      | Guapore             | Amazonas      | G1302     | GRDC     | 3627811     | 341000                      | 345012                    | -        | -        | -12.25     | -64.55     |
| Brazil  | South America | Fazenda Santa Fe       | Paraguacu           | Paraguacu     | G1303     | GRDC     | 3652130     | 31488                       | 31436                     | -        | -        | -12.55     | -39.85     |
| Brazil  | South America | Teles Pires            | Teles Pires _ Sao   | Amazonas      | G1305     | GRDC     | 3629774     | 13900                       | 13818                     | -        | -        | -12.65     | -55.85     |
| Brazil  | South America | Sao Salvador           | Tocantins           | Tocantins     | G1306     | GRDC     | 3649255     | 63522                       | 63226                     | -        | -        | -12.75     | -48.25     |
| Brazil  | South America | Pedras Negras          | Guapore             | Amazonas      | G1309     | GRDC     | 3627810     | 110000                      | 108110                    | -        | -        | -12.85     | -62.95     |
| Brazil  | South America | Luiz Alves             | Araguaia            | Tocantins     | G1311     | GRDC     | 3649413     | 117580                      | 114106                    | -        | -        | -13.25     | -50.55     |
| Brazil  | South America | Bom Jesus Da Lapa      | Sao Francisco       | Sao Francisco | G1313     | GRDC     | 3651806     | 271000                      | 264007                    | -        | -        | -13.25     | -43.45     |
| Brazil  | South America | Porto Roncador         | Teles Pires _ Sao   | Amazonas      | G1317     | GRDC     | 3629775     | 10800                       | 10138                     | -        | -        | -13.55     | -55.35     |
| Brazil  | South America | Jusante Do Rio Pintado | Crixas Acu          | Tocantins     | G1318     | GRDC     | 3649640     | 18600                       | 17832                     | -        | -        | -13.55     | -50.35     |
| Brazil  | South America | Bandeirantes           | Araguaia            | Tocantins     | G1322     | GRDC     | 3649424     | 92638                       | 90486                     | -        | -50.8    | -13.65     | -50.75     |
| Brazil  | South America | Nova Roma _ Faz Sucuri | Parana              | Tocantins     | G1324     | GRDC     | 3649150     | 22834                       | 22474                     | -        | -        | -13.75     | -46.85     |
| Brazil  | South America | Trecho Medio           | Das Mortes          | Tocantins     | G1326     | GRDC     | 3649618     | 44320                       | 40690                     | -        | -        | -14.05     | -51.75     |
| Brazil  | South America | Juvenilia              | Carinhanha          | Sao Francisco | G1327     | GRDC     | 3651535     | 16300                       | 16346                     | -14.26   | -        | -14.25     | -44.15     |
| Brazil  | South America | Porto Uruacu           | Maranhao            | Tocantins     | G1330     | GRDC     | 3649031     | 34334                       | 34176                     | -        | -        | -14.55     | -49.05     |
| Brazil  | South America | Xavantina              | Das Mortes          | Tocantins     | G1332     | GRDC     | 3649617     | 24950                       | 24842                     | -        | -        | -14.65     | -52.35     |
| Brazil  | South America | Colonia Dos Americanos | Das Almas           | Tocantins     | G1334     | GRDC     | 3649014     | 18282                       | 18357                     | -        | -        | -14.75     | -49.05     |
| Brazil  | South America | Manga                  | Sao Francisco       | Sao Francisco | G1335     | GRDC     | 3651805     | 202000                      | 197329                    | -        | -        | -14.75     | -43.95     |
| Brazil  | South America | Aruana                 | Araguaia            | Tocantins     | G1336     | GRDC     | 3649421     | 76964                       | 74851                     | -        | -        | -14.85     | -51.05     |
| Brazil  | South America | Ponte Quebra Linha     | Maranhao            | Tocantins     | G1341     | GRDC     | 3649030     | 11008                       | 10657                     | -        | -        | -14.95     | -48.65     |
| Brazil  | South America | Mato Grosso            | Guapore             | Amazonas      | G1342     | GRDC     | 3627813     | 22500                       | 21836                     | -        | -        | -15.05     | -59.95     |
| Brazil  | South America | Passagem Da Br 309     | Culuene             | Tocantins     | G1345     | GRDC     | 3649614     | 17160                       | 17330                     | -        | -        | -15.25     | -53.05     |
| Brazil  | South America | Ceres Posto Biquinha   | Das Almas           | Tocantins     | G1346     | GRDC     | 3649012     | 10538                       | 10502                     | -        | -        | -15.25     | -49.55     |
| Brazil  | South America | Ipiaú                  | De Contas           | Prado         | G1348     | GRDC     | 3652320     | 30360                       | 30302                     | -        | -        | -15.55     | -39.35     |
| Brazil  | South America | Araguaiana             | Araguaia            | Tocantins     | G1350     | GRDC     | 3649412     | 50930                       | 50835                     | -        | -        | -15.55     | -51.75     |
| Brazil  | South America | Peres                  | Caiapo              | Tocantins     | G1354     | GRDC     | 3649459     | 12084                       | 12062                     | -        | -        | -15.85     | -51.85     |
| Brazil  | South America | Barra Do Garcas        | Araguaia            | Tocantins     | G1355     | GRDC     | 3649422     | 36800                       | 36441                     | -        | -        | -15.85     | -52.05     |
| Brazil  | South America | Itapebi                | Jequitinhonha       | Jequitinhonha | G1357     | GRDC     | 3652455     | 67769                       | 67979                     | -        | -        | -16.05     | -39.45     |
| Brazil  | South America | Caceres Dnpvn          | Paraguay _ Paraguay | Parana        | G1359     | GRDC     | 3666050     | 32774                       | 32380                     | -        | -        | -16.05     | -57.75     |

| Country | Continent     | Station Name           | River Name               | River Basin       | GloFAS ID | Provider | Provider ID | Catchment Area Provided km² | Catchment Area GloFAS km² | LAT Prov | LON Prov | LAT GloFAS | LON GloFAS |
|---------|---------------|------------------------|--------------------------|-------------------|-----------|----------|-------------|-----------------------------|---------------------------|----------|----------|------------|------------|
| Brazil  | South America | Jacinto                | Jequitinhonha            | Jequitinhonha     | G1362     | GRDC     | 3652450     | 63300                       | 62039                     | -        | -        | -16.15     | -40.35     |
| Brazil  | South America | Ponte Do Cedro         | Verde                    | Tocantins         | G1364     | GRDC     | 3649411     | 19100                       | 17926                     | -        | -        | -16.25     | -52.55     |
| Brazil  | South America | Barao De Melgaco       | Cuiaba                   | Parana            | G1366     | GRDC     | 3666401     | 28900                       | 36154                     | -        | -        | -16.55     | -56.35     |
| Brazil  | South America | Rondonopolis           | Vermelho                 | Parana            | G1367     | GRDC     | 3666500     | 21800                       | 22668                     | -        | -        | -16.45     | -54.95     |
| Brazil  | South America | Porto Mandacaru        | Jequitinhonha            | Jequitinhonha     | G1368     | GRDC     | 3652419     | 16230                       | 15320                     | -        | -        | -16.85     | -42.05     |
| Brazil  | South America | Porto Alegre           | Paracatu                 | Sao Francisco     | G1369     | GRDC     | 3651408     | 41300                       | 40755                     | -        | -        | -16.95     | -45.35     |
| Brazil  | South America | Sao Jeronimo           | Piquiri (Trib. Paraguay) | Parana            | G1370     | GRDC     | 3666200     | 17150                       | 22010                     | -        | -        | -17.35     | -55.65     |
| Brazil  | South America | Varzea Da Palma        | Das Velhas               | Sao Francisco     | G1375     | GRDC     | 3651309     | 26500                       | 26084                     | -        | -        | -17.55     | -44.75     |
| Brazil  | South America | Porto Do Alegre        | Cuiaba                   | Parana            | G1376     | GRDC     | 3666400     | 102750                      | 102177                    | -        | -        | -17.65     | -56.95     |
| Brazil  | South America | Coxim                  | Taquari                  | Parana            | G1388     | GRDC     | 3667300     | 27040                       | 27066                     | -        | -        | -18.35     | -55.05     |
| Brazil  | South America | Linhares               | Doce                     | Doce              | G1393     | GRDC     | 3652600     | 78456                       | 77704                     | -        | -        | -19.45     | -40.15     |
| Brazil  | South America | Fazenda Rio Negro      | Negro                    | Parana            | G1394     | GRDC     | 3667100     | 14770                       | 14615                     | -        | -56.2    | -19.65     | -56.05     |
| Brazil  | South America | Porto Esperanca        | Paraguai_ Paraguay       | Parana            | G1395     | GRDC     | 3667020     | 363500                      | 363790                    | -        | -        | -19.55     | -57.45     |
| Brazil  | South America | Miranda                | Miranda                  | Parana            | G1401     | GRDC     | 3667200     | 15460                       | 14379                     | -        | -        | -20.35     | -56.35     |
| Brazil  | South America | Delfino Costa          | Anhandui                 | Parana            | G1409     | GRDC     | 3662300     | 13590                       | 13709                     | -        | -        | -21.65     | -53.05     |
| Brazil  | South America | Paraiba Do Sul         | Paraiba Do Sul           | Paraiba Do Sul    | G1410     | GRDC     | 3652880     | 46731                       | 45078                     | -        | -        | -21.65     | -41.75     |
| Brazil  | South America | Campos Ponte Municipal | Paraiba Do Sul           | Paraiba Do Sul    | G1412     | GRDC     | 3652890     | 55500                       | 54879                     | -        | -        | -21.75     | -41.35     |
| Brazil  | South America | Sao Carlos             | Apa                      | Parana            | G1416     | GRDC     | 3667400     | 11100                       | 10818                     | -        | -        | -22.15     | -57.45     |
| Brazil  | South America | Novo Porto Taquara     | Ivai                     | Parana            | G1423     | GRDC     | 3663650     | 34432                       | 33790                     | -        | -        | -23.25     | -53.45     |
| Brazil  | South America | Jataizinho Ana Cesp    | Tibaji                   | Parana            | G1424     | GRDC     | 3663700     | 21915                       | 21270                     | -        | -        | -23.25     | -50.95     |
| Brazil  | South America | Porto Paraíso Do Norte | Ivai                     | Parana            | G1425     | GRDC     | 3663655     | 28427                       | 27906                     | -        | -        | -23.35     | -52.65     |
| Brazil  | South America | Balsa Santa Maria      | Piquiri (Trib. Parana)   | Parana            | G1428     | GRDC     | 3663200     | 20982                       | 20397                     | -        | -        | -24.15     | -53.75     |
| Brazil  | South America | Iporanga               | Ribeira Do Iguape        | Ribeira Do Iguape | G1430     | GRDC     | 3653120     | 12450                       | 12080                     | -        | -        | -24.55     | -48.55     |
| Brazil  | South America | Salto Osorio Jusante   | Iguacu                   | Parana            | G1438     | GRDC     | 3664150     | 45824                       | 43580                     | -        | -        | -25.55     | -52.95     |
| Brazil  | South America | Porto Capanema         | Iguacu                   | Parana            | G1439     | GRDC     | 3664804     | 65680                       | 62602                     | -        | -        | -25.55     | -53.95     |
| Brazil  | South America | Salto Cataratas        | Iguacu                   | Parana            | G1440     | GRDC     | 3664160     | 67317                       | 64509                     | -        | -        | -25.65     | -54.45     |
| Brazil  | South America | Uniao Da Vitoria       | Iguacu                   | Parana            | G1442     | GRDC     | 3664802     | 24211                       | 23389                     | -        | -        | -26.25     | -51.05     |
| Brazil  | South America | Blumenau Pcd           | Itajai Acu               | Atlantico_Trecho  | G1446     | GRDC     | 3653352     | 11803                       | 11226                     | -        | -        | -26.95     | -49.05     |
| Brazil  | South America | Marcelino Ramos        | Uruguay                  | Uruguay           | G1449     | GRDC     | 3669700     | 41267                       | 40337                     | -        | -        | -27.35     | -52.05     |
| Brazil  | South America | Passo Mariano Pinto    | Ibicui                   | Uruguay           | G1461     | GRDC     | 3669600     | 42498                       | 41044                     | -        | -        | -29.35     | -56.15     |
| Brazil  | South America | -                      | Sao Francisco            | Sao Francisco     | G1710     | DFO      | 21          | -                           | 298453                    | -        | -        | -13.05     | -43.45     |
| Brazil  | South America | -                      | Sao Francisco            | Sao Francisco     | G1711     | DFO      | 22          | -                           | 425720                    | -        | -        | -10.55     | -42.65     |
| Brazil  | South America | -                      | Branco                   | Amazonas          | G1758     | DFO      | 142         | -                           | 178662                    | -0.224   | -        | -0.15      | -61.75     |
| Brazil  | South America | -                      | Negro                    | Amazonas          | G1759     | DFO      | 143         | -                           | 299110                    | -0.405   | -        | -0.35      | -64.45     |
| Brazil  | South America | -                      | Amazon_ Amazonas         | Amazonas          | G1760     | DFO      | 144         | -                           | 1142810                   | -2.565   | -        | -2.55      | -67.35     |
| Brazil  | South America | -                      | Amazon_ Amazonas         | Amazonas          | G1761     | DFO      | 146         | -                           | 4278840                   | -3.195   | -        | -3.15      | -58.35     |
| Brazil  | South America | -                      | Amazon_ Amazonas         | Amazonas          | G1762     | DFO      | 147         | -                           | 4664940                   | -2.115   | -        | -2.15      | -55.35     |
| Brazil  | South America | -                      | Amazon_ Amazonas         | Amazonas          | G1763     | DFO      | 148         | -                           | 5221090                   | -2.205   | -        | -2.25      | -54.15     |
| Brazil  | South America | -                      | Uruguay                  | Uruguay           | G1845     | DFO      | 828         | -                           | 130703                    | -        | -        | -29.35     | -56.65     |

| Country | Continent     | Station Name    | River Name          | River Basin | GloFAS ID | Provider  | Provider ID | Catchment Area Provided km² | Catchment Area GloFAS km² | LAT Prov | LON Prov | LAT GloFAS | LON GloFAS |
|---------|---------------|-----------------|---------------------|-------------|-----------|-----------|-------------|-----------------------------|---------------------------|----------|----------|------------|------------|
| Brazil  | South America | -               | Ibicui              | Uruguay     | G1847     | CEMADE    | 7665000     | 835                         | 28781                     | -        | -        | -29.55     | -55.65     |
| Brazil  | South America | -               | Ibicui              | Uruguay     | G1848     | CEMADE    | 8547000     | 836                         | 26880                     | -        | -        | -29.65     | -55.35     |
| Brazil  | South America | -               | Jacui               | Jacui       | G1849     | DFO       | 838         | -                           | 66005                     | -        | -        | -29.95     | -51.55     |
| Brazil  | South America | -               | Jacui               | Jacui       | G1850     | DFO       | 840         | -                           | 28327                     | -        | -        | -30.05     | -52.95     |
| Brazil  | South America | -               | Jacui               | Jacui       | G1851     | DFO       | 842         | -                           | 24970                     | -        | -        | -29.95     | -53.05     |
| Brazil  | South America | -               | Paraguai _ Paraguay | Parana      | G1856     | DFO       | 861         | -                           | 364695                    | -        | -        | -19.65     | -57.55     |
| Brazil  | South America | Porto Da Manga  | Paraguai _ Paraguay | Parana      | G1857     | CEMADE    | 6689500     | 327000                      | 319816                    | -        | -        | -19.35     | -57.25     |
| Brazil  | South America | Sao Francisco   | Paraguai _ Paraguay | Parana      | G1858     | CEMADE    | 6681000     | 243000                      | 238016                    | -        | -        | -18.35     | -57.35     |
| Brazil  | South America | -               | Jurua               | Amazonas    | G1868     | DFO       | 1079        | -                           | 144970                    | -6.255   | -        | -6.25      | -68.15     |
| Brazil  | South America | -               | Madeira             | Amazonas    | G1873     | DFO       | 1088        | -                           | 1073420                   | -7.605   | -        | -7.65      | -62.95     |
| Brazil  | South America | -               | Purus               | Amazonas    | G1874     | DFO       | 1089        | -                           | 373154                    | -4.275   | -        | -4.25      | -61.75     |
| Brazil  | South America | -               | Japura              | Amazonas    | G1877     | DFO       | 1094        | -                           | 239542                    | -1.845   | -        | -1.85      | -67.15     |
| Brazil  | South America | -               | Madeira             | Amazonas    | G1878     | DFO       | 1096        | -                           | 1302650                   | -3.825   | -        | -3.85      | -59.05     |
| Brazil  | South America | -               | Araguaia            | Tocantins   | G1879     | DFO       | 1112        | -                           | 315397                    | -8.685   | -        | -8.65      | -49.45     |
| Brazil  | South America | Ponte Do Tacutu | Tacutu              | Amazonas    | G5167     | CEMADE    | 1452700     | 24300                       | 26574                     | 3.5675   | -        | 3.55       | -59.95     |
| Brazil  | South America | Mucajai         | Mucajai             | Amazonas    | G5175     | CEMADE    | 1469000     | 19800                       | 20777                     | 2.4714   | -        | 2.55       | -60.95     |
| Brazil  | South America | -               | -                   | -           | G5176     | Synthetic | -           | -                           | 97646                     | -        | -        | 2.55       | -60.85     |
| Brazil  | South America | -               | -                   | -           | G5209     | Synthetic | -           | -                           | 134750                    | -        | -        | 1.05       | -61.35     |
| Brazil  | South America | Fazenda Anaua   | Anaua               | Amazonas    | G5211     | CEMADE    | 1481000     | 5900                        | 21523                     | 1.1292   | -        | -0.95      | -61.25     |
| Brazil  | South America | -               | -                   | -           | G5235     | Synthetic | -           | -                           | 64559                     | -        | -        | -0.05      | -67.35     |
| Brazil  | South America | -               | -                   | -           | G5250     | Synthetic | -           | -                           | 15954                     | -        | -        | -0.25      | -63.95     |
| Brazil  | South America | -               | -                   | -           | G5257     | Synthetic | -           | -                           | 211243                    | -        | -        | -0.35      | -66.35     |
| Brazil  | South America | -               | -                   | -           | G5258     | Synthetic | -           | -                           | 300099                    | -        | -        | -0.35      | -63.95     |
| Brazil  | South America | -               | -                   | -           | G5262     | Synthetic | -           | -                           | 25698                     | -        | -        | -0.45      | -66.35     |
| Brazil  | South America | -               | -                   | -           | G5266     | Synthetic | -           | -                           | 15459                     | -        | -        | -0.55      | -61.35     |
| Brazil  | South America | Base Alalau     | Alalau              | Amazonas    | G5271     | CEMADE    | 1485000     | 7080                        | 17182                     | -        | -60.52   | -0.65      | -61.35     |
| Brazil  | South America | -               | -                   | -           | G5274     | Synthetic | -           | -                           | 325075                    | -        | -        | -0.75      | -63.05     |
| Brazil  | South America | -               | -                   | -           | G5275     | Synthetic | -           | -                           | 43286                     | -        | -        | -0.75      | -62.95     |
| Brazil  | South America | -               | -                   | -           | G5289     | Synthetic | -           | -                           | 191397                    | -        | -        | -1.35      | -61.85     |
| Brazil  | South America | -               | -                   | -           | G5290     | Synthetic | -           | -                           | 60100                     | -        | -        | -1.35      | -51.95     |
| Brazil  | South America | -               | -                   | -           | G5292     | Synthetic | -           | -                           | 403573                    | -        | -        | -1.45      | -61.95     |
| Brazil  | South America | -               | -                   | -           | G5293     | Synthetic | -           | -                           | 41792                     | -        | -        | -1.45      | -56.05     |
| Brazil  | South America | -               | -                   | -           | G5294     | Synthetic | -           | -                           | 37835                     | -        | -        | -1.45      | -52.75     |
| Brazil  | South America | -               | -                   | -           | G5295     | Synthetic | -           | -                           | 5298810                   | -        | -        | -1.45      | -52.05     |
| Brazil  | South America | -               | -                   | -           | G5296     | Synthetic | -           | -                           | 5359150                   | -        | -        | -1.45      | -51.95     |
| Brazil  | South America | -               | -                   | -           | G5301     | Synthetic | -           | -                           | 5257760                   | -        | -        | -1.55      | -52.75     |
| Brazil  | South America | -               | -                   | -           | G5302     | Synthetic | -           | -                           | 510228                    | -        | -        | -1.65      | -52.15     |
| Brazil  | South America | -               | -                   | -           | G5310     | Synthetic | -           | -                           | 212888                    | -        | -        | -1.75      | -68.35     |
| Brazil  | South America | -               | -                   | -           | G5311     | Synthetic | -           | -                           | 15548                     | -        | -        | -1.75      | -68.25     |



| Country | Continent     | Station Name          | River Name | River Basin | GloFAS ID | Provider  | Provider ID | Catchment Area Provided km² | Catchment Area GloFAS km² | LAT Prov | LON Prov | LAT GloFAS | LON GloFAS |
|---------|---------------|-----------------------|------------|-------------|-----------|-----------|-------------|-----------------------------|---------------------------|----------|----------|------------|------------|
| Brazil  | South America | Oriximina             | Trombetas  | Amazonas    | G5312     | CEMADE    | 1690000     | 127000                      | 82720                     | -        | -        | -1.45      | -56.45     |
| Brazil  | South America | -                     | -          | -           | G5313     | Synthetic | -           | -                           | 12566                     | -        | -        | -1.75      | -48.45     |
| Brazil  | South America | -                     | -          | -           | G5314     | Synthetic | -           | -                           | 12824                     | -        | -        | -1.75      | -48.35     |
| Brazil  | South America | -                     | -          | -           | G5318     | Synthetic | -           | -                           | 663661                    | -        | -        | -1.85      | -61.45     |
| Brazil  | South America | -                     | -          | -           | G5319     | Synthetic | -           | -                           | 156863                    | -        | -        | -1.85      | -55.85     |
| Brazil  | South America | -                     | -          | -           | G5320     | Synthetic | -           | -                           | 17011                     | -        | -        | -1.85      | -52.35     |
| Brazil  | South America | -                     | -          | -           | G5321     | Synthetic | -           | -                           | 21821                     | -        | -        | -1.85      | -50.95     |
| Brazil  | South America | -                     | -          | -           | G5323     | Synthetic | -           | -                           | 18871                     | -        | -        | -1.95      | -61.45     |
| Brazil  | South America | -                     | -          | -           | G5324     | Synthetic | -           | -                           | 15319                     | -        | -        | -1.95      | -54.05     |
| Brazil  | South America | -                     | -          | -           | G5325     | Synthetic | -           | -                           | 491118                    | -        | -        | -1.95      | -52.35     |
| Brazil  | South America | -                     | -          | -           | G5329     | Synthetic | -           | -                           | 683026                    | -        | -        | -2.05      | -61.25     |
| Brazil  | South America | -                     | -          | -           | G5330     | Synthetic | -           | -                           | 30160                     | -        | -        | -2.05      | -50.85     |
| Brazil  | South America | -                     | -          | -           | G5337     | Synthetic | -           | -                           | 28152                     | -        | -        | -2.35      | -58.35     |
| Brazil  | South America | Base Siderama Jusante | Jatapu     | Amazonas    | G5338     | CEMADE    | 1620500     | 24600                       | 24602                     | -        | -        | -1.55      | -58.55     |
| Brazil  | South America | -                     | -          | -           | G5339     | Synthetic | -           | -                           | 14911                     | -        | -        | -2.35      | -55.05     |
| Brazil  | South America | -                     | -          | -           | G5340     | Synthetic | -           | -                           | 4668510                   | -        | -        | -2.15      | -55.05     |
| Brazil  | South America | -                     | -          | -           | G5341     | Synthetic | -           | -                           | 27308                     | -        | -        | -2.05      | -54.85     |
| Brazil  | South America | -                     | -          | -           | G5343     | Synthetic | -           | -                           | 67689                     | -        | -        | -2.55      | -57.75     |
| Brazil  | South America | -                     | -          | -           | G5344     | Synthetic | -           | -                           | 488565                    | -        | -        | -2.45      | -54.85     |
| Brazil  | South America | -                     | -          | -           | G5345     | Synthetic | -           | -                           | 5158070                   | -        | -        | -2.45      | -54.75     |
| Brazil  | South America | -                     | -          | -           | G5346     | Synthetic | -           | -                           | 31399                     | -        | -        | -2.45      | -54.05     |
| Brazil  | South America | -                     | -          | -           | G5348     | Synthetic | -           | -                           | 1228160                   | -        | -        | -2.55      | -65.85     |
| Brazil  | South America | -                     | -          | -           | G5349     | Synthetic | -           | -                           | 4295360                   | -        | -        | -2.55      | -57.65     |
| Brazil  | South America | -                     | -          | -           | G5350     | Synthetic | -           | -                           | 4367120                   | -        | -        | -2.55      | -56.75     |
| Brazil  | South America | -                     | -          | -           | G5351     | Synthetic | -           | -                           | 472914                    | -        | -        | -2.55      | -55.15     |
| Brazil  | South America | -                     | -          | -           | G5352     | Synthetic | -           | -                           | 1145270                   | -        | -        | -2.65      | -66.85     |
| Brazil  | South America | -                     | -          | -           | G5353     | Synthetic | -           | -                           | 133432                    | -        | -        | -2.75      | -56.75     |
| Brazil  | South America | -                     | -          | -           | G5354     | Synthetic | -           | -                           | 13051                     | -        | -        | -2.65      | -54.05     |
| Brazil  | South America | Porto Seguro          | Jutai      | Amazonas    | G5355     | CEMADE    | 1224000     | 64400                       | 66749                     | -        | -        | -3.35      | -67.55     |
| Brazil  | South America | -                     | -          | -           | G5356     | Synthetic | -           | -                           | 179936                    | -        | -        | -2.75      | -65.85     |
| Brazil  | South America | -                     | -          | -           | G5357     | Synthetic | -           | -                           | 12700                     | -        | -        | -2.75      | -58.05     |
| Brazil  | South America | -                     | -          | -           | G5358     | Synthetic | -           | -                           | 17485                     | -        | -        | -2.75      | -54.25     |
| Brazil  | South America | -                     | -          | -           | G5361     | Synthetic | -           | -                           | 4281550                   | -        | -        | -2.85      | -58.05     |
| Brazil  | South America | -                     | -          | -           | G5375     | Synthetic | -           | -                           | 1428180                   | -        | -        | -3.25      | -64.75     |
| Brazil  | South America | -                     | -          | -           | G5376     | Synthetic | -           | -                           | 23973                     | -        | -        | -3.25      | -41.95     |
| Brazil  | South America | -                     | -          | -           | G5379     | Synthetic | -           | -                           | 269893                    | -        | -        | -3.35      | -64.55     |
| Brazil  | South America | -                     | -          | -           | G5380     | Synthetic | -           | -                           | 111511                    | -        | -        | -3.25      | -57.75     |
| Brazil  | South America | -                     | -          | -           | G5384     | Synthetic | -           | -                           | 1452870                   | -        | -        | -3.35      | -64.65     |
| Brazil  | South America | -                     | -          | -           | G5385     | Synthetic | -           | -                           | 84862                     | -        | -        | -3.45      | -57.95     |



| Country | Continent     | Station Name          | River Name | River Basin | GloFAS ID | Provider  | Provider ID | Catchment Area Provided km² | Catchment Area GloFAS km² | LAT Prov | LON Prov | LAT GloFAS | LON GloFAS |
|---------|---------------|-----------------------|------------|-------------|-----------|-----------|-------------|-----------------------------|---------------------------|----------|----------|------------|------------|
| Brazil  | South America | -                     | -          | -           | G5390     | Synthetic | -           | -                           | 17372                     | -        | -        | -3.45      | -62.65     |
| Brazil  | South America | -                     | -          | -           | G5391     | Synthetic | -           | -                           | 451909                    | -        | -        | -3.65      | -51.85     |
| Brazil  | South America | Aratoi Grande         | Grajau     | Mearim      | G5392     | CEMADE    | 3338000     | 20300                       | 20355                     | -        | -        | -3.75      | -45.25     |
| Brazil  | South America | -                     | -          | -           | G5396     | Synthetic | -           | -                           | 1782500                   | -        | -        | -4.05      | -62.95     |
| Brazil  | South America | -                     | -          | -           | G5397     | Synthetic | -           | -                           | 2186440                   | -        | -        | -3.65      | -61.45     |
| Brazil  | South America | -                     | -          | -           | G5398     | Synthetic | -           | -                           | 367868                    | -        | -        | -4.45      | -62.05     |
| Brazil  | South America | Pedreiras li          | Mearim     | Mearim      | G5399     | CEMADE    | 3328100     | 24000                       | 23888                     | -4.57    | -        | -4.55      | -44.65     |
| Brazil  | South America | -                     | -          | -           | G5400     | Synthetic | -           | -                           | 48444                     | -        | -        | -3.85      | -67.65     |
| Brazil  | South America | -                     | -          | -           | G5402     | Synthetic | -           | -                           | 141855                    | -        | -        | -3.85      | -52.75     |
| Brazil  | South America | -                     | -          | -           | G5404     | Synthetic | -           | -                           | 12889                     | -        | -        | -3.95      | -67.55     |
| Brazil  | South America | -                     | -          | -           | G5406     | Synthetic | -           | -                           | 301930                    | -        | -        | -3.95      | -52.65     |
| Brazil  | South America | Ladario Jusante       | Itacuai    | Amazonas    | G5413     | CEMADE    | 1091000     | 36900                       | 37097                     | -        | -        | -4.55      | -70.25     |
| Brazil  | South America | -                     | -          | -           | G5425     | Synthetic | -           | -                           | 109433                    | -        | -        | -4.45      | -69.85     |
| Brazil  | South America | Nova Colocacao Caxias | Jutai      | Amazonas    | G5430     | CEMADE    | 1210000     | 10700                       | 20217                     | -        | -        | -4.65      | -68.35     |
| Brazil  | South America | Tanibuca              | Mutum      | Amazonas    | G5434     | CEMADE    | 1218000     | 12700                       | 12862                     | -4.745   | -        | -4.75      | -68.15     |
| Brazil  | South America | Itaituba              | Tapajos    | Amazonas    | G5435     | CEMADE    | 1773000     | 458000                      | 456672                    | -        | -        | -4.25      | -55.95     |
| Brazil  | South America | Jamanxim              | Jamanxim   | Amazonas    | G5439     | CEMADE    | 1768000     | 40200                       | 7598                      | -5.5     | -        | -5.45      | -55.85     |
| Brazil  | South America | -                     | -          | -           | G5453     | Synthetic | -           | -                           | 307358                    | -        | -        | -5.15      | -48.95     |
| Brazil  | South America | Teresina Chesf        | Parnaiba   | Parnaiba    | G5454     | CEMADE    | 3469000     | 237000                      | 235335                    | -5.135   | -        | -5.15      | -42.85     |
| Brazil  | South America | -                     | -          | -           | G5458     | Synthetic | -           | -                           | 1148460                   | -        | -        | -5.25      | -60.55     |
| Brazil  | South America | -                     | -          | -           | G5459     | Synthetic | -           | -                           | 146077                    | -        | -        | -5.25      | -60.35     |
| Brazil  | South America | -                     | -          | -           | G5460     | Synthetic | -           | -                           | 14051                     | -        | -        | -5.25      | -59.75     |
| Brazil  | South America | -                     | -          | -           | G5462     | Synthetic | -           | -                           | 26489                     | -        | -        | -5.35      | -59.75     |
| Brazil  | South America | -                     | -          | -           | G5463     | Synthetic | -           | -                           | 380253                    | -        | -        | -5.35      | -48.85     |
| Brazil  | South America | -                     | -          | -           | G5464     | Synthetic | -           | -                           | 37047                     | -        | -        | -5.45      | -54.45     |
| Brazil  | South America | Fazenda Carnaiba      | Sambito    | Parnaiba    | G5468     | CEMADE    | 3476000     | 16300                       | 16393                     | -        | -42.1    | -5.75      | -42.15     |
| Brazil  | South America | -                     | -          | -           | G5470     | Synthetic | -           | -                           | 325646                    | -        | -        | -5.65      | -63.35     |
| Brazil  | South America | -                     | -          | -           | G5471     | Synthetic | -           | -                           | 18797                     | -        | -        | -5.65      | -63.25     |
| Brazil  | South America | Prata Do Piaui        | Poti       | Parnaiba    | G5472     | CEMADE    | 3477000     | 43400                       | 44118                     | -        | -        | -5.65      | -42.25     |
| Brazil  | South America | -                     | -          | -           | G5474     | Synthetic | -           | -                           | 63204                     | -        | -        | -5.85      | -64.55     |
| Brazil  | South America | -                     | -          | -           | G5475     | Synthetic | -           | -                           | 13433                     | -        | -        | -5.85      | -57.25     |
| Brazil  | South America | -                     | -          | -           | G5478     | Synthetic | -           | -                           | 20815                     | -        | -        | -5.95      | -64.85     |
| Brazil  | South America | -                     | -          | -           | G5479     | Synthetic | -           | -                           | 251062                    | -        | -        | -5.95      | -64.45     |
| Brazil  | South America | -                     | -          | -           | G5482     | Synthetic | -           | -                           | 1089660                   | -        | -        | -6.15      | -61.85     |
| Brazil  | South America | -                     | -          | -           | G5483     | Synthetic | -           | -                           | 27886                     | -        | -        | -6.15      | -61.75     |
| Brazil  | South America | -                     | -          | -           | G5486     | Synthetic | -           | -                           | 20829                     | -        | -        | -6.35      | -55.65     |
| Brazil  | South America | Barao De Grajau       | Parnaiba   | Parnaiba    | G5487     | CEMADE    | 3431100     | 140000                      | 149385                    | -        | -        | -6.75      | -42.95     |
| Brazil  | South America | Francisco Ayres       | Caninde    | Parnaiba    | G5488     | CEMADE    | 3460000     | 73700                       | 73834                     | -        | -        | -6.45      | -42.75     |
| Brazil  | South America | Jardim Do Ouro        | Jamanxim   | Amazonas    | G5490     | CEMADE    | 1767500     | 37400                       | 37407                     | -        | -        | -6.25      | -55.75     |

| Country | Continent     | Station Name             | River Name          | River Basin   | GloFAS ID | Provider  | Provider ID | Catchment Area Provided km² | Catchment Area GloFAS km² | LAT Prov | LON Prov | LAT GloFAS | LON GloFAS |
|---------|---------------|--------------------------|---------------------|---------------|-----------|-----------|-------------|-----------------------------|---------------------------|----------|----------|------------|------------|
| Brazil  | South America | -                        | -                   | -             | G5497     | Synthetic | -           | -                           | 37396                     | -        | -        | -6.65      | -42.75     |
| Brazil  | South America | -                        | -                   | -             | G5498     | Synthetic | -           | -                           | 35827                     | -        | -        | -6.65      | -42.65     |
| Brazil  | South America | -                        | -                   | -             | G5501     | Synthetic | -           | -                           | 54823                     | -        | -        | -6.75      | -69.75     |
| Brazil  | South America | -                        | -                   | -             | G5503     | Synthetic | -           | -                           | 88201                     | -        | -        | -6.85      | -43.45     |
| Brazil  | South America | Barra Do Lance           | Gurgueia            | Parnaiba      | G5506     | CEMADE    | 3427000     | 47000                       | 46814                     | -        | -        | -7.25      | -43.65     |
| Brazil  | South America | -                        | -                   | -             | G5513     | Synthetic | -           | -                           | 181841                    | -        | -        | -7.25      | -64.95     |
| Brazil  | South America | Sao Felix De Balsas      | Das Balsas          | Parnaiba      | G5514     | CEMADE    | 3417000     | 24700                       | 24468                     | -        | -        | -7.05      | -44.85     |
| Brazil  | South America | Sitio Do Velho           | Parnaiba            | Parnaiba      | G5517     | CEMADE    | 3407000     | 35300                       | 35511                     | -        | -        | -7.35      | -44.75     |
| Brazil  | South America | -                        | -                   | -             | G5518     | Synthetic | -           | -                           | 51778                     | -        | -        | -7.35      | -44.65     |
| Brazil  | South America | Fazenda Bandeira         | Urucui Preto        | Parnaiba      | G5519     | CEMADE    | 3409000     | 15600                       | 15780                     | -        | -        | -7.45      | -44.65     |
| Brazil  | South America | -                        | -                   | -             | G5522     | Synthetic | -           | -                           | 13621                     | -        | -        | -7.55      | -49.45     |
| Brazil  | South America | Goiatins                 | Manuel Alves Grande | Tocantins     | G5523     | CEMADE    | 2325000     | 10100                       | 9964                      | -        | -        | -7.75      | -47.35     |
| Brazil  | South America | -                        | -                   | -             | G5527     | Synthetic | -           | -                           | 328763                    | -        | -        | -7.65      | -49.35     |
| Brazil  | South America | -                        | -                   | -             | G5529     | Synthetic | -           | -                           | 25077                     | -        | -        | -7.75      | -67.15     |
| Brazil  | South America | -                        | -                   | -             | G5534     | Synthetic | -           | -                           | 1007450                   | -        | -        | -8.15      | -62.95     |
| Brazil  | South America | -                        | -                   | -             | G5535     | Synthetic | -           | -                           | 63289                     | -        | -        | -8.15      | -62.85     |
| Brazil  | South America | -                        | -                   | -             | G5542     | Synthetic | -           | -                           | 12994                     | -        | -        | -8.55      | -67.55     |
| Brazil  | South America | -                        | -                   | -             | G5543     | Synthetic | -           | -                           | 976619                    | -        | -        | -8.55      | -63.55     |
| Brazil  | South America | -                        | -                   | -             | G5544     | Synthetic | -           | -                           | 13751                     | -        | -        | -8.55      | -39.65     |
| Brazil  | South America | Santa Maria Da Boa Vista | Sao Francisco       | Sao Francisco | G5546     | CEMADE    | 4829000     | 535000                      | 526728                    | -        | -        | -8.85      | -39.75     |
| Brazil  | South America | -                        | -                   | -             | G5549     | Synthetic | -           | -                           | 68319                     | -        | -        | -8.75      | -67.55     |
| Brazil  | South America | -                        | -                   | -             | G5550     | Synthetic | -           | -                           | 35546                     | -        | -        | -8.85      | -67.35     |
| Brazil  | South America | -                        | -                   | -             | G5551     | Synthetic | -           | -                           | 189967                    | -        | -        | -9.05      | -48.25     |
| Brazil  | South America | -                        | -                   | -             | G5552     | Synthetic | -           | -                           | 947511                    | -        | -        | -9.15      | -64.45     |
| Brazil  | South America | -                        | -                   | -             | G5553     | Synthetic | -           | -                           | 13208                     | -        | -        | -9.15      | -56.95     |
| Brazil  | South America | -                        | -                   | -             | G5555     | Synthetic | -           | -                           | 13028                     | -        | -        | -9.25      | -64.35     |
| Brazil  | South America | -                        | -                   | -             | G5556     | Synthetic | -           | -                           | 16514                     | -        | -        | -9.25      | -57.15     |
| Brazil  | South America | -                        | -                   | -             | G5557     | Synthetic | -           | -                           | 89466                     | -        | -        | -9.25      | -57.05     |
| Brazil  | South America | Juazeiro                 | Sao Francisco       | Sao Francisco | G5559     | CEMADE    | 4802000     | 516000                      | 507607                    | -        | -        | -9.45      | -40.55     |
| Brazil  | South America | Abreus                   | Vereda Da Tabua _   | Sao Francisco | G5560     | CEMADE    | 4790000     | 12500                       | 12508                     | -        | -        | -9.95      | -40.65     |
| Brazil  | South America | -                        | -                   | -             | G5562     | Synthetic | -           | -                           | 156782                    | -        | -        | -9.65      | -52.35     |
| Brazil  | South America | -                        | -                   | -             | G5565     | Synthetic | -           | -                           | 14196                     | -        | -        | -9.75      | -52.25     |
| Brazil  | South America | -                        | -                   | -             | G5566     | Synthetic | -           | -                           | 223159                    | -        | -        | -9.85      | -50.25     |
| Brazil  | South America | -                        | -                   | -             | G5567     | Synthetic | -           | -                           | 52188                     | -        | -        | -9.85      | -50.15     |
| Brazil  | South America | -                        | -                   | -             | G5568     | Synthetic | -           | -                           | 12264                     | -        | -        | -9.95      | -47.85     |
| Brazil  | South America | -                        | -                   | -             | G5569     | Synthetic | -           | -                           | 13156                     | -        | -        | -10.15     | -42.55     |
| Brazil  | South America | -                        | -                   | -             | G5570     | Synthetic | -           | -                           | 15110                     | -        | -        | -10.15     | -42.15     |
| Brazil  | South America | Arinos                   | Arinos              | Amazonas      | G5572     | CEMADE    | 1712300     | 57100                       | 56459                     | -        | -        | -10.65     | -57.95     |
| Brazil  | South America | -                        | -                   | -             | G5575     | Synthetic | -           | -                           | 92502                     | -        | -        | -10.55     | -58.45     |

| Country | Continent     | Station Name          | River Name        | River Basin   | GloFAS ID | Provider  | Provider ID | Catchment Area Provided km² | Catchment Area GloFAS km² | LAT Prov | LON Prov | LAT GloFAS | LON GloFAS |
|---------|---------------|-----------------------|-------------------|---------------|-----------|-----------|-------------|-----------------------------|---------------------------|----------|----------|------------|------------|
| Brazil  | South America | Jusante Rio Beni      | Madeira           | Amazonas      | G5577     | CEMADE    | 1065008     | 834000                      | 902070                    | -        | -        | -10.45     | -65.45     |
| Brazil  | South America | -                     | -                 | -             | G5578     | Synthetic | -           | -                           | 20880                     | -        | -        | -10.65     | -50.65     |
| Brazil  | South America | Rio Dos Peixes        | Dos Peixes        | Amazonas      | G5581     | CEMADE    | 1712200     | 14400                       | 14626                     | -        | -        | -10.85     | -57.75     |
| Brazil  | South America | -                     | -                 | -             | G5582     | Synthetic | -           | -                           | 194203                    | -        | -        | -10.75     | -50.55     |
| Brazil  | South America | -                     | -                 | -             | G5583     | Synthetic | -           | -                           | 21281                     | -        | -        | -10.75     | -49.85     |
| Brazil  | South America | -                     | -                 | -             | G5586     | Synthetic | -           | -                           | 41472                     | -        | -        | -10.85     | -57.95     |
| Brazil  | South America | -                     | -                 | -             | G5589     | Synthetic | -           | -                           | 16078                     | -        | -        | -11.05     | -65.15     |
| Brazil  | South America | -                     | -                 | -             | G5590     | Synthetic | -           | -                           | 58069                     | -        | -        | -11.05     | -58.35     |
| Brazil  | South America | -                     | -                 | -             | G5591     | Synthetic | -           | -                           | 29028                     | -        | -        | -11.05     | -58.25     |
| Brazil  | South America | Riacho De Deus        | Manissaua Micu    | Amazonas      | G5592     | CEMADE    | 1842200     | 11600                       | 11598                     | -        | -        | -11.15     | -54.45     |
| Brazil  | South America | -                     | -                 | -             | G5593     | Synthetic | -           | -                           | 102997                    | -        | -        | -11.05     | -53.25     |
| Brazil  | South America | Fazenda Macambira     | Grande            | Sao Francisco | G5597     | CEMADE    | 4667500     | 39600                       | 39722                     | -        | -        | -11.55     | -44.05     |
| Brazil  | South America | -                     | -                 | -             | G5599     | Synthetic | -           | -                           | 78058                     | -        | -        | -11.35     | -53.35     |
| Brazil  | South America | -                     | -                 | -             | G5600     | Synthetic | -           | -                           | 23859                     | -        | -        | -11.35     | -53.15     |
| Brazil  | South America | -                     | -                 | -             | G5601     | Synthetic | -           | -                           | 147086                    | -        | -        | -11.35     | -48.55     |
| Brazil  | South America | -                     | -                 | -             | G5605     | Synthetic | -           | -                           | 13311                     | -        | -        | -11.75     | -55.85     |
| Brazil  | South America | Fazenda Tratex        | Teles Pires _ Sao | Amazonas      | G5606     | CEMADE    | 1730000     | 40700                       | 40036                     | -        | -        | -10.95     | -55.65     |
| Brazil  | South America | -                     | -                 | -             | G5609     | Synthetic | -           | -                           | 29211                     | -        | -        | -11.95     | -58.55     |
| Brazil  | South America | Pousada Matrinxa      | Culuene           | Amazonas      | G5610     | CEMADE    | 1841500     | 11600                       | 11905                     | -        | -        | -13.45     | -53.05     |
| Brazil  | South America | -                     | -                 | -             | G5611     | Synthetic | -           | -                           | 22154                     | -        | -        | -12.05     | -58.45     |
| Brazil  | South America | -                     | -                 | -             | G5612     | Synthetic | -           | -                           | 24233                     | -        | -        | -12.05     | -53.65     |
| Brazil  | South America | -                     | -                 | -             | G5613     | Synthetic | -           | -                           | 11983                     | -        | -        | -12.15     | -53.85     |
| Brazil  | South America | -                     | -                 | -             | G5616     | Synthetic | -           | -                           | 12772                     | -        | -        | -12.25     | -50.75     |
| Brazil  | South America | -                     | -                 | -             | G5619     | Synthetic | -           | -                           | 15635                     | -        | -        | -12.35     | -58.85     |
| Brazil  | South America | -                     | -                 | -             | G5621     | Synthetic | -           | -                           | 137351                    | -        | -        | -12.45     | -64.25     |
| Brazil  | South America | -                     | -                 | -             | G5622     | Synthetic | -           | -                           | 12323                     | -        | -        | -12.45     | -39.05     |
| Brazil  | South America | -                     | -                 | -             | G5629     | Synthetic | -           | -                           | 18008                     | -        | -        | -12.55     | -47.75     |
| Brazil  | South America | Argoim                | Paraguacu         | Paraguacu     | G5630     | CEMADE    | 5135000     | 37900                       | 37642                     | -        | -        | -12.65     | -39.45     |
| Brazil  | South America | -                     | -                 | -             | G5637     | Synthetic | -           | -                           | 39429                     | -        | -        | -12.75     | -47.85     |
| Brazil  | South America | -                     | -                 | -             | G5641     | Synthetic | -           | -                           | 91078                     | -        | -        | -13.45     | -50.65     |
| Brazil  | South America | -                     | -                 | -             | G5642     | Synthetic | -           | -                           | 22316                     | -        | -        | -13.45     | -50.55     |
| Brazil  | South America | Carinhanha            | Sao Francisco     | Sao Francisco | G5654     | CEMADE    | 4529800     | 254000                      | 247469                    | -        | -        | -14.25     | -43.75     |
| Brazil  | South America | -                     | -                 | -             | G5684     | Synthetic | -           | -                           | 16535                     | -        | -        | -15.95     | -52.35     |
| Brazil  | South America | -                     | -                 | -             | G5686     | Synthetic | -           | -                           | 18741                     | -        | -        | -16.05     | -52.35     |
| Brazil  | South America | Barra Do Escuro       | Urucuia           | Sao Francisco | G5690     | CEMADE    | 4398000     | 24600                       | 24731                     | -        | -        | -16.15     | -45.15     |
| Brazil  | South America | Sao Romao             | Sao Francisco     | Sao Francisco | G5691     | CEMADE    | 4320000     | 154000                      | 150843                    | -        | -45.07   | -16.35     | -45.05     |
| Brazil  | South America | Cachoeira Da Manteiga | Sao Francisco     | Sao Francisco | G5705     | CEMADE    | 4221000     | 107000                      | 103706                    | -        | -        | -16.65     | -45.05     |
| Brazil  | South America | Porto Da Extrema      | Paracatu          | Sao Francisco | G5712     | CEMADE    | 4269000     | 30100                       | 29696                     | -        | -        | -17.05     | -45.95     |
| Brazil  | South America | Santa Rosa            | Paracatu          | Sao Francisco | G5716     | CEMADE    | 4239500     | 12800                       | 12755                     | -        | -        | -17.25     | -46.45     |

| Country | Continent     | Station Name          | River Name             | River Basin   | GloFAS ID | Provider  | Provider ID | Catchment Area Provided km² | Catchment Area GloFAS km² | LAT Prov | LON Prov | LAT GloFAS | LON GloFAS |
|---------|---------------|-----------------------|------------------------|---------------|-----------|-----------|-------------|-----------------------------|---------------------------|----------|----------|------------|------------|
| Brazil  | South America | Sao Jose Do Borireu   | Sao Lourenco           | Parana        | G5719     | CEMADE    | 6647000     | 24100                       | 24755                     | -        | -        | -16.85     | -56.15     |
| Brazil  | South America | Pousada Taiana Ex     | Cuiaba                 | Parana        | G5720     | CEMADE    | 6671000     | 95200                       | 98727                     | -        | -        | -17.45     | -56.85     |
| Brazil  | South America | -                     | -                      | -             | G5721     | Synthetic | -           | -                           | 53347                     | -        | -        | -17.25     | -56.35     |
| Brazil  | South America | Pirapora Barreiro     | Sao Francisco          | Sao Francisco | G5722     | CEMADE    | 4113500     | 62200                       | 60284                     | -        | -        | -17.25     | -44.95     |
| Brazil  | South America | Sao Jose Do Piquiri   | Piquiri (Trib. Parana) | Parana        | G5725     | CEMADE    | 6665000     | 30000                       | 25565                     | -        | -        | -17.15     | -56.25     |
| Brazil  | South America | -                     | -                      | -             | G5738     | Synthetic | -           | -                           | 122976                    | -        | -        | -17.85     | -57.55     |
| Brazil  | South America | Amolar                | Paraguai _ Paraguay    | Parana        | G5739     | CEMADE    | 6680000     | 234000                      | 231825                    | -        | -        | -18.05     | -57.45     |
| Brazil  | South America | Maurilandia           | Verde _ Verdao         | Parana        | G5745     | CEMADE    | 6079800     | 12800                       | 12552                     | -        | -        | -18.05     | -50.25     |
| Brazil  | South America | Fazenda Santa Maria   | Dos Bois               | Parana        | G5746     | CEMADE    | 6077200     | 17300                       | 17334                     | -        | -        | -17.95     | -50.25     |
| Brazil  | South America | -                     | -                      | -             | G5752     | Synthetic | -           | -                           | 34391                     | -        | -        | -18.25     | -48.95     |
| Brazil  | South America | Ponte Meia Ponte      | Meia Ponte             | Parana        | G5754     | CEMADE    | 6068000     | 11500                       | 11093                     | -        | -        | -18.35     | -49.65     |
| Brazil  | South America | -                     | -                      | -             | G5755     | Synthetic | -           | -                           | 21657                     | -        | -        | -18.45     | -48.65     |
| Brazil  | South America | -                     | -                      | -             | G5760     | Synthetic | -           | -                           | 34239                     | -        | -        | -18.55     | -50.05     |
| Brazil  | South America | -                     | -                      | -             | G5761     | Synthetic | -           | -                           | 95045                     | -        | -        | -18.45     | -49.15     |
| Brazil  | South America | Confluencia Rio Jauru | Coxim                  | Parana        | G5765     | CEMADE    | 6684900     | 7380                        | 13660                     | -        | -        | -18.65     | -54.65     |
| Brazil  | South America | -                     | -                      | -             | G5766     | Synthetic | -           | -                           | 111617                    | -        | -        | -18.65     | -49.95     |
| Brazil  | South America | Tumiritinga           | Doce                   | Doce          | G5769     | CEMADE    | 5692000     | 55100                       | 54403                     | -        | -        | -18.95     | -41.65     |
| Brazil  | South America | -                     | -                      | -             | G5771     | Synthetic | -           | -                           | 48947                     | -        | -        | -18.15     | -45.25     |
| Brazil  | South America | Governador Valadares  | Doce                   | Doce          | G5772     | CEMADE    | 5685000     | 40500                       | 39536                     | -        | -        | -18.85     | -41.95     |
| Brazil  | South America | -                     | -                      | -             | G5774     | Synthetic | -           | -                           | 13215                     | -        | -        | -18.85     | -45.05     |
| Brazil  | South America | -                     | -                      | -             | G5779     | Synthetic | -           | -                           | 31862                     | -        | -        | -19.05     | -57.25     |
| Brazil  | South America | -                     | -                      | -             | G5780     | Synthetic | -           | -                           | 13200                     | -        | -        | -19.05     | -50.65     |
| Brazil  | South America | Ladario Base Naval    | Paraguai _ Paraguay    | Parana        | G5781     | CEMADE    | 6682500     | 253000                      | 251257                    | -        | -        | -19.05     | -57.55     |
| Brazil  | South America | -                     | -                      | -             | G5782     | Synthetic | -           | -                           | 289623                    | -        | -        | -19.15     | -57.25     |
| Brazil  | South America | -                     | -                      | -             | G5783     | Synthetic | -           | -                           | 12029                     | -        | -        | -19.15     | -50.75     |
| Brazil  | South America | -                     | -                      | -             | G5784     | Synthetic | -           | -                           | 181812                    | -        | -        | -19.15     | -50.65     |
| Brazil  | South America | -                     | -                      | -             | G5785     | Synthetic | -           | -                           | 168499                    | -        | -        | -19.15     | -50.55     |
| Brazil  | South America | Porto Das Andorinhas  | Sao Francisco          | Sao Francisco | G5787     | CEMADE    | 4010000     | 14000                       | 13193                     | -        | -        | -19.25     | -45.25     |
| Brazil  | South America | Porto Ciriaco         | Aquidauana             | Parana        | G5795     | CEMADE    | 6695000     | 17200                       | 18316                     | -        | -        | -19.75     | -56.15     |
| Brazil  | South America | Estrada Mt 738        | Miranda                | Parana        | G5796     | CEMADE    | 6690000     | 11600                       | 11017                     | -        | -        | -20.75     | -56.15     |
| Brazil  | South America | -                     | -                      | -             | G5799     | Synthetic | -           | -                           | 219527                    | -        | -        | -20.05     | -51.05     |
| Brazil  | South America | -                     | -                      | -             | G5801     | Synthetic | -           | -                           | 66245                     | -        | -        | -20.15     | -48.25     |
| Brazil  | South America | -                     | -                      | -             | G5805     | Synthetic | -           | -                           | 34071                     | -        | -        | -20.25     | -48.55     |
| Brazil  | South America | -                     | -                      | -             | G5811     | Synthetic | -           | -                           | 370780                    | -        | -        | -20.45     | -51.45     |
| Brazil  | South America | Porto Galeano         | Sucuriu                | Parana        | G5816     | CEMADE    | 6300310     | 19000                       | 18951                     | -        | -        | -20.05     | -52.15     |
| Brazil  | South America | -                     | -                      | -             | G5817     | Synthetic | -           | -                           | 440759                    | -        | -        | -20.65     | -51.55     |
| Brazil  | South America | -                     | -                      | -             | G5818     | Synthetic | -           | -                           | 68745                     | -        | -        | -20.65     | -51.35     |
| Brazil  | South America | -                     | -                      | -             | G5820     | Synthetic | -           | -                           | 51306                     | -        | -        | -20.65     | -46.35     |
| Brazil  | South America | Barranco Branco       | Paraguai _ Paraguay    | Parana        | G5832     | CEMADE    | 6703000     | 546000                      | 538139                    | -        | -        | -20.95     | -57.85     |

| Country | Continent     | Station Name           | River Name      | River Basin          | GloFAS ID | Provider  | Provider ID | Catchment Area Provided km² | Catchment Area GloFAS km² | LAT Prov | LON Prov | LAT GloFAS | LON GloFAS |
|---------|---------------|------------------------|-----------------|----------------------|-----------|-----------|-------------|-----------------------------|---------------------------|----------|----------|------------|------------|
| Brazil  | South America | Agua Clara             | Verde           | Parana               | G5833     | CEMADE    | 6335010     | 14500                       | 14909                     | -        | -        | -20.45     | -52.85     |
| Brazil  | South America | -                      | -               | -                    | G5834     | Synthetic | -           | -                           | 466777                    | -        | -        | -20.95     | -51.65     |
| Brazil  | South America | Ponte Guatapara        | Mogi Guacu      | Parana               | G5840     | CEMADE    | 6191200     | 13900                       | 13686                     | -        | -        | -21.55     | -48.05     |
| Brazil  | South America | Clube De Regatas       | Pardo Sao Paulo | Parana               | G5841     | CEMADE    | 6183400     | 10700                       | 10776                     | -        | -        | -21.05     | -47.85     |
| Brazil  | South America | -                      | -               | -                    | G5842     | Synthetic | -           | -                           | 479429                    | -        | -        | -21.15     | -51.85     |
| Brazil  | South America | -                      | -               | -                    | G5843     | Synthetic | -           | -                           | 11423                     | -        | -        | -21.15     | -51.65     |
| Brazil  | South America | Fazenda Buriti         | Pardo           | Parana               | G5850     | CEMADE    | 6397000     | 31000                       | 30852                     | -        | -        | -21.65     | -52.85     |
| Brazil  | South America | -                      | -               | -                    | G5851     | Synthetic | -           | -                           | 516232                    | -        | -        | -21.65     | -52.05     |
| Brazil  | South America | -                      | -               | -                    | G5853     | Synthetic | -           | -                           | 56888                     | -        | -        | -25.55     | -53.55     |
| Brazil  | South America | -                      | -               | -                    | G5863     | Synthetic | -           | -                           | 560007                    | -        | -        | -22.55     | -53.05     |
| Brazil  | South America | -                      | -               | -                    | G5870     | Synthetic | -           | -                           | 97800                     | -        | -        | -22.55     | -52.95     |
| Brazil  | South America | -                      | -               | -                    | G5871     | Synthetic | -           | -                           | 11292                     | -        | -        | -22.65     | -48.15     |
| Brazil  | South America | -                      | -               | -                    | G5872     | Synthetic | -           | -                           | 18398                     | -        | -        | -22.75     | -48.15     |
| Brazil  | South America | Ivinhema               | Ivinheima       | Parana               | G5873     | CEMADE    | 6461700     | 31900                       | 30751                     | -        | -        | -22.45     | -53.55     |
| Brazil  | South America | Porto Sao Jose Jusante | Parana          | Parana               | G5879     | CEMADE    | 6457500     | 676000                      | 659123                    | -        | -        | -22.75     | -53.25     |
| Brazil  | South America | -                      | -               | -                    | G5887     | Synthetic | -           | -                           | 699415                    | -        | -        | -23.25     | -53.75     |
| Brazil  | South America | -                      | -               | -                    | G5897     | Synthetic | -           | -                           | 28970                     | -        | -        | -25.95     | -51.65     |
| Brazil  | South America | -                      | -               | -                    | G5902     | Synthetic | -           | -                           | 42094                     | -        | -        | -25.65     | -52.75     |
| Brazil  | South America | Guaira                 | Parana          | Parana               | G5903     | CEMADE    | 6484300     | -                           | 781246                    | -        | -        | -24.05     | -54.25     |
| Brazil  | South America | Passo Caru             | Canoas          | Uruguay              | G5970     | CEMADE    | 7155000     | -                           | 9611                      | -        | -        | -27.55     | -50.85     |
| Brazil  | South America | -                      | -               | -                    | G5973     | Synthetic | -           | -                           | 11851                     | -        | -        | -27.75     | -51.25     |
| Brazil  | South America | Encantado              | Taquari         | Jacui                | G6009     | CEMADE    | 8672000     | -                           | 17427                     | -        | -        | -29.25     | -51.85     |
| Brazil  | South America | Rio Pardo              | Jacui           | Jacui                | G6012     | CEMADE    | 8590000     | -                           | 35999                     | -        | -        | -29.95     | -52.35     |
| Brazil  | South America | Uruguiana              | Uruguay         | Uruguay              | G6018     | CEMADE    | 7715000     | -                           | 180262                    | -        | -        | -29.75     | -57.15     |
| Chile   | South America | D J San Salvador       | Loa             | Loa                  | G5804     | DGA       | 2112006     | 12806                       | 13028                     | -        | -69.53   | -22.45     | -69.45     |
| Chile   | South America | EN PANAMERICANA        | LLUTA           | Rio Lluta            | G5830     | DGA       | 1211001     | -                           | 3667                      | -18.4    | -70.3    | -18.45     | -70.25     |
| Chile   | South America | En Almendral           | Elqui           | Rio Elqui Medio (Jta | G5984     | DGA       | 4323001     | -                           | 6162                      | -        | -        | -30.05     | -70.85     |
| Chile   | South America | En La Puerta           | Copiapó         | Copiapó              | G6016     | DGA       | 3431001     | -                           | 15983                     | -        | -        | -27.45     | -70.25     |
| Chile   | South America | En Angostura De Pangué | Hurtado         | Limari               | G6028     | DGA       | 4503001     | -                           | 1875                      | -        | -        | -30.45     | -70.95     |
| Chile   | South America | En Puntilla San Juan   | Rio Grande      | Rio Limari           | G6031     | DGA       | 4523002     | -                           | 3334                      | -        | -        | -30.75     | -70.95     |
| Chile   | South America | Rinconada De Maipo     | Mapocho         | Rio Maipo            | G6042     | DGA       | 5737002     | -                           | 3847                      | -        | -        | -33.55     | -70.85     |
| Chile   | South America | En San Fabian N 2      | Uble            | Rio Itata            | G6043     | DGA       | 8106002     | -                           | 1485                      | -        | -        | -36.55     | -71.55     |
| Chile   | South America | En Los Almendros       | Mapocho         | Rio Maipo            | G6044     | DGA       | 5722002     | -                           | 844                       | -        | -        | -33.35     | -70.45     |
| Chile   | South America | En Longitudinal        | Maule           | Rio Maule            | G6046     | DGA       | 7322001     | -                           | 5334                      | -        | -        | -35.55     | -71.65     |
| Chile   | South America | En Talca               | Claro           | Rio Maule            | G6057     | DGA       | 7379001     | -                           | 2337                      | -        | -        | -35.35     | -71.65     |
| Chile   | South America | -                      | -               | -                    | G6058     | Synthetic | -           | -                           | 12100                     | -        | -        | -34.05     | -71.65     |
| Chile   | South America | -                      | -               | -                    | G6075     | Synthetic | -           | -                           | 859                       | -        | -        | -37.45     | -71.45     |
| Chile   | South America | En Bueno               | Bueno           | Bueno                | G6076     | DGA       | 1031100     | 3714                        | 3665                      | -        | -        | -40.35     | -72.95     |
| Chile   | South America | Rio Biobio en Coihue   | Biobio          | Biobio               | G6077     | DGA       | 8334001     | -                           | 13365                     | -        | -        | -37.55     | -72.65     |

| Country  | Continent     | Station Name          | River Name       | River Basin  | GloFAS ID | Provider  | Provider ID | Catchment Area Provided km² | Catchment Area GloFAS km² | LAT Prov | LON Prov | LAT GloFAS | LON GloFAS |
|----------|---------------|-----------------------|------------------|--------------|-----------|-----------|-------------|-----------------------------|---------------------------|----------|----------|------------|------------|
| Chile    | South America | En La Frontera        | Futaleufu        | Yelcho       | G6078     | DGA       | 1070200     | -                           | 5896                      | -        | -        | -43.15     | -71.65     |
| Chile    | South America | En Colonia            | Rio Baker        | Rio Baker    | G6080     | DGA       | 1154200     | -                           | 17650                     | -47.35   | -72.85   | -47.35     | -72.85     |
| Chile    | South America | En Puerto Aysen       | Aisen            | Aisen        | G6081     | DGA       | 1134200     | -                           | 8982                      | -        | -        | -45.45     | -72.65     |
| Chile    | South America | Bajo Junta Rosselot   | Palena           | Rio Palena Y | G6082     | DGA       | 1104000     | -                           | 5232                      | -        | -        | -43.85     | -72.35     |
| Colombia | South America | Vila Bittencourt      | Caqueta _ Japura | Amazonas     | G1150     | GRDC      | 3621400     | 197136                      | 206592                    | -        | -        | -1.35      | -69.45     |
| Colombia | South America | El Banco              | Magdalena        | Magdalena    | G1690     | IDEAM     | 2502702     | 159989                      | 162941                    | 8.9915   | -        | 8.95       | -73.95     |
| Colombia | South America | Puerto Salgar         | Magdalena        | Magdalena    | G1691     | IDEAM     | 2303701     | 55649                       | 56851                     | 5.4794   | -        | 5.55       | -74.65     |
| Colombia | South America | LAS VARAS             | CAUCA            | Magdalena    | G1692     | IDEAM     | 2502720     | 58117                       | 58807                     | 8.3877   | -        | 8.25       | -74.75     |
| Colombia | South America | Paz De Rio            | Chicamocha       | Magdalena    | G1693     | IDEAM     | 2403751     | -                           | 3330                      | 6        | -        | 5.95       | -72.75     |
| Colombia | South America | Capitanejo            | Chicamoca        | Magdalena    | G1694     | IDEAM     | 2403739     | -                           | 5794                      | 6.5      | -72.35   | 6.45       | -72.65     |
| Colombia | South America | La Coquera            | CAUCA            | Magdalena    | G1695     | IDEAM     | 2624702     | 40757                       | 41097                     | 7.9620   | -        | 7.95       | -75.25     |
| Colombia | South America | -                     | Atrato           | Atrato       | G1721     | DFO       | 40          | -                           | 22796                     | 7.154    | -        | 7.15       | -76.95     |
| Colombia | South America | -                     | Nechi            | Magdalena    | G1752     | DFO       | 132         | -                           | 13043                     | 7.874    | -        | 7.85       | -74.85     |
| Colombia | South America | Puerto Berrio         | MAGDALENA        | Magdalena    | G1753     | IDEAM     | 2309703     | 73766                       | 75225                     | 6.4855   | -        | 6.35       | -74.45     |
| Colombia | South America | -                     | Guviare          | Orinoco      | G1865     | DFO       | 1075        | -                           | 39818                     | 2.834    | -        | 2.85       | -72.25     |
| Colombia | South America | -                     | Meta             | Orinoco      | G1866     | DFO       | 1076        | -                           | 74087                     | 5.534    | -        | 5.55       | -70.25     |
| Colombia | South America | JUANCHITO             | CAUCA            | Magdalena    | G1983     | CVC       | 2606701     | 9003                        | 9274                      | 3.4507   | -        | 3.35       | -76.45     |
| Colombia | South America | MEDIACANOA            | CAUCA            | Magdalena    | G1984     | CVC       | 2608705     | 11880                       | 12118                     | 3.8996   | -        | 3.85       | -76.35     |
| Colombia | South America | GUAYABAL              | CAUCA            | Magdalena    | G1985     | CVC       | 2610706     | 15856                       | 16319                     | 4.4069   | -        | 4.35       | -76.15     |
| Colombia | South America | Magangue Esperanza    | BRAZO_DE_LOBA    | Magdalena    | G5017     | IDEAM     | 2502768     | 241612                      | 245422                    | 9.2531   | -        | 9.25       | -74.75     |
| Colombia | South America | PURIFICACION          | MAGDALENA        | Magdalena    | G5018     | IDEAM     | 2113701     | 25003                       | 25474                     | 3.8483   | -        | 3.75       | -74.95     |
| Colombia | South America | Regidor               | Magdalena        | Magdalena    | G5023     | IDEAM     | 2502741     | 134060                      | 139107                    | 8.6683   | -        | 8.65       | -73.85     |
| Colombia | South America | Salado Blanco         | Magdalena        | Magdalena    | G5052     | IDEAM     | 2101704     | 2971                        | 3216                      | 1.9880   | -        | 2.05       | -75.95     |
| Colombia | South America | Puerto Inmarco        | Magdalena        | Magdalena    | G5069     | IDEAM     | 2309704     | -                           | 74608                     | -        | -        | 6.25       | -74.55     |
| Colombia | South America | Narino                | Magdalena        | Magdalena    | G5083     | IDEAM     | 2123701     | 47219                       | 48455                     | 4.3879   | -        | 4.25       | -74.85     |
| Colombia | South America | Penas Blancas         | Magdalena        | Magdalena    | G5085     | IDEAM     | 2316701     | 85160                       | 87054                     | 6.9510   | -        | 6.85       | -74.05     |
| Colombia | South America | -                     | -                | -            | G5086     | Synthetic | -           | -                           | 21194                     | -        | -        | 6.05       | -69.95     |
| Colombia | South America | -                     | -                | -            | G5110     | Synthetic | -           | -                           | 344171                    | -        | -        | 6.05       | -67.45     |
| Colombia | South America | Cascada Simon Bolivar | Magdalena        | Magdalena    | G5113     | IDEAM     | 2101703     | 1102                        | 1608                      | 1.8735   | -        | 1.85       | -76.25     |
| Colombia | South America | Tres Cruces           | Cauca            | Magdalena    | G5121     | IDEAM     | 2502764     | 58323                       | 59789                     | 8.7030   | -        | 8.45       | -74.55     |
| Colombia | South America | -                     | -                | -            | G5123     | Synthetic | -           | -                           | 316158                    | -        | -        | 5.25       | -67.85     |
| Colombia | South America | Penoncito             | Magdalena        | Magdalena    | G5129     | IDEAM     | 2502733     | 135873                      | 140088                    | 8.9881   | -        | 8.95       | -73.85     |
| Colombia | South America | San Pablo             | Magdalena        | Magdalena    | G5133     | IDEAM     | 2320704     | 116909                      | 118960                    | 7.4799   | -        | 7.35       | -73.95     |
| Colombia | South America | -                     | -                | -            | G5153     | Synthetic | -           | -                           | 84323                     | -        | -        | 3.95       | -68.05     |
| Colombia | South America | -                     | -                | -            | G5154     | Synthetic | -           | -                           | 138738                    | -        | -        | 3.95       | -67.85     |
| Colombia | South America | -                     | -                | -            | G5156     | Synthetic | -           | -                           | 54167                     | -        | -        | 3.85       | -67.95     |
| Colombia | South America | La Magdalena          | Magdalena        | Magdalena    | G5182     | IDEAM     | 2101706     | 535                         | 618                       | 1.9055   | -        | 1.95       | -76.45     |
| Colombia | South America | La Esperanza          | Magdalena        | Magdalena    | G5241     | IDEAM     | 2109712     | 13051                       | 13234                     | 2.7355   | -        | 2.65       | -75.45     |
| Colombia | South America | Apavi                 | Cauca            | Magdalena    | G5256     | IDEAM     | 2624703     | 37734                       | 38269                     | 7.4711   | -        | 7.45       | -75.35     |



| Country            | Continent     | Station Name            | River Name    | River Basin   | GloFAS ID | Provider  | Provider ID | Catchment Area Provided km² | Catchment Area GloFAS km² | LAT Prov | LON Prov | LAT GloFAS | LON GloFAS |
|--------------------|---------------|-------------------------|---------------|---------------|-----------|-----------|-------------|-----------------------------|---------------------------|----------|----------|------------|------------|
| Colombia           | South America | La Virginia             | Cauca         | Magdalena     | G5263     | IDEAM     | 2617703     | 20345                       | 20518                     | 4.8803   | -        | 4.85       | -75.95     |
| Colombia           | South America | Puerto Valdivia         | Cauca         | Magdalena     | G5265     | IDEAM     | 2623704     | 37117                       | 37778                     | 7.2878   | -        | 7.35       | -75.35     |
| Colombia           | South America | Puente Pescadero        | Cauca         | Magdalena     | G5270     | IDEAM     | 2623705     | 35118                       | 35686                     | 7.0880   | -        | 7.05       | -75.75     |
| Colombia           | South America | Anacaro                 | Cauca         | Magdalena     | G5282     | CVC       | 2610711     | 16749                       | 17060                     | 4.7742   | -        | 4.65       | -76.05     |
| Colombia           | South America | Las Flores              | Cauca         | Magdalena     | G5288     | IDEAM     | 2502727     | 56018                       | 57211                     | 8.0995   | -        | 8.15       | -74.75     |
| Colombia           | South America | Margento                | Cauca         | Magdalena     | G5291     | IDEAM     | 2502705     | 41235                       | 42079                     | 8.0350   | -        | 8.05       | -74.95     |
| Colombia           | South America | Bolombolo               | Cauca         | Magdalena     | G5300     | IDEAM     | 2620708     | 30715                       | 31252                     | 5.9659   | -        | 5.95       | -75.85     |
| Colombia           | South America | Irra                    | Cauca         | Magdalena     | G5306     | IDEAM     | 2616707     | 24335                       | 24962                     | 5.2683   | -        | 5.25       | -75.65     |
| Colombia           | South America | La Pintada              | Cauca         | Magdalena     | G5307     | IDEAM     | 2618711     | 26206                       | 26689                     | 5.7328   | -        | 5.65       | -75.65     |
| Colombia           | South America | Puente Iglesias         | Cauca         | Magdalena     | G5308     | IDEAM     | 2620703     | 28761                       | 29032                     | 5.8290   | -        | 5.85       | -75.75     |
| Colombia           | South America | -                       | -             | -             | G5328     | Synthetic | -           | -                           | 27056                     | -        | -        | 4.85       | -67.95     |
| Colombia           | South America | -                       | -             | -             | G5333     | Synthetic | -           | -                           | 13088                     | -        | -        | -2.15      | -71.85     |
| Colombia           | South America | -                       | -             | -             | G5335     | Synthetic | -           | -                           | 48446                     | -        | -        | -2.45      | -72.75     |
| Colombia           | South America | La Victoria             | Cauca         | Magdalena     | G5383     | CVC       | 2610707     | 16115                       | 16442                     | 4.5220   | -        | 4.45       | -76.05     |
| Colombia           | South America | Olaya                   | Cauca         | Magdalena     | G5401     | IDEAM     | 2623710     | 33686                       | 33839                     | 6.6444   | -        | 6.55       | -75.85     |
| Colombia           | South America | Canafisto               | Cauca         | Magdalena     | G5405     | IDEAM     | 2621705     | 32402                       | 33224                     | 6.4179   | -        | 6.45       | -75.85     |
| Colombia           | South America | Hormiguero              | Cauca         | Magdalena     | G5437     | CVC       | 2605708     | 7321                        | 8409                      | 3.2999   | -        | 3.25       | -76.45     |
| Colombia           | South America | La Bolsa                | Cauca         | Magdalena     | G5438     | CVC       | 2602718     | 5902                        | 5689                      | 3.2001   | -        | 3.15       | -76.55     |
| Colombia           | South America | Ta blanca               | Cauca         | Magdalena     | G5668     | CVC       | 2605707     | 5064                        | 5071                      | 3.1179   | -        | 3.05       | -76.65     |
| Colombia           | South America | Suarez                  | Cauca         | Magdalena     | G5685     | CVC       | 2605716     | 3568                        | 3958                      | 2.9501   | -        | 2.85       | -76.65     |
| Colombia           | South America | La Balsa                | Cauca         | Magdalena     | G5689     | CVC       | 2602701     | 4611                        | 5071                      | 3.0924   | -        | 3.05       | -76.65     |
| Colombia           | South America | Barrancabermeja         | Magdalena     | Magdalena     | G5965     | IDEAM     | 2315703     | 89257                       | 91118                     | 7.0602   | -        | 6.95       | -73.95     |
| Colombia           | South America | Calamar                 | Magdalena     | Magdalena     | G6113     | IDEAM     | 2903702     | 254995                      | 259487                    | 10.25    | -        | 10.15      | -74.95     |
| Colombia           | South America | Tacamochó               | Magdalena     | Magdalena     | G6114     | Cirmag    | 2502794     | -                           | 253131                    | 9.4786   | -        | 9.55       | -74.75     |
| Colombia           | South America | Contento El             | Magdalena     | Magdalena     | G6115     | Cirmag    | 2321703     | -                           | 132603                    | 8.2246   | -        | 8.25       | -73.75     |
| Colombia           | South America | Sitio Nuevo R 11        | Magdalena     | Magdalena     | G6116     | Cirmag    | 2318728     | -                           | 121542                    | 7.7834   | -        | 7.75       | -73.85     |
| Colombia           | South America | Arrancaplumas           | Magdalena     | Magdalena     | G6117     | IDEAM     | 2123702     | 53498                       | 54753                     | 5.2013   | -        | 5.15       | -74.75     |
| Colombia           | South America | Angostura               | Magdalena     | Magdalena     | G6118     | IDEAM     | 2113705     | 21788                       | 22384                     | 3.4425   | -        | 3.35       | -75.15     |
| Colombia           | South America | Puente Santander        | Magdalena     | Magdalena     | G6119     | IDEAM     | 2109707     | 14897                       | 15337                     | 2.9428   | -        | 2.95       | -75.35     |
| Colombia           | South America | Paso del colegio        | Magdalena     | Magdalena     | G6120     | IDEAM     | 2107702     | 11728                       | 12121                     | 2.4622   | -        | 2.45       | -75.55     |
| Colombia           | South America | Pte Balseadero          | Magdalena     | Magdalena     | G6121     | IDEAM     | 2104701     | 5408                        | 5937                      | 2.2322   | -        | 2.25       | -75.65     |
| Colombia           | South America | Pericongo               | Magdalena     | Magdalena     | G6122     | IDEAM     | 2102701     | 3541                        | 3587                      | 2.0536   | -        | 2.05       | -75.85     |
| Dominican Republic | South America | Rio Yds En Villarpando  | Yaque Del Sur | Yaque Del Sur | G1698     | INDRHI    | 490002      | -                           | 4116                      | 18.655   | -        | 18.65      | -71.05     |
| Dominican Republic | South America | Rio Yds En Palo Alto    | Yaque Del Sur | Yaque Del Sur | G1699     | INDRHI    | 490003      | -                           | 5058                      | 18.298   | -        | 18.35      | -71.25     |
| Dominican Republic | South America | Rio San Juan En Paso De | San Juan      | Yaque Del Sur | G1700     | INDRHI    | 493006      | -                           | 117                       | 19.034   | -        | 19.05      | -71.35     |
| Dominican Republic | South America | Rio Yds En El Puente    | Yaque Del Sur | Yaque Del Sur | G1701     | INDRHI    | 490001      | -                           | 1764                      | 18.679   | -        | 18.75      | -71.05     |
| Dominican Republic | South America | Rio Yds En Los Guiros   | Yaque Del Sur | Yaque Del Sur | G1702     | INDRHI    | 490014      | -                           | 4469                      | 18.510   | -        | 18.55      | -70.95     |
| Dominican Republic | South America | Rio San Juan En Sabana  | Yaque Del Sur | Yaque Del Sur | G1703     | INDRHI    | 493007      | -                           | 1998                      | 18.726   | -        | 18.75      | -71.15     |
| Dominican Republic | South America | Rio Yds En Conuquito    | Yaque Del Sur | Yaque Del Sur | G1704     | INDRHI    | 490006      | -                           | 4940                      | 18.411   | -        | 18.45      | -71.15     |



| Country            | Continent     | Station Name             | River Name         | River Basin   | GloFAS ID | Provider  | Provider ID | Catchment Area Provided km² | Catchment Area GloFAS km² | LAT Prov | LON Prov | LAT GloFAS | LON GloFAS |
|--------------------|---------------|--------------------------|--------------------|---------------|-----------|-----------|-------------|-----------------------------|---------------------------|----------|----------|------------|------------|
| Dominican Republic | South America | Rio San Juan En Guazumal | San Juan           | Yaque Del Sur | G1705     | INDRHI    | 493002      | -                           | 940                       | 18.906   | -        | 18.85      | -71.25     |
| Dominican Republic | South America | Rio San Juan En Sabaneta | San Juan           | Yaque Del Sur | G1706     | INDRHI    | 493005      | -                           | 822                       | 18.976   | -        | 18.95      | -71.25     |
| Dominican Republic | South America | El Rosario               | San Juan           | Yaque Del Sur | G1707     | INDRHI    | -           | -                           | 1293                      | 18.75    | -71.2    | 18.75      | -71.25     |
| Ecuador            | South America | D J Sade                 | Esmeraldas         | Esmeraldas    | G1135     | GRDC      | 3844100     | 18800                       | 19287                     | -        | -        | -0.45      | -79.45     |
| Ecuador            | South America | -                        | -                  | -             | G5327     | Synthetic | -           | -                           | 12475                     | -        | -        | -2.05      | -79.95     |
| Ecuador            | South America | El Ciruelo               | Chira Piura        | Macara        | G5336     | SENAMH    | 200312      | 7693                        | 7253                      | -4.3     | -80      | -4.35      | -80.25     |
| Ecuador            | South America | FRANCISCO ORELLANO       | Napo               | Amazonas      | G5423     | HYBAM     | 1008090     | 12440                       | 18044                     | -        | -        | -0.45      | -76.95     |
| French Guyana      | South America | Langa Tabiki             | Maroni             | Maroni        | G1110     | GRDC      | 3512400     | 60930                       | 62801                     | 4.98     | -54.43   | 4.95       | -54.45     |
| French Guyana      | South America | -                        | -                  | -             | G5138     | Synthetic | -           | -                           | 37586                     | -        | -        | 4.35       | -54.35     |
| French Guyana      | South America | -                        | -                  | -             | G5143     | Synthetic | -           | -                           | 19658                     | -        | -        | 4.25       | -54.55     |
| French Guyana      | South America | -                        | -                  | -             | G5168     | Synthetic | -           | -                           | 25598                     | -        | -        | 3.35       | -57.55     |
| Guyana             | South America | Kamaria Falls            | Cuyuni             | Cuyuni        | G1094     | GRDC      | 3308400     | 53400                       | 53298                     | 6.43     | -58.82   | 6.45       | -58.85     |
| Guyana             | South America | Apaikwa                  | Mazaruni           | Cuyuni        | G1095     | GRDC      | 3308300     | 14000                       | 13196                     | 6.38     | -60.38   | 6.35       | -60.35     |
| Guyana             | South America | Plantain Island          | Essequibo          | Essequibo     | G1104     | GRDC      | 3308600     | 66600                       | 66621                     | 5.85     | -58.58   | 5.35       | -58.75     |
| Guyana             | South America | -                        | -                  | -             | G5104     | Synthetic | -           | -                           | 31932                     | -        | -        | 6.25       | -58.75     |
| Guyana             | South America | -                        | -                  | -             | G5150     | Synthetic | -           | -                           | 22880                     | -        | -        | 4.05       | -58.45     |
| Guyana             | South America | -                        | -                  | -             | G5155     | Synthetic | -           | -                           | 23492                     | -        | -        | 3.95       | -58.65     |
| Guyana             | South America | -                        | -                  | -             | G5169     | Synthetic | -           | -                           | 15955                     | -        | -        | 3.25       | -57.65     |
| Nicaragua          | South America | El Castillo              | San Juan           | San Juan      | G1054     | GRDC      | 4773800     | 28600                       | 32445                     | 11.02    | -84.42   | 10.95      | -84.45     |
| Nicaragua          | South America | Coco En Corriente Lira   | Coco               | Coco          | G1696     | INETER    | 4513        | -                           | 7606                      | 13.535   | -        | 13.55      | -85.85     |
| Nicaragua          | South America | Coco En Namasli          | Coco               | Coco          | G1697     | INETER    | 450105      | -                           | 3864                      | 13.457   | -        | 13.45      | -86.25     |
| Nicaragua          | South America | -                        | Escondido          | -             | G1789     | DFO       | 272         | -                           | 9828                      | 12.104   | -        | 12.05      | -84.05     |
| Panama             | South America | Calle Large              | Bayano             | -             | G1069     | GRDC      | 4977710     | -                           | 4287                      | 9.21     | -78.92   | 9.15       | -78.95     |
| Paraguay           | South America | Porto Murtinho           | Paraguai_ Paraguay | Parana        | G1411     | GRDC      | 3667060     | 474500                      | 562922                    | -        | -        | -21.65     | -57.95     |
| Paraguay           | South America | -                        | Tebicuary          | Parana        | G1852     | DFO       | 843         | -                           | 25532                     | -        | -        | -26.35     | -57.75     |
| Paraguay           | South America | -                        | Tebicuary          | Parana        | G1853     | DFO       | 845         | -                           | 20704                     | -        | -        | -26.55     | -57.25     |
| Paraguay           | South America | -                        | Paraguai_ Paraguay | Parana        | G1854     | DFO       | 856         | -                           | 740640                    | -        | -        | -24.75     | -57.25     |
| Paraguay           | South America | -                        | -                  | -             | G5815     | Synthetic | -           | -                           | 22470                     | -        | -        | -20.65     | -59.45     |
| Paraguay           | South America | -                        | -                  | -             | G5824     | Synthetic | -           | -                           | 14555                     | -        | -        | -20.85     | -59.75     |
| Paraguay           | South America | -                        | -                  | -             | G5825     | Synthetic | -           | -                           | 44726                     | -        | -        | -20.85     | -59.45     |
| Paraguay           | South America | -                        | -                  | -             | G5831     | Synthetic | -           | -                           | 29724                     | -        | -        | -20.95     | -59.75     |
| Paraguay           | South America | -                        | -                  | -             | G5852     | Synthetic | -           | -                           | 16388                     | -        | -        | -22.05     | -58.15     |
| Paraguay           | South America | -                        | -                  | -             | G5855     | Synthetic | -           | -                           | 15029                     | -        | -        | -22.15     | -57.85     |
| Paraguay           | South America | -                        | -                  | -             | G5868     | Synthetic | -           | -                           | 14298                     | -        | -        | -22.65     | -58.05     |
| Paraguay           | South America | -                        | -                  | -             | G5869     | Synthetic | -           | -                           | 608571                    | -        | -        | -22.65     | -57.85     |
| Paraguay           | South America | -                        | -                  | -             | G5878     | Synthetic | -           | -                           | 636577                    | -        | -        | -22.95     | -57.85     |
| Paraguay           | South America | -                        | -                  | -             | G5882     | Synthetic | -           | -                           | 660113                    | -        | -        | -23.05     | -57.65     |
| Paraguay           | South America | -                        | -                  | -             | G5883     | Synthetic | -           | -                           | 21346                     | -        | -        | -23.15     | -57.85     |
| Paraguay           | South America | -                        | -                  | -             | G5900     | Synthetic | -           | -                           | 17048                     | -        | -        | -23.95     | -57.35     |

| Country  | Continent     | Station Name        | River Name        | River Basin | GloFAS ID | Provider  | Provider ID | Catchment Area Provided km² | Catchment Area GloFAS km² | LAT Prov | LON Prov | LAT GloFAS | LON GloFAS |
|----------|---------------|---------------------|-------------------|-------------|-----------|-----------|-------------|-----------------------------|---------------------------|----------|----------|------------|------------|
| Paraguay | South America | Puerto Pilcomayo    | Paraguay          | Parana      | G5918     | BDHI      | 12606       | -                           | 877952                    | -25.42   | -        | -25.45     | -57.55     |
| Paraguay | South America | -                   | -                 | -           | G5928     | Synthetic | -           | -                           | 808970                    | -        | -        | -25.45     | -54.65     |
| Paraguay | South America | -                   | -                 | -           | G5947     | Synthetic | -           | -                           | 27941                     | -        | -        | -26.55     | -58.15     |
| Peru     | South America | Estirao Do Repouso  | Javari            | Amazonas    | G1182     | GRDC      | 3622400     | 62105                       | 61526                     | -        | -        | -4.35      | -70.95     |
| Peru     | South America | Palmeiras Do Javari | Javari            | Amazonas    | G1193     | GRDC      | 3622401     | 16256                       | 16650                     | -        | -        | -5.15      | -72.85     |
| Peru     | South America | -                   | Napo              | Amazonas    | G1867     | DFO       | 1077        | -                           | 45484                     | -1.125   | -        | -1.15      | -75.05     |
| Peru     | South America | -                   | Maranon           | Amazonas    | G1869     | DFO       | 1081        | -                           | 303961                    | -4.635   | -        | -4.55      | -74.75     |
| Peru     | South America | -                   | Ucayali           | Amazonas    | G1870     | DFO       | 1083        | -                           | 258642                    | -8.325   | -        | -8.35      | -74.45     |
| Peru     | South America | -                   | Ucayali           | Amazonas    | G1871     | DFO       | 1084        | -                           | 239850                    | -8.595   | -        | -8.65      | -74.35     |
| Peru     | South America | -                   | Ucayali           | Amazonas    | G1872     | DFO       | 1086        | -                           | 318575                    | -5.175   | -        | -5.15      | -74.05     |
| Peru     | South America | -                   | Ucayali           | Amazonas    | G1875     | DFO       | 1092        | -                           | 196272                    | -        | -        | -10.25     | -74.05     |
| Peru     | South America | -                   | Ica               | Amazonas    | G1876     | DFO       | 1093        | -                           | 78926                     | -2.385   | -        | -2.35      | -71.25     |
| Peru     | South America | Puente Piura        | Piura             | Piura       | G5249     | SENAMH    | 201201      | 8038                        | 7973                      | -5.18    | -80.62   | -5.25      | -80.65     |
| Peru     | South America | -                   | -                 | -           | G5334     | Synthetic | -           | -                           | 85489                     | -        | -        | -2.45      | -73.75     |
| Peru     | South America | Bellavista          | Napo              | Amazonas    | G5378     | SENAMH    | 240111      | 100136                      | 100157                    | -3       | -73      | -3.45      | -73.05     |
| Peru     | South America | -                   | -                 | -           | G5389     | Synthetic | -           | -                           | 23801                     | -        | -        | -3.65      | -74.55     |
| Peru     | South America | -                   | -                 | -           | G5393     | Synthetic | -           | -                           | 14048                     | -        | -        | -3.85      | -75.15     |
| Peru     | South America | -                   | -                 | -           | G5394     | Synthetic | -           | -                           | 17116                     | -        | -        | -3.75      | -73.25     |
| Peru     | South America | Tamshiyacu          | Amazonas          | Amazonas    | G5395     | SENAMH    | 240103      | 721521                      | 721199                    | -4       | -73      | -4.05      | -73.15     |
| Peru     | South America | -                   | -                 | -           | G5417     | Synthetic | -           | -                           | 14992                     | -        | -        | -4.75      | -80.55     |
| Peru     | South America | -                   | -                 | -           | G5418     | Synthetic | -           | -                           | 42892                     | -        | -        | -4.35      | -74.25     |
| Peru     | South America | Tabatinga           | Amazon _ Amazonas | Amazonas    | G5419     | CEMADE    | 1010000     | 874000                      | 876876                    | -        | -        | -4.25      | -69.95     |
| Peru     | South America | Nauta               | Maranon           | Amazonas    | G5424     | SENAMH    | 220105      | 356274                      | 362932                    | -4       | -73      | -4.45      | -73.95     |
| Peru     | South America | -                   | -                 | -           | G5426     | Synthetic | -           | -                           | 316475                    | -        | -        | -4.55      | -74.25     |
| Peru     | South America | Guayaquil           | Ucayali           | Amazonas    | G5427     | SENAMH    | 250101      | 346049                      | 347454                    | -5       | -73.84   | -4.75      | -73.65     |
| Peru     | South America | -                   | -                 | -           | G5429     | Synthetic | -           | -                           | 16383                     | -        | -        | -4.65      | -77.15     |
| Peru     | South America | Yuracyacu           | Maranon           | Amazonas    | G5433     | SENAMH    | 220107      | 114232                      | 114968                    | -4.47    | -77      | -4.45      | -77.55     |
| Peru     | South America | -                   | -                 | -           | G5447     | Synthetic | -           | -                           | 193152                    | -        | -        | -5.05      | -75.65     |
| Peru     | South America | Puente Crisnejas    | Huallaga          | Amazonas    | G5451     | SENAMH    | 230601      | 68435                       | 68364                     | -6.57    | -        | -6.55      | -76.25     |
| Peru     | South America | -                   | -                 | -           | G5452     | Synthetic | -           | -                           | 18703                     | -        | -        | -5.15      | -73.85     |
| Peru     | South America | El Tigre            | Tumbes            | Tumbes      | G5469     | SENAMH    | 200202      | 4768                        | 4798                      | -3.72    | -80.47   | -3.85      | -80.45     |
| Peru     | South America | -                   | -                 | -           | G5515     | Synthetic | -           | -                           | 47359                     | -        | -        | -7.05      | -76.65     |
| Peru     | South America | -                   | -                 | -           | G5516     | Synthetic | -           | -                           | 23226                     | -        | -        | -8.25      | -76.55     |
| Peru     | South America | -                   | -                 | -           | G5548     | Synthetic | -           | -                           | 22059                     | -        | -        | -9.45      | -74.95     |
| Peru     | South America | Laguna Paton        | Urubamba          | Amazonas    | G5580     | SENAMH    | 230403      | 9160                        | 9101                      | -        | -        | -13.25     | -72.45     |
| Peru     | South America | -                   | -                 | -           | G5584     | Synthetic | -           | -                           | 130005                    | -        | -        | -10.85     | -73.75     |
| Peru     | South America | -                   | -                 | -           | G5594     | Synthetic | -           | -                           | 18115                     | -        | -        | -11.15     | -74.35     |
| Peru     | South America | -                   | -                 | -           | G5598     | Synthetic | -           | -                           | 126407                    | -        | -        | -11.15     | -74.15     |
| Peru     | South America | -                   | -                 | -           | G5617     | Synthetic | -           | -                           | 27558                     | -        | -        | -12.35     | -74.65     |

| Country | Continent     | Station Name           | River Name         | River Basin     | GloFAS ID | Provider  | Provider ID | Catchment Area Provided km² | Catchment Area GloFAS km² | LAT Prov | LON Prov | LAT GloFAS | LON GloFAS |
|---------|---------------|------------------------|--------------------|-----------------|-----------|-----------|-------------|-----------------------------|---------------------------|----------|----------|------------|------------|
| Peru    | South America | -                      | -                  | -               | G5618     | Synthetic | -           | -                           | 63171                     | -        | -        | -12.55     | -73.85     |
| Peru    | South America | -                      | -                  | -               | G5620     | Synthetic | -           | -                           | 19501                     | -        | -        | -12.45     | -69.25     |
| Peru    | South America | -                      | -                  | -               | G5625     | Synthetic | -           | -                           | 54805                     | -        | -        | -12.55     | -69.35     |
| Peru    | South America | -                      | -                  | -               | G5631     | Synthetic | -           | -                           | 33978                     | -        | -        | -12.65     | -69.85     |
| Peru    | South America | -                      | -                  | -               | G5632     | Synthetic | -           | -                           | 15636                     | -        | -        | -12.65     | -69.25     |
| Peru    | South America | -                      | -                  | -               | G5636     | Synthetic | -           | -                           | 19398                     | -        | -        | -12.75     | -69.85     |
| Peru    | South America | -                      | -                  | -               | G5639     | Synthetic | -           | -                           | 2591                      | -        | -        | -14.25     | -73.95     |
| Peru    | South America | -                      | -                  | -               | G5640     | Synthetic | -           | -                           | 24852                     | -        | -        | -13.55     | -72.55     |
| Peru    | South America | Llusta                 | Ilave              | Ilave           | G5688     | SENAMH    | 210301      | 8384                        | 8245                      | -16      | -69.63   | -15.95     | -69.35     |
| Peru    | South America | Puente Coata Unocolla  | Coata              | Coata           | G6091     | SENAMH    | 210407      | 4551                        | 4910                      | -15.45   | -70.19   | -15.55     | -70.05     |
| Peru    | South America | Puente Huancane        | Huancane           | Huancane        | G6092     | SENAMH    | 210201      | 3682                        | 3990                      | -15.22   | -69.8    | -15.25     | -69.75     |
| Peru    | South America | Charcani               | Chili              | Quilca          | G6093     | SENAMH    | 204710      | 4504                        | 4077                      | -16.28   | -71.62   | -16.35     | -71.55     |
| Peru    | South America | Huatiapa               | Majes              | Majes           | G6094     | SENAMH    | 204617      | 13129                       | 11696                     | -16      | -72.47   | -15.95     | -72.45     |
| Peru    | South America | Puente Ocona           | Ocona              | Ocona           | G6095     | SENAMH    | 204504      | 16010                       | 14994                     | -16      | -73.12   | -16.35     | -73.15     |
| Peru    | South America | La Capilla             | Mala               | Mala            | G6096     | SENAMH    | 203101      | 2088                        | 2148                      | -12.52   | -76      | -12.45     | -76.45     |
| Peru    | South America | Chosica                | Rimac              | Rimac           | G6097     | SENAMH    | 202906      | 2281                        | 2631                      | -11.93   | -76.69   | -12.05     | -76.85     |
| Peru    | South America | Santo Domingo          | Chancay Huaral     | Chancay Huaral  | G6098     | SENAMH    | 202701      | 1831                        | 1919                      | -11.38   | -77.05   | -11.35     | -76.95     |
| Peru    | South America | Obrajillo              | Chillon            | Chancay Huaral  | G6099     | SENAMH    | 202802      | 451                         | 1198                      | -11.49   | -76.64   | -11.65     | -76.75     |
| Peru    | South America | Condorcerro            | Santa              | Santa           | G6100     | SENAMH    | 211402      | -                           | 7384                      | -8.65    | -78.25   | -8.65      | -78.15     |
| Peru    | South America | Salinar                | Chicama            | Chicama         | G6101     | SENAMH    | 211008      | 2480                        | 2435                      | -7.67    | -78.97   | -7.55      | -78.85     |
| Peru    | South America | Racarumi               | Chancay            | Chancay         | G6102     | SENAMH    | 200907      | 2371                        | 1832                      | -6.63    | -79      | -6.65      | -79.15     |
| Peru    | South America | Puchaca                | La Leche           | Motupe          | G6103     | SENAMH    | 200801      | 322                         | 1101                      | -6.37    | -79.47   | -6.45      | -79.55     |
| Peru    | South America | Shanao                 | Mayo               | Amazonas        | G6104     | SENAMH    | 221802      | 8448                        | 8691                      | -6.42    | -76.59   | -6.45      | -76.55     |
| Peru    | South America | Puente Carretera Ramis | Ramis              | Ramis           | G6105     | SENAMH    | 210101      | 15622                       | 15045                     | -15.25   | -69.87   | -15.25     | -69.95     |
| Uruguay | South America | Paso Borracho          | Tacuarembó         | Negro (Uruguay) | G1478     | GRDC      | 3469210     | -                           | 6021                      | -31.88   | -55.47   | -31.85     | -55.45     |
| Uruguay | South America | Paso Centuri           | Yaguaron           | -               | G1479     | GRDC      | 3471200     | -                           | 4244                      | -32.12   | -53.73   | -32.15     | -53.75     |
| Uruguay | South America | Paso De La Laguna      | Tacuarembó         | Negro (Uruguay) | G1480     | GRDC      | 3469200     | 14038                       | 14692                     | -32.23   | -55.4    | -32.25     | -55.45     |
| Uruguay | South America | Paso Pereira           | Negro              | Negro (Uruguay) | G1481     | GRDC      | 3469400     | 11773                       | 10851                     | -32.42   | -55.2    | -32.45     | -55.35     |
| Uruguay | South America | Laguna Merin           | Yaguaron _Jaguarao | -               | G1483     | GRDC      | 3471100     | -                           | 6441                      | -32.53   | -53.47   | -32.55     | -53.45     |
| Uruguay | South America | Paso Del Bote          | Yi                 | Negro (Uruguay) | G1489     | GRDC      | 3469150     | 12668                       | 12816                     | -33.22   | -56.9    | -33.15     | -57.05     |
| Uruguay | South America | Treinta Y Tres         | Olimar             | -               | G1491     | GRDC      | 3471400     | -                           | 4512                      | -33.25   | -54.4    | -33.25     | -54.35     |
| Uruguay | South America | Picada De Corbo        | Cebollati          | -               | G1496     | GRDC      | 3471300     | -                           | 2505                      | -33.83   | -54.77   | -33.85     | -54.75     |
| Uruguay | South America | Paso Pache             | Santa Lucia        | -               | G1501     | GRDC      | 3458100     | -                           | 4512                      | -34.37   | -56.25   | -34.35     | -56.25     |
| Uruguay | South America | San Carlos             | Arroyo San Carlos  | -               | G1505     | GRDC      | 3458200     | -                           | 1188                      | -34.77   | -54.9    | -34.75     | -54.95     |
| Uruguay | South America | -                      | Negro              | Negro (Uruguay) | G1836     | DFO       | 783         | -                           | 3781                      | -        | -        | -31.75     | -54.55     |
| Uruguay | South America | -                      | Negro              | Negro (Uruguay) | G1837     | DFO       | 784         | -                           | 5704                      | -        | -        | -32.05     | -54.55     |
| Uruguay | South America | -                      | Cebollati          | -               | G1838     | DFO       | 790         | -                           | 6108                      | -        | -        | -33.75     | -54.45     |
| Uruguay | South America | -                      | -                  | -               | G6020     | Synthetic | -           | -                           | 13122                     | -        | -        | -30.25     | -57.55     |
| Uruguay | South America | -                      | -                  | -               | G6026     | Synthetic | -           | -                           | 228052                    | -        | -        | -31.35     | -57.95     |

| Country   | Continent     | Station Name     | River Name | River Basin | GloFAS ID | Provider  | Provider ID | Catchment Area Provided km² | Catchment Area GloFAS km² | LAT Prov | LON Prov | LAT GloFAS | LON GloFAS |
|-----------|---------------|------------------|------------|-------------|-----------|-----------|-------------|-----------------------------|---------------------------|----------|----------|------------|------------|
| Venezuela | South America | Ejido            | Chama      | -           | G1075     | GRDC      | 3205220     | -                           | 1104                      | 8.55     | -71.19   | 8.55       | -71.15     |
| Venezuela | South America | Puente Angostura | Orinoco    | Orinoco     | G1079     | GRDC      | 3206720     | 836000                      | 833263                    | 8.15     | -63.6    | 8.25       | -62.95     |
| Venezuela | South America | Canagua          | Canagua    | Orinoco     | G1080     | GRDC      | 3206080     | -                           | 859                       | 8.13     | -71.45   | 8.15       | -71.35     |
| Venezuela | South America | Pie De Salto     | Caura      | Orinoco     | G1096     | GRDC      | 3206640     | -                           | 30486                     | 6.31     | -64.48   | 6.25       | -64.45     |
| Venezuela | South America | Dos Aguas        | Caura      | Orinoco     | G1100     | GRDC      | 3206630     | 25000                       | 25678                     | 5.97     | -64.43   | 5.95       | -64.45     |
| Venezuela | South America | Entre Rios       | Caura      | Orinoco     | G1101     | GRDC      | 3206620     | -                           | 13462                     | 5.93     | -64.42   | 5.55       | -64.35     |
| Venezuela | South America | El Perro         | Erebato    | Orinoco     | G1102     | GRDC      | 3206610     | 11610                       | 10860                     | 5.9      | -64.49   | 5.85       | -64.55     |
| Venezuela | South America | Tama Tama        | Orinoco    | Orinoco     | G1123     | GRDC      | 3206800     | 37870                       | 37839                     | 3.12     | -65.87   | 3.05       | -65.45     |
| Venezuela | South America | Cucui            | Negro      | Amazonas    | G1130     | GRDC      | 3618090     | 61781                       | 74213                     | 1.2153   | -        | 1.35       | -66.85     |
| Venezuela | South America | -                | Caratumbo  | -           | G1754     | DFO       | 135         | -                           | 24171                     | 9.044    | -        | 9.05       | -72.25     |
| Venezuela | South America | -                | Orinoco    | Orinoco     | G1755     | DFO       | 137         | -                           | 517551                    | 7.334    | -        | 7.35       | -66.65     |
| Venezuela | South America | -                | Apure      | Orinoco     | G1756     | DFO       | 138         | -                           | 65341                     | 7.964    | -        | 7.95       | -67.65     |
| Venezuela | South America | -                | Orinoco    | Orinoco     | G1757     | DFO       | 141         | -                           | 1104                      | 8.684    | -        | 8.65       | -62.15     |
| Venezuela | South America | -                | Arauca     | Orinoco     | G1863     | DFO       | 1064        | -                           | 15754                     | 7.064    | -        | 7.05       | -69.45     |
| Venezuela | South America | -                | Orinoco    | Orinoco     | G1864     | DFO       | 1067        | -                           | 480251                    | 6.614    | -        | 6.65       | -67.15     |
| Venezuela | South America | -                | Apure      | Orinoco     | G1989     | DFO       | 100079      | -                           | 44582                     | 8.054    | -        | 8.05       | -69.35     |
| Venezuela | South America | -                | Apure      | Orinoco     | G1990     | DFO       | 100080      | -                           | 54293                     | 7.874    | -        | 7.85       | -68.75     |
| Venezuela | South America | -                | -          | Orinoco     | G1991     | DFO       | 100081      | -                           | 18337                     | 7.514    | -        | 7.45       | -68.45     |
| Venezuela | South America | -                | -          | Orinoco     | G1992     | DFO       | 100082      | -                           | 3935                      | 7.604    | -        | 7.65       | -68.65     |
| Venezuela | South America | -                | -          | Orinoco     | G1993     | DFO       | 100083      | -                           | 3198                      | 7.334    | -        | 7.35       | -67.75     |
| Venezuela | South America | -                | Capanaparo | Orinoco     | G1994     | DFO       | 100084      | -                           | 15636                     | 7.064    | -        | 7.05       | -67.45     |
| Venezuela | South America | -                | -          | Orinoco     | G1995     | DFO       | 100088      | -                           | 830071                    | 8.144    | -        | 8.15       | -63.45     |
| Venezuela | South America | -                | -          | -           | G5028     | Synthetic | -           | 251622                      | 14898                     | -        | -        | 6.95       | -67.85     |
| Venezuela | South America | -                | -          | -           | G5047     | Synthetic | -           | -                           | 90167                     | -        | -        | 7.85       | -63.05     |
| Venezuela | South America | -                | -          | -           | G5053     | Synthetic | -           | -                           | 804501                    | -        | -        | 8.05       | -64.25     |
| Venezuela | South America | -                | Apure      | Orinoco     | G5057     | DFO       | 100129      | -                           | 19830                     | 7.874    | -        | 7.95       | -67.45     |
| Venezuela | South America | -                | -          | -           | G5058     | Synthetic | -           | -                           | 15258                     | -        | -        | 7.95       | -64.25     |
| Venezuela | South America | -                | -          | -           | G5060     | Synthetic | -           | -                           | 17600                     | -        | -        | 7.35       | -68.75     |
| Venezuela | South America | -                | -          | -           | G5063     | Synthetic | -           | -                           | 101446                    | -        | -        | 6.05       | -69.45     |
| Venezuela | South America | -                | -          | -           | G5064     | Synthetic | -           | -                           | 138935                    | -        | -        | 7.65       | -66.45     |
| Venezuela | South America | -                | -          | -           | G5065     | Synthetic | -           | -                           | 712153                    | -        | -        | 7.65       | -66.05     |
| Venezuela | South America | -                | -          | -           | G5066     | Synthetic | -           | -                           | 745603                    | -        | -        | 7.65       | -64.95     |
| Venezuela | South America | -                | -          | -           | G5070     | Synthetic | -           | -                           | 17488                     | -        | -        | 7.55       | -65.95     |
| Venezuela | South America | -                | -          | -           | G5071     | Synthetic | -           | -                           | 48214                     | -        | -        | 7.55       | -64.95     |
| Venezuela | South America | -                | -          | -           | G5103     | Synthetic | -           | -                           | 109212                    | -        | -        | 6.25       | -67.55     |
| Venezuela | South America | -                | -          | -           | G5109     | Synthetic | -           | -                           | 19707                     | -        | -        | 8.05       | -67.45     |
| Venezuela | South America | -                | -          | -           | G5130     | Synthetic | -           | -                           | 13704                     | -        | -        | 4.95       | -67.75     |
| Venezuela | South America | -                | -          | -           | G5134     | Synthetic | -           | -                           | 49832                     | -        | -        | 8.15       | -67.65     |
| Venezuela | South America | -                | -          | -           | G5148     | Synthetic | -           | -                           | 101574                    | -        | -        | 4.05       | -67.65     |

| Country   | Continent     | Station Name | River Name | River Basin | GloFAS ID | Provider  | Provider ID | Catchment Area Provided km <sup>2</sup> | Catchment Area GloFAS km <sup>2</sup> | LAT Prov | LON Prov | LAT GloFAS | LON GloFAS |
|-----------|---------------|--------------|------------|-------------|-----------|-----------|-------------|-----------------------------------------|---------------------------------------|----------|----------|------------|------------|
| Venezuela | South America | -            | -          | -           | G5149     | Synthetic | -           | -                                       | 41361                                 | -        | -        | 4.05       | -66.95     |
| Venezuela | South America | -            | -          | -           | G5157     | Synthetic | -           | -                                       | 57247                                 | -        | -        | 3.85       | -67.05     |
| Venezuela | South America | -            | -          | -           | G5183     | Synthetic | -           | -                                       | 42921                                 | -        | -        | 2.05       | -67.05     |
| Venezuela | South America | -            | -          | -           | G5247     | Synthetic | -           | -                                       | 38127                                 | -        | -        | 6.85       | -63.05     |
| Venezuela | South America | -            | -          | -           | G5259     | Synthetic | -           | -                                       | 101327                                | -        | -        | 3.95       | -67.55     |
| Venezuela | South America | -            | -          | -           | G5279     | Synthetic | -           | -                                       | 467685                                | -        | -        | 6.35       | -67.25     |
| Venezuela | South America | -            | -          | -           | G5280     | Synthetic | -           | -                                       | 42202                                 | -        | -        | 6.85       | -62.85     |
